# Supplementary material for: An ABA-GA bistable switch can account for natural variation in the variability of Arabidopsis seed germination time
Source: eLife. 2021 Jun 1;10:e59485. doi: 10.7554/eLife.59485 (PMC8169117; doi:10.7554/eLife.59485)
Supplement: Figure 1—figure supplement 1—source data 1. [file elife-59485-fig1-figsupp1-data1.tds]

Magic_line	meanDAR	Sowing1 (~30DAR)	Sowing1b (~30DAR)	Sowing2 (~45DAR)	Sowing3 (~60DAR)
Bur-0	30	0.092542656	NA	0.17657047	NA
Can-0	28	0.111244159	NA	0.155366758	0.147949272
Col-0	33	0.014674071	NA	0.063915042	0.109277504
Ct-1	28	0.159623298	NA	0.07844928	0.161954695
Edi-1	21	0.197084261	NA	0.225265927	NA
Hi-0	31	0.249750211	NA	0.220625425	0.202508429
Kn-0	23	0.150271941	NA	0.171439522	NA
Ler-0	28	0.169954095	NA	0.200568816	0.140520265
Mt-0	29	0.209614219	NA	0.16606664	0.108474777
No-0	26	0.287166899	NA	0.251488329	0.248475927
Oy-0	27	0.241536971	NA	0.310252614	0.187469977
Po-0	28	0.311554207	NA	0.245496913	0.265844357
Rsch-4	29	0.241956967	NA	0.177280565	0.137500761
Sf-2	29	NA	0.324571891	NA	NA
Tsu-0	28	0.243318288	NA	0.222620186	0.177798711
Wil-2	28	0.185985713	NA	0.205956272	NA
Ws-0	29	NA	0.361587277	NA	NA
Wu-0	28	0.2729668	NA	0.282034396	0.23712643
Zu-0	32	NA	0.257913072	NA	NA
