# Supplementary material for: An ABA-GA bistable switch can account for natural variation in the variability of Arabidopsis seed germination time
Source: eLife. 2021 Jun 1;10:e59485. doi: 10.7554/eLife.59485 (PMC8169117; doi:10.7554/eLife.59485)
Supplement: Figure 1—figure supplement 1—source data 3. [file elife-59485-fig1-figsupp1-data3.tds]

Magic_line	High_or_low_var	experiment	tray	Plant	Sowing.day	Sowing.month	Sowing_date	Year	DAR	Total_germ	day	number	name	perc
178	H	1	1	pooled from 3	28th	11	28-Nov	16	28	602	1	0	178_1	0
178	H	1	1	pooled from 3	28th	11	28-Nov	16	28	602	2	0	178_1	0
178	H	1	1	pooled from 3	28th	11	28-Nov	16	28	602	3	0	178_1	0
178	H	1	1	pooled from 3	28th	11	28-Nov	16	28	602	4	8	178_1	1.328903654
178	H	1	1	pooled from 3	28th	11	28-Nov	16	28	602	5	110	178_1	18.27242525
178	H	1	1	pooled from 3	28th	11	28-Nov	16	28	602	6	158	178_1	26.24584718
178	H	1	1	pooled from 3	28th	11	28-Nov	16	28	602	7	138	178_1	22.92358804
178	H	1	1	pooled from 3	28th	11	28-Nov	16	28	602	8	56	178_1	9.302325581
178	H	1	1	pooled from 3	28th	11	28-Nov	16	28	602	9	69	178_1	11.46179402
178	H	1	1	pooled from 3	28th	11	28-Nov	16	28	602	10	10	178_1	1.661129568
178	H	1	1	pooled from 3	28th	11	28-Nov	16	28	602	11	27	178_1	4.485049834
178	H	1	1	pooled from 3	28th	11	28-Nov	16	28	602	12	9	178_1	1.495016611
178	H	1	1	pooled from 3	28th	11	28-Nov	16	28	602	13	4	178_1	0.664451827
178	H	1	1	pooled from 3	28th	11	28-Nov	16	28	602	14	5	178_1	0.830564784
178	H	1	1	pooled from 3	28th	11	28-Nov	16	28	602	15	2	178_1	0.332225914
178	H	1	1	pooled from 3	28th	11	28-Nov	16	28	602	16	2	178_1	0.332225914
178	H	1	1	pooled from 3	28th	11	28-Nov	16	28	602	17	0	178_1	0
178	H	1	1	pooled from 3	28th	11	28-Nov	16	28	602	18	3	178_1	0.49833887
178	H	1	1	pooled from 3	28th	11	28-Nov	16	28	602	19	0	178_1	0
178	H	1	1	pooled from 3	28th	11	28-Nov	16	28	602	20	0	178_1	0
178	H	1	1	pooled from 3	28th	11	28-Nov	16	28	602	21	0	178_1	0
178	H	1	1	pooled from 3	28th	11	28-Nov	16	28	602	22	0	178_1	0
178	H	1	1	pooled from 3	28th	11	28-Nov	16	28	602	23	1	178_1	0.166112957
178	H	1	1	pooled from 3	28th	11	28-Nov	16	28	602	24	0	178_1	0
178	H	1	1	pooled from 3	28th	11	28-Nov	16	28	602	25	0	178_1	0
178	H	1	1	pooled from 3	28th	11	28-Nov	16	28	602	26	0	178_1	0
178	H	1	1	pooled from 3	28th	11	28-Nov	16	28	602	27	0	178_1	0
178	H	1	1	pooled from 3	28th	11	28-Nov	16	28	602	28	0	178_1	0
178	H	1	1	pooled from 3	28th	11	28-Nov	16	28	602	29	0	178_1	0
178	H	1	1	pooled from 3	28th	11	28-Nov	16	28	602	30	0	178_1	0
178	H	1	1	pooled from 3	28th	11	28-Nov	16	28	602	31	0	178_1	0
178	H	1	1	pooled from 3	28th	11	28-Nov	16	28	602	32	0	178_1	0
178	H	1	1	pooled from 3	28th	11	28-Nov	16	28	602	33	0	178_1	0
178	H	1	1	pooled from 3	28th	11	28-Nov	16	28	602	34	0	178_1	0
178	H	1	1	pooled from 3	28th	11	28-Nov	16	28	602	35	0	178_1	0
178	H	1	1	pooled from 3	28th	11	28-Nov	16	28	602	36	0	178_1	0
178	H	1	1	pooled from 3	28th	11	28-Nov	16	28	602	37	0	178_1	0
178	H	1	1	pooled from 3	28th	11	28-Nov	16	28	602	38	0	178_1	0
178	H	1	1	pooled from 3	28th	11	28-Nov	16	28	602	39	0	178_1	0
178	H	1	1	pooled from 3	28th	11	28-Nov	16	28	602	40	0	178_1	0
178	H	1	1	pooled from 3	28th	11	28-Nov	16	28	602	41	0	178_1	0
178	H	1	1	pooled from 3	28th	11	28-Nov	16	28	602	42	0	178_1	0
178	H	1	1	pooled from 3	28th	11	28-Nov	16	28	602	43	0	178_1	0
178	H	1	1	pooled from 3	28th	11	28-Nov	16	28	602	44	0	178_1	0
178	H	1	1	pooled from 3	28th	11	28-Nov	16	28	602	45	0	178_1	0
178	H	1	1	pooled from 3	28th	11	28-Nov	16	28	602	46	0	178_1	0
178	H	1	1	pooled from 3	28th	11	28-Nov	16	28	602	47	0	178_1	0
178	H	1	1	pooled from 3	28th	11	28-Nov	16	28	602	48	0	178_1	0
178	H	1	1	pooled from 3	28th	11	28-Nov	16	28	602	49	0	178_1	0
178	H	1	1	pooled from 3	28th	11	28-Nov	16	28	602	50	0	178_1	0
178	H	1	1	pooled from 3	28th	11	28-Nov	16	28	602	51	0	178_1	0
178	H	1	1	pooled from 3	28th	11	28-Nov	16	28	602	52	0	178_1	0
178	H	1	1	pooled from 3	28th	11	28-Nov	16	28	602	53	0	178_1	0
178	H	1	1	pooled from 3	28th	11	28-Nov	16	28	602	54	0	178_1	0
178	H	1	1	pooled from 3	28th	11	28-Nov	16	28	602	55	0	178_1	0
178	H	1	1	pooled from 3	28th	11	28-Nov	16	28	602	56	0	178_1	0
178	H	1	1	pooled from 3	28th	11	28-Nov	16	28	602	57	0	178_1	0
178	H	1	1	pooled from 3	28th	11	28-Nov	16	28	602	58	0	178_1	0
178	H	1	1	pooled from 3	28th	11	28-Nov	16	28	602	59	0	178_1	0
178	H	1	1	pooled from 3	28th	11	28-Nov	16	28	602	60	0	178_1	0
178	H	1	2	same pool	28th	11	28-Nov	16	28	421	1	0	178_2	0
178	H	1	2	same pool	28th	11	28-Nov	16	28	421	2	0	178_2	0
178	H	1	2	same pool	28th	11	28-Nov	16	28	421	3	1	178_2	0.237529691
178	H	1	2	same pool	28th	11	28-Nov	16	28	421	4	21	178_2	4.988123515
178	H	1	2	same pool	28th	11	28-Nov	16	28	421	5	107	178_2	25.41567696
178	H	1	2	same pool	28th	11	28-Nov	16	28	421	6	102	178_2	24.2280285
178	H	1	2	same pool	28th	11	28-Nov	16	28	421	7	94	178_2	22.32779097
178	H	1	2	same pool	28th	11	28-Nov	16	28	421	8	37	178_2	8.788598575
178	H	1	2	same pool	28th	11	28-Nov	16	28	421	9	35	178_2	8.313539192
178	H	1	2	same pool	28th	11	28-Nov	16	28	421	10	4	178_2	0.950118765
178	H	1	2	same pool	28th	11	28-Nov	16	28	421	11	12	178_2	2.850356295
178	H	1	2	same pool	28th	11	28-Nov	16	28	421	12	3	178_2	0.712589074
178	H	1	2	same pool	28th	11	28-Nov	16	28	421	13	0	178_2	0
178	H	1	2	same pool	28th	11	28-Nov	16	28	421	14	2	178_2	0.475059382
178	H	1	2	same pool	28th	11	28-Nov	16	28	421	15	0	178_2	0
178	H	1	2	same pool	28th	11	28-Nov	16	28	421	16	1	178_2	0.237529691
178	H	1	2	same pool	28th	11	28-Nov	16	28	421	17	0	178_2	0
178	H	1	2	same pool	28th	11	28-Nov	16	28	421	18	0	178_2	0
178	H	1	2	same pool	28th	11	28-Nov	16	28	421	19	0	178_2	0
178	H	1	2	same pool	28th	11	28-Nov	16	28	421	20	0	178_2	0
178	H	1	2	same pool	28th	11	28-Nov	16	28	421	21	0	178_2	0
178	H	1	2	same pool	28th	11	28-Nov	16	28	421	22	0	178_2	0
178	H	1	2	same pool	28th	11	28-Nov	16	28	421	23	0	178_2	0
178	H	1	2	same pool	28th	11	28-Nov	16	28	421	24	0	178_2	0
178	H	1	2	same pool	28th	11	28-Nov	16	28	421	25	0	178_2	0
178	H	1	2	same pool	28th	11	28-Nov	16	28	421	26	0	178_2	0
178	H	1	2	same pool	28th	11	28-Nov	16	28	421	27	0	178_2	0
178	H	1	2	same pool	28th	11	28-Nov	16	28	421	28	0	178_2	0
178	H	1	2	same pool	28th	11	28-Nov	16	28	421	29	0	178_2	0
178	H	1	2	same pool	28th	11	28-Nov	16	28	421	30	0	178_2	0
178	H	1	2	same pool	28th	11	28-Nov	16	28	421	31	0	178_2	0
178	H	1	2	same pool	28th	11	28-Nov	16	28	421	32	0	178_2	0
178	H	1	2	same pool	28th	11	28-Nov	16	28	421	33	0	178_2	0
178	H	1	2	same pool	28th	11	28-Nov	16	28	421	34	0	178_2	0
178	H	1	2	same pool	28th	11	28-Nov	16	28	421	35	0	178_2	0
178	H	1	2	same pool	28th	11	28-Nov	16	28	421	36	2	178_2	0.475059382
178	H	1	2	same pool	28th	11	28-Nov	16	28	421	37	0	178_2	0
178	H	1	2	same pool	28th	11	28-Nov	16	28	421	38	0	178_2	0
178	H	1	2	same pool	28th	11	28-Nov	16	28	421	39	0	178_2	0
178	H	1	2	same pool	28th	11	28-Nov	16	28	421	40	0	178_2	0
178	H	1	2	same pool	28th	11	28-Nov	16	28	421	41	0	178_2	0
178	H	1	2	same pool	28th	11	28-Nov	16	28	421	42	0	178_2	0
178	H	1	2	same pool	28th	11	28-Nov	16	28	421	43	0	178_2	0
178	H	1	2	same pool	28th	11	28-Nov	16	28	421	44	0	178_2	0
178	H	1	2	same pool	28th	11	28-Nov	16	28	421	45	0	178_2	0
178	H	1	2	same pool	28th	11	28-Nov	16	28	421	46	0	178_2	0
178	H	1	2	same pool	28th	11	28-Nov	16	28	421	47	0	178_2	0
178	H	1	2	same pool	28th	11	28-Nov	16	28	421	48	0	178_2	0
178	H	1	2	same pool	28th	11	28-Nov	16	28	421	49	0	178_2	0
178	H	1	2	same pool	28th	11	28-Nov	16	28	421	50	0	178_2	0
178	H	1	2	same pool	28th	11	28-Nov	16	28	421	51	0	178_2	0
178	H	1	2	same pool	28th	11	28-Nov	16	28	421	52	0	178_2	0
178	H	1	2	same pool	28th	11	28-Nov	16	28	421	53	0	178_2	0
178	H	1	2	same pool	28th	11	28-Nov	16	28	421	54	0	178_2	0
178	H	1	2	same pool	28th	11	28-Nov	16	28	421	55	0	178_2	0
178	H	1	2	same pool	28th	11	28-Nov	16	28	421	56	0	178_2	0
178	H	1	2	same pool	28th	11	28-Nov	16	28	421	57	0	178_2	0
178	H	1	2	same pool	28th	11	28-Nov	16	28	421	58	0	178_2	0
178	H	1	2	same pool	28th	11	28-Nov	16	28	421	59	0	178_2	0
178	H	1	2	same pool	28th	11	28-Nov	16	28	421	60	0	178_2	0
182	H	1	1	pooled from 3	28th	11	28-Nov	16	28	480	1	0	182_1	0
182	H	1	1	pooled from 3	28th	11	28-Nov	16	28	480	2	0	182_1	0
182	H	1	1	pooled from 3	28th	11	28-Nov	16	28	480	3	0	182_1	0
182	H	1	1	pooled from 3	28th	11	28-Nov	16	28	480	4	5	182_1	1.041666667
182	H	1	1	pooled from 3	28th	11	28-Nov	16	28	480	5	2	182_1	0.416666667
182	H	1	1	pooled from 3	28th	11	28-Nov	16	28	480	6	2	182_1	0.416666667
182	H	1	1	pooled from 3	28th	11	28-Nov	16	28	480	7	3	182_1	0.625
182	H	1	1	pooled from 3	28th	11	28-Nov	16	28	480	8	8	182_1	1.666666667
182	H	1	1	pooled from 3	28th	11	28-Nov	16	28	480	9	40	182_1	8.333333333
182	H	1	1	pooled from 3	28th	11	28-Nov	16	28	480	10	46	182_1	9.583333333
182	H	1	1	pooled from 3	28th	11	28-Nov	16	28	480	11	47	182_1	9.791666667
182	H	1	1	pooled from 3	28th	11	28-Nov	16	28	480	12	33	182_1	6.875
182	H	1	1	pooled from 3	28th	11	28-Nov	16	28	480	13	40	182_1	8.333333333
182	H	1	1	pooled from 3	28th	11	28-Nov	16	28	480	14	39	182_1	8.125
182	H	1	1	pooled from 3	28th	11	28-Nov	16	28	480	15	24	182_1	5
182	H	1	1	pooled from 3	28th	11	28-Nov	16	28	480	16	48	182_1	10
182	H	1	1	pooled from 3	28th	11	28-Nov	16	28	480	17	12	182_1	2.5
182	H	1	1	pooled from 3	28th	11	28-Nov	16	28	480	18	17	182_1	3.541666667
182	H	1	1	pooled from 3	28th	11	28-Nov	16	28	480	19	0	182_1	0
182	H	1	1	pooled from 3	28th	11	28-Nov	16	28	480	20	0	182_1	0
182	H	1	1	pooled from 3	28th	11	28-Nov	16	28	480	21	0	182_1	0
182	H	1	1	pooled from 3	28th	11	28-Nov	16	28	480	22	0	182_1	0
182	H	1	1	pooled from 3	28th	11	28-Nov	16	28	480	23	57	182_1	11.875
182	H	1	1	pooled from 3	28th	11	28-Nov	16	28	480	24	0	182_1	0
182	H	1	1	pooled from 3	28th	11	28-Nov	16	28	480	25	0	182_1	0
182	H	1	1	pooled from 3	28th	11	28-Nov	16	28	480	26	0	182_1	0
182	H	1	1	pooled from 3	28th	11	28-Nov	16	28	480	27	0	182_1	0
182	H	1	1	pooled from 3	28th	11	28-Nov	16	28	480	28	0	182_1	0
182	H	1	1	pooled from 3	28th	11	28-Nov	16	28	480	29	0	182_1	0
182	H	1	1	pooled from 3	28th	11	28-Nov	16	28	480	30	0	182_1	0
182	H	1	1	pooled from 3	28th	11	28-Nov	16	28	480	31	0	182_1	0
182	H	1	1	pooled from 3	28th	11	28-Nov	16	28	480	32	0	182_1	0
182	H	1	1	pooled from 3	28th	11	28-Nov	16	28	480	33	0	182_1	0
182	H	1	1	pooled from 3	28th	11	28-Nov	16	28	480	34	0	182_1	0
182	H	1	1	pooled from 3	28th	11	28-Nov	16	28	480	35	0	182_1	0
182	H	1	1	pooled from 3	28th	11	28-Nov	16	28	480	36	54	182_1	11.25
182	H	1	1	pooled from 3	28th	11	28-Nov	16	28	480	37	0	182_1	0
182	H	1	1	pooled from 3	28th	11	28-Nov	16	28	480	38	0	182_1	0
182	H	1	1	pooled from 3	28th	11	28-Nov	16	28	480	39	0	182_1	0
182	H	1	1	pooled from 3	28th	11	28-Nov	16	28	480	40	1	182_1	0.208333333
182	H	1	1	pooled from 3	28th	11	28-Nov	16	28	480	41	0	182_1	0
182	H	1	1	pooled from 3	28th	11	28-Nov	16	28	480	42	0	182_1	0
182	H	1	1	pooled from 3	28th	11	28-Nov	16	28	480	43	2	182_1	0.416666667
182	H	1	1	pooled from 3	28th	11	28-Nov	16	28	480	44	0	182_1	0
182	H	1	1	pooled from 3	28th	11	28-Nov	16	28	480	45	0	182_1	0
182	H	1	1	pooled from 3	28th	11	28-Nov	16	28	480	46	0	182_1	0
182	H	1	1	pooled from 3	28th	11	28-Nov	16	28	480	47	0	182_1	0
182	H	1	1	pooled from 3	28th	11	28-Nov	16	28	480	48	0	182_1	0
182	H	1	1	pooled from 3	28th	11	28-Nov	16	28	480	49	0	182_1	0
182	H	1	1	pooled from 3	28th	11	28-Nov	16	28	480	50	0	182_1	0
182	H	1	1	pooled from 3	28th	11	28-Nov	16	28	480	51	0	182_1	0
182	H	1	1	pooled from 3	28th	11	28-Nov	16	28	480	52	0	182_1	0
182	H	1	1	pooled from 3	28th	11	28-Nov	16	28	480	53	0	182_1	0
182	H	1	1	pooled from 3	28th	11	28-Nov	16	28	480	54	0	182_1	0
182	H	1	1	pooled from 3	28th	11	28-Nov	16	28	480	55	0	182_1	0
182	H	1	1	pooled from 3	28th	11	28-Nov	16	28	480	56	0	182_1	0
182	H	1	1	pooled from 3	28th	11	28-Nov	16	28	480	57	0	182_1	0
182	H	1	1	pooled from 3	28th	11	28-Nov	16	28	480	58	0	182_1	0
182	H	1	1	pooled from 3	28th	11	28-Nov	16	28	480	59	0	182_1	0
182	H	1	1	pooled from 3	28th	11	28-Nov	16	28	480	60	0	182_1	0
182	H	1	2	same pool	28th	11	28-Nov	16	28	514	1	0	182_2	0
182	H	1	2	same pool	28th	11	28-Nov	16	28	514	2	0	182_2	0
182	H	1	2	same pool	28th	11	28-Nov	16	28	514	3	0	182_2	0
182	H	1	2	same pool	28th	11	28-Nov	16	28	514	4	1	182_2	0.194552529
182	H	1	2	same pool	28th	11	28-Nov	16	28	514	5	2	182_2	0.389105058
182	H	1	2	same pool	28th	11	28-Nov	16	28	514	6	0	182_2	0
182	H	1	2	same pool	28th	11	28-Nov	16	28	514	7	8	182_2	1.556420233
182	H	1	2	same pool	28th	11	28-Nov	16	28	514	8	15	182_2	2.918287938
182	H	1	2	same pool	28th	11	28-Nov	16	28	514	9	50	182_2	9.727626459
182	H	1	2	same pool	28th	11	28-Nov	16	28	514	10	18	182_2	3.501945525
182	H	1	2	same pool	28th	11	28-Nov	16	28	514	11	49	182_2	9.53307393
182	H	1	2	same pool	28th	11	28-Nov	16	28	514	12	79	182_2	15.36964981
182	H	1	2	same pool	28th	11	28-Nov	16	28	514	13	19	182_2	3.696498054
182	H	1	2	same pool	28th	11	28-Nov	16	28	514	14	61	182_2	11.86770428
182	H	1	2	same pool	28th	11	28-Nov	16	28	514	15	60	182_2	11.67315175
182	H	1	2	same pool	28th	11	28-Nov	16	28	514	16	29	182_2	5.642023346
182	H	1	2	same pool	28th	11	28-Nov	16	28	514	17	16	182_2	3.112840467
182	H	1	2	same pool	28th	11	28-Nov	16	28	514	18	24	182_2	4.6692607
182	H	1	2	same pool	28th	11	28-Nov	16	28	514	19	0	182_2	0
182	H	1	2	same pool	28th	11	28-Nov	16	28	514	20	0	182_2	0
182	H	1	2	same pool	28th	11	28-Nov	16	28	514	21	0	182_2	0
182	H	1	2	same pool	28th	11	28-Nov	16	28	514	22	0	182_2	0
182	H	1	2	same pool	28th	11	28-Nov	16	28	514	23	34	182_2	6.614785992
182	H	1	2	same pool	28th	11	28-Nov	16	28	514	24	0	182_2	0
182	H	1	2	same pool	28th	11	28-Nov	16	28	514	25	0	182_2	0
182	H	1	2	same pool	28th	11	28-Nov	16	28	514	26	0	182_2	0
182	H	1	2	same pool	28th	11	28-Nov	16	28	514	27	0	182_2	0
182	H	1	2	same pool	28th	11	28-Nov	16	28	514	28	0	182_2	0
182	H	1	2	same pool	28th	11	28-Nov	16	28	514	29	0	182_2	0
182	H	1	2	same pool	28th	11	28-Nov	16	28	514	30	0	182_2	0
182	H	1	2	same pool	28th	11	28-Nov	16	28	514	31	0	182_2	0
182	H	1	2	same pool	28th	11	28-Nov	16	28	514	32	0	182_2	0
182	H	1	2	same pool	28th	11	28-Nov	16	28	514	33	0	182_2	0
182	H	1	2	same pool	28th	11	28-Nov	16	28	514	34	0	182_2	0
182	H	1	2	same pool	28th	11	28-Nov	16	28	514	35	0	182_2	0
182	H	1	2	same pool	28th	11	28-Nov	16	28	514	36	48	182_2	9.338521401
182	H	1	2	same pool	28th	11	28-Nov	16	28	514	37	0	182_2	0
182	H	1	2	same pool	28th	11	28-Nov	16	28	514	38	0	182_2	0
182	H	1	2	same pool	28th	11	28-Nov	16	28	514	39	0	182_2	0
182	H	1	2	same pool	28th	11	28-Nov	16	28	514	40	1	182_2	0.194552529
182	H	1	2	same pool	28th	11	28-Nov	16	28	514	41	0	182_2	0
182	H	1	2	same pool	28th	11	28-Nov	16	28	514	42	0	182_2	0
182	H	1	2	same pool	28th	11	28-Nov	16	28	514	43	0	182_2	0
182	H	1	2	same pool	28th	11	28-Nov	16	28	514	44	0	182_2	0
182	H	1	2	same pool	28th	11	28-Nov	16	28	514	45	0	182_2	0
182	H	1	2	same pool	28th	11	28-Nov	16	28	514	46	0	182_2	0
182	H	1	2	same pool	28th	11	28-Nov	16	28	514	47	0	182_2	0
182	H	1	2	same pool	28th	11	28-Nov	16	28	514	48	0	182_2	0
182	H	1	2	same pool	28th	11	28-Nov	16	28	514	49	0	182_2	0
182	H	1	2	same pool	28th	11	28-Nov	16	28	514	50	0	182_2	0
182	H	1	2	same pool	28th	11	28-Nov	16	28	514	51	0	182_2	0
182	H	1	2	same pool	28th	11	28-Nov	16	28	514	52	0	182_2	0
182	H	1	2	same pool	28th	11	28-Nov	16	28	514	53	0	182_2	0
182	H	1	2	same pool	28th	11	28-Nov	16	28	514	54	0	182_2	0
182	H	1	2	same pool	28th	11	28-Nov	16	28	514	55	0	182_2	0
182	H	1	2	same pool	28th	11	28-Nov	16	28	514	56	0	182_2	0
182	H	1	2	same pool	28th	11	28-Nov	16	28	514	57	0	182_2	0
182	H	1	2	same pool	28th	11	28-Nov	16	28	514	58	0	182_2	0
182	H	1	2	same pool	28th	11	28-Nov	16	28	514	59	0	182_2	0
182	H	1	2	same pool	28th	11	28-Nov	16	28	514	60	0	182_2	0
194	L	1	1	pooled from 3	28th	11	28-Nov	16	28	588	1	0	194_1	0
194	L	1	1	pooled from 3	28th	11	28-Nov	16	28	588	2	0	194_1	0
194	L	1	1	pooled from 3	28th	11	28-Nov	16	28	588	3	88	194_1	14.96598639
194	L	1	1	pooled from 3	28th	11	28-Nov	16	28	588	4	398	194_1	67.68707483
194	L	1	1	pooled from 3	28th	11	28-Nov	16	28	588	5	84	194_1	14.28571429
194	L	1	1	pooled from 3	28th	11	28-Nov	16	28	588	6	13	194_1	2.210884354
194	L	1	1	pooled from 3	28th	11	28-Nov	16	28	588	7	3	194_1	0.510204082
194	L	1	1	pooled from 3	28th	11	28-Nov	16	28	588	8	0	194_1	0
194	L	1	1	pooled from 3	28th	11	28-Nov	16	28	588	9	1	194_1	0.170068027
194	L	1	1	pooled from 3	28th	11	28-Nov	16	28	588	10	0	194_1	0
194	L	1	1	pooled from 3	28th	11	28-Nov	16	28	588	11	1	194_1	0.170068027
194	L	1	1	pooled from 3	28th	11	28-Nov	16	28	588	12	0	194_1	0
194	L	1	1	pooled from 3	28th	11	28-Nov	16	28	588	13	0	194_1	0
194	L	1	1	pooled from 3	28th	11	28-Nov	16	28	588	14	0	194_1	0
194	L	1	1	pooled from 3	28th	11	28-Nov	16	28	588	15	0	194_1	0
194	L	1	1	pooled from 3	28th	11	28-Nov	16	28	588	16	0	194_1	0
194	L	1	1	pooled from 3	28th	11	28-Nov	16	28	588	17	0	194_1	0
194	L	1	1	pooled from 3	28th	11	28-Nov	16	28	588	18	0	194_1	0
194	L	1	1	pooled from 3	28th	11	28-Nov	16	28	588	19	0	194_1	0
194	L	1	1	pooled from 3	28th	11	28-Nov	16	28	588	20	0	194_1	0
194	L	1	1	pooled from 3	28th	11	28-Nov	16	28	588	21	0	194_1	0
194	L	1	1	pooled from 3	28th	11	28-Nov	16	28	588	22	0	194_1	0
194	L	1	1	pooled from 3	28th	11	28-Nov	16	28	588	23	0	194_1	0
194	L	1	1	pooled from 3	28th	11	28-Nov	16	28	588	24	0	194_1	0
194	L	1	1	pooled from 3	28th	11	28-Nov	16	28	588	25	0	194_1	0
194	L	1	1	pooled from 3	28th	11	28-Nov	16	28	588	26	0	194_1	0
194	L	1	1	pooled from 3	28th	11	28-Nov	16	28	588	27	0	194_1	0
194	L	1	1	pooled from 3	28th	11	28-Nov	16	28	588	28	0	194_1	0
194	L	1	1	pooled from 3	28th	11	28-Nov	16	28	588	29	0	194_1	0
194	L	1	1	pooled from 3	28th	11	28-Nov	16	28	588	30	0	194_1	0
194	L	1	1	pooled from 3	28th	11	28-Nov	16	28	588	31	0	194_1	0
194	L	1	1	pooled from 3	28th	11	28-Nov	16	28	588	32	0	194_1	0
194	L	1	1	pooled from 3	28th	11	28-Nov	16	28	588	33	0	194_1	0
194	L	1	1	pooled from 3	28th	11	28-Nov	16	28	588	34	0	194_1	0
194	L	1	1	pooled from 3	28th	11	28-Nov	16	28	588	35	0	194_1	0
194	L	1	1	pooled from 3	28th	11	28-Nov	16	28	588	36	0	194_1	0
194	L	1	1	pooled from 3	28th	11	28-Nov	16	28	588	37	0	194_1	0
194	L	1	1	pooled from 3	28th	11	28-Nov	16	28	588	38	0	194_1	0
194	L	1	1	pooled from 3	28th	11	28-Nov	16	28	588	39	0	194_1	0
194	L	1	1	pooled from 3	28th	11	28-Nov	16	28	588	40	0	194_1	0
194	L	1	1	pooled from 3	28th	11	28-Nov	16	28	588	41	0	194_1	0
194	L	1	1	pooled from 3	28th	11	28-Nov	16	28	588	42	0	194_1	0
194	L	1	1	pooled from 3	28th	11	28-Nov	16	28	588	43	0	194_1	0
194	L	1	1	pooled from 3	28th	11	28-Nov	16	28	588	44	0	194_1	0
194	L	1	1	pooled from 3	28th	11	28-Nov	16	28	588	45	0	194_1	0
194	L	1	1	pooled from 3	28th	11	28-Nov	16	28	588	46	0	194_1	0
194	L	1	1	pooled from 3	28th	11	28-Nov	16	28	588	47	0	194_1	0
194	L	1	1	pooled from 3	28th	11	28-Nov	16	28	588	48	0	194_1	0
194	L	1	1	pooled from 3	28th	11	28-Nov	16	28	588	49	0	194_1	0
194	L	1	1	pooled from 3	28th	11	28-Nov	16	28	588	50	0	194_1	0
194	L	1	1	pooled from 3	28th	11	28-Nov	16	28	588	51	0	194_1	0
194	L	1	1	pooled from 3	28th	11	28-Nov	16	28	588	52	0	194_1	0
194	L	1	1	pooled from 3	28th	11	28-Nov	16	28	588	53	0	194_1	0
194	L	1	1	pooled from 3	28th	11	28-Nov	16	28	588	54	0	194_1	0
194	L	1	1	pooled from 3	28th	11	28-Nov	16	28	588	55	0	194_1	0
194	L	1	1	pooled from 3	28th	11	28-Nov	16	28	588	56	0	194_1	0
194	L	1	1	pooled from 3	28th	11	28-Nov	16	28	588	57	0	194_1	0
194	L	1	1	pooled from 3	28th	11	28-Nov	16	28	588	58	0	194_1	0
194	L	1	1	pooled from 3	28th	11	28-Nov	16	28	588	59	0	194_1	0
194	L	1	1	pooled from 3	28th	11	28-Nov	16	28	588	60	0	194_1	0
194	L	1	2	same pool	28th	11	28-Nov	16	28	301	1	0	194_2	0
194	L	1	2	same pool	28th	11	28-Nov	16	28	301	2	0	194_2	0
194	L	1	2	same pool	28th	11	28-Nov	16	28	301	3	54	194_2	17.94019934
194	L	1	2	same pool	28th	11	28-Nov	16	28	301	4	195	194_2	64.78405316
194	L	1	2	same pool	28th	11	28-Nov	16	28	301	5	45	194_2	14.95016611
194	L	1	2	same pool	28th	11	28-Nov	16	28	301	6	5	194_2	1.661129568
194	L	1	2	same pool	28th	11	28-Nov	16	28	301	7	0	194_2	0
194	L	1	2	same pool	28th	11	28-Nov	16	28	301	8	2	194_2	0.664451827
194	L	1	2	same pool	28th	11	28-Nov	16	28	301	9	0	194_2	0
194	L	1	2	same pool	28th	11	28-Nov	16	28	301	10	0	194_2	0
194	L	1	2	same pool	28th	11	28-Nov	16	28	301	11	0	194_2	0
194	L	1	2	same pool	28th	11	28-Nov	16	28	301	12	0	194_2	0
194	L	1	2	same pool	28th	11	28-Nov	16	28	301	13	0	194_2	0
194	L	1	2	same pool	28th	11	28-Nov	16	28	301	14	0	194_2	0
194	L	1	2	same pool	28th	11	28-Nov	16	28	301	15	0	194_2	0
194	L	1	2	same pool	28th	11	28-Nov	16	28	301	16	0	194_2	0
194	L	1	2	same pool	28th	11	28-Nov	16	28	301	17	0	194_2	0
194	L	1	2	same pool	28th	11	28-Nov	16	28	301	18	0	194_2	0
194	L	1	2	same pool	28th	11	28-Nov	16	28	301	19	0	194_2	0
194	L	1	2	same pool	28th	11	28-Nov	16	28	301	20	0	194_2	0
194	L	1	2	same pool	28th	11	28-Nov	16	28	301	21	0	194_2	0
194	L	1	2	same pool	28th	11	28-Nov	16	28	301	22	0	194_2	0
194	L	1	2	same pool	28th	11	28-Nov	16	28	301	23	0	194_2	0
194	L	1	2	same pool	28th	11	28-Nov	16	28	301	24	0	194_2	0
194	L	1	2	same pool	28th	11	28-Nov	16	28	301	25	0	194_2	0
194	L	1	2	same pool	28th	11	28-Nov	16	28	301	26	0	194_2	0
194	L	1	2	same pool	28th	11	28-Nov	16	28	301	27	0	194_2	0
194	L	1	2	same pool	28th	11	28-Nov	16	28	301	28	0	194_2	0
194	L	1	2	same pool	28th	11	28-Nov	16	28	301	29	0	194_2	0
194	L	1	2	same pool	28th	11	28-Nov	16	28	301	30	0	194_2	0
194	L	1	2	same pool	28th	11	28-Nov	16	28	301	31	0	194_2	0
194	L	1	2	same pool	28th	11	28-Nov	16	28	301	32	0	194_2	0
194	L	1	2	same pool	28th	11	28-Nov	16	28	301	33	0	194_2	0
194	L	1	2	same pool	28th	11	28-Nov	16	28	301	34	0	194_2	0
194	L	1	2	same pool	28th	11	28-Nov	16	28	301	35	0	194_2	0
194	L	1	2	same pool	28th	11	28-Nov	16	28	301	36	0	194_2	0
194	L	1	2	same pool	28th	11	28-Nov	16	28	301	37	0	194_2	0
194	L	1	2	same pool	28th	11	28-Nov	16	28	301	38	0	194_2	0
194	L	1	2	same pool	28th	11	28-Nov	16	28	301	39	0	194_2	0
194	L	1	2	same pool	28th	11	28-Nov	16	28	301	40	0	194_2	0
194	L	1	2	same pool	28th	11	28-Nov	16	28	301	41	0	194_2	0
194	L	1	2	same pool	28th	11	28-Nov	16	28	301	42	0	194_2	0
194	L	1	2	same pool	28th	11	28-Nov	16	28	301	43	0	194_2	0
194	L	1	2	same pool	28th	11	28-Nov	16	28	301	44	0	194_2	0
194	L	1	2	same pool	28th	11	28-Nov	16	28	301	45	0	194_2	0
194	L	1	2	same pool	28th	11	28-Nov	16	28	301	46	0	194_2	0
194	L	1	2	same pool	28th	11	28-Nov	16	28	301	47	0	194_2	0
194	L	1	2	same pool	28th	11	28-Nov	16	28	301	48	0	194_2	0
194	L	1	2	same pool	28th	11	28-Nov	16	28	301	49	0	194_2	0
194	L	1	2	same pool	28th	11	28-Nov	16	28	301	50	0	194_2	0
194	L	1	2	same pool	28th	11	28-Nov	16	28	301	51	0	194_2	0
194	L	1	2	same pool	28th	11	28-Nov	16	28	301	52	0	194_2	0
194	L	1	2	same pool	28th	11	28-Nov	16	28	301	53	0	194_2	0
194	L	1	2	same pool	28th	11	28-Nov	16	28	301	54	0	194_2	0
194	L	1	2	same pool	28th	11	28-Nov	16	28	301	55	0	194_2	0
194	L	1	2	same pool	28th	11	28-Nov	16	28	301	56	0	194_2	0
194	L	1	2	same pool	28th	11	28-Nov	16	28	301	57	0	194_2	0
194	L	1	2	same pool	28th	11	28-Nov	16	28	301	58	0	194_2	0
194	L	1	2	same pool	28th	11	28-Nov	16	28	301	59	0	194_2	0
194	L	1	2	same pool	28th	11	28-Nov	16	28	301	60	0	194_2	0
203	L	1	1	pooled from 3	28th	11	28-Nov	16	28	818	1	0	203_1	0
203	L	1	1	pooled from 3	28th	11	28-Nov	16	28	818	2	266	203_1	32.51833741
203	L	1	1	pooled from 3	28th	11	28-Nov	16	28	818	3	532	203_1	65.03667482
203	L	1	1	pooled from 3	28th	11	28-Nov	16	28	818	4	15	203_1	1.833740831
203	L	1	1	pooled from 3	28th	11	28-Nov	16	28	818	5	1	203_1	0.122249389
203	L	1	1	pooled from 3	28th	11	28-Nov	16	28	818	6	0	203_1	0
203	L	1	1	pooled from 3	28th	11	28-Nov	16	28	818	7	2	203_1	0.244498778
203	L	1	1	pooled from 3	28th	11	28-Nov	16	28	818	8	0	203_1	0
203	L	1	1	pooled from 3	28th	11	28-Nov	16	28	818	9	1	203_1	0.122249389
203	L	1	1	pooled from 3	28th	11	28-Nov	16	28	818	10	0	203_1	0
203	L	1	1	pooled from 3	28th	11	28-Nov	16	28	818	11	1	203_1	0.122249389
203	L	1	1	pooled from 3	28th	11	28-Nov	16	28	818	12	0	203_1	0
203	L	1	1	pooled from 3	28th	11	28-Nov	16	28	818	13	0	203_1	0
203	L	1	1	pooled from 3	28th	11	28-Nov	16	28	818	14	0	203_1	0
203	L	1	1	pooled from 3	28th	11	28-Nov	16	28	818	15	0	203_1	0
203	L	1	1	pooled from 3	28th	11	28-Nov	16	28	818	16	0	203_1	0
203	L	1	1	pooled from 3	28th	11	28-Nov	16	28	818	17	0	203_1	0
203	L	1	1	pooled from 3	28th	11	28-Nov	16	28	818	18	0	203_1	0
203	L	1	1	pooled from 3	28th	11	28-Nov	16	28	818	19	0	203_1	0
203	L	1	1	pooled from 3	28th	11	28-Nov	16	28	818	20	0	203_1	0
203	L	1	1	pooled from 3	28th	11	28-Nov	16	28	818	21	0	203_1	0
203	L	1	1	pooled from 3	28th	11	28-Nov	16	28	818	22	0	203_1	0
203	L	1	1	pooled from 3	28th	11	28-Nov	16	28	818	23	0	203_1	0
203	L	1	1	pooled from 3	28th	11	28-Nov	16	28	818	24	0	203_1	0
203	L	1	1	pooled from 3	28th	11	28-Nov	16	28	818	25	0	203_1	0
203	L	1	1	pooled from 3	28th	11	28-Nov	16	28	818	26	0	203_1	0
203	L	1	1	pooled from 3	28th	11	28-Nov	16	28	818	27	0	203_1	0
203	L	1	1	pooled from 3	28th	11	28-Nov	16	28	818	28	0	203_1	0
203	L	1	1	pooled from 3	28th	11	28-Nov	16	28	818	29	0	203_1	0
203	L	1	1	pooled from 3	28th	11	28-Nov	16	28	818	30	0	203_1	0
203	L	1	1	pooled from 3	28th	11	28-Nov	16	28	818	31	0	203_1	0
203	L	1	1	pooled from 3	28th	11	28-Nov	16	28	818	32	0	203_1	0
203	L	1	1	pooled from 3	28th	11	28-Nov	16	28	818	33	0	203_1	0
203	L	1	1	pooled from 3	28th	11	28-Nov	16	28	818	34	0	203_1	0
203	L	1	1	pooled from 3	28th	11	28-Nov	16	28	818	35	0	203_1	0
203	L	1	1	pooled from 3	28th	11	28-Nov	16	28	818	36	0	203_1	0
203	L	1	1	pooled from 3	28th	11	28-Nov	16	28	818	37	0	203_1	0
203	L	1	1	pooled from 3	28th	11	28-Nov	16	28	818	38	0	203_1	0
203	L	1	1	pooled from 3	28th	11	28-Nov	16	28	818	39	0	203_1	0
203	L	1	1	pooled from 3	28th	11	28-Nov	16	28	818	40	0	203_1	0
203	L	1	1	pooled from 3	28th	11	28-Nov	16	28	818	41	0	203_1	0
203	L	1	1	pooled from 3	28th	11	28-Nov	16	28	818	42	0	203_1	0
203	L	1	1	pooled from 3	28th	11	28-Nov	16	28	818	43	0	203_1	0
203	L	1	1	pooled from 3	28th	11	28-Nov	16	28	818	44	0	203_1	0
203	L	1	1	pooled from 3	28th	11	28-Nov	16	28	818	45	0	203_1	0
203	L	1	1	pooled from 3	28th	11	28-Nov	16	28	818	46	0	203_1	0
203	L	1	1	pooled from 3	28th	11	28-Nov	16	28	818	47	0	203_1	0
203	L	1	1	pooled from 3	28th	11	28-Nov	16	28	818	48	0	203_1	0
203	L	1	1	pooled from 3	28th	11	28-Nov	16	28	818	49	0	203_1	0
203	L	1	1	pooled from 3	28th	11	28-Nov	16	28	818	50	0	203_1	0
203	L	1	1	pooled from 3	28th	11	28-Nov	16	28	818	51	0	203_1	0
203	L	1	1	pooled from 3	28th	11	28-Nov	16	28	818	52	0	203_1	0
203	L	1	1	pooled from 3	28th	11	28-Nov	16	28	818	53	0	203_1	0
203	L	1	1	pooled from 3	28th	11	28-Nov	16	28	818	54	0	203_1	0
203	L	1	1	pooled from 3	28th	11	28-Nov	16	28	818	55	0	203_1	0
203	L	1	1	pooled from 3	28th	11	28-Nov	16	28	818	56	0	203_1	0
203	L	1	1	pooled from 3	28th	11	28-Nov	16	28	818	57	0	203_1	0
203	L	1	1	pooled from 3	28th	11	28-Nov	16	28	818	58	0	203_1	0
203	L	1	1	pooled from 3	28th	11	28-Nov	16	28	818	59	0	203_1	0
203	L	1	1	pooled from 3	28th	11	28-Nov	16	28	818	60	0	203_1	0
203	L	1	2	same pool	28th	11	28-Nov	16	28	413	1	0	203_2	0
203	L	1	2	same pool	28th	11	28-Nov	16	28	413	2	112	203_2	27.11864407
203	L	1	2	same pool	28th	11	28-Nov	16	28	413	3	224	203_2	54.23728814
203	L	1	2	same pool	28th	11	28-Nov	16	28	413	4	62	203_2	15.01210654
203	L	1	2	same pool	28th	11	28-Nov	16	28	413	5	5	203_2	1.210653753
203	L	1	2	same pool	28th	11	28-Nov	16	28	413	6	0	203_2	0
203	L	1	2	same pool	28th	11	28-Nov	16	28	413	7	8	203_2	1.937046005
203	L	1	2	same pool	28th	11	28-Nov	16	28	413	8	1	203_2	0.242130751
203	L	1	2	same pool	28th	11	28-Nov	16	28	413	9	0	203_2	0
203	L	1	2	same pool	28th	11	28-Nov	16	28	413	10	0	203_2	0
203	L	1	2	same pool	28th	11	28-Nov	16	28	413	11	0	203_2	0
203	L	1	2	same pool	28th	11	28-Nov	16	28	413	12	1	203_2	0.242130751
203	L	1	2	same pool	28th	11	28-Nov	16	28	413	13	0	203_2	0
203	L	1	2	same pool	28th	11	28-Nov	16	28	413	14	0	203_2	0
203	L	1	2	same pool	28th	11	28-Nov	16	28	413	15	0	203_2	0
203	L	1	2	same pool	28th	11	28-Nov	16	28	413	16	0	203_2	0
203	L	1	2	same pool	28th	11	28-Nov	16	28	413	17	0	203_2	0
203	L	1	2	same pool	28th	11	28-Nov	16	28	413	18	0	203_2	0
203	L	1	2	same pool	28th	11	28-Nov	16	28	413	19	0	203_2	0
203	L	1	2	same pool	28th	11	28-Nov	16	28	413	20	0	203_2	0
203	L	1	2	same pool	28th	11	28-Nov	16	28	413	21	0	203_2	0
203	L	1	2	same pool	28th	11	28-Nov	16	28	413	22	0	203_2	0
203	L	1	2	same pool	28th	11	28-Nov	16	28	413	23	0	203_2	0
203	L	1	2	same pool	28th	11	28-Nov	16	28	413	24	0	203_2	0
203	L	1	2	same pool	28th	11	28-Nov	16	28	413	25	0	203_2	0
203	L	1	2	same pool	28th	11	28-Nov	16	28	413	26	0	203_2	0
203	L	1	2	same pool	28th	11	28-Nov	16	28	413	27	0	203_2	0
203	L	1	2	same pool	28th	11	28-Nov	16	28	413	28	0	203_2	0
203	L	1	2	same pool	28th	11	28-Nov	16	28	413	29	0	203_2	0
203	L	1	2	same pool	28th	11	28-Nov	16	28	413	30	0	203_2	0
203	L	1	2	same pool	28th	11	28-Nov	16	28	413	31	0	203_2	0
203	L	1	2	same pool	28th	11	28-Nov	16	28	413	32	0	203_2	0
203	L	1	2	same pool	28th	11	28-Nov	16	28	413	33	0	203_2	0
203	L	1	2	same pool	28th	11	28-Nov	16	28	413	34	0	203_2	0
203	L	1	2	same pool	28th	11	28-Nov	16	28	413	35	0	203_2	0
203	L	1	2	same pool	28th	11	28-Nov	16	28	413	36	0	203_2	0
203	L	1	2	same pool	28th	11	28-Nov	16	28	413	37	0	203_2	0
203	L	1	2	same pool	28th	11	28-Nov	16	28	413	38	0	203_2	0
203	L	1	2	same pool	28th	11	28-Nov	16	28	413	39	0	203_2	0
203	L	1	2	same pool	28th	11	28-Nov	16	28	413	40	0	203_2	0
203	L	1	2	same pool	28th	11	28-Nov	16	28	413	41	0	203_2	0
203	L	1	2	same pool	28th	11	28-Nov	16	28	413	42	0	203_2	0
203	L	1	2	same pool	28th	11	28-Nov	16	28	413	43	0	203_2	0
203	L	1	2	same pool	28th	11	28-Nov	16	28	413	44	0	203_2	0
203	L	1	2	same pool	28th	11	28-Nov	16	28	413	45	0	203_2	0
203	L	1	2	same pool	28th	11	28-Nov	16	28	413	46	0	203_2	0
203	L	1	2	same pool	28th	11	28-Nov	16	28	413	47	0	203_2	0
203	L	1	2	same pool	28th	11	28-Nov	16	28	413	48	0	203_2	0
203	L	1	2	same pool	28th	11	28-Nov	16	28	413	49	0	203_2	0
203	L	1	2	same pool	28th	11	28-Nov	16	28	413	50	0	203_2	0
203	L	1	2	same pool	28th	11	28-Nov	16	28	413	51	0	203_2	0
203	L	1	2	same pool	28th	11	28-Nov	16	28	413	52	0	203_2	0
203	L	1	2	same pool	28th	11	28-Nov	16	28	413	53	0	203_2	0
203	L	1	2	same pool	28th	11	28-Nov	16	28	413	54	0	203_2	0
203	L	1	2	same pool	28th	11	28-Nov	16	28	413	55	0	203_2	0
203	L	1	2	same pool	28th	11	28-Nov	16	28	413	56	0	203_2	0
203	L	1	2	same pool	28th	11	28-Nov	16	28	413	57	0	203_2	0
203	L	1	2	same pool	28th	11	28-Nov	16	28	413	58	0	203_2	0
203	L	1	2	same pool	28th	11	28-Nov	16	28	413	59	0	203_2	0
203	L	1	2	same pool	28th	11	28-Nov	16	28	413	60	0	203_2	0
311	H	1	1	pooled from 3	28th	11	28-Nov	16	28	613	1	0	311_1	0
311	H	1	1	pooled from 3	28th	11	28-Nov	16	28	613	2	0	311_1	0
311	H	1	1	pooled from 3	28th	11	28-Nov	16	28	613	3	35	311_1	5.709624796
311	H	1	1	pooled from 3	28th	11	28-Nov	16	28	613	4	319	311_1	52.03915171
311	H	1	1	pooled from 3	28th	11	28-Nov	16	28	613	5	173	311_1	28.22185971
311	H	1	1	pooled from 3	28th	11	28-Nov	16	28	613	6	46	311_1	7.504078303
311	H	1	1	pooled from 3	28th	11	28-Nov	16	28	613	7	18	311_1	2.936378467
311	H	1	1	pooled from 3	28th	11	28-Nov	16	28	613	8	7	311_1	1.141924959
311	H	1	1	pooled from 3	28th	11	28-Nov	16	28	613	9	10	311_1	1.63132137
311	H	1	1	pooled from 3	28th	11	28-Nov	16	28	613	10	4	311_1	0.652528548
311	H	1	1	pooled from 3	28th	11	28-Nov	16	28	613	11	0	311_1	0
311	H	1	1	pooled from 3	28th	11	28-Nov	16	28	613	12	0	311_1	0
311	H	1	1	pooled from 3	28th	11	28-Nov	16	28	613	13	0	311_1	0
311	H	1	1	pooled from 3	28th	11	28-Nov	16	28	613	14	0	311_1	0
311	H	1	1	pooled from 3	28th	11	28-Nov	16	28	613	15	1	311_1	0.163132137
311	H	1	1	pooled from 3	28th	11	28-Nov	16	28	613	16	0	311_1	0
311	H	1	1	pooled from 3	28th	11	28-Nov	16	28	613	17	0	311_1	0
311	H	1	1	pooled from 3	28th	11	28-Nov	16	28	613	18	0	311_1	0
311	H	1	1	pooled from 3	28th	11	28-Nov	16	28	613	19	0	311_1	0
311	H	1	1	pooled from 3	28th	11	28-Nov	16	28	613	20	0	311_1	0
311	H	1	1	pooled from 3	28th	11	28-Nov	16	28	613	21	0	311_1	0
311	H	1	1	pooled from 3	28th	11	28-Nov	16	28	613	22	0	311_1	0
311	H	1	1	pooled from 3	28th	11	28-Nov	16	28	613	23	0	311_1	0
311	H	1	1	pooled from 3	28th	11	28-Nov	16	28	613	24	0	311_1	0
311	H	1	1	pooled from 3	28th	11	28-Nov	16	28	613	25	0	311_1	0
311	H	1	1	pooled from 3	28th	11	28-Nov	16	28	613	26	0	311_1	0
311	H	1	1	pooled from 3	28th	11	28-Nov	16	28	613	27	0	311_1	0
311	H	1	1	pooled from 3	28th	11	28-Nov	16	28	613	28	0	311_1	0
311	H	1	1	pooled from 3	28th	11	28-Nov	16	28	613	29	0	311_1	0
311	H	1	1	pooled from 3	28th	11	28-Nov	16	28	613	30	0	311_1	0
311	H	1	1	pooled from 3	28th	11	28-Nov	16	28	613	31	0	311_1	0
311	H	1	1	pooled from 3	28th	11	28-Nov	16	28	613	32	0	311_1	0
311	H	1	1	pooled from 3	28th	11	28-Nov	16	28	613	33	0	311_1	0
311	H	1	1	pooled from 3	28th	11	28-Nov	16	28	613	34	0	311_1	0
311	H	1	1	pooled from 3	28th	11	28-Nov	16	28	613	35	0	311_1	0
311	H	1	1	pooled from 3	28th	11	28-Nov	16	28	613	36	0	311_1	0
311	H	1	1	pooled from 3	28th	11	28-Nov	16	28	613	37	0	311_1	0
311	H	1	1	pooled from 3	28th	11	28-Nov	16	28	613	38	0	311_1	0
311	H	1	1	pooled from 3	28th	11	28-Nov	16	28	613	39	0	311_1	0
311	H	1	1	pooled from 3	28th	11	28-Nov	16	28	613	40	0	311_1	0
311	H	1	1	pooled from 3	28th	11	28-Nov	16	28	613	41	0	311_1	0
311	H	1	1	pooled from 3	28th	11	28-Nov	16	28	613	42	0	311_1	0
311	H	1	1	pooled from 3	28th	11	28-Nov	16	28	613	43	0	311_1	0
311	H	1	1	pooled from 3	28th	11	28-Nov	16	28	613	44	0	311_1	0
311	H	1	1	pooled from 3	28th	11	28-Nov	16	28	613	45	0	311_1	0
311	H	1	1	pooled from 3	28th	11	28-Nov	16	28	613	46	0	311_1	0
311	H	1	1	pooled from 3	28th	11	28-Nov	16	28	613	47	0	311_1	0
311	H	1	1	pooled from 3	28th	11	28-Nov	16	28	613	48	0	311_1	0
311	H	1	1	pooled from 3	28th	11	28-Nov	16	28	613	49	0	311_1	0
311	H	1	1	pooled from 3	28th	11	28-Nov	16	28	613	50	0	311_1	0
311	H	1	1	pooled from 3	28th	11	28-Nov	16	28	613	51	0	311_1	0
311	H	1	1	pooled from 3	28th	11	28-Nov	16	28	613	52	0	311_1	0
311	H	1	1	pooled from 3	28th	11	28-Nov	16	28	613	53	0	311_1	0
311	H	1	1	pooled from 3	28th	11	28-Nov	16	28	613	54	0	311_1	0
311	H	1	1	pooled from 3	28th	11	28-Nov	16	28	613	55	0	311_1	0
311	H	1	1	pooled from 3	28th	11	28-Nov	16	28	613	56	0	311_1	0
311	H	1	1	pooled from 3	28th	11	28-Nov	16	28	613	57	0	311_1	0
311	H	1	1	pooled from 3	28th	11	28-Nov	16	28	613	58	0	311_1	0
311	H	1	1	pooled from 3	28th	11	28-Nov	16	28	613	59	0	311_1	0
311	H	1	1	pooled from 3	28th	11	28-Nov	16	28	613	60	0	311_1	0
311	H	1	2	same pool	28th	11	28-Nov	16	28	440	1	0	311_2	0
311	H	1	2	same pool	28th	11	28-Nov	16	28	440	2	0	311_2	0
311	H	1	2	same pool	28th	11	28-Nov	16	28	440	3	7	311_2	1.590909091
311	H	1	2	same pool	28th	11	28-Nov	16	28	440	4	180	311_2	40.90909091
311	H	1	2	same pool	28th	11	28-Nov	16	28	440	5	178	311_2	40.45454545
311	H	1	2	same pool	28th	11	28-Nov	16	28	440	6	57	311_2	12.95454545
311	H	1	2	same pool	28th	11	28-Nov	16	28	440	7	9	311_2	2.045454545
311	H	1	2	same pool	28th	11	28-Nov	16	28	440	8	5	311_2	1.136363636
311	H	1	2	same pool	28th	11	28-Nov	16	28	440	9	2	311_2	0.454545455
311	H	1	2	same pool	28th	11	28-Nov	16	28	440	10	2	311_2	0.454545455
311	H	1	2	same pool	28th	11	28-Nov	16	28	440	11	0	311_2	0
311	H	1	2	same pool	28th	11	28-Nov	16	28	440	12	0	311_2	0
311	H	1	2	same pool	28th	11	28-Nov	16	28	440	13	0	311_2	0
311	H	1	2	same pool	28th	11	28-Nov	16	28	440	14	0	311_2	0
311	H	1	2	same pool	28th	11	28-Nov	16	28	440	15	0	311_2	0
311	H	1	2	same pool	28th	11	28-Nov	16	28	440	16	0	311_2	0
311	H	1	2	same pool	28th	11	28-Nov	16	28	440	17	0	311_2	0
311	H	1	2	same pool	28th	11	28-Nov	16	28	440	18	0	311_2	0
311	H	1	2	same pool	28th	11	28-Nov	16	28	440	19	0	311_2	0
311	H	1	2	same pool	28th	11	28-Nov	16	28	440	20	0	311_2	0
311	H	1	2	same pool	28th	11	28-Nov	16	28	440	21	0	311_2	0
311	H	1	2	same pool	28th	11	28-Nov	16	28	440	22	0	311_2	0
311	H	1	2	same pool	28th	11	28-Nov	16	28	440	23	0	311_2	0
311	H	1	2	same pool	28th	11	28-Nov	16	28	440	24	0	311_2	0
311	H	1	2	same pool	28th	11	28-Nov	16	28	440	25	0	311_2	0
311	H	1	2	same pool	28th	11	28-Nov	16	28	440	26	0	311_2	0
311	H	1	2	same pool	28th	11	28-Nov	16	28	440	27	0	311_2	0
311	H	1	2	same pool	28th	11	28-Nov	16	28	440	28	0	311_2	0
311	H	1	2	same pool	28th	11	28-Nov	16	28	440	29	0	311_2	0
311	H	1	2	same pool	28th	11	28-Nov	16	28	440	30	0	311_2	0
311	H	1	2	same pool	28th	11	28-Nov	16	28	440	31	0	311_2	0
311	H	1	2	same pool	28th	11	28-Nov	16	28	440	32	0	311_2	0
311	H	1	2	same pool	28th	11	28-Nov	16	28	440	33	0	311_2	0
311	H	1	2	same pool	28th	11	28-Nov	16	28	440	34	0	311_2	0
311	H	1	2	same pool	28th	11	28-Nov	16	28	440	35	0	311_2	0
311	H	1	2	same pool	28th	11	28-Nov	16	28	440	36	0	311_2	0
311	H	1	2	same pool	28th	11	28-Nov	16	28	440	37	0	311_2	0
311	H	1	2	same pool	28th	11	28-Nov	16	28	440	38	0	311_2	0
311	H	1	2	same pool	28th	11	28-Nov	16	28	440	39	0	311_2	0
311	H	1	2	same pool	28th	11	28-Nov	16	28	440	40	0	311_2	0
311	H	1	2	same pool	28th	11	28-Nov	16	28	440	41	0	311_2	0
311	H	1	2	same pool	28th	11	28-Nov	16	28	440	42	0	311_2	0
311	H	1	2	same pool	28th	11	28-Nov	16	28	440	43	0	311_2	0
311	H	1	2	same pool	28th	11	28-Nov	16	28	440	44	0	311_2	0
311	H	1	2	same pool	28th	11	28-Nov	16	28	440	45	0	311_2	0
311	H	1	2	same pool	28th	11	28-Nov	16	28	440	46	0	311_2	0
311	H	1	2	same pool	28th	11	28-Nov	16	28	440	47	0	311_2	0
311	H	1	2	same pool	28th	11	28-Nov	16	28	440	48	0	311_2	0
311	H	1	2	same pool	28th	11	28-Nov	16	28	440	49	0	311_2	0
311	H	1	2	same pool	28th	11	28-Nov	16	28	440	50	0	311_2	0
311	H	1	2	same pool	28th	11	28-Nov	16	28	440	51	0	311_2	0
311	H	1	2	same pool	28th	11	28-Nov	16	28	440	52	0	311_2	0
311	H	1	2	same pool	28th	11	28-Nov	16	28	440	53	0	311_2	0
311	H	1	2	same pool	28th	11	28-Nov	16	28	440	54	0	311_2	0
311	H	1	2	same pool	28th	11	28-Nov	16	28	440	55	0	311_2	0
311	H	1	2	same pool	28th	11	28-Nov	16	28	440	56	0	311_2	0
311	H	1	2	same pool	28th	11	28-Nov	16	28	440	57	0	311_2	0
311	H	1	2	same pool	28th	11	28-Nov	16	28	440	58	0	311_2	0
311	H	1	2	same pool	28th	11	28-Nov	16	28	440	59	0	311_2	0
311	H	1	2	same pool	28th	11	28-Nov	16	28	440	60	0	311_2	0
Col-0	L	2	1	pooled from 3	1	9	1-Sep	2018	41	1131	1	0	Col-0_1	0
Col-0	L	2	1	pooled from 3	1	9	1-Sep	2018	41	1131	2	0	Col-0_1	0
Col-0	L	2	1	pooled from 3	1	9	1-Sep	2018	41	1131	3	643	Col-0_1	56.85234306
Col-0	L	2	1	pooled from 3	1	9	1-Sep	2018	41	1131	4	429	Col-0_1	37.93103448
Col-0	L	2	1	pooled from 3	1	9	1-Sep	2018	41	1131	5	29	Col-0_1	2.564102564
Col-0	L	2	1	pooled from 3	1	9	1-Sep	2018	41	1131	6	9	Col-0_1	0.795755968
Col-0	L	2	1	pooled from 3	1	9	1-Sep	2018	41	1131	7	3	Col-0_1	0.265251989
Col-0	L	2	1	pooled from 3	1	9	1-Sep	2018	41	1131	8	4	Col-0_1	0.353669319
Col-0	L	2	1	pooled from 3	1	9	1-Sep	2018	41	1131	9	3	Col-0_1	0.265251989
Col-0	L	2	1	pooled from 3	1	9	1-Sep	2018	41	1131	10	3	Col-0_1	0.265251989
Col-0	L	2	1	pooled from 3	1	9	1-Sep	2018	41	1131	11	4	Col-0_1	0.353669319
Col-0	L	2	1	pooled from 3	1	9	1-Sep	2018	41	1131	12	0	Col-0_1	0
Col-0	L	2	1	pooled from 3	1	9	1-Sep	2018	41	1131	13	0	Col-0_1	0
Col-0	L	2	1	pooled from 3	1	9	1-Sep	2018	41	1131	14	2	Col-0_1	0.17683466
Col-0	L	2	1	pooled from 3	1	9	1-Sep	2018	41	1131	15	0	Col-0_1	0
Col-0	L	2	1	pooled from 3	1	9	1-Sep	2018	41	1131	16	0	Col-0_1	0
Col-0	L	2	1	pooled from 3	1	9	1-Sep	2018	41	1131	17	1	Col-0_1	0.08841733
Col-0	L	2	1	pooled from 3	1	9	1-Sep	2018	41	1131	18	0	Col-0_1	0
Col-0	L	2	1	pooled from 3	1	9	1-Sep	2018	41	1131	19	0	Col-0_1	0
Col-0	L	2	1	pooled from 3	1	9	1-Sep	2018	41	1131	20	0	Col-0_1	0
Col-0	L	2	1	pooled from 3	1	9	1-Sep	2018	41	1131	21	0	Col-0_1	0
Col-0	L	2	1	pooled from 3	1	9	1-Sep	2018	41	1131	22	0	Col-0_1	0
Col-0	L	2	1	pooled from 3	1	9	1-Sep	2018	41	1131	23	0	Col-0_1	0
Col-0	L	2	1	pooled from 3	1	9	1-Sep	2018	41	1131	24	0	Col-0_1	0
Col-0	L	2	1	pooled from 3	1	9	1-Sep	2018	41	1131	25	0	Col-0_1	0
Col-0	L	2	1	pooled from 3	1	9	1-Sep	2018	41	1131	26	0	Col-0_1	0
Col-0	L	2	1	pooled from 3	1	9	1-Sep	2018	41	1131	27	0	Col-0_1	0
Col-0	L	2	1	pooled from 3	1	9	1-Sep	2018	41	1131	28	0	Col-0_1	0
Col-0	L	2	1	pooled from 3	1	9	1-Sep	2018	41	1131	29	0	Col-0_1	0
Col-0	L	2	1	pooled from 3	1	9	1-Sep	2018	41	1131	30	0	Col-0_1	0
Col-0	L	2	1	pooled from 3	1	9	1-Sep	2018	41	1131	31	1	Col-0_1	0.08841733
Col-0	L	2	1	pooled from 3	1	9	1-Sep	2018	41	1131	32	0	Col-0_1	0
Col-0	L	2	1	pooled from 3	1	9	1-Sep	2018	41	1131	33	0	Col-0_1	0
Col-0	L	2	1	pooled from 3	1	9	1-Sep	2018	41	1131	34	0	Col-0_1	0
Col-0	L	2	1	pooled from 3	1	9	1-Sep	2018	41	1131	35	0	Col-0_1	0
Col-0	L	2	1	pooled from 3	1	9	1-Sep	2018	41	1131	36	0	Col-0_1	0
Col-0	L	2	1	pooled from 3	1	9	1-Sep	2018	41	1131	37	0	Col-0_1	0
Col-0	L	2	1	pooled from 3	1	9	1-Sep	2018	41	1131	38	0	Col-0_1	0
Col-0	L	2	1	pooled from 3	1	9	1-Sep	2018	41	1131	39	0	Col-0_1	0
Col-0	L	2	1	pooled from 3	1	9	1-Sep	2018	41	1131	40	0	Col-0_1	0
Col-0	L	2	1	pooled from 3	1	9	1-Sep	2018	41	1131	41	0	Col-0_1	0
Col-0	L	2	1	pooled from 3	1	9	1-Sep	2018	41	1131	42	0	Col-0_1	0
Col-0	L	2	1	pooled from 3	1	9	1-Sep	2018	41	1131	43	0	Col-0_1	0
Col-0	L	2	1	pooled from 3	1	9	1-Sep	2018	41	1131	44	0	Col-0_1	0
Col-0	L	2	1	pooled from 3	1	9	1-Sep	2018	41	1131	45	0	Col-0_1	0
Col-0	L	2	1	pooled from 3	1	9	1-Sep	2018	41	1131	46	0	Col-0_1	0
Col-0	L	2	1	pooled from 3	1	9	1-Sep	2018	41	1131	47	0	Col-0_1	0
Col-0	L	2	1	pooled from 3	1	9	1-Sep	2018	41	1131	48	0	Col-0_1	0
Col-0	L	2	1	pooled from 3	1	9	1-Sep	2018	41	1131	49	0	Col-0_1	0
Col-0	L	2	1	pooled from 3	1	9	1-Sep	2018	41	1131	50	0	Col-0_1	0
Col-0	L	2	1	pooled from 3	1	9	1-Sep	2018	41	1131	51	0	Col-0_1	0
Col-0	L	2	1	pooled from 3	1	9	1-Sep	2018	41	1131	52	0	Col-0_1	0
Col-0	L	2	1	pooled from 3	1	9	1-Sep	2018	41	1131	53	0	Col-0_1	0
Col-0	L	2	1	pooled from 3	1	9	1-Sep	2018	41	1131	54	0	Col-0_1	0
Col-0	L	2	1	pooled from 3	1	9	1-Sep	2018	41	1131	55	0	Col-0_1	0
Col-0	L	2	1	pooled from 3	1	9	1-Sep	2018	41	1131	56	0	Col-0_1	0
Col-0	L	2	1	pooled from 3	1	9	1-Sep	2018	41	1131	57	0	Col-0_1	0
Col-0	L	2	1	pooled from 3	1	9	1-Sep	2018	41	1131	58	0	Col-0_1	0
Col-0	L	2	1	pooled from 3	1	9	1-Sep	2018	41	1131	59	0	Col-0_1	0
Col-0	L	2	1	pooled from 3	1	9	1-Sep	2018	41	1131	60	0	Col-0_1	0
No-0	H	2	1	pooled from 3	1	9	1-Sep	2018	35	1071	1	0	No-0_1	0
No-0	H	2	1	pooled from 3	1	9	1-Sep	2018	35	1071	2	0	No-0_1	0
No-0	H	2	1	pooled from 3	1	9	1-Sep	2018	35	1071	3	16	No-0_1	1.493930906
No-0	H	2	1	pooled from 3	1	9	1-Sep	2018	35	1071	4	660	No-0_1	61.62464986
No-0	H	2	1	pooled from 3	1	9	1-Sep	2018	35	1071	5	153	No-0_1	14.28571429
No-0	H	2	1	pooled from 3	1	9	1-Sep	2018	35	1071	6	81	No-0_1	7.56302521
No-0	H	2	1	pooled from 3	1	9	1-Sep	2018	35	1071	7	62	No-0_1	5.78898226
No-0	H	2	1	pooled from 3	1	9	1-Sep	2018	35	1071	8	18	No-0_1	1.680672269
No-0	H	2	1	pooled from 3	1	9	1-Sep	2018	35	1071	9	18	No-0_1	1.680672269
No-0	H	2	1	pooled from 3	1	9	1-Sep	2018	35	1071	10	18	No-0_1	1.680672269
No-0	H	2	1	pooled from 3	1	9	1-Sep	2018	35	1071	11	13	No-0_1	1.213818861
No-0	H	2	1	pooled from 3	1	9	1-Sep	2018	35	1071	12	4	No-0_1	0.373482726
No-0	H	2	1	pooled from 3	1	9	1-Sep	2018	35	1071	13	3	No-0_1	0.280112045
No-0	H	2	1	pooled from 3	1	9	1-Sep	2018	35	1071	14	3	No-0_1	0.280112045
No-0	H	2	1	pooled from 3	1	9	1-Sep	2018	35	1071	15	3	No-0_1	0.280112045
No-0	H	2	1	pooled from 3	1	9	1-Sep	2018	35	1071	16	2	No-0_1	0.186741363
No-0	H	2	1	pooled from 3	1	9	1-Sep	2018	35	1071	17	2	No-0_1	0.186741363
No-0	H	2	1	pooled from 3	1	9	1-Sep	2018	35	1071	18	0	No-0_1	0
No-0	H	2	1	pooled from 3	1	9	1-Sep	2018	35	1071	19	0	No-0_1	0
No-0	H	2	1	pooled from 3	1	9	1-Sep	2018	35	1071	20	0	No-0_1	0
No-0	H	2	1	pooled from 3	1	9	1-Sep	2018	35	1071	21	0	No-0_1	0
No-0	H	2	1	pooled from 3	1	9	1-Sep	2018	35	1071	22	0	No-0_1	0
No-0	H	2	1	pooled from 3	1	9	1-Sep	2018	35	1071	23	0	No-0_1	0
No-0	H	2	1	pooled from 3	1	9	1-Sep	2018	35	1071	24	1	No-0_1	0.093370682
No-0	H	2	1	pooled from 3	1	9	1-Sep	2018	35	1071	25	0	No-0_1	0
No-0	H	2	1	pooled from 3	1	9	1-Sep	2018	35	1071	26	0	No-0_1	0
No-0	H	2	1	pooled from 3	1	9	1-Sep	2018	35	1071	27	0	No-0_1	0
No-0	H	2	1	pooled from 3	1	9	1-Sep	2018	35	1071	28	0	No-0_1	0
No-0	H	2	1	pooled from 3	1	9	1-Sep	2018	35	1071	29	0	No-0_1	0
No-0	H	2	1	pooled from 3	1	9	1-Sep	2018	35	1071	30	0	No-0_1	0
No-0	H	2	1	pooled from 3	1	9	1-Sep	2018	35	1071	31	0	No-0_1	0
No-0	H	2	1	pooled from 3	1	9	1-Sep	2018	35	1071	32	0	No-0_1	0
No-0	H	2	1	pooled from 3	1	9	1-Sep	2018	35	1071	33	0	No-0_1	0
No-0	H	2	1	pooled from 3	1	9	1-Sep	2018	35	1071	34	0	No-0_1	0
No-0	H	2	1	pooled from 3	1	9	1-Sep	2018	35	1071	35	0	No-0_1	0
No-0	H	2	1	pooled from 3	1	9	1-Sep	2018	35	1071	36	0	No-0_1	0
No-0	H	2	1	pooled from 3	1	9	1-Sep	2018	35	1071	37	1	No-0_1	0.093370682
No-0	H	2	1	pooled from 3	1	9	1-Sep	2018	35	1071	38	1	No-0_1	0.093370682
No-0	H	2	1	pooled from 3	1	9	1-Sep	2018	35	1071	39	0	No-0_1	0
No-0	H	2	1	pooled from 3	1	9	1-Sep	2018	35	1071	40	0	No-0_1	0
No-0	H	2	1	pooled from 3	1	9	1-Sep	2018	35	1071	41	0	No-0_1	0
No-0	H	2	1	pooled from 3	1	9	1-Sep	2018	35	1071	42	1	No-0_1	0.093370682
No-0	H	2	1	pooled from 3	1	9	1-Sep	2018	35	1071	43	0	No-0_1	0
No-0	H	2	1	pooled from 3	1	9	1-Sep	2018	35	1071	44	1	No-0_1	0.093370682
No-0	H	2	1	pooled from 3	1	9	1-Sep	2018	35	1071	45	1	No-0_1	0.093370682
No-0	H	2	1	pooled from 3	1	9	1-Sep	2018	35	1071	46	1	No-0_1	0.093370682
No-0	H	2	1	pooled from 3	1	9	1-Sep	2018	35	1071	47	1	No-0_1	0.093370682
No-0	H	2	1	pooled from 3	1	9	1-Sep	2018	35	1071	48	1	No-0_1	0.093370682
No-0	H	2	1	pooled from 3	1	9	1-Sep	2018	35	1071	49	1	No-0_1	0.093370682
No-0	H	2	1	pooled from 3	1	9	1-Sep	2018	35	1071	50	0	No-0_1	0
No-0	H	2	1	pooled from 3	1	9	1-Sep	2018	35	1071	51	0	No-0_1	0
No-0	H	2	1	pooled from 3	1	9	1-Sep	2018	35	1071	52	1	No-0_1	0.093370682
No-0	H	2	1	pooled from 3	1	9	1-Sep	2018	35	1071	53	1	No-0_1	0.093370682
No-0	H	2	1	pooled from 3	1	9	1-Sep	2018	35	1071	54	1	No-0_1	0.093370682
No-0	H	2	1	pooled from 3	1	9	1-Sep	2018	35	1071	55	0	No-0_1	0
No-0	H	2	1	pooled from 3	1	9	1-Sep	2018	35	1071	56	0	No-0_1	0
No-0	H	2	1	pooled from 3	1	9	1-Sep	2018	35	1071	57	0	No-0_1	0
No-0	H	2	1	pooled from 3	1	9	1-Sep	2018	35	1071	58	0	No-0_1	0
No-0	H	2	1	pooled from 3	1	9	1-Sep	2018	35	1071	59	0	No-0_1	0
No-0	H	2	1	pooled from 3	1	9	1-Sep	2018	35	1071	60	2	No-0_1	0.186741363
