# Supplementary material for: An ABA-GA bistable switch can account for natural variation in the variability of Arabidopsis seed germination time
Source: eLife. 2021 Jun 1;10:e59485. doi: 10.7554/eLife.59485 (PMC8169117; doi:10.7554/eLife.59485)
Supplement: Figure 1—source data 1. [file elife-59485-fig1-data1.tds]

Line	day	perc	name	group	RepNumber
Bur-0	1	0	1_17-Nov_1B_30	magic parents	1
Bur-0	2	96.55172414	1_17-Nov_1B_30	magic parents	1
Bur-0	3	1.724137931	1_17-Nov_1B_30	magic parents	1
Bur-0	4	0	1_17-Nov_1B_30	magic parents	1
Bur-0	1	0	1_17-Nov_2A_30	magic parents	2
Bur-0	2	96.11650485	1_17-Nov_2A_30	magic parents	2
Bur-0	3	2.912621359	1_17-Nov_2A_30	magic parents	2
Bur-0	4	0	1_17-Nov_2A_30	magic parents	2
Bur-0	1	0	1_17-Nov_2B_30	magic parents	3
Bur-0	2	93.80530973	1_17-Nov_2B_30	magic parents	3
Bur-0	3	3.539823009	1_17-Nov_2B_30	magic parents	3
Bur-0	4	0.884955752	1_17-Nov_2B_30	magic parents	3
Col-0	1	0	3_3-Nov_1B_33	magic parents	2
Col-0	2	96.96969697	3_3-Nov_1B_33	magic parents	2
Col-0	3	0	3_3-Nov_1B_33	magic parents	2
Col-0	1	0	3_3-Nov_2A_33	magic parents	1
Col-0	2	97.69230769	3_3-Nov_2A_33	magic parents	1
Col-0	3	0.769230769	3_3-Nov_2A_33	magic parents	1
Col-0	1	0	3_3-Nov_3A_33	magic parents	3
Col-0	2	100	3_3-Nov_3A_33	magic parents	3
Col-0	3	0	3_3-Nov_3A_33	magic parents	3
Sf-2	1	0	14_10/5/2016_1_29	magic parents	1
Sf-2	2	0	14_10/5/2016_1_29	magic parents	1
Sf-2	3	14.59854015	14_10/5/2016_1_29	magic parents	1
Sf-2	4	10.2189781	14_10/5/2016_1_29	magic parents	1
Sf-2	5	6.569343066	14_10/5/2016_1_29	magic parents	1
Sf-2	6	3.649635036	14_10/5/2016_1_29	magic parents	1
Sf-2	7	1.459854015	14_10/5/2016_1_29	magic parents	1
Sf-2	8	0	14_10/5/2016_1_29	magic parents	1
Sf-2	9	0.729927007	14_10/5/2016_1_29	magic parents	1
Sf-2	1	0	14_10/5/2016_2_29	magic parents	2
Sf-2	2	3.448275862	14_10/5/2016_2_29	magic parents	2
Sf-2	3	29.65517241	14_10/5/2016_2_29	magic parents	2
Sf-2	4	25.51724138	14_10/5/2016_2_29	magic parents	2
Sf-2	5	13.79310345	14_10/5/2016_2_29	magic parents	2
Sf-2	6	4.137931034	14_10/5/2016_2_29	magic parents	2
Sf-2	7	0.689655172	14_10/5/2016_2_29	magic parents	2
Sf-2	8	0	14_10/5/2016_2_29	magic parents	2
Sf-2	9	0	14_10/5/2016_2_29	magic parents	2
Sf-2	1	0	14_10/5/2016_3_29	magic parents	3
Sf-2	2	0.694444444	14_10/5/2016_3_29	magic parents	3
Sf-2	3	13.19444444	14_10/5/2016_3_29	magic parents	3
Sf-2	4	10.41666667	14_10/5/2016_3_29	magic parents	3
Sf-2	5	4.166666667	14_10/5/2016_3_29	magic parents	3
Sf-2	6	2.777777778	14_10/5/2016_3_29	magic parents	3
Sf-2	7	0	14_10/5/2016_3_29	magic parents	3
Sf-2	8	2.083333333	14_10/5/2016_3_29	magic parents	3
Sf-2	9	1.388888889	14_10/5/2016_3_29	magic parents	3
Ws-0	1	0	17_10/5/2016_1_29	magic parents	1
Ws-0	2	14	17_10/5/2016_1_29	magic parents	1
Ws-0	3	48	17_10/5/2016_1_29	magic parents	1
Ws-0	4	28.66666667	17_10/5/2016_1_29	magic parents	1
Ws-0	5	4	17_10/5/2016_1_29	magic parents	1
Ws-0	6	2.666666667	17_10/5/2016_1_29	magic parents	1
Ws-0	7	0	17_10/5/2016_1_29	magic parents	1
Ws-0	8	0	17_10/5/2016_1_29	magic parents	1
Ws-0	9	0	17_10/5/2016_1_29	magic parents	1
Ws-0	10	0	17_10/5/2016_1_29	magic parents	1
Ws-0	11	0.666666667	17_10/5/2016_1_29	magic parents	1
Ws-0	12	0	17_10/5/2016_1_29	magic parents	1
Ws-0	13	0	17_10/5/2016_1_29	magic parents	1
Ws-0	14	0	17_10/5/2016_1_29	magic parents	1
Ws-0	1	0	17_10/5/2016_2_29	magic parents	2
Ws-0	2	9.219858156	17_10/5/2016_2_29	magic parents	2
Ws-0	3	34.75177305	17_10/5/2016_2_29	magic parents	2
Ws-0	4	25.53191489	17_10/5/2016_2_29	magic parents	2
Ws-0	5	8.510638298	17_10/5/2016_2_29	magic parents	2
Ws-0	6	2.127659574	17_10/5/2016_2_29	magic parents	2
Ws-0	7	0	17_10/5/2016_2_29	magic parents	2
Ws-0	8	0	17_10/5/2016_2_29	magic parents	2
Ws-0	9	1.418439716	17_10/5/2016_2_29	magic parents	2
Ws-0	10	0	17_10/5/2016_2_29	magic parents	2
Ws-0	11	0.709219858	17_10/5/2016_2_29	magic parents	2
Ws-0	12	0	17_10/5/2016_2_29	magic parents	2
Ws-0	13	0	17_10/5/2016_2_29	magic parents	2
Ws-0	14	0	17_10/5/2016_2_29	magic parents	2
Ws-0	1	0	17_10/5/2016_3_29	magic parents	3
Ws-0	2	0	17_10/5/2016_3_29	magic parents	3
Ws-0	3	3.007518797	17_10/5/2016_3_29	magic parents	3
Ws-0	4	27.06766917	17_10/5/2016_3_29	magic parents	3
Ws-0	5	17.29323308	17_10/5/2016_3_29	magic parents	3
Ws-0	6	6.766917293	17_10/5/2016_3_29	magic parents	3
Ws-0	7	3.007518797	17_10/5/2016_3_29	magic parents	3
Ws-0	8	2.255639098	17_10/5/2016_3_29	magic parents	3
Ws-0	9	3.007518797	17_10/5/2016_3_29	magic parents	3
Ws-0	10	3.759398496	17_10/5/2016_3_29	magic parents	3
Ws-0	11	1.503759398	17_10/5/2016_3_29	magic parents	3
Ws-0	12	0	17_10/5/2016_3_29	magic parents	3
Ws-0	13	0	17_10/5/2016_3_29	magic parents	3
Ws-0	14	0.751879699	17_10/5/2016_3_29	magic parents	3
Aul-0	1	0	Aul-0_1_30-Jan_27	accessions	1
Aul-0	2	0	Aul-0_1_30-Jan_27	accessions	1
Aul-0	3	2.23880597	Aul-0_1_30-Jan_27	accessions	1
Aul-0	4	2.985074627	Aul-0_1_30-Jan_27	accessions	1
Aul-0	5	2.985074627	Aul-0_1_30-Jan_27	accessions	1
Aul-0	6	4.47761194	Aul-0_1_30-Jan_27	accessions	1
Aul-0	7	0.746268657	Aul-0_1_30-Jan_27	accessions	1
Aul-0	8	4.47761194	Aul-0_1_30-Jan_27	accessions	1
Aul-0	9	2.23880597	Aul-0_1_30-Jan_27	accessions	1
Aul-0	10	0.746268657	Aul-0_1_30-Jan_27	accessions	1
Aul-0	11	0	Aul-0_1_30-Jan_27	accessions	1
Aul-0	12	0	Aul-0_1_30-Jan_27	accessions	1
Aul-0	13	0	Aul-0_1_30-Jan_27	accessions	1
Aul-0	14	0	Aul-0_1_30-Jan_27	accessions	1
Aul-0	15	0	Aul-0_1_30-Jan_27	accessions	1
Aul-0	16	0	Aul-0_1_30-Jan_27	accessions	1
Aul-0	17	0	Aul-0_1_30-Jan_27	accessions	1
Aul-0	18	0	Aul-0_1_30-Jan_27	accessions	1
Aul-0	19	0	Aul-0_1_30-Jan_27	accessions	1
Aul-0	20	0	Aul-0_1_30-Jan_27	accessions	1
Aul-0	21	0	Aul-0_1_30-Jan_27	accessions	1
Aul-0	22	0	Aul-0_1_30-Jan_27	accessions	1
Aul-0	1	0	Aul-0_2_30-Jan_27	accessions	2
Aul-0	2	0	Aul-0_2_30-Jan_27	accessions	2
Aul-0	3	3.278688525	Aul-0_2_30-Jan_27	accessions	2
Aul-0	4	4.918032787	Aul-0_2_30-Jan_27	accessions	2
Aul-0	5	4.918032787	Aul-0_2_30-Jan_27	accessions	2
Aul-0	6	2.459016393	Aul-0_2_30-Jan_27	accessions	2
Aul-0	7	2.459016393	Aul-0_2_30-Jan_27	accessions	2
Aul-0	8	3.278688525	Aul-0_2_30-Jan_27	accessions	2
Aul-0	9	2.459016393	Aul-0_2_30-Jan_27	accessions	2
Aul-0	10	0	Aul-0_2_30-Jan_27	accessions	2
Aul-0	11	0	Aul-0_2_30-Jan_27	accessions	2
Aul-0	12	1.639344262	Aul-0_2_30-Jan_27	accessions	2
Aul-0	13	0	Aul-0_2_30-Jan_27	accessions	2
Aul-0	14	0.819672131	Aul-0_2_30-Jan_27	accessions	2
Aul-0	15	0	Aul-0_2_30-Jan_27	accessions	2
Aul-0	16	0	Aul-0_2_30-Jan_27	accessions	2
Aul-0	17	0	Aul-0_2_30-Jan_27	accessions	2
Aul-0	18	0	Aul-0_2_30-Jan_27	accessions	2
Aul-0	19	0	Aul-0_2_30-Jan_27	accessions	2
Aul-0	20	0	Aul-0_2_30-Jan_27	accessions	2
Aul-0	21	0	Aul-0_2_30-Jan_27	accessions	2
Aul-0	22	0.819672131	Aul-0_2_30-Jan_27	accessions	2
Aul-0	1	0	Aul-0_3_30-Jan_27	accessions	3
Aul-0	2	0	Aul-0_3_30-Jan_27	accessions	3
Aul-0	3	0.840336134	Aul-0_3_30-Jan_27	accessions	3
Aul-0	4	0.840336134	Aul-0_3_30-Jan_27	accessions	3
Aul-0	5	3.361344538	Aul-0_3_30-Jan_27	accessions	3
Aul-0	6	5.882352941	Aul-0_3_30-Jan_27	accessions	3
Aul-0	7	5.882352941	Aul-0_3_30-Jan_27	accessions	3
Aul-0	8	6.722689076	Aul-0_3_30-Jan_27	accessions	3
Aul-0	9	1.680672269	Aul-0_3_30-Jan_27	accessions	3
Aul-0	10	1.680672269	Aul-0_3_30-Jan_27	accessions	3
Aul-0	11	0	Aul-0_3_30-Jan_27	accessions	3
Aul-0	12	0	Aul-0_3_30-Jan_27	accessions	3
Aul-0	13	0.840336134	Aul-0_3_30-Jan_27	accessions	3
Aul-0	14	0	Aul-0_3_30-Jan_27	accessions	3
Aul-0	15	0	Aul-0_3_30-Jan_27	accessions	3
Aul-0	16	0	Aul-0_3_30-Jan_27	accessions	3
Aul-0	17	0	Aul-0_3_30-Jan_27	accessions	3
Aul-0	18	0	Aul-0_3_30-Jan_27	accessions	3
Aul-0	19	0.840336134	Aul-0_3_30-Jan_27	accessions	3
Aul-0	20	0	Aul-0_3_30-Jan_27	accessions	3
Aul-0	21	0	Aul-0_3_30-Jan_27	accessions	3
Aul-0	22	1.680672269	Aul-0_3_30-Jan_27	accessions	3
Mad-0	1	0	Mad-0_1_30-Jan_27	accessions	1
Mad-0	2	0.869565217	Mad-0_1_30-Jan_27	accessions	1
Mad-0	3	17.39130435	Mad-0_1_30-Jan_27	accessions	1
Mad-0	4	9.565217391	Mad-0_1_30-Jan_27	accessions	1
Mad-0	5	6.956521739	Mad-0_1_30-Jan_27	accessions	1
Mad-0	6	6.956521739	Mad-0_1_30-Jan_27	accessions	1
Mad-0	7	0.869565217	Mad-0_1_30-Jan_27	accessions	1
Mad-0	8	0	Mad-0_1_30-Jan_27	accessions	1
Mad-0	9	0	Mad-0_1_30-Jan_27	accessions	1
Mad-0	1	0	Mad-0_2_30-Jan_27	accessions	2
Mad-0	2	23.07692308	Mad-0_2_30-Jan_27	accessions	2
Mad-0	3	24.78632479	Mad-0_2_30-Jan_27	accessions	2
Mad-0	4	7.692307692	Mad-0_2_30-Jan_27	accessions	2
Mad-0	5	0.854700855	Mad-0_2_30-Jan_27	accessions	2
Mad-0	6	1.709401709	Mad-0_2_30-Jan_27	accessions	2
Mad-0	7	0.854700855	Mad-0_2_30-Jan_27	accessions	2
Mad-0	8	1.709401709	Mad-0_2_30-Jan_27	accessions	2
Mad-0	9	2.564102564	Mad-0_2_30-Jan_27	accessions	2
Mad-0	1	0	Mad-0_3_30-Jan_27	accessions	3
Mad-0	2	1.538461538	Mad-0_3_30-Jan_27	accessions	3
Mad-0	3	40	Mad-0_3_30-Jan_27	accessions	3
Mad-0	4	26.15384615	Mad-0_3_30-Jan_27	accessions	3
Mad-0	5	1.538461538	Mad-0_3_30-Jan_27	accessions	3
Mad-0	6	0.769230769	Mad-0_3_30-Jan_27	accessions	3
Mad-0	7	0	Mad-0_3_30-Jan_27	accessions	3
Mad-0	8	0	Mad-0_3_30-Jan_27	accessions	3
Mad-0	9	0	Mad-0_3_30-Jan_27	accessions	3
Svi-0	1	0	Svi-0_1_6-Jan_37	accessions	1
Svi-0	2	1.639344262	Svi-0_1_6-Jan_37	accessions	1
Svi-0	3	8.196721311	Svi-0_1_6-Jan_37	accessions	1
Svi-0	4	0.819672131	Svi-0_1_6-Jan_37	accessions	1
Svi-0	1	0	Svi-0_2_6-Jan_37	accessions	2
Svi-0	2	4.285714286	Svi-0_2_6-Jan_37	accessions	2
Svi-0	3	5.714285714	Svi-0_2_6-Jan_37	accessions	2
Svi-0	4	0.714285714	Svi-0_2_6-Jan_37	accessions	2
Svi-0	1	0	Svi-0_3_6-Jan_37	accessions	3
Svi-0	2	1.388888889	Svi-0_3_6-Jan_37	accessions	3
Svi-0	3	13.19444444	Svi-0_3_6-Jan_37	accessions	3
Svi-0	4	1.388888889	Svi-0_3_6-Jan_37	accessions	3
M108	1	0	M108_04-Mar_1	magic	1
M108	2	0	M108_04-Mar_1	magic	1
M108	3	91.02564103	M108_04-Mar_1	magic	1
M108	4	8.333333333	M108_04-Mar_1	magic	1
M108	5	0.641025641	M108_04-Mar_1	magic	1
M108	1	0	M108_04-Mar_2	magic	2
M108	2	0	M108_04-Mar_2	magic	2
M108	3	95	M108_04-Mar_2	magic	2
M108	4	4.375	M108_04-Mar_2	magic	2
M108	5	0	M108_04-Mar_2	magic	2
M108	1	0	M108_04-Mar_4	magic	3
M108	2	0.621118012	M108_04-Mar_4	magic	3
M108	3	88.19875776	M108_04-Mar_4	magic	3
M108	4	9.937888199	M108_04-Mar_4	magic	3
M108	5	0.621118012	M108_04-Mar_4	magic	3
M178	1	0	M178_20-Apr_1	magic	7
M178	2	1.307189542	M178_20-Apr_1	magic	7
M178	3	6.535947712	M178_20-Apr_1	magic	7
M178	4	4.575163399	M178_20-Apr_1	magic	7
M178	5	3.267973856	M178_20-Apr_1	magic	7
M178	6	12.41830065	M178_20-Apr_1	magic	7
M178	7	7.843137255	M178_20-Apr_1	magic	7
M178	8	4.575163399	M178_20-Apr_1	magic	7
M178	9	3.921568627	M178_20-Apr_1	magic	7
M178	10	1.307189542	M178_20-Apr_1	magic	7
M178	11	0.653594771	M178_20-Apr_1	magic	7
M178	12	1.307189542	M178_20-Apr_1	magic	7
M178	13	0	M178_20-Apr_1	magic	7
M178	14	0	M178_20-Apr_1	magic	7
M178	15	0	M178_20-Apr_1	magic	7
M178	16	0	M178_20-Apr_1	magic	7
M178	17	0	M178_20-Apr_1	magic	7
M178	18	0	M178_20-Apr_1	magic	7
M178	19	0	M178_20-Apr_1	magic	7
M178	20	0	M178_20-Apr_1	magic	7
M178	21	0.653594771	M178_20-Apr_1	magic	7
M178	22	0	M178_20-Apr_1	magic	7
M178	23	0.653594771	M178_20-Apr_1	magic	7
M178	24	0	M178_20-Apr_1	magic	7
M178	25	0	M178_20-Apr_1	magic	7
M178	26	0	M178_20-Apr_1	magic	7
M178	27	0	M178_20-Apr_1	magic	7
M178	28	0	M178_20-Apr_1	magic	7
M178	29	0.653594771	M178_20-Apr_1	magic	7
M178	30	0	M178_20-Apr_1	magic	7
M178	31	1.307189542	M178_20-Apr_1	magic	7
M178	32	0.653594771	M178_20-Apr_1	magic	7
M178	33	1.307189542	M178_20-Apr_1	magic	7
M178	34	0	M178_20-Apr_1	magic	7
M178	35	1.307189542	M178_20-Apr_1	magic	7
M178	36	2.614379085	M178_20-Apr_1	magic	7
M178	37	1.960784314	M178_20-Apr_1	magic	7
M178	38	3.921568627	M178_20-Apr_1	magic	7
M178	39	2.614379085	M178_20-Apr_1	magic	7
M178	40	1.960784314	M178_20-Apr_1	magic	7
M178	41	1.960784314	M178_20-Apr_1	magic	7
M178	42	3.267973856	M178_20-Apr_1	magic	7
M178	43	0	M178_20-Apr_1	magic	7
M178	44	2.614379085	M178_20-Apr_1	magic	7
M178	45	0.653594771	M178_20-Apr_1	magic	7
M178	46	0.653594771	M178_20-Apr_1	magic	7
M178	47	0	M178_20-Apr_1	magic	7
M178	48	0.653594771	M178_20-Apr_1	magic	7
M178	49	0	M178_20-Apr_1	magic	7
M178	50	0	M178_20-Apr_1	magic	7
M178	51	0	M178_20-Apr_1	magic	7
M178	1	0	M178_20-Apr_2	magic	6
M178	2	4.046242775	M178_20-Apr_2	magic	6
M178	3	6.936416185	M178_20-Apr_2	magic	6
M178	4	8.670520231	M178_20-Apr_2	magic	6
M178	5	8.670520231	M178_20-Apr_2	magic	6
M178	6	15.02890173	M178_20-Apr_2	magic	6
M178	7	15.02890173	M178_20-Apr_2	magic	6
M178	8	12.13872832	M178_20-Apr_2	magic	6
M178	9	4.046242775	M178_20-Apr_2	magic	6
M178	10	4.624277457	M178_20-Apr_2	magic	6
M178	11	0	M178_20-Apr_2	magic	6
M178	12	0	M178_20-Apr_2	magic	6
M178	13	0	M178_20-Apr_2	magic	6
M178	14	0	M178_20-Apr_2	magic	6
M178	15	0	M178_20-Apr_2	magic	6
M178	16	0	M178_20-Apr_2	magic	6
M178	17	0	M178_20-Apr_2	magic	6
M178	18	0	M178_20-Apr_2	magic	6
M178	19	0	M178_20-Apr_2	magic	6
M178	20	0	M178_20-Apr_2	magic	6
M178	21	0	M178_20-Apr_2	magic	6
M178	22	0.578034682	M178_20-Apr_2	magic	6
M178	23	0	M178_20-Apr_2	magic	6
M178	24	0	M178_20-Apr_2	magic	6
M178	25	0	M178_20-Apr_2	magic	6
M178	26	0	M178_20-Apr_2	magic	6
M178	27	0	M178_20-Apr_2	magic	6
M178	28	0	M178_20-Apr_2	magic	6
M178	29	0	M178_20-Apr_2	magic	6
M178	30	0	M178_20-Apr_2	magic	6
M178	31	0	M178_20-Apr_2	magic	6
M178	32	0	M178_20-Apr_2	magic	6
M178	33	0	M178_20-Apr_2	magic	6
M178	34	0	M178_20-Apr_2	magic	6
M178	35	0	M178_20-Apr_2	magic	6
M178	36	0	M178_20-Apr_2	magic	6
M178	37	0	M178_20-Apr_2	magic	6
M178	38	0	M178_20-Apr_2	magic	6
M178	39	0	M178_20-Apr_2	magic	6
M178	40	0	M178_20-Apr_2	magic	6
M178	41	0	M178_20-Apr_2	magic	6
M178	42	0	M178_20-Apr_2	magic	6
M178	43	0	M178_20-Apr_2	magic	6
M178	44	0	M178_20-Apr_2	magic	6
M178	45	5.780346821	M178_20-Apr_2	magic	6
M178	46	2.89017341	M178_20-Apr_2	magic	6
M178	47	0	M178_20-Apr_2	magic	6
M178	48	2.312138728	M178_20-Apr_2	magic	6
M178	49	0.578034682	M178_20-Apr_2	magic	6
M178	50	2.89017341	M178_20-Apr_2	magic	6
M178	51	0	M178_20-Apr_2	magic	6
M178	1	0	M178_13-Apr_3	magic	1
M178	2	0	M178_13-Apr_3	magic	1
M178	3	6.593406593	M178_13-Apr_3	magic	1
M178	4	25.82417582	M178_13-Apr_3	magic	1
M178	5	6.043956044	M178_13-Apr_3	magic	1
M178	6	9.340659341	M178_13-Apr_3	magic	1
M178	7	5.494505495	M178_13-Apr_3	magic	1
M178	8	0.549450549	M178_13-Apr_3	magic	1
M178	9	0	M178_13-Apr_3	magic	1
M178	10	0	M178_13-Apr_3	magic	1
M178	11	0	M178_13-Apr_3	magic	1
M178	12	0	M178_13-Apr_3	magic	1
M178	13	0	M178_13-Apr_3	magic	1
M178	14	0.549450549	M178_13-Apr_3	magic	1
M178	15	0	M178_13-Apr_3	magic	1
M178	16	0	M178_13-Apr_3	magic	1
M178	17	0	M178_13-Apr_3	magic	1
M178	18	0	M178_13-Apr_3	magic	1
M178	19	0	M178_13-Apr_3	magic	1
M178	20	0	M178_13-Apr_3	magic	1
M178	21	0	M178_13-Apr_3	magic	1
M178	22	0	M178_13-Apr_3	magic	1
M178	23	0	M178_13-Apr_3	magic	1
M178	24	0	M178_13-Apr_3	magic	1
M182	1	0	M182_19-Jan_1B	magic	1
M182	2	3.738317757	M182_19-Jan_1B	magic	1
M182	3	25.23364486	M182_19-Jan_1B	magic	1
M182	4	22.42990654	M182_19-Jan_1B	magic	1
M182	5	6.542056075	M182_19-Jan_1B	magic	1
M182	6	4.672897196	M182_19-Jan_1B	magic	1
M182	7	3.738317757	M182_19-Jan_1B	magic	1
M182	8	3.738317757	M182_19-Jan_1B	magic	1
M182	9	1.869158879	M182_19-Jan_1B	magic	1
M182	10	0.934579439	M182_19-Jan_1B	magic	1
M182	11	0	M182_19-Jan_1B	magic	1
M182	12	0	M182_19-Jan_1B	magic	1
M182	13	0	M182_19-Jan_1B	magic	1
M182	14	0	M182_19-Jan_1B	magic	1
M182	15	0.934579439	M182_19-Jan_1B	magic	1
M182	16	0	M182_19-Jan_1B	magic	1
M182	17	0	M182_19-Jan_1B	magic	1
M182	18	0	M182_19-Jan_1B	magic	1
M182	19	0	M182_19-Jan_1B	magic	1
M182	20	0	M182_19-Jan_1B	magic	1
M182	21	0.934579439	M182_19-Jan_1B	magic	1
M182	22	0	M182_19-Jan_1B	magic	1
M182	23	0	M182_19-Jan_1B	magic	1
M182	24	0	M182_19-Jan_1B	magic	1
M182	25	0.934579439	M182_19-Jan_1B	magic	1
M182	26	2.803738318	M182_19-Jan_1B	magic	1
M182	27	0.934579439	M182_19-Jan_1B	magic	1
M182	28	0.934579439	M182_19-Jan_1B	magic	1
M182	29	2.803738318	M182_19-Jan_1B	magic	1
M182	30	0	M182_19-Jan_1B	magic	1
M182	31	1.869158879	M182_19-Jan_1B	magic	1
M182	32	0.934579439	M182_19-Jan_1B	magic	1
M182	33	1.869158879	M182_19-Jan_1B	magic	1
M182	34	0	M182_19-Jan_1B	magic	1
M182	35	0.934579439	M182_19-Jan_1B	magic	1
M182	36	0.934579439	M182_19-Jan_1B	magic	1
M182	37	0.934579439	M182_19-Jan_1B	magic	1
M182	1	0	M182_19-Jan_3A	magic	2
M182	2	5.660377358	M182_19-Jan_3A	magic	2
M182	3	38.67924528	M182_19-Jan_3A	magic	2
M182	4	14.1509434	M182_19-Jan_3A	magic	2
M182	5	8.490566038	M182_19-Jan_3A	magic	2
M182	6	5.660377358	M182_19-Jan_3A	magic	2
M182	7	0	M182_19-Jan_3A	magic	2
M182	8	0.943396226	M182_19-Jan_3A	magic	2
M182	9	0	M182_19-Jan_3A	magic	2
M182	10	0	M182_19-Jan_3A	magic	2
M182	11	0	M182_19-Jan_3A	magic	2
M182	12	0	M182_19-Jan_3A	magic	2
M182	13	0	M182_19-Jan_3A	magic	2
M182	14	0	M182_19-Jan_3A	magic	2
M182	15	0	M182_19-Jan_3A	magic	2
M182	16	0	M182_19-Jan_3A	magic	2
M182	17	0	M182_19-Jan_3A	magic	2
M182	18	0	M182_19-Jan_3A	magic	2
M182	19	0	M182_19-Jan_3A	magic	2
M182	20	0	M182_19-Jan_3A	magic	2
M182	21	0	M182_19-Jan_3A	magic	2
M182	22	0	M182_19-Jan_3A	magic	2
M182	23	0	M182_19-Jan_3A	magic	2
M182	24	0.943396226	M182_19-Jan_3A	magic	2
M182	25	0	M182_19-Jan_3A	magic	2
M182	26	2.830188679	M182_19-Jan_3A	magic	2
M182	27	1.886792453	M182_19-Jan_3A	magic	2
M182	28	2.830188679	M182_19-Jan_3A	magic	2
M182	29	0	M182_19-Jan_3A	magic	2
M182	30	1.886792453	M182_19-Jan_3A	magic	2
M182	31	0.943396226	M182_19-Jan_3A	magic	2
M182	32	0	M182_19-Jan_3A	magic	2
M182	33	0	M182_19-Jan_3A	magic	2
M182	34	0.943396226	M182_19-Jan_3A	magic	2
M182	35	0	M182_19-Jan_3A	magic	2
M182	36	0.943396226	M182_19-Jan_3A	magic	2
M182	37	0.943396226	M182_19-Jan_3A	magic	2
M182	1	0	M182_19-Jan_3B	magic	3
M182	2	2.97029703	M182_19-Jan_3B	magic	3
M182	3	47.52475248	M182_19-Jan_3B	magic	3
M182	4	15.84158416	M182_19-Jan_3B	magic	3
M182	5	8.910891089	M182_19-Jan_3B	magic	3
M182	6	1.98019802	M182_19-Jan_3B	magic	3
M182	7	0.99009901	M182_19-Jan_3B	magic	3
M182	8	0.99009901	M182_19-Jan_3B	magic	3
M182	9	0	M182_19-Jan_3B	magic	3
M182	10	0	M182_19-Jan_3B	magic	3
M182	11	0	M182_19-Jan_3B	magic	3
M182	12	0	M182_19-Jan_3B	magic	3
M182	13	0	M182_19-Jan_3B	magic	3
M182	14	0	M182_19-Jan_3B	magic	3
M182	15	0	M182_19-Jan_3B	magic	3
M182	16	0	M182_19-Jan_3B	magic	3
M182	17	0.99009901	M182_19-Jan_3B	magic	3
M182	18	0	M182_19-Jan_3B	magic	3
M182	19	0	M182_19-Jan_3B	magic	3
M182	20	0	M182_19-Jan_3B	magic	3
M182	21	0	M182_19-Jan_3B	magic	3
M182	22	0	M182_19-Jan_3B	magic	3
M182	23	0	M182_19-Jan_3B	magic	3
M182	24	0	M182_19-Jan_3B	magic	3
M182	25	0	M182_19-Jan_3B	magic	3
M182	26	1.98019802	M182_19-Jan_3B	magic	3
M182	27	0	M182_19-Jan_3B	magic	3
M182	28	0	M182_19-Jan_3B	magic	3
M182	29	0	M182_19-Jan_3B	magic	3
M182	30	0	M182_19-Jan_3B	magic	3
M182	31	2.97029703	M182_19-Jan_3B	magic	3
M182	32	0	M182_19-Jan_3B	magic	3
M182	33	1.98019802	M182_19-Jan_3B	magic	3
M182	34	0	M182_19-Jan_3B	magic	3
M182	35	0	M182_19-Jan_3B	magic	3
M182	36	0	M182_19-Jan_3B	magic	3
M182	37	0	M182_19-Jan_3B	magic	3
M203	1	0	M203_13-Apr_3	magic	1
M203	2	0	M203_13-Apr_3	magic	1
M203	3	98.79518072	M203_13-Apr_3	magic	1
M203	4	1.204819277	M203_13-Apr_3	magic	1
M203	1	0	M203_13-Apr_4	magic	2
M203	2	1.162790698	M203_13-Apr_4	magic	2
M203	3	97.6744186	M203_13-Apr_4	magic	2
M203	4	1.162790698	M203_13-Apr_4	magic	2
M203	1	0	M203_13-Apr_5	magic	3
M203	2	0.561797753	M203_13-Apr_5	magic	3
M203	3	96.62921348	M203_13-Apr_5	magic	3
M203	4	2.808988764	M203_13-Apr_5	magic	3
M285	1	0	M285_01-Jun_2	magic	1
M285	2	9.917355372	M285_01-Jun_2	magic	1
M285	3	19.00826446	M285_01-Jun_2	magic	1
M285	4	16.52892562	M285_01-Jun_2	magic	1
M285	5	18.18181818	M285_01-Jun_2	magic	1
M285	6	8.26446281	M285_01-Jun_2	magic	1
M285	7	6.611570248	M285_01-Jun_2	magic	1
M285	8	2.479338843	M285_01-Jun_2	magic	1
M285	9	0.826446281	M285_01-Jun_2	magic	1
M285	10	0	M285_01-Jun_2	magic	1
M285	11	2.479338843	M285_01-Jun_2	magic	1
M285	12	1.652892562	M285_01-Jun_2	magic	1
M285	1	0	M285_01-Jun_3	magic	2
M285	2	11.62790698	M285_01-Jun_3	magic	2
M285	3	33.33333333	M285_01-Jun_3	magic	2
M285	4	15.50387597	M285_01-Jun_3	magic	2
M285	5	15.50387597	M285_01-Jun_3	magic	2
M285	6	2.325581395	M285_01-Jun_3	magic	2
M285	7	0.775193798	M285_01-Jun_3	magic	2
M285	8	0.775193798	M285_01-Jun_3	magic	2
M285	9	0.775193798	M285_01-Jun_3	magic	2
M285	10	0	M285_01-Jun_3	magic	2
M285	11	1.550387597	M285_01-Jun_3	magic	2
M285	1	0	M285_01-Jun_5	magic	3
M285	2	0.793650794	M285_01-Jun_5	magic	3
M285	3	1.587301587	M285_01-Jun_5	magic	3
M285	4	5.555555556	M285_01-Jun_5	magic	3
M285	5	10.31746032	M285_01-Jun_5	magic	3
M285	6	3.174603175	M285_01-Jun_5	magic	3
M285	7	0.793650794	M285_01-Jun_5	magic	3
M285	8	0.793650794	M285_01-Jun_5	magic	3
M285	9	0	M285_01-Jun_5	magic	3
M285	10	0.793650794	M285_01-Jun_5	magic	3
M285	11	0.793650794	M285_01-Jun_5	magic	3
M285	12	3.174603175	M285_01-Jun_5	magic	3
M285	13	0	M285_01-Jun_5	magic	3
M285	14	0	M285_01-Jun_5	magic	3
M285	15	0.793650794	M285_01-Jun_5	magic	3
M285	16	0.793650794	M285_01-Jun_5	magic	3
M393	1	0	M393_19-Jul_2	magic	3
M393	2	5.072463768	M393_19-Jul_2	magic	3
M393	3	39.13043478	M393_19-Jul_2	magic	3
M393	4	32.60869565	M393_19-Jul_2	magic	3
M393	5	9.420289855	M393_19-Jul_2	magic	3
M393	6	3.623188406	M393_19-Jul_2	magic	3
M393	7	2.173913043	M393_19-Jul_2	magic	3
M393	8	0	M393_19-Jul_2	magic	3
M393	9	0.724637681	M393_19-Jul_2	magic	3
M393	10	0	M393_19-Jul_2	magic	3
M393	11	0.724637681	M393_19-Jul_2	magic	3
M393	12	0	M393_19-Jul_2	magic	3
M393	13	0.724637681	M393_19-Jul_2	magic	3
M393	14	0	M393_19-Jul_2	magic	3
M393	15	0.724637681	M393_19-Jul_2	magic	3
M393	16	0	M393_19-Jul_2	magic	3
M393	17	0	M393_19-Jul_2	magic	3
M393	18	0	M393_19-Jul_2	magic	3
M393	1	0	M393_19-Jul_4a	magic	2
M393	2	0	M393_19-Jul_4a	magic	2
M393	3	29.92125984	M393_19-Jul_4a	magic	2
M393	4	25.98425197	M393_19-Jul_4a	magic	2
M393	5	19.68503937	M393_19-Jul_4a	magic	2
M393	6	3.149606299	M393_19-Jul_4a	magic	2
M393	7	3.149606299	M393_19-Jul_4a	magic	2
M393	8	7.086614173	M393_19-Jul_4a	magic	2
M393	9	2.362204724	M393_19-Jul_4a	magic	2
M393	10	2.362204724	M393_19-Jul_4a	magic	2
M393	11	0.787401575	M393_19-Jul_4a	magic	2
M393	12	0	M393_19-Jul_4a	magic	2
M393	13	0	M393_19-Jul_4a	magic	2
M393	14	0	M393_19-Jul_4a	magic	2
M393	15	0	M393_19-Jul_4a	magic	2
M393	16	0	M393_19-Jul_4a	magic	2
M393	17	0	M393_19-Jul_4a	magic	2
M393	18	0.787401575	M393_19-Jul_4a	magic	2
M393	1	0	M393_19-Jul_4b	magic	1
M393	2	2.941176471	M393_19-Jul_4b	magic	1
M393	3	63.97058824	M393_19-Jul_4b	magic	1
M393	4	19.85294118	M393_19-Jul_4b	magic	1
M393	5	9.558823529	M393_19-Jul_4b	magic	1
M393	6	0.735294118	M393_19-Jul_4b	magic	1
M393	7	0	M393_19-Jul_4b	magic	1
M393	8	0	M393_19-Jul_4b	magic	1
M393	9	0.735294118	M393_19-Jul_4b	magic	1
M393	10	0	M393_19-Jul_4b	magic	1
M393	11	0	M393_19-Jul_4b	magic	1
M393	12	0	M393_19-Jul_4b	magic	1
M393	13	0.735294118	M393_19-Jul_4b	magic	1
M393	14	0	M393_19-Jul_4b	magic	1
M393	15	0	M393_19-Jul_4b	magic	1
M393	16	0	M393_19-Jul_4b	magic	1
M393	17	0	M393_19-Jul_4b	magic	1
M393	18	0	M393_19-Jul_4b	magic	1
