# Supplementary material for: An ABA-GA bistable switch can account for natural variation in the variability of Arabidopsis seed germination time
Source: eLife. 2021 Jun 1;10:e59485. doi: 10.7554/eLife.59485 (PMC8169117; doi:10.7554/eLife.59485)
Supplement: Figure 1—source data 2. [file elife-59485-fig1-data2.tds]

Magic_line	meanDAR	mean_median	mean_mean	mean_mode	mean_var	mean_cv	mean_ls	mean_sd	mean_range	mean_rel_range	mean_iqr	n	mean_percent	Group	Sowing_round
M101	33.8	4.93333333333333	6.57679285732748	4.625	64.54499241955	0.749644996334713	0.443516734898866	5.74809179604795	27.8166666666667	3.89466546289161	2.5625	5	67.2883392911898	MAGIC	NA
M103	28	3.83333333333333	4.3258486190175	3.33333333333333	2.03337808411647	0.3286251054134	0.266911806310633	1.41180484853848	7.33333333333333	1.6914536137707	2	1	40.7685992168751	MAGIC	NA
M104	28	3	3.22239983563423	3	0.526055228006522	0.210103570751621	0.147480449395406	0.690458326633223	4.75	1.47570113015341	0.25	1	77.0472038896119	MAGIC	NA
M106	40	3.16666666666667	3.62443760970869	3	1.75016952995474	0.34153305057091	0.241238422593518	1.25256366263317	7.83333333333333	2.15422857613101	0.833333333333333	1	75.1992037737286	MAGIC	NA
M107	37	4	4.24539087140511	3.8	2.0306867220734	0.324166018393751	0.226937361092665	1.37661678005344	10.8	2.53591281824931	1.8	1	91.3303065498187	MAGIC	NA
M108	28	3	3.05732153656092	3	0.0815909393406737	0.0914701909905397	0.043928994834828	0.280225099726998	3	0.979860594338247	0	1	99.546425042349	MAGIC	NA
M109	37	3.33333333333333	3.86802025048576	3.33333333333333	1.33637096234347	0.299799483213101	0.234434050186924	1.15545713382787	5.66666666666667	1.47985437946005	1.33333333333333	1	81.7795634373893	MAGIC	NA
M11	29.5	2.80555555555556	2.95764117161923	2.76388888888889	0.34285420998316	0.19813129250542	0.170093379844246	0.57693986555249	3.20833333333333	1.10788391504146	0.819444444444444	6	63.8845012235724	MAGIC	NA
M111	28	4.19444444444444	4.35940107329224	4.58333333333333	2.11612296294539	0.223018167918492	0.163990655046933	1.09044147832017	5.41666666666667	1.27171275964584	1.30555555555556	3	66.8844477018434	MAGIC	NA
M112	24	4.33333333333333	4.35702106465883	4.33333333333333	1.40408276107358	0.25899219035857	0.194703751804819	1.14397756767273	6	1.37496382800671	1.66666666666667	1	81.7516459818394	MAGIC	NA
M113	27	3	3.32079666984784	3	0.56505796389649	0.221257026859051	0.148365271918108	0.733588955129219	6.66666666666667	2.01415737037392	0.666666666666667	1	93.0659172016083	MAGIC	NA
M114	32.25	3.41666666666667	3.57163687621963	3.41666666666667	0.517108303436055	0.18951713333255	0.139516395377597	0.683742406492277	4.66666666666667	1.31813566267509	0.75	4	98.9193737422773	MAGIC	NA
M115	29	3.5	3.85186522414783	3.25	2.46247349713597	0.309796560566439	0.229854500752634	1.28997145368416	5.33333333333333	1.30346294068418	0.75	2	19.005785719571	MAGIC	NA
M116	37	3	2.88285251849744	3	0.123261567758435	0.121418568035395	0.0773411095914864	0.349312134950286	3	1.04095139009306	0	1	99.3591094254811	MAGIC	NA
M117	34	2	2.33509195979751	2	0.276215693253327	0.224721467510475	0.195163584324943	0.524737027805743	3.66666666666667	1.57150685720983	0.666666666666667	1	99.0960249042146	MAGIC	NA
M118	37	3	3.05201742043116	3	0.17601693008568	0.134400282866404	0.0649045800396202	0.410015223374683	4	1.31093976254292	0	1	97.374258940524	MAGIC	NA
M119	31	2.83333333333333	3.00548683711377	2.83333333333333	0.84005627732723	0.299302640837869	0.209113578289697	0.903065364520144	5.33333333333333	1.78031610126626	0.583333333333333	2	63.3398645959667	MAGIC	NA
M12	31.5	3.25	3.33216397832647	3.25	0.261842429570171	0.141946658274843	0.10469320688088	0.48214490369514	3.41666666666667	1.00484656962146	0.5	2	56.1251483012471	MAGIC	NA
M121	25	3	3.27267794406602	3	0.849853515418732	0.242224940067659	0.146819518202665	0.813531557592113	6.66666666666667	1.99850933303964	0.333333333333333	1	98.5703121285599	MAGIC	NA
M122	29	3	3.17673695806977	3	0.257703904022646	0.143064382649525	0.0912793496628969	0.460940538272845	4.33333333333333	1.35397106727492	0	1	99.1577660874648	MAGIC	NA
M123	36	2	2.07931877764533	2	0.0756584168813866	0.109193301153023	0.0640696973053487	0.231537363737259	2	0.957113495323568	0	2	99.6796084664093	MAGIC	NA
M124	34	2.5	2.46330161752352	2.5	0.271426264331922	0.210665770829704	0.196320785305786	0.518902170494002	3	1.22099953666252	1	1	99.0504304627442	MAGIC	NA
M127	34	3.33333333333333	3.67717399530765	3	1.83128809343405	0.365276519039962	0.294571054724592	1.34184278684484	8	2.18006306370332	1.58333333333333	1	81.9551357608288	MAGIC	NA
M128	25	3	2.92681051057466	3	0.125291453306835	0.115441610326072	0.0706249511936881	0.335087702589842	2.66666666666667	0.914171291359832	0	1	98.9313587601004	MAGIC	NA
M129	30	2	2.52793836987385	2	0.64524291255906	0.298919033994299	0.23919526496917	0.767840205379878	5	1.94963105281034	1	1	95.9344429721323	MAGIC	NA
M131	30	4.33333333333333	4.5968992248062	4.33333333333333	2.05578355373157	0.30486959250968	0.231439856063925	1.40791207568458	7.66666666666667	1.65989452235407	1.33333333333333	1	45.9834032502865	MAGIC	NA
M135	24	2	2.1848952484404	2	0.230774339767035	0.200576117196261	0.134091519956217	0.444570382676505	3	1.35690597324289	0	1	99.5910020449898	MAGIC	NA
M138	32	3	3.00965173552893	3	0.514945531204887	0.224858320592911	0.136528946237569	0.68461546738463	4.66666666666667	1.54072301451465	0	1	97.3894276976846	MAGIC	NA
M139	32	3.5	3.62250151625137	3.5	0.534538913374048	0.204265848109893	0.121188428422811	0.728632205676892	5.75	1.60229574564764	0.25	1	97.6412979811653	MAGIC	NA
M14	36	3.6875	3.73566316395084	3.375	1.25353592573973	0.286767179266436	0.221344829668998	1.07819674981969	6.25	1.65641228794324	1.03125	2	48.0643826501183	MAGIC	NA
M140	32	4	3.99451754385965	3.5	1.27903318077803	0.283055273459893	0.204319949357931	1.12995322614014	5	1.25189003436426	1.25	1	11.352751715446	MAGIC	NA
M141	35	6.61111111111111	7.14469491015173	5.77777777777778	6.2875751074818	0.353923919904173	0.300080363490084	2.50182557364017	9.77777777777778	1.37614065067393	3.88888888888889	3	27.2997147871508	MAGIC	NA
M142	33	3	3.22039516089048	3	0.258900811848982	0.156543569615303	0.115085131767086	0.505224392724153	3.66666666666667	1.14313781679009	0.333333333333333	1	98.4126984126984	MAGIC	NA
M143	30.3333333333333	4.55555555555556	5.56840198787516	4.33333333333333	33.4498059725565	0.842703909878041	0.398677896509899	5.07933454622163	33	5.65553746310459	1.77777777777778	3	97.624013130036	MAGIC	NA
M144	33	3.66666666666667	4.42175255646889	3.66666666666667	2.15524204695237	0.295034150023117	0.23837496471265	1.36371921366209	7	1.5433345852608	1.66666666666667	1	71.4521112096794	MAGIC	NA
M145	32	2	2.28393172099117	2	0.176335934693545	0.17774783419763	0.149635946068293	0.410284587231322	2	0.880416768658229	0.5	1	99.8447204968944	MAGIC	NA
M147	36	2.5	2.59554791110354	2.5	0.111090902140403	0.127570717005304	0.0795172853171945	0.311362545997736	2.83333333333333	1.10204551866512	0.166666666666667	2	99.2607088497499	MAGIC	NA
M148	30	2.66666666666667	2.81365144705339	2.66666666666667	0.29935202499827	0.197150877405078	0.17958724445275	0.54702287495435	3.66666666666667	1.30942191408327	1	1	98.6301369863014	MAGIC	NA
M149	33	3	2.80881389117571	3	0.255638424808238	0.179154809613904	0.12701115874047	0.497834437920127	4.33333333333333	1.54912334921556	0.333333333333333	1	99.3135387615355	MAGIC	NA
M151	31	3	3.0584214219633	3	0.112834278316453	0.108126199163194	0.0477180697153346	0.331324587991391	3.66666666666667	1.19715279945292	0	1	93.4420631557166	MAGIC	NA
M153	33	2.66666666666667	2.70177808941421	2.66666666666667	0.187690317970066	0.161700376651272	0.132863634380622	0.430515163900782	2.66666666666667	0.978920484320684	0.333333333333333	1	99.2771672771673	MAGIC	NA
M156	33	3	3.03617900931764	3	0.245813582829386	0.16298448721901	0.0795738251228779	0.494621157732438	4.33333333333333	1.42579589803401	0	1	93.81981909687	MAGIC	NA
M157	33	3	3.38047138047138	3	0.329235116735117	0.168530031596476	0.147353683673296	0.570839115352686	3	0.888096328774295	1	1	11.3866578463589	MAGIC	NA
M158	30	2.33333333333333	2.5046960450148	2.33333333333333	0.388357114763933	0.238888663241387	0.188873657288145	0.605582254590035	4	1.58168320087399	0.833333333333333	1	98.4065369452226	MAGIC	NA
M159	33	2.66666666666667	2.68216070225207	2.66666666666667	0.437059413850492	0.221625219359399	0.192675279465364	0.616891040577042	2.66666666666667	1.00365925783238	1	1	92.3449649203765	MAGIC	NA
M160	32	2.66666666666667	2.63844967962615	2.66666666666667	0.14995143064292	0.126863027649786	0.0564491023327449	0.353715490511588	3.33333333333333	1.23474447102726	0	1	98.4247267383117	MAGIC	NA
M161	32	4	4.20289860793116	4	1.01500209923197	0.236163912065227	0.17721131088456	0.995233726585383	6.25	1.48854595283116	0.8125	1	75.3625781182337	MAGIC	NA
M162	30	3	3.11561463014641	3	0.17266109019179	0.133011434391067	0.0816775166581282	0.414400257793473	4	1.28385754542487	0	1	98.9493949394939	MAGIC	NA
M163	30	3	2.86711271230057	3	0.106334404805976	0.0949495187214114	0.0755308863758113	0.265657229793068	1.66666666666667	0.587262837059398	0	1	99.2814934192855	MAGIC	NA
M164	35	3	3.29313233771057	3	0.411784108667101	0.192554238514594	0.146803466858217	0.634589120268344	5	1.51648812349689	0.666666666666667	1	98.7158568296625	MAGIC	NA
M166	31	4.66666666666667	4.48624190209043	4.66666666666667	0.89999962630008	0.211982958026322	0.154806840362581	0.946081040198418	6	1.33285674727093	1	1	45.6629418514965	MAGIC	NA
M167	30	3.66666666666667	3.51780147956619	3.66666666666667	0.260211592141342	0.145044893604057	0.140901322146091	0.510066837321445	2.66666666666667	0.758744534176001	1	1	61.5648316192781	MAGIC	NA
M168	30	3	2.95099807662333	3	0.143563549633737	0.126808445431546	0.0739734442444677	0.372491169188356	3	1.01815758663525	0	1	100	MAGIC	NA
M17	26	2.14285714285714	2.13195669633012	2.14285714285714	0.132987634426695	0.144183319251417	0.0764672076224899	0.315909837348667	2.85714285714286	1.33403258310376	0.142857142857143	1	98.5179786200194	MAGIC	NA
M171	33	3	3.19256750036867	3	0.237623383052428	0.146984238233272	0.103969166643724	0.47320730990894	4	1.24577551496529	0.666666666666667	1	99.2673992673993	MAGIC	NA
M174	29	3	4.19039196003061	3	12.1227815889154	0.680753049891363	0.386803956274111	3.01145922038851	14.75	3.43026602299369	1	2	40.0269154308594	MAGIC	NA
M176	33	3	3.31682495734577	3	0.853301905717244	0.27463018928489	0.199857192080173	0.913865541295774	5.66666666666667	1.70229065124769	0.416666666666667	1	92.9607318161535	MAGIC	NA
M177	35	3	2.59341349001238	3	0.265085130062174	0.198207662913303	0.189473914916656	0.514190724055975	2.66666666666667	1.02336401042248	1	1	98.7282623124917	MAGIC	NA
M178	33.6666666666667	4.71428571428571	8.74742093171726	4.17460317460317	130.356142051931	0.906094917404642	0.613945606590347	9.32140922371481	37.031746031746	4.25170220686571	4.93253968253968	3	87.2882051982767	MAGIC	NA
M179	35.4	3.2	3.31099909316375	3.13333333333333	0.556723525861888	0.213486320708544	0.158527870136124	0.712794025511608	4.25	1.27958320972515	0.783333333333333	5	53.8164383084037	MAGIC	NA
M18	24	2.5	2.49537920118542	2.5	0.30335133242645	0.218315842871112	0.170759881634234	0.537635989656154	3.5	1.44187398849193	0.5	1	98.6185383244207	MAGIC	NA
M180	32	2	2.33614738167584	2	0.22184977441386	0.197311047640887	0.172008349055855	0.463942179681747	3	1.27487189857432	0.666666666666667	1	98.3127430793869	MAGIC	NA
M182	35.1428571428571	9.61904761904762	12.7453160853039	7.4047619047619	149.605598506396	0.879400803370034	0.663303888274559	10.8091257475617	38.7857142857143	3.56735111672425	13.047619047619	7	74.7660546628704	MAGIC	NA
M183	33	4.33333333333333	4.6677577165382	3.66666666666667	1.95377820011966	0.296033677608428	0.238717414996785	1.38179373077921	6.66666666666667	1.43040051317211	1.91666666666667	1	22.8201985922574	MAGIC	NA
M186	33	3	2.86581633700301	3	0.165718232021205	0.141243369330449	0.0930539231648111	0.402324051227671	3.33333333333333	1.16042223552851	0.333333333333333	1	99.6176448224547	MAGIC	NA
M188	36.5	3.5625	3.6796013904641	3.52083333333333	0.389754202057982	0.166657863079072	0.132790010264797	0.61081407378721	3.3125	0.902015778565961	0.791666666666667	4	32.9222468919248	MAGIC	NA
M189	31	4	3.9849015682349	4	0.737850013706712	0.215339280780076	0.151782834122559	0.858188052937053	4.66666666666667	1.17067267551719	1.16666666666667	1	65.5605285592498	MAGIC	NA
M190	34	4.2	4.46218547410037	4	1.15598658602025	0.237506588399447	0.176749397955947	1.06312393358515	6	1.34926253800476	1	1	39.5247160419338	MAGIC	NA
M191	35	4	3.6348586536506	3.83333333333333	0.491746471988737	0.188326225380337	0.161864485110739	0.68751444586753	4.66666666666667	1.27347656581066	1	1	98.0952380952381	MAGIC	NA
M192	29	4.33333333333333	4.35770735770736	4.33333333333333	0.906342326510394	0.218504087583129	0.181915189564207	0.950188737414334	4.66666666666667	1.07724386073308	1.33333333333333	1	39.8264012113469	MAGIC	NA
M193	33	2.66666666666667	2.74094814094444	2.66666666666667	0.136615694502198	0.130097340704801	0.0975646779392138	0.340242943623952	3	1.10966903623745	0.333333333333333	1	99.780701754386	MAGIC	NA
M194	33	3	2.96723443748724	3	0.134910528092005	0.120343075321209	0.0698432599167275	0.353696007498848	3.33333333333333	1.12301821560071	0.166666666666667	2	99.8945147679325	MAGIC	NA
M195	33	6.5	6.39545454545455	6.66666666666667	2.66045270518955	0.249313969870571	0.199301279874132	1.60269473354943	6.33333333333333	0.990922734384752	2.25	1	11.091656870017	MAGIC	NA
M197	30	3	2.87937830788966	3	0.192968008803794	0.15062401022702	0.094701064056889	0.428667945595815	3.66666666666667	1.28987257339327	0.333333333333333	1	79.0212488129155	MAGIC	NA
M198	34	3	3.24570042805855	3	0.388585547096246	0.187105451380685	0.124942145480237	0.611590455335204	5.33333333333333	1.64114536528734	0.333333333333333	1	97.0628019323672	MAGIC	NA
M199	33	3	2.90027320942435	3	0.133250821622274	0.120223136567227	0.0729140200112084	0.346234837482312	3	1.03116767955478	0	1	98.892568618596	MAGIC	NA
M20	28	3	3.01923076923077	3	0.875897435897436	0.309850621668663	0.177052904901006	0.935617459883147	5	1.65400843881857	0.5	1	19.2438361483207	MAGIC	NA
M200	33	4	3.83685121226739	4	0.362873829567169	0.156802483968066	0.111058543223258	0.601455113744399	4.33333333333333	1.1321117127562	0.333333333333333	1	98.4437305131028	MAGIC	NA
M203	29	2.83333333333333	2.7959672981286	2.83333333333333	0.098719201984662	0.10539145189784	0.0736165430278269	0.276988991428528	2.5	0.899460321510644	0.166666666666667	2	100	MAGIC	NA
M205	31	3	3.128803490207	3	0.372649383025297	0.19299320507159	0.135201909613548	0.604938539083641	3.66666666666667	1.17454009405229	0.333333333333333	1	68.5902541611997	MAGIC	NA
M206	32	3	2.86791954413374	2.5	0.792421097651484	0.306802802503877	0.240161642828671	0.883210953738274	4.66666666666667	1.6270489295877	1.33333333333333	1	54.8932344143214	MAGIC	NA
M207	32	3.33333333333333	3.17234442614337	3	0.265058847904053	0.157715775745399	0.107732984299918	0.503876860668195	3.66666666666667	1.14018028148168	0.333333333333333	1	85.0955676199664	MAGIC	NA
M209	33	7	7.10793650793651	7.33333333333333	3.81396916490173	0.270826134514503	0.209359191374352	1.9310221229497	9.33333333333333	1.31054827450708	2.33333333333333	1	28.2562793432806	MAGIC	NA
M21	25	2	2.20476960090221	2	0.263256248548159	0.229407313267	0.150931710913822	0.507447642748765	4	1.80985083424698	0	1	92.9181338216625	MAGIC	NA
M213	33	3	3.10452327747226	3	0.128127488284192	0.110024874343203	0.0616245600320833	0.343449174033378	3.66666666666667	1.1755109420918	0	1	99.8116760828625	MAGIC	NA
M215	31	3.25	3.62745098039216	3	0.852941176470588	0.254639126396013	0.212135823032641	0.923410824800377	4	1.10283159463487	1	1	11.1204819277108	MAGIC	NA
M218	33	3	2.97242277124818	3	0.233825216525747	0.163347055529254	0.126398306061327	0.476320763967908	3	1.01608484744764	0.333333333333333	1	62.688405829959	MAGIC	NA
M220	30	2.75	2.70582024949804	2.75	0.204749900394143	0.16007083787401	0.132003228822142	0.419607158627564	2.75	1.03345294851795	0.5	1	84.0411105282586	MAGIC	NA
M221	27	2	2.28539388842164	2	0.354672493988294	0.257076027975366	0.191039249808845	0.589227860086175	4	1.74092721633705	0.5	1	97.9495798319328	MAGIC	NA
M223	29	4	4.26875	3.5	1.00274122807018	0.236534020550735	0.197056277056277	1.00128272686848	4.5	1.05281385281385	1.5	1	11.4787581699346	MAGIC	NA
M224	32	2	2.05369346415858	2	0.0511651222689968	0.109964570610034	0.0494296262798641	0.225868009006152	2	0.973863907567162	0	1	100	MAGIC	NA
M229	32	2	2.0928226363009	2	0.086859743494385	0.135450709544514	0.0772786385930458	0.285051903525495	2.33333333333333	1.11621021233172	0	1	100	MAGIC	NA
M23	24	2	2.11207841722548	2	0.137534186656139	0.147388420210151	0.0876933554818199	0.317510452541339	2.75	1.29267007268454	0	1	98.9230600453448	MAGIC	NA
M231	27	3	2.85463854898898	3	0.526991995579297	0.253135279569267	0.177120302229566	0.719921235473986	5	1.74746522399563	0.666666666666667	1	99.7942386831276	MAGIC	NA
M232	26	3	3.02979525459571	3	0.369424194350134	0.190609791271901	0.0879586054222902	0.576852467219021	5	1.65344290075457	0	1	92.3673904019348	MAGIC	NA
M233	28	3	3.07457013112914	3	0.123515840426641	0.112711482770879	0.0572147625507688	0.34744228756432	3.5	1.14199127420383	0	1	100	MAGIC	NA
M234	28	4	4.15523042848624	4	0.78500945863007	0.20694420384434	0.158217772382324	0.866856449968567	5.33333333333333	1.28955187847048	1	1	32.9152882302489	MAGIC	NA
M237	28	3.33333333333333	3.36770956032047	3.33333333333333	0.32508565337429	0.168887052078717	0.134072710025508	0.568835598220453	3.33333333333333	1.00255522099629	0.666666666666667	1	84.5662978244561	MAGIC	NA
M239	33	4	4.23121263838954	4	7.04300394090493	0.413756334621058	0.189006033608781	1.97672250585036	14	2.87331935886185	1	1	89.3206376597231	MAGIC	NA
M24	30.4	3.8	4.01557323492299	3.38333333333333	2.24794097834855	0.34251655287192	0.271412985718338	1.39847630315661	6.7	1.72125080921958	1.98333333333333	5	66.086740919685	MAGIC	NA
M240	27	2.66666666666667	2.65987992096063	2.66666666666667	0.406659653377449	0.231496625331412	0.190883223794084	0.622470322848739	4	1.45201814428509	0.75	1	99.2741061755146	MAGIC	NA
M241	30	2.25	2.31834934602624	2.25	0.100772099152494	0.122635821624274	0.0635766754250024	0.275716089157075	2.91666666666667	1.2755144211852	0	4	99.7504750648869	MAGIC	NA
M242	31	3	3.38579815246482	3	1.35646092686591	0.324123852405046	0.194774076945059	1.11053614172447	8.33333333333333	2.4725145015134	0.666666666666667	1	60.8589873728527	MAGIC	NA
M245	27	2.66666666666667	2.67833661657737	2.66666666666667	0.363583170457328	0.224461858228928	0.18829273234794	0.598305019649748	4	1.49497379930716	1	1	96.4110263402478	MAGIC	NA
M248	31	3.33333333333333	3.51218776916451	3	0.615323088501434	0.224311360148601	0.1831080519232	0.78354923306239	4.33333333333333	1.23523969718257	1	1	61.341285227488	MAGIC	NA
M25	28	2	2.21107463964607	2	0.205380444624318	0.199708361913985	0.136760780968393	0.444014086758185	3.5	1.58828925246357	0.5	1	99.5535714285714	MAGIC	NA
M250	31	4	4.55849037174338	4	1.64423603275387	0.272413006507041	0.208622250302129	1.24955370432934	6.66666666666667	1.4606076543718	1	1	60.5427117103659	MAGIC	NA
M251	26	3.33333333333333	3.69519686857687	3.33333333333333	1.14693394320997	0.261423551270539	0.19700446062382	0.996787540157761	5.33333333333333	1.43211451233728	1	1	65.0525396329832	MAGIC	NA
M254	27	3	2.89954489206104	3	0.262166744630034	0.176920644742294	0.119069965240268	0.511697825128831	4	1.3821646380013	0.333333333333333	1	100	MAGIC	NA
M255	30	6.5	6.67110743988365	6	5.20517206416603	0.341379577128753	0.267318521692745	2.26389815344933	9.66666666666667	1.45051299217904	2.91666666666667	1	27.2380813812503	MAGIC	NA
M256	25	3	2.95208695122666	3	0.336250000352083	0.186724075860877	0.11570284956784	0.55146762442088	4.16666666666667	1.4073377796308	0.166666666666667	1	87.2392465618033	MAGIC	NA
M26	27	4	4.7327879990725	3.75	9.11265792473939	0.397189373502438	0.316765313280269	2.23662833168138	9	1.77418625965066	3.25	1	64.0206173255579	MAGIC	NA
M261	31	2.66666666666667	2.6214543705157	2.66666666666667	0.243343356553321	0.188305684991681	0.170316788146776	0.488784186165129	3	1.16516147838847	0.666666666666667	1	99.7762863534676	MAGIC	NA
M264	29	3	3.23228527172849	3	0.220460754547947	0.141670002213772	0.109336633826051	0.460162298937325	3	0.927331359559276	0.333333333333333	1	100	MAGIC	NA
M265	30	2	2.16	2	0.135483870967742	0.170408026590154	0.124444444444444	0.368081337434733	2	0.925925925925926	0	1	99.2063492063492	MAGIC	NA
M266	31	4	4.1572765272362	4	1.05944412724886	0.240935201571051	0.175957220716571	1.00714822771428	5.33333333333333	1.2771347529166	1	1	47.2303515104217	MAGIC	NA
M276	27	3	3.13042854119673	3	0.221342756523479	0.149783555341394	0.100101270809858	0.469178204872133	3.66666666666667	1.17385186882479	0.333333333333333	1	100	MAGIC	NA
M278	27	3	3.20224719101124	3	0.388243509172856	0.194579574117351	0.146303962152572	0.623091894645449	4	1.24912280701754	1	1	99.4413407821229	MAGIC	NA
M283	29	3	3.16304347826087	3	0.577520305781175	0.24025833758127	0.173539518900344	0.759947567784236	4	1.26460481099656	0.25	1	74.1935483870968	MAGIC	NA
M285	28	4	4.99676545195413	3.66666666666667	6.55757122530799	0.478440823002188	0.357725458367614	2.44060100242975	12	2.42741375183736	2.66666666666667	1	65.8286784079596	MAGIC	NA
M286	33	3	3.01876985218444	3	0.737296057136091	0.220489356205841	0.117431498499806	0.67849408881202	5.91666666666667	1.94711329770582	0.25	3	96.8013735117995	MAGIC	NA
M287	27	3	3.26239316239316	3	0.303733693207377	0.162004760001788	0.13155760228931	0.5304249322347	2.66666666666667	0.815422517861542	0.666666666666667	1	13.2823125931421	MAGIC	NA
M289	31	2.75	2.77500278992214	2.75	0.454865644011286	0.243854131129873	0.175674981002912	0.673074559492769	4.5	1.62590120545856	0.5	1	92.3970007551775	MAGIC	NA
M290	24	3	2.6728385336393	2.66666666666667	0.340013535190801	0.216877836536901	0.190255760240239	0.578393432494125	3.33333333333333	1.24639683996329	1	1	82.0108208918501	MAGIC	NA
M291	32	4	4.83333333333333	4	2.41608391608392	0.319140982787675	0.244444444444444	1.54617811070398	7	1.45	1.5	1	15.5529953917051	MAGIC	NA
M292	31	3	3.33302496343555	3	0.352948368394568	0.176721210917337	0.13651269215222	0.590521117784648	3.66666666666667	1.11560096395788	0.666666666666667	1	91.0806354916067	MAGIC	NA
M293	32	3	2.63058027272465	3	0.287366097416834	0.203730437016893	0.187167230503887	0.535585482393736	3	1.14164433970396	1	1	99.2589387136907	MAGIC	NA
M295	28	3	3.09860789568215	3	0.925775205269021	0.281914185166485	0.177413903687746	0.894270724034807	6.8	2.15884645572262	0.4	1	97.6200019464429	MAGIC	NA
M296	28	3	3.01453942142641	3	0.283644121722474	0.173934237175784	0.0950604749614829	0.525812592671882	4.6	1.53243464494612	0.2	1	97.1738918956488	MAGIC	NA
M30	27	4	3.92871066555277	4	0.555389006704796	0.187763841228046	0.14437330414774	0.737430652657121	3.75	0.957480636052065	0.5625	1	24.2284908756871	MAGIC	NA
M301	31	3.66666666666667	3.73427750410509	3	0.760884681016527	0.23001720052376	0.191939347944317	0.862427545230737	3.66666666666667	0.980476569608735	1.08333333333333	1	24.8813766469589	MAGIC	NA
M302	32	3	3.16109876224118	3	0.188971599113478	0.137241978108768	0.0936860568236162	0.433961426222943	4	1.26542862050038	0	1	97.891181601983	MAGIC	NA
M303	27	3.66666666666667	3.92173968601961	3.66666666666667	1.59771942529362	0.312271115799311	0.212204140557865	1.23816766928245	8.33333333333333	2.12183655122667	1.33333333333333	1	86.3703950922114	MAGIC	NA
M304	26	3.33333333333333	8.32722337011906	3	230.545288807934	1.73395945484646	0.888474607979681	14.3327961744398	67.6666666666667	9.13696229812866	1.79166666666667	2	80.2835344777545	MAGIC	NA
M305	29	3.5	3.71870833128573	3.25	2.54626985904149	0.412769905373732	0.272123190265072	1.5423406864903	8.75	2.3509360650111	1	1	89.9647887323944	MAGIC	NA
M308	28	3.33333333333333	3.40974975730979	3	0.339888282673158	0.166786643562905	0.142120218071518	0.572598052673371	3.66666666666667	1.07321233172712	0.666666666666667	1	87.7561147394033	MAGIC	NA
M310	26	3	3.05607633076666	3	0.215195001014627	0.145855230568048	0.0724056917275309	0.446608806482804	4	1.30893318038428	0	1	92.8499604970193	MAGIC	NA
M311	28.5	3.83333333333333	17.5183845441114	2.91666666666667	504.361241652384	1.30697600363929	1.09435650986059	21.9751940007201	62.1666666666667	3.80374154274432	30.375	2	41.34362386315	MAGIC	NA
M312	27	2.66666666666667	2.54806313539635	2.66666666666667	0.248335016302513	0.190510168737133	0.152755130357303	0.489768446845001	3	1.15696334700282	0.666666666666667	1	96.6481264637002	MAGIC	NA
M314	32	3	2.86930766382821	3	0.171649766312024	0.141917811053463	0.113999899155133	0.395997991552792	2.5	0.888994393199494	0.5	1	98.8778957528958	MAGIC	NA
M315	28	2	2.12686761229314	2	0.122005514212849	0.164158344399304	0.104241588731678	0.349152791336197	2.33333333333333	1.09864005760219	0	1	39.5713456126147	MAGIC	NA
M316	28	4	3.97254901960784	3	1.96793971319871	0.353075757606057	0.254888131851262	1.40263905339101	6.5	1.63853849499783	1.5	1	39.8717948717949	MAGIC	NA
M317	25	3	2.87547286821705	3	0.207788533637032	0.157131966550053	0.102432003932806	0.450377112663234	3	1.03247319429716	0.333333333333333	1	97.5469502221692	MAGIC	NA
M319	28	2	2.54913334658793	2	0.432004665365045	0.256273003622793	0.225527443252799	0.654091513640611	4	1.56523434944381	1	1	82.3440075598833	MAGIC	NA
M320	26	3	3.125	3	0.516666666666667	0.230014492297043	0.175	0.718795288428261	3	0.96	1	1	11.9402985074627	MAGIC	NA
M321	32	2.25	2.3539528639706	2.25	0.324269200601734	0.239099658049422	0.170827970353555	0.561732546559145	4	1.71132106224108	0.5	1	91.7544104916031	MAGIC	NA
M322	27	3	2.92701126034459	3	0.205748422769585	0.15505142107706	0.0889570698186518	0.453150989639094	3.33333333333333	1.13661402157165	0	1	95.3816526839603	MAGIC	NA
M323	29	2.33333333333333	2.49468046146821	2.33333333333333	0.284442827708075	0.214375391459502	0.194023193738206	0.531990429879957	3	1.21053918277653	1	1	93.3131088414737	MAGIC	NA
M325	33	3	3.22048305727213	3	0.488284760399493	0.214237046813732	0.153644752436198	0.690375731216361	4.8	1.492074869974	0.4	1	88.5957583438234	MAGIC	NA
M326	32	3	3.02808177336272	3	0.133232415208925	0.118246717188316	0.0500367703239897	0.357806417194059	4	1.32123960695389	0	1	97.0243750461259	MAGIC	NA
M327	31	2.66666666666667	2.78962114218826	2.66666666666667	0.299910770285937	0.198811974011332	0.137293703683928	0.544501315924582	4	1.44915072910841	0.333333333333333	1	90.7588561673069	MAGIC	NA
M328	29	2.66666666666667	2.7003359878388	2.66666666666667	0.356324419429484	0.217833044703924	0.147765277721412	0.588217077309146	4.33333333333333	1.61084244326764	0.333333333333333	1	92.2728667181065	MAGIC	NA
M329	30.3333333333333	3.22222222222222	3.27878999675349	3.11111111111111	0.478750844731711	0.19346835417507	0.132129471763642	0.644106199509649	4.625	1.40350084347489	0.597222222222222	6	95.926234104077	MAGIC	NA
M330	27	3.5	3.63997767139643	3.25	0.994720149139817	0.254560600378765	0.193720763370107	0.942606459195742	7	1.89079901611791	1.1875	1	94.3447550396199	MAGIC	NA
M332	39	2	2.32984318200371	2	0.238171858778437	0.208280770660625	0.187740138733764	0.486112739262731	3	1.27855987655849	1	1	98.7240895305411	MAGIC	NA
M334	32	3	2.76505960264901	3	0.438515416933704	0.236076144515929	0.185532348728916	0.655082714610954	4	1.4370682480233	1	1	95.9558823529412	MAGIC	NA
M336	39	3.5	5.3416320649831	3	21.5495709509031	0.573535426087063	0.417815544917033	3.59281224447752	14.3333333333333	2.82442419613044	4.41666666666667	1	39.5432327690814	MAGIC	NA
M337	40	3	3.18994708994709	3	1.03825903344031	0.307353825253037	0.210083655319811	0.984319123877359	6.33333333333333	1.97251683038317	0.666666666666667	1	68.4252597921663	MAGIC	NA
M338	34	2	2.19977192369173	2	0.232683772560676	0.208235217031754	0.14276147610877	0.462501896920173	3.5	1.58071944796132	0.166666666666667	1	95.7129252415165	MAGIC	NA
M339	40	3	2.91709955169715	2.83333333333333	0.455877712584466	0.229205390068992	0.161497591463871	0.663385991382016	3.33333333333333	1.14358678955453	0.5	1	20.5306416264134	MAGIC	NA
M34	27	3.33333333333333	3.63510266028136	3.33333333333333	0.657043814777267	0.222644557006947	0.18392746640905	0.809279012735247	5	1.37661462408879	1	1	89.7480790550098	MAGIC	NA
M342	39	2.8	2.67131672078043	2.8	0.377075173805835	0.227154211046354	0.186468438599305	0.608211432711837	4.2	1.56477227879676	0.8	1	99.2618637946112	MAGIC	NA
M344	31	3.5	3.63678515092384	3.3	1.96878979721977	0.350628994045352	0.257015650969538	1.30950046513916	7.25	1.9811996726737	1.45833333333333	5	65.0493999102156	MAGIC	NA
M345	30	3	2.89340700125347	2.66666666666667	0.455326575896225	0.233644439968894	0.191971680808005	0.672980858649301	4	1.3816730645249	1	1	97.2455648926237	MAGIC	NA
M346	33	2.8	2.75098506429532	2.8	0.367152851364912	0.214955751065029	0.168500783099958	0.581570193382699	4	1.46531379941885	0.8	1	97.3926927493739	MAGIC	NA
M347	38	3	2.98997389803934	3	0.429815342886352	0.212992879601838	0.154691094836343	0.639010777594057	4.66666666666667	1.55147677471414	0.5	1	95.7704486569457	MAGIC	NA
M348	35	2.5	2.45253822076209	2.5	0.272631068432583	0.213285157250834	0.168494072179515	0.520830205290987	3.5	1.4281899502062	0.5	1	96.8059643729287	MAGIC	NA
M349	34	2.33333333333333	2.53713118271022	2.33333333333333	0.405426873062789	0.247060253557615	0.212424143624402	0.628351035416955	3.66666666666667	1.43306997908604	1	1	95.5186968618414	MAGIC	NA
M351	38	3.33333333333333	3.8528915477834	3	3.33668271443237	0.430816461173035	0.289378975066964	1.69265351716444	9.66666666666667	2.44790981810213	1	1	36.6575733396591	MAGIC	NA
M353	31	2	2.32117321830522	2	0.256752834260009	0.217688514830429	0.191848875043628	0.505675105065178	3	1.29285718980669	1	1	99.1203914384507	MAGIC	NA
M355	33	2.33333333333333	2.52141212347523	2	1.15250155797793	0.36839595974697	0.221313319261686	0.972286396396169	8.33333333333333	3.15057355752953	0.666666666666667	1	92.8618728756263	MAGIC	NA
M358	38	2.33333333333333	2.47505440605887	2.33333333333333	0.257450770480553	0.207257148347218	0.162174253065945	0.507327007651519	3.33333333333333	1.35978682654082	0.333333333333333	1	97.9852846896662	MAGIC	NA
M360	40	3	2.85877192271424	3	0.30218521221462	0.193203161545991	0.127592509565644	0.549381552752159	5	1.73760023832718	0.333333333333333	1	95.7689780712895	MAGIC	NA
M362	34	2	2.19839605848697	2	0.198661770099489	0.201795591518482	0.144929407687805	0.444179142535993	3	1.36547209198757	0.333333333333333	1	94.1351527998587	MAGIC	NA
M363	35	3.33333333333333	3.5568359015862	3.25	1.22540563888976	0.306770655169783	0.227595415207344	1.08873958629524	6.16666666666667	1.71696633362482	1.33333333333333	1	40.53372152396	MAGIC	NA
M364	30	2	2.30121520106054	2	0.205008599366867	0.187317463188012	0.154339296505377	0.437614991942226	2.5	1.07586676073372	0.5	1	97.4088050314465	MAGIC	NA
M365	36	3.2	3.34743570501696	2.8	1.19985844619247	0.313252138259115	0.225579371008669	1.0624832732678	7.6	2.22358576636002	1	1	92.6799317334897	MAGIC	NA
M366	33	2.5	2.45792025712762	2.33333333333333	0.231103751953084	0.195853226542865	0.170985720162949	0.478454990182191	3	1.22959216536787	0.5	1	99.5500332361814	MAGIC	NA
M367	32	3	2.88374292660778	3	0.625974740431977	0.269021999640505	0.201108560462163	0.780721892339254	5	1.72303985246025	1	1	81.0483184333759	MAGIC	NA
M368	34	2	2.32402454058313	2	0.271489841953659	0.217120603531841	0.178356218022609	0.508548112032573	3.2	1.36963868249622	0.7	1	76.7456326690454	MAGIC	NA
M369	34	2	2.17920824651665	2	0.225105776758761	0.193243496033932	0.126495444685051	0.430847869095521	3.5	1.58272349823598	0.25	1	98.3980117379327	MAGIC	NA
M37	24	2	2.09218603716986	2	0.105808963158657	0.137592652457699	0.0754422267852688	0.292224757960861	2.66666666666667	1.26215608465608	0	1	97.2727272727273	MAGIC	NA
M370	30	3.5	3.71451223195409	3	0.90024213312787	0.255496650129802	0.197723945839423	0.948800969704239	5.5	1.4828407224959	1	1	65.2792074112198	MAGIC	NA
M371	43	3	2.73950216783528	3	0.386130001161395	0.226086803681441	0.189669835965453	0.619124843901495	3.33333333333333	1.2140072628697	1	1	98.6789772727273	MAGIC	NA
M372	40	2	2.17702730259431	2	0.202606927246102	0.206342473288033	0.138294936242808	0.449215758246029	3	1.37802719573666	0	1	85.1804373787132	MAGIC	NA
M373	33	2	2.0843403252774	2	0.0918949815068146	0.139009652832782	0.0730948418090876	0.291208495054608	2.33333333333333	1.11566970644626	0	1	98.0216590174939	MAGIC	NA
M375	40	3.33333333333333	3.33083333333333	3.33333333333333	0.692210702408142	0.248174763893793	0.16587308485447	0.817664836209141	4.66666666666667	1.433862306119	0.666666666666667	1	31.8015938769874	MAGIC	NA
M377	32	3	3.20795933269094	3	0.647481734793722	0.249251564909879	0.167748032334896	0.800079635045442	6.33333333333333	1.97349567923575	0.333333333333333	1	83.5268942848457	MAGIC	NA
M378	35	3	3.19970128110372	3	0.972018087528051	0.301401971439321	0.211438943446351	0.955772523765659	5.6	1.76853449248695	1.05	1	47.4850446944263	MAGIC	NA
M379	38	2.5	2.63310185185185	2.5	0.406159531451588	0.243207605700458	0.183656693158797	0.636992616891583	5	1.91444600280505	0.625	1	90.5096476510067	MAGIC	NA
M38	27	2.25	2.39822137912026	2.25	0.312571173548919	0.226670014789967	0.183416531130754	0.548397475013496	3.5	1.4618920262	0.5	1	94.4008645738025	MAGIC	NA
M380	31	4	3.81333333333333	3	1.20792792792793	0.288214443748137	0.215664335664336	1.0990577454929	7	1.83566433566434	1	1	64.1025641025641	MAGIC	NA
M381	29	2.33333333333333	2.38644506891476	2.33333333333333	0.208287814283826	0.185117513132254	0.153595966210322	0.446394292179534	2.66666666666667	1.09332861762587	0.666666666666667	1	94.6990740740741	MAGIC	NA
M382	30	2	2.23668668668669	2	0.383354742951041	0.253848097417534	0.165382569093639	0.574511658877252	4.66666666666667	2.05559407128982	0.0833333333333333	1	97.5308641975309	MAGIC	NA
M385	33	3.33333333333333	4.99678827963872	3.33333333333333	66.8233674598329	0.737472256272287	0.43466259445165	5.15362100372503	21.3333333333333	3.08423177751881	1.33333333333333	1	58.153614368633	MAGIC	NA
M388	29	3.33333333333333	3.32724226655231	3.33333333333333	0.354414571862847	0.173194181809229	0.140172591466374	0.580852168974324	3.33333333333333	1.00608293753149	0.666666666666667	1	81.1996020165311	MAGIC	NA
M389	31	2	2.35395150426583	2	0.724268335898331	0.36051656334328	0.219931938845807	0.844227638345319	7	3.00738450447672	0.333333333333333	1	99.2735992101273	MAGIC	NA
M39	24	3.25	3.6352686317442	3	1.35653844517839	0.316869355138434	0.234364110067615	1.15507253825058	7.5	2.08582663336799	1.25	1	96.2538665869533	MAGIC	NA
M390	30	3.5	3.48060543404843	3.25	0.491089545501967	0.201276476487022	0.169133390501949	0.695616753745301	4.25	1.20534972364665	1	1	81.3463767738041	MAGIC	NA
M391	31	3	2.78172156103699	3	0.293367884351158	0.189932043738464	0.147457574051945	0.530058039230445	3.66666666666667	1.31198223912259	0.666666666666667	1	99.2939244663383	MAGIC	NA
M392	32	3	3.34692190446666	3	0.533076351043103	0.216581899596562	0.177106297069508	0.722936097844441	4.25	1.26978347538236	1	1	32.9088869590389	MAGIC	NA
M393	29	3.66666666666667	4.09286040932804	3	3.24875781656223	0.421604599058157	0.264880207133753	1.75075682269436	14	3.42679518635684	1.33333333333333	1	96.2441795159237	MAGIC	NA
M395	31	3.2	3.34180437680877	3.2	0.315113214632541	0.167730717891261	0.139920324888283	0.559722215913222	3.8	1.15778222520485	0.8	1	99.559631940371	MAGIC	NA
M396	29	5.25	5.56441163003663	5.25	2.18352621116581	0.266242969719063	0.201591384177992	1.4757985296362	7	1.25990060570596	1.5	1	36.3255718954248	MAGIC	NA
M397	30	3	2.98963538054325	3	0.146091697136888	0.121318045091208	0.0597049637033267	0.360129315473763	3.33333333333333	1.11852587991718	0	1	86.8111999979654	MAGIC	NA
M398	32	2.33333333333333	2.55688293188293	2.33333333333333	0.330288144554387	0.224528697141517	0.205573113017776	0.57281083255888	3.66666666666667	1.43215178369824	1	1	96.0680029894698	MAGIC	NA
M4	27	4.25	4.65846496897448	4.5	2.61024700164027	0.346439923221885	0.255528384275246	1.5961413007751	9.75	2.16104123317397	1.6875	1	95.6114771488799	MAGIC	NA
M40	33	2.53333333333333	2.59842446429631	2.53333333333333	0.25154715066375	0.194256763735061	0.163381177014476	0.498594521784124	3.25	1.24631706094299	0.666666666666667	5	99.3089634277956	MAGIC	NA
M400	32	3	3.69613768584357	3	1.59625247301718	0.32847040542832	0.242370784455399	1.22723705673853	5.25	1.40609931056333	1.25	1	30.4056208596609	MAGIC	NA
M401	31	3	3.19536416847007	3	0.293384575087178	0.167619699304162	0.118003875516759	0.535442378714135	4	1.25403449499437	0	1	89.6793852676206	MAGIC	NA
M402	26	3.66666666666667	4.081170668607	3.66666666666667	0.826954981696156	0.225368413586552	0.167657005170079	0.90673759796778	6.33333333333333	1.63010610808731	1	1	72.7693710864578	MAGIC	NA
M403	33	3	3.26158678557308	3	0.283463444847416	0.163246361332286	0.126879650044794	0.532371043215715	3.33333333333333	1.02337329024619	0.333333333333333	1	81.2066940692895	MAGIC	NA
M409	32	3	3.31238040566399	3	0.281317443590533	0.158066384266318	0.134481695535443	0.524983800096665	3.33333333333333	1.00811186416118	0.666666666666667	1	89.1546462975034	MAGIC	NA
M413	29	2.33333333333333	2.41661186339494	2.33333333333333	0.256705922207569	0.19835829549435	0.13641762168891	0.471799937704145	3.66666666666667	1.56433982217023	0.333333333333333	1	99.8971193415638	MAGIC	NA
M414	32	2.33333333333333	2.37435708397971	2.33333333333333	0.230489212223269	0.20192410559729	0.185657101801412	0.479233318608641	2.33333333333333	0.987923942354322	1	1	98.6486486486486	MAGIC	NA
M415	32	3	3.38360794747324	3	0.442938346091901	0.196774176254056	0.158606439083934	0.665049698237378	5	1.48342337500922	0.666666666666667	1	69.0231015465309	MAGIC	NA
M416	32	2.8	3.08344883311057	2.8	0.922721566331653	0.276173595448149	0.198241046850879	0.863235490540424	6.8	2.18588620576914	0.8	1	95.6344382211946	MAGIC	NA
M418	30	2.75	2.86449543587895	2.75	0.281442263199265	0.176030059452919	0.1338777770945	0.502446561249036	3.25	1.11553183449839	0.5	1	97.4390612409347	MAGIC	NA
M419	30	3.25	3.52815752767196	3.25	0.671475322925101	0.23185545545517	0.186242873324228	0.815892039360247	4.25	1.20624766335729	1	1	24.9809087509234	MAGIC	NA
M42	29	2	2.0743433652116	2	0.0809786111974986	0.130121151672538	0.064780295567372	0.271488243196183	2.5	1.20156231833508	0	1	98.9330006049607	MAGIC	NA
M420	32	2.33333333333333	2.45733614450721	2.33333333333333	0.230089065196643	0.196044535396297	0.183922916746833	0.479530501034328	2.33333333333333	0.95811368291207	1	1	99.7777777777778	MAGIC	NA
M421	32	2	2.11523759858044	2	0.100945312461292	0.145037998223114	0.0908026256066707	0.308757161095254	2.2	1.04158258692253	0	1	99.702499447025	MAGIC	NA
M423	29	3.75	3.81367815191345	3	1.90215015462693	0.348316547998126	0.271738102307496	1.33715135891752	6.75	1.77204383001086	1.75	1	35.8751763737096	MAGIC	NA
M424	30	4	4.08907531922768	4	1.23589367595783	0.271879782689656	0.207518192194948	1.11028995933474	6	1.44956779477098	1	1	24.3488384057141	MAGIC	NA
M425	29	3.5	3.63701923076923	3	0.632532051282051	0.214786976065482	0.175288986969315	0.78540559187502	3.5	0.957923497267759	1	1	10.3476946334089	MAGIC	NA
M426	30	3	2.99597924083816	3	0.302125996041068	0.185062954417979	0.144714120960144	0.547819086010212	3	1.00714451788621	0.333333333333333	1	39.5537866147571	MAGIC	NA
M427	32	3.33333333333333	3.28338945005612	3.33333333333333	0.291060539664042	0.164999819262185	0.13328504725363	0.539039365366757	3.33333333333333	1.02023012227437	0.666666666666667	1	80.4338155483194	MAGIC	NA
M428	31	3.2	3.16647583877065	3.2	0.327250752959463	0.182985604828309	0.13261851908003	0.569095567594195	4.8	1.52330901008257	0.6	1	99.4453364096221	MAGIC	NA
M429	32	2.33333333333333	2.51979021628144	2.33333333333333	0.231001289343264	0.191722187861295	0.166590336164859	0.476836083392788	3	1.19134479423322	0.666666666666667	1	93.0856553147575	MAGIC	NA
M43	25	3	3.08051030890014	3	0.744722592625329	0.279259985025969	0.181369389973879	0.85672621834213	5.75	1.87004594382652	0.5	1	98.231981981982	MAGIC	NA
M430	29	2.2	2.2810036332357	2.2	0.203392260501608	0.186449661088927	0.151792507977068	0.431105829819664	2.6	1.13398411913123	0.6	1	95.5475605475606	MAGIC	NA
M436	30	3	2.90458549459091	3	0.358401493603242	0.202936621064923	0.137201261590775	0.585594008220386	3.75	1.28739141851561	0.5	1	83.3646513829441	MAGIC	NA
M437	31	2	2.14163575462177	2	0.111838140487868	0.148205836283943	0.100722746933913	0.321007337051211	2	0.936000957303759	0.25	1	100	MAGIC	NA
M44	32	2	2.19741500476963	2	0.175781872022263	0.182150055130653	0.133794523271359	0.404101916368055	2.52777777777778	1.149727885757	0.111111111111111	3	99.3521111585647	MAGIC	NA
M441	24	3.33333333333333	3.72531560971107	3.33333333333333	0.43937750203648	0.175093655642284	0.144225211089266	0.652678067202603	3.66666666666667	0.977987468744508	0.666666666666667	1	97.3528342634764	MAGIC	NA
M442	33	3	2.89615384615385	3	0.392920847268673	0.209380685216256	0.170825948245303	0.612708157806096	3	1.01658986175115	1	1	28.3045977011494	MAGIC	NA
M443	31	3	2.98214285714286	2.5	0.454578754578755	0.227919235135618	0.194544052438789	0.663392401083547	3	1.01417004048583	1	1	19.4453198865427	MAGIC	NA
M447	29	4.25	4.23314954382264	4.25	1.36347214775873	0.25626903936069	0.180809342530513	1.09466511792866	6.5	1.5166486271431	1.125	1	50.5687313940413	MAGIC	NA
M448	26	5	5.625	4	3.20967741935484	0.318499068617907	0.258333333333333	1.79155726097572	8	1.42222222222222	3	1	22.0689655172414	MAGIC	NA
M449	26	3.5	3.76129349046016	3.33333333333333	0.82099900298825	0.236560268909332	0.185216642274071	0.894226804187547	4	1.05630635989436	1	1	17.4177735610373	MAGIC	NA
M45	29.5	3.5	3.45880568540128	3.5	0.416199982111943	0.183614714848042	0.134865109581503	0.631054744304619	3.97916666666667	1.17171552099596	0.416666666666667	4	73.8731025892436	MAGIC	NA
M450	26	4	4.14865383075646	4	1.4588592549378	0.267036953126046	0.197954989952382	1.1403056420856	6	1.45079193140601	1	1	80.9762577174644	MAGIC	NA
M451	26	4	4.42008196721311	4.25	1.65628415300546	0.288213398028015	0.228280410524866	1.27790652420641	7	1.56859243697479	1.125	1	26.046312564761	MAGIC	NA
M453	29	3.66666666666667	4.09122744539411	3.66666666666667	0.991781635915096	0.242177645925519	0.186313740549757	0.985039604769121	5	1.23232537335172	1.08333333333333	1	29.2779942651276	MAGIC	NA
M454	31	3	3.39160937309458	3	0.506403790048198	0.204951495963442	0.156245318728186	0.698385942079331	4.8	1.41855037794314	0.6	1	99.4947626715743	MAGIC	NA
M456	30	4	4.26123247590156	4	0.904406527280486	0.223189475805104	0.176982993097944	0.950529694833483	4.66666666666667	1.09252977881363	1.33333333333333	1	61.2386653532368	MAGIC	NA
M457	33	3	2.80245454207048	3	0.207814355168256	0.162650770109753	0.12422369979265	0.454349987331391	3.33333333333333	1.19532900025098	0.333333333333333	1	99.7942386831276	MAGIC	NA
M458	30	3.4	3.50158639217568	3.4	0.320393641686049	0.161589516888635	0.149127696111127	0.565500193276216	3.2	0.91678036237976	1	1	87.0808440944017	MAGIC	NA
M460	29	3.2	3.35141162926248	3.2	0.244503556390985	0.142829704569146	0.122324169669072	0.483050677039739	3.6	1.07254312106247	0.8	1	99.7315436241611	MAGIC	NA
M461	30	3.4	3.65706346077889	3.4	0.399371976850979	0.171707381872539	0.148727727204251	0.627160041298028	4	1.10211670921081	1	1	70.1143520922741	MAGIC	NA
M462	29	4.33333333333333	4.25554550025138	4.33333333333333	0.550710498651675	0.175390634529888	0.148707299821851	0.741745425615212	3.66666666666667	0.858133396554449	1	1	44.3345227386076	MAGIC	NA
M464	31	3	2.77174506974507	3	0.33550722501572	0.209027198113237	0.163655828361315	0.578184888381415	3.66666666666667	1.32917867929989	0.666666666666667	1	92.3453815806313	MAGIC	NA
M466	33	2.75	2.64408263069943	2.75	0.24539233117226	0.188154130521747	0.163775544592672	0.494914024475188	2.5	0.938145397777294	0.75	1	99.5168133249529	MAGIC	NA
M467	33	3	2.95273669529894	3	0.117452437764345	0.111944374434816	0.053194609070377	0.330262059748812	3.2	1.07848366600284	0	1	99.3670542635659	MAGIC	NA
M468	29	3	3.39391025641026	3	0.647452766531714	0.235189185335875	0.188214336229325	0.8001926111995	4.5	1.32236585501755	1	1	27.1541950113379	MAGIC	NA
M469	29	2.8	2.88396829042676	2.8	1.71515917103135	0.296682269301511	0.165394126231559	0.931738066255793	6.4	2.04172759870925	0.2	1	97.718672043653	MAGIC	NA
M473	28	3.66666666666667	4.12701352500027	3.25	2.2601960633075	0.339311424975771	0.253945526754152	1.42745141536282	7.5	1.80947477110424	1.75	1	40.530619806192	MAGIC	NA
M474	31	3	2.91756606189339	3	0.134600106531962	0.124984153594767	0.068612433247468	0.364560716352274	3.33333333333333	1.14259221502188	0	1	99.780701754386	MAGIC	NA
M475	32	3.2	3.33182329627784	3	1.07896585419976	0.308267328219037	0.244567557532736	1.01830993262307	5.4	1.63419328945969	1.2	1	81.6636082423068	MAGIC	NA
M476	29	3.33333333333333	3.22129424096683	3.33333333333333	0.177391477036865	0.126875080040271	0.088252637814236	0.411977026136314	3.33333333333333	1.04182621151371	0.333333333333333	1	99.8697916666667	MAGIC	NA
M478	29	3	3.65054347826087	3	1.42209764872808	0.302537101122524	0.201856854437399	1.12138053619674	6	1.62099411379987	1	1	19.890932250617	MAGIC	NA
M479	36	2.66666666666667	2.59082620709801	2.66666666666667	0.230489951938122	0.186176041944109	0.170305404369	0.480044718841145	2.66666666666667	1.01601974931929	0.666666666666667	1	99.5495495495496	MAGIC	NA
M480	30	3	3.04351570081907	3	0.463504652302072	0.214534594248469	0.127529541831846	0.655202191816285	4.33333333333333	1.42130401357817	0.666666666666667	1	99.3981481481482	MAGIC	NA
M481	30	3	3.32667238199153	3	0.329219410364427	0.172971712138135	0.133113165287829	0.57365061084844	3.66666666666667	1.1258607494827	0.666666666666667	1	65.6965753980679	MAGIC	NA
M482	32	2.8	2.88645156781947	2.8	0.329241645167748	0.195701070218096	0.13212686259655	0.56539756407751	4.4	1.52310344660743	0.35	1	93.1753751139285	MAGIC	NA
M483	29	3.5	3.81065438047735	3.16666666666667	5.12312377092247	0.441183943328711	0.216519820450545	1.73779896627625	14.6666666666667	3.76172601699345	1.16666666666667	1	84.3427101702191	MAGIC	NA
M485	31	3	3.12274031563845	3	0.126074775866305	0.113399827341851	0.0694267299726836	0.354124733016515	3	0.96061381826742	0	1	100	MAGIC	NA
M487	32	4	4.07515805757331	4	2.08453971208699	0.354910894072148	0.240820417245448	1.42149632659594	9.33333333333333	2.33448140304557	1	1	54.3202882129057	MAGIC	NA
M49	28	3.75	3.61753960808839	3.75	0.780177486310915	0.244937205272919	0.194569890101746	0.871259077591149	4.25	1.17671243554839	0.8125	1	37.5783686380218	MAGIC	NA
M490	33	3.33333333333333	3.27046600458365	3.33333333333333	0.605154438321859	0.230392947661687	0.150649599934413	0.760604355553727	4.33333333333333	1.32921839015376	0.333333333333333	1	69.6128974636916	MAGIC	NA
M491	35	2	2.42284433322907	2	0.338839179370563	0.23384350877887	0.206393247130522	0.570967720373093	3	1.2198275862069	1	1	97.5496031746032	MAGIC	NA
M492	32	4.5	4.91152877034647	4	3.81079704848058	0.39560434188081	0.297934329010542	1.91749024629194	10.75	2.26366882973795	2.3125	1	70.8564841135979	MAGIC	NA
M493	32	3	3.27824210782494	3	0.664809102998615	0.248692037580181	0.189401295577574	0.812476922483524	5	1.52410038742578	0.666666666666667	1	97.3733082032596	MAGIC	NA
M494	35	3	2.77388309753005	3	0.182229677235926	0.149132543226088	0.122379966901704	0.406899843567206	2.33333333333333	0.849360641641583	0.333333333333333	1	97.2409447092991	MAGIC	NA
M495	34	2	2.09330849668471	2	0.114447082795078	0.154341905689863	0.0783448750781533	0.324772240916446	3.33333333333333	1.5910621835353	0	1	99.4034267253541	MAGIC	NA
M496	32	3	3.18576609936904	3	0.781627502821216	0.274759360799707	0.217300461769151	0.873733117247844	4.25	1.33763164129435	1.25	1	42.4027890918135	MAGIC	NA
M498	33	2	2.07776717557252	2	0.0916631078844819	0.139803079128225	0.0669808033029738	0.292135343821683	3	1.44460415745245	0	1	97.4981103552532	MAGIC	NA
M499	30	2	2.26675755248336	2	0.163608857154463	0.154003192415156	0.133136258309633	0.361853146837911	2.33333333333333	1.03330785081935	0.666666666666667	1	95.6920072857392	MAGIC	NA
M501	33	2.33333333333333	2.32857355347315	2.33333333333333	0.209727749081772	0.185495014427208	0.155479368822701	0.439789232657637	2.66666666666667	1.12447284408498	0.666666666666667	1	99.5946978096435	MAGIC	NA
M502	28	3	3.3873593287416	3	0.646981997274418	0.235738953800804	0.180284949864365	0.800358828126538	5.33333333333333	1.5715938372978	0.916666666666667	1	64.1261972420116	MAGIC	NA
M503	30	2.66666666666667	2.67542704781887	2.66666666666667	0.354024274324972	0.221371414935088	0.179958160518826	0.586571565107789	4	1.51324286015435	0.75	1	97.7104134087173	MAGIC	NA
M504	33	3	2.89074727709901	3	0.14350810824492	0.130863278019684	0.0794834641784434	0.376996123121618	3.33333333333333	1.15067749271396	0	1	99.6275605214153	MAGIC	NA
M505	30	2.16666666666667	2.51473874757998	2	0.400200966788034	0.251270900575112	0.220688933218706	0.631742238764111	4	1.59085781616795	1	1	57.3379753020611	MAGIC	NA
M506	33	2.5	2.69367561515477	2.5	0.874237310955145	0.267039196882136	0.182640252723061	0.780300320951034	7.25	2.30530754229433	0.75	1	99.2172947709586	MAGIC	NA
M507	30	4.66666666666667	4.56485958485958	4.33333333333333	1.5362359728494	0.273899884386156	0.218643504024503	1.22429301312482	6.33333333333333	1.40413466738415	1.66666666666667	1	98.7122582059291	MAGIC	NA
M508	30	4	4.30968830804896	3.66666666666667	1.69601373429821	0.300763873210293	0.223838727537673	1.27574490851207	8	1.96084584523924	1.33333333333333	1	61.324693358019	MAGIC	NA
M509	31	2.33333333333333	2.59463260470491	2.33333333333333	0.324706152879262	0.220152878735288	0.16763975947264	0.553523518977851	3.66666666666667	1.42098373767377	0.666666666666667	1	96.2572630735324	MAGIC	NA
M51	25	4	4.33067531817532	4	1.99290588367691	0.312843681582454	0.228052351474886	1.37083110395585	9.25	2.10969788293446	1	1	77.3981694925287	MAGIC	NA
M510	31	2.66666666666667	2.49770721283455	2.66666666666667	0.342969309574423	0.204056349892346	0.152812670465744	0.533934516836473	3.33333333333333	1.30491864295674	0.666666666666667	1	92.7752460753337	MAGIC	NA
M511	33	2.25	2.35104223126611	2.25	0.311278062452511	0.221182544819075	0.16557274190598	0.529682644933158	3.75	1.57238461551402	0.5	1	98.9896126281412	MAGIC	NA
M513	30	3.8	3.99560729847495	3.6	1.09068563159304	0.253623882876791	0.182547784742196	1.0208257460424	7	1.74952064908461	1	1	69.0851658261169	MAGIC	NA
M514	35	2	2.29891344286787	2	0.230115681149217	0.208569431774281	0.184684445137298	0.479540691776892	3	1.30501100322333	1	1	99.2311230341326	MAGIC	NA
M515	31	3	2.86365071298777	3	0.323939191825305	0.195670353325203	0.155511664811821	0.560419297584364	3.75	1.30117074943343	0.75	1	98.4631261156488	MAGIC	NA
M516	30	2	2.21745676196637	2	0.223625878236069	0.205625474215931	0.146945445482821	0.458360847733845	3.5	1.57233612728806	0.25	1	95.9373319979883	MAGIC	NA
M517	29	3.25	3.53604600749312	2.75	1.23802865259567	0.319048568722177	0.256534176858824	1.10671053211378	5.75	1.66369292012223	1.75	1	73.2241878570643	MAGIC	NA
M518	33	2	2.50413865985925	2	0.814126308344162	0.341021287238317	0.241981573846937	0.86179724879126	7	2.73841107567915	0.666666666666667	1	90.9333564858102	MAGIC	NA
M519	31	3.33333333333333	3.28449773302714	3	0.779924516655571	0.268048742602025	0.215489621582059	0.876703582522957	5	1.55520488109774	1.33333333333333	1	98.6712565431526	MAGIC	NA
M52	25	3	2.76417421391427	3	0.196124308546813	0.159648686728752	0.130868984961616	0.438271279012552	2.75	0.993083114225911	0.5	1	99.5192307692308	MAGIC	NA
M520	32	3	3.13226179385962	3	0.232058406574518	0.13534352090829	0.0867983361398919	0.434152697094119	3.75	1.18583840247119	0.25	1	99.1102142611431	MAGIC	NA
M521	32	2.25	2.4973955247779	2.25	0.240512743678053	0.197648249414328	0.174665910160053	0.488819915640503	2.75	1.10179900876248	0.75	1	97.9359405663022	MAGIC	NA
M523	31	3	3.20063635800453	3	0.188863410743945	0.131145117673004	0.0884497721675078	0.423552261712541	3.75	1.18193261761323	0.25	1	99.486301369863	MAGIC	NA
M524	33	3	3.22445261614632	3	1.05217562244321	0.312379666531755	0.229422378688367	1.00805037014637	5	1.55101828355033	1	1	43.6246339362618	MAGIC	NA
M525	32	3	2.80811403508772	3	0.32245051515853	0.196901840098715	0.147597941073338	0.553997670292357	4	1.42136003337505	0.5	1	97.8260869565217	MAGIC	NA
M526	34	3	2.8669355500821	3	0.425685755933636	0.2165822304447	0.140027281370977	0.624658249535442	4.75	1.6346994880536	0.25	1	93.1033182503771	MAGIC	NA
M527	33	2.33333333333333	2.6146405848935	2.33333333333333	0.434582875763131	0.245721776791369	0.194620703063804	0.634918747819458	4	1.54617970265029	0.666666666666667	1	49.4304063880523	MAGIC	NA
M53	34.5	4.64583333333333	5.09019338216427	4.08333333333333	6.12260994780336	0.406107065766457	0.279116540876273	2.16230873927375	10.875	2.15353658746144	2.20833333333333	2	80.0683247604658	MAGIC	NA
M54	25	3	2.72808643182663	2.75	0.358320514334867	0.219990698108713	0.179348667729545	0.595916834051396	3.25	1.19663533373842	0.75	1	67.3863524817175	MAGIC	NA
M55	25	3.33333333333333	3.30877192982456	3	0.735021976962088	0.258103796527749	0.188561007796005	0.852775405846301	5.66666666666667	1.71341401760727	0.666666666666667	1	88.7642660369933	MAGIC	NA
M57	27	2.33333333333333	2.56319036881064	2.33333333333333	0.22854142366308	0.18968935201677	0.148654898479842	0.471280848694468	3	1.1856767555142	0.666666666666667	1	98.7301587301587	MAGIC	NA
M59	27	3	2.88307279933737	3	0.336786994851182	0.199665866520916	0.128324559093431	0.575752040839568	4	1.38454793176866	0	1	99.2855859094177	MAGIC	NA
M6	25	3	3.19509408602151	2.66666666666667	1.09197478484813	0.309230389268238	0.251839104064515	1.00443397271641	4.66666666666667	1.41823616344088	1.33333333333333	1	86.7355615385313	MAGIC	NA
M60	29	2.5	2.61261537106048	2.25	0.485211196825228	0.264334315290636	0.223720745956842	0.691803035347363	3.75	1.43313287712265	1	1	91.1140414016622	MAGIC	NA
M63	28	3	3.06929617117117	3	0.32185192542476	0.184429565809026	0.101975354527309	0.566453201867312	4.33333333333333	1.40843359832308	0	1	75.1666036774164	MAGIC	NA
M64	34.6	2.95	2.98982457699091	2.9	0.324693268340385	0.184596011590512	0.131454237835364	0.545565264758273	4.5	1.51952613010103	0.516666666666667	5	97.5817209877958	MAGIC	NA
M66	28	3	3.0256898704206	3	0.20696267852996	0.138569026669407	0.0488294883527196	0.421744523775246	5	1.64473884769701	0	1	99.0666796882266	MAGIC	NA
M67	28	3	2.92990521653569	3	0.237841056172786	0.16682281921253	0.114780876515918	0.485967787874847	3.75	1.28173839437855	0.25	1	92.0642233985789	MAGIC	NA
M68	31	3.66666666666667	3.73584704338093	3.66666666666667	0.505351712551421	0.18580360219054	0.138640093346365	0.699449950934215	4.66666666666667	1.25067727572335	0.666666666666667	1	92.6130072494549	MAGIC	NA
M70	31	2.4	2.51005804249714	2.4	0.544982252111152	0.281675059604504	0.195494766819901	0.703101032098222	5.6	2.24838423576378	0.8	1	93.9308978726845	MAGIC	NA
M71	29	3	2.98447625963966	3	0.603867132698159	0.238540622378196	0.123903074800567	0.719670335001929	6.66666666666667	2.19792816094088	0	1	96.1315878583431	MAGIC	NA
M72	34.4	3.68333333333333	4.0354857570896	3.4	2.54164983397857	0.382048815202997	0.275229366015844	1.52530742595342	8.75	2.31737425019442	1.6	5	72.1294861857675	MAGIC	NA
M73	31	3.66666666666667	3.78672994798755	3.33333333333333	0.705840075420653	0.219107229977605	0.17263827842293	0.833079022969798	5.33333333333333	1.41449428995999	1.33333333333333	1	85.549089169082	MAGIC	NA
M75	29	3	2.7784404837925	3	0.313141797327936	0.199292095631113	0.146011018919079	0.554152402160548	4.25	1.510341492855	0.5	1	98.6449771210277	MAGIC	NA
M79	30	3.16666666666667	3.37258299745832	3	0.474386314199653	0.193013541163915	0.140621224158066	0.660661103108755	5.16666666666667	1.51032969668307	0.625	1	91.7098440513424	MAGIC	NA
M8	27	3	2.75978014421647	3	0.216844545340209	0.168773580201688	0.136102909387073	0.464945352390345	3	1.0814291369093	0.75	1	98.5939984553178	MAGIC	NA
M80	30	2	2.12524965836224	2	0.126516163510255	0.164671193230387	0.098923732869471	0.351114053447978	2.66666666666667	1.26232235506429	0	1	95.7587485889373	MAGIC	NA
M81	28	2.5	2.66000260622849	2.5	0.157398332556827	0.147237159455319	0.105322194694582	0.372405028007868	3.5	1.33191961044224	0.25	1	99.1512659773671	MAGIC	NA
M83	32	3.125	3.25482997582822	3	0.462141435982177	0.207641971209807	0.159075735652581	0.672239970444413	4	1.24367068281073	0.75	1	37.6242602742731	MAGIC	NA
M85	31	3	3.19848948653872	3	0.682494946572899	0.251417830491159	0.167230525323164	0.789114207547743	6.4	2.07672406597032	0.6	1	82.1352700170721	MAGIC	NA
M86	28	3	3.21474358974359	3	0.338205128205128	0.17313154707996	0.117408245349422	0.562592521640897	3.33333333333333	1.03747276688453	0.333333333333333	1	11.461016829115	MAGIC	NA
M88	28	3	3.18909932047416	3	0.39223720629053	0.193389933267189	0.124228212914122	0.615610376198235	4.75	1.49180633981101	0.25	1	98.7828322222165	MAGIC	NA
M89	29	2.66666666666667	2.61005123538307	2.66666666666667	0.204535577019238	0.17529172906534	0.12556065955979	0.451735926186656	3.33333333333333	1.32028183445895	0	1	97.6675381863217	MAGIC	NA
M9	30	3	2.75945458655739	3	0.386025731226891	0.221055350859185	0.168827129128292	0.608716260026937	4	1.44396913603327	0.75	1	99.5412844036697	MAGIC	NA
M90	28	3	3.35029277934292	3	0.381236101251234	0.184313446001241	0.152016049648545	0.61698735393324	4.75	1.42335397989946	0.75	1	97.5864140971503	MAGIC	NA
M91	29	3	3.24037003861211	3	0.662547392288294	0.248753382713142	0.17528991729726	0.80406673655311	6.25	1.94491481607081	0.5	1	88.8872886612163	MAGIC	NA
M92	30	3	2.69080187609198	3	0.446202818286099	0.240367910532463	0.190090547296717	0.651736372545724	5	1.82624941830798	1	1	94.4485294117647	MAGIC	NA
M94	31	4.33333333333333	4.50650222602464	4.5	0.995112899127804	0.221094577260671	0.177177430701477	0.994021677094906	5.83333333333333	1.30152814677281	1.16666666666667	1	65.3683033700331	MAGIC	NA
M95	31	3	3.14223746049101	3	0.479115508100625	0.2122012964757	0.125790712232961	0.670003290077562	5.75	1.82645432207891	0.25	1	96.9557274604626	MAGIC	NA
M96	29	3	3.33665118783229	3	1.16377795404501	0.285011715511113	0.168572390975287	0.976645822103402	8	2.33291536330871	0.333333333333333	1	87.0985007177712	MAGIC	NA
M97	34	4.75	5.00988727858293	4.25	3.10933814172945	0.348107993555946	0.276776650912948	1.74051123499907	8	1.58129692990094	2.75	1	17.2651287206925	MAGIC	NA
M98	27	3	2.68507362784471	3	0.258451136705092	0.189011606074401	0.166895370410414	0.507783400438057	3.33333333333333	1.23372422858724	1	1	97.3178782002311	MAGIC	NA
M99	34.5	2.91666666666667	2.86802656940427	2.66666666666667	0.895307070722787	0.31770962535064	0.239064839533226	0.916729802936699	6.25	2.16375758036622	1	4	81.8729130768098	MAGIC	NA
Bur-0	30	2	2.03366989280302	2	0.0386656091854851	0.0925426563095145	0.0318266577251636	0.188604949954759	2.33333333333333	1.14577930333079	0	NA	98.5116922593777	Parent	1
Can-0	28	2	2.05929535232384	2	0.0554092591033099	0.111244159458202	0.0530295176054575	0.229753193184507	2	0.971396629624478	0	NA	99.7126436781609	Parent	1
Col-0	33	2	2.00260416666667	2	0.00260416666666667	0.0146740706861022	0.00257376783398184	0.0294627825494395	1.33333333333333	0.665369649805447	0	NA	98.4770784770785	Parent	1
Ct-1	28	3	2.73676946176946	3	0.189552631495674	0.159623297613783	0.131466135791	0.432370209078452	2.33333333333333	0.849435461214651	0.333333333333333	NA	45.2500523121992	Parent	1
Edi-1	21	3.66666666666667	3.6739879414298	3.66666666666667	0.523245680701221	0.197084261368426	0.145761113480985	0.720648255090548	3.66666666666667	1.01393281326868	0.666666666666667	NA	38.3191075172207	Parent	1
Hi-0	31	4	4.13292676417209	4	1.08080448755425	0.249750211499964	0.191283103618945	1.0331745472023	5	1.21068656304608	1.25	NA	23.4214906584924	Parent	1
Kn-0	23	3	3.33322181628966	3	0.255963546261622	0.150271941231633	0.129233480570011	0.501733333709017	3	0.898791753425869	0.5	NA	99.7619047619048	Parent	1
Ler-0	28	3.25	3.41847091113186	3.25	0.358496501755249	0.169954094549981	0.145553206901149	0.584244118124343	3.5	1.02617707747947	0.8125	NA	99.5652173913043	Parent	1
Mt-0	29	3	2.72335587288877	2.66666666666667	0.331802381593167	0.209614219052472	0.170737228083398	0.565032989571319	3.66666666666667	1.35986286158871	0.666666666666667	NA	98.8979963570127	Parent	1
No-0	26	2.75	2.83994523784744	2.75	0.696577912985145	0.287166899100514	0.207774476997474	0.821070735271005	5.25	1.82673438229517	0.9375	NA	96.7262024060127	Parent	1
Oy-0	27	3.33333333333333	3.33333333333333	3.66666666666667	0.639898756295611	0.241536970903151	0.203184266549821	0.799472194065649	3.33333333333333	0.996233496651751	1.33333333333333	NA	24.4633088096586	Parent	1
Po-0	28	3	3.0046679316888	2.5	0.872017513540318	0.311554207289362	0.24556576100626	0.933133670795188	4.66666666666667	1.55174190888477	1	NA	68.2199618563255	Parent	1
Rsch-4	29	3	2.97343613558784	3	0.518563283638501	0.241956967300116	0.191728956207698	0.718589125102638	3.75	1.26599289513783	1	NA	55.1438348100077	Parent	1
Sf-2	29	4	4.11178804855275	3	1.88209939831789	0.324571891002227	0.250958556283486	1.34420298734418	7	1.69716003767297	1.66666666666667	NA	49.7299596349433	Parent	1b
Tsu-0	28	3.25	3.47247688649741	3	0.721607961593143	0.243318288486899	0.198667509642661	0.846325045747691	5	1.44166405546621	1	NA	69.2565077509112	Parent	1
Wil-2	28	3.5	3.57441071131101	3.375	0.447909411379979	0.185985713414545	0.16262710311026	0.664677866993357	3.75	1.05366042436356	1	NA	31.7698561485604	Parent	1
Ws-0	29	3.66666666666667	4.16867861202837	3.33333333333333	2.56628632105649	0.36158727702647	0.258084233781022	1.53252643689118	10.6666666666667	2.63130759326925	1.33333333333333	NA	82.8968520592261	Parent	1b
Wu-0	28	4.25	4.375	3.75	1.40027139060753	0.272966800373924	0.20067728921999	1.17669449092368	6	1.41345720720721	1.75	NA	31.4978895326417	Parent	1
Zu-0	32	4	4.44469943265124	4	1.32154970838106	0.257913071726171	0.200932571472028	1.1441079562421	7	1.57773791019626	1	NA	45.4179692955598	Parent	1b
Alb-1	37	4.33333333333333	5.41717171717172	3.83333333333333	9.08137418137418	0.529021044693588	0.365984502065203	2.90639427165218	14.6666666666667	2.69398394328016	2.66666666666667	NA	22.0101045161788	Accession	NA
Aul-0	27	6.33333333333333	7.06289081289081	6.5	12.7141293891294	0.477604153963922	0.335070168885198	3.42651256133598	16	2.22455289724076	3.08333333333333	NA	26.0656011854216	Accession	NA
Bob-0	37	3.66666666666667	3.73592645998558	3.33333333333333	2.09335564246163	0.347766675675891	0.196075474531724	1.31606351961362	11.3333333333333	2.97859588509881	1	NA	67.1037620147743	Accession	NA
Fei-0	26	3.66666666666667	3.64933795311107	3.66666666666667	0.558709045985855	0.19926940765394	0.159257423192367	0.732536862227111	5	1.3536313593848	1	NA	92.5762322472849	Accession	NA
Hor-0	27	5	5	4.5	2.74285714285714	0.297651002137508	0.230756843800322	1.52953913406429	6	1.17552334943639	1.5	NA	18.0970149253731	Accession	NA
Mad-0	27	3.33333333333333	3.60930318073175	3	1.66728814360908	0.339254955593646	0.25678135019601	1.20709091388192	6.33333333333333	1.78241646956474	1.33333333333333	NA	58.6188529666791	Accession	NA
Naa-0	27	4	5.92307692307692	4	10.4102564102564	0.544732566917788	0.3996003996004	3.2264928963592	13	2.19480519480519	3	NA	38.2352941176471	Accession	NA
Ovi-1	26	3	3.13513513513514	3	0.842342342342342	0.292744032508203	0.185927306616962	0.917792101917609	6	1.91379310344828	0	NA	23.4177215189873	Accession	NA
Rio-2	27	4.33333333333333	4.55490196078431	4	1.48577417173766	0.266946977313856	0.210082588277796	1.20877083352605	5.66666666666667	1.25932781522486	2.16666666666667	NA	30.8165722333638	Accession	NA
Svi-0	37	3	2.86324786324786	3	0.268786768786769	0.180811414741124	0.118379002131863	0.512387649784138	3	1.05043859649123	0.333333333333333	NA	12.4474152138087	Accession	NA
