# Supplementary material for: An ABA-GA bistable switch can account for natural variation in the variability of Arabidopsis seed germination time
Source: eLife. 2021 Jun 1;10:e59485. doi: 10.7554/eLife.59485 (PMC8169117; doi:10.7554/eLife.59485)
Supplement: Figure 1—source data 3. [file elife-59485-fig1-data3.tds]

Magic_line	CV_exp1	CV_exp2
M101	1.051337389	0.314917894
M11	0.234410903	0.216126206
M111	0.257055288	0.111813287
M114	0.18200774	0.140663841
M115	0.369607543	0.249985578
M119	0.305963497	0.292641785
M12	0.107406741	0.176486576
M123	0.058990095	0.159396507
M141	0.328393876	0.377666467
M143	1.095337019	1.030417503
M147	0.076064428	0.179077006
M174	1.001623052	0.359883048
M178	0.901398987	1.326744106
M179	0.239455081	0.155164868
M182	1.209213563	0.939179475
M188	0.183797976	0.141916665
M194	0.089703679	0.150982472
M203	0.04925658	0.161526323
M24	0.30923165	0.3300308
M241	0.062620495	0.220796374
M286	0.079955559	0.225697525
M304	1.719663986	1.748254924
M311	1.306163207	1.3077888
M329	0.22073541	0.265030574
M344	0.377409896	0.256818025
M40	0.20183581	0.224405281
M44	0.188167333	0.146699292
M45	0.171394492	0.220946356
M53	0.460734455	0.351479676
M64	0.233127123	0.153640995
M72	0.438465651	0.393327446
M99	0.292788289	0.3235791
