# Supplementary material for: An ABA-GA bistable switch can account for natural variation in the variability of Arabidopsis seed germination time
Source: eLife. 2021 Jun 1;10:e59485. doi: 10.7554/eLife.59485 (PMC8169117; doi:10.7554/eLife.59485)
Supplement: Figure 2—figure supplement 1—source data 1. [file elife-59485-fig2-figsupp1-data1.tds]

Magic_line	Plant	Sowing.day	Sowing.month	Sowing_date	Year	Scoring.date	Mother.plant.sowing.number	DAR	MeanDAR	Total.germinated	Total	NonGer	id	RepNumber	day	number	name	perc	perc_total_ger	group
M182	1B	19	1	19-Jan	2016		1b	32	31	97	107	10	523	1	1	0	M182_19-Jan_1B	0	0	magic
M182	1B	19	1	19-Jan	2016		1b	32	31	97	107	10	523	1	2	4	M182_19-Jan_1B	3.738317757	4.12371134	magic
M182	1B	19	1	19-Jan	2016		1b	32	31	97	107	10	523	1	3	27	M182_19-Jan_1B	25.23364486	27.83505155	magic
M182	1B	19	1	19-Jan	2016		1b	32	31	97	107	10	523	1	4	24	M182_19-Jan_1B	22.42990654	24.74226804	magic
M182	1B	19	1	19-Jan	2016		1b	32	31	97	107	10	523	1	5	7	M182_19-Jan_1B	6.542056075	7.216494845	magic
M182	1B	19	1	19-Jan	2016		1b	32	31	97	107	10	523	1	6	5	M182_19-Jan_1B	4.672897196	5.154639175	magic
M182	1B	19	1	19-Jan	2016		1b	32	31	97	107	10	523	1	7	4	M182_19-Jan_1B	3.738317757	4.12371134	magic
M182	1B	19	1	19-Jan	2016		1b	32	31	97	107	10	523	1	8	4	M182_19-Jan_1B	3.738317757	4.12371134	magic
M182	1B	19	1	19-Jan	2016		1b	32	31	97	107	10	523	1	9	2	M182_19-Jan_1B	1.869158879	2.06185567	magic
M182	1B	19	1	19-Jan	2016		1b	32	31	97	107	10	523	1	10	1	M182_19-Jan_1B	0.934579439	1.030927835	magic
M182	1B	19	1	19-Jan	2016		1b	32	31	97	107	10	523	1	11	0	M182_19-Jan_1B	0	0	magic
M182	1B	19	1	19-Jan	2016		1b	32	31	97	107	10	523	1	12	0	M182_19-Jan_1B	0	0	magic
M182	1B	19	1	19-Jan	2016		1b	32	31	97	107	10	523	1	13	0	M182_19-Jan_1B	0	0	magic
M182	1B	19	1	19-Jan	2016		1b	32	31	97	107	10	523	1	14	0	M182_19-Jan_1B	0	0	magic
M182	1B	19	1	19-Jan	2016		1b	32	31	97	107	10	523	1	15	1	M182_19-Jan_1B	0.934579439	1.030927835	magic
M182	1B	19	1	19-Jan	2016		1b	32	31	97	107	10	523	1	16	0	M182_19-Jan_1B	0	0	magic
M182	1B	19	1	19-Jan	2016		1b	32	31	97	107	10	523	1	17	0	M182_19-Jan_1B	0	0	magic
M182	1B	19	1	19-Jan	2016		1b	32	31	97	107	10	523	1	18	0	M182_19-Jan_1B	0	0	magic
M182	1B	19	1	19-Jan	2016		1b	32	31	97	107	10	523	1	19	0	M182_19-Jan_1B	0	0	magic
M182	1B	19	1	19-Jan	2016		1b	32	31	97	107	10	523	1	20	0	M182_19-Jan_1B	0	0	magic
M182	1B	19	1	19-Jan	2016		1b	32	31	97	107	10	523	1	21	1	M182_19-Jan_1B	0.934579439	1.030927835	magic
M182	1B	19	1	19-Jan	2016		1b	32	31	97	107	10	523	1	22	0	M182_19-Jan_1B	0	0	magic
M182	1B	19	1	19-Jan	2016		1b	32	31	97	107	10	523	1	23	0	M182_19-Jan_1B	0	0	magic
M182	1B	19	1	19-Jan	2016		1b	32	31	97	107	10	523	1	24	0	M182_19-Jan_1B	0	0	magic
M182	1B	19	1	19-Jan	2016		1b	32	31	97	107	10	523	1	25	1	M182_19-Jan_1B	0.934579439	1.030927835	magic
M182	1B	19	1	19-Jan	2016		1b	32	31	97	107	10	523	1	26	3	M182_19-Jan_1B	2.803738318	3.092783505	magic
M182	1B	19	1	19-Jan	2016		1b	32	31	97	107	10	523	1	27	1	M182_19-Jan_1B	0.934579439	1.030927835	magic
M182	1B	19	1	19-Jan	2016		1b	32	31	97	107	10	523	1	28	1	M182_19-Jan_1B	0.934579439	1.030927835	magic
M182	1B	19	1	19-Jan	2016		1b	32	31	97	107	10	523	1	29	3	M182_19-Jan_1B	2.803738318	3.092783505	magic
M182	1B	19	1	19-Jan	2016		1b	32	31	97	107	10	523	1	30	0	M182_19-Jan_1B	0	0	magic
M182	1B	19	1	19-Jan	2016		1b	32	31	97	107	10	523	1	31	2	M182_19-Jan_1B	1.869158879	2.06185567	magic
M182	1B	19	1	19-Jan	2016		1b	32	31	97	107	10	523	1	32	1	M182_19-Jan_1B	0.934579439	1.030927835	magic
M182	1B	19	1	19-Jan	2016		1b	32	31	97	107	10	523	1	33	2	M182_19-Jan_1B	1.869158879	2.06185567	magic
M182	1B	19	1	19-Jan	2016		1b	32	31	97	107	10	523	1	34	0	M182_19-Jan_1B	0	0	magic
M182	1B	19	1	19-Jan	2016		1b	32	31	97	107	10	523	1	35	1	M182_19-Jan_1B	0.934579439	1.030927835	magic
M182	1B	19	1	19-Jan	2016		1b	32	31	97	107	10	523	1	36	1	M182_19-Jan_1B	0.934579439	1.030927835	magic
M182	1B	19	1	19-Jan	2016		1b	32	31	97	107	10	523	1	37	1	M182_19-Jan_1B	0.934579439	1.030927835	magic
M182	2A	7	9	7-Sep	2015		1	28	28	43	107	64	535	2	1	0	M182_07-Sep_2A	0	0	magic
M182	2A	7	9	7-Sep	2015		1	28	28	43	107	64	535	2	2	0	M182_07-Sep_2A	0	0	magic
M182	2A	7	9	7-Sep	2015		1	28	28	43	107	64	535	2	3	3	M182_07-Sep_2A	2.803738318	6.976744186	magic
M182	2A	7	9	7-Sep	2015		1	28	28	43	107	64	535	2	4	0	M182_07-Sep_2A	0	0	magic
M182	2A	7	9	7-Sep	2015		1	28	28	43	107	64	535	2	5	0	M182_07-Sep_2A	0	0	magic
M182	2A	7	9	7-Sep	2015		1	28	28	43	107	64	535	2	6	1	M182_07-Sep_2A	0.934579439	2.325581395	magic
M182	2A	7	9	7-Sep	2015		1	28	28	43	107	64	535	2	7	2	M182_07-Sep_2A	1.869158879	4.651162791	magic
M182	2A	7	9	7-Sep	2015		1	28	28	43	107	64	535	2	8	2	M182_07-Sep_2A	1.869158879	4.651162791	magic
M182	2A	7	9	7-Sep	2015		1	28	28	43	107	64	535	2	9	1	M182_07-Sep_2A	0.934579439	2.325581395	magic
M182	2A	7	9	7-Sep	2015		1	28	28	43	107	64	535	2	10	1	M182_07-Sep_2A	0.934579439	2.325581395	magic
M182	2A	7	9	7-Sep	2015		1	28	28	43	107	64	535	2	11	1	M182_07-Sep_2A	0.934579439	2.325581395	magic
M182	2A	7	9	7-Sep	2015		1	28	28	43	107	64	535	2	12	1	M182_07-Sep_2A	0.934579439	2.325581395	magic
M182	2A	7	9	7-Sep	2015		1	28	28	43	107	64	535	2	13	0	M182_07-Sep_2A	0	0	magic
M182	2A	7	9	7-Sep	2015		1	28	28	43	107	64	535	2	14	1	M182_07-Sep_2A	0.934579439	2.325581395	magic
M182	2A	7	9	7-Sep	2015		1	28	28	43	107	64	535	2	15	0	M182_07-Sep_2A	0	0	magic
M182	2A	7	9	7-Sep	2015		1	28	28	43	107	64	535	2	16	2	M182_07-Sep_2A	1.869158879	4.651162791	magic
M182	2A	7	9	7-Sep	2015		1	28	28	43	107	64	535	2	17	1	M182_07-Sep_2A	0.934579439	2.325581395	magic
M182	2A	7	9	7-Sep	2015		1	28	28	43	107	64	535	2	18	0	M182_07-Sep_2A	0	0	magic
M182	2A	7	9	7-Sep	2015		1	28	28	43	107	64	535	2	19	0	M182_07-Sep_2A	0	0	magic
M182	2A	7	9	7-Sep	2015		1	28	28	43	107	64	535	2	20	0	M182_07-Sep_2A	0	0	magic
M182	2A	7	9	7-Sep	2015		1	28	28	43	107	64	535	2	21	0	M182_07-Sep_2A	0	0	magic
M182	2A	7	9	7-Sep	2015		1	28	28	43	107	64	535	2	22	0	M182_07-Sep_2A	0	0	magic
M182	2A	7	9	7-Sep	2015		1	28	28	43	107	64	535	2	23	0	M182_07-Sep_2A	0	0	magic
M182	2A	7	9	7-Sep	2015		1	28	28	43	107	64	535	2	24	0	M182_07-Sep_2A	0	0	magic
M182	2A	7	9	7-Sep	2015		1	28	28	43	107	64	535	2	25	0	M182_07-Sep_2A	0	0	magic
M182	2A	7	9	7-Sep	2015		1	28	28	43	107	64	535	2	26	0	M182_07-Sep_2A	0	0	magic
M182	2A	7	9	7-Sep	2015		1	28	28	43	107	64	535	2	27	0	M182_07-Sep_2A	0	0	magic
M182	2A	7	9	7-Sep	2015		1	28	28	43	107	64	535	2	28	1	M182_07-Sep_2A	0.934579439	2.325581395	magic
M182	2A	7	9	7-Sep	2015		1	28	28	43	107	64	535	2	29	0	M182_07-Sep_2A	0	0	magic
M182	2A	7	9	7-Sep	2015		1	28	28	43	107	64	535	2	30	0	M182_07-Sep_2A	0	0	magic
M182	2A	7	9	7-Sep	2015		1	28	28	43	107	64	535	2	31	10	M182_07-Sep_2A	9.345794393	23.25581395	magic
M182	2A	7	9	7-Sep	2015		1	28	28	43	107	64	535	2	32	12	M182_07-Sep_2A	11.21495327	27.90697674	magic
M182	2A	7	9	7-Sep	2015		1	28	28	43	107	64	535	2	33	2	M182_07-Sep_2A	1.869158879	4.651162791	magic
M182	2A	7	9	7-Sep	2015		1	28	28	43	107	64	535	2	34	1	M182_07-Sep_2A	0.934579439	2.325581395	magic
M182	2A	7	9	7-Sep	2015		1	28	28	43	107	64	535	2	35	0	M182_07-Sep_2A	0	0	magic
M182	2A	7	9	7-Sep	2015		1	28	28	43	107	64	535	2	36	0	M182_07-Sep_2A	0	0	magic
M182	2A	7	9	7-Sep	2015		1	28	28	43	107	64	535	2	37	0	M182_07-Sep_2A	0	0	magic
M182	2A	7	9	7-Sep	2015		1	28	28	43	107	64	535	2	38	0	M182_07-Sep_2A	0	0	magic
M182	2A	7	9	7-Sep	2015		1	28	28	43	107	64	535	2	39	0	M182_07-Sep_2A	0	0	magic
M182	2A	7	9	7-Sep	2015		1	28	28	43	107	64	535	2	40	0	M182_07-Sep_2A	0	0	magic
M182	2A	7	9	7-Sep	2015		1	28	28	43	107	64	535	2	41	0	M182_07-Sep_2A	0	0	magic
M182	2A	7	9	7-Sep	2015		1	28	28	43	107	64	535	2	42	0	M182_07-Sep_2A	0	0	magic
M182	2A	7	9	7-Sep	2015		1	28	28	43	107	64	535	2	43	0	M182_07-Sep_2A	0	0	magic
M182	2A	7	9	7-Sep	2015		1	28	28	43	107	64	535	2	44	0	M182_07-Sep_2A	0	0	magic
M182	2A	7	9	7-Sep	2015		1	28	28	43	107	64	535	2	45	0	M182_07-Sep_2A	0	0	magic
M182	2A	7	9	7-Sep	2015		1	28	28	43	107	64	535	2	46	0	M182_07-Sep_2A	0	0	magic
M182	2A	7	9	7-Sep	2015		1	28	28	43	107	64	535	2	47	1	M182_07-Sep_2A	0.934579439	2.325581395	magic
M182	2A	7	9	7-Sep	2015		1	28	28	43	107	64	535	2	48	0	M182_07-Sep_2A	0	0	magic
M182	2A	7	9	7-Sep	2015		1	28	28	43	107	64	535	2	49	0	M182_07-Sep_2A	0	0	magic
M182	2A	7	9	7-Sep	2015		1	28	28	43	107	64	535	2	50	0	M182_07-Sep_2A	0	0	magic
M182	2A	7	9	7-Sep	2015		1	28	28	43	107	64	535	2	51	0	M182_07-Sep_2A	0	0	magic
M182	3	19	4	19-Apr	2016		6	33	33	154	171	17	530	2	1	0	M182_19-Apr_3	0	0	magic
M182	3	19	4	19-Apr	2016		6	33	33	154	171	17	530	2	2	4	M182_19-Apr_3	2.339181287	2.597402597	magic
M182	3	19	4	19-Apr	2016		6	33	33	154	171	17	530	2	3	36	M182_19-Apr_3	21.05263158	23.37662338	magic
M182	3	19	4	19-Apr	2016		6	33	33	154	171	17	530	2	4	17	M182_19-Apr_3	9.941520468	11.03896104	magic
M182	3	19	4	19-Apr	2016		6	33	33	154	171	17	530	2	5	15	M182_19-Apr_3	8.771929825	9.74025974	magic
M182	3	19	4	19-Apr	2016		6	33	33	154	171	17	530	2	6	4	M182_19-Apr_3	2.339181287	2.597402597	magic
M182	3	19	4	19-Apr	2016		6	33	33	154	171	17	530	2	7	14	M182_19-Apr_3	8.187134503	9.090909091	magic
M182	3	19	4	19-Apr	2016		6	33	33	154	171	17	530	2	8	10	M182_19-Apr_3	5.847953216	6.493506494	magic
M182	3	19	4	19-Apr	2016		6	33	33	154	171	17	530	2	9	3	M182_19-Apr_3	1.754385965	1.948051948	magic
M182	3	19	4	19-Apr	2016		6	33	33	154	171	17	530	2	10	1	M182_19-Apr_3	0.584795322	0.649350649	magic
M182	3	19	4	19-Apr	2016		6	33	33	154	171	17	530	2	11	1	M182_19-Apr_3	0.584795322	0.649350649	magic
M182	3	19	4	19-Apr	2016		6	33	33	154	171	17	530	2	12	0	M182_19-Apr_3	0	0	magic
M182	3	19	4	19-Apr	2016		6	33	33	154	171	17	530	2	13	0	M182_19-Apr_3	0	0	magic
M182	3	19	4	19-Apr	2016		6	33	33	154	171	17	530	2	14	0	M182_19-Apr_3	0	0	magic
M182	3	19	4	19-Apr	2016		6	33	33	154	171	17	530	2	15	1	M182_19-Apr_3	0.584795322	0.649350649	magic
M182	3	19	4	19-Apr	2016		6	33	33	154	171	17	530	2	16	2	M182_19-Apr_3	1.169590643	1.298701299	magic
M182	3	19	4	19-Apr	2016		6	33	33	154	171	17	530	2	17	0	M182_19-Apr_3	0	0	magic
M182	3	19	4	19-Apr	2016		6	33	33	154	171	17	530	2	18	1	M182_19-Apr_3	0.584795322	0.649350649	magic
M182	3	19	4	19-Apr	2016		6	33	33	154	171	17	530	2	19	0	M182_19-Apr_3	0	0	magic
M182	3	19	4	19-Apr	2016		6	33	33	154	171	17	530	2	20	3	M182_19-Apr_3	1.754385965	1.948051948	magic
M182	3	19	4	19-Apr	2016		6	33	33	154	171	17	530	2	21	8	M182_19-Apr_3	4.678362573	5.194805195	magic
M182	3	19	4	19-Apr	2016		6	33	33	154	171	17	530	2	22	6	M182_19-Apr_3	3.50877193	3.896103896	magic
M182	3	19	4	19-Apr	2016		6	33	33	154	171	17	530	2	23	6	M182_19-Apr_3	3.50877193	3.896103896	magic
M182	3	19	4	19-Apr	2016		6	33	33	154	171	17	530	2	24	1	M182_19-Apr_3	0.584795322	0.649350649	magic
M182	3	19	4	19-Apr	2016		6	33	33	154	171	17	530	2	25	4	M182_19-Apr_3	2.339181287	2.597402597	magic
M182	3	19	4	19-Apr	2016		6	33	33	154	171	17	530	2	26	5	M182_19-Apr_3	2.923976608	3.246753247	magic
M182	3	19	4	19-Apr	2016		6	33	33	154	171	17	530	2	27	2	M182_19-Apr_3	1.169590643	1.298701299	magic
M182	3	19	4	19-Apr	2016		6	33	33	154	171	17	530	2	28	0	M182_19-Apr_3	0	0	magic
M182	3	19	4	19-Apr	2016		6	33	33	154	171	17	530	2	29	0	M182_19-Apr_3	0	0	magic
M182	3	19	4	19-Apr	2016		6	33	33	154	171	17	530	2	30	0	M182_19-Apr_3	0	0	magic
M182	3	19	4	19-Apr	2016		6	33	33	154	171	17	530	2	31	0	M182_19-Apr_3	0	0	magic
M182	3	19	4	19-Apr	2016		6	33	33	154	171	17	530	2	32	0	M182_19-Apr_3	0	0	magic
M182	3	19	4	19-Apr	2016		6	33	33	154	171	17	530	2	33	0	M182_19-Apr_3	0	0	magic
M182	3	19	4	19-Apr	2016		6	33	33	154	171	17	530	2	34	0	M182_19-Apr_3	0	0	magic
M182	3	19	4	19-Apr	2016		6	33	33	154	171	17	530	2	35	0	M182_19-Apr_3	0	0	magic
M182	3	19	4	19-Apr	2016		6	33	33	154	171	17	530	2	36	0	M182_19-Apr_3	0	0	magic
M182	3	19	4	19-Apr	2016		6	33	33	154	171	17	530	2	37	2	M182_19-Apr_3	1.169590643	1.298701299	magic
M182	3	19	4	19-Apr	2016		6	33	33	154	171	17	530	2	38	1	M182_19-Apr_3	0.584795322	0.649350649	magic
M182	3	19	4	19-Apr	2016		6	33	33	154	171	17	530	2	39	1	M182_19-Apr_3	0.584795322	0.649350649	magic
M182	3	19	4	19-Apr	2016		6	33	33	154	171	17	530	2	40	0	M182_19-Apr_3	0	0	magic
M182	3	19	4	19-Apr	2016		6	33	33	154	171	17	530	2	41	0	M182_19-Apr_3	0	0	magic
M182	3	19	4	19-Apr	2016		6	33	33	154	171	17	530	2	42	0	M182_19-Apr_3	0	0	magic
M182	3	19	4	19-Apr	2016		6	33	33	154	171	17	530	2	43	1	M182_19-Apr_3	0.584795322	0.649350649	magic
M182	3	19	4	19-Apr	2016		6	33	33	154	171	17	530	2	44	1	M182_19-Apr_3	0.584795322	0.649350649	magic
M182	3	19	4	19-Apr	2016		6	33	33	154	171	17	530	2	45	3	M182_19-Apr_3	1.754385965	1.948051948	magic
M182	3	19	4	19-Apr	2016		6	33	33	154	171	17	530	2	46	0	M182_19-Apr_3	0	0	magic
M182	3	19	4	19-Apr	2016		6	33	33	154	171	17	530	2	47	0	M182_19-Apr_3	0	0	magic
M182	3	19	4	19-Apr	2016		6	33	33	154	171	17	530	2	48	0	M182_19-Apr_3	0	0	magic
M182	3	19	4	19-Apr	2016		6	33	33	154	171	17	530	2	49	1	M182_19-Apr_3	0.584795322	0.649350649	magic
M182	3A	7	9	7-Sep	2015		1	28	28	31	100	69	536	3	1	0	M182_07-Sep_3A	0	0	magic
M182	3A	7	9	7-Sep	2015		1	28	28	31	100	69	536	3	2	0	M182_07-Sep_3A	0	0	magic
M182	3A	7	9	7-Sep	2015		1	28	28	31	100	69	536	3	3	0	M182_07-Sep_3A	0	0	magic
M182	3A	7	9	7-Sep	2015		1	28	28	31	100	69	536	3	4	4	M182_07-Sep_3A	4	12.90322581	magic
M182	3A	7	9	7-Sep	2015		1	28	28	31	100	69	536	3	5	0	M182_07-Sep_3A	0	0	magic
M182	3A	7	9	7-Sep	2015		1	28	28	31	100	69	536	3	6	1	M182_07-Sep_3A	1	3.225806452	magic
M182	3A	7	9	7-Sep	2015		1	28	28	31	100	69	536	3	7	1	M182_07-Sep_3A	1	3.225806452	magic
M182	3A	7	9	7-Sep	2015		1	28	28	31	100	69	536	3	8	5	M182_07-Sep_3A	5	16.12903226	magic
M182	3A	7	9	7-Sep	2015		1	28	28	31	100	69	536	3	9	4	M182_07-Sep_3A	4	12.90322581	magic
M182	3A	7	9	7-Sep	2015		1	28	28	31	100	69	536	3	10	0	M182_07-Sep_3A	0	0	magic
M182	3A	7	9	7-Sep	2015		1	28	28	31	100	69	536	3	11	0	M182_07-Sep_3A	0	0	magic
M182	3A	7	9	7-Sep	2015		1	28	28	31	100	69	536	3	12	0	M182_07-Sep_3A	0	0	magic
M182	3A	7	9	7-Sep	2015		1	28	28	31	100	69	536	3	13	0	M182_07-Sep_3A	0	0	magic
M182	3A	7	9	7-Sep	2015		1	28	28	31	100	69	536	3	14	0	M182_07-Sep_3A	0	0	magic
M182	3A	7	9	7-Sep	2015		1	28	28	31	100	69	536	3	15	0	M182_07-Sep_3A	0	0	magic
M182	3A	7	9	7-Sep	2015		1	28	28	31	100	69	536	3	16	0	M182_07-Sep_3A	0	0	magic
M182	3A	7	9	7-Sep	2015		1	28	28	31	100	69	536	3	17	0	M182_07-Sep_3A	0	0	magic
M182	3A	7	9	7-Sep	2015		1	28	28	31	100	69	536	3	18	0	M182_07-Sep_3A	0	0	magic
M182	3A	7	9	7-Sep	2015		1	28	28	31	100	69	536	3	19	0	M182_07-Sep_3A	0	0	magic
M182	3A	7	9	7-Sep	2015		1	28	28	31	100	69	536	3	20	0	M182_07-Sep_3A	0	0	magic
M182	3A	7	9	7-Sep	2015		1	28	28	31	100	69	536	3	21	0	M182_07-Sep_3A	0	0	magic
M182	3A	7	9	7-Sep	2015		1	28	28	31	100	69	536	3	22	0	M182_07-Sep_3A	0	0	magic
M182	3A	7	9	7-Sep	2015		1	28	28	31	100	69	536	3	23	0	M182_07-Sep_3A	0	0	magic
M182	3A	7	9	7-Sep	2015		1	28	28	31	100	69	536	3	24	0	M182_07-Sep_3A	0	0	magic
M182	3A	7	9	7-Sep	2015		1	28	28	31	100	69	536	3	25	0	M182_07-Sep_3A	0	0	magic
M182	3A	7	9	7-Sep	2015		1	28	28	31	100	69	536	3	26	0	M182_07-Sep_3A	0	0	magic
M182	3A	7	9	7-Sep	2015		1	28	28	31	100	69	536	3	27	0	M182_07-Sep_3A	0	0	magic
M182	3A	7	9	7-Sep	2015		1	28	28	31	100	69	536	3	28	0	M182_07-Sep_3A	0	0	magic
M182	3A	7	9	7-Sep	2015		1	28	28	31	100	69	536	3	29	0	M182_07-Sep_3A	0	0	magic
M182	3A	7	9	7-Sep	2015		1	28	28	31	100	69	536	3	30	0	M182_07-Sep_3A	0	0	magic
M182	3A	7	9	7-Sep	2015		1	28	28	31	100	69	536	3	31	1	M182_07-Sep_3A	1	3.225806452	magic
M182	3A	7	9	7-Sep	2015		1	28	28	31	100	69	536	3	32	3	M182_07-Sep_3A	3	9.677419355	magic
M182	3A	7	9	7-Sep	2015		1	28	28	31	100	69	536	3	33	2	M182_07-Sep_3A	2	6.451612903	magic
M182	3A	7	9	7-Sep	2015		1	28	28	31	100	69	536	3	34	4	M182_07-Sep_3A	4	12.90322581	magic
M182	3A	7	9	7-Sep	2015		1	28	28	31	100	69	536	3	35	0	M182_07-Sep_3A	0	0	magic
M182	3A	7	9	7-Sep	2015		1	28	28	31	100	69	536	3	36	3	M182_07-Sep_3A	3	9.677419355	magic
M182	3A	7	9	7-Sep	2015		1	28	28	31	100	69	536	3	37	0	M182_07-Sep_3A	0	0	magic
M182	3A	7	9	7-Sep	2015		1	28	28	31	100	69	536	3	38	1	M182_07-Sep_3A	1	3.225806452	magic
M182	3A	7	9	7-Sep	2015		1	28	28	31	100	69	536	3	39	0	M182_07-Sep_3A	0	0	magic
M182	3A	7	9	7-Sep	2015		1	28	28	31	100	69	536	3	40	0	M182_07-Sep_3A	0	0	magic
M182	3A	7	9	7-Sep	2015		1	28	28	31	100	69	536	3	41	0	M182_07-Sep_3A	0	0	magic
M182	3A	7	9	7-Sep	2015		1	28	28	31	100	69	536	3	42	1	M182_07-Sep_3A	1	3.225806452	magic
M182	3A	7	9	7-Sep	2015		1	28	28	31	100	69	536	3	43	0	M182_07-Sep_3A	0	0	magic
M182	3A	7	9	7-Sep	2015		1	28	28	31	100	69	536	3	44	0	M182_07-Sep_3A	0	0	magic
M182	3A	7	9	7-Sep	2015		1	28	28	31	100	69	536	3	45	0	M182_07-Sep_3A	0	0	magic
M182	3A	7	9	7-Sep	2015		1	28	28	31	100	69	536	3	46	0	M182_07-Sep_3A	0	0	magic
M182	3A	7	9	7-Sep	2015		1	28	28	31	100	69	536	3	47	0	M182_07-Sep_3A	0	0	magic
M182	3A	7	9	7-Sep	2015		1	28	28	31	100	69	536	3	48	0	M182_07-Sep_3A	0	0	magic
M182	3A	7	9	7-Sep	2015		1	28	28	31	100	69	536	3	49	0	M182_07-Sep_3A	0	0	magic
M182	3A	7	9	7-Sep	2015		1	28	28	31	100	69	536	3	50	0	M182_07-Sep_3A	0	0	magic
M182	3A	7	9	7-Sep	2015		1	28	28	31	100	69	536	3	51	1	M182_07-Sep_3A	1	3.225806452	magic
M182	3A	19	1	19-Jan	2016		1b	32	31	93	106	13	524	2	1	0	M182_19-Jan_3A	0	0	magic
M182	3A	19	1	19-Jan	2016		1b	32	31	93	106	13	524	2	2	6	M182_19-Jan_3A	5.660377358	6.451612903	magic
M182	3A	19	1	19-Jan	2016		1b	32	31	93	106	13	524	2	3	41	M182_19-Jan_3A	38.67924528	44.08602151	magic
M182	3A	19	1	19-Jan	2016		1b	32	31	93	106	13	524	2	4	15	M182_19-Jan_3A	14.1509434	16.12903226	magic
M182	3A	19	1	19-Jan	2016		1b	32	31	93	106	13	524	2	5	9	M182_19-Jan_3A	8.490566038	9.677419355	magic
M182	3A	19	1	19-Jan	2016		1b	32	31	93	106	13	524	2	6	6	M182_19-Jan_3A	5.660377358	6.451612903	magic
M182	3A	19	1	19-Jan	2016		1b	32	31	93	106	13	524	2	7	0	M182_19-Jan_3A	0	0	magic
M182	3A	19	1	19-Jan	2016		1b	32	31	93	106	13	524	2	8	1	M182_19-Jan_3A	0.943396226	1.075268817	magic
M182	3A	19	1	19-Jan	2016		1b	32	31	93	106	13	524	2	9	0	M182_19-Jan_3A	0	0	magic
M182	3A	19	1	19-Jan	2016		1b	32	31	93	106	13	524	2	10	0	M182_19-Jan_3A	0	0	magic
M182	3A	19	1	19-Jan	2016		1b	32	31	93	106	13	524	2	11	0	M182_19-Jan_3A	0	0	magic
M182	3A	19	1	19-Jan	2016		1b	32	31	93	106	13	524	2	12	0	M182_19-Jan_3A	0	0	magic
M182	3A	19	1	19-Jan	2016		1b	32	31	93	106	13	524	2	13	0	M182_19-Jan_3A	0	0	magic
M182	3A	19	1	19-Jan	2016		1b	32	31	93	106	13	524	2	14	0	M182_19-Jan_3A	0	0	magic
M182	3A	19	1	19-Jan	2016		1b	32	31	93	106	13	524	2	15	0	M182_19-Jan_3A	0	0	magic
M182	3A	19	1	19-Jan	2016		1b	32	31	93	106	13	524	2	16	0	M182_19-Jan_3A	0	0	magic
M182	3A	19	1	19-Jan	2016		1b	32	31	93	106	13	524	2	17	0	M182_19-Jan_3A	0	0	magic
M182	3A	19	1	19-Jan	2016		1b	32	31	93	106	13	524	2	18	0	M182_19-Jan_3A	0	0	magic
M182	3A	19	1	19-Jan	2016		1b	32	31	93	106	13	524	2	19	0	M182_19-Jan_3A	0	0	magic
M182	3A	19	1	19-Jan	2016		1b	32	31	93	106	13	524	2	20	0	M182_19-Jan_3A	0	0	magic
M182	3A	19	1	19-Jan	2016		1b	32	31	93	106	13	524	2	21	0	M182_19-Jan_3A	0	0	magic
M182	3A	19	1	19-Jan	2016		1b	32	31	93	106	13	524	2	22	0	M182_19-Jan_3A	0	0	magic
M182	3A	19	1	19-Jan	2016		1b	32	31	93	106	13	524	2	23	0	M182_19-Jan_3A	0	0	magic
M182	3A	19	1	19-Jan	2016		1b	32	31	93	106	13	524	2	24	1	M182_19-Jan_3A	0.943396226	1.075268817	magic
M182	3A	19	1	19-Jan	2016		1b	32	31	93	106	13	524	2	25	0	M182_19-Jan_3A	0	0	magic
M182	3A	19	1	19-Jan	2016		1b	32	31	93	106	13	524	2	26	3	M182_19-Jan_3A	2.830188679	3.225806452	magic
M182	3A	19	1	19-Jan	2016		1b	32	31	93	106	13	524	2	27	2	M182_19-Jan_3A	1.886792453	2.150537634	magic
M182	3A	19	1	19-Jan	2016		1b	32	31	93	106	13	524	2	28	3	M182_19-Jan_3A	2.830188679	3.225806452	magic
M182	3A	19	1	19-Jan	2016		1b	32	31	93	106	13	524	2	29	0	M182_19-Jan_3A	0	0	magic
M182	3A	19	1	19-Jan	2016		1b	32	31	93	106	13	524	2	30	2	M182_19-Jan_3A	1.886792453	2.150537634	magic
M182	3A	19	1	19-Jan	2016		1b	32	31	93	106	13	524	2	31	1	M182_19-Jan_3A	0.943396226	1.075268817	magic
M182	3A	19	1	19-Jan	2016		1b	32	31	93	106	13	524	2	32	0	M182_19-Jan_3A	0	0	magic
M182	3A	19	1	19-Jan	2016		1b	32	31	93	106	13	524	2	33	0	M182_19-Jan_3A	0	0	magic
M182	3A	19	1	19-Jan	2016		1b	32	31	93	106	13	524	2	34	1	M182_19-Jan_3A	0.943396226	1.075268817	magic
M182	3A	19	1	19-Jan	2016		1b	32	31	93	106	13	524	2	35	0	M182_19-Jan_3A	0	0	magic
M182	3A	19	1	19-Jan	2016		1b	32	31	93	106	13	524	2	36	1	M182_19-Jan_3A	0.943396226	1.075268817	magic
M182	3A	19	1	19-Jan	2016		1b	32	31	93	106	13	524	2	37	1	M182_19-Jan_3A	0.943396226	1.075268817	magic
M182	3B	19	1	19-Jan	2016		1b	29	31	88	101	13	525	3	1	0	M182_19-Jan_3B	0	0	magic
M182	3B	19	1	19-Jan	2016		1b	29	31	88	101	13	525	3	2	3	M182_19-Jan_3B	2.97029703	3.409090909	magic
M182	3B	19	1	19-Jan	2016		1b	29	31	88	101	13	525	3	3	48	M182_19-Jan_3B	47.52475248	54.54545455	magic
M182	3B	19	1	19-Jan	2016		1b	29	31	88	101	13	525	3	4	16	M182_19-Jan_3B	15.84158416	18.18181818	magic
M182	3B	19	1	19-Jan	2016		1b	29	31	88	101	13	525	3	5	9	M182_19-Jan_3B	8.910891089	10.22727273	magic
M182	3B	19	1	19-Jan	2016		1b	29	31	88	101	13	525	3	6	2	M182_19-Jan_3B	1.98019802	2.272727273	magic
M182	3B	19	1	19-Jan	2016		1b	29	31	88	101	13	525	3	7	1	M182_19-Jan_3B	0.99009901	1.136363636	magic
M182	3B	19	1	19-Jan	2016		1b	29	31	88	101	13	525	3	8	1	M182_19-Jan_3B	0.99009901	1.136363636	magic
M182	3B	19	1	19-Jan	2016		1b	29	31	88	101	13	525	3	9	0	M182_19-Jan_3B	0	0	magic
M182	3B	19	1	19-Jan	2016		1b	29	31	88	101	13	525	3	10	0	M182_19-Jan_3B	0	0	magic
M182	3B	19	1	19-Jan	2016		1b	29	31	88	101	13	525	3	11	0	M182_19-Jan_3B	0	0	magic
M182	3B	19	1	19-Jan	2016		1b	29	31	88	101	13	525	3	12	0	M182_19-Jan_3B	0	0	magic
M182	3B	19	1	19-Jan	2016		1b	29	31	88	101	13	525	3	13	0	M182_19-Jan_3B	0	0	magic
M182	3B	19	1	19-Jan	2016		1b	29	31	88	101	13	525	3	14	0	M182_19-Jan_3B	0	0	magic
M182	3B	19	1	19-Jan	2016		1b	29	31	88	101	13	525	3	15	0	M182_19-Jan_3B	0	0	magic
M182	3B	19	1	19-Jan	2016		1b	29	31	88	101	13	525	3	16	0	M182_19-Jan_3B	0	0	magic
M182	3B	19	1	19-Jan	2016		1b	29	31	88	101	13	525	3	17	1	M182_19-Jan_3B	0.99009901	1.136363636	magic
M182	3B	19	1	19-Jan	2016		1b	29	31	88	101	13	525	3	18	0	M182_19-Jan_3B	0	0	magic
M182	3B	19	1	19-Jan	2016		1b	29	31	88	101	13	525	3	19	0	M182_19-Jan_3B	0	0	magic
M182	3B	19	1	19-Jan	2016		1b	29	31	88	101	13	525	3	20	0	M182_19-Jan_3B	0	0	magic
M182	3B	19	1	19-Jan	2016		1b	29	31	88	101	13	525	3	21	0	M182_19-Jan_3B	0	0	magic
M182	3B	19	1	19-Jan	2016		1b	29	31	88	101	13	525	3	22	0	M182_19-Jan_3B	0	0	magic
M182	3B	19	1	19-Jan	2016		1b	29	31	88	101	13	525	3	23	0	M182_19-Jan_3B	0	0	magic
M182	3B	19	1	19-Jan	2016		1b	29	31	88	101	13	525	3	24	0	M182_19-Jan_3B	0	0	magic
M182	3B	19	1	19-Jan	2016		1b	29	31	88	101	13	525	3	25	0	M182_19-Jan_3B	0	0	magic
M182	3B	19	1	19-Jan	2016		1b	29	31	88	101	13	525	3	26	2	M182_19-Jan_3B	1.98019802	2.272727273	magic
M182	3B	19	1	19-Jan	2016		1b	29	31	88	101	13	525	3	27	0	M182_19-Jan_3B	0	0	magic
M182	3B	19	1	19-Jan	2016		1b	29	31	88	101	13	525	3	28	0	M182_19-Jan_3B	0	0	magic
M182	3B	19	1	19-Jan	2016		1b	29	31	88	101	13	525	3	29	0	M182_19-Jan_3B	0	0	magic
M182	3B	19	1	19-Jan	2016		1b	29	31	88	101	13	525	3	30	0	M182_19-Jan_3B	0	0	magic
M182	3B	19	1	19-Jan	2016		1b	29	31	88	101	13	525	3	31	3	M182_19-Jan_3B	2.97029703	3.409090909	magic
M182	3B	19	1	19-Jan	2016		1b	29	31	88	101	13	525	3	32	0	M182_19-Jan_3B	0	0	magic
M182	3B	19	1	19-Jan	2016		1b	29	31	88	101	13	525	3	33	2	M182_19-Jan_3B	1.98019802	2.272727273	magic
M182	3B	19	1	19-Jan	2016		1b	29	31	88	101	13	525	3	34	0	M182_19-Jan_3B	0	0	magic
M182	3B	19	1	19-Jan	2016		1b	29	31	88	101	13	525	3	35	0	M182_19-Jan_3B	0	0	magic
M182	3B	19	1	19-Jan	2016		1b	29	31	88	101	13	525	3	36	0	M182_19-Jan_3B	0	0	magic
M182	3B	19	1	19-Jan	2016		1b	29	31	88	101	13	525	3	37	0	M182_19-Jan_3B	0	0	magic
M182	4	19	4	19-Apr	2016		6	33	33	126	136	10	529	1	1	0	M182_19-Apr_4	0	0	magic
M182	4	19	4	19-Apr	2016		6	33	33	126	136	10	529	1	2	0	M182_19-Apr_4	0	0	magic
M182	4	19	4	19-Apr	2016		6	33	33	126	136	10	529	1	3	23	M182_19-Apr_4	16.91176471	18.25396825	magic
M182	4	19	4	19-Apr	2016		6	33	33	126	136	10	529	1	4	26	M182_19-Apr_4	19.11764706	20.63492063	magic
M182	4	19	4	19-Apr	2016		6	33	33	126	136	10	529	1	5	7	M182_19-Apr_4	5.147058824	5.555555556	magic
M182	4	19	4	19-Apr	2016		6	33	33	126	136	10	529	1	6	2	M182_19-Apr_4	1.470588235	1.587301587	magic
M182	4	19	4	19-Apr	2016		6	33	33	126	136	10	529	1	7	3	M182_19-Apr_4	2.205882353	2.380952381	magic
M182	4	19	4	19-Apr	2016		6	33	33	126	136	10	529	1	8	1	M182_19-Apr_4	0.735294118	0.793650794	magic
M182	4	19	4	19-Apr	2016		6	33	33	126	136	10	529	1	9	0	M182_19-Apr_4	0	0	magic
M182	4	19	4	19-Apr	2016		6	33	33	126	136	10	529	1	10	4	M182_19-Apr_4	2.941176471	3.174603175	magic
M182	4	19	4	19-Apr	2016		6	33	33	126	136	10	529	1	11	1	M182_19-Apr_4	0.735294118	0.793650794	magic
M182	4	19	4	19-Apr	2016		6	33	33	126	136	10	529	1	12	0	M182_19-Apr_4	0	0	magic
M182	4	19	4	19-Apr	2016		6	33	33	126	136	10	529	1	13	0	M182_19-Apr_4	0	0	magic
M182	4	19	4	19-Apr	2016		6	33	33	126	136	10	529	1	14	1	M182_19-Apr_4	0.735294118	0.793650794	magic
M182	4	19	4	19-Apr	2016		6	33	33	126	136	10	529	1	15	3	M182_19-Apr_4	2.205882353	2.380952381	magic
M182	4	19	4	19-Apr	2016		6	33	33	126	136	10	529	1	16	1	M182_19-Apr_4	0.735294118	0.793650794	magic
M182	4	19	4	19-Apr	2016		6	33	33	126	136	10	529	1	17	1	M182_19-Apr_4	0.735294118	0.793650794	magic
M182	4	19	4	19-Apr	2016		6	33	33	126	136	10	529	1	18	0	M182_19-Apr_4	0	0	magic
M182	4	19	4	19-Apr	2016		6	33	33	126	136	10	529	1	19	2	M182_19-Apr_4	1.470588235	1.587301587	magic
M182	4	19	4	19-Apr	2016		6	33	33	126	136	10	529	1	20	0	M182_19-Apr_4	0	0	magic
M182	4	19	4	19-Apr	2016		6	33	33	126	136	10	529	1	21	2	M182_19-Apr_4	1.470588235	1.587301587	magic
M182	4	19	4	19-Apr	2016		6	33	33	126	136	10	529	1	22	7	M182_19-Apr_4	5.147058824	5.555555556	magic
M182	4	19	4	19-Apr	2016		6	33	33	126	136	10	529	1	23	4	M182_19-Apr_4	2.941176471	3.174603175	magic
M182	4	19	4	19-Apr	2016		6	33	33	126	136	10	529	1	24	7	M182_19-Apr_4	5.147058824	5.555555556	magic
M182	4	19	4	19-Apr	2016		6	33	33	126	136	10	529	1	25	4	M182_19-Apr_4	2.941176471	3.174603175	magic
M182	4	19	4	19-Apr	2016		6	33	33	126	136	10	529	1	26	0	M182_19-Apr_4	0	0	magic
M182	4	19	4	19-Apr	2016		6	33	33	126	136	10	529	1	27	0	M182_19-Apr_4	0	0	magic
M182	4	19	4	19-Apr	2016		6	33	33	126	136	10	529	1	28	0	M182_19-Apr_4	0	0	magic
M182	4	19	4	19-Apr	2016		6	33	33	126	136	10	529	1	29	0	M182_19-Apr_4	0	0	magic
M182	4	19	4	19-Apr	2016		6	33	33	126	136	10	529	1	30	0	M182_19-Apr_4	0	0	magic
M182	4	19	4	19-Apr	2016		6	33	33	126	136	10	529	1	31	1	M182_19-Apr_4	0.735294118	0.793650794	magic
M182	4	19	4	19-Apr	2016		6	33	33	126	136	10	529	1	32	0	M182_19-Apr_4	0	0	magic
M182	4	19	4	19-Apr	2016		6	33	33	126	136	10	529	1	33	0	M182_19-Apr_4	0	0	magic
M182	4	19	4	19-Apr	2016		6	33	33	126	136	10	529	1	34	0	M182_19-Apr_4	0	0	magic
M182	4	19	4	19-Apr	2016		6	33	33	126	136	10	529	1	35	3	M182_19-Apr_4	2.205882353	2.380952381	magic
M182	4	19	4	19-Apr	2016		6	33	33	126	136	10	529	1	36	2	M182_19-Apr_4	1.470588235	1.587301587	magic
M182	4	19	4	19-Apr	2016		6	33	33	126	136	10	529	1	37	2	M182_19-Apr_4	1.470588235	1.587301587	magic
M182	4	19	4	19-Apr	2016		6	33	33	126	136	10	529	1	38	0	M182_19-Apr_4	0	0	magic
M182	4	19	4	19-Apr	2016		6	33	33	126	136	10	529	1	39	0	M182_19-Apr_4	0	0	magic
M182	4	19	4	19-Apr	2016		6	33	33	126	136	10	529	1	40	1	M182_19-Apr_4	0.735294118	0.793650794	magic
M182	4	19	4	19-Apr	2016		6	33	33	126	136	10	529	1	41	1	M182_19-Apr_4	0.735294118	0.793650794	magic
M182	4	19	4	19-Apr	2016		6	33	33	126	136	10	529	1	42	0	M182_19-Apr_4	0	0	magic
M182	4	19	4	19-Apr	2016		6	33	33	126	136	10	529	1	43	1	M182_19-Apr_4	0.735294118	0.793650794	magic
M182	4	19	4	19-Apr	2016		6	33	33	126	136	10	529	1	44	0	M182_19-Apr_4	0	0	magic
M182	4	19	4	19-Apr	2016		6	33	33	126	136	10	529	1	45	8	M182_19-Apr_4	5.882352941	6.349206349	magic
M182	4	19	4	19-Apr	2016		6	33	33	126	136	10	529	1	46	4	M182_19-Apr_4	2.941176471	3.174603175	magic
M182	4	19	4	19-Apr	2016		6	33	33	126	136	10	529	1	47	2	M182_19-Apr_4	1.470588235	1.587301587	magic
M182	4	19	4	19-Apr	2016		6	33	33	126	136	10	529	1	48	2	M182_19-Apr_4	1.470588235	1.587301587	magic
M182	4	19	4	19-Apr	2016		6	33	33	126	136	10	529	1	49	0	M182_19-Apr_4	0	0	magic
M182	4A	7	9	7-Sep	2015		1	28	28	37	98	61	534	1	1	0	M182_07-Sep_4A	0	0	magic
M182	4A	7	9	7-Sep	2015		1	28	28	37	98	61	534	1	2	0	M182_07-Sep_4A	0	0	magic
M182	4A	7	9	7-Sep	2015		1	28	28	37	98	61	534	1	3	1	M182_07-Sep_4A	1.020408163	2.702702703	magic
M182	4A	7	9	7-Sep	2015		1	28	28	37	98	61	534	1	4	1	M182_07-Sep_4A	1.020408163	2.702702703	magic
M182	4A	7	9	7-Sep	2015		1	28	28	37	98	61	534	1	5	0	M182_07-Sep_4A	0	0	magic
M182	4A	7	9	7-Sep	2015		1	28	28	37	98	61	534	1	6	0	M182_07-Sep_4A	0	0	magic
M182	4A	7	9	7-Sep	2015		1	28	28	37	98	61	534	1	7	1	M182_07-Sep_4A	1.020408163	2.702702703	magic
M182	4A	7	9	7-Sep	2015		1	28	28	37	98	61	534	1	8	2	M182_07-Sep_4A	2.040816327	5.405405405	magic
M182	4A	7	9	7-Sep	2015		1	28	28	37	98	61	534	1	9	2	M182_07-Sep_4A	2.040816327	5.405405405	magic
M182	4A	7	9	7-Sep	2015		1	28	28	37	98	61	534	1	10	2	M182_07-Sep_4A	2.040816327	5.405405405	magic
M182	4A	7	9	7-Sep	2015		1	28	28	37	98	61	534	1	11	0	M182_07-Sep_4A	0	0	magic
M182	4A	7	9	7-Sep	2015		1	28	28	37	98	61	534	1	12	0	M182_07-Sep_4A	0	0	magic
M182	4A	7	9	7-Sep	2015		1	28	28	37	98	61	534	1	13	1	M182_07-Sep_4A	1.020408163	2.702702703	magic
M182	4A	7	9	7-Sep	2015		1	28	28	37	98	61	534	1	14	0	M182_07-Sep_4A	0	0	magic
M182	4A	7	9	7-Sep	2015		1	28	28	37	98	61	534	1	15	0	M182_07-Sep_4A	0	0	magic
M182	4A	7	9	7-Sep	2015		1	28	28	37	98	61	534	1	16	0	M182_07-Sep_4A	0	0	magic
M182	4A	7	9	7-Sep	2015		1	28	28	37	98	61	534	1	17	0	M182_07-Sep_4A	0	0	magic
M182	4A	7	9	7-Sep	2015		1	28	28	37	98	61	534	1	18	0	M182_07-Sep_4A	0	0	magic
M182	4A	7	9	7-Sep	2015		1	28	28	37	98	61	534	1	19	0	M182_07-Sep_4A	0	0	magic
M182	4A	7	9	7-Sep	2015		1	28	28	37	98	61	534	1	20	0	M182_07-Sep_4A	0	0	magic
M182	4A	7	9	7-Sep	2015		1	28	28	37	98	61	534	1	21	0	M182_07-Sep_4A	0	0	magic
M182	4A	7	9	7-Sep	2015		1	28	28	37	98	61	534	1	22	0	M182_07-Sep_4A	0	0	magic
M182	4A	7	9	7-Sep	2015		1	28	28	37	98	61	534	1	23	0	M182_07-Sep_4A	0	0	magic
M182	4A	7	9	7-Sep	2015		1	28	28	37	98	61	534	1	24	0	M182_07-Sep_4A	0	0	magic
M182	4A	7	9	7-Sep	2015		1	28	28	37	98	61	534	1	25	0	M182_07-Sep_4A	0	0	magic
M182	4A	7	9	7-Sep	2015		1	28	28	37	98	61	534	1	26	0	M182_07-Sep_4A	0	0	magic
M182	4A	7	9	7-Sep	2015		1	28	28	37	98	61	534	1	27	1	M182_07-Sep_4A	1.020408163	2.702702703	magic
M182	4A	7	9	7-Sep	2015		1	28	28	37	98	61	534	1	28	4	M182_07-Sep_4A	4.081632653	10.81081081	magic
M182	4A	7	9	7-Sep	2015		1	28	28	37	98	61	534	1	29	1	M182_07-Sep_4A	1.020408163	2.702702703	magic
M182	4A	7	9	7-Sep	2015		1	28	28	37	98	61	534	1	30	10	M182_07-Sep_4A	10.20408163	27.02702703	magic
M182	4A	7	9	7-Sep	2015		1	28	28	37	98	61	534	1	31	5	M182_07-Sep_4A	5.102040816	13.51351351	magic
M182	4A	7	9	7-Sep	2015		1	28	28	37	98	61	534	1	32	0	M182_07-Sep_4A	0	0	magic
M182	4A	7	9	7-Sep	2015		1	28	28	37	98	61	534	1	33	1	M182_07-Sep_4A	1.020408163	2.702702703	magic
M182	4A	7	9	7-Sep	2015		1	28	28	37	98	61	534	1	34	0	M182_07-Sep_4A	0	0	magic
M182	4A	7	9	7-Sep	2015		1	28	28	37	98	61	534	1	35	0	M182_07-Sep_4A	0	0	magic
M182	4A	7	9	7-Sep	2015		1	28	28	37	98	61	534	1	36	0	M182_07-Sep_4A	0	0	magic
M182	4A	7	9	7-Sep	2015		1	28	28	37	98	61	534	1	37	0	M182_07-Sep_4A	0	0	magic
M182	4A	7	9	7-Sep	2015		1	28	28	37	98	61	534	1	38	0	M182_07-Sep_4A	0	0	magic
M182	4A	7	9	7-Sep	2015		1	28	28	37	98	61	534	1	39	0	M182_07-Sep_4A	0	0	magic
M182	4A	7	9	7-Sep	2015		1	28	28	37	98	61	534	1	40	0	M182_07-Sep_4A	0	0	magic
M182	4A	7	9	7-Sep	2015		1	28	28	37	98	61	534	1	41	0	M182_07-Sep_4A	0	0	magic
M182	4A	7	9	7-Sep	2015		1	28	28	37	98	61	534	1	42	0	M182_07-Sep_4A	0	0	magic
M182	4A	7	9	7-Sep	2015		1	28	28	37	98	61	534	1	43	0	M182_07-Sep_4A	0	0	magic
M182	4A	7	9	7-Sep	2015		1	28	28	37	98	61	534	1	44	1	M182_07-Sep_4A	1.020408163	2.702702703	magic
M182	4A	7	9	7-Sep	2015		1	28	28	37	98	61	534	1	45	0	M182_07-Sep_4A	0	0	magic
M182	4A	7	9	7-Sep	2015		1	28	28	37	98	61	534	1	46	0	M182_07-Sep_4A	0	0	magic
M182	4A	7	9	7-Sep	2015		1	28	28	37	98	61	534	1	47	0	M182_07-Sep_4A	0	0	magic
M182	4A	7	9	7-Sep	2015		1	28	28	37	98	61	534	1	48	1	M182_07-Sep_4A	1.020408163	2.702702703	magic
M182	4A	7	9	7-Sep	2015		1	28	28	37	98	61	534	1	49	1	M182_07-Sep_4A	1.020408163	2.702702703	magic
M182	4A	7	9	7-Sep	2015		1	28	28	37	98	61	534	1	50	0	M182_07-Sep_4A	0	0	magic
M182	4A	7	9	7-Sep	2015		1	28	28	37	98	61	534	1	51	2	M182_07-Sep_4A	2.040816327	5.405405405	magic
M4	1	8	12	8-Dec	2015		2	25	27	119	121	2	1183	2	1	0	M4_08-Dec_1	0	0	magic
M4	1	8	12	8-Dec	2015		2	25	27	119	121	2	1183	2	2	12	M4_08-Dec_1	9.917355372	10.08403361	magic
M4	1	8	12	8-Dec	2015		2	25	27	119	121	2	1183	2	3	59	M4_08-Dec_1	48.76033058	49.57983193	magic
M4	1	8	12	8-Dec	2015		2	25	27	119	121	2	1183	2	4	34	M4_08-Dec_1	28.09917355	28.57142857	magic
M4	1	8	12	8-Dec	2015		2	25	27	119	121	2	1183	2	5	4	M4_08-Dec_1	3.305785124	3.361344538	magic
M4	1	8	12	8-Dec	2015		2	25	27	119	121	2	1183	2	6	7	M4_08-Dec_1	5.785123967	5.882352941	magic
M4	1	8	12	8-Dec	2015		2	25	27	119	121	2	1183	2	7	1	M4_08-Dec_1	0.826446281	0.840336134	magic
M4	1	8	12	8-Dec	2015		2	25	27	119	121	2	1183	2	8	1	M4_08-Dec_1	0.826446281	0.840336134	magic
M4	1	8	12	8-Dec	2015		2	25	27	119	121	2	1183	2	9	0	M4_08-Dec_1	0	0	magic
M4	1	8	12	8-Dec	2015		2	25	27	119	121	2	1183	2	10	1	M4_08-Dec_1	0.826446281	0.840336134	magic
M4	1	8	12	8-Dec	2015		2	25	27	119	121	2	1183	2	11	0	M4_08-Dec_1	0	0	magic
M4	3	8	12	8-Dec	2015		2	29	27	118	120	2	1182	1	1	0	M4_08-Dec_3	0	0	magic
M4	3	8	12	8-Dec	2015		2	29	27	118	120	2	1182	1	2	12	M4_08-Dec_3	10	10.16949153	magic
M4	3	8	12	8-Dec	2015		2	29	27	118	120	2	1182	1	3	28	M4_08-Dec_3	23.33333333	23.72881356	magic
M4	3	8	12	8-Dec	2015		2	29	27	118	120	2	1182	1	4	45	M4_08-Dec_3	37.5	38.13559322	magic
M4	3	8	12	8-Dec	2015		2	29	27	118	120	2	1182	1	5	12	M4_08-Dec_3	10	10.16949153	magic
M4	3	8	12	8-Dec	2015		2	29	27	118	120	2	1182	1	6	13	M4_08-Dec_3	10.83333333	11.01694915	magic
M4	3	8	12	8-Dec	2015		2	29	27	118	120	2	1182	1	7	2	M4_08-Dec_3	1.666666667	1.694915254	magic
M4	3	8	12	8-Dec	2015		2	29	27	118	120	2	1182	1	8	2	M4_08-Dec_3	1.666666667	1.694915254	magic
M4	3	8	12	8-Dec	2015		2	29	27	118	120	2	1182	1	9	1	M4_08-Dec_3	0.833333333	0.847457627	magic
M4	3	8	12	8-Dec	2015		2	29	27	118	120	2	1182	1	10	2	M4_08-Dec_3	1.666666667	1.694915254	magic
M4	3	8	12	8-Dec	2015		2	29	27	118	120	2	1182	1	11	1	M4_08-Dec_3	0.833333333	0.847457627	magic
M4	5	8	12	8-Dec	2015		2	29	27	106	118	12	1185	4	1	0	M4_08-Dec_5	0	0	magic
M4	5	8	12	8-Dec	2015		2	29	27	106	118	12	1185	4	2	2	M4_08-Dec_5	1.694915254	1.886792453	magic
M4	5	8	12	8-Dec	2015		2	29	27	106	118	12	1185	4	3	4	M4_08-Dec_5	3.389830508	3.773584906	magic
M4	5	8	12	8-Dec	2015		2	29	27	106	118	12	1185	4	4	16	M4_08-Dec_5	13.55932203	15.09433962	magic
M4	5	8	12	8-Dec	2015		2	29	27	106	118	12	1185	4	5	20	M4_08-Dec_5	16.94915254	18.86792453	magic
M4	5	8	12	8-Dec	2015		2	29	27	106	118	12	1185	4	6	19	M4_08-Dec_5	16.10169492	17.9245283	magic
M4	5	8	12	8-Dec	2015		2	29	27	106	118	12	1185	4	7	27	M4_08-Dec_5	22.88135593	25.47169811	magic
M4	5	8	12	8-Dec	2015		2	29	27	106	118	12	1185	4	8	8	M4_08-Dec_5	6.779661017	7.547169811	magic
M4	5	8	12	8-Dec	2015		2	29	27	106	118	12	1185	4	9	4	M4_08-Dec_5	3.389830508	3.773584906	magic
M4	5	8	12	8-Dec	2015		2	29	27	106	118	12	1185	4	10	1	M4_08-Dec_5	0.847457627	0.943396226	magic
M4	5	8	12	8-Dec	2015		2	29	27	106	118	12	1185	4	11	5	M4_08-Dec_5	4.237288136	4.716981132	magic
M4	6	8	12	8-Dec	2015		2	25	27	118	123	5	1184	3	1	0	M4_08-Dec_6	0	0	magic
M4	6	8	12	8-Dec	2015		2	25	27	118	123	5	1184	3	2	1	M4_08-Dec_6	0.81300813	0.847457627	magic
M4	6	8	12	8-Dec	2015		2	25	27	118	123	5	1184	3	3	24	M4_08-Dec_6	19.51219512	20.33898305	magic
M4	6	8	12	8-Dec	2015		2	25	27	118	123	5	1184	3	4	35	M4_08-Dec_6	28.45528455	29.66101695	magic
M4	6	8	12	8-Dec	2015		2	25	27	118	123	5	1184	3	5	28	M4_08-Dec_6	22.76422764	23.72881356	magic
M4	6	8	12	8-Dec	2015		2	25	27	118	123	5	1184	3	6	14	M4_08-Dec_6	11.38211382	11.86440678	magic
M4	6	8	12	8-Dec	2015		2	25	27	118	123	5	1184	3	7	11	M4_08-Dec_6	8.943089431	9.322033898	magic
M4	6	8	12	8-Dec	2015		2	25	27	118	123	5	1184	3	8	1	M4_08-Dec_6	0.81300813	0.847457627	magic
M4	6	8	12	8-Dec	2015		2	25	27	118	123	5	1184	3	9	3	M4_08-Dec_6	2.43902439	2.542372881	magic
M4	6	8	12	8-Dec	2015		2	25	27	118	123	5	1184	3	10	0	M4_08-Dec_6	0	0	magic
M4	6	8	12	8-Dec	2015		2	25	27	118	123	5	1184	3	11	1	M4_08-Dec_6	0.81300813	0.847457627	magic
M53	1	2	12	2-Dec	2015		2	27	27	57	83	26	1639	2	1	0	M53_02-Dec_1	0	0	magic
M53	1	2	12	2-Dec	2015		2	27	27	57	83	26	1639	2	2	0	M53_02-Dec_1	0	0	magic
M53	1	2	12	2-Dec	2015		2	27	27	57	83	26	1639	2	3	6	M53_02-Dec_1	7.228915663	10.52631579	magic
M53	1	2	12	2-Dec	2015		2	27	27	57	83	26	1639	2	4	13	M53_02-Dec_1	15.6626506	22.80701754	magic
M53	1	2	12	2-Dec	2015		2	27	27	57	83	26	1639	2	5	12	M53_02-Dec_1	14.45783133	21.05263158	magic
M53	1	2	12	2-Dec	2015		2	27	27	57	83	26	1639	2	6	13	M53_02-Dec_1	15.6626506	22.80701754	magic
M53	1	2	12	2-Dec	2015		2	27	27	57	83	26	1639	2	7	6	M53_02-Dec_1	7.228915663	10.52631579	magic
M53	1	2	12	2-Dec	2015		2	27	27	57	83	26	1639	2	8	1	M53_02-Dec_1	1.204819277	1.754385965	magic
M53	1	2	12	2-Dec	2015		2	27	27	57	83	26	1639	2	9	1	M53_02-Dec_1	1.204819277	1.754385965	magic
M53	1	2	12	2-Dec	2015		2	27	27	57	83	26	1639	2	10	0	M53_02-Dec_1	0	0	magic
M53	1	2	12	2-Dec	2015		2	27	27	57	83	26	1639	2	11	0	M53_02-Dec_1	0	0	magic
M53	1	2	12	2-Dec	2015		2	27	27	57	83	26	1639	2	12	1	M53_02-Dec_1	1.204819277	1.754385965	magic
M53	1	2	12	2-Dec	2015		2	27	27	57	83	26	1639	2	13	0	M53_02-Dec_1	0	0	magic
M53	1	2	12	2-Dec	2015		2	27	27	57	83	26	1639	2	14	0	M53_02-Dec_1	0	0	magic
M53	1	2	12	2-Dec	2015		2	27	27	57	83	26	1639	2	15	2	M53_02-Dec_1	2.409638554	3.50877193	magic
M53	1	2	12	2-Dec	2015		2	27	27	57	83	26	1639	2	16	0	M53_02-Dec_1	0	0	magic
M53	1	2	12	2-Dec	2015		2	27	27	57	83	26	1639	2	17	2	M53_02-Dec_1	2.409638554	3.50877193	magic
M53	1	2	12	2-Dec	2015		2	27	27	57	83	26	1639	2	18	0	M53_02-Dec_1	0	0	magic
M53	1	2	12	2-Dec	2015		2	27	27	57	83	26	1639	2	19	0	M53_02-Dec_1	0	0	magic
M53	1	2	12	2-Dec	2015		2	27	27	57	83	26	1639	2	20	0	M53_02-Dec_1	0	0	magic
M53	4	2	12	2-Dec	2015		2	27	27	75	82	7	1638	1	1	0	M53_02-Dec_4	0	0	magic
M53	4	2	12	2-Dec	2015		2	27	27	75	82	7	1638	1	2	1	M53_02-Dec_4	1.219512195	1.333333333	magic
M53	4	2	12	2-Dec	2015		2	27	27	75	82	7	1638	1	3	6	M53_02-Dec_4	7.317073171	8	magic
M53	4	2	12	2-Dec	2015		2	27	27	75	82	7	1638	1	4	11	M53_02-Dec_4	13.41463415	14.66666667	magic
M53	4	2	12	2-Dec	2015		2	27	27	75	82	7	1638	1	5	10	M53_02-Dec_4	12.19512195	13.33333333	magic
M53	4	2	12	2-Dec	2015		2	27	27	75	82	7	1638	1	6	13	M53_02-Dec_4	15.85365854	17.33333333	magic
M53	4	2	12	2-Dec	2015		2	27	27	75	82	7	1638	1	7	8	M53_02-Dec_4	9.756097561	10.66666667	magic
M53	4	2	12	2-Dec	2015		2	27	27	75	82	7	1638	1	8	10	M53_02-Dec_4	12.19512195	13.33333333	magic
M53	4	2	12	2-Dec	2015		2	27	27	75	82	7	1638	1	9	5	M53_02-Dec_4	6.097560976	6.666666667	magic
M53	4	2	12	2-Dec	2015		2	27	27	75	82	7	1638	1	10	4	M53_02-Dec_4	4.87804878	5.333333333	magic
M53	4	2	12	2-Dec	2015		2	27	27	75	82	7	1638	1	11	1	M53_02-Dec_4	1.219512195	1.333333333	magic
M53	4	2	12	2-Dec	2015		2	27	27	75	82	7	1638	1	12	1	M53_02-Dec_4	1.219512195	1.333333333	magic
M53	4	2	12	2-Dec	2015		2	27	27	75	82	7	1638	1	13	0	M53_02-Dec_4	0	0	magic
M53	4	2	12	2-Dec	2015		2	27	27	75	82	7	1638	1	14	1	M53_02-Dec_4	1.219512195	1.333333333	magic
M53	4	2	12	2-Dec	2015		2	27	27	75	82	7	1638	1	15	1	M53_02-Dec_4	1.219512195	1.333333333	magic
M53	4	2	12	2-Dec	2015		2	27	27	75	82	7	1638	1	16	0	M53_02-Dec_4	0	0	magic
M53	4	2	12	2-Dec	2015		2	27	27	75	82	7	1638	1	17	2	M53_02-Dec_4	2.43902439	2.666666667	magic
M53	4	2	12	2-Dec	2015		2	27	27	75	82	7	1638	1	18	0	M53_02-Dec_4	0	0	magic
M53	4	2	12	2-Dec	2015		2	27	27	75	82	7	1638	1	19	0	M53_02-Dec_4	0	0	magic
M53	4	2	12	2-Dec	2015		2	27	27	75	82	7	1638	1	20	1	M53_02-Dec_4	1.219512195	1.333333333	magic
M53	5	2	12	2-Dec	2015		2	27	27	54	96	42	1640	3	1	0	M53_02-Dec_5	0	0	magic
M53	5	2	12	2-Dec	2015		2	27	27	54	96	42	1640	3	2	0	M53_02-Dec_5	0	0	magic
M53	5	2	12	2-Dec	2015		2	27	27	54	96	42	1640	3	3	0	M53_02-Dec_5	0	0	magic
M53	5	2	12	2-Dec	2015		2	27	27	54	96	42	1640	3	4	1	M53_02-Dec_5	1.041666667	1.851851852	magic
M53	5	2	12	2-Dec	2015		2	27	27	54	96	42	1640	3	5	9	M53_02-Dec_5	9.375	16.66666667	magic
M53	5	2	12	2-Dec	2015		2	27	27	54	96	42	1640	3	6	8	M53_02-Dec_5	8.333333333	14.81481481	magic
M53	5	2	12	2-Dec	2015		2	27	27	54	96	42	1640	3	7	9	M53_02-Dec_5	9.375	16.66666667	magic
M53	5	2	12	2-Dec	2015		2	27	27	54	96	42	1640	3	8	1	M53_02-Dec_5	1.041666667	1.851851852	magic
M53	5	2	12	2-Dec	2015		2	27	27	54	96	42	1640	3	9	7	M53_02-Dec_5	7.291666667	12.96296296	magic
M53	5	2	12	2-Dec	2015		2	27	27	54	96	42	1640	3	10	7	M53_02-Dec_5	7.291666667	12.96296296	magic
M53	5	2	12	2-Dec	2015		2	27	27	54	96	42	1640	3	11	2	M53_02-Dec_5	2.083333333	3.703703704	magic
M53	5	2	12	2-Dec	2015		2	27	27	54	96	42	1640	3	12	6	M53_02-Dec_5	6.25	11.11111111	magic
M53	5	2	12	2-Dec	2015		2	27	27	54	96	42	1640	3	13	2	M53_02-Dec_5	2.083333333	3.703703704	magic
M53	5	2	12	2-Dec	2015		2	27	27	54	96	42	1640	3	14	0	M53_02-Dec_5	0	0	magic
M53	5	2	12	2-Dec	2015		2	27	27	54	96	42	1640	3	15	1	M53_02-Dec_5	1.041666667	1.851851852	magic
M53	5	2	12	2-Dec	2015		2	27	27	54	96	42	1640	3	16	1	M53_02-Dec_5	1.041666667	1.851851852	magic
M53	5	2	12	2-Dec	2015		2	27	27	54	96	42	1640	3	17	0	M53_02-Dec_5	0	0	magic
M53	5	2	12	2-Dec	2015		2	27	27	54	96	42	1640	3	18	0	M53_02-Dec_5	0	0	magic
M53	5	2	12	2-Dec	2015		2	27	27	54	96	42	1640	3	19	0	M53_02-Dec_5	0	0	magic
M53	5	2	12	2-Dec	2015		2	27	27	54	96	42	1640	3	20	0	M53_02-Dec_5	0	0	magic
M53	6	2	12	2-Dec	2015		2	27	27	47	103	56	1641	4	1	0	M53_02-Dec_6	0	0	magic
M53	6	2	12	2-Dec	2015		2	27	27	47	103	56	1641	4	2	1	M53_02-Dec_6	0.970873786	2.127659574	magic
M53	6	2	12	2-Dec	2015		2	27	27	47	103	56	1641	4	3	3	M53_02-Dec_6	2.912621359	6.382978723	magic
M53	6	2	12	2-Dec	2015		2	27	27	47	103	56	1641	4	4	3	M53_02-Dec_6	2.912621359	6.382978723	magic
M53	6	2	12	2-Dec	2015		2	27	27	47	103	56	1641	4	5	8	M53_02-Dec_6	7.766990291	17.0212766	magic
M53	6	2	12	2-Dec	2015		2	27	27	47	103	56	1641	4	6	5	M53_02-Dec_6	4.854368932	10.63829787	magic
M53	6	2	12	2-Dec	2015		2	27	27	47	103	56	1641	4	7	3	M53_02-Dec_6	2.912621359	6.382978723	magic
M53	6	2	12	2-Dec	2015		2	27	27	47	103	56	1641	4	8	6	M53_02-Dec_6	5.825242718	12.76595745	magic
M53	6	2	12	2-Dec	2015		2	27	27	47	103	56	1641	4	9	4	M53_02-Dec_6	3.883495146	8.510638298	magic
M53	6	2	12	2-Dec	2015		2	27	27	47	103	56	1641	4	10	1	M53_02-Dec_6	0.970873786	2.127659574	magic
M53	6	2	12	2-Dec	2015		2	27	27	47	103	56	1641	4	11	2	M53_02-Dec_6	1.941747573	4.255319149	magic
M53	6	2	12	2-Dec	2015		2	27	27	47	103	56	1641	4	12	5	M53_02-Dec_6	4.854368932	10.63829787	magic
M53	6	2	12	2-Dec	2015		2	27	27	47	103	56	1641	4	13	2	M53_02-Dec_6	1.941747573	4.255319149	magic
M53	6	2	12	2-Dec	2015		2	27	27	47	103	56	1641	4	14	0	M53_02-Dec_6	0	0	magic
M53	6	2	12	2-Dec	2015		2	27	27	47	103	56	1641	4	15	1	M53_02-Dec_6	0.970873786	2.127659574	magic
M53	6	2	12	2-Dec	2015		2	27	27	47	103	56	1641	4	16	2	M53_02-Dec_6	1.941747573	4.255319149	magic
M53	6	2	12	2-Dec	2015		2	27	27	47	103	56	1641	4	17	1	M53_02-Dec_6	0.970873786	2.127659574	magic
M53	6	2	12	2-Dec	2015		2	27	27	47	103	56	1641	4	18	0	M53_02-Dec_6	0	0	magic
M53	6	2	12	2-Dec	2015		2	27	27	47	103	56	1641	4	19	0	M53_02-Dec_6	0	0	magic
M53	6	2	12	2-Dec	2015		2	27	27	47	103	56	1641	4	20	0	M53_02-Dec_6	0	0	magic
