# Supplementary material for: An ABA-GA bistable switch can account for natural variation in the variability of Arabidopsis seed germination time
Source: eLife. 2021 Jun 1;10:e59485. doi: 10.7554/eLife.59485 (PMC8169117; doi:10.7554/eLife.59485)
Supplement: Figure 2—figure supplement 1—source data 2. [file elife-59485-fig2-figsupp1-data2.tds]

Magic_line	Plant	Silique	Top_or_bottom	comments	Sowing.day	Sowing.month	Sowing_date	Year	Scoring.date	DAR	Total.germinated	Total	NonGer.at.end.of.scoring.period	comments.1	id	day	number	name	perc	perc_total_ger	germ_frac	cumgerm_frac
182	1	1	bottom	NA	19	10	19-Oct	2017	18/12/2017	29	15	15	0	NA	160	1	0	182_1_1_19-Oct	0	0	0	0
182	1	1	top	NA	19	10	19-Oct	2017	18/12/2017	29	6	6	0	NA	161	1	0	182_1_1_19-Oct	0	0	0	0
182	1	10	bottom	NA	19	10	19-Oct	2017	18/12/2017	29	9	12	3	NA	176	1	0	182_1_10_19-Oct	0	0	0	0
182	1	10	top	NA	19	10	19-Oct	2017	18/12/2017	29	6	6	0	NA	177	1	0	182_1_10_19-Oct	0	0	0	0
182	1	2	bottom	NA	19	10	19-Oct	2017	18/12/2017	29	22	22	0	NA	178	1	0	182_1_2_19-Oct	0	0	0	0
182	1	2	top	NA	19	10	19-Oct	2017	18/12/2017	29	10	10	0	NA	179	1	0	182_1_2_19-Oct	0	0	0	0
182	1	3	bottom	NA	19	10	19-Oct	2017	18/12/2017	29	19	19	0	NA	162	1	0	182_1_3_19-Oct	0	0	0	0
182	1	3	top	NA	19	10	19-Oct	2017	18/12/2017	29	5	5	0	NA	163	1	0	182_1_3_19-Oct	0	0	0	0
182	1	4	bottom	NA	19	10	19-Oct	2017	18/12/2017	29	8	9	1	NA	164	1	0	182_1_4_19-Oct	0	0	0	0
182	1	4	top	NA	19	10	19-Oct	2017	18/12/2017	29	5	6	1	NA	165	1	0	182_1_4_19-Oct	0	0	0	0
182	1	5	bottom	NA	19	10	19-Oct	2017	18/12/2017	29	16	22	6	NA	166	1	0	182_1_5_19-Oct	0	0	0	0
182	1	5	top	NA	19	10	19-Oct	2017	18/12/2017	29	12	15	3	NA	167	1	0	182_1_5_19-Oct	0	0	0	0
182	1	6	bottom	NA	19	10	19-Oct	2017	18/12/2017	29	15	15	0	NA	168	1	0	182_1_6_19-Oct	0	0	0	0
182	1	6	top	NA	19	10	19-Oct	2017	18/12/2017	29	10	12	2	NA	169	1	0	182_1_6_19-Oct	0	0	0	0
182	1	7	bottom	NA	19	10	19-Oct	2017	18/12/2017	29	20	20	0	NA	170	1	0	182_1_7_19-Oct	0	0	0	0
182	1	7	top	NA	19	10	19-Oct	2017	18/12/2017	29	17	17	0	NA	171	1	0	182_1_7_19-Oct	0	0	0	0
182	1	8	bottom	NA	19	10	19-Oct	2017	18/12/2017	29	12	12	0	NA	172	1	0	182_1_8_19-Oct	0	0	0	0
182	1	8	top	NA	19	10	19-Oct	2017	18/12/2017	29	9	9	0	NA	173	1	0	182_1_8_19-Oct	0	0	0	0
182	1	9	bottom	NA	19	10	19-Oct	2017	18/12/2017	29	14	14	0	NA	174	1	0	182_1_9_19-Oct	0	0	0	0
182	1	9	top	NA	19	10	19-Oct	2017	18/12/2017	29	17	17	0	NA	175	1	0	182_1_9_19-Oct	0	0	0	0
182	2	1	bottom	NA	19	10	19-Oct	2017	18/12/2017	29	16	16	0	NA	180	1	0	182_2_1_19-Oct	0	0	0	0
182	2	1	top	NA	19	10	19-Oct	2017	18/12/2017	29	13	13	0	NA	181	1	0	182_2_1_19-Oct	0	0	0	0
182	2	3	bottom	NA	19	10	19-Oct	2017	18/12/2017	29	9	9	0	NA	182	1	0	182_2_3_19-Oct	0	0	0	0
182	2	3	top	NA	19	10	19-Oct	2017	18/12/2017	29	10	10	0	NA	183	1	0	182_2_3_19-Oct	0	0	0	0
182	2	4	bottom	NA	19	10	19-Oct	2017	18/12/2017	29	13	14	1	NA	184	1	0	182_2_4_19-Oct	0	0	0	0
182	2	4	top	NA	19	10	19-Oct	2017	18/12/2017	29	14	14	0	NA	185	1	0	182_2_4_19-Oct	0	0	0	0
182	2	5	bottom	NA	19	10	19-Oct	2017	18/12/2017	29	18	18	0	NA	186	1	0	182_2_5_19-Oct	0	0	0	0
182	2	5	top	NA	19	10	19-Oct	2017	18/12/2017	29	12	13	1	NA	187	1	0	182_2_5_19-Oct	0	0	0	0
182	2	6	bottom	NA	19	10	19-Oct	2017	18/12/2017	29	11	20	9	NA	188	1	0	182_2_6_19-Oct	0	0	0	0
182	2	6	top	NA	19	10	19-Oct	2017	18/12/2017	29	16	18	2	NA	189	1	0	182_2_6_19-Oct	0	0	0	0
182	2	7	bottom	NA	19	10	19-Oct	2017	18/12/2017	29	11	21	10	NA	190	1	0	182_2_7_19-Oct	0	0	0	0
182	2	7	top	NA	19	10	19-Oct	2017	18/12/2017	29	11	14	3	NA	191	1	0	182_2_7_19-Oct	0	0	0	0
182	3	1	bottom	NA	19	10	19-Oct	2017	18/12/2017	29	9	12	3	NA	192	1	0	182_3_1_19-Oct	0	0	0	0
182	3	1	top	NA	19	10	19-Oct	2017	18/12/2017	29	7	7	0	NA	193	1	0	182_3_1_19-Oct	0	0	0	0
182	3	3	bottom	NA	19	10	19-Oct	2017	18/12/2017	29	9	13	4	NA	194	1	0	182_3_3_19-Oct	0	0	0	0
182	3	3	top	NA	19	10	19-Oct	2017	18/12/2017	29	7	7	0	NA	195	1	0	182_3_3_19-Oct	0	0	0	0
182	3	4	bottom	NA	19	10	19-Oct	2017	18/12/2017	29	5	5	0	NA	196	1	0	182_3_4_19-Oct	0	0	0	0
182	3	4	top	NA	19	10	19-Oct	2017	18/12/2017	29	13	13	0	NA	197	1	0	182_3_4_19-Oct	0	0	0	0
182	3	5	bottom	NA	19	10	19-Oct	2017	18/12/2017	29	13	13	0	NA	198	1	0	182_3_5_19-Oct	0	0	0	0
182	3	5	top	NA	19	10	19-Oct	2017	18/12/2017	29	10	10	0	NA	199	1	0	182_3_5_19-Oct	0	0	0	0
182	3	6	bottom	NA	19	10	19-Oct	2017	18/12/2017	29	8	9	1	NA	200	1	0	182_3_6_19-Oct	0	0	0	0
182	3	6	top	NA	19	10	19-Oct	2017	18/12/2017	29	6	7	1	NA	201	1	0	182_3_6_19-Oct	0	0	0	0
182	3	7	bottom	NA	19	10	19-Oct	2017	18/12/2017	29	22	24	2	NA	202	1	0	182_3_7_19-Oct	0	0	0	0
182	3	7	top	NA	19	10	19-Oct	2017	18/12/2017	29	14	15	1	NA	203	1	0	182_3_7_19-Oct	0	0	0	0
53	1	1	bottom	NA	19	10	19-Oct	2017	18/12/2017	29	13	16	3	NA	100	1	0	53_1_1_19-Oct	0	0	0	0
53	1	1	top	NA	19	10	19-Oct	2017	18/12/2017	29	12	15	3	NA	101	1	0	53_1_1_19-Oct	0	0	0	0
53	2	1	bottom	NA	19	10	19-Oct	2017	18/12/2017	29	19	20	1	NA	102	1	0	53_2_1_19-Oct	0	0	0	0
53	2	1	top	NA	19	10	19-Oct	2017	18/12/2017	29	19	19	0	NA	103	1	0	53_2_1_19-Oct	0	0	0	0
53	3	1	bottom	NA	19	10	19-Oct	2017	18/12/2017	29	11	14	3	NA	104	1	0	53_3_1_19-Oct	0	0	0	0
53	3	1	top	NA	19	10	19-Oct	2017	18/12/2017	29	12	13	1	NA	105	1	0	53_3_1_19-Oct	0	0	0	0
53	4	1	bottom	NA	19	10	19-Oct	2017	18/12/2017	29	3	19	16	NA	106	1	0	53_4_1_19-Oct	0	0	0	0
53	4	1	top	NA	19	10	19-Oct	2017	18/12/2017	29	5	12	7	NA	107	1	0	53_4_1_19-Oct	0	0	0	0
53	5	1	bottom	NA	19	10	19-Oct	2017	18/12/2017	29	21	23	2	NA	108	1	0	53_5_1_19-Oct	0	0	0	0
53	5	1	top	NA	19	10	19-Oct	2017	18/12/2017	29	17	17	0	NA	109	1	0	53_5_1_19-Oct	0	0	0	0
53	6	1	bottom	NA	19	10	19-Oct	2017	18/12/2017	29	3	10	7	NA	110	1	0	53_6_1_19-Oct	0	0	0	0
53	6	1	top	NA	19	10	19-Oct	2017	18/12/2017	29	9	11	2	NA	111	1	0	53_6_1_19-Oct	0	0	0	0
53	7	1	bottom	NA	19	10	19-Oct	2017	18/12/2017	29	18	22	4	NA	112	1	0	53_7_1_19-Oct	0	0	0	0
53	7	1	top	NA	19	10	19-Oct	2017	18/12/2017	29	17	17	0	NA	113	1	0	53_7_1_19-Oct	0	0	0	0
53	8	1	bottom	NA	19	10	19-Oct	2017	18/12/2017	29	21	22	1	NA	114	1	0	53_8_1_19-Oct	0	0	0	0
53	8	1	top	NA	19	10	19-Oct	2017	18/12/2017	29	20	20	0	NA	115	1	0	53_8_1_19-Oct	0	0	0	0
53	9	1	bottom	NA	19	10	19-Oct	2017	18/12/2017	29	10	18	8	NA	116	1	0	53_9_1_19-Oct	0	0	0	0
53	9	1	top	NA	19	10	19-Oct	2017	18/12/2017	29	11	12	1	NA	117	1	0	53_9_1_19-Oct	0	0	0	0
53	10	1	bottom	NA	19	10	19-Oct	2017	18/12/2017	29	6	22	16	NA	118	1	0	53_10_1_19-Oct	0	0	0	0
53	10	1	top	NA	19	10	19-Oct	2017	18/12/2017	29	14	14	0	NA	119	1	0	53_10_1_19-Oct	0	0	0	0
182	1	1	bottom	NA	19	10	19-Oct	2017	18/12/2017	29	15	15	0	NA	160	2	0	182_1_1_19-Oct	0	0	0	0
182	1	1	top	NA	19	10	19-Oct	2017	18/12/2017	29	6	6	0	NA	161	2	0	182_1_1_19-Oct	0	0	0	0
182	1	10	bottom	NA	19	10	19-Oct	2017	18/12/2017	29	9	12	3	NA	176	2	0	182_1_10_19-Oct	0	0	0	0
182	1	10	top	NA	19	10	19-Oct	2017	18/12/2017	29	6	6	0	NA	177	2	0	182_1_10_19-Oct	0	0	0	0
182	1	2	bottom	NA	19	10	19-Oct	2017	18/12/2017	29	22	22	0	NA	178	2	0	182_1_2_19-Oct	0	0	0	0
182	1	2	top	NA	19	10	19-Oct	2017	18/12/2017	29	10	10	0	NA	179	2	0	182_1_2_19-Oct	0	0	0	0
182	1	3	bottom	NA	19	10	19-Oct	2017	18/12/2017	29	19	19	0	NA	162	2	0	182_1_3_19-Oct	0	0	0	0
182	1	3	top	NA	19	10	19-Oct	2017	18/12/2017	29	5	5	0	NA	163	2	0	182_1_3_19-Oct	0	0	0	0
182	1	4	bottom	NA	19	10	19-Oct	2017	18/12/2017	29	8	9	1	NA	164	2	0	182_1_4_19-Oct	0	0	0	0
182	1	4	top	NA	19	10	19-Oct	2017	18/12/2017	29	5	6	1	NA	165	2	0	182_1_4_19-Oct	0	0	0	0
182	1	5	bottom	NA	19	10	19-Oct	2017	18/12/2017	29	16	22	6	NA	166	2	0	182_1_5_19-Oct	0	0	0	0
182	1	5	top	NA	19	10	19-Oct	2017	18/12/2017	29	12	15	3	NA	167	2	0	182_1_5_19-Oct	0	0	0	0
182	1	6	bottom	NA	19	10	19-Oct	2017	18/12/2017	29	15	15	0	NA	168	2	0	182_1_6_19-Oct	0	0	0	0
182	1	6	top	NA	19	10	19-Oct	2017	18/12/2017	29	10	12	2	NA	169	2	0	182_1_6_19-Oct	0	0	0	0
182	1	7	bottom	NA	19	10	19-Oct	2017	18/12/2017	29	20	20	0	NA	170	2	0	182_1_7_19-Oct	0	0	0	0
182	1	7	top	NA	19	10	19-Oct	2017	18/12/2017	29	17	17	0	NA	171	2	0	182_1_7_19-Oct	0	0	0	0
182	1	8	bottom	NA	19	10	19-Oct	2017	18/12/2017	29	12	12	0	NA	172	2	0	182_1_8_19-Oct	0	0	0	0
182	1	8	top	NA	19	10	19-Oct	2017	18/12/2017	29	9	9	0	NA	173	2	0	182_1_8_19-Oct	0	0	0	0
182	1	9	bottom	NA	19	10	19-Oct	2017	18/12/2017	29	14	14	0	NA	174	2	0	182_1_9_19-Oct	0	0	0	0
182	1	9	top	NA	19	10	19-Oct	2017	18/12/2017	29	17	17	0	NA	175	2	0	182_1_9_19-Oct	0	0	0	0
182	2	1	bottom	NA	19	10	19-Oct	2017	18/12/2017	29	16	16	0	NA	180	2	0	182_2_1_19-Oct	0	0	0	0
182	2	1	top	NA	19	10	19-Oct	2017	18/12/2017	29	13	13	0	NA	181	2	0	182_2_1_19-Oct	0	0	0	0
182	2	3	bottom	NA	19	10	19-Oct	2017	18/12/2017	29	9	9	0	NA	182	2	0	182_2_3_19-Oct	0	0	0	0
182	2	3	top	NA	19	10	19-Oct	2017	18/12/2017	29	10	10	0	NA	183	2	0	182_2_3_19-Oct	0	0	0	0
182	2	4	bottom	NA	19	10	19-Oct	2017	18/12/2017	29	13	14	1	NA	184	2	0	182_2_4_19-Oct	0	0	0	0
182	2	4	top	NA	19	10	19-Oct	2017	18/12/2017	29	14	14	0	NA	185	2	0	182_2_4_19-Oct	0	0	0	0
182	2	5	bottom	NA	19	10	19-Oct	2017	18/12/2017	29	18	18	0	NA	186	2	0	182_2_5_19-Oct	0	0	0	0
182	2	5	top	NA	19	10	19-Oct	2017	18/12/2017	29	12	13	1	NA	187	2	0	182_2_5_19-Oct	0	0	0	0
182	2	6	bottom	NA	19	10	19-Oct	2017	18/12/2017	29	11	20	9	NA	188	2	0	182_2_6_19-Oct	0	0	0	0
182	2	6	top	NA	19	10	19-Oct	2017	18/12/2017	29	16	18	2	NA	189	2	0	182_2_6_19-Oct	0	0	0	0
182	2	7	bottom	NA	19	10	19-Oct	2017	18/12/2017	29	11	21	10	NA	190	2	0	182_2_7_19-Oct	0	0	0	0
182	2	7	top	NA	19	10	19-Oct	2017	18/12/2017	29	11	14	3	NA	191	2	0	182_2_7_19-Oct	0	0	0	0
182	3	1	bottom	NA	19	10	19-Oct	2017	18/12/2017	29	9	12	3	NA	192	2	0	182_3_1_19-Oct	0	0	0	0
182	3	1	top	NA	19	10	19-Oct	2017	18/12/2017	29	7	7	0	NA	193	2	0	182_3_1_19-Oct	0	0	0	0
182	3	3	bottom	NA	19	10	19-Oct	2017	18/12/2017	29	9	13	4	NA	194	2	0	182_3_3_19-Oct	0	0	0	0
182	3	3	top	NA	19	10	19-Oct	2017	18/12/2017	29	7	7	0	NA	195	2	0	182_3_3_19-Oct	0	0	0	0
182	3	4	bottom	NA	19	10	19-Oct	2017	18/12/2017	29	5	5	0	NA	196	2	0	182_3_4_19-Oct	0	0	0	0
182	3	4	top	NA	19	10	19-Oct	2017	18/12/2017	29	13	13	0	NA	197	2	0	182_3_4_19-Oct	0	0	0	0
182	3	5	bottom	NA	19	10	19-Oct	2017	18/12/2017	29	13	13	0	NA	198	2	0	182_3_5_19-Oct	0	0	0	0
182	3	5	top	NA	19	10	19-Oct	2017	18/12/2017	29	10	10	0	NA	199	2	0	182_3_5_19-Oct	0	0	0	0
182	3	6	bottom	NA	19	10	19-Oct	2017	18/12/2017	29	8	9	1	NA	200	2	0	182_3_6_19-Oct	0	0	0	0
182	3	6	top	NA	19	10	19-Oct	2017	18/12/2017	29	6	7	1	NA	201	2	0	182_3_6_19-Oct	0	0	0	0
182	3	7	bottom	NA	19	10	19-Oct	2017	18/12/2017	29	22	24	2	NA	202	2	0	182_3_7_19-Oct	0	0	0	0
182	3	7	top	NA	19	10	19-Oct	2017	18/12/2017	29	14	15	1	NA	203	2	0	182_3_7_19-Oct	0	0	0	0
53	1	1	bottom	NA	19	10	19-Oct	2017	18/12/2017	29	13	16	3	NA	100	2	0	53_1_1_19-Oct	0	0	0	0
53	1	1	top	NA	19	10	19-Oct	2017	18/12/2017	29	12	15	3	NA	101	2	0	53_1_1_19-Oct	0	0	0	0
53	2	1	bottom	NA	19	10	19-Oct	2017	18/12/2017	29	19	20	1	NA	102	2	0	53_2_1_19-Oct	0	0	0	0
53	2	1	top	NA	19	10	19-Oct	2017	18/12/2017	29	19	19	0	NA	103	2	0	53_2_1_19-Oct	0	0	0	0
53	3	1	bottom	NA	19	10	19-Oct	2017	18/12/2017	29	11	14	3	NA	104	2	0	53_3_1_19-Oct	0	0	0	0
53	3	1	top	NA	19	10	19-Oct	2017	18/12/2017	29	12	13	1	NA	105	2	0	53_3_1_19-Oct	0	0	0	0
53	4	1	bottom	NA	19	10	19-Oct	2017	18/12/2017	29	3	19	16	NA	106	2	0	53_4_1_19-Oct	0	0	0	0
53	4	1	top	NA	19	10	19-Oct	2017	18/12/2017	29	5	12	7	NA	107	2	0	53_4_1_19-Oct	0	0	0	0
53	5	1	bottom	NA	19	10	19-Oct	2017	18/12/2017	29	21	23	2	NA	108	2	0	53_5_1_19-Oct	0	0	0	0
53	5	1	top	NA	19	10	19-Oct	2017	18/12/2017	29	17	17	0	NA	109	2	0	53_5_1_19-Oct	0	0	0	0
53	6	1	bottom	NA	19	10	19-Oct	2017	18/12/2017	29	3	10	7	NA	110	2	0	53_6_1_19-Oct	0	0	0	0
53	6	1	top	NA	19	10	19-Oct	2017	18/12/2017	29	9	11	2	NA	111	2	0	53_6_1_19-Oct	0	0	0	0
53	7	1	bottom	NA	19	10	19-Oct	2017	18/12/2017	29	18	22	4	NA	112	2	0	53_7_1_19-Oct	0	0	0	0
53	7	1	top	NA	19	10	19-Oct	2017	18/12/2017	29	17	17	0	NA	113	2	0	53_7_1_19-Oct	0	0	0	0
53	8	1	bottom	NA	19	10	19-Oct	2017	18/12/2017	29	21	22	1	NA	114	2	0	53_8_1_19-Oct	0	0	0	0
53	8	1	top	NA	19	10	19-Oct	2017	18/12/2017	29	20	20	0	NA	115	2	0	53_8_1_19-Oct	0	0	0	0
53	9	1	bottom	NA	19	10	19-Oct	2017	18/12/2017	29	10	18	8	NA	116	2	0	53_9_1_19-Oct	0	0	0	0
53	9	1	top	NA	19	10	19-Oct	2017	18/12/2017	29	11	12	1	NA	117	2	0	53_9_1_19-Oct	0	0	0	0
53	10	1	bottom	NA	19	10	19-Oct	2017	18/12/2017	29	6	22	16	NA	118	2	0	53_10_1_19-Oct	0	0	0	0
53	10	1	top	NA	19	10	19-Oct	2017	18/12/2017	29	14	14	0	NA	119	2	0	53_10_1_19-Oct	0	0	0	0
182	1	1	bottom	NA	19	10	19-Oct	2017	18/12/2017	29	15	15	0	NA	160	3	0	182_1_1_19-Oct	0	0	0	0
182	1	1	top	NA	19	10	19-Oct	2017	18/12/2017	29	6	6	0	NA	161	3	2	182_1_1_19-Oct	33.33333333	33.33333333	0.333333333	0.333333333
182	1	10	bottom	NA	19	10	19-Oct	2017	18/12/2017	29	9	12	3	NA	176	3	1	182_1_10_19-Oct	8.333333333	11.11111111	0.111111111	0.111111111
182	1	10	top	NA	19	10	19-Oct	2017	18/12/2017	29	6	6	0	NA	177	3	0	182_1_10_19-Oct	0	0	0	0
182	1	2	bottom	NA	19	10	19-Oct	2017	18/12/2017	29	22	22	0	NA	178	3	9	182_1_2_19-Oct	40.90909091	40.90909091	0.409090909	0.409090909
182	1	2	top	NA	19	10	19-Oct	2017	18/12/2017	29	10	10	0	NA	179	3	10	182_1_2_19-Oct	100	100	1	1
182	1	3	bottom	NA	19	10	19-Oct	2017	18/12/2017	29	19	19	0	NA	162	3	0	182_1_3_19-Oct	0	0	0	0
182	1	3	top	NA	19	10	19-Oct	2017	18/12/2017	29	5	5	0	NA	163	3	0	182_1_3_19-Oct	0	0	0	0
182	1	4	bottom	NA	19	10	19-Oct	2017	18/12/2017	29	8	9	1	NA	164	3	1	182_1_4_19-Oct	11.11111111	12.5	0.125	0.125
182	1	4	top	NA	19	10	19-Oct	2017	18/12/2017	29	5	6	1	NA	165	3	1	182_1_4_19-Oct	16.66666667	20	0.2	0.2
182	1	5	bottom	NA	19	10	19-Oct	2017	18/12/2017	29	16	22	6	NA	166	3	2	182_1_5_19-Oct	9.090909091	12.5	0.125	0.125
182	1	5	top	NA	19	10	19-Oct	2017	18/12/2017	29	12	15	3	NA	167	3	1	182_1_5_19-Oct	6.666666667	8.333333333	0.083333333	0.083333333
182	1	6	bottom	NA	19	10	19-Oct	2017	18/12/2017	29	15	15	0	NA	168	3	0	182_1_6_19-Oct	0	0	0	0
182	1	6	top	NA	19	10	19-Oct	2017	18/12/2017	29	10	12	2	NA	169	3	2	182_1_6_19-Oct	16.66666667	20	0.2	0.2
182	1	7	bottom	NA	19	10	19-Oct	2017	18/12/2017	29	20	20	0	NA	170	3	0	182_1_7_19-Oct	0	0	0	0
182	1	7	top	NA	19	10	19-Oct	2017	18/12/2017	29	17	17	0	NA	171	3	2	182_1_7_19-Oct	11.76470588	11.76470588	0.117647059	0.117647059
182	1	8	bottom	NA	19	10	19-Oct	2017	18/12/2017	29	12	12	0	NA	172	3	4	182_1_8_19-Oct	33.33333333	33.33333333	0.333333333	0.333333333
182	1	8	top	NA	19	10	19-Oct	2017	18/12/2017	29	9	9	0	NA	173	3	9	182_1_8_19-Oct	100	100	1	1
182	1	9	bottom	NA	19	10	19-Oct	2017	18/12/2017	29	14	14	0	NA	174	3	1	182_1_9_19-Oct	7.142857143	7.142857143	0.071428571	0.071428571
182	1	9	top	NA	19	10	19-Oct	2017	18/12/2017	29	17	17	0	NA	175	3	2	182_1_9_19-Oct	11.76470588	11.76470588	0.117647059	0.117647059
182	2	1	bottom	NA	19	10	19-Oct	2017	18/12/2017	29	16	16	0	NA	180	3	0	182_2_1_19-Oct	0	0	0	0
182	2	1	top	NA	19	10	19-Oct	2017	18/12/2017	29	13	13	0	NA	181	3	0	182_2_1_19-Oct	0	0	0	0
182	2	3	bottom	NA	19	10	19-Oct	2017	18/12/2017	29	9	9	0	NA	182	3	2	182_2_3_19-Oct	22.22222222	22.22222222	0.222222222	0.222222222
182	2	3	top	NA	19	10	19-Oct	2017	18/12/2017	29	10	10	0	NA	183	3	1	182_2_3_19-Oct	10	10	0.1	0.1
182	2	4	bottom	NA	19	10	19-Oct	2017	18/12/2017	29	13	14	1	NA	184	3	2	182_2_4_19-Oct	14.28571429	15.38461538	0.153846154	0.153846154
182	2	4	top	NA	19	10	19-Oct	2017	18/12/2017	29	14	14	0	NA	185	3	0	182_2_4_19-Oct	0	0	0	0
182	2	5	bottom	NA	19	10	19-Oct	2017	18/12/2017	29	18	18	0	NA	186	3	1	182_2_5_19-Oct	5.555555556	5.555555556	0.055555556	0.055555556
182	2	5	top	NA	19	10	19-Oct	2017	18/12/2017	29	12	13	1	NA	187	3	0	182_2_5_19-Oct	0	0	0	0
182	2	6	bottom	NA	19	10	19-Oct	2017	18/12/2017	29	11	20	9	NA	188	3	0	182_2_6_19-Oct	0	0	0	0
182	2	6	top	NA	19	10	19-Oct	2017	18/12/2017	29	16	18	2	NA	189	3	1	182_2_6_19-Oct	5.555555556	6.25	0.0625	0.0625
182	2	7	bottom	NA	19	10	19-Oct	2017	18/12/2017	29	11	21	10	NA	190	3	0	182_2_7_19-Oct	0	0	0	0
182	2	7	top	NA	19	10	19-Oct	2017	18/12/2017	29	11	14	3	NA	191	3	0	182_2_7_19-Oct	0	0	0	0
182	3	1	bottom	NA	19	10	19-Oct	2017	18/12/2017	29	9	12	3	NA	192	3	3	182_3_1_19-Oct	25	33.33333333	0.333333333	0.333333333
182	3	1	top	NA	19	10	19-Oct	2017	18/12/2017	29	7	7	0	NA	193	3	0	182_3_1_19-Oct	0	0	0	0
182	3	3	bottom	NA	19	10	19-Oct	2017	18/12/2017	29	9	13	4	NA	194	3	0	182_3_3_19-Oct	0	0	0	0
182	3	3	top	NA	19	10	19-Oct	2017	18/12/2017	29	7	7	0	NA	195	3	0	182_3_3_19-Oct	0	0	0	0
182	3	4	bottom	NA	19	10	19-Oct	2017	18/12/2017	29	5	5	0	NA	196	3	0	182_3_4_19-Oct	0	0	0	0
182	3	4	top	NA	19	10	19-Oct	2017	18/12/2017	29	13	13	0	NA	197	3	0	182_3_4_19-Oct	0	0	0	0
182	3	5	bottom	NA	19	10	19-Oct	2017	18/12/2017	29	13	13	0	NA	198	3	1	182_3_5_19-Oct	7.692307692	7.692307692	0.076923077	0.076923077
182	3	5	top	NA	19	10	19-Oct	2017	18/12/2017	29	10	10	0	NA	199	3	1	182_3_5_19-Oct	10	10	0.1	0.1
182	3	6	bottom	NA	19	10	19-Oct	2017	18/12/2017	29	8	9	1	NA	200	3	0	182_3_6_19-Oct	0	0	0	0
182	3	6	top	NA	19	10	19-Oct	2017	18/12/2017	29	6	7	1	NA	201	3	0	182_3_6_19-Oct	0	0	0	0
182	3	7	bottom	NA	19	10	19-Oct	2017	18/12/2017	29	22	24	2	NA	202	3	0	182_3_7_19-Oct	0	0	0	0
182	3	7	top	NA	19	10	19-Oct	2017	18/12/2017	29	14	15	1	NA	203	3	1	182_3_7_19-Oct	6.666666667	7.142857143	0.071428571	0.071428571
53	1	1	bottom	NA	19	10	19-Oct	2017	18/12/2017	29	13	16	3	NA	100	3	6	53_1_1_19-Oct	37.5	46.15384615	0.461538462	0.461538462
53	1	1	top	NA	19	10	19-Oct	2017	18/12/2017	29	12	15	3	NA	101	3	1	53_1_1_19-Oct	6.666666667	8.333333333	0.083333333	0.083333333
53	2	1	bottom	NA	19	10	19-Oct	2017	18/12/2017	29	19	20	1	NA	102	3	1	53_2_1_19-Oct	5	5.263157895	0.052631579	0.052631579
53	2	1	top	NA	19	10	19-Oct	2017	18/12/2017	29	19	19	0	NA	103	3	0	53_2_1_19-Oct	0	0	0	0
53	3	1	bottom	NA	19	10	19-Oct	2017	18/12/2017	29	11	14	3	NA	104	3	2	53_3_1_19-Oct	14.28571429	18.18181818	0.181818182	0.181818182
53	3	1	top	NA	19	10	19-Oct	2017	18/12/2017	29	12	13	1	NA	105	3	4	53_3_1_19-Oct	30.76923077	33.33333333	0.333333333	0.333333333
53	4	1	bottom	NA	19	10	19-Oct	2017	18/12/2017	29	3	19	16	NA	106	3	0	53_4_1_19-Oct	0	0	0	0
53	4	1	top	NA	19	10	19-Oct	2017	18/12/2017	29	5	12	7	NA	107	3	0	53_4_1_19-Oct	0	0	0	0
53	5	1	bottom	NA	19	10	19-Oct	2017	18/12/2017	29	21	23	2	NA	108	3	6	53_5_1_19-Oct	26.08695652	28.57142857	0.285714286	0.285714286
53	5	1	top	NA	19	10	19-Oct	2017	18/12/2017	29	17	17	0	NA	109	3	5	53_5_1_19-Oct	29.41176471	29.41176471	0.294117647	0.294117647
53	6	1	bottom	NA	19	10	19-Oct	2017	18/12/2017	29	3	10	7	NA	110	3	0	53_6_1_19-Oct	0	0	0	0
53	6	1	top	NA	19	10	19-Oct	2017	18/12/2017	29	9	11	2	NA	111	3	1	53_6_1_19-Oct	9.090909091	11.11111111	0.111111111	0.111111111
53	7	1	bottom	NA	19	10	19-Oct	2017	18/12/2017	29	18	22	4	NA	112	3	0	53_7_1_19-Oct	0	0	0	0
53	7	1	top	NA	19	10	19-Oct	2017	18/12/2017	29	17	17	0	NA	113	3	1	53_7_1_19-Oct	5.882352941	5.882352941	0.058823529	0.058823529
53	8	1	bottom	NA	19	10	19-Oct	2017	18/12/2017	29	21	22	1	NA	114	3	8	53_8_1_19-Oct	36.36363636	38.0952381	0.380952381	0.380952381
53	8	1	top	NA	19	10	19-Oct	2017	18/12/2017	29	20	20	0	NA	115	3	4	53_8_1_19-Oct	20	20	0.2	0.2
53	9	1	bottom	NA	19	10	19-Oct	2017	18/12/2017	29	10	18	8	NA	116	3	2	53_9_1_19-Oct	11.11111111	20	0.2	0.2
53	9	1	top	NA	19	10	19-Oct	2017	18/12/2017	29	11	12	1	NA	117	3	0	53_9_1_19-Oct	0	0	0	0
53	10	1	bottom	NA	19	10	19-Oct	2017	18/12/2017	29	6	22	16	NA	118	3	0	53_10_1_19-Oct	0	0	0	0
53	10	1	top	NA	19	10	19-Oct	2017	18/12/2017	29	14	14	0	NA	119	3	0	53_10_1_19-Oct	0	0	0	0
182	1	1	bottom	NA	19	10	19-Oct	2017	18/12/2017	29	15	15	0	NA	160	4	4	182_1_1_19-Oct	26.66666667	26.66666667	0.266666667	0.266666667
182	1	1	top	NA	19	10	19-Oct	2017	18/12/2017	29	6	6	0	NA	161	4	2	182_1_1_19-Oct	33.33333333	33.33333333	0.333333333	0.666666667
182	1	10	bottom	NA	19	10	19-Oct	2017	18/12/2017	29	9	12	3	NA	176	4	0	182_1_10_19-Oct	0	0	0	0.111111111
182	1	10	top	NA	19	10	19-Oct	2017	18/12/2017	29	6	6	0	NA	177	4	0	182_1_10_19-Oct	0	0	0	0
182	1	2	bottom	NA	19	10	19-Oct	2017	18/12/2017	29	22	22	0	NA	178	4	7	182_1_2_19-Oct	31.81818182	31.81818182	0.318181818	0.727272727
182	1	2	top	NA	19	10	19-Oct	2017	18/12/2017	29	10	10	0	NA	179	4	0	182_1_2_19-Oct	0	0	0	1
182	1	3	bottom	NA	19	10	19-Oct	2017	18/12/2017	29	19	19	0	NA	162	4	3	182_1_3_19-Oct	15.78947368	15.78947368	0.157894737	0.157894737
182	1	3	top	NA	19	10	19-Oct	2017	18/12/2017	29	5	5	0	NA	163	4	2	182_1_3_19-Oct	40	40	0.4	0.4
182	1	4	bottom	NA	19	10	19-Oct	2017	18/12/2017	29	8	9	1	NA	164	4	2	182_1_4_19-Oct	22.22222222	25	0.25	0.375
182	1	4	top	NA	19	10	19-Oct	2017	18/12/2017	29	5	6	1	NA	165	4	3	182_1_4_19-Oct	50	60	0.6	0.8
182	1	5	bottom	NA	19	10	19-Oct	2017	18/12/2017	29	16	22	6	NA	166	4	0	182_1_5_19-Oct	0	0	0	0.125
182	1	5	top	NA	19	10	19-Oct	2017	18/12/2017	29	12	15	3	NA	167	4	1	182_1_5_19-Oct	6.666666667	8.333333333	0.083333333	0.166666667
182	1	6	bottom	NA	19	10	19-Oct	2017	18/12/2017	29	15	15	0	NA	168	4	0	182_1_6_19-Oct	0	0	0	0
182	1	6	top	NA	19	10	19-Oct	2017	18/12/2017	29	10	12	2	NA	169	4	0	182_1_6_19-Oct	0	0	0	0.2
182	1	7	bottom	NA	19	10	19-Oct	2017	18/12/2017	29	20	20	0	NA	170	4	0	182_1_7_19-Oct	0	0	0	0
182	1	7	top	NA	19	10	19-Oct	2017	18/12/2017	29	17	17	0	NA	171	4	6	182_1_7_19-Oct	35.29411765	35.29411765	0.352941176	0.470588235
182	1	8	bottom	NA	19	10	19-Oct	2017	18/12/2017	29	12	12	0	NA	172	4	3	182_1_8_19-Oct	25	25	0.25	0.583333333
182	1	8	top	NA	19	10	19-Oct	2017	18/12/2017	29	9	9	0	NA	173	4	0	182_1_8_19-Oct	0	0	0	1
182	1	9	bottom	NA	19	10	19-Oct	2017	18/12/2017	29	14	14	0	NA	174	4	0	182_1_9_19-Oct	0	0	0	0.071428571
182	1	9	top	NA	19	10	19-Oct	2017	18/12/2017	29	17	17	0	NA	175	4	2	182_1_9_19-Oct	11.76470588	11.76470588	0.117647059	0.235294118
182	2	1	bottom	NA	19	10	19-Oct	2017	18/12/2017	29	16	16	0	NA	180	4	5	182_2_1_19-Oct	31.25	31.25	0.3125	0.3125
182	2	1	top	NA	19	10	19-Oct	2017	18/12/2017	29	13	13	0	NA	181	4	2	182_2_1_19-Oct	15.38461538	15.38461538	0.153846154	0.153846154
182	2	3	bottom	NA	19	10	19-Oct	2017	18/12/2017	29	9	9	0	NA	182	4	1	182_2_3_19-Oct	11.11111111	11.11111111	0.111111111	0.333333333
182	2	3	top	NA	19	10	19-Oct	2017	18/12/2017	29	10	10	0	NA	183	4	2	182_2_3_19-Oct	20	20	0.2	0.3
182	2	4	bottom	NA	19	10	19-Oct	2017	18/12/2017	29	13	14	1	NA	184	4	8	182_2_4_19-Oct	57.14285714	61.53846154	0.615384615	0.769230769
182	2	4	top	NA	19	10	19-Oct	2017	18/12/2017	29	14	14	0	NA	185	4	3	182_2_4_19-Oct	21.42857143	21.42857143	0.214285714	0.214285714
182	2	5	bottom	NA	19	10	19-Oct	2017	18/12/2017	29	18	18	0	NA	186	4	1	182_2_5_19-Oct	5.555555556	5.555555556	0.055555556	0.111111111
182	2	5	top	NA	19	10	19-Oct	2017	18/12/2017	29	12	13	1	NA	187	4	0	182_2_5_19-Oct	0	0	0	0
182	2	6	bottom	NA	19	10	19-Oct	2017	18/12/2017	29	11	20	9	NA	188	4	0	182_2_6_19-Oct	0	0	0	0
182	2	6	top	NA	19	10	19-Oct	2017	18/12/2017	29	16	18	2	NA	189	4	1	182_2_6_19-Oct	5.555555556	6.25	0.0625	0.125
182	2	7	bottom	NA	19	10	19-Oct	2017	18/12/2017	29	11	21	10	NA	190	4	0	182_2_7_19-Oct	0	0	0	0
182	2	7	top	NA	19	10	19-Oct	2017	18/12/2017	29	11	14	3	NA	191	4	0	182_2_7_19-Oct	0	0	0	0
182	3	1	bottom	NA	19	10	19-Oct	2017	18/12/2017	29	9	12	3	NA	192	4	0	182_3_1_19-Oct	0	0	0	0.333333333
182	3	1	top	NA	19	10	19-Oct	2017	18/12/2017	29	7	7	0	NA	193	4	0	182_3_1_19-Oct	0	0	0	0
182	3	3	bottom	NA	19	10	19-Oct	2017	18/12/2017	29	9	13	4	NA	194	4	0	182_3_3_19-Oct	0	0	0	0
182	3	3	top	NA	19	10	19-Oct	2017	18/12/2017	29	7	7	0	NA	195	4	2	182_3_3_19-Oct	28.57142857	28.57142857	0.285714286	0.285714286
182	3	4	bottom	NA	19	10	19-Oct	2017	18/12/2017	29	5	5	0	NA	196	4	0	182_3_4_19-Oct	0	0	0	0
182	3	4	top	NA	19	10	19-Oct	2017	18/12/2017	29	13	13	0	NA	197	4	5	182_3_4_19-Oct	38.46153846	38.46153846	0.384615385	0.384615385
182	3	5	bottom	NA	19	10	19-Oct	2017	18/12/2017	29	13	13	0	NA	198	4	0	182_3_5_19-Oct	0	0	0	0.076923077
182	3	5	top	NA	19	10	19-Oct	2017	18/12/2017	29	10	10	0	NA	199	4	8	182_3_5_19-Oct	80	80	0.8	0.9
182	3	6	bottom	NA	19	10	19-Oct	2017	18/12/2017	29	8	9	1	NA	200	4	0	182_3_6_19-Oct	0	0	0	0
182	3	6	top	NA	19	10	19-Oct	2017	18/12/2017	29	6	7	1	NA	201	4	0	182_3_6_19-Oct	0	0	0	0
182	3	7	bottom	NA	19	10	19-Oct	2017	18/12/2017	29	22	24	2	NA	202	4	0	182_3_7_19-Oct	0	0	0	0
182	3	7	top	NA	19	10	19-Oct	2017	18/12/2017	29	14	15	1	NA	203	4	1	182_3_7_19-Oct	6.666666667	7.142857143	0.071428571	0.142857143
53	1	1	bottom	NA	19	10	19-Oct	2017	18/12/2017	29	13	16	3	NA	100	4	4	53_1_1_19-Oct	25	30.76923077	0.307692308	0.769230769
53	1	1	top	NA	19	10	19-Oct	2017	18/12/2017	29	12	15	3	NA	101	4	4	53_1_1_19-Oct	26.66666667	33.33333333	0.333333333	0.416666667
53	2	1	bottom	NA	19	10	19-Oct	2017	18/12/2017	29	19	20	1	NA	102	4	5	53_2_1_19-Oct	25	26.31578947	0.263157895	0.315789474
53	2	1	top	NA	19	10	19-Oct	2017	18/12/2017	29	19	19	0	NA	103	4	6	53_2_1_19-Oct	31.57894737	31.57894737	0.315789474	0.315789474
53	3	1	bottom	NA	19	10	19-Oct	2017	18/12/2017	29	11	14	3	NA	104	4	4	53_3_1_19-Oct	28.57142857	36.36363636	0.363636364	0.545454545
53	3	1	top	NA	19	10	19-Oct	2017	18/12/2017	29	12	13	1	NA	105	4	1	53_3_1_19-Oct	7.692307692	8.333333333	0.083333333	0.416666667
53	4	1	bottom	NA	19	10	19-Oct	2017	18/12/2017	29	3	19	16	NA	106	4	0	53_4_1_19-Oct	0	0	0	0
53	4	1	top	NA	19	10	19-Oct	2017	18/12/2017	29	5	12	7	NA	107	4	0	53_4_1_19-Oct	0	0	0	0
53	5	1	bottom	NA	19	10	19-Oct	2017	18/12/2017	29	21	23	2	NA	108	4	12	53_5_1_19-Oct	52.17391304	57.14285714	0.571428571	0.857142857
53	5	1	top	NA	19	10	19-Oct	2017	18/12/2017	29	17	17	0	NA	109	4	5	53_5_1_19-Oct	29.41176471	29.41176471	0.294117647	0.588235294
53	6	1	bottom	NA	19	10	19-Oct	2017	18/12/2017	29	3	10	7	NA	110	4	0	53_6_1_19-Oct	0	0	0	0
53	6	1	top	NA	19	10	19-Oct	2017	18/12/2017	29	9	11	2	NA	111	4	3	53_6_1_19-Oct	27.27272727	33.33333333	0.333333333	0.444444444
53	7	1	bottom	NA	19	10	19-Oct	2017	18/12/2017	29	18	22	4	NA	112	4	5	53_7_1_19-Oct	22.72727273	27.77777778	0.277777778	0.277777778
53	7	1	top	NA	19	10	19-Oct	2017	18/12/2017	29	17	17	0	NA	113	4	2	53_7_1_19-Oct	11.76470588	11.76470588	0.117647059	0.176470588
53	8	1	bottom	NA	19	10	19-Oct	2017	18/12/2017	29	21	22	1	NA	114	4	9	53_8_1_19-Oct	40.90909091	42.85714286	0.428571429	0.80952381
53	8	1	top	NA	19	10	19-Oct	2017	18/12/2017	29	20	20	0	NA	115	4	4	53_8_1_19-Oct	20	20	0.2	0.4
53	9	1	bottom	NA	19	10	19-Oct	2017	18/12/2017	29	10	18	8	NA	116	4	2	53_9_1_19-Oct	11.11111111	20	0.2	0.4
53	9	1	top	NA	19	10	19-Oct	2017	18/12/2017	29	11	12	1	NA	117	4	1	53_9_1_19-Oct	8.333333333	9.090909091	0.090909091	0.090909091
53	10	1	bottom	NA	19	10	19-Oct	2017	18/12/2017	29	6	22	16	NA	118	4	0	53_10_1_19-Oct	0	0	0	0
53	10	1	top	NA	19	10	19-Oct	2017	18/12/2017	29	14	14	0	NA	119	4	2	53_10_1_19-Oct	14.28571429	14.28571429	0.142857143	0.142857143
182	1	1	bottom	NA	19	10	19-Oct	2017	18/12/2017	29	15	15	0	NA	160	5	4	182_1_1_19-Oct	26.66666667	26.66666667	0.266666667	0.533333333
182	1	1	top	NA	19	10	19-Oct	2017	18/12/2017	29	6	6	0	NA	161	5	1	182_1_1_19-Oct	16.66666667	16.66666667	0.166666667	0.833333333
182	1	10	bottom	NA	19	10	19-Oct	2017	18/12/2017	29	9	12	3	NA	176	5	0	182_1_10_19-Oct	0	0	0	0.111111111
182	1	10	top	NA	19	10	19-Oct	2017	18/12/2017	29	6	6	0	NA	177	5	0	182_1_10_19-Oct	0	0	0	0
182	1	2	bottom	NA	19	10	19-Oct	2017	18/12/2017	29	22	22	0	NA	178	5	1	182_1_2_19-Oct	4.545454545	4.545454545	0.045454545	0.772727273
182	1	2	top	NA	19	10	19-Oct	2017	18/12/2017	29	10	10	0	NA	179	5	0	182_1_2_19-Oct	0	0	0	1
182	1	3	bottom	NA	19	10	19-Oct	2017	18/12/2017	29	19	19	0	NA	162	5	2	182_1_3_19-Oct	10.52631579	10.52631579	0.105263158	0.263157895
182	1	3	top	NA	19	10	19-Oct	2017	18/12/2017	29	5	5	0	NA	163	5	0	182_1_3_19-Oct	0	0	0	0.4
182	1	4	bottom	NA	19	10	19-Oct	2017	18/12/2017	29	8	9	1	NA	164	5	0	182_1_4_19-Oct	0	0	0	0.375
182	1	4	top	NA	19	10	19-Oct	2017	18/12/2017	29	5	6	1	NA	165	5	1	182_1_4_19-Oct	16.66666667	20	0.2	1
182	1	5	bottom	NA	19	10	19-Oct	2017	18/12/2017	29	16	22	6	NA	166	5	0	182_1_5_19-Oct	0	0	0	0.125
182	1	5	top	NA	19	10	19-Oct	2017	18/12/2017	29	12	15	3	NA	167	5	1	182_1_5_19-Oct	6.666666667	8.333333333	0.083333333	0.25
182	1	6	bottom	NA	19	10	19-Oct	2017	18/12/2017	29	15	15	0	NA	168	5	0	182_1_6_19-Oct	0	0	0	0
182	1	6	top	NA	19	10	19-Oct	2017	18/12/2017	29	10	12	2	NA	169	5	0	182_1_6_19-Oct	0	0	0	0.2
182	1	7	bottom	NA	19	10	19-Oct	2017	18/12/2017	29	20	20	0	NA	170	5	1	182_1_7_19-Oct	5	5	0.05	0.05
182	1	7	top	NA	19	10	19-Oct	2017	18/12/2017	29	17	17	0	NA	171	5	3	182_1_7_19-Oct	17.64705882	17.64705882	0.176470588	0.647058824
182	1	8	bottom	NA	19	10	19-Oct	2017	18/12/2017	29	12	12	0	NA	172	5	1	182_1_8_19-Oct	8.333333333	8.333333333	0.083333333	0.666666667
182	1	8	top	NA	19	10	19-Oct	2017	18/12/2017	29	9	9	0	NA	173	5	0	182_1_8_19-Oct	0	0	0	1
182	1	9	bottom	NA	19	10	19-Oct	2017	18/12/2017	29	14	14	0	NA	174	5	1	182_1_9_19-Oct	7.142857143	7.142857143	0.071428571	0.142857143
182	1	9	top	NA	19	10	19-Oct	2017	18/12/2017	29	17	17	0	NA	175	5	7	182_1_9_19-Oct	41.17647059	41.17647059	0.411764706	0.647058824
182	2	1	bottom	NA	19	10	19-Oct	2017	18/12/2017	29	16	16	0	NA	180	5	6	182_2_1_19-Oct	37.5	37.5	0.375	0.6875
182	2	1	top	NA	19	10	19-Oct	2017	18/12/2017	29	13	13	0	NA	181	5	1	182_2_1_19-Oct	7.692307692	7.692307692	0.076923077	0.230769231
182	2	3	bottom	NA	19	10	19-Oct	2017	18/12/2017	29	9	9	0	NA	182	5	0	182_2_3_19-Oct	0	0	0	0.333333333
182	2	3	top	NA	19	10	19-Oct	2017	18/12/2017	29	10	10	0	NA	183	5	1	182_2_3_19-Oct	10	10	0.1	0.4
182	2	4	bottom	NA	19	10	19-Oct	2017	18/12/2017	29	13	14	1	NA	184	5	2	182_2_4_19-Oct	14.28571429	15.38461538	0.153846154	0.923076923
182	2	4	top	NA	19	10	19-Oct	2017	18/12/2017	29	14	14	0	NA	185	5	1	182_2_4_19-Oct	7.142857143	7.142857143	0.071428571	0.285714286
182	2	5	bottom	NA	19	10	19-Oct	2017	18/12/2017	29	18	18	0	NA	186	5	4	182_2_5_19-Oct	22.22222222	22.22222222	0.222222222	0.333333333
182	2	5	top	NA	19	10	19-Oct	2017	18/12/2017	29	12	13	1	NA	187	5	4	182_2_5_19-Oct	30.76923077	33.33333333	0.333333333	0.333333333
182	2	6	bottom	NA	19	10	19-Oct	2017	18/12/2017	29	11	20	9	NA	188	5	1	182_2_6_19-Oct	5	9.090909091	0.090909091	0.090909091
182	2	6	top	NA	19	10	19-Oct	2017	18/12/2017	29	16	18	2	NA	189	5	1	182_2_6_19-Oct	5.555555556	6.25	0.0625	0.1875
182	2	7	bottom	NA	19	10	19-Oct	2017	18/12/2017	29	11	21	10	NA	190	5	1	182_2_7_19-Oct	4.761904762	9.090909091	0.090909091	0.090909091
182	2	7	top	NA	19	10	19-Oct	2017	18/12/2017	29	11	14	3	NA	191	5	1	182_2_7_19-Oct	7.142857143	9.090909091	0.090909091	0.090909091
182	3	1	bottom	NA	19	10	19-Oct	2017	18/12/2017	29	9	12	3	NA	192	5	0	182_3_1_19-Oct	0	0	0	0.333333333
182	3	1	top	NA	19	10	19-Oct	2017	18/12/2017	29	7	7	0	NA	193	5	1	182_3_1_19-Oct	14.28571429	14.28571429	0.142857143	0.142857143
182	3	3	bottom	NA	19	10	19-Oct	2017	18/12/2017	29	9	13	4	NA	194	5	1	182_3_3_19-Oct	7.692307692	11.11111111	0.111111111	0.111111111
182	3	3	top	NA	19	10	19-Oct	2017	18/12/2017	29	7	7	0	NA	195	5	0	182_3_3_19-Oct	0	0	0	0.285714286
182	3	4	bottom	NA	19	10	19-Oct	2017	18/12/2017	29	5	5	0	NA	196	5	0	182_3_4_19-Oct	0	0	0	0
182	3	4	top	NA	19	10	19-Oct	2017	18/12/2017	29	13	13	0	NA	197	5	2	182_3_4_19-Oct	15.38461538	15.38461538	0.153846154	0.538461538
182	3	5	bottom	NA	19	10	19-Oct	2017	18/12/2017	29	13	13	0	NA	198	5	0	182_3_5_19-Oct	0	0	0	0.076923077
182	3	5	top	NA	19	10	19-Oct	2017	18/12/2017	29	10	10	0	NA	199	5	0	182_3_5_19-Oct	0	0	0	0.9
182	3	6	bottom	NA	19	10	19-Oct	2017	18/12/2017	29	8	9	1	NA	200	5	0	182_3_6_19-Oct	0	0	0	0
182	3	6	top	NA	19	10	19-Oct	2017	18/12/2017	29	6	7	1	NA	201	5	0	182_3_6_19-Oct	0	0	0	0
182	3	7	bottom	NA	19	10	19-Oct	2017	18/12/2017	29	22	24	2	NA	202	5	2	182_3_7_19-Oct	8.333333333	9.090909091	0.090909091	0.090909091
182	3	7	top	NA	19	10	19-Oct	2017	18/12/2017	29	14	15	1	NA	203	5	0	182_3_7_19-Oct	0	0	0	0.142857143
53	1	1	bottom	NA	19	10	19-Oct	2017	18/12/2017	29	13	16	3	NA	100	5	2	53_1_1_19-Oct	12.5	15.38461538	0.153846154	0.923076923
53	1	1	top	NA	19	10	19-Oct	2017	18/12/2017	29	12	15	3	NA	101	5	4	53_1_1_19-Oct	26.66666667	33.33333333	0.333333333	0.75
53	2	1	bottom	NA	19	10	19-Oct	2017	18/12/2017	29	19	20	1	NA	102	5	5	53_2_1_19-Oct	25	26.31578947	0.263157895	0.578947368
53	2	1	top	NA	19	10	19-Oct	2017	18/12/2017	29	19	19	0	NA	103	5	10	53_2_1_19-Oct	52.63157895	52.63157895	0.526315789	0.842105263
53	3	1	bottom	NA	19	10	19-Oct	2017	18/12/2017	29	11	14	3	NA	104	5	1	53_3_1_19-Oct	7.142857143	9.090909091	0.090909091	0.636363636
53	3	1	top	NA	19	10	19-Oct	2017	18/12/2017	29	12	13	1	NA	105	5	1	53_3_1_19-Oct	7.692307692	8.333333333	0.083333333	0.5
53	4	1	bottom	NA	19	10	19-Oct	2017	18/12/2017	29	3	19	16	NA	106	5	1	53_4_1_19-Oct	5.263157895	33.33333333	0.333333333	0.333333333
53	4	1	top	NA	19	10	19-Oct	2017	18/12/2017	29	5	12	7	NA	107	5	0	53_4_1_19-Oct	0	0	0	0
53	5	1	bottom	NA	19	10	19-Oct	2017	18/12/2017	29	21	23	2	NA	108	5	2	53_5_1_19-Oct	8.695652174	9.523809524	0.095238095	0.952380952
53	5	1	top	NA	19	10	19-Oct	2017	18/12/2017	29	17	17	0	NA	109	5	5	53_5_1_19-Oct	29.41176471	29.41176471	0.294117647	0.882352941
53	6	1	bottom	NA	19	10	19-Oct	2017	18/12/2017	29	3	10	7	NA	110	5	0	53_6_1_19-Oct	0	0	0	0
53	6	1	top	NA	19	10	19-Oct	2017	18/12/2017	29	9	11	2	NA	111	5	0	53_6_1_19-Oct	0	0	0	0.444444444
53	7	1	bottom	NA	19	10	19-Oct	2017	18/12/2017	29	18	22	4	NA	112	5	5	53_7_1_19-Oct	22.72727273	27.77777778	0.277777778	0.555555556
53	7	1	top	NA	19	10	19-Oct	2017	18/12/2017	29	17	17	0	NA	113	5	3	53_7_1_19-Oct	17.64705882	17.64705882	0.176470588	0.352941176
53	8	1	bottom	NA	19	10	19-Oct	2017	18/12/2017	29	21	22	1	NA	114	5	3	53_8_1_19-Oct	13.63636364	14.28571429	0.142857143	0.952380952
53	8	1	top	NA	19	10	19-Oct	2017	18/12/2017	29	20	20	0	NA	115	5	8	53_8_1_19-Oct	40	40	0.4	0.8
53	9	1	bottom	NA	19	10	19-Oct	2017	18/12/2017	29	10	18	8	NA	116	5	2	53_9_1_19-Oct	11.11111111	20	0.2	0.6
53	9	1	top	NA	19	10	19-Oct	2017	18/12/2017	29	11	12	1	NA	117	5	2	53_9_1_19-Oct	16.66666667	18.18181818	0.181818182	0.272727273
53	10	1	bottom	NA	19	10	19-Oct	2017	18/12/2017	29	6	22	16	NA	118	5	0	53_10_1_19-Oct	0	0	0	0
53	10	1	top	NA	19	10	19-Oct	2017	18/12/2017	29	14	14	0	NA	119	5	3	53_10_1_19-Oct	21.42857143	21.42857143	0.214285714	0.357142857
182	1	1	bottom	NA	19	10	19-Oct	2017	18/12/2017	29	15	15	0	NA	160	6	1	182_1_1_19-Oct	6.666666667	6.666666667	0.066666667	0.6
182	1	1	top	NA	19	10	19-Oct	2017	18/12/2017	29	6	6	0	NA	161	6	0	182_1_1_19-Oct	0	0	0	0.833333333
182	1	10	bottom	NA	19	10	19-Oct	2017	18/12/2017	29	9	12	3	NA	176	6	0	182_1_10_19-Oct	0	0	0	0.111111111
182	1	10	top	NA	19	10	19-Oct	2017	18/12/2017	29	6	6	0	NA	177	6	0	182_1_10_19-Oct	0	0	0	0
182	1	2	bottom	NA	19	10	19-Oct	2017	18/12/2017	29	22	22	0	NA	178	6	0	182_1_2_19-Oct	0	0	0	0.772727273
182	1	2	top	NA	19	10	19-Oct	2017	18/12/2017	29	10	10	0	NA	179	6	0	182_1_2_19-Oct	0	0	0	1
182	1	3	bottom	NA	19	10	19-Oct	2017	18/12/2017	29	19	19	0	NA	162	6	2	182_1_3_19-Oct	10.52631579	10.52631579	0.105263158	0.368421053
182	1	3	top	NA	19	10	19-Oct	2017	18/12/2017	29	5	5	0	NA	163	6	0	182_1_3_19-Oct	0	0	0	0.4
182	1	4	bottom	NA	19	10	19-Oct	2017	18/12/2017	29	8	9	1	NA	164	6	1	182_1_4_19-Oct	11.11111111	12.5	0.125	0.5
182	1	4	top	NA	19	10	19-Oct	2017	18/12/2017	29	5	6	1	NA	165	6	0	182_1_4_19-Oct	0	0	0	1
182	1	5	bottom	NA	19	10	19-Oct	2017	18/12/2017	29	16	22	6	NA	166	6	1	182_1_5_19-Oct	4.545454545	6.25	0.0625	0.1875
182	1	5	top	NA	19	10	19-Oct	2017	18/12/2017	29	12	15	3	NA	167	6	0	182_1_5_19-Oct	0	0	0	0.25
182	1	6	bottom	NA	19	10	19-Oct	2017	18/12/2017	29	15	15	0	NA	168	6	0	182_1_6_19-Oct	0	0	0	0
182	1	6	top	NA	19	10	19-Oct	2017	18/12/2017	29	10	12	2	NA	169	6	0	182_1_6_19-Oct	0	0	0	0.2
182	1	7	bottom	NA	19	10	19-Oct	2017	18/12/2017	29	20	20	0	NA	170	6	1	182_1_7_19-Oct	5	5	0.05	0.1
182	1	7	top	NA	19	10	19-Oct	2017	18/12/2017	29	17	17	0	NA	171	6	0	182_1_7_19-Oct	0	0	0	0.647058824
182	1	8	bottom	NA	19	10	19-Oct	2017	18/12/2017	29	12	12	0	NA	172	6	0	182_1_8_19-Oct	0	0	0	0.666666667
182	1	8	top	NA	19	10	19-Oct	2017	18/12/2017	29	9	9	0	NA	173	6	0	182_1_8_19-Oct	0	0	0	1
182	1	9	bottom	NA	19	10	19-Oct	2017	18/12/2017	29	14	14	0	NA	174	6	2	182_1_9_19-Oct	14.28571429	14.28571429	0.142857143	0.285714286
182	1	9	top	NA	19	10	19-Oct	2017	18/12/2017	29	17	17	0	NA	175	6	0	182_1_9_19-Oct	0	0	0	0.647058824
182	2	1	bottom	NA	19	10	19-Oct	2017	18/12/2017	29	16	16	0	NA	180	6	3	182_2_1_19-Oct	18.75	18.75	0.1875	0.875
182	2	1	top	NA	19	10	19-Oct	2017	18/12/2017	29	13	13	0	NA	181	6	0	182_2_1_19-Oct	0	0	0	0.230769231
182	2	3	bottom	NA	19	10	19-Oct	2017	18/12/2017	29	9	9	0	NA	182	6	3	182_2_3_19-Oct	33.33333333	33.33333333	0.333333333	0.666666667
182	2	3	top	NA	19	10	19-Oct	2017	18/12/2017	29	10	10	0	NA	183	6	0	182_2_3_19-Oct	0	0	0	0.4
182	2	4	bottom	NA	19	10	19-Oct	2017	18/12/2017	29	13	14	1	NA	184	6	0	182_2_4_19-Oct	0	0	0	0.923076923
182	2	4	top	NA	19	10	19-Oct	2017	18/12/2017	29	14	14	0	NA	185	6	3	182_2_4_19-Oct	21.42857143	21.42857143	0.214285714	0.5
182	2	5	bottom	NA	19	10	19-Oct	2017	18/12/2017	29	18	18	0	NA	186	6	4	182_2_5_19-Oct	22.22222222	22.22222222	0.222222222	0.555555556
182	2	5	top	NA	19	10	19-Oct	2017	18/12/2017	29	12	13	1	NA	187	6	4	182_2_5_19-Oct	30.76923077	33.33333333	0.333333333	0.666666667
182	2	6	bottom	NA	19	10	19-Oct	2017	18/12/2017	29	11	20	9	NA	188	6	0	182_2_6_19-Oct	0	0	0	0.090909091
182	2	6	top	NA	19	10	19-Oct	2017	18/12/2017	29	16	18	2	NA	189	6	0	182_2_6_19-Oct	0	0	0	0.1875
182	2	7	bottom	NA	19	10	19-Oct	2017	18/12/2017	29	11	21	10	NA	190	6	0	182_2_7_19-Oct	0	0	0	0.090909091
182	2	7	top	NA	19	10	19-Oct	2017	18/12/2017	29	11	14	3	NA	191	6	1	182_2_7_19-Oct	7.142857143	9.090909091	0.090909091	0.181818182
182	3	1	bottom	NA	19	10	19-Oct	2017	18/12/2017	29	9	12	3	NA	192	6	0	182_3_1_19-Oct	0	0	0	0.333333333
182	3	1	top	NA	19	10	19-Oct	2017	18/12/2017	29	7	7	0	NA	193	6	0	182_3_1_19-Oct	0	0	0	0.142857143
182	3	3	bottom	NA	19	10	19-Oct	2017	18/12/2017	29	9	13	4	NA	194	6	1	182_3_3_19-Oct	7.692307692	11.11111111	0.111111111	0.222222222
182	3	3	top	NA	19	10	19-Oct	2017	18/12/2017	29	7	7	0	NA	195	6	0	182_3_3_19-Oct	0	0	0	0.285714286
182	3	4	bottom	NA	19	10	19-Oct	2017	18/12/2017	29	5	5	0	NA	196	6	0	182_3_4_19-Oct	0	0	0	0
182	3	4	top	NA	19	10	19-Oct	2017	18/12/2017	29	13	13	0	NA	197	6	0	182_3_4_19-Oct	0	0	0	0.538461538
182	3	5	bottom	NA	19	10	19-Oct	2017	18/12/2017	29	13	13	0	NA	198	6	0	182_3_5_19-Oct	0	0	0	0.076923077
182	3	5	top	NA	19	10	19-Oct	2017	18/12/2017	29	10	10	0	NA	199	6	1	182_3_5_19-Oct	10	10	0.1	1
182	3	6	bottom	NA	19	10	19-Oct	2017	18/12/2017	29	8	9	1	NA	200	6	1	182_3_6_19-Oct	11.11111111	12.5	0.125	0.125
182	3	6	top	NA	19	10	19-Oct	2017	18/12/2017	29	6	7	1	NA	201	6	1	182_3_6_19-Oct	14.28571429	16.66666667	0.166666667	0.166666667
182	3	7	bottom	NA	19	10	19-Oct	2017	18/12/2017	29	22	24	2	NA	202	6	0	182_3_7_19-Oct	0	0	0	0.090909091
182	3	7	top	NA	19	10	19-Oct	2017	18/12/2017	29	14	15	1	NA	203	6	2	182_3_7_19-Oct	13.33333333	14.28571429	0.142857143	0.285714286
53	1	1	bottom	NA	19	10	19-Oct	2017	18/12/2017	29	13	16	3	NA	100	6	1	53_1_1_19-Oct	6.25	7.692307692	0.076923077	1
53	1	1	top	NA	19	10	19-Oct	2017	18/12/2017	29	12	15	3	NA	101	6	3	53_1_1_19-Oct	20	25	0.25	1
53	2	1	bottom	NA	19	10	19-Oct	2017	18/12/2017	29	19	20	1	NA	102	6	6	53_2_1_19-Oct	30	31.57894737	0.315789474	0.894736842
53	2	1	top	NA	19	10	19-Oct	2017	18/12/2017	29	19	19	0	NA	103	6	2	53_2_1_19-Oct	10.52631579	10.52631579	0.105263158	0.947368421
53	3	1	bottom	NA	19	10	19-Oct	2017	18/12/2017	29	11	14	3	NA	104	6	0	53_3_1_19-Oct	0	0	0	0.636363636
53	3	1	top	NA	19	10	19-Oct	2017	18/12/2017	29	12	13	1	NA	105	6	1	53_3_1_19-Oct	7.692307692	8.333333333	0.083333333	0.583333333
53	4	1	bottom	NA	19	10	19-Oct	2017	18/12/2017	29	3	19	16	NA	106	6	1	53_4_1_19-Oct	5.263157895	33.33333333	0.333333333	0.666666667
53	4	1	top	NA	19	10	19-Oct	2017	18/12/2017	29	5	12	7	NA	107	6	0	53_4_1_19-Oct	0	0	0	0
53	5	1	bottom	NA	19	10	19-Oct	2017	18/12/2017	29	21	23	2	NA	108	6	1	53_5_1_19-Oct	4.347826087	4.761904762	0.047619048	1
53	5	1	top	NA	19	10	19-Oct	2017	18/12/2017	29	17	17	0	NA	109	6	2	53_5_1_19-Oct	11.76470588	11.76470588	0.117647059	1
53	6	1	bottom	NA	19	10	19-Oct	2017	18/12/2017	29	3	10	7	NA	110	6	0	53_6_1_19-Oct	0	0	0	0
53	6	1	top	NA	19	10	19-Oct	2017	18/12/2017	29	9	11	2	NA	111	6	1	53_6_1_19-Oct	9.090909091	11.11111111	0.111111111	0.555555556
53	7	1	bottom	NA	19	10	19-Oct	2017	18/12/2017	29	18	22	4	NA	112	6	3	53_7_1_19-Oct	13.63636364	16.66666667	0.166666667	0.722222222
53	7	1	top	NA	19	10	19-Oct	2017	18/12/2017	29	17	17	0	NA	113	6	5	53_7_1_19-Oct	29.41176471	29.41176471	0.294117647	0.647058824
53	8	1	bottom	NA	19	10	19-Oct	2017	18/12/2017	29	21	22	1	NA	114	6	1	53_8_1_19-Oct	4.545454545	4.761904762	0.047619048	1
53	8	1	top	NA	19	10	19-Oct	2017	18/12/2017	29	20	20	0	NA	115	6	1	53_8_1_19-Oct	5	5	0.05	0.85
53	9	1	bottom	NA	19	10	19-Oct	2017	18/12/2017	29	10	18	8	NA	116	6	1	53_9_1_19-Oct	5.555555556	10	0.1	0.7
53	9	1	top	NA	19	10	19-Oct	2017	18/12/2017	29	11	12	1	NA	117	6	2	53_9_1_19-Oct	16.66666667	18.18181818	0.181818182	0.454545455
53	10	1	bottom	NA	19	10	19-Oct	2017	18/12/2017	29	6	22	16	NA	118	6	2	53_10_1_19-Oct	9.090909091	33.33333333	0.333333333	0.333333333
53	10	1	top	NA	19	10	19-Oct	2017	18/12/2017	29	14	14	0	NA	119	6	3	53_10_1_19-Oct	21.42857143	21.42857143	0.214285714	0.571428571
182	1	1	bottom	NA	19	10	19-Oct	2017	18/12/2017	29	15	15	0	NA	160	7	0	182_1_1_19-Oct	0	0	0	0.6
182	1	1	top	NA	19	10	19-Oct	2017	18/12/2017	29	6	6	0	NA	161	7	0	182_1_1_19-Oct	0	0	0	0.833333333
182	1	10	bottom	NA	19	10	19-Oct	2017	18/12/2017	29	9	12	3	NA	176	7	1	182_1_10_19-Oct	8.333333333	11.11111111	0.111111111	0.222222222
182	1	10	top	NA	19	10	19-Oct	2017	18/12/2017	29	6	6	0	NA	177	7	1	182_1_10_19-Oct	16.66666667	16.66666667	0.166666667	0.166666667
182	1	2	bottom	NA	19	10	19-Oct	2017	18/12/2017	29	22	22	0	NA	178	7	0	182_1_2_19-Oct	0	0	0	0.772727273
182	1	2	top	NA	19	10	19-Oct	2017	18/12/2017	29	10	10	0	NA	179	7	0	182_1_2_19-Oct	0	0	0	1
182	1	3	bottom	NA	19	10	19-Oct	2017	18/12/2017	29	19	19	0	NA	162	7	3	182_1_3_19-Oct	15.78947368	15.78947368	0.157894737	0.526315789
182	1	3	top	NA	19	10	19-Oct	2017	18/12/2017	29	5	5	0	NA	163	7	0	182_1_3_19-Oct	0	0	0	0.4
182	1	4	bottom	NA	19	10	19-Oct	2017	18/12/2017	29	8	9	1	NA	164	7	0	182_1_4_19-Oct	0	0	0	0.5
182	1	4	top	NA	19	10	19-Oct	2017	18/12/2017	29	5	6	1	NA	165	7	0	182_1_4_19-Oct	0	0	0	1
182	1	5	bottom	NA	19	10	19-Oct	2017	18/12/2017	29	16	22	6	NA	166	7	0	182_1_5_19-Oct	0	0	0	0.1875
182	1	5	top	NA	19	10	19-Oct	2017	18/12/2017	29	12	15	3	NA	167	7	2	182_1_5_19-Oct	13.33333333	16.66666667	0.166666667	0.416666667
182	1	6	bottom	NA	19	10	19-Oct	2017	18/12/2017	29	15	15	0	NA	168	7	2	182_1_6_19-Oct	13.33333333	13.33333333	0.133333333	0.133333333
182	1	6	top	NA	19	10	19-Oct	2017	18/12/2017	29	10	12	2	NA	169	7	0	182_1_6_19-Oct	0	0	0	0.2
182	1	7	bottom	NA	19	10	19-Oct	2017	18/12/2017	29	20	20	0	NA	170	7	3	182_1_7_19-Oct	15	15	0.15	0.25
182	1	7	top	NA	19	10	19-Oct	2017	18/12/2017	29	17	17	0	NA	171	7	0	182_1_7_19-Oct	0	0	0	0.647058824
182	1	8	bottom	NA	19	10	19-Oct	2017	18/12/2017	29	12	12	0	NA	172	7	1	182_1_8_19-Oct	8.333333333	8.333333333	0.083333333	0.75
182	1	8	top	NA	19	10	19-Oct	2017	18/12/2017	29	9	9	0	NA	173	7	0	182_1_8_19-Oct	0	0	0	1
182	1	9	bottom	NA	19	10	19-Oct	2017	18/12/2017	29	14	14	0	NA	174	7	1	182_1_9_19-Oct	7.142857143	7.142857143	0.071428571	0.357142857
182	1	9	top	NA	19	10	19-Oct	2017	18/12/2017	29	17	17	0	NA	175	7	3	182_1_9_19-Oct	17.64705882	17.64705882	0.176470588	0.823529412
182	2	1	bottom	NA	19	10	19-Oct	2017	18/12/2017	29	16	16	0	NA	180	7	0	182_2_1_19-Oct	0	0	0	0.875
182	2	1	top	NA	19	10	19-Oct	2017	18/12/2017	29	13	13	0	NA	181	7	2	182_2_1_19-Oct	15.38461538	15.38461538	0.153846154	0.384615385
182	2	3	bottom	NA	19	10	19-Oct	2017	18/12/2017	29	9	9	0	NA	182	7	0	182_2_3_19-Oct	0	0	0	0.666666667
182	2	3	top	NA	19	10	19-Oct	2017	18/12/2017	29	10	10	0	NA	183	7	3	182_2_3_19-Oct	30	30	0.3	0.7
182	2	4	bottom	NA	19	10	19-Oct	2017	18/12/2017	29	13	14	1	NA	184	7	0	182_2_4_19-Oct	0	0	0	0.923076923
182	2	4	top	NA	19	10	19-Oct	2017	18/12/2017	29	14	14	0	NA	185	7	2	182_2_4_19-Oct	14.28571429	14.28571429	0.142857143	0.642857143
182	2	5	bottom	NA	19	10	19-Oct	2017	18/12/2017	29	18	18	0	NA	186	7	4	182_2_5_19-Oct	22.22222222	22.22222222	0.222222222	0.777777778
182	2	5	top	NA	19	10	19-Oct	2017	18/12/2017	29	12	13	1	NA	187	7	0	182_2_5_19-Oct	0	0	0	0.666666667
182	2	6	bottom	NA	19	10	19-Oct	2017	18/12/2017	29	11	20	9	NA	188	7	1	182_2_6_19-Oct	5	9.090909091	0.090909091	0.181818182
182	2	6	top	NA	19	10	19-Oct	2017	18/12/2017	29	16	18	2	NA	189	7	1	182_2_6_19-Oct	5.555555556	6.25	0.0625	0.25
182	2	7	bottom	NA	19	10	19-Oct	2017	18/12/2017	29	11	21	10	NA	190	7	2	182_2_7_19-Oct	9.523809524	18.18181818	0.181818182	0.272727273
182	2	7	top	NA	19	10	19-Oct	2017	18/12/2017	29	11	14	3	NA	191	7	1	182_2_7_19-Oct	7.142857143	9.090909091	0.090909091	0.272727273
182	3	1	bottom	NA	19	10	19-Oct	2017	18/12/2017	29	9	12	3	NA	192	7	0	182_3_1_19-Oct	0	0	0	0.333333333
182	3	1	top	NA	19	10	19-Oct	2017	18/12/2017	29	7	7	0	NA	193	7	2	182_3_1_19-Oct	28.57142857	28.57142857	0.285714286	0.428571429
182	3	3	bottom	NA	19	10	19-Oct	2017	18/12/2017	29	9	13	4	NA	194	7	1	182_3_3_19-Oct	7.692307692	11.11111111	0.111111111	0.333333333
182	3	3	top	NA	19	10	19-Oct	2017	18/12/2017	29	7	7	0	NA	195	7	0	182_3_3_19-Oct	0	0	0	0.285714286
182	3	4	bottom	NA	19	10	19-Oct	2017	18/12/2017	29	5	5	0	NA	196	7	0	182_3_4_19-Oct	0	0	0	0
182	3	4	top	NA	19	10	19-Oct	2017	18/12/2017	29	13	13	0	NA	197	7	1	182_3_4_19-Oct	7.692307692	7.692307692	0.076923077	0.615384615
182	3	5	bottom	NA	19	10	19-Oct	2017	18/12/2017	29	13	13	0	NA	198	7	0	182_3_5_19-Oct	0	0	0	0.076923077
182	3	5	top	NA	19	10	19-Oct	2017	18/12/2017	29	10	10	0	NA	199	7	0	182_3_5_19-Oct	0	0	0	1
182	3	6	bottom	NA	19	10	19-Oct	2017	18/12/2017	29	8	9	1	NA	200	7	0	182_3_6_19-Oct	0	0	0	0.125
182	3	6	top	NA	19	10	19-Oct	2017	18/12/2017	29	6	7	1	NA	201	7	0	182_3_6_19-Oct	0	0	0	0.166666667
182	3	7	bottom	NA	19	10	19-Oct	2017	18/12/2017	29	22	24	2	NA	202	7	0	182_3_7_19-Oct	0	0	0	0.090909091
182	3	7	top	NA	19	10	19-Oct	2017	18/12/2017	29	14	15	1	NA	203	7	1	182_3_7_19-Oct	6.666666667	7.142857143	0.071428571	0.357142857
53	1	1	bottom	NA	19	10	19-Oct	2017	18/12/2017	29	13	16	3	NA	100	7	0	53_1_1_19-Oct	0	0	0	1
53	1	1	top	NA	19	10	19-Oct	2017	18/12/2017	29	12	15	3	NA	101	7	0	53_1_1_19-Oct	0	0	0	1
53	2	1	bottom	NA	19	10	19-Oct	2017	18/12/2017	29	19	20	1	NA	102	7	2	53_2_1_19-Oct	10	10.52631579	0.105263158	1
53	2	1	top	NA	19	10	19-Oct	2017	18/12/2017	29	19	19	0	NA	103	7	1	53_2_1_19-Oct	5.263157895	5.263157895	0.052631579	1
53	3	1	bottom	NA	19	10	19-Oct	2017	18/12/2017	29	11	14	3	NA	104	7	1	53_3_1_19-Oct	7.142857143	9.090909091	0.090909091	0.727272727
53	3	1	top	NA	19	10	19-Oct	2017	18/12/2017	29	12	13	1	NA	105	7	0	53_3_1_19-Oct	0	0	0	0.583333333
53	4	1	bottom	NA	19	10	19-Oct	2017	18/12/2017	29	3	19	16	NA	106	7	1	53_4_1_19-Oct	5.263157895	33.33333333	0.333333333	1
53	4	1	top	NA	19	10	19-Oct	2017	18/12/2017	29	5	12	7	NA	107	7	1	53_4_1_19-Oct	8.333333333	20	0.2	0.2
53	5	1	bottom	NA	19	10	19-Oct	2017	18/12/2017	29	21	23	2	NA	108	7	0	53_5_1_19-Oct	0	0	0	1
53	5	1	top	NA	19	10	19-Oct	2017	18/12/2017	29	17	17	0	NA	109	7	0	53_5_1_19-Oct	0	0	0	1
53	6	1	bottom	NA	19	10	19-Oct	2017	18/12/2017	29	3	10	7	NA	110	7	2	53_6_1_19-Oct	20	66.66666667	0.666666667	0.666666667
53	6	1	top	NA	19	10	19-Oct	2017	18/12/2017	29	9	11	2	NA	111	7	2	53_6_1_19-Oct	18.18181818	22.22222222	0.222222222	0.777777778
53	7	1	bottom	NA	19	10	19-Oct	2017	18/12/2017	29	18	22	4	NA	112	7	2	53_7_1_19-Oct	9.090909091	11.11111111	0.111111111	0.833333333
53	7	1	top	NA	19	10	19-Oct	2017	18/12/2017	29	17	17	0	NA	113	7	4	53_7_1_19-Oct	23.52941176	23.52941176	0.235294118	0.882352941
53	8	1	bottom	NA	19	10	19-Oct	2017	18/12/2017	29	21	22	1	NA	114	7	0	53_8_1_19-Oct	0	0	0	1
53	8	1	top	NA	19	10	19-Oct	2017	18/12/2017	29	20	20	0	NA	115	7	2	53_8_1_19-Oct	10	10	0.1	0.95
53	9	1	bottom	NA	19	10	19-Oct	2017	18/12/2017	29	10	18	8	NA	116	7	1	53_9_1_19-Oct	5.555555556	10	0.1	0.8
53	9	1	top	NA	19	10	19-Oct	2017	18/12/2017	29	11	12	1	NA	117	7	1	53_9_1_19-Oct	8.333333333	9.090909091	0.090909091	0.545454545
53	10	1	bottom	NA	19	10	19-Oct	2017	18/12/2017	29	6	22	16	NA	118	7	0	53_10_1_19-Oct	0	0	0	0.333333333
53	10	1	top	NA	19	10	19-Oct	2017	18/12/2017	29	14	14	0	NA	119	7	3	53_10_1_19-Oct	21.42857143	21.42857143	0.214285714	0.785714286
182	1	1	bottom	NA	19	10	19-Oct	2017	18/12/2017	29	15	15	0	NA	160	8	0	182_1_1_19-Oct	0	0	0	0.6
182	1	1	top	NA	19	10	19-Oct	2017	18/12/2017	29	6	6	0	NA	161	8	0	182_1_1_19-Oct	0	0	0	0.833333333
182	1	10	bottom	NA	19	10	19-Oct	2017	18/12/2017	29	9	12	3	NA	176	8	1	182_1_10_19-Oct	8.333333333	11.11111111	0.111111111	0.333333333
182	1	10	top	NA	19	10	19-Oct	2017	18/12/2017	29	6	6	0	NA	177	8	2	182_1_10_19-Oct	33.33333333	33.33333333	0.333333333	0.5
182	1	2	bottom	NA	19	10	19-Oct	2017	18/12/2017	29	22	22	0	NA	178	8	0	182_1_2_19-Oct	0	0	0	0.772727273
182	1	2	top	NA	19	10	19-Oct	2017	18/12/2017	29	10	10	0	NA	179	8	0	182_1_2_19-Oct	0	0	0	1
182	1	3	bottom	NA	19	10	19-Oct	2017	18/12/2017	29	19	19	0	NA	162	8	0	182_1_3_19-Oct	0	0	0	0.526315789
182	1	3	top	NA	19	10	19-Oct	2017	18/12/2017	29	5	5	0	NA	163	8	0	182_1_3_19-Oct	0	0	0	0.4
182	1	4	bottom	NA	19	10	19-Oct	2017	18/12/2017	29	8	9	1	NA	164	8	1	182_1_4_19-Oct	11.11111111	12.5	0.125	0.625
182	1	4	top	NA	19	10	19-Oct	2017	18/12/2017	29	5	6	1	NA	165	8	0	182_1_4_19-Oct	0	0	0	1
182	1	5	bottom	NA	19	10	19-Oct	2017	18/12/2017	29	16	22	6	NA	166	8	0	182_1_5_19-Oct	0	0	0	0.1875
182	1	5	top	NA	19	10	19-Oct	2017	18/12/2017	29	12	15	3	NA	167	8	0	182_1_5_19-Oct	0	0	0	0.416666667
182	1	6	bottom	NA	19	10	19-Oct	2017	18/12/2017	29	15	15	0	NA	168	8	0	182_1_6_19-Oct	0	0	0	0.133333333
182	1	6	top	NA	19	10	19-Oct	2017	18/12/2017	29	10	12	2	NA	169	8	0	182_1_6_19-Oct	0	0	0	0.2
182	1	7	bottom	NA	19	10	19-Oct	2017	18/12/2017	29	20	20	0	NA	170	8	1	182_1_7_19-Oct	5	5	0.05	0.3
182	1	7	top	NA	19	10	19-Oct	2017	18/12/2017	29	17	17	0	NA	171	8	0	182_1_7_19-Oct	0	0	0	0.647058824
182	1	8	bottom	NA	19	10	19-Oct	2017	18/12/2017	29	12	12	0	NA	172	8	0	182_1_8_19-Oct	0	0	0	0.75
182	1	8	top	NA	19	10	19-Oct	2017	18/12/2017	29	9	9	0	NA	173	8	0	182_1_8_19-Oct	0	0	0	1
182	1	9	bottom	NA	19	10	19-Oct	2017	18/12/2017	29	14	14	0	NA	174	8	1	182_1_9_19-Oct	7.142857143	7.142857143	0.071428571	0.428571429
182	1	9	top	NA	19	10	19-Oct	2017	18/12/2017	29	17	17	0	NA	175	8	2	182_1_9_19-Oct	11.76470588	11.76470588	0.117647059	0.941176471
182	2	1	bottom	NA	19	10	19-Oct	2017	18/12/2017	29	16	16	0	NA	180	8	0	182_2_1_19-Oct	0	0	0	0.875
182	2	1	top	NA	19	10	19-Oct	2017	18/12/2017	29	13	13	0	NA	181	8	6	182_2_1_19-Oct	46.15384615	46.15384615	0.461538462	0.846153846
182	2	3	bottom	NA	19	10	19-Oct	2017	18/12/2017	29	9	9	0	NA	182	8	2	182_2_3_19-Oct	22.22222222	22.22222222	0.222222222	0.888888889
182	2	3	top	NA	19	10	19-Oct	2017	18/12/2017	29	10	10	0	NA	183	8	3	182_2_3_19-Oct	30	30	0.3	1
182	2	4	bottom	NA	19	10	19-Oct	2017	18/12/2017	29	13	14	1	NA	184	8	1	182_2_4_19-Oct	7.142857143	7.692307692	0.076923077	1
182	2	4	top	NA	19	10	19-Oct	2017	18/12/2017	29	14	14	0	NA	185	8	1	182_2_4_19-Oct	7.142857143	7.142857143	0.071428571	0.714285714
182	2	5	bottom	NA	19	10	19-Oct	2017	18/12/2017	29	18	18	0	NA	186	8	1	182_2_5_19-Oct	5.555555556	5.555555556	0.055555556	0.833333333
182	2	5	top	NA	19	10	19-Oct	2017	18/12/2017	29	12	13	1	NA	187	8	1	182_2_5_19-Oct	7.692307692	8.333333333	0.083333333	0.75
182	2	6	bottom	NA	19	10	19-Oct	2017	18/12/2017	29	11	20	9	NA	188	8	0	182_2_6_19-Oct	0	0	0	0.181818182
182	2	6	top	NA	19	10	19-Oct	2017	18/12/2017	29	16	18	2	NA	189	8	0	182_2_6_19-Oct	0	0	0	0.25
182	2	7	bottom	NA	19	10	19-Oct	2017	18/12/2017	29	11	21	10	NA	190	8	0	182_2_7_19-Oct	0	0	0	0.272727273
182	2	7	top	NA	19	10	19-Oct	2017	18/12/2017	29	11	14	3	NA	191	8	0	182_2_7_19-Oct	0	0	0	0.272727273
182	3	1	bottom	NA	19	10	19-Oct	2017	18/12/2017	29	9	12	3	NA	192	8	0	182_3_1_19-Oct	0	0	0	0.333333333
182	3	1	top	NA	19	10	19-Oct	2017	18/12/2017	29	7	7	0	NA	193	8	1	182_3_1_19-Oct	14.28571429	14.28571429	0.142857143	0.571428571
182	3	3	bottom	NA	19	10	19-Oct	2017	18/12/2017	29	9	13	4	NA	194	8	3	182_3_3_19-Oct	23.07692308	33.33333333	0.333333333	0.666666667
182	3	3	top	NA	19	10	19-Oct	2017	18/12/2017	29	7	7	0	NA	195	8	0	182_3_3_19-Oct	0	0	0	0.285714286
182	3	4	bottom	NA	19	10	19-Oct	2017	18/12/2017	29	5	5	0	NA	196	8	0	182_3_4_19-Oct	0	0	0	0
182	3	4	top	NA	19	10	19-Oct	2017	18/12/2017	29	13	13	0	NA	197	8	0	182_3_4_19-Oct	0	0	0	0.615384615
182	3	5	bottom	NA	19	10	19-Oct	2017	18/12/2017	29	13	13	0	NA	198	8	0	182_3_5_19-Oct	0	0	0	0.076923077
182	3	5	top	NA	19	10	19-Oct	2017	18/12/2017	29	10	10	0	NA	199	8	0	182_3_5_19-Oct	0	0	0	1
182	3	6	bottom	NA	19	10	19-Oct	2017	18/12/2017	29	8	9	1	NA	200	8	0	182_3_6_19-Oct	0	0	0	0.125
182	3	6	top	NA	19	10	19-Oct	2017	18/12/2017	29	6	7	1	NA	201	8	0	182_3_6_19-Oct	0	0	0	0.166666667
182	3	7	bottom	NA	19	10	19-Oct	2017	18/12/2017	29	22	24	2	NA	202	8	0	182_3_7_19-Oct	0	0	0	0.090909091
182	3	7	top	NA	19	10	19-Oct	2017	18/12/2017	29	14	15	1	NA	203	8	1	182_3_7_19-Oct	6.666666667	7.142857143	0.071428571	0.428571429
53	1	1	bottom	NA	19	10	19-Oct	2017	18/12/2017	29	13	16	3	NA	100	8	0	53_1_1_19-Oct	0	0	0	1
53	1	1	top	NA	19	10	19-Oct	2017	18/12/2017	29	12	15	3	NA	101	8	0	53_1_1_19-Oct	0	0	0	1
53	2	1	bottom	NA	19	10	19-Oct	2017	18/12/2017	29	19	20	1	NA	102	8	0	53_2_1_19-Oct	0	0	0	1
53	2	1	top	NA	19	10	19-Oct	2017	18/12/2017	29	19	19	0	NA	103	8	0	53_2_1_19-Oct	0	0	0	1
53	3	1	bottom	NA	19	10	19-Oct	2017	18/12/2017	29	11	14	3	NA	104	8	0	53_3_1_19-Oct	0	0	0	0.727272727
53	3	1	top	NA	19	10	19-Oct	2017	18/12/2017	29	12	13	1	NA	105	8	0	53_3_1_19-Oct	0	0	0	0.583333333
53	4	1	bottom	NA	19	10	19-Oct	2017	18/12/2017	29	3	19	16	NA	106	8	0	53_4_1_19-Oct	0	0	0	1
53	4	1	top	NA	19	10	19-Oct	2017	18/12/2017	29	5	12	7	NA	107	8	0	53_4_1_19-Oct	0	0	0	0.2
53	5	1	bottom	NA	19	10	19-Oct	2017	18/12/2017	29	21	23	2	NA	108	8	0	53_5_1_19-Oct	0	0	0	1
53	5	1	top	NA	19	10	19-Oct	2017	18/12/2017	29	17	17	0	NA	109	8	0	53_5_1_19-Oct	0	0	0	1
53	6	1	bottom	NA	19	10	19-Oct	2017	18/12/2017	29	3	10	7	NA	110	8	0	53_6_1_19-Oct	0	0	0	0.666666667
53	6	1	top	NA	19	10	19-Oct	2017	18/12/2017	29	9	11	2	NA	111	8	2	53_6_1_19-Oct	18.18181818	22.22222222	0.222222222	1
53	7	1	bottom	NA	19	10	19-Oct	2017	18/12/2017	29	18	22	4	NA	112	8	0	53_7_1_19-Oct	0	0	0	0.833333333
53	7	1	top	NA	19	10	19-Oct	2017	18/12/2017	29	17	17	0	NA	113	8	1	53_7_1_19-Oct	5.882352941	5.882352941	0.058823529	0.941176471
53	8	1	bottom	NA	19	10	19-Oct	2017	18/12/2017	29	21	22	1	NA	114	8	0	53_8_1_19-Oct	0	0	0	1
53	8	1	top	NA	19	10	19-Oct	2017	18/12/2017	29	20	20	0	NA	115	8	1	53_8_1_19-Oct	5	5	0.05	1
53	9	1	bottom	NA	19	10	19-Oct	2017	18/12/2017	29	10	18	8	NA	116	8	0	53_9_1_19-Oct	0	0	0	0.8
53	9	1	top	NA	19	10	19-Oct	2017	18/12/2017	29	11	12	1	NA	117	8	1	53_9_1_19-Oct	8.333333333	9.090909091	0.090909091	0.636363636
53	10	1	bottom	NA	19	10	19-Oct	2017	18/12/2017	29	6	22	16	NA	118	8	1	53_10_1_19-Oct	4.545454545	16.66666667	0.166666667	0.5
53	10	1	top	NA	19	10	19-Oct	2017	18/12/2017	29	14	14	0	NA	119	8	2	53_10_1_19-Oct	14.28571429	14.28571429	0.142857143	0.928571429
182	1	1	bottom	NA	19	10	19-Oct	2017	18/12/2017	29	15	15	0	NA	160	9	0	182_1_1_19-Oct	0	0	0	0.6
182	1	1	top	NA	19	10	19-Oct	2017	18/12/2017	29	6	6	0	NA	161	9	0	182_1_1_19-Oct	0	0	0	0.833333333
182	1	10	bottom	NA	19	10	19-Oct	2017	18/12/2017	29	9	12	3	NA	176	9	0	182_1_10_19-Oct	0	0	0	0.333333333
182	1	10	top	NA	19	10	19-Oct	2017	18/12/2017	29	6	6	0	NA	177	9	0	182_1_10_19-Oct	0	0	0	0.5
182	1	2	bottom	NA	19	10	19-Oct	2017	18/12/2017	29	22	22	0	NA	178	9	0	182_1_2_19-Oct	0	0	0	0.772727273
182	1	2	top	NA	19	10	19-Oct	2017	18/12/2017	29	10	10	0	NA	179	9	0	182_1_2_19-Oct	0	0	0	1
182	1	3	bottom	NA	19	10	19-Oct	2017	18/12/2017	29	19	19	0	NA	162	9	0	182_1_3_19-Oct	0	0	0	0.526315789
182	1	3	top	NA	19	10	19-Oct	2017	18/12/2017	29	5	5	0	NA	163	9	0	182_1_3_19-Oct	0	0	0	0.4
182	1	4	bottom	NA	19	10	19-Oct	2017	18/12/2017	29	8	9	1	NA	164	9	0	182_1_4_19-Oct	0	0	0	0.625
182	1	4	top	NA	19	10	19-Oct	2017	18/12/2017	29	5	6	1	NA	165	9	0	182_1_4_19-Oct	0	0	0	1
182	1	5	bottom	NA	19	10	19-Oct	2017	18/12/2017	29	16	22	6	NA	166	9	0	182_1_5_19-Oct	0	0	0	0.1875
182	1	5	top	NA	19	10	19-Oct	2017	18/12/2017	29	12	15	3	NA	167	9	0	182_1_5_19-Oct	0	0	0	0.416666667
182	1	6	bottom	NA	19	10	19-Oct	2017	18/12/2017	29	15	15	0	NA	168	9	0	182_1_6_19-Oct	0	0	0	0.133333333
182	1	6	top	NA	19	10	19-Oct	2017	18/12/2017	29	10	12	2	NA	169	9	0	182_1_6_19-Oct	0	0	0	0.2
182	1	7	bottom	NA	19	10	19-Oct	2017	18/12/2017	29	20	20	0	NA	170	9	0	182_1_7_19-Oct	0	0	0	0.3
182	1	7	top	NA	19	10	19-Oct	2017	18/12/2017	29	17	17	0	NA	171	9	0	182_1_7_19-Oct	0	0	0	0.647058824
182	1	8	bottom	NA	19	10	19-Oct	2017	18/12/2017	29	12	12	0	NA	172	9	0	182_1_8_19-Oct	0	0	0	0.75
182	1	8	top	NA	19	10	19-Oct	2017	18/12/2017	29	9	9	0	NA	173	9	0	182_1_8_19-Oct	0	0	0	1
182	1	9	bottom	NA	19	10	19-Oct	2017	18/12/2017	29	14	14	0	NA	174	9	0	182_1_9_19-Oct	0	0	0	0.428571429
182	1	9	top	NA	19	10	19-Oct	2017	18/12/2017	29	17	17	0	NA	175	9	0	182_1_9_19-Oct	0	0	0	0.941176471
182	2	1	bottom	NA	19	10	19-Oct	2017	18/12/2017	29	16	16	0	NA	180	9	0	182_2_1_19-Oct	0	0	0	0.875
182	2	1	top	NA	19	10	19-Oct	2017	18/12/2017	29	13	13	0	NA	181	9	0	182_2_1_19-Oct	0	0	0	0.846153846
182	2	3	bottom	NA	19	10	19-Oct	2017	18/12/2017	29	9	9	0	NA	182	9	0	182_2_3_19-Oct	0	0	0	0.888888889
182	2	3	top	NA	19	10	19-Oct	2017	18/12/2017	29	10	10	0	NA	183	9	0	182_2_3_19-Oct	0	0	0	1
182	2	4	bottom	NA	19	10	19-Oct	2017	18/12/2017	29	13	14	1	NA	184	9	0	182_2_4_19-Oct	0	0	0	1
182	2	4	top	NA	19	10	19-Oct	2017	18/12/2017	29	14	14	0	NA	185	9	0	182_2_4_19-Oct	0	0	0	0.714285714
182	2	5	bottom	NA	19	10	19-Oct	2017	18/12/2017	29	18	18	0	NA	186	9	0	182_2_5_19-Oct	0	0	0	0.833333333
182	2	5	top	NA	19	10	19-Oct	2017	18/12/2017	29	12	13	1	NA	187	9	0	182_2_5_19-Oct	0	0	0	0.75
182	2	6	bottom	NA	19	10	19-Oct	2017	18/12/2017	29	11	20	9	NA	188	9	0	182_2_6_19-Oct	0	0	0	0.181818182
182	2	6	top	NA	19	10	19-Oct	2017	18/12/2017	29	16	18	2	NA	189	9	0	182_2_6_19-Oct	0	0	0	0.25
182	2	7	bottom	NA	19	10	19-Oct	2017	18/12/2017	29	11	21	10	NA	190	9	0	182_2_7_19-Oct	0	0	0	0.272727273
182	2	7	top	NA	19	10	19-Oct	2017	18/12/2017	29	11	14	3	NA	191	9	0	182_2_7_19-Oct	0	0	0	0.272727273
182	3	1	bottom	NA	19	10	19-Oct	2017	18/12/2017	29	9	12	3	NA	192	9	0	182_3_1_19-Oct	0	0	0	0.333333333
182	3	1	top	NA	19	10	19-Oct	2017	18/12/2017	29	7	7	0	NA	193	9	0	182_3_1_19-Oct	0	0	0	0.571428571
182	3	3	bottom	NA	19	10	19-Oct	2017	18/12/2017	29	9	13	4	NA	194	9	0	182_3_3_19-Oct	0	0	0	0.666666667
182	3	3	top	NA	19	10	19-Oct	2017	18/12/2017	29	7	7	0	NA	195	9	0	182_3_3_19-Oct	0	0	0	0.285714286
182	3	4	bottom	NA	19	10	19-Oct	2017	18/12/2017	29	5	5	0	NA	196	9	0	182_3_4_19-Oct	0	0	0	0
182	3	4	top	NA	19	10	19-Oct	2017	18/12/2017	29	13	13	0	NA	197	9	0	182_3_4_19-Oct	0	0	0	0.615384615
182	3	5	bottom	NA	19	10	19-Oct	2017	18/12/2017	29	13	13	0	NA	198	9	0	182_3_5_19-Oct	0	0	0	0.076923077
182	3	5	top	NA	19	10	19-Oct	2017	18/12/2017	29	10	10	0	NA	199	9	0	182_3_5_19-Oct	0	0	0	1
182	3	6	bottom	NA	19	10	19-Oct	2017	18/12/2017	29	8	9	1	NA	200	9	0	182_3_6_19-Oct	0	0	0	0.125
182	3	6	top	NA	19	10	19-Oct	2017	18/12/2017	29	6	7	1	NA	201	9	0	182_3_6_19-Oct	0	0	0	0.166666667
182	3	7	bottom	NA	19	10	19-Oct	2017	18/12/2017	29	22	24	2	NA	202	9	0	182_3_7_19-Oct	0	0	0	0.090909091
182	3	7	top	NA	19	10	19-Oct	2017	18/12/2017	29	14	15	1	NA	203	9	0	182_3_7_19-Oct	0	0	0	0.428571429
53	1	1	bottom	NA	19	10	19-Oct	2017	18/12/2017	29	13	16	3	NA	100	9	0	53_1_1_19-Oct	0	0	0	1
53	1	1	top	NA	19	10	19-Oct	2017	18/12/2017	29	12	15	3	NA	101	9	0	53_1_1_19-Oct	0	0	0	1
53	2	1	bottom	NA	19	10	19-Oct	2017	18/12/2017	29	19	20	1	NA	102	9	0	53_2_1_19-Oct	0	0	0	1
53	2	1	top	NA	19	10	19-Oct	2017	18/12/2017	29	19	19	0	NA	103	9	0	53_2_1_19-Oct	0	0	0	1
53	3	1	bottom	NA	19	10	19-Oct	2017	18/12/2017	29	11	14	3	NA	104	9	0	53_3_1_19-Oct	0	0	0	0.727272727
53	3	1	top	NA	19	10	19-Oct	2017	18/12/2017	29	12	13	1	NA	105	9	0	53_3_1_19-Oct	0	0	0	0.583333333
53	4	1	bottom	NA	19	10	19-Oct	2017	18/12/2017	29	3	19	16	NA	106	9	0	53_4_1_19-Oct	0	0	0	1
53	4	1	top	NA	19	10	19-Oct	2017	18/12/2017	29	5	12	7	NA	107	9	1	53_4_1_19-Oct	8.333333333	20	0.2	0.4
53	5	1	bottom	NA	19	10	19-Oct	2017	18/12/2017	29	21	23	2	NA	108	9	0	53_5_1_19-Oct	0	0	0	1
53	5	1	top	NA	19	10	19-Oct	2017	18/12/2017	29	17	17	0	NA	109	9	0	53_5_1_19-Oct	0	0	0	1
53	6	1	bottom	NA	19	10	19-Oct	2017	18/12/2017	29	3	10	7	NA	110	9	0	53_6_1_19-Oct	0	0	0	0.666666667
53	6	1	top	NA	19	10	19-Oct	2017	18/12/2017	29	9	11	2	NA	111	9	0	53_6_1_19-Oct	0	0	0	1
53	7	1	bottom	NA	19	10	19-Oct	2017	18/12/2017	29	18	22	4	NA	112	9	0	53_7_1_19-Oct	0	0	0	0.833333333
53	7	1	top	NA	19	10	19-Oct	2017	18/12/2017	29	17	17	0	NA	113	9	0	53_7_1_19-Oct	0	0	0	0.941176471
53	8	1	bottom	NA	19	10	19-Oct	2017	18/12/2017	29	21	22	1	NA	114	9	0	53_8_1_19-Oct	0	0	0	1
53	8	1	top	NA	19	10	19-Oct	2017	18/12/2017	29	20	20	0	NA	115	9	0	53_8_1_19-Oct	0	0	0	1
53	9	1	bottom	NA	19	10	19-Oct	2017	18/12/2017	29	10	18	8	NA	116	9	0	53_9_1_19-Oct	0	0	0	0.8
53	9	1	top	NA	19	10	19-Oct	2017	18/12/2017	29	11	12	1	NA	117	9	0	53_9_1_19-Oct	0	0	0	0.636363636
53	10	1	bottom	NA	19	10	19-Oct	2017	18/12/2017	29	6	22	16	NA	118	9	0	53_10_1_19-Oct	0	0	0	0.5
53	10	1	top	NA	19	10	19-Oct	2017	18/12/2017	29	14	14	0	NA	119	9	0	53_10_1_19-Oct	0	0	0	0.928571429
182	1	1	bottom	NA	19	10	19-Oct	2017	18/12/2017	29	15	15	0	NA	160	10	0	182_1_1_19-Oct	0	0	0	0.6
182	1	1	top	NA	19	10	19-Oct	2017	18/12/2017	29	6	6	0	NA	161	10	0	182_1_1_19-Oct	0	0	0	0.833333333
182	1	10	bottom	NA	19	10	19-Oct	2017	18/12/2017	29	9	12	3	NA	176	10	0	182_1_10_19-Oct	0	0	0	0.333333333
182	1	10	top	NA	19	10	19-Oct	2017	18/12/2017	29	6	6	0	NA	177	10	0	182_1_10_19-Oct	0	0	0	0.5
182	1	2	bottom	NA	19	10	19-Oct	2017	18/12/2017	29	22	22	0	NA	178	10	0	182_1_2_19-Oct	0	0	0	0.772727273
182	1	2	top	NA	19	10	19-Oct	2017	18/12/2017	29	10	10	0	NA	179	10	0	182_1_2_19-Oct	0	0	0	1
182	1	3	bottom	NA	19	10	19-Oct	2017	18/12/2017	29	19	19	0	NA	162	10	0	182_1_3_19-Oct	0	0	0	0.526315789
182	1	3	top	NA	19	10	19-Oct	2017	18/12/2017	29	5	5	0	NA	163	10	0	182_1_3_19-Oct	0	0	0	0.4
182	1	4	bottom	NA	19	10	19-Oct	2017	18/12/2017	29	8	9	1	NA	164	10	0	182_1_4_19-Oct	0	0	0	0.625
182	1	4	top	NA	19	10	19-Oct	2017	18/12/2017	29	5	6	1	NA	165	10	0	182_1_4_19-Oct	0	0	0	1
182	1	5	bottom	NA	19	10	19-Oct	2017	18/12/2017	29	16	22	6	NA	166	10	0	182_1_5_19-Oct	0	0	0	0.1875
182	1	5	top	NA	19	10	19-Oct	2017	18/12/2017	29	12	15	3	NA	167	10	0	182_1_5_19-Oct	0	0	0	0.416666667
182	1	6	bottom	NA	19	10	19-Oct	2017	18/12/2017	29	15	15	0	NA	168	10	0	182_1_6_19-Oct	0	0	0	0.133333333
182	1	6	top	NA	19	10	19-Oct	2017	18/12/2017	29	10	12	2	NA	169	10	0	182_1_6_19-Oct	0	0	0	0.2
182	1	7	bottom	NA	19	10	19-Oct	2017	18/12/2017	29	20	20	0	NA	170	10	0	182_1_7_19-Oct	0	0	0	0.3
182	1	7	top	NA	19	10	19-Oct	2017	18/12/2017	29	17	17	0	NA	171	10	0	182_1_7_19-Oct	0	0	0	0.647058824
182	1	8	bottom	NA	19	10	19-Oct	2017	18/12/2017	29	12	12	0	NA	172	10	0	182_1_8_19-Oct	0	0	0	0.75
182	1	8	top	NA	19	10	19-Oct	2017	18/12/2017	29	9	9	0	NA	173	10	0	182_1_8_19-Oct	0	0	0	1
182	1	9	bottom	NA	19	10	19-Oct	2017	18/12/2017	29	14	14	0	NA	174	10	0	182_1_9_19-Oct	0	0	0	0.428571429
182	1	9	top	NA	19	10	19-Oct	2017	18/12/2017	29	17	17	0	NA	175	10	0	182_1_9_19-Oct	0	0	0	0.941176471
182	2	1	bottom	NA	19	10	19-Oct	2017	18/12/2017	29	16	16	0	NA	180	10	0	182_2_1_19-Oct	0	0	0	0.875
182	2	1	top	NA	19	10	19-Oct	2017	18/12/2017	29	13	13	0	NA	181	10	0	182_2_1_19-Oct	0	0	0	0.846153846
182	2	3	bottom	NA	19	10	19-Oct	2017	18/12/2017	29	9	9	0	NA	182	10	0	182_2_3_19-Oct	0	0	0	0.888888889
182	2	3	top	NA	19	10	19-Oct	2017	18/12/2017	29	10	10	0	NA	183	10	0	182_2_3_19-Oct	0	0	0	1
182	2	4	bottom	NA	19	10	19-Oct	2017	18/12/2017	29	13	14	1	NA	184	10	0	182_2_4_19-Oct	0	0	0	1
182	2	4	top	NA	19	10	19-Oct	2017	18/12/2017	29	14	14	0	NA	185	10	0	182_2_4_19-Oct	0	0	0	0.714285714
182	2	5	bottom	NA	19	10	19-Oct	2017	18/12/2017	29	18	18	0	NA	186	10	0	182_2_5_19-Oct	0	0	0	0.833333333
182	2	5	top	NA	19	10	19-Oct	2017	18/12/2017	29	12	13	1	NA	187	10	0	182_2_5_19-Oct	0	0	0	0.75
182	2	6	bottom	NA	19	10	19-Oct	2017	18/12/2017	29	11	20	9	NA	188	10	0	182_2_6_19-Oct	0	0	0	0.181818182
182	2	6	top	NA	19	10	19-Oct	2017	18/12/2017	29	16	18	2	NA	189	10	0	182_2_6_19-Oct	0	0	0	0.25
182	2	7	bottom	NA	19	10	19-Oct	2017	18/12/2017	29	11	21	10	NA	190	10	0	182_2_7_19-Oct	0	0	0	0.272727273
182	2	7	top	NA	19	10	19-Oct	2017	18/12/2017	29	11	14	3	NA	191	10	4	182_2_7_19-Oct	28.57142857	36.36363636	0.363636364	0.636363636
182	3	1	bottom	NA	19	10	19-Oct	2017	18/12/2017	29	9	12	3	NA	192	10	0	182_3_1_19-Oct	0	0	0	0.333333333
182	3	1	top	NA	19	10	19-Oct	2017	18/12/2017	29	7	7	0	NA	193	10	0	182_3_1_19-Oct	0	0	0	0.571428571
182	3	3	bottom	NA	19	10	19-Oct	2017	18/12/2017	29	9	13	4	NA	194	10	0	182_3_3_19-Oct	0	0	0	0.666666667
182	3	3	top	NA	19	10	19-Oct	2017	18/12/2017	29	7	7	0	NA	195	10	0	182_3_3_19-Oct	0	0	0	0.285714286
182	3	4	bottom	NA	19	10	19-Oct	2017	18/12/2017	29	5	5	0	NA	196	10	0	182_3_4_19-Oct	0	0	0	0
182	3	4	top	NA	19	10	19-Oct	2017	18/12/2017	29	13	13	0	NA	197	10	0	182_3_4_19-Oct	0	0	0	0.615384615
182	3	5	bottom	NA	19	10	19-Oct	2017	18/12/2017	29	13	13	0	NA	198	10	0	182_3_5_19-Oct	0	0	0	0.076923077
182	3	5	top	NA	19	10	19-Oct	2017	18/12/2017	29	10	10	0	NA	199	10	0	182_3_5_19-Oct	0	0	0	1
182	3	6	bottom	NA	19	10	19-Oct	2017	18/12/2017	29	8	9	1	NA	200	10	0	182_3_6_19-Oct	0	0	0	0.125
182	3	6	top	NA	19	10	19-Oct	2017	18/12/2017	29	6	7	1	NA	201	10	0	182_3_6_19-Oct	0	0	0	0.166666667
182	3	7	bottom	NA	19	10	19-Oct	2017	18/12/2017	29	22	24	2	NA	202	10	0	182_3_7_19-Oct	0	0	0	0.090909091
182	3	7	top	NA	19	10	19-Oct	2017	18/12/2017	29	14	15	1	NA	203	10	0	182_3_7_19-Oct	0	0	0	0.428571429
53	1	1	bottom	NA	19	10	19-Oct	2017	18/12/2017	29	13	16	3	NA	100	10	0	53_1_1_19-Oct	0	0	0	1
53	1	1	top	NA	19	10	19-Oct	2017	18/12/2017	29	12	15	3	NA	101	10	0	53_1_1_19-Oct	0	0	0	1
53	2	1	bottom	NA	19	10	19-Oct	2017	18/12/2017	29	19	20	1	NA	102	10	0	53_2_1_19-Oct	0	0	0	1
53	2	1	top	NA	19	10	19-Oct	2017	18/12/2017	29	19	19	0	NA	103	10	0	53_2_1_19-Oct	0	0	0	1
53	3	1	bottom	NA	19	10	19-Oct	2017	18/12/2017	29	11	14	3	NA	104	10	0	53_3_1_19-Oct	0	0	0	0.727272727
53	3	1	top	NA	19	10	19-Oct	2017	18/12/2017	29	12	13	1	NA	105	10	0	53_3_1_19-Oct	0	0	0	0.583333333
53	4	1	bottom	NA	19	10	19-Oct	2017	18/12/2017	29	3	19	16	NA	106	10	0	53_4_1_19-Oct	0	0	0	1
53	4	1	top	NA	19	10	19-Oct	2017	18/12/2017	29	5	12	7	NA	107	10	0	53_4_1_19-Oct	0	0	0	0.4
53	5	1	bottom	NA	19	10	19-Oct	2017	18/12/2017	29	21	23	2	NA	108	10	0	53_5_1_19-Oct	0	0	0	1
53	5	1	top	NA	19	10	19-Oct	2017	18/12/2017	29	17	17	0	NA	109	10	0	53_5_1_19-Oct	0	0	0	1
53	6	1	bottom	NA	19	10	19-Oct	2017	18/12/2017	29	3	10	7	NA	110	10	0	53_6_1_19-Oct	0	0	0	0.666666667
53	6	1	top	NA	19	10	19-Oct	2017	18/12/2017	29	9	11	2	NA	111	10	0	53_6_1_19-Oct	0	0	0	1
53	7	1	bottom	NA	19	10	19-Oct	2017	18/12/2017	29	18	22	4	NA	112	10	0	53_7_1_19-Oct	0	0	0	0.833333333
53	7	1	top	NA	19	10	19-Oct	2017	18/12/2017	29	17	17	0	NA	113	10	0	53_7_1_19-Oct	0	0	0	0.941176471
53	8	1	bottom	NA	19	10	19-Oct	2017	18/12/2017	29	21	22	1	NA	114	10	0	53_8_1_19-Oct	0	0	0	1
53	8	1	top	NA	19	10	19-Oct	2017	18/12/2017	29	20	20	0	NA	115	10	0	53_8_1_19-Oct	0	0	0	1
53	9	1	bottom	NA	19	10	19-Oct	2017	18/12/2017	29	10	18	8	NA	116	10	0	53_9_1_19-Oct	0	0	0	0.8
53	9	1	top	NA	19	10	19-Oct	2017	18/12/2017	29	11	12	1	NA	117	10	0	53_9_1_19-Oct	0	0	0	0.636363636
53	10	1	bottom	NA	19	10	19-Oct	2017	18/12/2017	29	6	22	16	NA	118	10	0	53_10_1_19-Oct	0	0	0	0.5
53	10	1	top	NA	19	10	19-Oct	2017	18/12/2017	29	14	14	0	NA	119	10	0	53_10_1_19-Oct	0	0	0	0.928571429
182	1	1	bottom	NA	19	10	19-Oct	2017	18/12/2017	29	15	15	0	NA	160	11	3	182_1_1_19-Oct	20	20	0.2	0.8
182	1	1	top	NA	19	10	19-Oct	2017	18/12/2017	29	6	6	0	NA	161	11	1	182_1_1_19-Oct	16.66666667	16.66666667	0.166666667	1
182	1	10	bottom	NA	19	10	19-Oct	2017	18/12/2017	29	9	12	3	NA	176	11	4	182_1_10_19-Oct	33.33333333	44.44444444	0.444444444	0.777777778
182	1	10	top	NA	19	10	19-Oct	2017	18/12/2017	29	6	6	0	NA	177	11	2	182_1_10_19-Oct	33.33333333	33.33333333	0.333333333	0.833333333
182	1	2	bottom	NA	19	10	19-Oct	2017	18/12/2017	29	22	22	0	NA	178	11	0	182_1_2_19-Oct	0	0	0	0.772727273
182	1	2	top	NA	19	10	19-Oct	2017	18/12/2017	29	10	10	0	NA	179	11	0	182_1_2_19-Oct	0	0	0	1
182	1	3	bottom	NA	19	10	19-Oct	2017	18/12/2017	29	19	19	0	NA	162	11	1	182_1_3_19-Oct	5.263157895	5.263157895	0.052631579	0.578947368
182	1	3	top	NA	19	10	19-Oct	2017	18/12/2017	29	5	5	0	NA	163	11	1	182_1_3_19-Oct	20	20	0.2	0.6
182	1	4	bottom	NA	19	10	19-Oct	2017	18/12/2017	29	8	9	1	NA	164	11	2	182_1_4_19-Oct	22.22222222	25	0.25	0.875
182	1	4	top	NA	19	10	19-Oct	2017	18/12/2017	29	5	6	1	NA	165	11	0	182_1_4_19-Oct	0	0	0	1
182	1	5	bottom	NA	19	10	19-Oct	2017	18/12/2017	29	16	22	6	NA	166	11	8	182_1_5_19-Oct	36.36363636	50	0.5	0.6875
182	1	5	top	NA	19	10	19-Oct	2017	18/12/2017	29	12	15	3	NA	167	11	4	182_1_5_19-Oct	26.66666667	33.33333333	0.333333333	0.75
182	1	6	bottom	NA	19	10	19-Oct	2017	18/12/2017	29	15	15	0	NA	168	11	7	182_1_6_19-Oct	46.66666667	46.66666667	0.466666667	0.6
182	1	6	top	NA	19	10	19-Oct	2017	18/12/2017	29	10	12	2	NA	169	11	4	182_1_6_19-Oct	33.33333333	40	0.4	0.6
182	1	7	bottom	NA	19	10	19-Oct	2017	18/12/2017	29	20	20	0	NA	170	11	3	182_1_7_19-Oct	15	15	0.15	0.45
182	1	7	top	NA	19	10	19-Oct	2017	18/12/2017	29	17	17	0	NA	171	11	2	182_1_7_19-Oct	11.76470588	11.76470588	0.117647059	0.764705882
182	1	8	bottom	NA	19	10	19-Oct	2017	18/12/2017	29	12	12	0	NA	172	11	0	182_1_8_19-Oct	0	0	0	0.75
182	1	8	top	NA	19	10	19-Oct	2017	18/12/2017	29	9	9	0	NA	173	11	0	182_1_8_19-Oct	0	0	0	1
182	1	9	bottom	NA	19	10	19-Oct	2017	18/12/2017	29	14	14	0	NA	174	11	1	182_1_9_19-Oct	7.142857143	7.142857143	0.071428571	0.5
182	1	9	top	NA	19	10	19-Oct	2017	18/12/2017	29	17	17	0	NA	175	11	1	182_1_9_19-Oct	5.882352941	5.882352941	0.058823529	1
182	2	1	bottom	NA	19	10	19-Oct	2017	18/12/2017	29	16	16	0	NA	180	11	2	182_2_1_19-Oct	12.5	12.5	0.125	1
182	2	1	top	NA	19	10	19-Oct	2017	18/12/2017	29	13	13	0	NA	181	11	0	182_2_1_19-Oct	0	0	0	0.846153846
182	2	3	bottom	NA	19	10	19-Oct	2017	18/12/2017	29	9	9	0	NA	182	11	1	182_2_3_19-Oct	11.11111111	11.11111111	0.111111111	1
182	2	3	top	NA	19	10	19-Oct	2017	18/12/2017	29	10	10	0	NA	183	11	0	182_2_3_19-Oct	0	0	0	1
182	2	4	bottom	NA	19	10	19-Oct	2017	18/12/2017	29	13	14	1	NA	184	11	0	182_2_4_19-Oct	0	0	0	1
182	2	4	top	NA	19	10	19-Oct	2017	18/12/2017	29	14	14	0	NA	185	11	1	182_2_4_19-Oct	7.142857143	7.142857143	0.071428571	0.785714286
182	2	5	bottom	NA	19	10	19-Oct	2017	18/12/2017	29	18	18	0	NA	186	11	3	182_2_5_19-Oct	16.66666667	16.66666667	0.166666667	1
182	2	5	top	NA	19	10	19-Oct	2017	18/12/2017	29	12	13	1	NA	187	11	2	182_2_5_19-Oct	15.38461538	16.66666667	0.166666667	0.916666667
182	2	6	bottom	NA	19	10	19-Oct	2017	18/12/2017	29	11	20	9	NA	188	11	1	182_2_6_19-Oct	5	9.090909091	0.090909091	0.272727273
182	2	6	top	NA	19	10	19-Oct	2017	18/12/2017	29	16	18	2	NA	189	11	2	182_2_6_19-Oct	11.11111111	12.5	0.125	0.375
182	2	7	bottom	NA	19	10	19-Oct	2017	18/12/2017	29	11	21	10	NA	190	11	2	182_2_7_19-Oct	9.523809524	18.18181818	0.181818182	0.454545455
182	2	7	top	NA	19	10	19-Oct	2017	18/12/2017	29	11	14	3	NA	191	11	1	182_2_7_19-Oct	7.142857143	9.090909091	0.090909091	0.727272727
182	3	1	bottom	NA	19	10	19-Oct	2017	18/12/2017	29	9	12	3	NA	192	11	1	182_3_1_19-Oct	8.333333333	11.11111111	0.111111111	0.444444444
182	3	1	top	NA	19	10	19-Oct	2017	18/12/2017	29	7	7	0	NA	193	11	1	182_3_1_19-Oct	14.28571429	14.28571429	0.142857143	0.714285714
182	3	3	bottom	NA	19	10	19-Oct	2017	18/12/2017	29	9	13	4	NA	194	11	0	182_3_3_19-Oct	0	0	0	0.666666667
182	3	3	top	NA	19	10	19-Oct	2017	18/12/2017	29	7	7	0	NA	195	11	1	182_3_3_19-Oct	14.28571429	14.28571429	0.142857143	0.428571429
182	3	4	bottom	NA	19	10	19-Oct	2017	18/12/2017	29	5	5	0	NA	196	11	3	182_3_4_19-Oct	60	60	0.6	0.6
182	3	4	top	NA	19	10	19-Oct	2017	18/12/2017	29	13	13	0	NA	197	11	0	182_3_4_19-Oct	0	0	0	0.615384615
182	3	5	bottom	NA	19	10	19-Oct	2017	18/12/2017	29	13	13	0	NA	198	11	3	182_3_5_19-Oct	23.07692308	23.07692308	0.230769231	0.307692308
182	3	5	top	NA	19	10	19-Oct	2017	18/12/2017	29	10	10	0	NA	199	11	0	182_3_5_19-Oct	0	0	0	1
182	3	6	bottom	NA	19	10	19-Oct	2017	18/12/2017	29	8	9	1	NA	200	11	1	182_3_6_19-Oct	11.11111111	12.5	0.125	0.25
182	3	6	top	NA	19	10	19-Oct	2017	18/12/2017	29	6	7	1	NA	201	11	2	182_3_6_19-Oct	28.57142857	33.33333333	0.333333333	0.5
182	3	7	bottom	NA	19	10	19-Oct	2017	18/12/2017	29	22	24	2	NA	202	11	4	182_3_7_19-Oct	16.66666667	18.18181818	0.181818182	0.272727273
182	3	7	top	NA	19	10	19-Oct	2017	18/12/2017	29	14	15	1	NA	203	11	3	182_3_7_19-Oct	20	21.42857143	0.214285714	0.642857143
53	1	1	bottom	NA	19	10	19-Oct	2017	18/12/2017	29	13	16	3	NA	100	11	0	53_1_1_19-Oct	0	0	0	1
53	1	1	top	NA	19	10	19-Oct	2017	18/12/2017	29	12	15	3	NA	101	11	0	53_1_1_19-Oct	0	0	0	1
53	2	1	bottom	NA	19	10	19-Oct	2017	18/12/2017	29	19	20	1	NA	102	11	0	53_2_1_19-Oct	0	0	0	1
53	2	1	top	NA	19	10	19-Oct	2017	18/12/2017	29	19	19	0	NA	103	11	0	53_2_1_19-Oct	0	0	0	1
53	3	1	bottom	NA	19	10	19-Oct	2017	18/12/2017	29	11	14	3	NA	104	11	0	53_3_1_19-Oct	0	0	0	0.727272727
53	3	1	top	NA	19	10	19-Oct	2017	18/12/2017	29	12	13	1	NA	105	11	0	53_3_1_19-Oct	0	0	0	0.583333333
53	4	1	bottom	NA	19	10	19-Oct	2017	18/12/2017	29	3	19	16	NA	106	11	0	53_4_1_19-Oct	0	0	0	1
53	4	1	top	NA	19	10	19-Oct	2017	18/12/2017	29	5	12	7	NA	107	11	0	53_4_1_19-Oct	0	0	0	0.4
53	5	1	bottom	NA	19	10	19-Oct	2017	18/12/2017	29	21	23	2	NA	108	11	0	53_5_1_19-Oct	0	0	0	1
53	5	1	top	NA	19	10	19-Oct	2017	18/12/2017	29	17	17	0	NA	109	11	0	53_5_1_19-Oct	0	0	0	1
53	6	1	bottom	NA	19	10	19-Oct	2017	18/12/2017	29	3	10	7	NA	110	11	1	53_6_1_19-Oct	10	33.33333333	0.333333333	1
53	6	1	top	NA	19	10	19-Oct	2017	18/12/2017	29	9	11	2	NA	111	11	0	53_6_1_19-Oct	0	0	0	1
53	7	1	bottom	NA	19	10	19-Oct	2017	18/12/2017	29	18	22	4	NA	112	11	2	53_7_1_19-Oct	9.090909091	11.11111111	0.111111111	0.944444444
53	7	1	top	NA	19	10	19-Oct	2017	18/12/2017	29	17	17	0	NA	113	11	1	53_7_1_19-Oct	5.882352941	5.882352941	0.058823529	1
53	8	1	bottom	NA	19	10	19-Oct	2017	18/12/2017	29	21	22	1	NA	114	11	0	53_8_1_19-Oct	0	0	0	1
53	8	1	top	NA	19	10	19-Oct	2017	18/12/2017	29	20	20	0	NA	115	11	0	53_8_1_19-Oct	0	0	0	1
53	9	1	bottom	NA	19	10	19-Oct	2017	18/12/2017	29	10	18	8	NA	116	11	2	53_9_1_19-Oct	11.11111111	20	0.2	1
53	9	1	top	NA	19	10	19-Oct	2017	18/12/2017	29	11	12	1	NA	117	11	3	53_9_1_19-Oct	25	27.27272727	0.272727273	0.909090909
53	10	1	bottom	NA	19	10	19-Oct	2017	18/12/2017	29	6	22	16	NA	118	11	1	53_10_1_19-Oct	4.545454545	16.66666667	0.166666667	0.666666667
53	10	1	top	NA	19	10	19-Oct	2017	18/12/2017	29	14	14	0	NA	119	11	0	53_10_1_19-Oct	0	0	0	0.928571429
182	1	1	bottom	NA	19	10	19-Oct	2017	18/12/2017	29	15	15	0	NA	160	12	0	182_1_1_19-Oct	0	0	0	0.8
182	1	1	top	NA	19	10	19-Oct	2017	18/12/2017	29	6	6	0	NA	161	12	0	182_1_1_19-Oct	0	0	0	1
182	1	10	bottom	NA	19	10	19-Oct	2017	18/12/2017	29	9	12	3	NA	176	12	0	182_1_10_19-Oct	0	0	0	0.777777778
182	1	10	top	NA	19	10	19-Oct	2017	18/12/2017	29	6	6	0	NA	177	12	0	182_1_10_19-Oct	0	0	0	0.833333333
182	1	2	bottom	NA	19	10	19-Oct	2017	18/12/2017	29	22	22	0	NA	178	12	0	182_1_2_19-Oct	0	0	0	0.772727273
182	1	2	top	NA	19	10	19-Oct	2017	18/12/2017	29	10	10	0	NA	179	12	0	182_1_2_19-Oct	0	0	0	1
182	1	3	bottom	NA	19	10	19-Oct	2017	18/12/2017	29	19	19	0	NA	162	12	0	182_1_3_19-Oct	0	0	0	0.578947368
182	1	3	top	NA	19	10	19-Oct	2017	18/12/2017	29	5	5	0	NA	163	12	0	182_1_3_19-Oct	0	0	0	0.6
182	1	4	bottom	NA	19	10	19-Oct	2017	18/12/2017	29	8	9	1	NA	164	12	0	182_1_4_19-Oct	0	0	0	0.875
182	1	4	top	NA	19	10	19-Oct	2017	18/12/2017	29	5	6	1	NA	165	12	0	182_1_4_19-Oct	0	0	0	1
182	1	5	bottom	NA	19	10	19-Oct	2017	18/12/2017	29	16	22	6	NA	166	12	0	182_1_5_19-Oct	0	0	0	0.6875
182	1	5	top	NA	19	10	19-Oct	2017	18/12/2017	29	12	15	3	NA	167	12	1	182_1_5_19-Oct	6.666666667	8.333333333	0.083333333	0.833333333
182	1	6	bottom	NA	19	10	19-Oct	2017	18/12/2017	29	15	15	0	NA	168	12	0	182_1_6_19-Oct	0	0	0	0.6
182	1	6	top	NA	19	10	19-Oct	2017	18/12/2017	29	10	12	2	NA	169	12	0	182_1_6_19-Oct	0	0	0	0.6
182	1	7	bottom	NA	19	10	19-Oct	2017	18/12/2017	29	20	20	0	NA	170	12	0	182_1_7_19-Oct	0	0	0	0.45
182	1	7	top	NA	19	10	19-Oct	2017	18/12/2017	29	17	17	0	NA	171	12	0	182_1_7_19-Oct	0	0	0	0.764705882
182	1	8	bottom	NA	19	10	19-Oct	2017	18/12/2017	29	12	12	0	NA	172	12	0	182_1_8_19-Oct	0	0	0	0.75
182	1	8	top	NA	19	10	19-Oct	2017	18/12/2017	29	9	9	0	NA	173	12	0	182_1_8_19-Oct	0	0	0	1
182	1	9	bottom	NA	19	10	19-Oct	2017	18/12/2017	29	14	14	0	NA	174	12	1	182_1_9_19-Oct	7.142857143	7.142857143	0.071428571	0.571428571
182	1	9	top	NA	19	10	19-Oct	2017	18/12/2017	29	17	17	0	NA	175	12	0	182_1_9_19-Oct	0	0	0	1
182	2	1	bottom	NA	19	10	19-Oct	2017	18/12/2017	29	16	16	0	NA	180	12	0	182_2_1_19-Oct	0	0	0	1
182	2	1	top	NA	19	10	19-Oct	2017	18/12/2017	29	13	13	0	NA	181	12	0	182_2_1_19-Oct	0	0	0	0.846153846
182	2	3	bottom	NA	19	10	19-Oct	2017	18/12/2017	29	9	9	0	NA	182	12	0	182_2_3_19-Oct	0	0	0	1
182	2	3	top	NA	19	10	19-Oct	2017	18/12/2017	29	10	10	0	NA	183	12	0	182_2_3_19-Oct	0	0	0	1
182	2	4	bottom	NA	19	10	19-Oct	2017	18/12/2017	29	13	14	1	NA	184	12	0	182_2_4_19-Oct	0	0	0	1
182	2	4	top	NA	19	10	19-Oct	2017	18/12/2017	29	14	14	0	NA	185	12	0	182_2_4_19-Oct	0	0	0	0.785714286
182	2	5	bottom	NA	19	10	19-Oct	2017	18/12/2017	29	18	18	0	NA	186	12	0	182_2_5_19-Oct	0	0	0	1
182	2	5	top	NA	19	10	19-Oct	2017	18/12/2017	29	12	13	1	NA	187	12	0	182_2_5_19-Oct	0	0	0	0.916666667
182	2	6	bottom	NA	19	10	19-Oct	2017	18/12/2017	29	11	20	9	NA	188	12	1	182_2_6_19-Oct	5	9.090909091	0.090909091	0.363636364
182	2	6	top	NA	19	10	19-Oct	2017	18/12/2017	29	16	18	2	NA	189	12	0	182_2_6_19-Oct	0	0	0	0.375
182	2	7	bottom	NA	19	10	19-Oct	2017	18/12/2017	29	11	21	10	NA	190	12	0	182_2_7_19-Oct	0	0	0	0.454545455
182	2	7	top	NA	19	10	19-Oct	2017	18/12/2017	29	11	14	3	NA	191	12	0	182_2_7_19-Oct	0	0	0	0.727272727
182	3	1	bottom	NA	19	10	19-Oct	2017	18/12/2017	29	9	12	3	NA	192	12	0	182_3_1_19-Oct	0	0	0	0.444444444
182	3	1	top	NA	19	10	19-Oct	2017	18/12/2017	29	7	7	0	NA	193	12	0	182_3_1_19-Oct	0	0	0	0.714285714
182	3	3	bottom	NA	19	10	19-Oct	2017	18/12/2017	29	9	13	4	NA	194	12	0	182_3_3_19-Oct	0	0	0	0.666666667
182	3	3	top	NA	19	10	19-Oct	2017	18/12/2017	29	7	7	0	NA	195	12	0	182_3_3_19-Oct	0	0	0	0.428571429
182	3	4	bottom	NA	19	10	19-Oct	2017	18/12/2017	29	5	5	0	NA	196	12	0	182_3_4_19-Oct	0	0	0	0.6
182	3	4	top	NA	19	10	19-Oct	2017	18/12/2017	29	13	13	0	NA	197	12	0	182_3_4_19-Oct	0	0	0	0.615384615
182	3	5	bottom	NA	19	10	19-Oct	2017	18/12/2017	29	13	13	0	NA	198	12	0	182_3_5_19-Oct	0	0	0	0.307692308
182	3	5	top	NA	19	10	19-Oct	2017	18/12/2017	29	10	10	0	NA	199	12	0	182_3_5_19-Oct	0	0	0	1
182	3	6	bottom	NA	19	10	19-Oct	2017	18/12/2017	29	8	9	1	NA	200	12	0	182_3_6_19-Oct	0	0	0	0.25
182	3	6	top	NA	19	10	19-Oct	2017	18/12/2017	29	6	7	1	NA	201	12	0	182_3_6_19-Oct	0	0	0	0.5
182	3	7	bottom	NA	19	10	19-Oct	2017	18/12/2017	29	22	24	2	NA	202	12	1	182_3_7_19-Oct	4.166666667	4.545454545	0.045454545	0.318181818
182	3	7	top	NA	19	10	19-Oct	2017	18/12/2017	29	14	15	1	NA	203	12	0	182_3_7_19-Oct	0	0	0	0.642857143
53	1	1	bottom	NA	19	10	19-Oct	2017	18/12/2017	29	13	16	3	NA	100	12	0	53_1_1_19-Oct	0	0	0	1
53	1	1	top	NA	19	10	19-Oct	2017	18/12/2017	29	12	15	3	NA	101	12	0	53_1_1_19-Oct	0	0	0	1
53	2	1	bottom	NA	19	10	19-Oct	2017	18/12/2017	29	19	20	1	NA	102	12	0	53_2_1_19-Oct	0	0	0	1
53	2	1	top	NA	19	10	19-Oct	2017	18/12/2017	29	19	19	0	NA	103	12	0	53_2_1_19-Oct	0	0	0	1
53	3	1	bottom	NA	19	10	19-Oct	2017	18/12/2017	29	11	14	3	NA	104	12	0	53_3_1_19-Oct	0	0	0	0.727272727
53	3	1	top	NA	19	10	19-Oct	2017	18/12/2017	29	12	13	1	NA	105	12	1	53_3_1_19-Oct	7.692307692	8.333333333	0.083333333	0.666666667
53	4	1	bottom	NA	19	10	19-Oct	2017	18/12/2017	29	3	19	16	NA	106	12	0	53_4_1_19-Oct	0	0	0	1
53	4	1	top	NA	19	10	19-Oct	2017	18/12/2017	29	5	12	7	NA	107	12	0	53_4_1_19-Oct	0	0	0	0.4
53	5	1	bottom	NA	19	10	19-Oct	2017	18/12/2017	29	21	23	2	NA	108	12	0	53_5_1_19-Oct	0	0	0	1
53	5	1	top	NA	19	10	19-Oct	2017	18/12/2017	29	17	17	0	NA	109	12	0	53_5_1_19-Oct	0	0	0	1
53	6	1	bottom	NA	19	10	19-Oct	2017	18/12/2017	29	3	10	7	NA	110	12	0	53_6_1_19-Oct	0	0	0	1
53	6	1	top	NA	19	10	19-Oct	2017	18/12/2017	29	9	11	2	NA	111	12	0	53_6_1_19-Oct	0	0	0	1
53	7	1	bottom	NA	19	10	19-Oct	2017	18/12/2017	29	18	22	4	NA	112	12	1	53_7_1_19-Oct	4.545454545	5.555555556	0.055555556	1
53	7	1	top	NA	19	10	19-Oct	2017	18/12/2017	29	17	17	0	NA	113	12	0	53_7_1_19-Oct	0	0	0	1
53	8	1	bottom	NA	19	10	19-Oct	2017	18/12/2017	29	21	22	1	NA	114	12	0	53_8_1_19-Oct	0	0	0	1
53	8	1	top	NA	19	10	19-Oct	2017	18/12/2017	29	20	20	0	NA	115	12	0	53_8_1_19-Oct	0	0	0	1
53	9	1	bottom	NA	19	10	19-Oct	2017	18/12/2017	29	10	18	8	NA	116	12	0	53_9_1_19-Oct	0	0	0	1
53	9	1	top	NA	19	10	19-Oct	2017	18/12/2017	29	11	12	1	NA	117	12	1	53_9_1_19-Oct	8.333333333	9.090909091	0.090909091	1
53	10	1	bottom	NA	19	10	19-Oct	2017	18/12/2017	29	6	22	16	NA	118	12	2	53_10_1_19-Oct	9.090909091	33.33333333	0.333333333	1
53	10	1	top	NA	19	10	19-Oct	2017	18/12/2017	29	14	14	0	NA	119	12	0	53_10_1_19-Oct	0	0	0	0.928571429
182	1	1	bottom	NA	19	10	19-Oct	2017	18/12/2017	29	15	15	0	NA	160	13	0	182_1_1_19-Oct	0	0	0	0.8
182	1	1	top	NA	19	10	19-Oct	2017	18/12/2017	29	6	6	0	NA	161	13	0	182_1_1_19-Oct	0	0	0	1
182	1	10	bottom	NA	19	10	19-Oct	2017	18/12/2017	29	9	12	3	NA	176	13	0	182_1_10_19-Oct	0	0	0	0.777777778
182	1	10	top	NA	19	10	19-Oct	2017	18/12/2017	29	6	6	0	NA	177	13	0	182_1_10_19-Oct	0	0	0	0.833333333
182	1	2	bottom	NA	19	10	19-Oct	2017	18/12/2017	29	22	22	0	NA	178	13	0	182_1_2_19-Oct	0	0	0	0.772727273
182	1	2	top	NA	19	10	19-Oct	2017	18/12/2017	29	10	10	0	NA	179	13	0	182_1_2_19-Oct	0	0	0	1
182	1	3	bottom	NA	19	10	19-Oct	2017	18/12/2017	29	19	19	0	NA	162	13	0	182_1_3_19-Oct	0	0	0	0.578947368
182	1	3	top	NA	19	10	19-Oct	2017	18/12/2017	29	5	5	0	NA	163	13	0	182_1_3_19-Oct	0	0	0	0.6
182	1	4	bottom	NA	19	10	19-Oct	2017	18/12/2017	29	8	9	1	NA	164	13	0	182_1_4_19-Oct	0	0	0	0.875
182	1	4	top	NA	19	10	19-Oct	2017	18/12/2017	29	5	6	1	NA	165	13	0	182_1_4_19-Oct	0	0	0	1
182	1	5	bottom	NA	19	10	19-Oct	2017	18/12/2017	29	16	22	6	NA	166	13	0	182_1_5_19-Oct	0	0	0	0.6875
182	1	5	top	NA	19	10	19-Oct	2017	18/12/2017	29	12	15	3	NA	167	13	0	182_1_5_19-Oct	0	0	0	0.833333333
182	1	6	bottom	NA	19	10	19-Oct	2017	18/12/2017	29	15	15	0	NA	168	13	1	182_1_6_19-Oct	6.666666667	6.666666667	0.066666667	0.666666667
182	1	6	top	NA	19	10	19-Oct	2017	18/12/2017	29	10	12	2	NA	169	13	0	182_1_6_19-Oct	0	0	0	0.6
182	1	7	bottom	NA	19	10	19-Oct	2017	18/12/2017	29	20	20	0	NA	170	13	0	182_1_7_19-Oct	0	0	0	0.45
182	1	7	top	NA	19	10	19-Oct	2017	18/12/2017	29	17	17	0	NA	171	13	0	182_1_7_19-Oct	0	0	0	0.764705882
182	1	8	bottom	NA	19	10	19-Oct	2017	18/12/2017	29	12	12	0	NA	172	13	0	182_1_8_19-Oct	0	0	0	0.75
182	1	8	top	NA	19	10	19-Oct	2017	18/12/2017	29	9	9	0	NA	173	13	0	182_1_8_19-Oct	0	0	0	1
182	1	9	bottom	NA	19	10	19-Oct	2017	18/12/2017	29	14	14	0	NA	174	13	1	182_1_9_19-Oct	7.142857143	7.142857143	0.071428571	0.642857143
182	1	9	top	NA	19	10	19-Oct	2017	18/12/2017	29	17	17	0	NA	175	13	0	182_1_9_19-Oct	0	0	0	1
182	2	1	bottom	NA	19	10	19-Oct	2017	18/12/2017	29	16	16	0	NA	180	13	0	182_2_1_19-Oct	0	0	0	1
182	2	1	top	NA	19	10	19-Oct	2017	18/12/2017	29	13	13	0	NA	181	13	0	182_2_1_19-Oct	0	0	0	0.846153846
182	2	3	bottom	NA	19	10	19-Oct	2017	18/12/2017	29	9	9	0	NA	182	13	0	182_2_3_19-Oct	0	0	0	1
182	2	3	top	NA	19	10	19-Oct	2017	18/12/2017	29	10	10	0	NA	183	13	0	182_2_3_19-Oct	0	0	0	1
182	2	4	bottom	NA	19	10	19-Oct	2017	18/12/2017	29	13	14	1	NA	184	13	0	182_2_4_19-Oct	0	0	0	1
182	2	4	top	NA	19	10	19-Oct	2017	18/12/2017	29	14	14	0	NA	185	13	0	182_2_4_19-Oct	0	0	0	0.785714286
182	2	5	bottom	NA	19	10	19-Oct	2017	18/12/2017	29	18	18	0	NA	186	13	0	182_2_5_19-Oct	0	0	0	1
182	2	5	top	NA	19	10	19-Oct	2017	18/12/2017	29	12	13	1	NA	187	13	0	182_2_5_19-Oct	0	0	0	0.916666667
182	2	6	bottom	NA	19	10	19-Oct	2017	18/12/2017	29	11	20	9	NA	188	13	0	182_2_6_19-Oct	0	0	0	0.363636364
182	2	6	top	NA	19	10	19-Oct	2017	18/12/2017	29	16	18	2	NA	189	13	0	182_2_6_19-Oct	0	0	0	0.375
182	2	7	bottom	NA	19	10	19-Oct	2017	18/12/2017	29	11	21	10	NA	190	13	1	182_2_7_19-Oct	4.761904762	9.090909091	0.090909091	0.545454545
182	2	7	top	NA	19	10	19-Oct	2017	18/12/2017	29	11	14	3	NA	191	13	0	182_2_7_19-Oct	0	0	0	0.727272727
182	3	1	bottom	NA	19	10	19-Oct	2017	18/12/2017	29	9	12	3	NA	192	13	0	182_3_1_19-Oct	0	0	0	0.444444444
182	3	1	top	NA	19	10	19-Oct	2017	18/12/2017	29	7	7	0	NA	193	13	0	182_3_1_19-Oct	0	0	0	0.714285714
182	3	3	bottom	NA	19	10	19-Oct	2017	18/12/2017	29	9	13	4	NA	194	13	0	182_3_3_19-Oct	0	0	0	0.666666667
182	3	3	top	NA	19	10	19-Oct	2017	18/12/2017	29	7	7	0	NA	195	13	0	182_3_3_19-Oct	0	0	0	0.428571429
182	3	4	bottom	NA	19	10	19-Oct	2017	18/12/2017	29	5	5	0	NA	196	13	0	182_3_4_19-Oct	0	0	0	0.6
182	3	4	top	NA	19	10	19-Oct	2017	18/12/2017	29	13	13	0	NA	197	13	0	182_3_4_19-Oct	0	0	0	0.615384615
182	3	5	bottom	NA	19	10	19-Oct	2017	18/12/2017	29	13	13	0	NA	198	13	1	182_3_5_19-Oct	7.692307692	7.692307692	0.076923077	0.384615385
182	3	5	top	NA	19	10	19-Oct	2017	18/12/2017	29	10	10	0	NA	199	13	0	182_3_5_19-Oct	0	0	0	1
182	3	6	bottom	NA	19	10	19-Oct	2017	18/12/2017	29	8	9	1	NA	200	13	0	182_3_6_19-Oct	0	0	0	0.25
182	3	6	top	NA	19	10	19-Oct	2017	18/12/2017	29	6	7	1	NA	201	13	0	182_3_6_19-Oct	0	0	0	0.5
182	3	7	bottom	NA	19	10	19-Oct	2017	18/12/2017	29	22	24	2	NA	202	13	1	182_3_7_19-Oct	4.166666667	4.545454545	0.045454545	0.363636364
182	3	7	top	NA	19	10	19-Oct	2017	18/12/2017	29	14	15	1	NA	203	13	0	182_3_7_19-Oct	0	0	0	0.642857143
53	1	1	bottom	NA	19	10	19-Oct	2017	18/12/2017	29	13	16	3	NA	100	13	0	53_1_1_19-Oct	0	0	0	1
53	1	1	top	NA	19	10	19-Oct	2017	18/12/2017	29	12	15	3	NA	101	13	0	53_1_1_19-Oct	0	0	0	1
53	2	1	bottom	NA	19	10	19-Oct	2017	18/12/2017	29	19	20	1	NA	102	13	0	53_2_1_19-Oct	0	0	0	1
53	2	1	top	NA	19	10	19-Oct	2017	18/12/2017	29	19	19	0	NA	103	13	0	53_2_1_19-Oct	0	0	0	1
53	3	1	bottom	NA	19	10	19-Oct	2017	18/12/2017	29	11	14	3	NA	104	13	0	53_3_1_19-Oct	0	0	0	0.727272727
53	3	1	top	NA	19	10	19-Oct	2017	18/12/2017	29	12	13	1	NA	105	13	0	53_3_1_19-Oct	0	0	0	0.666666667
53	4	1	bottom	NA	19	10	19-Oct	2017	18/12/2017	29	3	19	16	NA	106	13	0	53_4_1_19-Oct	0	0	0	1
53	4	1	top	NA	19	10	19-Oct	2017	18/12/2017	29	5	12	7	NA	107	13	0	53_4_1_19-Oct	0	0	0	0.4
53	5	1	bottom	NA	19	10	19-Oct	2017	18/12/2017	29	21	23	2	NA	108	13	0	53_5_1_19-Oct	0	0	0	1
53	5	1	top	NA	19	10	19-Oct	2017	18/12/2017	29	17	17	0	NA	109	13	0	53_5_1_19-Oct	0	0	0	1
53	6	1	bottom	NA	19	10	19-Oct	2017	18/12/2017	29	3	10	7	NA	110	13	0	53_6_1_19-Oct	0	0	0	1
53	6	1	top	NA	19	10	19-Oct	2017	18/12/2017	29	9	11	2	NA	111	13	0	53_6_1_19-Oct	0	0	0	1
53	7	1	bottom	NA	19	10	19-Oct	2017	18/12/2017	29	18	22	4	NA	112	13	0	53_7_1_19-Oct	0	0	0	1
53	7	1	top	NA	19	10	19-Oct	2017	18/12/2017	29	17	17	0	NA	113	13	0	53_7_1_19-Oct	0	0	0	1
53	8	1	bottom	NA	19	10	19-Oct	2017	18/12/2017	29	21	22	1	NA	114	13	0	53_8_1_19-Oct	0	0	0	1
53	8	1	top	NA	19	10	19-Oct	2017	18/12/2017	29	20	20	0	NA	115	13	0	53_8_1_19-Oct	0	0	0	1
53	9	1	bottom	NA	19	10	19-Oct	2017	18/12/2017	29	10	18	8	NA	116	13	0	53_9_1_19-Oct	0	0	0	1
53	9	1	top	NA	19	10	19-Oct	2017	18/12/2017	29	11	12	1	NA	117	13	0	53_9_1_19-Oct	0	0	0	1
53	10	1	bottom	NA	19	10	19-Oct	2017	18/12/2017	29	6	22	16	NA	118	13	0	53_10_1_19-Oct	0	0	0	1
53	10	1	top	NA	19	10	19-Oct	2017	18/12/2017	29	14	14	0	NA	119	13	0	53_10_1_19-Oct	0	0	0	0.928571429
182	1	1	bottom	NA	19	10	19-Oct	2017	18/12/2017	29	15	15	0	NA	160	14	0	182_1_1_19-Oct	0	0	0	0.8
182	1	1	top	NA	19	10	19-Oct	2017	18/12/2017	29	6	6	0	NA	161	14	0	182_1_1_19-Oct	0	0	0	1
182	1	10	bottom	NA	19	10	19-Oct	2017	18/12/2017	29	9	12	3	NA	176	14	0	182_1_10_19-Oct	0	0	0	0.777777778
182	1	10	top	NA	19	10	19-Oct	2017	18/12/2017	29	6	6	0	NA	177	14	0	182_1_10_19-Oct	0	0	0	0.833333333
182	1	2	bottom	NA	19	10	19-Oct	2017	18/12/2017	29	22	22	0	NA	178	14	0	182_1_2_19-Oct	0	0	0	0.772727273
182	1	2	top	NA	19	10	19-Oct	2017	18/12/2017	29	10	10	0	NA	179	14	0	182_1_2_19-Oct	0	0	0	1
182	1	3	bottom	NA	19	10	19-Oct	2017	18/12/2017	29	19	19	0	NA	162	14	0	182_1_3_19-Oct	0	0	0	0.578947368
182	1	3	top	NA	19	10	19-Oct	2017	18/12/2017	29	5	5	0	NA	163	14	0	182_1_3_19-Oct	0	0	0	0.6
182	1	4	bottom	NA	19	10	19-Oct	2017	18/12/2017	29	8	9	1	NA	164	14	0	182_1_4_19-Oct	0	0	0	0.875
182	1	4	top	NA	19	10	19-Oct	2017	18/12/2017	29	5	6	1	NA	165	14	0	182_1_4_19-Oct	0	0	0	1
182	1	5	bottom	NA	19	10	19-Oct	2017	18/12/2017	29	16	22	6	NA	166	14	0	182_1_5_19-Oct	0	0	0	0.6875
182	1	5	top	NA	19	10	19-Oct	2017	18/12/2017	29	12	15	3	NA	167	14	0	182_1_5_19-Oct	0	0	0	0.833333333
182	1	6	bottom	NA	19	10	19-Oct	2017	18/12/2017	29	15	15	0	NA	168	14	0	182_1_6_19-Oct	0	0	0	0.666666667
182	1	6	top	NA	19	10	19-Oct	2017	18/12/2017	29	10	12	2	NA	169	14	0	182_1_6_19-Oct	0	0	0	0.6
182	1	7	bottom	NA	19	10	19-Oct	2017	18/12/2017	29	20	20	0	NA	170	14	0	182_1_7_19-Oct	0	0	0	0.45
182	1	7	top	NA	19	10	19-Oct	2017	18/12/2017	29	17	17	0	NA	171	14	0	182_1_7_19-Oct	0	0	0	0.764705882
182	1	8	bottom	NA	19	10	19-Oct	2017	18/12/2017	29	12	12	0	NA	172	14	0	182_1_8_19-Oct	0	0	0	0.75
182	1	8	top	NA	19	10	19-Oct	2017	18/12/2017	29	9	9	0	NA	173	14	0	182_1_8_19-Oct	0	0	0	1
182	1	9	bottom	NA	19	10	19-Oct	2017	18/12/2017	29	14	14	0	NA	174	14	0	182_1_9_19-Oct	0	0	0	0.642857143
182	1	9	top	NA	19	10	19-Oct	2017	18/12/2017	29	17	17	0	NA	175	14	0	182_1_9_19-Oct	0	0	0	1
182	2	1	bottom	NA	19	10	19-Oct	2017	18/12/2017	29	16	16	0	NA	180	14	0	182_2_1_19-Oct	0	0	0	1
182	2	1	top	NA	19	10	19-Oct	2017	18/12/2017	29	13	13	0	NA	181	14	0	182_2_1_19-Oct	0	0	0	0.846153846
182	2	3	bottom	NA	19	10	19-Oct	2017	18/12/2017	29	9	9	0	NA	182	14	0	182_2_3_19-Oct	0	0	0	1
182	2	3	top	NA	19	10	19-Oct	2017	18/12/2017	29	10	10	0	NA	183	14	0	182_2_3_19-Oct	0	0	0	1
182	2	4	bottom	NA	19	10	19-Oct	2017	18/12/2017	29	13	14	1	NA	184	14	0	182_2_4_19-Oct	0	0	0	1
182	2	4	top	NA	19	10	19-Oct	2017	18/12/2017	29	14	14	0	NA	185	14	1	182_2_4_19-Oct	7.142857143	7.142857143	0.071428571	0.857142857
182	2	5	bottom	NA	19	10	19-Oct	2017	18/12/2017	29	18	18	0	NA	186	14	0	182_2_5_19-Oct	0	0	0	1
182	2	5	top	NA	19	10	19-Oct	2017	18/12/2017	29	12	13	1	NA	187	14	1	182_2_5_19-Oct	7.692307692	8.333333333	0.083333333	1
182	2	6	bottom	NA	19	10	19-Oct	2017	18/12/2017	29	11	20	9	NA	188	14	1	182_2_6_19-Oct	5	9.090909091	0.090909091	0.454545455
182	2	6	top	NA	19	10	19-Oct	2017	18/12/2017	29	16	18	2	NA	189	14	1	182_2_6_19-Oct	5.555555556	6.25	0.0625	0.4375
182	2	7	bottom	NA	19	10	19-Oct	2017	18/12/2017	29	11	21	10	NA	190	14	0	182_2_7_19-Oct	0	0	0	0.545454545
182	2	7	top	NA	19	10	19-Oct	2017	18/12/2017	29	11	14	3	NA	191	14	0	182_2_7_19-Oct	0	0	0	0.727272727
182	3	1	bottom	NA	19	10	19-Oct	2017	18/12/2017	29	9	12	3	NA	192	14	0	182_3_1_19-Oct	0	0	0	0.444444444
182	3	1	top	NA	19	10	19-Oct	2017	18/12/2017	29	7	7	0	NA	193	14	0	182_3_1_19-Oct	0	0	0	0.714285714
182	3	3	bottom	NA	19	10	19-Oct	2017	18/12/2017	29	9	13	4	NA	194	14	0	182_3_3_19-Oct	0	0	0	0.666666667
182	3	3	top	NA	19	10	19-Oct	2017	18/12/2017	29	7	7	0	NA	195	14	0	182_3_3_19-Oct	0	0	0	0.428571429
182	3	4	bottom	NA	19	10	19-Oct	2017	18/12/2017	29	5	5	0	NA	196	14	0	182_3_4_19-Oct	0	0	0	0.6
182	3	4	top	NA	19	10	19-Oct	2017	18/12/2017	29	13	13	0	NA	197	14	0	182_3_4_19-Oct	0	0	0	0.615384615
182	3	5	bottom	NA	19	10	19-Oct	2017	18/12/2017	29	13	13	0	NA	198	14	0	182_3_5_19-Oct	0	0	0	0.384615385
182	3	5	top	NA	19	10	19-Oct	2017	18/12/2017	29	10	10	0	NA	199	14	0	182_3_5_19-Oct	0	0	0	1
182	3	6	bottom	NA	19	10	19-Oct	2017	18/12/2017	29	8	9	1	NA	200	14	0	182_3_6_19-Oct	0	0	0	0.25
182	3	6	top	NA	19	10	19-Oct	2017	18/12/2017	29	6	7	1	NA	201	14	0	182_3_6_19-Oct	0	0	0	0.5
182	3	7	bottom	NA	19	10	19-Oct	2017	18/12/2017	29	22	24	2	NA	202	14	0	182_3_7_19-Oct	0	0	0	0.363636364
182	3	7	top	NA	19	10	19-Oct	2017	18/12/2017	29	14	15	1	NA	203	14	0	182_3_7_19-Oct	0	0	0	0.642857143
53	1	1	bottom	NA	19	10	19-Oct	2017	18/12/2017	29	13	16	3	NA	100	14	0	53_1_1_19-Oct	0	0	0	1
53	1	1	top	NA	19	10	19-Oct	2017	18/12/2017	29	12	15	3	NA	101	14	0	53_1_1_19-Oct	0	0	0	1
53	2	1	bottom	NA	19	10	19-Oct	2017	18/12/2017	29	19	20	1	NA	102	14	0	53_2_1_19-Oct	0	0	0	1
53	2	1	top	NA	19	10	19-Oct	2017	18/12/2017	29	19	19	0	NA	103	14	0	53_2_1_19-Oct	0	0	0	1
53	3	1	bottom	NA	19	10	19-Oct	2017	18/12/2017	29	11	14	3	NA	104	14	0	53_3_1_19-Oct	0	0	0	0.727272727
53	3	1	top	NA	19	10	19-Oct	2017	18/12/2017	29	12	13	1	NA	105	14	1	53_3_1_19-Oct	7.692307692	8.333333333	0.083333333	0.75
53	4	1	bottom	NA	19	10	19-Oct	2017	18/12/2017	29	3	19	16	NA	106	14	0	53_4_1_19-Oct	0	0	0	1
53	4	1	top	NA	19	10	19-Oct	2017	18/12/2017	29	5	12	7	NA	107	14	0	53_4_1_19-Oct	0	0	0	0.4
53	5	1	bottom	NA	19	10	19-Oct	2017	18/12/2017	29	21	23	2	NA	108	14	0	53_5_1_19-Oct	0	0	0	1
53	5	1	top	NA	19	10	19-Oct	2017	18/12/2017	29	17	17	0	NA	109	14	0	53_5_1_19-Oct	0	0	0	1
53	6	1	bottom	NA	19	10	19-Oct	2017	18/12/2017	29	3	10	7	NA	110	14	0	53_6_1_19-Oct	0	0	0	1
53	6	1	top	NA	19	10	19-Oct	2017	18/12/2017	29	9	11	2	NA	111	14	0	53_6_1_19-Oct	0	0	0	1
53	7	1	bottom	NA	19	10	19-Oct	2017	18/12/2017	29	18	22	4	NA	112	14	0	53_7_1_19-Oct	0	0	0	1
53	7	1	top	NA	19	10	19-Oct	2017	18/12/2017	29	17	17	0	NA	113	14	0	53_7_1_19-Oct	0	0	0	1
53	8	1	bottom	NA	19	10	19-Oct	2017	18/12/2017	29	21	22	1	NA	114	14	0	53_8_1_19-Oct	0	0	0	1
53	8	1	top	NA	19	10	19-Oct	2017	18/12/2017	29	20	20	0	NA	115	14	0	53_8_1_19-Oct	0	0	0	1
53	9	1	bottom	NA	19	10	19-Oct	2017	18/12/2017	29	10	18	8	NA	116	14	0	53_9_1_19-Oct	0	0	0	1
53	9	1	top	NA	19	10	19-Oct	2017	18/12/2017	29	11	12	1	NA	117	14	0	53_9_1_19-Oct	0	0	0	1
53	10	1	bottom	NA	19	10	19-Oct	2017	18/12/2017	29	6	22	16	NA	118	14	0	53_10_1_19-Oct	0	0	0	1
53	10	1	top	NA	19	10	19-Oct	2017	18/12/2017	29	14	14	0	NA	119	14	0	53_10_1_19-Oct	0	0	0	0.928571429
182	1	1	bottom	NA	19	10	19-Oct	2017	18/12/2017	29	15	15	0	NA	160	15	0	182_1_1_19-Oct	0	0	0	0.8
182	1	1	top	NA	19	10	19-Oct	2017	18/12/2017	29	6	6	0	NA	161	15	0	182_1_1_19-Oct	0	0	0	1
182	1	10	bottom	NA	19	10	19-Oct	2017	18/12/2017	29	9	12	3	NA	176	15	0	182_1_10_19-Oct	0	0	0	0.777777778
182	1	10	top	NA	19	10	19-Oct	2017	18/12/2017	29	6	6	0	NA	177	15	0	182_1_10_19-Oct	0	0	0	0.833333333
182	1	2	bottom	NA	19	10	19-Oct	2017	18/12/2017	29	22	22	0	NA	178	15	0	182_1_2_19-Oct	0	0	0	0.772727273
182	1	2	top	NA	19	10	19-Oct	2017	18/12/2017	29	10	10	0	NA	179	15	0	182_1_2_19-Oct	0	0	0	1
182	1	3	bottom	NA	19	10	19-Oct	2017	18/12/2017	29	19	19	0	NA	162	15	0	182_1_3_19-Oct	0	0	0	0.578947368
182	1	3	top	NA	19	10	19-Oct	2017	18/12/2017	29	5	5	0	NA	163	15	0	182_1_3_19-Oct	0	0	0	0.6
182	1	4	bottom	NA	19	10	19-Oct	2017	18/12/2017	29	8	9	1	NA	164	15	0	182_1_4_19-Oct	0	0	0	0.875
182	1	4	top	NA	19	10	19-Oct	2017	18/12/2017	29	5	6	1	NA	165	15	0	182_1_4_19-Oct	0	0	0	1
182	1	5	bottom	NA	19	10	19-Oct	2017	18/12/2017	29	16	22	6	NA	166	15	0	182_1_5_19-Oct	0	0	0	0.6875
182	1	5	top	NA	19	10	19-Oct	2017	18/12/2017	29	12	15	3	NA	167	15	0	182_1_5_19-Oct	0	0	0	0.833333333
182	1	6	bottom	NA	19	10	19-Oct	2017	18/12/2017	29	15	15	0	NA	168	15	0	182_1_6_19-Oct	0	0	0	0.666666667
182	1	6	top	NA	19	10	19-Oct	2017	18/12/2017	29	10	12	2	NA	169	15	0	182_1_6_19-Oct	0	0	0	0.6
182	1	7	bottom	NA	19	10	19-Oct	2017	18/12/2017	29	20	20	0	NA	170	15	0	182_1_7_19-Oct	0	0	0	0.45
182	1	7	top	NA	19	10	19-Oct	2017	18/12/2017	29	17	17	0	NA	171	15	0	182_1_7_19-Oct	0	0	0	0.764705882
182	1	8	bottom	NA	19	10	19-Oct	2017	18/12/2017	29	12	12	0	NA	172	15	0	182_1_8_19-Oct	0	0	0	0.75
182	1	8	top	NA	19	10	19-Oct	2017	18/12/2017	29	9	9	0	NA	173	15	0	182_1_8_19-Oct	0	0	0	1
182	1	9	bottom	NA	19	10	19-Oct	2017	18/12/2017	29	14	14	0	NA	174	15	0	182_1_9_19-Oct	0	0	0	0.642857143
182	1	9	top	NA	19	10	19-Oct	2017	18/12/2017	29	17	17	0	NA	175	15	0	182_1_9_19-Oct	0	0	0	1
182	2	1	bottom	NA	19	10	19-Oct	2017	18/12/2017	29	16	16	0	NA	180	15	0	182_2_1_19-Oct	0	0	0	1
182	2	1	top	NA	19	10	19-Oct	2017	18/12/2017	29	13	13	0	NA	181	15	1	182_2_1_19-Oct	7.692307692	7.692307692	0.076923077	0.923076923
182	2	3	bottom	NA	19	10	19-Oct	2017	18/12/2017	29	9	9	0	NA	182	15	0	182_2_3_19-Oct	0	0	0	1
182	2	3	top	NA	19	10	19-Oct	2017	18/12/2017	29	10	10	0	NA	183	15	0	182_2_3_19-Oct	0	0	0	1
182	2	4	bottom	NA	19	10	19-Oct	2017	18/12/2017	29	13	14	1	NA	184	15	0	182_2_4_19-Oct	0	0	0	1
182	2	4	top	NA	19	10	19-Oct	2017	18/12/2017	29	14	14	0	NA	185	15	0	182_2_4_19-Oct	0	0	0	0.857142857
182	2	5	bottom	NA	19	10	19-Oct	2017	18/12/2017	29	18	18	0	NA	186	15	0	182_2_5_19-Oct	0	0	0	1
182	2	5	top	NA	19	10	19-Oct	2017	18/12/2017	29	12	13	1	NA	187	15	0	182_2_5_19-Oct	0	0	0	1
182	2	6	bottom	NA	19	10	19-Oct	2017	18/12/2017	29	11	20	9	NA	188	15	0	182_2_6_19-Oct	0	0	0	0.454545455
182	2	6	top	NA	19	10	19-Oct	2017	18/12/2017	29	16	18	2	NA	189	15	0	182_2_6_19-Oct	0	0	0	0.4375
182	2	7	bottom	NA	19	10	19-Oct	2017	18/12/2017	29	11	21	10	NA	190	15	0	182_2_7_19-Oct	0	0	0	0.545454545
182	2	7	top	NA	19	10	19-Oct	2017	18/12/2017	29	11	14	3	NA	191	15	0	182_2_7_19-Oct	0	0	0	0.727272727
182	3	1	bottom	NA	19	10	19-Oct	2017	18/12/2017	29	9	12	3	NA	192	15	0	182_3_1_19-Oct	0	0	0	0.444444444
182	3	1	top	NA	19	10	19-Oct	2017	18/12/2017	29	7	7	0	NA	193	15	0	182_3_1_19-Oct	0	0	0	0.714285714
182	3	3	bottom	NA	19	10	19-Oct	2017	18/12/2017	29	9	13	4	NA	194	15	0	182_3_3_19-Oct	0	0	0	0.666666667
182	3	3	top	NA	19	10	19-Oct	2017	18/12/2017	29	7	7	0	NA	195	15	0	182_3_3_19-Oct	0	0	0	0.428571429
182	3	4	bottom	NA	19	10	19-Oct	2017	18/12/2017	29	5	5	0	NA	196	15	0	182_3_4_19-Oct	0	0	0	0.6
182	3	4	top	NA	19	10	19-Oct	2017	18/12/2017	29	13	13	0	NA	197	15	0	182_3_4_19-Oct	0	0	0	0.615384615
182	3	5	bottom	NA	19	10	19-Oct	2017	18/12/2017	29	13	13	0	NA	198	15	0	182_3_5_19-Oct	0	0	0	0.384615385
182	3	5	top	NA	19	10	19-Oct	2017	18/12/2017	29	10	10	0	NA	199	15	0	182_3_5_19-Oct	0	0	0	1
182	3	6	bottom	NA	19	10	19-Oct	2017	18/12/2017	29	8	9	1	NA	200	15	0	182_3_6_19-Oct	0	0	0	0.25
182	3	6	top	NA	19	10	19-Oct	2017	18/12/2017	29	6	7	1	NA	201	15	0	182_3_6_19-Oct	0	0	0	0.5
182	3	7	bottom	NA	19	10	19-Oct	2017	18/12/2017	29	22	24	2	NA	202	15	0	182_3_7_19-Oct	0	0	0	0.363636364
182	3	7	top	NA	19	10	19-Oct	2017	18/12/2017	29	14	15	1	NA	203	15	0	182_3_7_19-Oct	0	0	0	0.642857143
53	1	1	bottom	NA	19	10	19-Oct	2017	18/12/2017	29	13	16	3	NA	100	15	0	53_1_1_19-Oct	0	0	0	1
53	1	1	top	NA	19	10	19-Oct	2017	18/12/2017	29	12	15	3	NA	101	15	0	53_1_1_19-Oct	0	0	0	1
53	2	1	bottom	NA	19	10	19-Oct	2017	18/12/2017	29	19	20	1	NA	102	15	0	53_2_1_19-Oct	0	0	0	1
53	2	1	top	NA	19	10	19-Oct	2017	18/12/2017	29	19	19	0	NA	103	15	0	53_2_1_19-Oct	0	0	0	1
53	3	1	bottom	NA	19	10	19-Oct	2017	18/12/2017	29	11	14	3	NA	104	15	0	53_3_1_19-Oct	0	0	0	0.727272727
53	3	1	top	NA	19	10	19-Oct	2017	18/12/2017	29	12	13	1	NA	105	15	0	53_3_1_19-Oct	0	0	0	0.75
53	4	1	bottom	NA	19	10	19-Oct	2017	18/12/2017	29	3	19	16	NA	106	15	0	53_4_1_19-Oct	0	0	0	1
53	4	1	top	NA	19	10	19-Oct	2017	18/12/2017	29	5	12	7	NA	107	15	2	53_4_1_19-Oct	16.66666667	40	0.4	0.8
53	5	1	bottom	NA	19	10	19-Oct	2017	18/12/2017	29	21	23	2	NA	108	15	0	53_5_1_19-Oct	0	0	0	1
53	5	1	top	NA	19	10	19-Oct	2017	18/12/2017	29	17	17	0	NA	109	15	0	53_5_1_19-Oct	0	0	0	1
53	6	1	bottom	NA	19	10	19-Oct	2017	18/12/2017	29	3	10	7	NA	110	15	0	53_6_1_19-Oct	0	0	0	1
53	6	1	top	NA	19	10	19-Oct	2017	18/12/2017	29	9	11	2	NA	111	15	0	53_6_1_19-Oct	0	0	0	1
53	7	1	bottom	NA	19	10	19-Oct	2017	18/12/2017	29	18	22	4	NA	112	15	0	53_7_1_19-Oct	0	0	0	1
53	7	1	top	NA	19	10	19-Oct	2017	18/12/2017	29	17	17	0	NA	113	15	0	53_7_1_19-Oct	0	0	0	1
53	8	1	bottom	NA	19	10	19-Oct	2017	18/12/2017	29	21	22	1	NA	114	15	0	53_8_1_19-Oct	0	0	0	1
53	8	1	top	NA	19	10	19-Oct	2017	18/12/2017	29	20	20	0	NA	115	15	0	53_8_1_19-Oct	0	0	0	1
53	9	1	bottom	NA	19	10	19-Oct	2017	18/12/2017	29	10	18	8	NA	116	15	0	53_9_1_19-Oct	0	0	0	1
53	9	1	top	NA	19	10	19-Oct	2017	18/12/2017	29	11	12	1	NA	117	15	0	53_9_1_19-Oct	0	0	0	1
53	10	1	bottom	NA	19	10	19-Oct	2017	18/12/2017	29	6	22	16	NA	118	15	0	53_10_1_19-Oct	0	0	0	1
53	10	1	top	NA	19	10	19-Oct	2017	18/12/2017	29	14	14	0	NA	119	15	0	53_10_1_19-Oct	0	0	0	0.928571429
182	1	1	bottom	NA	19	10	19-Oct	2017	18/12/2017	29	15	15	0	NA	160	16	0	182_1_1_19-Oct	0	0	0	0.8
182	1	1	top	NA	19	10	19-Oct	2017	18/12/2017	29	6	6	0	NA	161	16	0	182_1_1_19-Oct	0	0	0	1
182	1	10	bottom	NA	19	10	19-Oct	2017	18/12/2017	29	9	12	3	NA	176	16	0	182_1_10_19-Oct	0	0	0	0.777777778
182	1	10	top	NA	19	10	19-Oct	2017	18/12/2017	29	6	6	0	NA	177	16	0	182_1_10_19-Oct	0	0	0	0.833333333
182	1	2	bottom	NA	19	10	19-Oct	2017	18/12/2017	29	22	22	0	NA	178	16	0	182_1_2_19-Oct	0	0	0	0.772727273
182	1	2	top	NA	19	10	19-Oct	2017	18/12/2017	29	10	10	0	NA	179	16	0	182_1_2_19-Oct	0	0	0	1
182	1	3	bottom	NA	19	10	19-Oct	2017	18/12/2017	29	19	19	0	NA	162	16	0	182_1_3_19-Oct	0	0	0	0.578947368
182	1	3	top	NA	19	10	19-Oct	2017	18/12/2017	29	5	5	0	NA	163	16	0	182_1_3_19-Oct	0	0	0	0.6
182	1	4	bottom	NA	19	10	19-Oct	2017	18/12/2017	29	8	9	1	NA	164	16	0	182_1_4_19-Oct	0	0	0	0.875
182	1	4	top	NA	19	10	19-Oct	2017	18/12/2017	29	5	6	1	NA	165	16	0	182_1_4_19-Oct	0	0	0	1
182	1	5	bottom	NA	19	10	19-Oct	2017	18/12/2017	29	16	22	6	NA	166	16	0	182_1_5_19-Oct	0	0	0	0.6875
182	1	5	top	NA	19	10	19-Oct	2017	18/12/2017	29	12	15	3	NA	167	16	0	182_1_5_19-Oct	0	0	0	0.833333333
182	1	6	bottom	NA	19	10	19-Oct	2017	18/12/2017	29	15	15	0	NA	168	16	0	182_1_6_19-Oct	0	0	0	0.666666667
182	1	6	top	NA	19	10	19-Oct	2017	18/12/2017	29	10	12	2	NA	169	16	0	182_1_6_19-Oct	0	0	0	0.6
182	1	7	bottom	NA	19	10	19-Oct	2017	18/12/2017	29	20	20	0	NA	170	16	0	182_1_7_19-Oct	0	0	0	0.45
182	1	7	top	NA	19	10	19-Oct	2017	18/12/2017	29	17	17	0	NA	171	16	0	182_1_7_19-Oct	0	0	0	0.764705882
182	1	8	bottom	NA	19	10	19-Oct	2017	18/12/2017	29	12	12	0	NA	172	16	0	182_1_8_19-Oct	0	0	0	0.75
182	1	8	top	NA	19	10	19-Oct	2017	18/12/2017	29	9	9	0	NA	173	16	0	182_1_8_19-Oct	0	0	0	1
182	1	9	bottom	NA	19	10	19-Oct	2017	18/12/2017	29	14	14	0	NA	174	16	0	182_1_9_19-Oct	0	0	0	0.642857143
182	1	9	top	NA	19	10	19-Oct	2017	18/12/2017	29	17	17	0	NA	175	16	0	182_1_9_19-Oct	0	0	0	1
182	2	1	bottom	NA	19	10	19-Oct	2017	18/12/2017	29	16	16	0	NA	180	16	0	182_2_1_19-Oct	0	0	0	1
182	2	1	top	NA	19	10	19-Oct	2017	18/12/2017	29	13	13	0	NA	181	16	0	182_2_1_19-Oct	0	0	0	0.923076923
182	2	3	bottom	NA	19	10	19-Oct	2017	18/12/2017	29	9	9	0	NA	182	16	0	182_2_3_19-Oct	0	0	0	1
182	2	3	top	NA	19	10	19-Oct	2017	18/12/2017	29	10	10	0	NA	183	16	0	182_2_3_19-Oct	0	0	0	1
182	2	4	bottom	NA	19	10	19-Oct	2017	18/12/2017	29	13	14	1	NA	184	16	0	182_2_4_19-Oct	0	0	0	1
182	2	4	top	NA	19	10	19-Oct	2017	18/12/2017	29	14	14	0	NA	185	16	0	182_2_4_19-Oct	0	0	0	0.857142857
182	2	5	bottom	NA	19	10	19-Oct	2017	18/12/2017	29	18	18	0	NA	186	16	0	182_2_5_19-Oct	0	0	0	1
182	2	5	top	NA	19	10	19-Oct	2017	18/12/2017	29	12	13	1	NA	187	16	0	182_2_5_19-Oct	0	0	0	1
182	2	6	bottom	NA	19	10	19-Oct	2017	18/12/2017	29	11	20	9	NA	188	16	0	182_2_6_19-Oct	0	0	0	0.454545455
182	2	6	top	NA	19	10	19-Oct	2017	18/12/2017	29	16	18	2	NA	189	16	0	182_2_6_19-Oct	0	0	0	0.4375
182	2	7	bottom	NA	19	10	19-Oct	2017	18/12/2017	29	11	21	10	NA	190	16	0	182_2_7_19-Oct	0	0	0	0.545454545
182	2	7	top	NA	19	10	19-Oct	2017	18/12/2017	29	11	14	3	NA	191	16	0	182_2_7_19-Oct	0	0	0	0.727272727
182	3	1	bottom	NA	19	10	19-Oct	2017	18/12/2017	29	9	12	3	NA	192	16	0	182_3_1_19-Oct	0	0	0	0.444444444
182	3	1	top	NA	19	10	19-Oct	2017	18/12/2017	29	7	7	0	NA	193	16	0	182_3_1_19-Oct	0	0	0	0.714285714
182	3	3	bottom	NA	19	10	19-Oct	2017	18/12/2017	29	9	13	4	NA	194	16	0	182_3_3_19-Oct	0	0	0	0.666666667
182	3	3	top	NA	19	10	19-Oct	2017	18/12/2017	29	7	7	0	NA	195	16	0	182_3_3_19-Oct	0	0	0	0.428571429
182	3	4	bottom	NA	19	10	19-Oct	2017	18/12/2017	29	5	5	0	NA	196	16	0	182_3_4_19-Oct	0	0	0	0.6
182	3	4	top	NA	19	10	19-Oct	2017	18/12/2017	29	13	13	0	NA	197	16	0	182_3_4_19-Oct	0	0	0	0.615384615
182	3	5	bottom	NA	19	10	19-Oct	2017	18/12/2017	29	13	13	0	NA	198	16	0	182_3_5_19-Oct	0	0	0	0.384615385
182	3	5	top	NA	19	10	19-Oct	2017	18/12/2017	29	10	10	0	NA	199	16	0	182_3_5_19-Oct	0	0	0	1
182	3	6	bottom	NA	19	10	19-Oct	2017	18/12/2017	29	8	9	1	NA	200	16	0	182_3_6_19-Oct	0	0	0	0.25
182	3	6	top	NA	19	10	19-Oct	2017	18/12/2017	29	6	7	1	NA	201	16	0	182_3_6_19-Oct	0	0	0	0.5
182	3	7	bottom	NA	19	10	19-Oct	2017	18/12/2017	29	22	24	2	NA	202	16	0	182_3_7_19-Oct	0	0	0	0.363636364
182	3	7	top	NA	19	10	19-Oct	2017	18/12/2017	29	14	15	1	NA	203	16	0	182_3_7_19-Oct	0	0	0	0.642857143
53	1	1	bottom	NA	19	10	19-Oct	2017	18/12/2017	29	13	16	3	NA	100	16	0	53_1_1_19-Oct	0	0	0	1
53	1	1	top	NA	19	10	19-Oct	2017	18/12/2017	29	12	15	3	NA	101	16	0	53_1_1_19-Oct	0	0	0	1
53	2	1	bottom	NA	19	10	19-Oct	2017	18/12/2017	29	19	20	1	NA	102	16	0	53_2_1_19-Oct	0	0	0	1
53	2	1	top	NA	19	10	19-Oct	2017	18/12/2017	29	19	19	0	NA	103	16	0	53_2_1_19-Oct	0	0	0	1
53	3	1	bottom	NA	19	10	19-Oct	2017	18/12/2017	29	11	14	3	NA	104	16	0	53_3_1_19-Oct	0	0	0	0.727272727
53	3	1	top	NA	19	10	19-Oct	2017	18/12/2017	29	12	13	1	NA	105	16	0	53_3_1_19-Oct	0	0	0	0.75
53	4	1	bottom	NA	19	10	19-Oct	2017	18/12/2017	29	3	19	16	NA	106	16	0	53_4_1_19-Oct	0	0	0	1
53	4	1	top	NA	19	10	19-Oct	2017	18/12/2017	29	5	12	7	NA	107	16	0	53_4_1_19-Oct	0	0	0	0.8
53	5	1	bottom	NA	19	10	19-Oct	2017	18/12/2017	29	21	23	2	NA	108	16	0	53_5_1_19-Oct	0	0	0	1
53	5	1	top	NA	19	10	19-Oct	2017	18/12/2017	29	17	17	0	NA	109	16	0	53_5_1_19-Oct	0	0	0	1
53	6	1	bottom	NA	19	10	19-Oct	2017	18/12/2017	29	3	10	7	NA	110	16	0	53_6_1_19-Oct	0	0	0	1
53	6	1	top	NA	19	10	19-Oct	2017	18/12/2017	29	9	11	2	NA	111	16	0	53_6_1_19-Oct	0	0	0	1
53	7	1	bottom	NA	19	10	19-Oct	2017	18/12/2017	29	18	22	4	NA	112	16	0	53_7_1_19-Oct	0	0	0	1
53	7	1	top	NA	19	10	19-Oct	2017	18/12/2017	29	17	17	0	NA	113	16	0	53_7_1_19-Oct	0	0	0	1
53	8	1	bottom	NA	19	10	19-Oct	2017	18/12/2017	29	21	22	1	NA	114	16	0	53_8_1_19-Oct	0	0	0	1
53	8	1	top	NA	19	10	19-Oct	2017	18/12/2017	29	20	20	0	NA	115	16	0	53_8_1_19-Oct	0	0	0	1
53	9	1	bottom	NA	19	10	19-Oct	2017	18/12/2017	29	10	18	8	NA	116	16	0	53_9_1_19-Oct	0	0	0	1
53	9	1	top	NA	19	10	19-Oct	2017	18/12/2017	29	11	12	1	NA	117	16	0	53_9_1_19-Oct	0	0	0	1
53	10	1	bottom	NA	19	10	19-Oct	2017	18/12/2017	29	6	22	16	NA	118	16	0	53_10_1_19-Oct	0	0	0	1
53	10	1	top	NA	19	10	19-Oct	2017	18/12/2017	29	14	14	0	NA	119	16	0	53_10_1_19-Oct	0	0	0	0.928571429
182	1	1	bottom	NA	19	10	19-Oct	2017	18/12/2017	29	15	15	0	NA	160	17	0	182_1_1_19-Oct	0	0	0	0.8
182	1	1	top	NA	19	10	19-Oct	2017	18/12/2017	29	6	6	0	NA	161	17	0	182_1_1_19-Oct	0	0	0	1
182	1	10	bottom	NA	19	10	19-Oct	2017	18/12/2017	29	9	12	3	NA	176	17	0	182_1_10_19-Oct	0	0	0	0.777777778
182	1	10	top	NA	19	10	19-Oct	2017	18/12/2017	29	6	6	0	NA	177	17	0	182_1_10_19-Oct	0	0	0	0.833333333
182	1	2	bottom	NA	19	10	19-Oct	2017	18/12/2017	29	22	22	0	NA	178	17	0	182_1_2_19-Oct	0	0	0	0.772727273
182	1	2	top	NA	19	10	19-Oct	2017	18/12/2017	29	10	10	0	NA	179	17	0	182_1_2_19-Oct	0	0	0	1
182	1	3	bottom	NA	19	10	19-Oct	2017	18/12/2017	29	19	19	0	NA	162	17	0	182_1_3_19-Oct	0	0	0	0.578947368
182	1	3	top	NA	19	10	19-Oct	2017	18/12/2017	29	5	5	0	NA	163	17	0	182_1_3_19-Oct	0	0	0	0.6
182	1	4	bottom	NA	19	10	19-Oct	2017	18/12/2017	29	8	9	1	NA	164	17	0	182_1_4_19-Oct	0	0	0	0.875
182	1	4	top	NA	19	10	19-Oct	2017	18/12/2017	29	5	6	1	NA	165	17	0	182_1_4_19-Oct	0	0	0	1
182	1	5	bottom	NA	19	10	19-Oct	2017	18/12/2017	29	16	22	6	NA	166	17	0	182_1_5_19-Oct	0	0	0	0.6875
182	1	5	top	NA	19	10	19-Oct	2017	18/12/2017	29	12	15	3	NA	167	17	0	182_1_5_19-Oct	0	0	0	0.833333333
182	1	6	bottom	NA	19	10	19-Oct	2017	18/12/2017	29	15	15	0	NA	168	17	0	182_1_6_19-Oct	0	0	0	0.666666667
182	1	6	top	NA	19	10	19-Oct	2017	18/12/2017	29	10	12	2	NA	169	17	0	182_1_6_19-Oct	0	0	0	0.6
182	1	7	bottom	NA	19	10	19-Oct	2017	18/12/2017	29	20	20	0	NA	170	17	0	182_1_7_19-Oct	0	0	0	0.45
182	1	7	top	NA	19	10	19-Oct	2017	18/12/2017	29	17	17	0	NA	171	17	1	182_1_7_19-Oct	5.882352941	5.882352941	0.058823529	0.823529412
182	1	8	bottom	NA	19	10	19-Oct	2017	18/12/2017	29	12	12	0	NA	172	17	0	182_1_8_19-Oct	0	0	0	0.75
182	1	8	top	NA	19	10	19-Oct	2017	18/12/2017	29	9	9	0	NA	173	17	0	182_1_8_19-Oct	0	0	0	1
182	1	9	bottom	NA	19	10	19-Oct	2017	18/12/2017	29	14	14	0	NA	174	17	0	182_1_9_19-Oct	0	0	0	0.642857143
182	1	9	top	NA	19	10	19-Oct	2017	18/12/2017	29	17	17	0	NA	175	17	0	182_1_9_19-Oct	0	0	0	1
182	2	1	bottom	NA	19	10	19-Oct	2017	18/12/2017	29	16	16	0	NA	180	17	0	182_2_1_19-Oct	0	0	0	1
182	2	1	top	NA	19	10	19-Oct	2017	18/12/2017	29	13	13	0	NA	181	17	0	182_2_1_19-Oct	0	0	0	0.923076923
182	2	3	bottom	NA	19	10	19-Oct	2017	18/12/2017	29	9	9	0	NA	182	17	0	182_2_3_19-Oct	0	0	0	1
182	2	3	top	NA	19	10	19-Oct	2017	18/12/2017	29	10	10	0	NA	183	17	0	182_2_3_19-Oct	0	0	0	1
182	2	4	bottom	NA	19	10	19-Oct	2017	18/12/2017	29	13	14	1	NA	184	17	0	182_2_4_19-Oct	0	0	0	1
182	2	4	top	NA	19	10	19-Oct	2017	18/12/2017	29	14	14	0	NA	185	17	0	182_2_4_19-Oct	0	0	0	0.857142857
182	2	5	bottom	NA	19	10	19-Oct	2017	18/12/2017	29	18	18	0	NA	186	17	0	182_2_5_19-Oct	0	0	0	1
182	2	5	top	NA	19	10	19-Oct	2017	18/12/2017	29	12	13	1	NA	187	17	0	182_2_5_19-Oct	0	0	0	1
182	2	6	bottom	NA	19	10	19-Oct	2017	18/12/2017	29	11	20	9	NA	188	17	0	182_2_6_19-Oct	0	0	0	0.454545455
182	2	6	top	NA	19	10	19-Oct	2017	18/12/2017	29	16	18	2	NA	189	17	0	182_2_6_19-Oct	0	0	0	0.4375
182	2	7	bottom	NA	19	10	19-Oct	2017	18/12/2017	29	11	21	10	NA	190	17	0	182_2_7_19-Oct	0	0	0	0.545454545
182	2	7	top	NA	19	10	19-Oct	2017	18/12/2017	29	11	14	3	NA	191	17	0	182_2_7_19-Oct	0	0	0	0.727272727
182	3	1	bottom	NA	19	10	19-Oct	2017	18/12/2017	29	9	12	3	NA	192	17	0	182_3_1_19-Oct	0	0	0	0.444444444
182	3	1	top	NA	19	10	19-Oct	2017	18/12/2017	29	7	7	0	NA	193	17	0	182_3_1_19-Oct	0	0	0	0.714285714
182	3	3	bottom	NA	19	10	19-Oct	2017	18/12/2017	29	9	13	4	NA	194	17	0	182_3_3_19-Oct	0	0	0	0.666666667
182	3	3	top	NA	19	10	19-Oct	2017	18/12/2017	29	7	7	0	NA	195	17	0	182_3_3_19-Oct	0	0	0	0.428571429
182	3	4	bottom	NA	19	10	19-Oct	2017	18/12/2017	29	5	5	0	NA	196	17	0	182_3_4_19-Oct	0	0	0	0.6
182	3	4	top	NA	19	10	19-Oct	2017	18/12/2017	29	13	13	0	NA	197	17	0	182_3_4_19-Oct	0	0	0	0.615384615
182	3	5	bottom	NA	19	10	19-Oct	2017	18/12/2017	29	13	13	0	NA	198	17	0	182_3_5_19-Oct	0	0	0	0.384615385
182	3	5	top	NA	19	10	19-Oct	2017	18/12/2017	29	10	10	0	NA	199	17	0	182_3_5_19-Oct	0	0	0	1
182	3	6	bottom	NA	19	10	19-Oct	2017	18/12/2017	29	8	9	1	NA	200	17	0	182_3_6_19-Oct	0	0	0	0.25
182	3	6	top	NA	19	10	19-Oct	2017	18/12/2017	29	6	7	1	NA	201	17	0	182_3_6_19-Oct	0	0	0	0.5
182	3	7	bottom	NA	19	10	19-Oct	2017	18/12/2017	29	22	24	2	NA	202	17	0	182_3_7_19-Oct	0	0	0	0.363636364
182	3	7	top	NA	19	10	19-Oct	2017	18/12/2017	29	14	15	1	NA	203	17	0	182_3_7_19-Oct	0	0	0	0.642857143
53	1	1	bottom	NA	19	10	19-Oct	2017	18/12/2017	29	13	16	3	NA	100	17	0	53_1_1_19-Oct	0	0	0	1
53	1	1	top	NA	19	10	19-Oct	2017	18/12/2017	29	12	15	3	NA	101	17	0	53_1_1_19-Oct	0	0	0	1
53	2	1	bottom	NA	19	10	19-Oct	2017	18/12/2017	29	19	20	1	NA	102	17	0	53_2_1_19-Oct	0	0	0	1
53	2	1	top	NA	19	10	19-Oct	2017	18/12/2017	29	19	19	0	NA	103	17	0	53_2_1_19-Oct	0	0	0	1
53	3	1	bottom	NA	19	10	19-Oct	2017	18/12/2017	29	11	14	3	NA	104	17	0	53_3_1_19-Oct	0	0	0	0.727272727
53	3	1	top	NA	19	10	19-Oct	2017	18/12/2017	29	12	13	1	NA	105	17	0	53_3_1_19-Oct	0	0	0	0.75
53	4	1	bottom	NA	19	10	19-Oct	2017	18/12/2017	29	3	19	16	NA	106	17	0	53_4_1_19-Oct	0	0	0	1
53	4	1	top	NA	19	10	19-Oct	2017	18/12/2017	29	5	12	7	NA	107	17	0	53_4_1_19-Oct	0	0	0	0.8
53	5	1	bottom	NA	19	10	19-Oct	2017	18/12/2017	29	21	23	2	NA	108	17	0	53_5_1_19-Oct	0	0	0	1
53	5	1	top	NA	19	10	19-Oct	2017	18/12/2017	29	17	17	0	NA	109	17	0	53_5_1_19-Oct	0	0	0	1
53	6	1	bottom	NA	19	10	19-Oct	2017	18/12/2017	29	3	10	7	NA	110	17	0	53_6_1_19-Oct	0	0	0	1
53	6	1	top	NA	19	10	19-Oct	2017	18/12/2017	29	9	11	2	NA	111	17	0	53_6_1_19-Oct	0	0	0	1
53	7	1	bottom	NA	19	10	19-Oct	2017	18/12/2017	29	18	22	4	NA	112	17	0	53_7_1_19-Oct	0	0	0	1
53	7	1	top	NA	19	10	19-Oct	2017	18/12/2017	29	17	17	0	NA	113	17	0	53_7_1_19-Oct	0	0	0	1
53	8	1	bottom	NA	19	10	19-Oct	2017	18/12/2017	29	21	22	1	NA	114	17	0	53_8_1_19-Oct	0	0	0	1
53	8	1	top	NA	19	10	19-Oct	2017	18/12/2017	29	20	20	0	NA	115	17	0	53_8_1_19-Oct	0	0	0	1
53	9	1	bottom	NA	19	10	19-Oct	2017	18/12/2017	29	10	18	8	NA	116	17	0	53_9_1_19-Oct	0	0	0	1
53	9	1	top	NA	19	10	19-Oct	2017	18/12/2017	29	11	12	1	NA	117	17	0	53_9_1_19-Oct	0	0	0	1
53	10	1	bottom	NA	19	10	19-Oct	2017	18/12/2017	29	6	22	16	NA	118	17	0	53_10_1_19-Oct	0	0	0	1
53	10	1	top	NA	19	10	19-Oct	2017	18/12/2017	29	14	14	0	NA	119	17	0	53_10_1_19-Oct	0	0	0	0.928571429
182	1	1	bottom	NA	19	10	19-Oct	2017	18/12/2017	29	15	15	0	NA	160	18	1	182_1_1_19-Oct	6.666666667	6.666666667	0.066666667	0.866666667
182	1	1	top	NA	19	10	19-Oct	2017	18/12/2017	29	6	6	0	NA	161	18	0	182_1_1_19-Oct	0	0	0	1
182	1	10	bottom	NA	19	10	19-Oct	2017	18/12/2017	29	9	12	3	NA	176	18	0	182_1_10_19-Oct	0	0	0	0.777777778
182	1	10	top	NA	19	10	19-Oct	2017	18/12/2017	29	6	6	0	NA	177	18	0	182_1_10_19-Oct	0	0	0	0.833333333
182	1	2	bottom	NA	19	10	19-Oct	2017	18/12/2017	29	22	22	0	NA	178	18	0	182_1_2_19-Oct	0	0	0	0.772727273
182	1	2	top	NA	19	10	19-Oct	2017	18/12/2017	29	10	10	0	NA	179	18	0	182_1_2_19-Oct	0	0	0	1
182	1	3	bottom	NA	19	10	19-Oct	2017	18/12/2017	29	19	19	0	NA	162	18	0	182_1_3_19-Oct	0	0	0	0.578947368
182	1	3	top	NA	19	10	19-Oct	2017	18/12/2017	29	5	5	0	NA	163	18	0	182_1_3_19-Oct	0	0	0	0.6
182	1	4	bottom	NA	19	10	19-Oct	2017	18/12/2017	29	8	9	1	NA	164	18	0	182_1_4_19-Oct	0	0	0	0.875
182	1	4	top	NA	19	10	19-Oct	2017	18/12/2017	29	5	6	1	NA	165	18	0	182_1_4_19-Oct	0	0	0	1
182	1	5	bottom	NA	19	10	19-Oct	2017	18/12/2017	29	16	22	6	NA	166	18	0	182_1_5_19-Oct	0	0	0	0.6875
182	1	5	top	NA	19	10	19-Oct	2017	18/12/2017	29	12	15	3	NA	167	18	0	182_1_5_19-Oct	0	0	0	0.833333333
182	1	6	bottom	NA	19	10	19-Oct	2017	18/12/2017	29	15	15	0	NA	168	18	0	182_1_6_19-Oct	0	0	0	0.666666667
182	1	6	top	NA	19	10	19-Oct	2017	18/12/2017	29	10	12	2	NA	169	18	0	182_1_6_19-Oct	0	0	0	0.6
182	1	7	bottom	NA	19	10	19-Oct	2017	18/12/2017	29	20	20	0	NA	170	18	1	182_1_7_19-Oct	5	5	0.05	0.5
182	1	7	top	NA	19	10	19-Oct	2017	18/12/2017	29	17	17	0	NA	171	18	0	182_1_7_19-Oct	0	0	0	0.823529412
182	1	8	bottom	NA	19	10	19-Oct	2017	18/12/2017	29	12	12	0	NA	172	18	0	182_1_8_19-Oct	0	0	0	0.75
182	1	8	top	NA	19	10	19-Oct	2017	18/12/2017	29	9	9	0	NA	173	18	0	182_1_8_19-Oct	0	0	0	1
182	1	9	bottom	NA	19	10	19-Oct	2017	18/12/2017	29	14	14	0	NA	174	18	0	182_1_9_19-Oct	0	0	0	0.642857143
182	1	9	top	NA	19	10	19-Oct	2017	18/12/2017	29	17	17	0	NA	175	18	0	182_1_9_19-Oct	0	0	0	1
182	2	1	bottom	NA	19	10	19-Oct	2017	18/12/2017	29	16	16	0	NA	180	18	0	182_2_1_19-Oct	0	0	0	1
182	2	1	top	NA	19	10	19-Oct	2017	18/12/2017	29	13	13	0	NA	181	18	0	182_2_1_19-Oct	0	0	0	0.923076923
182	2	3	bottom	NA	19	10	19-Oct	2017	18/12/2017	29	9	9	0	NA	182	18	0	182_2_3_19-Oct	0	0	0	1
182	2	3	top	NA	19	10	19-Oct	2017	18/12/2017	29	10	10	0	NA	183	18	0	182_2_3_19-Oct	0	0	0	1
182	2	4	bottom	NA	19	10	19-Oct	2017	18/12/2017	29	13	14	1	NA	184	18	0	182_2_4_19-Oct	0	0	0	1
182	2	4	top	NA	19	10	19-Oct	2017	18/12/2017	29	14	14	0	NA	185	18	1	182_2_4_19-Oct	7.142857143	7.142857143	0.071428571	0.928571429
182	2	5	bottom	NA	19	10	19-Oct	2017	18/12/2017	29	18	18	0	NA	186	18	0	182_2_5_19-Oct	0	0	0	1
182	2	5	top	NA	19	10	19-Oct	2017	18/12/2017	29	12	13	1	NA	187	18	0	182_2_5_19-Oct	0	0	0	1
182	2	6	bottom	NA	19	10	19-Oct	2017	18/12/2017	29	11	20	9	NA	188	18	0	182_2_6_19-Oct	0	0	0	0.454545455
182	2	6	top	NA	19	10	19-Oct	2017	18/12/2017	29	16	18	2	NA	189	18	0	182_2_6_19-Oct	0	0	0	0.4375
182	2	7	bottom	NA	19	10	19-Oct	2017	18/12/2017	29	11	21	10	NA	190	18	0	182_2_7_19-Oct	0	0	0	0.545454545
182	2	7	top	NA	19	10	19-Oct	2017	18/12/2017	29	11	14	3	NA	191	18	0	182_2_7_19-Oct	0	0	0	0.727272727
182	3	1	bottom	NA	19	10	19-Oct	2017	18/12/2017	29	9	12	3	NA	192	18	0	182_3_1_19-Oct	0	0	0	0.444444444
182	3	1	top	NA	19	10	19-Oct	2017	18/12/2017	29	7	7	0	NA	193	18	0	182_3_1_19-Oct	0	0	0	0.714285714
182	3	3	bottom	NA	19	10	19-Oct	2017	18/12/2017	29	9	13	4	NA	194	18	0	182_3_3_19-Oct	0	0	0	0.666666667
182	3	3	top	NA	19	10	19-Oct	2017	18/12/2017	29	7	7	0	NA	195	18	0	182_3_3_19-Oct	0	0	0	0.428571429
182	3	4	bottom	NA	19	10	19-Oct	2017	18/12/2017	29	5	5	0	NA	196	18	0	182_3_4_19-Oct	0	0	0	0.6
182	3	4	top	NA	19	10	19-Oct	2017	18/12/2017	29	13	13	0	NA	197	18	0	182_3_4_19-Oct	0	0	0	0.615384615
182	3	5	bottom	NA	19	10	19-Oct	2017	18/12/2017	29	13	13	0	NA	198	18	0	182_3_5_19-Oct	0	0	0	0.384615385
182	3	5	top	NA	19	10	19-Oct	2017	18/12/2017	29	10	10	0	NA	199	18	0	182_3_5_19-Oct	0	0	0	1
182	3	6	bottom	NA	19	10	19-Oct	2017	18/12/2017	29	8	9	1	NA	200	18	0	182_3_6_19-Oct	0	0	0	0.25
182	3	6	top	NA	19	10	19-Oct	2017	18/12/2017	29	6	7	1	NA	201	18	0	182_3_6_19-Oct	0	0	0	0.5
182	3	7	bottom	NA	19	10	19-Oct	2017	18/12/2017	29	22	24	2	NA	202	18	0	182_3_7_19-Oct	0	0	0	0.363636364
182	3	7	top	NA	19	10	19-Oct	2017	18/12/2017	29	14	15	1	NA	203	18	0	182_3_7_19-Oct	0	0	0	0.642857143
53	1	1	bottom	NA	19	10	19-Oct	2017	18/12/2017	29	13	16	3	NA	100	18	0	53_1_1_19-Oct	0	0	0	1
53	1	1	top	NA	19	10	19-Oct	2017	18/12/2017	29	12	15	3	NA	101	18	0	53_1_1_19-Oct	0	0	0	1
53	2	1	bottom	NA	19	10	19-Oct	2017	18/12/2017	29	19	20	1	NA	102	18	0	53_2_1_19-Oct	0	0	0	1
53	2	1	top	NA	19	10	19-Oct	2017	18/12/2017	29	19	19	0	NA	103	18	0	53_2_1_19-Oct	0	0	0	1
53	3	1	bottom	NA	19	10	19-Oct	2017	18/12/2017	29	11	14	3	NA	104	18	0	53_3_1_19-Oct	0	0	0	0.727272727
53	3	1	top	NA	19	10	19-Oct	2017	18/12/2017	29	12	13	1	NA	105	18	0	53_3_1_19-Oct	0	0	0	0.75
53	4	1	bottom	NA	19	10	19-Oct	2017	18/12/2017	29	3	19	16	NA	106	18	0	53_4_1_19-Oct	0	0	0	1
53	4	1	top	NA	19	10	19-Oct	2017	18/12/2017	29	5	12	7	NA	107	18	0	53_4_1_19-Oct	0	0	0	0.8
53	5	1	bottom	NA	19	10	19-Oct	2017	18/12/2017	29	21	23	2	NA	108	18	0	53_5_1_19-Oct	0	0	0	1
53	5	1	top	NA	19	10	19-Oct	2017	18/12/2017	29	17	17	0	NA	109	18	0	53_5_1_19-Oct	0	0	0	1
53	6	1	bottom	NA	19	10	19-Oct	2017	18/12/2017	29	3	10	7	NA	110	18	0	53_6_1_19-Oct	0	0	0	1
53	6	1	top	NA	19	10	19-Oct	2017	18/12/2017	29	9	11	2	NA	111	18	0	53_6_1_19-Oct	0	0	0	1
53	7	1	bottom	NA	19	10	19-Oct	2017	18/12/2017	29	18	22	4	NA	112	18	0	53_7_1_19-Oct	0	0	0	1
53	7	1	top	NA	19	10	19-Oct	2017	18/12/2017	29	17	17	0	NA	113	18	0	53_7_1_19-Oct	0	0	0	1
53	8	1	bottom	NA	19	10	19-Oct	2017	18/12/2017	29	21	22	1	NA	114	18	0	53_8_1_19-Oct	0	0	0	1
53	8	1	top	NA	19	10	19-Oct	2017	18/12/2017	29	20	20	0	NA	115	18	0	53_8_1_19-Oct	0	0	0	1
53	9	1	bottom	NA	19	10	19-Oct	2017	18/12/2017	29	10	18	8	NA	116	18	0	53_9_1_19-Oct	0	0	0	1
53	9	1	top	NA	19	10	19-Oct	2017	18/12/2017	29	11	12	1	NA	117	18	0	53_9_1_19-Oct	0	0	0	1
53	10	1	bottom	NA	19	10	19-Oct	2017	18/12/2017	29	6	22	16	NA	118	18	0	53_10_1_19-Oct	0	0	0	1
53	10	1	top	NA	19	10	19-Oct	2017	18/12/2017	29	14	14	0	NA	119	18	0	53_10_1_19-Oct	0	0	0	0.928571429
182	1	1	bottom	NA	19	10	19-Oct	2017	18/12/2017	29	15	15	0	NA	160	19	0	182_1_1_19-Oct	0	0	0	0.866666667
182	1	1	top	NA	19	10	19-Oct	2017	18/12/2017	29	6	6	0	NA	161	19	0	182_1_1_19-Oct	0	0	0	1
182	1	10	bottom	NA	19	10	19-Oct	2017	18/12/2017	29	9	12	3	NA	176	19	0	182_1_10_19-Oct	0	0	0	0.777777778
182	1	10	top	NA	19	10	19-Oct	2017	18/12/2017	29	6	6	0	NA	177	19	0	182_1_10_19-Oct	0	0	0	0.833333333
182	1	2	bottom	NA	19	10	19-Oct	2017	18/12/2017	29	22	22	0	NA	178	19	0	182_1_2_19-Oct	0	0	0	0.772727273
182	1	2	top	NA	19	10	19-Oct	2017	18/12/2017	29	10	10	0	NA	179	19	0	182_1_2_19-Oct	0	0	0	1
182	1	3	bottom	NA	19	10	19-Oct	2017	18/12/2017	29	19	19	0	NA	162	19	0	182_1_3_19-Oct	0	0	0	0.578947368
182	1	3	top	NA	19	10	19-Oct	2017	18/12/2017	29	5	5	0	NA	163	19	0	182_1_3_19-Oct	0	0	0	0.6
182	1	4	bottom	NA	19	10	19-Oct	2017	18/12/2017	29	8	9	1	NA	164	19	0	182_1_4_19-Oct	0	0	0	0.875
182	1	4	top	NA	19	10	19-Oct	2017	18/12/2017	29	5	6	1	NA	165	19	0	182_1_4_19-Oct	0	0	0	1
182	1	5	bottom	NA	19	10	19-Oct	2017	18/12/2017	29	16	22	6	NA	166	19	0	182_1_5_19-Oct	0	0	0	0.6875
182	1	5	top	NA	19	10	19-Oct	2017	18/12/2017	29	12	15	3	NA	167	19	0	182_1_5_19-Oct	0	0	0	0.833333333
182	1	6	bottom	NA	19	10	19-Oct	2017	18/12/2017	29	15	15	0	NA	168	19	0	182_1_6_19-Oct	0	0	0	0.666666667
182	1	6	top	NA	19	10	19-Oct	2017	18/12/2017	29	10	12	2	NA	169	19	0	182_1_6_19-Oct	0	0	0	0.6
182	1	7	bottom	NA	19	10	19-Oct	2017	18/12/2017	29	20	20	0	NA	170	19	0	182_1_7_19-Oct	0	0	0	0.5
182	1	7	top	NA	19	10	19-Oct	2017	18/12/2017	29	17	17	0	NA	171	19	0	182_1_7_19-Oct	0	0	0	0.823529412
182	1	8	bottom	NA	19	10	19-Oct	2017	18/12/2017	29	12	12	0	NA	172	19	0	182_1_8_19-Oct	0	0	0	0.75
182	1	8	top	NA	19	10	19-Oct	2017	18/12/2017	29	9	9	0	NA	173	19	0	182_1_8_19-Oct	0	0	0	1
182	1	9	bottom	NA	19	10	19-Oct	2017	18/12/2017	29	14	14	0	NA	174	19	0	182_1_9_19-Oct	0	0	0	0.642857143
182	1	9	top	NA	19	10	19-Oct	2017	18/12/2017	29	17	17	0	NA	175	19	0	182_1_9_19-Oct	0	0	0	1
182	2	1	bottom	NA	19	10	19-Oct	2017	18/12/2017	29	16	16	0	NA	180	19	0	182_2_1_19-Oct	0	0	0	1
182	2	1	top	NA	19	10	19-Oct	2017	18/12/2017	29	13	13	0	NA	181	19	0	182_2_1_19-Oct	0	0	0	0.923076923
182	2	3	bottom	NA	19	10	19-Oct	2017	18/12/2017	29	9	9	0	NA	182	19	0	182_2_3_19-Oct	0	0	0	1
182	2	3	top	NA	19	10	19-Oct	2017	18/12/2017	29	10	10	0	NA	183	19	0	182_2_3_19-Oct	0	0	0	1
182	2	4	bottom	NA	19	10	19-Oct	2017	18/12/2017	29	13	14	1	NA	184	19	0	182_2_4_19-Oct	0	0	0	1
182	2	4	top	NA	19	10	19-Oct	2017	18/12/2017	29	14	14	0	NA	185	19	0	182_2_4_19-Oct	0	0	0	0.928571429
182	2	5	bottom	NA	19	10	19-Oct	2017	18/12/2017	29	18	18	0	NA	186	19	0	182_2_5_19-Oct	0	0	0	1
182	2	5	top	NA	19	10	19-Oct	2017	18/12/2017	29	12	13	1	NA	187	19	0	182_2_5_19-Oct	0	0	0	1
182	2	6	bottom	NA	19	10	19-Oct	2017	18/12/2017	29	11	20	9	NA	188	19	0	182_2_6_19-Oct	0	0	0	0.454545455
182	2	6	top	NA	19	10	19-Oct	2017	18/12/2017	29	16	18	2	NA	189	19	0	182_2_6_19-Oct	0	0	0	0.4375
182	2	7	bottom	NA	19	10	19-Oct	2017	18/12/2017	29	11	21	10	NA	190	19	0	182_2_7_19-Oct	0	0	0	0.545454545
182	2	7	top	NA	19	10	19-Oct	2017	18/12/2017	29	11	14	3	NA	191	19	0	182_2_7_19-Oct	0	0	0	0.727272727
182	3	1	bottom	NA	19	10	19-Oct	2017	18/12/2017	29	9	12	3	NA	192	19	0	182_3_1_19-Oct	0	0	0	0.444444444
182	3	1	top	NA	19	10	19-Oct	2017	18/12/2017	29	7	7	0	NA	193	19	0	182_3_1_19-Oct	0	0	0	0.714285714
182	3	3	bottom	NA	19	10	19-Oct	2017	18/12/2017	29	9	13	4	NA	194	19	0	182_3_3_19-Oct	0	0	0	0.666666667
182	3	3	top	NA	19	10	19-Oct	2017	18/12/2017	29	7	7	0	NA	195	19	0	182_3_3_19-Oct	0	0	0	0.428571429
182	3	4	bottom	NA	19	10	19-Oct	2017	18/12/2017	29	5	5	0	NA	196	19	0	182_3_4_19-Oct	0	0	0	0.6
182	3	4	top	NA	19	10	19-Oct	2017	18/12/2017	29	13	13	0	NA	197	19	1	182_3_4_19-Oct	7.692307692	7.692307692	0.076923077	0.692307692
182	3	5	bottom	NA	19	10	19-Oct	2017	18/12/2017	29	13	13	0	NA	198	19	0	182_3_5_19-Oct	0	0	0	0.384615385
182	3	5	top	NA	19	10	19-Oct	2017	18/12/2017	29	10	10	0	NA	199	19	0	182_3_5_19-Oct	0	0	0	1
182	3	6	bottom	NA	19	10	19-Oct	2017	18/12/2017	29	8	9	1	NA	200	19	0	182_3_6_19-Oct	0	0	0	0.25
182	3	6	top	NA	19	10	19-Oct	2017	18/12/2017	29	6	7	1	NA	201	19	0	182_3_6_19-Oct	0	0	0	0.5
182	3	7	bottom	NA	19	10	19-Oct	2017	18/12/2017	29	22	24	2	NA	202	19	0	182_3_7_19-Oct	0	0	0	0.363636364
182	3	7	top	NA	19	10	19-Oct	2017	18/12/2017	29	14	15	1	NA	203	19	0	182_3_7_19-Oct	0	0	0	0.642857143
53	1	1	bottom	NA	19	10	19-Oct	2017	18/12/2017	29	13	16	3	NA	100	19	0	53_1_1_19-Oct	0	0	0	1
53	1	1	top	NA	19	10	19-Oct	2017	18/12/2017	29	12	15	3	NA	101	19	0	53_1_1_19-Oct	0	0	0	1
53	2	1	bottom	NA	19	10	19-Oct	2017	18/12/2017	29	19	20	1	NA	102	19	0	53_2_1_19-Oct	0	0	0	1
53	2	1	top	NA	19	10	19-Oct	2017	18/12/2017	29	19	19	0	NA	103	19	0	53_2_1_19-Oct	0	0	0	1
53	3	1	bottom	NA	19	10	19-Oct	2017	18/12/2017	29	11	14	3	NA	104	19	0	53_3_1_19-Oct	0	0	0	0.727272727
53	3	1	top	NA	19	10	19-Oct	2017	18/12/2017	29	12	13	1	NA	105	19	0	53_3_1_19-Oct	0	0	0	0.75
53	4	1	bottom	NA	19	10	19-Oct	2017	18/12/2017	29	3	19	16	NA	106	19	0	53_4_1_19-Oct	0	0	0	1
53	4	1	top	NA	19	10	19-Oct	2017	18/12/2017	29	5	12	7	NA	107	19	0	53_4_1_19-Oct	0	0	0	0.8
53	5	1	bottom	NA	19	10	19-Oct	2017	18/12/2017	29	21	23	2	NA	108	19	0	53_5_1_19-Oct	0	0	0	1
53	5	1	top	NA	19	10	19-Oct	2017	18/12/2017	29	17	17	0	NA	109	19	0	53_5_1_19-Oct	0	0	0	1
53	6	1	bottom	NA	19	10	19-Oct	2017	18/12/2017	29	3	10	7	NA	110	19	0	53_6_1_19-Oct	0	0	0	1
53	6	1	top	NA	19	10	19-Oct	2017	18/12/2017	29	9	11	2	NA	111	19	0	53_6_1_19-Oct	0	0	0	1
53	7	1	bottom	NA	19	10	19-Oct	2017	18/12/2017	29	18	22	4	NA	112	19	0	53_7_1_19-Oct	0	0	0	1
53	7	1	top	NA	19	10	19-Oct	2017	18/12/2017	29	17	17	0	NA	113	19	0	53_7_1_19-Oct	0	0	0	1
53	8	1	bottom	NA	19	10	19-Oct	2017	18/12/2017	29	21	22	1	NA	114	19	0	53_8_1_19-Oct	0	0	0	1
53	8	1	top	NA	19	10	19-Oct	2017	18/12/2017	29	20	20	0	NA	115	19	0	53_8_1_19-Oct	0	0	0	1
53	9	1	bottom	NA	19	10	19-Oct	2017	18/12/2017	29	10	18	8	NA	116	19	0	53_9_1_19-Oct	0	0	0	1
53	9	1	top	NA	19	10	19-Oct	2017	18/12/2017	29	11	12	1	NA	117	19	0	53_9_1_19-Oct	0	0	0	1
53	10	1	bottom	NA	19	10	19-Oct	2017	18/12/2017	29	6	22	16	NA	118	19	0	53_10_1_19-Oct	0	0	0	1
53	10	1	top	NA	19	10	19-Oct	2017	18/12/2017	29	14	14	0	NA	119	19	0	53_10_1_19-Oct	0	0	0	0.928571429
182	1	1	bottom	NA	19	10	19-Oct	2017	18/12/2017	29	15	15	0	NA	160	20	0	182_1_1_19-Oct	0	0	0	0.866666667
182	1	1	top	NA	19	10	19-Oct	2017	18/12/2017	29	6	6	0	NA	161	20	0	182_1_1_19-Oct	0	0	0	1
182	1	10	bottom	NA	19	10	19-Oct	2017	18/12/2017	29	9	12	3	NA	176	20	0	182_1_10_19-Oct	0	0	0	0.777777778
182	1	10	top	NA	19	10	19-Oct	2017	18/12/2017	29	6	6	0	NA	177	20	0	182_1_10_19-Oct	0	0	0	0.833333333
182	1	2	bottom	NA	19	10	19-Oct	2017	18/12/2017	29	22	22	0	NA	178	20	0	182_1_2_19-Oct	0	0	0	0.772727273
182	1	2	top	NA	19	10	19-Oct	2017	18/12/2017	29	10	10	0	NA	179	20	0	182_1_2_19-Oct	0	0	0	1
182	1	3	bottom	NA	19	10	19-Oct	2017	18/12/2017	29	19	19	0	NA	162	20	1	182_1_3_19-Oct	5.263157895	5.263157895	0.052631579	0.631578947
182	1	3	top	NA	19	10	19-Oct	2017	18/12/2017	29	5	5	0	NA	163	20	0	182_1_3_19-Oct	0	0	0	0.6
182	1	4	bottom	NA	19	10	19-Oct	2017	18/12/2017	29	8	9	1	NA	164	20	0	182_1_4_19-Oct	0	0	0	0.875
182	1	4	top	NA	19	10	19-Oct	2017	18/12/2017	29	5	6	1	NA	165	20	0	182_1_4_19-Oct	0	0	0	1
182	1	5	bottom	NA	19	10	19-Oct	2017	18/12/2017	29	16	22	6	NA	166	20	0	182_1_5_19-Oct	0	0	0	0.6875
182	1	5	top	NA	19	10	19-Oct	2017	18/12/2017	29	12	15	3	NA	167	20	0	182_1_5_19-Oct	0	0	0	0.833333333
182	1	6	bottom	NA	19	10	19-Oct	2017	18/12/2017	29	15	15	0	NA	168	20	0	182_1_6_19-Oct	0	0	0	0.666666667
182	1	6	top	NA	19	10	19-Oct	2017	18/12/2017	29	10	12	2	NA	169	20	0	182_1_6_19-Oct	0	0	0	0.6
182	1	7	bottom	NA	19	10	19-Oct	2017	18/12/2017	29	20	20	0	NA	170	20	0	182_1_7_19-Oct	0	0	0	0.5
182	1	7	top	NA	19	10	19-Oct	2017	18/12/2017	29	17	17	0	NA	171	20	0	182_1_7_19-Oct	0	0	0	0.823529412
182	1	8	bottom	NA	19	10	19-Oct	2017	18/12/2017	29	12	12	0	NA	172	20	0	182_1_8_19-Oct	0	0	0	0.75
182	1	8	top	NA	19	10	19-Oct	2017	18/12/2017	29	9	9	0	NA	173	20	0	182_1_8_19-Oct	0	0	0	1
182	1	9	bottom	NA	19	10	19-Oct	2017	18/12/2017	29	14	14	0	NA	174	20	0	182_1_9_19-Oct	0	0	0	0.642857143
182	1	9	top	NA	19	10	19-Oct	2017	18/12/2017	29	17	17	0	NA	175	20	0	182_1_9_19-Oct	0	0	0	1
182	2	1	bottom	NA	19	10	19-Oct	2017	18/12/2017	29	16	16	0	NA	180	20	0	182_2_1_19-Oct	0	0	0	1
182	2	1	top	NA	19	10	19-Oct	2017	18/12/2017	29	13	13	0	NA	181	20	0	182_2_1_19-Oct	0	0	0	0.923076923
182	2	3	bottom	NA	19	10	19-Oct	2017	18/12/2017	29	9	9	0	NA	182	20	0	182_2_3_19-Oct	0	0	0	1
182	2	3	top	NA	19	10	19-Oct	2017	18/12/2017	29	10	10	0	NA	183	20	0	182_2_3_19-Oct	0	0	0	1
182	2	4	bottom	NA	19	10	19-Oct	2017	18/12/2017	29	13	14	1	NA	184	20	0	182_2_4_19-Oct	0	0	0	1
182	2	4	top	NA	19	10	19-Oct	2017	18/12/2017	29	14	14	0	NA	185	20	0	182_2_4_19-Oct	0	0	0	0.928571429
182	2	5	bottom	NA	19	10	19-Oct	2017	18/12/2017	29	18	18	0	NA	186	20	0	182_2_5_19-Oct	0	0	0	1
182	2	5	top	NA	19	10	19-Oct	2017	18/12/2017	29	12	13	1	NA	187	20	0	182_2_5_19-Oct	0	0	0	1
182	2	6	bottom	NA	19	10	19-Oct	2017	18/12/2017	29	11	20	9	NA	188	20	0	182_2_6_19-Oct	0	0	0	0.454545455
182	2	6	top	NA	19	10	19-Oct	2017	18/12/2017	29	16	18	2	NA	189	20	0	182_2_6_19-Oct	0	0	0	0.4375
182	2	7	bottom	NA	19	10	19-Oct	2017	18/12/2017	29	11	21	10	NA	190	20	0	182_2_7_19-Oct	0	0	0	0.545454545
182	2	7	top	NA	19	10	19-Oct	2017	18/12/2017	29	11	14	3	NA	191	20	0	182_2_7_19-Oct	0	0	0	0.727272727
182	3	1	bottom	NA	19	10	19-Oct	2017	18/12/2017	29	9	12	3	NA	192	20	0	182_3_1_19-Oct	0	0	0	0.444444444
182	3	1	top	NA	19	10	19-Oct	2017	18/12/2017	29	7	7	0	NA	193	20	0	182_3_1_19-Oct	0	0	0	0.714285714
182	3	3	bottom	NA	19	10	19-Oct	2017	18/12/2017	29	9	13	4	NA	194	20	0	182_3_3_19-Oct	0	0	0	0.666666667
182	3	3	top	NA	19	10	19-Oct	2017	18/12/2017	29	7	7	0	NA	195	20	0	182_3_3_19-Oct	0	0	0	0.428571429
182	3	4	bottom	NA	19	10	19-Oct	2017	18/12/2017	29	5	5	0	NA	196	20	0	182_3_4_19-Oct	0	0	0	0.6
182	3	4	top	NA	19	10	19-Oct	2017	18/12/2017	29	13	13	0	NA	197	20	1	182_3_4_19-Oct	7.692307692	7.692307692	0.076923077	0.769230769
182	3	5	bottom	NA	19	10	19-Oct	2017	18/12/2017	29	13	13	0	NA	198	20	0	182_3_5_19-Oct	0	0	0	0.384615385
182	3	5	top	NA	19	10	19-Oct	2017	18/12/2017	29	10	10	0	NA	199	20	0	182_3_5_19-Oct	0	0	0	1
182	3	6	bottom	NA	19	10	19-Oct	2017	18/12/2017	29	8	9	1	NA	200	20	0	182_3_6_19-Oct	0	0	0	0.25
182	3	6	top	NA	19	10	19-Oct	2017	18/12/2017	29	6	7	1	NA	201	20	0	182_3_6_19-Oct	0	0	0	0.5
182	3	7	bottom	NA	19	10	19-Oct	2017	18/12/2017	29	22	24	2	NA	202	20	0	182_3_7_19-Oct	0	0	0	0.363636364
182	3	7	top	NA	19	10	19-Oct	2017	18/12/2017	29	14	15	1	NA	203	20	0	182_3_7_19-Oct	0	0	0	0.642857143
53	1	1	bottom	NA	19	10	19-Oct	2017	18/12/2017	29	13	16	3	NA	100	20	0	53_1_1_19-Oct	0	0	0	1
53	1	1	top	NA	19	10	19-Oct	2017	18/12/2017	29	12	15	3	NA	101	20	0	53_1_1_19-Oct	0	0	0	1
53	2	1	bottom	NA	19	10	19-Oct	2017	18/12/2017	29	19	20	1	NA	102	20	0	53_2_1_19-Oct	0	0	0	1
53	2	1	top	NA	19	10	19-Oct	2017	18/12/2017	29	19	19	0	NA	103	20	0	53_2_1_19-Oct	0	0	0	1
53	3	1	bottom	NA	19	10	19-Oct	2017	18/12/2017	29	11	14	3	NA	104	20	0	53_3_1_19-Oct	0	0	0	0.727272727
53	3	1	top	NA	19	10	19-Oct	2017	18/12/2017	29	12	13	1	NA	105	20	0	53_3_1_19-Oct	0	0	0	0.75
53	4	1	bottom	NA	19	10	19-Oct	2017	18/12/2017	29	3	19	16	NA	106	20	0	53_4_1_19-Oct	0	0	0	1
53	4	1	top	NA	19	10	19-Oct	2017	18/12/2017	29	5	12	7	NA	107	20	0	53_4_1_19-Oct	0	0	0	0.8
53	5	1	bottom	NA	19	10	19-Oct	2017	18/12/2017	29	21	23	2	NA	108	20	0	53_5_1_19-Oct	0	0	0	1
53	5	1	top	NA	19	10	19-Oct	2017	18/12/2017	29	17	17	0	NA	109	20	0	53_5_1_19-Oct	0	0	0	1
53	6	1	bottom	NA	19	10	19-Oct	2017	18/12/2017	29	3	10	7	NA	110	20	0	53_6_1_19-Oct	0	0	0	1
53	6	1	top	NA	19	10	19-Oct	2017	18/12/2017	29	9	11	2	NA	111	20	0	53_6_1_19-Oct	0	0	0	1
53	7	1	bottom	NA	19	10	19-Oct	2017	18/12/2017	29	18	22	4	NA	112	20	0	53_7_1_19-Oct	0	0	0	1
53	7	1	top	NA	19	10	19-Oct	2017	18/12/2017	29	17	17	0	NA	113	20	0	53_7_1_19-Oct	0	0	0	1
53	8	1	bottom	NA	19	10	19-Oct	2017	18/12/2017	29	21	22	1	NA	114	20	0	53_8_1_19-Oct	0	0	0	1
53	8	1	top	NA	19	10	19-Oct	2017	18/12/2017	29	20	20	0	NA	115	20	0	53_8_1_19-Oct	0	0	0	1
53	9	1	bottom	NA	19	10	19-Oct	2017	18/12/2017	29	10	18	8	NA	116	20	0	53_9_1_19-Oct	0	0	0	1
53	9	1	top	NA	19	10	19-Oct	2017	18/12/2017	29	11	12	1	NA	117	20	0	53_9_1_19-Oct	0	0	0	1
53	10	1	bottom	NA	19	10	19-Oct	2017	18/12/2017	29	6	22	16	NA	118	20	0	53_10_1_19-Oct	0	0	0	1
53	10	1	top	NA	19	10	19-Oct	2017	18/12/2017	29	14	14	0	NA	119	20	0	53_10_1_19-Oct	0	0	0	0.928571429
182	1	1	bottom	NA	19	10	19-Oct	2017	18/12/2017	29	15	15	0	NA	160	21	0	182_1_1_19-Oct	0	0	0	0.866666667
182	1	1	top	NA	19	10	19-Oct	2017	18/12/2017	29	6	6	0	NA	161	21	0	182_1_1_19-Oct	0	0	0	1
182	1	10	bottom	NA	19	10	19-Oct	2017	18/12/2017	29	9	12	3	NA	176	21	0	182_1_10_19-Oct	0	0	0	0.777777778
182	1	10	top	NA	19	10	19-Oct	2017	18/12/2017	29	6	6	0	NA	177	21	0	182_1_10_19-Oct	0	0	0	0.833333333
182	1	2	bottom	NA	19	10	19-Oct	2017	18/12/2017	29	22	22	0	NA	178	21	0	182_1_2_19-Oct	0	0	0	0.772727273
182	1	2	top	NA	19	10	19-Oct	2017	18/12/2017	29	10	10	0	NA	179	21	0	182_1_2_19-Oct	0	0	0	1
182	1	3	bottom	NA	19	10	19-Oct	2017	18/12/2017	29	19	19	0	NA	162	21	0	182_1_3_19-Oct	0	0	0	0.631578947
182	1	3	top	NA	19	10	19-Oct	2017	18/12/2017	29	5	5	0	NA	163	21	0	182_1_3_19-Oct	0	0	0	0.6
182	1	4	bottom	NA	19	10	19-Oct	2017	18/12/2017	29	8	9	1	NA	164	21	0	182_1_4_19-Oct	0	0	0	0.875
182	1	4	top	NA	19	10	19-Oct	2017	18/12/2017	29	5	6	1	NA	165	21	0	182_1_4_19-Oct	0	0	0	1
182	1	5	bottom	NA	19	10	19-Oct	2017	18/12/2017	29	16	22	6	NA	166	21	0	182_1_5_19-Oct	0	0	0	0.6875
182	1	5	top	NA	19	10	19-Oct	2017	18/12/2017	29	12	15	3	NA	167	21	0	182_1_5_19-Oct	0	0	0	0.833333333
182	1	6	bottom	NA	19	10	19-Oct	2017	18/12/2017	29	15	15	0	NA	168	21	0	182_1_6_19-Oct	0	0	0	0.666666667
182	1	6	top	NA	19	10	19-Oct	2017	18/12/2017	29	10	12	2	NA	169	21	0	182_1_6_19-Oct	0	0	0	0.6
182	1	7	bottom	NA	19	10	19-Oct	2017	18/12/2017	29	20	20	0	NA	170	21	1	182_1_7_19-Oct	5	5	0.05	0.55
182	1	7	top	NA	19	10	19-Oct	2017	18/12/2017	29	17	17	0	NA	171	21	0	182_1_7_19-Oct	0	0	0	0.823529412
182	1	8	bottom	NA	19	10	19-Oct	2017	18/12/2017	29	12	12	0	NA	172	21	0	182_1_8_19-Oct	0	0	0	0.75
182	1	8	top	NA	19	10	19-Oct	2017	18/12/2017	29	9	9	0	NA	173	21	0	182_1_8_19-Oct	0	0	0	1
182	1	9	bottom	NA	19	10	19-Oct	2017	18/12/2017	29	14	14	0	NA	174	21	0	182_1_9_19-Oct	0	0	0	0.642857143
182	1	9	top	NA	19	10	19-Oct	2017	18/12/2017	29	17	17	0	NA	175	21	0	182_1_9_19-Oct	0	0	0	1
182	2	1	bottom	NA	19	10	19-Oct	2017	18/12/2017	29	16	16	0	NA	180	21	0	182_2_1_19-Oct	0	0	0	1
182	2	1	top	NA	19	10	19-Oct	2017	18/12/2017	29	13	13	0	NA	181	21	1	182_2_1_19-Oct	7.692307692	7.692307692	0.076923077	1
182	2	3	bottom	NA	19	10	19-Oct	2017	18/12/2017	29	9	9	0	NA	182	21	0	182_2_3_19-Oct	0	0	0	1
182	2	3	top	NA	19	10	19-Oct	2017	18/12/2017	29	10	10	0	NA	183	21	0	182_2_3_19-Oct	0	0	0	1
182	2	4	bottom	NA	19	10	19-Oct	2017	18/12/2017	29	13	14	1	NA	184	21	0	182_2_4_19-Oct	0	0	0	1
182	2	4	top	NA	19	10	19-Oct	2017	18/12/2017	29	14	14	0	NA	185	21	0	182_2_4_19-Oct	0	0	0	0.928571429
182	2	5	bottom	NA	19	10	19-Oct	2017	18/12/2017	29	18	18	0	NA	186	21	0	182_2_5_19-Oct	0	0	0	1
182	2	5	top	NA	19	10	19-Oct	2017	18/12/2017	29	12	13	1	NA	187	21	0	182_2_5_19-Oct	0	0	0	1
182	2	6	bottom	NA	19	10	19-Oct	2017	18/12/2017	29	11	20	9	NA	188	21	0	182_2_6_19-Oct	0	0	0	0.454545455
182	2	6	top	NA	19	10	19-Oct	2017	18/12/2017	29	16	18	2	NA	189	21	0	182_2_6_19-Oct	0	0	0	0.4375
182	2	7	bottom	NA	19	10	19-Oct	2017	18/12/2017	29	11	21	10	NA	190	21	0	182_2_7_19-Oct	0	0	0	0.545454545
182	2	7	top	NA	19	10	19-Oct	2017	18/12/2017	29	11	14	3	NA	191	21	0	182_2_7_19-Oct	0	0	0	0.727272727
182	3	1	bottom	NA	19	10	19-Oct	2017	18/12/2017	29	9	12	3	NA	192	21	0	182_3_1_19-Oct	0	0	0	0.444444444
182	3	1	top	NA	19	10	19-Oct	2017	18/12/2017	29	7	7	0	NA	193	21	0	182_3_1_19-Oct	0	0	0	0.714285714
182	3	3	bottom	NA	19	10	19-Oct	2017	18/12/2017	29	9	13	4	NA	194	21	0	182_3_3_19-Oct	0	0	0	0.666666667
182	3	3	top	NA	19	10	19-Oct	2017	18/12/2017	29	7	7	0	NA	195	21	0	182_3_3_19-Oct	0	0	0	0.428571429
182	3	4	bottom	NA	19	10	19-Oct	2017	18/12/2017	29	5	5	0	NA	196	21	0	182_3_4_19-Oct	0	0	0	0.6
182	3	4	top	NA	19	10	19-Oct	2017	18/12/2017	29	13	13	0	NA	197	21	0	182_3_4_19-Oct	0	0	0	0.769230769
182	3	5	bottom	NA	19	10	19-Oct	2017	18/12/2017	29	13	13	0	NA	198	21	0	182_3_5_19-Oct	0	0	0	0.384615385
182	3	5	top	NA	19	10	19-Oct	2017	18/12/2017	29	10	10	0	NA	199	21	0	182_3_5_19-Oct	0	0	0	1
182	3	6	bottom	NA	19	10	19-Oct	2017	18/12/2017	29	8	9	1	NA	200	21	0	182_3_6_19-Oct	0	0	0	0.25
182	3	6	top	NA	19	10	19-Oct	2017	18/12/2017	29	6	7	1	NA	201	21	0	182_3_6_19-Oct	0	0	0	0.5
182	3	7	bottom	NA	19	10	19-Oct	2017	18/12/2017	29	22	24	2	NA	202	21	0	182_3_7_19-Oct	0	0	0	0.363636364
182	3	7	top	NA	19	10	19-Oct	2017	18/12/2017	29	14	15	1	NA	203	21	0	182_3_7_19-Oct	0	0	0	0.642857143
53	1	1	bottom	NA	19	10	19-Oct	2017	18/12/2017	29	13	16	3	NA	100	21	0	53_1_1_19-Oct	0	0	0	1
53	1	1	top	NA	19	10	19-Oct	2017	18/12/2017	29	12	15	3	NA	101	21	0	53_1_1_19-Oct	0	0	0	1
53	2	1	bottom	NA	19	10	19-Oct	2017	18/12/2017	29	19	20	1	NA	102	21	0	53_2_1_19-Oct	0	0	0	1
53	2	1	top	NA	19	10	19-Oct	2017	18/12/2017	29	19	19	0	NA	103	21	0	53_2_1_19-Oct	0	0	0	1
53	3	1	bottom	NA	19	10	19-Oct	2017	18/12/2017	29	11	14	3	NA	104	21	0	53_3_1_19-Oct	0	0	0	0.727272727
53	3	1	top	NA	19	10	19-Oct	2017	18/12/2017	29	12	13	1	NA	105	21	0	53_3_1_19-Oct	0	0	0	0.75
53	4	1	bottom	NA	19	10	19-Oct	2017	18/12/2017	29	3	19	16	NA	106	21	0	53_4_1_19-Oct	0	0	0	1
53	4	1	top	NA	19	10	19-Oct	2017	18/12/2017	29	5	12	7	NA	107	21	0	53_4_1_19-Oct	0	0	0	0.8
53	5	1	bottom	NA	19	10	19-Oct	2017	18/12/2017	29	21	23	2	NA	108	21	0	53_5_1_19-Oct	0	0	0	1
53	5	1	top	NA	19	10	19-Oct	2017	18/12/2017	29	17	17	0	NA	109	21	0	53_5_1_19-Oct	0	0	0	1
53	6	1	bottom	NA	19	10	19-Oct	2017	18/12/2017	29	3	10	7	NA	110	21	0	53_6_1_19-Oct	0	0	0	1
53	6	1	top	NA	19	10	19-Oct	2017	18/12/2017	29	9	11	2	NA	111	21	0	53_6_1_19-Oct	0	0	0	1
53	7	1	bottom	NA	19	10	19-Oct	2017	18/12/2017	29	18	22	4	NA	112	21	0	53_7_1_19-Oct	0	0	0	1
53	7	1	top	NA	19	10	19-Oct	2017	18/12/2017	29	17	17	0	NA	113	21	0	53_7_1_19-Oct	0	0	0	1
53	8	1	bottom	NA	19	10	19-Oct	2017	18/12/2017	29	21	22	1	NA	114	21	0	53_8_1_19-Oct	0	0	0	1
53	8	1	top	NA	19	10	19-Oct	2017	18/12/2017	29	20	20	0	NA	115	21	0	53_8_1_19-Oct	0	0	0	1
53	9	1	bottom	NA	19	10	19-Oct	2017	18/12/2017	29	10	18	8	NA	116	21	0	53_9_1_19-Oct	0	0	0	1
53	9	1	top	NA	19	10	19-Oct	2017	18/12/2017	29	11	12	1	NA	117	21	0	53_9_1_19-Oct	0	0	0	1
53	10	1	bottom	NA	19	10	19-Oct	2017	18/12/2017	29	6	22	16	NA	118	21	0	53_10_1_19-Oct	0	0	0	1
53	10	1	top	NA	19	10	19-Oct	2017	18/12/2017	29	14	14	0	NA	119	21	0	53_10_1_19-Oct	0	0	0	0.928571429
182	1	1	bottom	NA	19	10	19-Oct	2017	18/12/2017	29	15	15	0	NA	160	22	0	182_1_1_19-Oct	0	0	0	0.866666667
182	1	1	top	NA	19	10	19-Oct	2017	18/12/2017	29	6	6	0	NA	161	22	0	182_1_1_19-Oct	0	0	0	1
182	1	10	bottom	NA	19	10	19-Oct	2017	18/12/2017	29	9	12	3	NA	176	22	0	182_1_10_19-Oct	0	0	0	0.777777778
182	1	10	top	NA	19	10	19-Oct	2017	18/12/2017	29	6	6	0	NA	177	22	0	182_1_10_19-Oct	0	0	0	0.833333333
182	1	2	bottom	NA	19	10	19-Oct	2017	18/12/2017	29	22	22	0	NA	178	22	1	182_1_2_19-Oct	4.545454545	4.545454545	0.045454545	0.818181818
182	1	2	top	NA	19	10	19-Oct	2017	18/12/2017	29	10	10	0	NA	179	22	0	182_1_2_19-Oct	0	0	0	1
182	1	3	bottom	NA	19	10	19-Oct	2017	18/12/2017	29	19	19	0	NA	162	22	0	182_1_3_19-Oct	0	0	0	0.631578947
182	1	3	top	NA	19	10	19-Oct	2017	18/12/2017	29	5	5	0	NA	163	22	0	182_1_3_19-Oct	0	0	0	0.6
182	1	4	bottom	NA	19	10	19-Oct	2017	18/12/2017	29	8	9	1	NA	164	22	0	182_1_4_19-Oct	0	0	0	0.875
182	1	4	top	NA	19	10	19-Oct	2017	18/12/2017	29	5	6	1	NA	165	22	0	182_1_4_19-Oct	0	0	0	1
182	1	5	bottom	NA	19	10	19-Oct	2017	18/12/2017	29	16	22	6	NA	166	22	0	182_1_5_19-Oct	0	0	0	0.6875
182	1	5	top	NA	19	10	19-Oct	2017	18/12/2017	29	12	15	3	NA	167	22	0	182_1_5_19-Oct	0	0	0	0.833333333
182	1	6	bottom	NA	19	10	19-Oct	2017	18/12/2017	29	15	15	0	NA	168	22	0	182_1_6_19-Oct	0	0	0	0.666666667
182	1	6	top	NA	19	10	19-Oct	2017	18/12/2017	29	10	12	2	NA	169	22	0	182_1_6_19-Oct	0	0	0	0.6
182	1	7	bottom	NA	19	10	19-Oct	2017	18/12/2017	29	20	20	0	NA	170	22	0	182_1_7_19-Oct	0	0	0	0.55
182	1	7	top	NA	19	10	19-Oct	2017	18/12/2017	29	17	17	0	NA	171	22	0	182_1_7_19-Oct	0	0	0	0.823529412
182	1	8	bottom	NA	19	10	19-Oct	2017	18/12/2017	29	12	12	0	NA	172	22	0	182_1_8_19-Oct	0	0	0	0.75
182	1	8	top	NA	19	10	19-Oct	2017	18/12/2017	29	9	9	0	NA	173	22	0	182_1_8_19-Oct	0	0	0	1
182	1	9	bottom	NA	19	10	19-Oct	2017	18/12/2017	29	14	14	0	NA	174	22	1	182_1_9_19-Oct	7.142857143	7.142857143	0.071428571	0.714285714
182	1	9	top	NA	19	10	19-Oct	2017	18/12/2017	29	17	17	0	NA	175	22	0	182_1_9_19-Oct	0	0	0	1
182	2	1	bottom	NA	19	10	19-Oct	2017	18/12/2017	29	16	16	0	NA	180	22	0	182_2_1_19-Oct	0	0	0	1
182	2	1	top	NA	19	10	19-Oct	2017	18/12/2017	29	13	13	0	NA	181	22	0	182_2_1_19-Oct	0	0	0	1
182	2	3	bottom	NA	19	10	19-Oct	2017	18/12/2017	29	9	9	0	NA	182	22	0	182_2_3_19-Oct	0	0	0	1
182	2	3	top	NA	19	10	19-Oct	2017	18/12/2017	29	10	10	0	NA	183	22	0	182_2_3_19-Oct	0	0	0	1
182	2	4	bottom	NA	19	10	19-Oct	2017	18/12/2017	29	13	14	1	NA	184	22	0	182_2_4_19-Oct	0	0	0	1
182	2	4	top	NA	19	10	19-Oct	2017	18/12/2017	29	14	14	0	NA	185	22	0	182_2_4_19-Oct	0	0	0	0.928571429
182	2	5	bottom	NA	19	10	19-Oct	2017	18/12/2017	29	18	18	0	NA	186	22	0	182_2_5_19-Oct	0	0	0	1
182	2	5	top	NA	19	10	19-Oct	2017	18/12/2017	29	12	13	1	NA	187	22	0	182_2_5_19-Oct	0	0	0	1
182	2	6	bottom	NA	19	10	19-Oct	2017	18/12/2017	29	11	20	9	NA	188	22	0	182_2_6_19-Oct	0	0	0	0.454545455
182	2	6	top	NA	19	10	19-Oct	2017	18/12/2017	29	16	18	2	NA	189	22	0	182_2_6_19-Oct	0	0	0	0.4375
182	2	7	bottom	NA	19	10	19-Oct	2017	18/12/2017	29	11	21	10	NA	190	22	0	182_2_7_19-Oct	0	0	0	0.545454545
182	2	7	top	NA	19	10	19-Oct	2017	18/12/2017	29	11	14	3	NA	191	22	0	182_2_7_19-Oct	0	0	0	0.727272727
182	3	1	bottom	NA	19	10	19-Oct	2017	18/12/2017	29	9	12	3	NA	192	22	0	182_3_1_19-Oct	0	0	0	0.444444444
182	3	1	top	NA	19	10	19-Oct	2017	18/12/2017	29	7	7	0	NA	193	22	0	182_3_1_19-Oct	0	0	0	0.714285714
182	3	3	bottom	NA	19	10	19-Oct	2017	18/12/2017	29	9	13	4	NA	194	22	0	182_3_3_19-Oct	0	0	0	0.666666667
182	3	3	top	NA	19	10	19-Oct	2017	18/12/2017	29	7	7	0	NA	195	22	0	182_3_3_19-Oct	0	0	0	0.428571429
182	3	4	bottom	NA	19	10	19-Oct	2017	18/12/2017	29	5	5	0	NA	196	22	0	182_3_4_19-Oct	0	0	0	0.6
182	3	4	top	NA	19	10	19-Oct	2017	18/12/2017	29	13	13	0	NA	197	22	0	182_3_4_19-Oct	0	0	0	0.769230769
182	3	5	bottom	NA	19	10	19-Oct	2017	18/12/2017	29	13	13	0	NA	198	22	0	182_3_5_19-Oct	0	0	0	0.384615385
182	3	5	top	NA	19	10	19-Oct	2017	18/12/2017	29	10	10	0	NA	199	22	0	182_3_5_19-Oct	0	0	0	1
182	3	6	bottom	NA	19	10	19-Oct	2017	18/12/2017	29	8	9	1	NA	200	22	0	182_3_6_19-Oct	0	0	0	0.25
182	3	6	top	NA	19	10	19-Oct	2017	18/12/2017	29	6	7	1	NA	201	22	0	182_3_6_19-Oct	0	0	0	0.5
182	3	7	bottom	NA	19	10	19-Oct	2017	18/12/2017	29	22	24	2	NA	202	22	0	182_3_7_19-Oct	0	0	0	0.363636364
182	3	7	top	NA	19	10	19-Oct	2017	18/12/2017	29	14	15	1	NA	203	22	0	182_3_7_19-Oct	0	0	0	0.642857143
53	1	1	bottom	NA	19	10	19-Oct	2017	18/12/2017	29	13	16	3	NA	100	22	0	53_1_1_19-Oct	0	0	0	1
53	1	1	top	NA	19	10	19-Oct	2017	18/12/2017	29	12	15	3	NA	101	22	0	53_1_1_19-Oct	0	0	0	1
53	2	1	bottom	NA	19	10	19-Oct	2017	18/12/2017	29	19	20	1	NA	102	22	0	53_2_1_19-Oct	0	0	0	1
53	2	1	top	NA	19	10	19-Oct	2017	18/12/2017	29	19	19	0	NA	103	22	0	53_2_1_19-Oct	0	0	0	1
53	3	1	bottom	NA	19	10	19-Oct	2017	18/12/2017	29	11	14	3	NA	104	22	0	53_3_1_19-Oct	0	0	0	0.727272727
53	3	1	top	NA	19	10	19-Oct	2017	18/12/2017	29	12	13	1	NA	105	22	0	53_3_1_19-Oct	0	0	0	0.75
53	4	1	bottom	NA	19	10	19-Oct	2017	18/12/2017	29	3	19	16	NA	106	22	0	53_4_1_19-Oct	0	0	0	1
53	4	1	top	NA	19	10	19-Oct	2017	18/12/2017	29	5	12	7	NA	107	22	1	53_4_1_19-Oct	8.333333333	20	0.2	1
53	5	1	bottom	NA	19	10	19-Oct	2017	18/12/2017	29	21	23	2	NA	108	22	0	53_5_1_19-Oct	0	0	0	1
53	5	1	top	NA	19	10	19-Oct	2017	18/12/2017	29	17	17	0	NA	109	22	0	53_5_1_19-Oct	0	0	0	1
53	6	1	bottom	NA	19	10	19-Oct	2017	18/12/2017	29	3	10	7	NA	110	22	0	53_6_1_19-Oct	0	0	0	1
53	6	1	top	NA	19	10	19-Oct	2017	18/12/2017	29	9	11	2	NA	111	22	0	53_6_1_19-Oct	0	0	0	1
53	7	1	bottom	NA	19	10	19-Oct	2017	18/12/2017	29	18	22	4	NA	112	22	0	53_7_1_19-Oct	0	0	0	1
53	7	1	top	NA	19	10	19-Oct	2017	18/12/2017	29	17	17	0	NA	113	22	0	53_7_1_19-Oct	0	0	0	1
53	8	1	bottom	NA	19	10	19-Oct	2017	18/12/2017	29	21	22	1	NA	114	22	0	53_8_1_19-Oct	0	0	0	1
53	8	1	top	NA	19	10	19-Oct	2017	18/12/2017	29	20	20	0	NA	115	22	0	53_8_1_19-Oct	0	0	0	1
53	9	1	bottom	NA	19	10	19-Oct	2017	18/12/2017	29	10	18	8	NA	116	22	0	53_9_1_19-Oct	0	0	0	1
53	9	1	top	NA	19	10	19-Oct	2017	18/12/2017	29	11	12	1	NA	117	22	0	53_9_1_19-Oct	0	0	0	1
53	10	1	bottom	NA	19	10	19-Oct	2017	18/12/2017	29	6	22	16	NA	118	22	0	53_10_1_19-Oct	0	0	0	1
53	10	1	top	NA	19	10	19-Oct	2017	18/12/2017	29	14	14	0	NA	119	22	0	53_10_1_19-Oct	0	0	0	0.928571429
182	1	1	bottom	NA	19	10	19-Oct	2017	18/12/2017	29	15	15	0	NA	160	23	0	182_1_1_19-Oct	0	0	0	0.866666667
182	1	1	top	NA	19	10	19-Oct	2017	18/12/2017	29	6	6	0	NA	161	23	0	182_1_1_19-Oct	0	0	0	1
182	1	10	bottom	NA	19	10	19-Oct	2017	18/12/2017	29	9	12	3	NA	176	23	0	182_1_10_19-Oct	0	0	0	0.777777778
182	1	10	top	NA	19	10	19-Oct	2017	18/12/2017	29	6	6	0	NA	177	23	0	182_1_10_19-Oct	0	0	0	0.833333333
182	1	2	bottom	NA	19	10	19-Oct	2017	18/12/2017	29	22	22	0	NA	178	23	0	182_1_2_19-Oct	0	0	0	0.818181818
182	1	2	top	NA	19	10	19-Oct	2017	18/12/2017	29	10	10	0	NA	179	23	0	182_1_2_19-Oct	0	0	0	1
182	1	3	bottom	NA	19	10	19-Oct	2017	18/12/2017	29	19	19	0	NA	162	23	1	182_1_3_19-Oct	5.263157895	5.263157895	0.052631579	0.684210526
182	1	3	top	NA	19	10	19-Oct	2017	18/12/2017	29	5	5	0	NA	163	23	0	182_1_3_19-Oct	0	0	0	0.6
182	1	4	bottom	NA	19	10	19-Oct	2017	18/12/2017	29	8	9	1	NA	164	23	0	182_1_4_19-Oct	0	0	0	0.875
182	1	4	top	NA	19	10	19-Oct	2017	18/12/2017	29	5	6	1	NA	165	23	0	182_1_4_19-Oct	0	0	0	1
182	1	5	bottom	NA	19	10	19-Oct	2017	18/12/2017	29	16	22	6	NA	166	23	0	182_1_5_19-Oct	0	0	0	0.6875
182	1	5	top	NA	19	10	19-Oct	2017	18/12/2017	29	12	15	3	NA	167	23	0	182_1_5_19-Oct	0	0	0	0.833333333
182	1	6	bottom	NA	19	10	19-Oct	2017	18/12/2017	29	15	15	0	NA	168	23	0	182_1_6_19-Oct	0	0	0	0.666666667
182	1	6	top	NA	19	10	19-Oct	2017	18/12/2017	29	10	12	2	NA	169	23	0	182_1_6_19-Oct	0	0	0	0.6
182	1	7	bottom	NA	19	10	19-Oct	2017	18/12/2017	29	20	20	0	NA	170	23	0	182_1_7_19-Oct	0	0	0	0.55
182	1	7	top	NA	19	10	19-Oct	2017	18/12/2017	29	17	17	0	NA	171	23	0	182_1_7_19-Oct	0	0	0	0.823529412
182	1	8	bottom	NA	19	10	19-Oct	2017	18/12/2017	29	12	12	0	NA	172	23	0	182_1_8_19-Oct	0	0	0	0.75
182	1	8	top	NA	19	10	19-Oct	2017	18/12/2017	29	9	9	0	NA	173	23	0	182_1_8_19-Oct	0	0	0	1
182	1	9	bottom	NA	19	10	19-Oct	2017	18/12/2017	29	14	14	0	NA	174	23	0	182_1_9_19-Oct	0	0	0	0.714285714
182	1	9	top	NA	19	10	19-Oct	2017	18/12/2017	29	17	17	0	NA	175	23	0	182_1_9_19-Oct	0	0	0	1
182	2	1	bottom	NA	19	10	19-Oct	2017	18/12/2017	29	16	16	0	NA	180	23	0	182_2_1_19-Oct	0	0	0	1
182	2	1	top	NA	19	10	19-Oct	2017	18/12/2017	29	13	13	0	NA	181	23	0	182_2_1_19-Oct	0	0	0	1
182	2	3	bottom	NA	19	10	19-Oct	2017	18/12/2017	29	9	9	0	NA	182	23	0	182_2_3_19-Oct	0	0	0	1
182	2	3	top	NA	19	10	19-Oct	2017	18/12/2017	29	10	10	0	NA	183	23	0	182_2_3_19-Oct	0	0	0	1
182	2	4	bottom	NA	19	10	19-Oct	2017	18/12/2017	29	13	14	1	NA	184	23	0	182_2_4_19-Oct	0	0	0	1
182	2	4	top	NA	19	10	19-Oct	2017	18/12/2017	29	14	14	0	NA	185	23	0	182_2_4_19-Oct	0	0	0	0.928571429
182	2	5	bottom	NA	19	10	19-Oct	2017	18/12/2017	29	18	18	0	NA	186	23	0	182_2_5_19-Oct	0	0	0	1
182	2	5	top	NA	19	10	19-Oct	2017	18/12/2017	29	12	13	1	NA	187	23	0	182_2_5_19-Oct	0	0	0	1
182	2	6	bottom	NA	19	10	19-Oct	2017	18/12/2017	29	11	20	9	NA	188	23	0	182_2_6_19-Oct	0	0	0	0.454545455
182	2	6	top	NA	19	10	19-Oct	2017	18/12/2017	29	16	18	2	NA	189	23	0	182_2_6_19-Oct	0	0	0	0.4375
182	2	7	bottom	NA	19	10	19-Oct	2017	18/12/2017	29	11	21	10	NA	190	23	0	182_2_7_19-Oct	0	0	0	0.545454545
182	2	7	top	NA	19	10	19-Oct	2017	18/12/2017	29	11	14	3	NA	191	23	0	182_2_7_19-Oct	0	0	0	0.727272727
182	3	1	bottom	NA	19	10	19-Oct	2017	18/12/2017	29	9	12	3	NA	192	23	0	182_3_1_19-Oct	0	0	0	0.444444444
182	3	1	top	NA	19	10	19-Oct	2017	18/12/2017	29	7	7	0	NA	193	23	1	182_3_1_19-Oct	14.28571429	14.28571429	0.142857143	0.857142857
182	3	3	bottom	NA	19	10	19-Oct	2017	18/12/2017	29	9	13	4	NA	194	23	0	182_3_3_19-Oct	0	0	0	0.666666667
182	3	3	top	NA	19	10	19-Oct	2017	18/12/2017	29	7	7	0	NA	195	23	0	182_3_3_19-Oct	0	0	0	0.428571429
182	3	4	bottom	NA	19	10	19-Oct	2017	18/12/2017	29	5	5	0	NA	196	23	0	182_3_4_19-Oct	0	0	0	0.6
182	3	4	top	NA	19	10	19-Oct	2017	18/12/2017	29	13	13	0	NA	197	23	0	182_3_4_19-Oct	0	0	0	0.769230769
182	3	5	bottom	NA	19	10	19-Oct	2017	18/12/2017	29	13	13	0	NA	198	23	0	182_3_5_19-Oct	0	0	0	0.384615385
182	3	5	top	NA	19	10	19-Oct	2017	18/12/2017	29	10	10	0	NA	199	23	0	182_3_5_19-Oct	0	0	0	1
182	3	6	bottom	NA	19	10	19-Oct	2017	18/12/2017	29	8	9	1	NA	200	23	0	182_3_6_19-Oct	0	0	0	0.25
182	3	6	top	NA	19	10	19-Oct	2017	18/12/2017	29	6	7	1	NA	201	23	0	182_3_6_19-Oct	0	0	0	0.5
182	3	7	bottom	NA	19	10	19-Oct	2017	18/12/2017	29	22	24	2	NA	202	23	0	182_3_7_19-Oct	0	0	0	0.363636364
182	3	7	top	NA	19	10	19-Oct	2017	18/12/2017	29	14	15	1	NA	203	23	0	182_3_7_19-Oct	0	0	0	0.642857143
53	1	1	bottom	NA	19	10	19-Oct	2017	18/12/2017	29	13	16	3	NA	100	23	0	53_1_1_19-Oct	0	0	0	1
53	1	1	top	NA	19	10	19-Oct	2017	18/12/2017	29	12	15	3	NA	101	23	0	53_1_1_19-Oct	0	0	0	1
53	2	1	bottom	NA	19	10	19-Oct	2017	18/12/2017	29	19	20	1	NA	102	23	0	53_2_1_19-Oct	0	0	0	1
53	2	1	top	NA	19	10	19-Oct	2017	18/12/2017	29	19	19	0	NA	103	23	0	53_2_1_19-Oct	0	0	0	1
53	3	1	bottom	NA	19	10	19-Oct	2017	18/12/2017	29	11	14	3	NA	104	23	0	53_3_1_19-Oct	0	0	0	0.727272727
53	3	1	top	NA	19	10	19-Oct	2017	18/12/2017	29	12	13	1	NA	105	23	0	53_3_1_19-Oct	0	0	0	0.75
53	4	1	bottom	NA	19	10	19-Oct	2017	18/12/2017	29	3	19	16	NA	106	23	0	53_4_1_19-Oct	0	0	0	1
53	4	1	top	NA	19	10	19-Oct	2017	18/12/2017	29	5	12	7	NA	107	23	0	53_4_1_19-Oct	0	0	0	1
53	5	1	bottom	NA	19	10	19-Oct	2017	18/12/2017	29	21	23	2	NA	108	23	0	53_5_1_19-Oct	0	0	0	1
53	5	1	top	NA	19	10	19-Oct	2017	18/12/2017	29	17	17	0	NA	109	23	0	53_5_1_19-Oct	0	0	0	1
53	6	1	bottom	NA	19	10	19-Oct	2017	18/12/2017	29	3	10	7	NA	110	23	0	53_6_1_19-Oct	0	0	0	1
53	6	1	top	NA	19	10	19-Oct	2017	18/12/2017	29	9	11	2	NA	111	23	0	53_6_1_19-Oct	0	0	0	1
53	7	1	bottom	NA	19	10	19-Oct	2017	18/12/2017	29	18	22	4	NA	112	23	0	53_7_1_19-Oct	0	0	0	1
53	7	1	top	NA	19	10	19-Oct	2017	18/12/2017	29	17	17	0	NA	113	23	0	53_7_1_19-Oct	0	0	0	1
53	8	1	bottom	NA	19	10	19-Oct	2017	18/12/2017	29	21	22	1	NA	114	23	0	53_8_1_19-Oct	0	0	0	1
53	8	1	top	NA	19	10	19-Oct	2017	18/12/2017	29	20	20	0	NA	115	23	0	53_8_1_19-Oct	0	0	0	1
53	9	1	bottom	NA	19	10	19-Oct	2017	18/12/2017	29	10	18	8	NA	116	23	0	53_9_1_19-Oct	0	0	0	1
53	9	1	top	NA	19	10	19-Oct	2017	18/12/2017	29	11	12	1	NA	117	23	0	53_9_1_19-Oct	0	0	0	1
53	10	1	bottom	NA	19	10	19-Oct	2017	18/12/2017	29	6	22	16	NA	118	23	0	53_10_1_19-Oct	0	0	0	1
53	10	1	top	NA	19	10	19-Oct	2017	18/12/2017	29	14	14	0	NA	119	23	0	53_10_1_19-Oct	0	0	0	0.928571429
182	1	1	bottom	NA	19	10	19-Oct	2017	18/12/2017	29	15	15	0	NA	160	24	0	182_1_1_19-Oct	0	0	0	0.866666667
182	1	1	top	NA	19	10	19-Oct	2017	18/12/2017	29	6	6	0	NA	161	24	0	182_1_1_19-Oct	0	0	0	1
182	1	10	bottom	NA	19	10	19-Oct	2017	18/12/2017	29	9	12	3	NA	176	24	0	182_1_10_19-Oct	0	0	0	0.777777778
182	1	10	top	NA	19	10	19-Oct	2017	18/12/2017	29	6	6	0	NA	177	24	0	182_1_10_19-Oct	0	0	0	0.833333333
182	1	2	bottom	NA	19	10	19-Oct	2017	18/12/2017	29	22	22	0	NA	178	24	0	182_1_2_19-Oct	0	0	0	0.818181818
182	1	2	top	NA	19	10	19-Oct	2017	18/12/2017	29	10	10	0	NA	179	24	0	182_1_2_19-Oct	0	0	0	1
182	1	3	bottom	NA	19	10	19-Oct	2017	18/12/2017	29	19	19	0	NA	162	24	0	182_1_3_19-Oct	0	0	0	0.684210526
182	1	3	top	NA	19	10	19-Oct	2017	18/12/2017	29	5	5	0	NA	163	24	0	182_1_3_19-Oct	0	0	0	0.6
182	1	4	bottom	NA	19	10	19-Oct	2017	18/12/2017	29	8	9	1	NA	164	24	0	182_1_4_19-Oct	0	0	0	0.875
182	1	4	top	NA	19	10	19-Oct	2017	18/12/2017	29	5	6	1	NA	165	24	0	182_1_4_19-Oct	0	0	0	1
182	1	5	bottom	NA	19	10	19-Oct	2017	18/12/2017	29	16	22	6	NA	166	24	0	182_1_5_19-Oct	0	0	0	0.6875
182	1	5	top	NA	19	10	19-Oct	2017	18/12/2017	29	12	15	3	NA	167	24	0	182_1_5_19-Oct	0	0	0	0.833333333
182	1	6	bottom	NA	19	10	19-Oct	2017	18/12/2017	29	15	15	0	NA	168	24	0	182_1_6_19-Oct	0	0	0	0.666666667
182	1	6	top	NA	19	10	19-Oct	2017	18/12/2017	29	10	12	2	NA	169	24	0	182_1_6_19-Oct	0	0	0	0.6
182	1	7	bottom	NA	19	10	19-Oct	2017	18/12/2017	29	20	20	0	NA	170	24	0	182_1_7_19-Oct	0	0	0	0.55
182	1	7	top	NA	19	10	19-Oct	2017	18/12/2017	29	17	17	0	NA	171	24	0	182_1_7_19-Oct	0	0	0	0.823529412
182	1	8	bottom	NA	19	10	19-Oct	2017	18/12/2017	29	12	12	0	NA	172	24	0	182_1_8_19-Oct	0	0	0	0.75
182	1	8	top	NA	19	10	19-Oct	2017	18/12/2017	29	9	9	0	NA	173	24	0	182_1_8_19-Oct	0	0	0	1
182	1	9	bottom	NA	19	10	19-Oct	2017	18/12/2017	29	14	14	0	NA	174	24	0	182_1_9_19-Oct	0	0	0	0.714285714
182	1	9	top	NA	19	10	19-Oct	2017	18/12/2017	29	17	17	0	NA	175	24	0	182_1_9_19-Oct	0	0	0	1
182	2	1	bottom	NA	19	10	19-Oct	2017	18/12/2017	29	16	16	0	NA	180	24	0	182_2_1_19-Oct	0	0	0	1
182	2	1	top	NA	19	10	19-Oct	2017	18/12/2017	29	13	13	0	NA	181	24	0	182_2_1_19-Oct	0	0	0	1
182	2	3	bottom	NA	19	10	19-Oct	2017	18/12/2017	29	9	9	0	NA	182	24	0	182_2_3_19-Oct	0	0	0	1
182	2	3	top	NA	19	10	19-Oct	2017	18/12/2017	29	10	10	0	NA	183	24	0	182_2_3_19-Oct	0	0	0	1
182	2	4	bottom	NA	19	10	19-Oct	2017	18/12/2017	29	13	14	1	NA	184	24	0	182_2_4_19-Oct	0	0	0	1
182	2	4	top	NA	19	10	19-Oct	2017	18/12/2017	29	14	14	0	NA	185	24	0	182_2_4_19-Oct	0	0	0	0.928571429
182	2	5	bottom	NA	19	10	19-Oct	2017	18/12/2017	29	18	18	0	NA	186	24	0	182_2_5_19-Oct	0	0	0	1
182	2	5	top	NA	19	10	19-Oct	2017	18/12/2017	29	12	13	1	NA	187	24	0	182_2_5_19-Oct	0	0	0	1
182	2	6	bottom	NA	19	10	19-Oct	2017	18/12/2017	29	11	20	9	NA	188	24	0	182_2_6_19-Oct	0	0	0	0.454545455
182	2	6	top	NA	19	10	19-Oct	2017	18/12/2017	29	16	18	2	NA	189	24	0	182_2_6_19-Oct	0	0	0	0.4375
182	2	7	bottom	NA	19	10	19-Oct	2017	18/12/2017	29	11	21	10	NA	190	24	0	182_2_7_19-Oct	0	0	0	0.545454545
182	2	7	top	NA	19	10	19-Oct	2017	18/12/2017	29	11	14	3	NA	191	24	0	182_2_7_19-Oct	0	0	0	0.727272727
182	3	1	bottom	NA	19	10	19-Oct	2017	18/12/2017	29	9	12	3	NA	192	24	0	182_3_1_19-Oct	0	0	0	0.444444444
182	3	1	top	NA	19	10	19-Oct	2017	18/12/2017	29	7	7	0	NA	193	24	0	182_3_1_19-Oct	0	0	0	0.857142857
182	3	3	bottom	NA	19	10	19-Oct	2017	18/12/2017	29	9	13	4	NA	194	24	0	182_3_3_19-Oct	0	0	0	0.666666667
182	3	3	top	NA	19	10	19-Oct	2017	18/12/2017	29	7	7	0	NA	195	24	0	182_3_3_19-Oct	0	0	0	0.428571429
182	3	4	bottom	NA	19	10	19-Oct	2017	18/12/2017	29	5	5	0	NA	196	24	0	182_3_4_19-Oct	0	0	0	0.6
182	3	4	top	NA	19	10	19-Oct	2017	18/12/2017	29	13	13	0	NA	197	24	0	182_3_4_19-Oct	0	0	0	0.769230769
182	3	5	bottom	NA	19	10	19-Oct	2017	18/12/2017	29	13	13	0	NA	198	24	0	182_3_5_19-Oct	0	0	0	0.384615385
182	3	5	top	NA	19	10	19-Oct	2017	18/12/2017	29	10	10	0	NA	199	24	0	182_3_5_19-Oct	0	0	0	1
182	3	6	bottom	NA	19	10	19-Oct	2017	18/12/2017	29	8	9	1	NA	200	24	0	182_3_6_19-Oct	0	0	0	0.25
182	3	6	top	NA	19	10	19-Oct	2017	18/12/2017	29	6	7	1	NA	201	24	0	182_3_6_19-Oct	0	0	0	0.5
182	3	7	bottom	NA	19	10	19-Oct	2017	18/12/2017	29	22	24	2	NA	202	24	0	182_3_7_19-Oct	0	0	0	0.363636364
182	3	7	top	NA	19	10	19-Oct	2017	18/12/2017	29	14	15	1	NA	203	24	0	182_3_7_19-Oct	0	0	0	0.642857143
53	1	1	bottom	NA	19	10	19-Oct	2017	18/12/2017	29	13	16	3	NA	100	24	0	53_1_1_19-Oct	0	0	0	1
53	1	1	top	NA	19	10	19-Oct	2017	18/12/2017	29	12	15	3	NA	101	24	0	53_1_1_19-Oct	0	0	0	1
53	2	1	bottom	NA	19	10	19-Oct	2017	18/12/2017	29	19	20	1	NA	102	24	0	53_2_1_19-Oct	0	0	0	1
53	2	1	top	NA	19	10	19-Oct	2017	18/12/2017	29	19	19	0	NA	103	24	0	53_2_1_19-Oct	0	0	0	1
53	3	1	bottom	NA	19	10	19-Oct	2017	18/12/2017	29	11	14	3	NA	104	24	0	53_3_1_19-Oct	0	0	0	0.727272727
53	3	1	top	NA	19	10	19-Oct	2017	18/12/2017	29	12	13	1	NA	105	24	0	53_3_1_19-Oct	0	0	0	0.75
53	4	1	bottom	NA	19	10	19-Oct	2017	18/12/2017	29	3	19	16	NA	106	24	0	53_4_1_19-Oct	0	0	0	1
53	4	1	top	NA	19	10	19-Oct	2017	18/12/2017	29	5	12	7	NA	107	24	0	53_4_1_19-Oct	0	0	0	1
53	5	1	bottom	NA	19	10	19-Oct	2017	18/12/2017	29	21	23	2	NA	108	24	0	53_5_1_19-Oct	0	0	0	1
53	5	1	top	NA	19	10	19-Oct	2017	18/12/2017	29	17	17	0	NA	109	24	0	53_5_1_19-Oct	0	0	0	1
53	6	1	bottom	NA	19	10	19-Oct	2017	18/12/2017	29	3	10	7	NA	110	24	0	53_6_1_19-Oct	0	0	0	1
53	6	1	top	NA	19	10	19-Oct	2017	18/12/2017	29	9	11	2	NA	111	24	0	53_6_1_19-Oct	0	0	0	1
53	7	1	bottom	NA	19	10	19-Oct	2017	18/12/2017	29	18	22	4	NA	112	24	0	53_7_1_19-Oct	0	0	0	1
53	7	1	top	NA	19	10	19-Oct	2017	18/12/2017	29	17	17	0	NA	113	24	0	53_7_1_19-Oct	0	0	0	1
53	8	1	bottom	NA	19	10	19-Oct	2017	18/12/2017	29	21	22	1	NA	114	24	0	53_8_1_19-Oct	0	0	0	1
53	8	1	top	NA	19	10	19-Oct	2017	18/12/2017	29	20	20	0	NA	115	24	0	53_8_1_19-Oct	0	0	0	1
53	9	1	bottom	NA	19	10	19-Oct	2017	18/12/2017	29	10	18	8	NA	116	24	0	53_9_1_19-Oct	0	0	0	1
53	9	1	top	NA	19	10	19-Oct	2017	18/12/2017	29	11	12	1	NA	117	24	0	53_9_1_19-Oct	0	0	0	1
53	10	1	bottom	NA	19	10	19-Oct	2017	18/12/2017	29	6	22	16	NA	118	24	0	53_10_1_19-Oct	0	0	0	1
53	10	1	top	NA	19	10	19-Oct	2017	18/12/2017	29	14	14	0	NA	119	24	0	53_10_1_19-Oct	0	0	0	0.928571429
182	1	1	bottom	NA	19	10	19-Oct	2017	18/12/2017	29	15	15	0	NA	160	25	0	182_1_1_19-Oct	0	0	0	0.866666667
182	1	1	top	NA	19	10	19-Oct	2017	18/12/2017	29	6	6	0	NA	161	25	0	182_1_1_19-Oct	0	0	0	1
182	1	10	bottom	NA	19	10	19-Oct	2017	18/12/2017	29	9	12	3	NA	176	25	0	182_1_10_19-Oct	0	0	0	0.777777778
182	1	10	top	NA	19	10	19-Oct	2017	18/12/2017	29	6	6	0	NA	177	25	0	182_1_10_19-Oct	0	0	0	0.833333333
182	1	2	bottom	NA	19	10	19-Oct	2017	18/12/2017	29	22	22	0	NA	178	25	1	182_1_2_19-Oct	4.545454545	4.545454545	0.045454545	0.863636364
182	1	2	top	NA	19	10	19-Oct	2017	18/12/2017	29	10	10	0	NA	179	25	0	182_1_2_19-Oct	0	0	0	1
182	1	3	bottom	NA	19	10	19-Oct	2017	18/12/2017	29	19	19	0	NA	162	25	1	182_1_3_19-Oct	5.263157895	5.263157895	0.052631579	0.736842105
182	1	3	top	NA	19	10	19-Oct	2017	18/12/2017	29	5	5	0	NA	163	25	0	182_1_3_19-Oct	0	0	0	0.6
182	1	4	bottom	NA	19	10	19-Oct	2017	18/12/2017	29	8	9	1	NA	164	25	0	182_1_4_19-Oct	0	0	0	0.875
182	1	4	top	NA	19	10	19-Oct	2017	18/12/2017	29	5	6	1	NA	165	25	0	182_1_4_19-Oct	0	0	0	1
182	1	5	bottom	NA	19	10	19-Oct	2017	18/12/2017	29	16	22	6	NA	166	25	0	182_1_5_19-Oct	0	0	0	0.6875
182	1	5	top	NA	19	10	19-Oct	2017	18/12/2017	29	12	15	3	NA	167	25	0	182_1_5_19-Oct	0	0	0	0.833333333
182	1	6	bottom	NA	19	10	19-Oct	2017	18/12/2017	29	15	15	0	NA	168	25	0	182_1_6_19-Oct	0	0	0	0.666666667
182	1	6	top	NA	19	10	19-Oct	2017	18/12/2017	29	10	12	2	NA	169	25	0	182_1_6_19-Oct	0	0	0	0.6
182	1	7	bottom	NA	19	10	19-Oct	2017	18/12/2017	29	20	20	0	NA	170	25	1	182_1_7_19-Oct	5	5	0.05	0.6
182	1	7	top	NA	19	10	19-Oct	2017	18/12/2017	29	17	17	0	NA	171	25	0	182_1_7_19-Oct	0	0	0	0.823529412
182	1	8	bottom	NA	19	10	19-Oct	2017	18/12/2017	29	12	12	0	NA	172	25	1	182_1_8_19-Oct	8.333333333	8.333333333	0.083333333	0.833333333
182	1	8	top	NA	19	10	19-Oct	2017	18/12/2017	29	9	9	0	NA	173	25	0	182_1_8_19-Oct	0	0	0	1
182	1	9	bottom	NA	19	10	19-Oct	2017	18/12/2017	29	14	14	0	NA	174	25	0	182_1_9_19-Oct	0	0	0	0.714285714
182	1	9	top	NA	19	10	19-Oct	2017	18/12/2017	29	17	17	0	NA	175	25	0	182_1_9_19-Oct	0	0	0	1
182	2	1	bottom	NA	19	10	19-Oct	2017	18/12/2017	29	16	16	0	NA	180	25	0	182_2_1_19-Oct	0	0	0	1
182	2	1	top	NA	19	10	19-Oct	2017	18/12/2017	29	13	13	0	NA	181	25	0	182_2_1_19-Oct	0	0	0	1
182	2	3	bottom	NA	19	10	19-Oct	2017	18/12/2017	29	9	9	0	NA	182	25	0	182_2_3_19-Oct	0	0	0	1
182	2	3	top	NA	19	10	19-Oct	2017	18/12/2017	29	10	10	0	NA	183	25	0	182_2_3_19-Oct	0	0	0	1
182	2	4	bottom	NA	19	10	19-Oct	2017	18/12/2017	29	13	14	1	NA	184	25	0	182_2_4_19-Oct	0	0	0	1
182	2	4	top	NA	19	10	19-Oct	2017	18/12/2017	29	14	14	0	NA	185	25	0	182_2_4_19-Oct	0	0	0	0.928571429
182	2	5	bottom	NA	19	10	19-Oct	2017	18/12/2017	29	18	18	0	NA	186	25	0	182_2_5_19-Oct	0	0	0	1
182	2	5	top	NA	19	10	19-Oct	2017	18/12/2017	29	12	13	1	NA	187	25	0	182_2_5_19-Oct	0	0	0	1
182	2	6	bottom	NA	19	10	19-Oct	2017	18/12/2017	29	11	20	9	NA	188	25	0	182_2_6_19-Oct	0	0	0	0.454545455
182	2	6	top	NA	19	10	19-Oct	2017	18/12/2017	29	16	18	2	NA	189	25	0	182_2_6_19-Oct	0	0	0	0.4375
182	2	7	bottom	NA	19	10	19-Oct	2017	18/12/2017	29	11	21	10	NA	190	25	0	182_2_7_19-Oct	0	0	0	0.545454545
182	2	7	top	NA	19	10	19-Oct	2017	18/12/2017	29	11	14	3	NA	191	25	0	182_2_7_19-Oct	0	0	0	0.727272727
182	3	1	bottom	NA	19	10	19-Oct	2017	18/12/2017	29	9	12	3	NA	192	25	0	182_3_1_19-Oct	0	0	0	0.444444444
182	3	1	top	NA	19	10	19-Oct	2017	18/12/2017	29	7	7	0	NA	193	25	1	182_3_1_19-Oct	14.28571429	14.28571429	0.142857143	1
182	3	3	bottom	NA	19	10	19-Oct	2017	18/12/2017	29	9	13	4	NA	194	25	0	182_3_3_19-Oct	0	0	0	0.666666667
182	3	3	top	NA	19	10	19-Oct	2017	18/12/2017	29	7	7	0	NA	195	25	0	182_3_3_19-Oct	0	0	0	0.428571429
182	3	4	bottom	NA	19	10	19-Oct	2017	18/12/2017	29	5	5	0	NA	196	25	0	182_3_4_19-Oct	0	0	0	0.6
182	3	4	top	NA	19	10	19-Oct	2017	18/12/2017	29	13	13	0	NA	197	25	0	182_3_4_19-Oct	0	0	0	0.769230769
182	3	5	bottom	NA	19	10	19-Oct	2017	18/12/2017	29	13	13	0	NA	198	25	0	182_3_5_19-Oct	0	0	0	0.384615385
182	3	5	top	NA	19	10	19-Oct	2017	18/12/2017	29	10	10	0	NA	199	25	0	182_3_5_19-Oct	0	0	0	1
182	3	6	bottom	NA	19	10	19-Oct	2017	18/12/2017	29	8	9	1	NA	200	25	0	182_3_6_19-Oct	0	0	0	0.25
182	3	6	top	NA	19	10	19-Oct	2017	18/12/2017	29	6	7	1	NA	201	25	0	182_3_6_19-Oct	0	0	0	0.5
182	3	7	bottom	NA	19	10	19-Oct	2017	18/12/2017	29	22	24	2	NA	202	25	0	182_3_7_19-Oct	0	0	0	0.363636364
182	3	7	top	NA	19	10	19-Oct	2017	18/12/2017	29	14	15	1	NA	203	25	0	182_3_7_19-Oct	0	0	0	0.642857143
53	1	1	bottom	NA	19	10	19-Oct	2017	18/12/2017	29	13	16	3	NA	100	25	0	53_1_1_19-Oct	0	0	0	1
53	1	1	top	NA	19	10	19-Oct	2017	18/12/2017	29	12	15	3	NA	101	25	0	53_1_1_19-Oct	0	0	0	1
53	2	1	bottom	NA	19	10	19-Oct	2017	18/12/2017	29	19	20	1	NA	102	25	0	53_2_1_19-Oct	0	0	0	1
53	2	1	top	NA	19	10	19-Oct	2017	18/12/2017	29	19	19	0	NA	103	25	0	53_2_1_19-Oct	0	0	0	1
53	3	1	bottom	NA	19	10	19-Oct	2017	18/12/2017	29	11	14	3	NA	104	25	0	53_3_1_19-Oct	0	0	0	0.727272727
53	3	1	top	NA	19	10	19-Oct	2017	18/12/2017	29	12	13	1	NA	105	25	0	53_3_1_19-Oct	0	0	0	0.75
53	4	1	bottom	NA	19	10	19-Oct	2017	18/12/2017	29	3	19	16	NA	106	25	0	53_4_1_19-Oct	0	0	0	1
53	4	1	top	NA	19	10	19-Oct	2017	18/12/2017	29	5	12	7	NA	107	25	0	53_4_1_19-Oct	0	0	0	1
53	5	1	bottom	NA	19	10	19-Oct	2017	18/12/2017	29	21	23	2	NA	108	25	0	53_5_1_19-Oct	0	0	0	1
53	5	1	top	NA	19	10	19-Oct	2017	18/12/2017	29	17	17	0	NA	109	25	0	53_5_1_19-Oct	0	0	0	1
53	6	1	bottom	NA	19	10	19-Oct	2017	18/12/2017	29	3	10	7	NA	110	25	0	53_6_1_19-Oct	0	0	0	1
53	6	1	top	NA	19	10	19-Oct	2017	18/12/2017	29	9	11	2	NA	111	25	0	53_6_1_19-Oct	0	0	0	1
53	7	1	bottom	NA	19	10	19-Oct	2017	18/12/2017	29	18	22	4	NA	112	25	0	53_7_1_19-Oct	0	0	0	1
53	7	1	top	NA	19	10	19-Oct	2017	18/12/2017	29	17	17	0	NA	113	25	0	53_7_1_19-Oct	0	0	0	1
53	8	1	bottom	NA	19	10	19-Oct	2017	18/12/2017	29	21	22	1	NA	114	25	0	53_8_1_19-Oct	0	0	0	1
53	8	1	top	NA	19	10	19-Oct	2017	18/12/2017	29	20	20	0	NA	115	25	0	53_8_1_19-Oct	0	0	0	1
53	9	1	bottom	NA	19	10	19-Oct	2017	18/12/2017	29	10	18	8	NA	116	25	0	53_9_1_19-Oct	0	0	0	1
53	9	1	top	NA	19	10	19-Oct	2017	18/12/2017	29	11	12	1	NA	117	25	0	53_9_1_19-Oct	0	0	0	1
53	10	1	bottom	NA	19	10	19-Oct	2017	18/12/2017	29	6	22	16	NA	118	25	0	53_10_1_19-Oct	0	0	0	1
53	10	1	top	NA	19	10	19-Oct	2017	18/12/2017	29	14	14	0	NA	119	25	0	53_10_1_19-Oct	0	0	0	0.928571429
182	1	1	bottom	NA	19	10	19-Oct	2017	18/12/2017	29	15	15	0	NA	160	26	0	182_1_1_19-Oct	0	0	0	0.866666667
182	1	1	top	NA	19	10	19-Oct	2017	18/12/2017	29	6	6	0	NA	161	26	0	182_1_1_19-Oct	0	0	0	1
182	1	10	bottom	NA	19	10	19-Oct	2017	18/12/2017	29	9	12	3	NA	176	26	1	182_1_10_19-Oct	8.333333333	11.11111111	0.111111111	0.888888889
182	1	10	top	NA	19	10	19-Oct	2017	18/12/2017	29	6	6	0	NA	177	26	0	182_1_10_19-Oct	0	0	0	0.833333333
182	1	2	bottom	NA	19	10	19-Oct	2017	18/12/2017	29	22	22	0	NA	178	26	0	182_1_2_19-Oct	0	0	0	0.863636364
182	1	2	top	NA	19	10	19-Oct	2017	18/12/2017	29	10	10	0	NA	179	26	0	182_1_2_19-Oct	0	0	0	1
182	1	3	bottom	NA	19	10	19-Oct	2017	18/12/2017	29	19	19	0	NA	162	26	1	182_1_3_19-Oct	5.263157895	5.263157895	0.052631579	0.789473684
182	1	3	top	NA	19	10	19-Oct	2017	18/12/2017	29	5	5	0	NA	163	26	0	182_1_3_19-Oct	0	0	0	0.6
182	1	4	bottom	NA	19	10	19-Oct	2017	18/12/2017	29	8	9	1	NA	164	26	0	182_1_4_19-Oct	0	0	0	0.875
182	1	4	top	NA	19	10	19-Oct	2017	18/12/2017	29	5	6	1	NA	165	26	0	182_1_4_19-Oct	0	0	0	1
182	1	5	bottom	NA	19	10	19-Oct	2017	18/12/2017	29	16	22	6	NA	166	26	0	182_1_5_19-Oct	0	0	0	0.6875
182	1	5	top	NA	19	10	19-Oct	2017	18/12/2017	29	12	15	3	NA	167	26	0	182_1_5_19-Oct	0	0	0	0.833333333
182	1	6	bottom	NA	19	10	19-Oct	2017	18/12/2017	29	15	15	0	NA	168	26	0	182_1_6_19-Oct	0	0	0	0.666666667
182	1	6	top	NA	19	10	19-Oct	2017	18/12/2017	29	10	12	2	NA	169	26	0	182_1_6_19-Oct	0	0	0	0.6
182	1	7	bottom	NA	19	10	19-Oct	2017	18/12/2017	29	20	20	0	NA	170	26	0	182_1_7_19-Oct	0	0	0	0.6
182	1	7	top	NA	19	10	19-Oct	2017	18/12/2017	29	17	17	0	NA	171	26	0	182_1_7_19-Oct	0	0	0	0.823529412
182	1	8	bottom	NA	19	10	19-Oct	2017	18/12/2017	29	12	12	0	NA	172	26	0	182_1_8_19-Oct	0	0	0	0.833333333
182	1	8	top	NA	19	10	19-Oct	2017	18/12/2017	29	9	9	0	NA	173	26	0	182_1_8_19-Oct	0	0	0	1
182	1	9	bottom	NA	19	10	19-Oct	2017	18/12/2017	29	14	14	0	NA	174	26	0	182_1_9_19-Oct	0	0	0	0.714285714
182	1	9	top	NA	19	10	19-Oct	2017	18/12/2017	29	17	17	0	NA	175	26	0	182_1_9_19-Oct	0	0	0	1
182	2	1	bottom	NA	19	10	19-Oct	2017	18/12/2017	29	16	16	0	NA	180	26	0	182_2_1_19-Oct	0	0	0	1
182	2	1	top	NA	19	10	19-Oct	2017	18/12/2017	29	13	13	0	NA	181	26	0	182_2_1_19-Oct	0	0	0	1
182	2	3	bottom	NA	19	10	19-Oct	2017	18/12/2017	29	9	9	0	NA	182	26	0	182_2_3_19-Oct	0	0	0	1
182	2	3	top	NA	19	10	19-Oct	2017	18/12/2017	29	10	10	0	NA	183	26	0	182_2_3_19-Oct	0	0	0	1
182	2	4	bottom	NA	19	10	19-Oct	2017	18/12/2017	29	13	14	1	NA	184	26	0	182_2_4_19-Oct	0	0	0	1
182	2	4	top	NA	19	10	19-Oct	2017	18/12/2017	29	14	14	0	NA	185	26	0	182_2_4_19-Oct	0	0	0	0.928571429
182	2	5	bottom	NA	19	10	19-Oct	2017	18/12/2017	29	18	18	0	NA	186	26	0	182_2_5_19-Oct	0	0	0	1
182	2	5	top	NA	19	10	19-Oct	2017	18/12/2017	29	12	13	1	NA	187	26	0	182_2_5_19-Oct	0	0	0	1
182	2	6	bottom	NA	19	10	19-Oct	2017	18/12/2017	29	11	20	9	NA	188	26	0	182_2_6_19-Oct	0	0	0	0.454545455
182	2	6	top	NA	19	10	19-Oct	2017	18/12/2017	29	16	18	2	NA	189	26	1	182_2_6_19-Oct	5.555555556	6.25	0.0625	0.5
182	2	7	bottom	NA	19	10	19-Oct	2017	18/12/2017	29	11	21	10	NA	190	26	0	182_2_7_19-Oct	0	0	0	0.545454545
182	2	7	top	NA	19	10	19-Oct	2017	18/12/2017	29	11	14	3	NA	191	26	0	182_2_7_19-Oct	0	0	0	0.727272727
182	3	1	bottom	NA	19	10	19-Oct	2017	18/12/2017	29	9	12	3	NA	192	26	0	182_3_1_19-Oct	0	0	0	0.444444444
182	3	1	top	NA	19	10	19-Oct	2017	18/12/2017	29	7	7	0	NA	193	26	0	182_3_1_19-Oct	0	0	0	1
182	3	3	bottom	NA	19	10	19-Oct	2017	18/12/2017	29	9	13	4	NA	194	26	0	182_3_3_19-Oct	0	0	0	0.666666667
182	3	3	top	NA	19	10	19-Oct	2017	18/12/2017	29	7	7	0	NA	195	26	0	182_3_3_19-Oct	0	0	0	0.428571429
182	3	4	bottom	NA	19	10	19-Oct	2017	18/12/2017	29	5	5	0	NA	196	26	0	182_3_4_19-Oct	0	0	0	0.6
182	3	4	top	NA	19	10	19-Oct	2017	18/12/2017	29	13	13	0	NA	197	26	0	182_3_4_19-Oct	0	0	0	0.769230769
182	3	5	bottom	NA	19	10	19-Oct	2017	18/12/2017	29	13	13	0	NA	198	26	0	182_3_5_19-Oct	0	0	0	0.384615385
182	3	5	top	NA	19	10	19-Oct	2017	18/12/2017	29	10	10	0	NA	199	26	0	182_3_5_19-Oct	0	0	0	1
182	3	6	bottom	NA	19	10	19-Oct	2017	18/12/2017	29	8	9	1	NA	200	26	0	182_3_6_19-Oct	0	0	0	0.25
182	3	6	top	NA	19	10	19-Oct	2017	18/12/2017	29	6	7	1	NA	201	26	0	182_3_6_19-Oct	0	0	0	0.5
182	3	7	bottom	NA	19	10	19-Oct	2017	18/12/2017	29	22	24	2	NA	202	26	0	182_3_7_19-Oct	0	0	0	0.363636364
182	3	7	top	NA	19	10	19-Oct	2017	18/12/2017	29	14	15	1	NA	203	26	0	182_3_7_19-Oct	0	0	0	0.642857143
53	1	1	bottom	NA	19	10	19-Oct	2017	18/12/2017	29	13	16	3	NA	100	26	0	53_1_1_19-Oct	0	0	0	1
53	1	1	top	NA	19	10	19-Oct	2017	18/12/2017	29	12	15	3	NA	101	26	0	53_1_1_19-Oct	0	0	0	1
53	2	1	bottom	NA	19	10	19-Oct	2017	18/12/2017	29	19	20	1	NA	102	26	0	53_2_1_19-Oct	0	0	0	1
53	2	1	top	NA	19	10	19-Oct	2017	18/12/2017	29	19	19	0	NA	103	26	0	53_2_1_19-Oct	0	0	0	1
53	3	1	bottom	NA	19	10	19-Oct	2017	18/12/2017	29	11	14	3	NA	104	26	0	53_3_1_19-Oct	0	0	0	0.727272727
53	3	1	top	NA	19	10	19-Oct	2017	18/12/2017	29	12	13	1	NA	105	26	0	53_3_1_19-Oct	0	0	0	0.75
53	4	1	bottom	NA	19	10	19-Oct	2017	18/12/2017	29	3	19	16	NA	106	26	0	53_4_1_19-Oct	0	0	0	1
53	4	1	top	NA	19	10	19-Oct	2017	18/12/2017	29	5	12	7	NA	107	26	0	53_4_1_19-Oct	0	0	0	1
53	5	1	bottom	NA	19	10	19-Oct	2017	18/12/2017	29	21	23	2	NA	108	26	0	53_5_1_19-Oct	0	0	0	1
53	5	1	top	NA	19	10	19-Oct	2017	18/12/2017	29	17	17	0	NA	109	26	0	53_5_1_19-Oct	0	0	0	1
53	6	1	bottom	NA	19	10	19-Oct	2017	18/12/2017	29	3	10	7	NA	110	26	0	53_6_1_19-Oct	0	0	0	1
53	6	1	top	NA	19	10	19-Oct	2017	18/12/2017	29	9	11	2	NA	111	26	0	53_6_1_19-Oct	0	0	0	1
53	7	1	bottom	NA	19	10	19-Oct	2017	18/12/2017	29	18	22	4	NA	112	26	0	53_7_1_19-Oct	0	0	0	1
53	7	1	top	NA	19	10	19-Oct	2017	18/12/2017	29	17	17	0	NA	113	26	0	53_7_1_19-Oct	0	0	0	1
53	8	1	bottom	NA	19	10	19-Oct	2017	18/12/2017	29	21	22	1	NA	114	26	0	53_8_1_19-Oct	0	0	0	1
53	8	1	top	NA	19	10	19-Oct	2017	18/12/2017	29	20	20	0	NA	115	26	0	53_8_1_19-Oct	0	0	0	1
53	9	1	bottom	NA	19	10	19-Oct	2017	18/12/2017	29	10	18	8	NA	116	26	0	53_9_1_19-Oct	0	0	0	1
53	9	1	top	NA	19	10	19-Oct	2017	18/12/2017	29	11	12	1	NA	117	26	0	53_9_1_19-Oct	0	0	0	1
53	10	1	bottom	NA	19	10	19-Oct	2017	18/12/2017	29	6	22	16	NA	118	26	0	53_10_1_19-Oct	0	0	0	1
53	10	1	top	NA	19	10	19-Oct	2017	18/12/2017	29	14	14	0	NA	119	26	0	53_10_1_19-Oct	0	0	0	0.928571429
182	1	1	bottom	NA	19	10	19-Oct	2017	18/12/2017	29	15	15	0	NA	160	27	1	182_1_1_19-Oct	6.666666667	6.666666667	0.066666667	0.933333333
182	1	1	top	NA	19	10	19-Oct	2017	18/12/2017	29	6	6	0	NA	161	27	0	182_1_1_19-Oct	0	0	0	1
182	1	10	bottom	NA	19	10	19-Oct	2017	18/12/2017	29	9	12	3	NA	176	27	0	182_1_10_19-Oct	0	0	0	0.888888889
182	1	10	top	NA	19	10	19-Oct	2017	18/12/2017	29	6	6	0	NA	177	27	0	182_1_10_19-Oct	0	0	0	0.833333333
182	1	2	bottom	NA	19	10	19-Oct	2017	18/12/2017	29	22	22	0	NA	178	27	0	182_1_2_19-Oct	0	0	0	0.863636364
182	1	2	top	NA	19	10	19-Oct	2017	18/12/2017	29	10	10	0	NA	179	27	0	182_1_2_19-Oct	0	0	0	1
182	1	3	bottom	NA	19	10	19-Oct	2017	18/12/2017	29	19	19	0	NA	162	27	0	182_1_3_19-Oct	0	0	0	0.789473684
182	1	3	top	NA	19	10	19-Oct	2017	18/12/2017	29	5	5	0	NA	163	27	0	182_1_3_19-Oct	0	0	0	0.6
182	1	4	bottom	NA	19	10	19-Oct	2017	18/12/2017	29	8	9	1	NA	164	27	0	182_1_4_19-Oct	0	0	0	0.875
182	1	4	top	NA	19	10	19-Oct	2017	18/12/2017	29	5	6	1	NA	165	27	0	182_1_4_19-Oct	0	0	0	1
182	1	5	bottom	NA	19	10	19-Oct	2017	18/12/2017	29	16	22	6	NA	166	27	0	182_1_5_19-Oct	0	0	0	0.6875
182	1	5	top	NA	19	10	19-Oct	2017	18/12/2017	29	12	15	3	NA	167	27	1	182_1_5_19-Oct	6.666666667	8.333333333	0.083333333	0.916666667
182	1	6	bottom	NA	19	10	19-Oct	2017	18/12/2017	29	15	15	0	NA	168	27	0	182_1_6_19-Oct	0	0	0	0.666666667
182	1	6	top	NA	19	10	19-Oct	2017	18/12/2017	29	10	12	2	NA	169	27	0	182_1_6_19-Oct	0	0	0	0.6
182	1	7	bottom	NA	19	10	19-Oct	2017	18/12/2017	29	20	20	0	NA	170	27	0	182_1_7_19-Oct	0	0	0	0.6
182	1	7	top	NA	19	10	19-Oct	2017	18/12/2017	29	17	17	0	NA	171	27	0	182_1_7_19-Oct	0	0	0	0.823529412
182	1	8	bottom	NA	19	10	19-Oct	2017	18/12/2017	29	12	12	0	NA	172	27	0	182_1_8_19-Oct	0	0	0	0.833333333
182	1	8	top	NA	19	10	19-Oct	2017	18/12/2017	29	9	9	0	NA	173	27	0	182_1_8_19-Oct	0	0	0	1
182	1	9	bottom	NA	19	10	19-Oct	2017	18/12/2017	29	14	14	0	NA	174	27	1	182_1_9_19-Oct	7.142857143	7.142857143	0.071428571	0.785714286
182	1	9	top	NA	19	10	19-Oct	2017	18/12/2017	29	17	17	0	NA	175	27	0	182_1_9_19-Oct	0	0	0	1
182	2	1	bottom	NA	19	10	19-Oct	2017	18/12/2017	29	16	16	0	NA	180	27	0	182_2_1_19-Oct	0	0	0	1
182	2	1	top	NA	19	10	19-Oct	2017	18/12/2017	29	13	13	0	NA	181	27	0	182_2_1_19-Oct	0	0	0	1
182	2	3	bottom	NA	19	10	19-Oct	2017	18/12/2017	29	9	9	0	NA	182	27	0	182_2_3_19-Oct	0	0	0	1
182	2	3	top	NA	19	10	19-Oct	2017	18/12/2017	29	10	10	0	NA	183	27	0	182_2_3_19-Oct	0	0	0	1
182	2	4	bottom	NA	19	10	19-Oct	2017	18/12/2017	29	13	14	1	NA	184	27	0	182_2_4_19-Oct	0	0	0	1
182	2	4	top	NA	19	10	19-Oct	2017	18/12/2017	29	14	14	0	NA	185	27	0	182_2_4_19-Oct	0	0	0	0.928571429
182	2	5	bottom	NA	19	10	19-Oct	2017	18/12/2017	29	18	18	0	NA	186	27	0	182_2_5_19-Oct	0	0	0	1
182	2	5	top	NA	19	10	19-Oct	2017	18/12/2017	29	12	13	1	NA	187	27	0	182_2_5_19-Oct	0	0	0	1
182	2	6	bottom	NA	19	10	19-Oct	2017	18/12/2017	29	11	20	9	NA	188	27	1	182_2_6_19-Oct	5	9.090909091	0.090909091	0.545454545
182	2	6	top	NA	19	10	19-Oct	2017	18/12/2017	29	16	18	2	NA	189	27	0	182_2_6_19-Oct	0	0	0	0.5
182	2	7	bottom	NA	19	10	19-Oct	2017	18/12/2017	29	11	21	10	NA	190	27	0	182_2_7_19-Oct	0	0	0	0.545454545
182	2	7	top	NA	19	10	19-Oct	2017	18/12/2017	29	11	14	3	NA	191	27	0	182_2_7_19-Oct	0	0	0	0.727272727
182	3	1	bottom	NA	19	10	19-Oct	2017	18/12/2017	29	9	12	3	NA	192	27	0	182_3_1_19-Oct	0	0	0	0.444444444
182	3	1	top	NA	19	10	19-Oct	2017	18/12/2017	29	7	7	0	NA	193	27	0	182_3_1_19-Oct	0	0	0	1
182	3	3	bottom	NA	19	10	19-Oct	2017	18/12/2017	29	9	13	4	NA	194	27	0	182_3_3_19-Oct	0	0	0	0.666666667
182	3	3	top	NA	19	10	19-Oct	2017	18/12/2017	29	7	7	0	NA	195	27	0	182_3_3_19-Oct	0	0	0	0.428571429
182	3	4	bottom	NA	19	10	19-Oct	2017	18/12/2017	29	5	5	0	NA	196	27	0	182_3_4_19-Oct	0	0	0	0.6
182	3	4	top	NA	19	10	19-Oct	2017	18/12/2017	29	13	13	0	NA	197	27	1	182_3_4_19-Oct	7.692307692	7.692307692	0.076923077	0.846153846
182	3	5	bottom	NA	19	10	19-Oct	2017	18/12/2017	29	13	13	0	NA	198	27	0	182_3_5_19-Oct	0	0	0	0.384615385
182	3	5	top	NA	19	10	19-Oct	2017	18/12/2017	29	10	10	0	NA	199	27	0	182_3_5_19-Oct	0	0	0	1
182	3	6	bottom	NA	19	10	19-Oct	2017	18/12/2017	29	8	9	1	NA	200	27	0	182_3_6_19-Oct	0	0	0	0.25
182	3	6	top	NA	19	10	19-Oct	2017	18/12/2017	29	6	7	1	NA	201	27	0	182_3_6_19-Oct	0	0	0	0.5
182	3	7	bottom	NA	19	10	19-Oct	2017	18/12/2017	29	22	24	2	NA	202	27	0	182_3_7_19-Oct	0	0	0	0.363636364
182	3	7	top	NA	19	10	19-Oct	2017	18/12/2017	29	14	15	1	NA	203	27	0	182_3_7_19-Oct	0	0	0	0.642857143
53	1	1	bottom	NA	19	10	19-Oct	2017	18/12/2017	29	13	16	3	NA	100	27	0	53_1_1_19-Oct	0	0	0	1
53	1	1	top	NA	19	10	19-Oct	2017	18/12/2017	29	12	15	3	NA	101	27	0	53_1_1_19-Oct	0	0	0	1
53	2	1	bottom	NA	19	10	19-Oct	2017	18/12/2017	29	19	20	1	NA	102	27	0	53_2_1_19-Oct	0	0	0	1
53	2	1	top	NA	19	10	19-Oct	2017	18/12/2017	29	19	19	0	NA	103	27	0	53_2_1_19-Oct	0	0	0	1
53	3	1	bottom	NA	19	10	19-Oct	2017	18/12/2017	29	11	14	3	NA	104	27	0	53_3_1_19-Oct	0	0	0	0.727272727
53	3	1	top	NA	19	10	19-Oct	2017	18/12/2017	29	12	13	1	NA	105	27	0	53_3_1_19-Oct	0	0	0	0.75
53	4	1	bottom	NA	19	10	19-Oct	2017	18/12/2017	29	3	19	16	NA	106	27	0	53_4_1_19-Oct	0	0	0	1
53	4	1	top	NA	19	10	19-Oct	2017	18/12/2017	29	5	12	7	NA	107	27	0	53_4_1_19-Oct	0	0	0	1
53	5	1	bottom	NA	19	10	19-Oct	2017	18/12/2017	29	21	23	2	NA	108	27	0	53_5_1_19-Oct	0	0	0	1
53	5	1	top	NA	19	10	19-Oct	2017	18/12/2017	29	17	17	0	NA	109	27	0	53_5_1_19-Oct	0	0	0	1
53	6	1	bottom	NA	19	10	19-Oct	2017	18/12/2017	29	3	10	7	NA	110	27	0	53_6_1_19-Oct	0	0	0	1
53	6	1	top	NA	19	10	19-Oct	2017	18/12/2017	29	9	11	2	NA	111	27	0	53_6_1_19-Oct	0	0	0	1
53	7	1	bottom	NA	19	10	19-Oct	2017	18/12/2017	29	18	22	4	NA	112	27	0	53_7_1_19-Oct	0	0	0	1
53	7	1	top	NA	19	10	19-Oct	2017	18/12/2017	29	17	17	0	NA	113	27	0	53_7_1_19-Oct	0	0	0	1
53	8	1	bottom	NA	19	10	19-Oct	2017	18/12/2017	29	21	22	1	NA	114	27	0	53_8_1_19-Oct	0	0	0	1
53	8	1	top	NA	19	10	19-Oct	2017	18/12/2017	29	20	20	0	NA	115	27	0	53_8_1_19-Oct	0	0	0	1
53	9	1	bottom	NA	19	10	19-Oct	2017	18/12/2017	29	10	18	8	NA	116	27	0	53_9_1_19-Oct	0	0	0	1
53	9	1	top	NA	19	10	19-Oct	2017	18/12/2017	29	11	12	1	NA	117	27	0	53_9_1_19-Oct	0	0	0	1
53	10	1	bottom	NA	19	10	19-Oct	2017	18/12/2017	29	6	22	16	NA	118	27	0	53_10_1_19-Oct	0	0	0	1
53	10	1	top	NA	19	10	19-Oct	2017	18/12/2017	29	14	14	0	NA	119	27	0	53_10_1_19-Oct	0	0	0	0.928571429
182	1	1	bottom	NA	19	10	19-Oct	2017	18/12/2017	29	15	15	0	NA	160	28	0	182_1_1_19-Oct	0	0	0	0.933333333
182	1	1	top	NA	19	10	19-Oct	2017	18/12/2017	29	6	6	0	NA	161	28	0	182_1_1_19-Oct	0	0	0	1
182	1	10	bottom	NA	19	10	19-Oct	2017	18/12/2017	29	9	12	3	NA	176	28	0	182_1_10_19-Oct	0	0	0	0.888888889
182	1	10	top	NA	19	10	19-Oct	2017	18/12/2017	29	6	6	0	NA	177	28	0	182_1_10_19-Oct	0	0	0	0.833333333
182	1	2	bottom	NA	19	10	19-Oct	2017	18/12/2017	29	22	22	0	NA	178	28	0	182_1_2_19-Oct	0	0	0	0.863636364
182	1	2	top	NA	19	10	19-Oct	2017	18/12/2017	29	10	10	0	NA	179	28	0	182_1_2_19-Oct	0	0	0	1
182	1	3	bottom	NA	19	10	19-Oct	2017	18/12/2017	29	19	19	0	NA	162	28	0	182_1_3_19-Oct	0	0	0	0.789473684
182	1	3	top	NA	19	10	19-Oct	2017	18/12/2017	29	5	5	0	NA	163	28	0	182_1_3_19-Oct	0	0	0	0.6
182	1	4	bottom	NA	19	10	19-Oct	2017	18/12/2017	29	8	9	1	NA	164	28	0	182_1_4_19-Oct	0	0	0	0.875
182	1	4	top	NA	19	10	19-Oct	2017	18/12/2017	29	5	6	1	NA	165	28	0	182_1_4_19-Oct	0	0	0	1
182	1	5	bottom	NA	19	10	19-Oct	2017	18/12/2017	29	16	22	6	NA	166	28	0	182_1_5_19-Oct	0	0	0	0.6875
182	1	5	top	NA	19	10	19-Oct	2017	18/12/2017	29	12	15	3	NA	167	28	0	182_1_5_19-Oct	0	0	0	0.916666667
182	1	6	bottom	NA	19	10	19-Oct	2017	18/12/2017	29	15	15	0	NA	168	28	0	182_1_6_19-Oct	0	0	0	0.666666667
182	1	6	top	NA	19	10	19-Oct	2017	18/12/2017	29	10	12	2	NA	169	28	0	182_1_6_19-Oct	0	0	0	0.6
182	1	7	bottom	NA	19	10	19-Oct	2017	18/12/2017	29	20	20	0	NA	170	28	0	182_1_7_19-Oct	0	0	0	0.6
182	1	7	top	NA	19	10	19-Oct	2017	18/12/2017	29	17	17	0	NA	171	28	0	182_1_7_19-Oct	0	0	0	0.823529412
182	1	8	bottom	NA	19	10	19-Oct	2017	18/12/2017	29	12	12	0	NA	172	28	0	182_1_8_19-Oct	0	0	0	0.833333333
182	1	8	top	NA	19	10	19-Oct	2017	18/12/2017	29	9	9	0	NA	173	28	0	182_1_8_19-Oct	0	0	0	1
182	1	9	bottom	NA	19	10	19-Oct	2017	18/12/2017	29	14	14	0	NA	174	28	0	182_1_9_19-Oct	0	0	0	0.785714286
182	1	9	top	NA	19	10	19-Oct	2017	18/12/2017	29	17	17	0	NA	175	28	0	182_1_9_19-Oct	0	0	0	1
182	2	1	bottom	NA	19	10	19-Oct	2017	18/12/2017	29	16	16	0	NA	180	28	0	182_2_1_19-Oct	0	0	0	1
182	2	1	top	NA	19	10	19-Oct	2017	18/12/2017	29	13	13	0	NA	181	28	0	182_2_1_19-Oct	0	0	0	1
182	2	3	bottom	NA	19	10	19-Oct	2017	18/12/2017	29	9	9	0	NA	182	28	0	182_2_3_19-Oct	0	0	0	1
182	2	3	top	NA	19	10	19-Oct	2017	18/12/2017	29	10	10	0	NA	183	28	0	182_2_3_19-Oct	0	0	0	1
182	2	4	bottom	NA	19	10	19-Oct	2017	18/12/2017	29	13	14	1	NA	184	28	0	182_2_4_19-Oct	0	0	0	1
182	2	4	top	NA	19	10	19-Oct	2017	18/12/2017	29	14	14	0	NA	185	28	0	182_2_4_19-Oct	0	0	0	0.928571429
182	2	5	bottom	NA	19	10	19-Oct	2017	18/12/2017	29	18	18	0	NA	186	28	0	182_2_5_19-Oct	0	0	0	1
182	2	5	top	NA	19	10	19-Oct	2017	18/12/2017	29	12	13	1	NA	187	28	0	182_2_5_19-Oct	0	0	0	1
182	2	6	bottom	NA	19	10	19-Oct	2017	18/12/2017	29	11	20	9	NA	188	28	0	182_2_6_19-Oct	0	0	0	0.545454545
182	2	6	top	NA	19	10	19-Oct	2017	18/12/2017	29	16	18	2	NA	189	28	0	182_2_6_19-Oct	0	0	0	0.5
182	2	7	bottom	NA	19	10	19-Oct	2017	18/12/2017	29	11	21	10	NA	190	28	0	182_2_7_19-Oct	0	0	0	0.545454545
182	2	7	top	NA	19	10	19-Oct	2017	18/12/2017	29	11	14	3	NA	191	28	0	182_2_7_19-Oct	0	0	0	0.727272727
182	3	1	bottom	NA	19	10	19-Oct	2017	18/12/2017	29	9	12	3	NA	192	28	0	182_3_1_19-Oct	0	0	0	0.444444444
182	3	1	top	NA	19	10	19-Oct	2017	18/12/2017	29	7	7	0	NA	193	28	0	182_3_1_19-Oct	0	0	0	1
182	3	3	bottom	NA	19	10	19-Oct	2017	18/12/2017	29	9	13	4	NA	194	28	0	182_3_3_19-Oct	0	0	0	0.666666667
182	3	3	top	NA	19	10	19-Oct	2017	18/12/2017	29	7	7	0	NA	195	28	0	182_3_3_19-Oct	0	0	0	0.428571429
182	3	4	bottom	NA	19	10	19-Oct	2017	18/12/2017	29	5	5	0	NA	196	28	0	182_3_4_19-Oct	0	0	0	0.6
182	3	4	top	NA	19	10	19-Oct	2017	18/12/2017	29	13	13	0	NA	197	28	0	182_3_4_19-Oct	0	0	0	0.846153846
182	3	5	bottom	NA	19	10	19-Oct	2017	18/12/2017	29	13	13	0	NA	198	28	0	182_3_5_19-Oct	0	0	0	0.384615385
182	3	5	top	NA	19	10	19-Oct	2017	18/12/2017	29	10	10	0	NA	199	28	0	182_3_5_19-Oct	0	0	0	1
182	3	6	bottom	NA	19	10	19-Oct	2017	18/12/2017	29	8	9	1	NA	200	28	0	182_3_6_19-Oct	0	0	0	0.25
182	3	6	top	NA	19	10	19-Oct	2017	18/12/2017	29	6	7	1	NA	201	28	0	182_3_6_19-Oct	0	0	0	0.5
182	3	7	bottom	NA	19	10	19-Oct	2017	18/12/2017	29	22	24	2	NA	202	28	1	182_3_7_19-Oct	4.166666667	4.545454545	0.045454545	0.409090909
182	3	7	top	NA	19	10	19-Oct	2017	18/12/2017	29	14	15	1	NA	203	28	0	182_3_7_19-Oct	0	0	0	0.642857143
53	1	1	bottom	NA	19	10	19-Oct	2017	18/12/2017	29	13	16	3	NA	100	28	0	53_1_1_19-Oct	0	0	0	1
53	1	1	top	NA	19	10	19-Oct	2017	18/12/2017	29	12	15	3	NA	101	28	0	53_1_1_19-Oct	0	0	0	1
53	2	1	bottom	NA	19	10	19-Oct	2017	18/12/2017	29	19	20	1	NA	102	28	0	53_2_1_19-Oct	0	0	0	1
53	2	1	top	NA	19	10	19-Oct	2017	18/12/2017	29	19	19	0	NA	103	28	0	53_2_1_19-Oct	0	0	0	1
53	3	1	bottom	NA	19	10	19-Oct	2017	18/12/2017	29	11	14	3	NA	104	28	0	53_3_1_19-Oct	0	0	0	0.727272727
53	3	1	top	NA	19	10	19-Oct	2017	18/12/2017	29	12	13	1	NA	105	28	0	53_3_1_19-Oct	0	0	0	0.75
53	4	1	bottom	NA	19	10	19-Oct	2017	18/12/2017	29	3	19	16	NA	106	28	0	53_4_1_19-Oct	0	0	0	1
53	4	1	top	NA	19	10	19-Oct	2017	18/12/2017	29	5	12	7	NA	107	28	0	53_4_1_19-Oct	0	0	0	1
53	5	1	bottom	NA	19	10	19-Oct	2017	18/12/2017	29	21	23	2	NA	108	28	0	53_5_1_19-Oct	0	0	0	1
53	5	1	top	NA	19	10	19-Oct	2017	18/12/2017	29	17	17	0	NA	109	28	0	53_5_1_19-Oct	0	0	0	1
53	6	1	bottom	NA	19	10	19-Oct	2017	18/12/2017	29	3	10	7	NA	110	28	0	53_6_1_19-Oct	0	0	0	1
53	6	1	top	NA	19	10	19-Oct	2017	18/12/2017	29	9	11	2	NA	111	28	0	53_6_1_19-Oct	0	0	0	1
53	7	1	bottom	NA	19	10	19-Oct	2017	18/12/2017	29	18	22	4	NA	112	28	0	53_7_1_19-Oct	0	0	0	1
53	7	1	top	NA	19	10	19-Oct	2017	18/12/2017	29	17	17	0	NA	113	28	0	53_7_1_19-Oct	0	0	0	1
53	8	1	bottom	NA	19	10	19-Oct	2017	18/12/2017	29	21	22	1	NA	114	28	0	53_8_1_19-Oct	0	0	0	1
53	8	1	top	NA	19	10	19-Oct	2017	18/12/2017	29	20	20	0	NA	115	28	0	53_8_1_19-Oct	0	0	0	1
53	9	1	bottom	NA	19	10	19-Oct	2017	18/12/2017	29	10	18	8	NA	116	28	0	53_9_1_19-Oct	0	0	0	1
53	9	1	top	NA	19	10	19-Oct	2017	18/12/2017	29	11	12	1	NA	117	28	0	53_9_1_19-Oct	0	0	0	1
53	10	1	bottom	NA	19	10	19-Oct	2017	18/12/2017	29	6	22	16	NA	118	28	0	53_10_1_19-Oct	0	0	0	1
53	10	1	top	NA	19	10	19-Oct	2017	18/12/2017	29	14	14	0	NA	119	28	0	53_10_1_19-Oct	0	0	0	0.928571429
182	1	1	bottom	NA	19	10	19-Oct	2017	18/12/2017	29	15	15	0	NA	160	29	0	182_1_1_19-Oct	0	0	0	0.933333333
182	1	1	top	NA	19	10	19-Oct	2017	18/12/2017	29	6	6	0	NA	161	29	0	182_1_1_19-Oct	0	0	0	1
182	1	10	bottom	NA	19	10	19-Oct	2017	18/12/2017	29	9	12	3	NA	176	29	0	182_1_10_19-Oct	0	0	0	0.888888889
182	1	10	top	NA	19	10	19-Oct	2017	18/12/2017	29	6	6	0	NA	177	29	0	182_1_10_19-Oct	0	0	0	0.833333333
182	1	2	bottom	NA	19	10	19-Oct	2017	18/12/2017	29	22	22	0	NA	178	29	0	182_1_2_19-Oct	0	0	0	0.863636364
182	1	2	top	NA	19	10	19-Oct	2017	18/12/2017	29	10	10	0	NA	179	29	0	182_1_2_19-Oct	0	0	0	1
182	1	3	bottom	NA	19	10	19-Oct	2017	18/12/2017	29	19	19	0	NA	162	29	0	182_1_3_19-Oct	0	0	0	0.789473684
182	1	3	top	NA	19	10	19-Oct	2017	18/12/2017	29	5	5	0	NA	163	29	0	182_1_3_19-Oct	0	0	0	0.6
182	1	4	bottom	NA	19	10	19-Oct	2017	18/12/2017	29	8	9	1	NA	164	29	0	182_1_4_19-Oct	0	0	0	0.875
182	1	4	top	NA	19	10	19-Oct	2017	18/12/2017	29	5	6	1	NA	165	29	0	182_1_4_19-Oct	0	0	0	1
182	1	5	bottom	NA	19	10	19-Oct	2017	18/12/2017	29	16	22	6	NA	166	29	0	182_1_5_19-Oct	0	0	0	0.6875
182	1	5	top	NA	19	10	19-Oct	2017	18/12/2017	29	12	15	3	NA	167	29	0	182_1_5_19-Oct	0	0	0	0.916666667
182	1	6	bottom	NA	19	10	19-Oct	2017	18/12/2017	29	15	15	0	NA	168	29	0	182_1_6_19-Oct	0	0	0	0.666666667
182	1	6	top	NA	19	10	19-Oct	2017	18/12/2017	29	10	12	2	NA	169	29	0	182_1_6_19-Oct	0	0	0	0.6
182	1	7	bottom	NA	19	10	19-Oct	2017	18/12/2017	29	20	20	0	NA	170	29	0	182_1_7_19-Oct	0	0	0	0.6
182	1	7	top	NA	19	10	19-Oct	2017	18/12/2017	29	17	17	0	NA	171	29	0	182_1_7_19-Oct	0	0	0	0.823529412
182	1	8	bottom	NA	19	10	19-Oct	2017	18/12/2017	29	12	12	0	NA	172	29	0	182_1_8_19-Oct	0	0	0	0.833333333
182	1	8	top	NA	19	10	19-Oct	2017	18/12/2017	29	9	9	0	NA	173	29	0	182_1_8_19-Oct	0	0	0	1
182	1	9	bottom	NA	19	10	19-Oct	2017	18/12/2017	29	14	14	0	NA	174	29	0	182_1_9_19-Oct	0	0	0	0.785714286
182	1	9	top	NA	19	10	19-Oct	2017	18/12/2017	29	17	17	0	NA	175	29	0	182_1_9_19-Oct	0	0	0	1
182	2	1	bottom	NA	19	10	19-Oct	2017	18/12/2017	29	16	16	0	NA	180	29	0	182_2_1_19-Oct	0	0	0	1
182	2	1	top	NA	19	10	19-Oct	2017	18/12/2017	29	13	13	0	NA	181	29	0	182_2_1_19-Oct	0	0	0	1
182	2	3	bottom	NA	19	10	19-Oct	2017	18/12/2017	29	9	9	0	NA	182	29	0	182_2_3_19-Oct	0	0	0	1
182	2	3	top	NA	19	10	19-Oct	2017	18/12/2017	29	10	10	0	NA	183	29	0	182_2_3_19-Oct	0	0	0	1
182	2	4	bottom	NA	19	10	19-Oct	2017	18/12/2017	29	13	14	1	NA	184	29	0	182_2_4_19-Oct	0	0	0	1
182	2	4	top	NA	19	10	19-Oct	2017	18/12/2017	29	14	14	0	NA	185	29	0	182_2_4_19-Oct	0	0	0	0.928571429
182	2	5	bottom	NA	19	10	19-Oct	2017	18/12/2017	29	18	18	0	NA	186	29	0	182_2_5_19-Oct	0	0	0	1
182	2	5	top	NA	19	10	19-Oct	2017	18/12/2017	29	12	13	1	NA	187	29	0	182_2_5_19-Oct	0	0	0	1
182	2	6	bottom	NA	19	10	19-Oct	2017	18/12/2017	29	11	20	9	NA	188	29	1	182_2_6_19-Oct	5	9.090909091	0.090909091	0.636363636
182	2	6	top	NA	19	10	19-Oct	2017	18/12/2017	29	16	18	2	NA	189	29	1	182_2_6_19-Oct	5.555555556	6.25	0.0625	0.5625
182	2	7	bottom	NA	19	10	19-Oct	2017	18/12/2017	29	11	21	10	NA	190	29	0	182_2_7_19-Oct	0	0	0	0.545454545
182	2	7	top	NA	19	10	19-Oct	2017	18/12/2017	29	11	14	3	NA	191	29	0	182_2_7_19-Oct	0	0	0	0.727272727
182	3	1	bottom	NA	19	10	19-Oct	2017	18/12/2017	29	9	12	3	NA	192	29	0	182_3_1_19-Oct	0	0	0	0.444444444
182	3	1	top	NA	19	10	19-Oct	2017	18/12/2017	29	7	7	0	NA	193	29	0	182_3_1_19-Oct	0	0	0	1
182	3	3	bottom	NA	19	10	19-Oct	2017	18/12/2017	29	9	13	4	NA	194	29	1	182_3_3_19-Oct	7.692307692	11.11111111	0.111111111	0.777777778
182	3	3	top	NA	19	10	19-Oct	2017	18/12/2017	29	7	7	0	NA	195	29	0	182_3_3_19-Oct	0	0	0	0.428571429
182	3	4	bottom	NA	19	10	19-Oct	2017	18/12/2017	29	5	5	0	NA	196	29	0	182_3_4_19-Oct	0	0	0	0.6
182	3	4	top	NA	19	10	19-Oct	2017	18/12/2017	29	13	13	0	NA	197	29	0	182_3_4_19-Oct	0	0	0	0.846153846
182	3	5	bottom	NA	19	10	19-Oct	2017	18/12/2017	29	13	13	0	NA	198	29	0	182_3_5_19-Oct	0	0	0	0.384615385
182	3	5	top	NA	19	10	19-Oct	2017	18/12/2017	29	10	10	0	NA	199	29	0	182_3_5_19-Oct	0	0	0	1
182	3	6	bottom	NA	19	10	19-Oct	2017	18/12/2017	29	8	9	1	NA	200	29	0	182_3_6_19-Oct	0	0	0	0.25
182	3	6	top	NA	19	10	19-Oct	2017	18/12/2017	29	6	7	1	NA	201	29	0	182_3_6_19-Oct	0	0	0	0.5
182	3	7	bottom	NA	19	10	19-Oct	2017	18/12/2017	29	22	24	2	NA	202	29	0	182_3_7_19-Oct	0	0	0	0.409090909
182	3	7	top	NA	19	10	19-Oct	2017	18/12/2017	29	14	15	1	NA	203	29	1	182_3_7_19-Oct	6.666666667	7.142857143	0.071428571	0.714285714
53	1	1	bottom	NA	19	10	19-Oct	2017	18/12/2017	29	13	16	3	NA	100	29	0	53_1_1_19-Oct	0	0	0	1
53	1	1	top	NA	19	10	19-Oct	2017	18/12/2017	29	12	15	3	NA	101	29	0	53_1_1_19-Oct	0	0	0	1
53	2	1	bottom	NA	19	10	19-Oct	2017	18/12/2017	29	19	20	1	NA	102	29	0	53_2_1_19-Oct	0	0	0	1
53	2	1	top	NA	19	10	19-Oct	2017	18/12/2017	29	19	19	0	NA	103	29	0	53_2_1_19-Oct	0	0	0	1
53	3	1	bottom	NA	19	10	19-Oct	2017	18/12/2017	29	11	14	3	NA	104	29	0	53_3_1_19-Oct	0	0	0	0.727272727
53	3	1	top	NA	19	10	19-Oct	2017	18/12/2017	29	12	13	1	NA	105	29	0	53_3_1_19-Oct	0	0	0	0.75
53	4	1	bottom	NA	19	10	19-Oct	2017	18/12/2017	29	3	19	16	NA	106	29	0	53_4_1_19-Oct	0	0	0	1
53	4	1	top	NA	19	10	19-Oct	2017	18/12/2017	29	5	12	7	NA	107	29	0	53_4_1_19-Oct	0	0	0	1
53	5	1	bottom	NA	19	10	19-Oct	2017	18/12/2017	29	21	23	2	NA	108	29	0	53_5_1_19-Oct	0	0	0	1
53	5	1	top	NA	19	10	19-Oct	2017	18/12/2017	29	17	17	0	NA	109	29	0	53_5_1_19-Oct	0	0	0	1
53	6	1	bottom	NA	19	10	19-Oct	2017	18/12/2017	29	3	10	7	NA	110	29	0	53_6_1_19-Oct	0	0	0	1
53	6	1	top	NA	19	10	19-Oct	2017	18/12/2017	29	9	11	2	NA	111	29	0	53_6_1_19-Oct	0	0	0	1
53	7	1	bottom	NA	19	10	19-Oct	2017	18/12/2017	29	18	22	4	NA	112	29	0	53_7_1_19-Oct	0	0	0	1
53	7	1	top	NA	19	10	19-Oct	2017	18/12/2017	29	17	17	0	NA	113	29	0	53_7_1_19-Oct	0	0	0	1
53	8	1	bottom	NA	19	10	19-Oct	2017	18/12/2017	29	21	22	1	NA	114	29	0	53_8_1_19-Oct	0	0	0	1
53	8	1	top	NA	19	10	19-Oct	2017	18/12/2017	29	20	20	0	NA	115	29	0	53_8_1_19-Oct	0	0	0	1
53	9	1	bottom	NA	19	10	19-Oct	2017	18/12/2017	29	10	18	8	NA	116	29	0	53_9_1_19-Oct	0	0	0	1
53	9	1	top	NA	19	10	19-Oct	2017	18/12/2017	29	11	12	1	NA	117	29	0	53_9_1_19-Oct	0	0	0	1
53	10	1	bottom	NA	19	10	19-Oct	2017	18/12/2017	29	6	22	16	NA	118	29	0	53_10_1_19-Oct	0	0	0	1
53	10	1	top	NA	19	10	19-Oct	2017	18/12/2017	29	14	14	0	NA	119	29	0	53_10_1_19-Oct	0	0	0	0.928571429
182	1	1	bottom	NA	19	10	19-Oct	2017	18/12/2017	29	15	15	0	NA	160	30	0	182_1_1_19-Oct	0	0	0	0.933333333
182	1	1	top	NA	19	10	19-Oct	2017	18/12/2017	29	6	6	0	NA	161	30	0	182_1_1_19-Oct	0	0	0	1
182	1	10	bottom	NA	19	10	19-Oct	2017	18/12/2017	29	9	12	3	NA	176	30	0	182_1_10_19-Oct	0	0	0	0.888888889
182	1	10	top	NA	19	10	19-Oct	2017	18/12/2017	29	6	6	0	NA	177	30	0	182_1_10_19-Oct	0	0	0	0.833333333
182	1	2	bottom	NA	19	10	19-Oct	2017	18/12/2017	29	22	22	0	NA	178	30	0	182_1_2_19-Oct	0	0	0	0.863636364
182	1	2	top	NA	19	10	19-Oct	2017	18/12/2017	29	10	10	0	NA	179	30	0	182_1_2_19-Oct	0	0	0	1
182	1	3	bottom	NA	19	10	19-Oct	2017	18/12/2017	29	19	19	0	NA	162	30	0	182_1_3_19-Oct	0	0	0	0.789473684
182	1	3	top	NA	19	10	19-Oct	2017	18/12/2017	29	5	5	0	NA	163	30	0	182_1_3_19-Oct	0	0	0	0.6
182	1	4	bottom	NA	19	10	19-Oct	2017	18/12/2017	29	8	9	1	NA	164	30	0	182_1_4_19-Oct	0	0	0	0.875
182	1	4	top	NA	19	10	19-Oct	2017	18/12/2017	29	5	6	1	NA	165	30	0	182_1_4_19-Oct	0	0	0	1
182	1	5	bottom	NA	19	10	19-Oct	2017	18/12/2017	29	16	22	6	NA	166	30	0	182_1_5_19-Oct	0	0	0	0.6875
182	1	5	top	NA	19	10	19-Oct	2017	18/12/2017	29	12	15	3	NA	167	30	0	182_1_5_19-Oct	0	0	0	0.916666667
182	1	6	bottom	NA	19	10	19-Oct	2017	18/12/2017	29	15	15	0	NA	168	30	0	182_1_6_19-Oct	0	0	0	0.666666667
182	1	6	top	NA	19	10	19-Oct	2017	18/12/2017	29	10	12	2	NA	169	30	0	182_1_6_19-Oct	0	0	0	0.6
182	1	7	bottom	NA	19	10	19-Oct	2017	18/12/2017	29	20	20	0	NA	170	30	0	182_1_7_19-Oct	0	0	0	0.6
182	1	7	top	NA	19	10	19-Oct	2017	18/12/2017	29	17	17	0	NA	171	30	0	182_1_7_19-Oct	0	0	0	0.823529412
182	1	8	bottom	NA	19	10	19-Oct	2017	18/12/2017	29	12	12	0	NA	172	30	0	182_1_8_19-Oct	0	0	0	0.833333333
182	1	8	top	NA	19	10	19-Oct	2017	18/12/2017	29	9	9	0	NA	173	30	0	182_1_8_19-Oct	0	0	0	1
182	1	9	bottom	NA	19	10	19-Oct	2017	18/12/2017	29	14	14	0	NA	174	30	0	182_1_9_19-Oct	0	0	0	0.785714286
182	1	9	top	NA	19	10	19-Oct	2017	18/12/2017	29	17	17	0	NA	175	30	0	182_1_9_19-Oct	0	0	0	1
182	2	1	bottom	NA	19	10	19-Oct	2017	18/12/2017	29	16	16	0	NA	180	30	0	182_2_1_19-Oct	0	0	0	1
182	2	1	top	NA	19	10	19-Oct	2017	18/12/2017	29	13	13	0	NA	181	30	0	182_2_1_19-Oct	0	0	0	1
182	2	3	bottom	NA	19	10	19-Oct	2017	18/12/2017	29	9	9	0	NA	182	30	0	182_2_3_19-Oct	0	0	0	1
182	2	3	top	NA	19	10	19-Oct	2017	18/12/2017	29	10	10	0	NA	183	30	0	182_2_3_19-Oct	0	0	0	1
182	2	4	bottom	NA	19	10	19-Oct	2017	18/12/2017	29	13	14	1	NA	184	30	0	182_2_4_19-Oct	0	0	0	1
182	2	4	top	NA	19	10	19-Oct	2017	18/12/2017	29	14	14	0	NA	185	30	0	182_2_4_19-Oct	0	0	0	0.928571429
182	2	5	bottom	NA	19	10	19-Oct	2017	18/12/2017	29	18	18	0	NA	186	30	0	182_2_5_19-Oct	0	0	0	1
182	2	5	top	NA	19	10	19-Oct	2017	18/12/2017	29	12	13	1	NA	187	30	0	182_2_5_19-Oct	0	0	0	1
182	2	6	bottom	NA	19	10	19-Oct	2017	18/12/2017	29	11	20	9	NA	188	30	0	182_2_6_19-Oct	0	0	0	0.636363636
182	2	6	top	NA	19	10	19-Oct	2017	18/12/2017	29	16	18	2	NA	189	30	0	182_2_6_19-Oct	0	0	0	0.5625
182	2	7	bottom	NA	19	10	19-Oct	2017	18/12/2017	29	11	21	10	NA	190	30	0	182_2_7_19-Oct	0	0	0	0.545454545
182	2	7	top	NA	19	10	19-Oct	2017	18/12/2017	29	11	14	3	NA	191	30	1	182_2_7_19-Oct	7.142857143	9.090909091	0.090909091	0.818181818
182	3	1	bottom	NA	19	10	19-Oct	2017	18/12/2017	29	9	12	3	NA	192	30	0	182_3_1_19-Oct	0	0	0	0.444444444
182	3	1	top	NA	19	10	19-Oct	2017	18/12/2017	29	7	7	0	NA	193	30	0	182_3_1_19-Oct	0	0	0	1
182	3	3	bottom	NA	19	10	19-Oct	2017	18/12/2017	29	9	13	4	NA	194	30	1	182_3_3_19-Oct	7.692307692	11.11111111	0.111111111	0.888888889
182	3	3	top	NA	19	10	19-Oct	2017	18/12/2017	29	7	7	0	NA	195	30	0	182_3_3_19-Oct	0	0	0	0.428571429
182	3	4	bottom	NA	19	10	19-Oct	2017	18/12/2017	29	5	5	0	NA	196	30	0	182_3_4_19-Oct	0	0	0	0.6
182	3	4	top	NA	19	10	19-Oct	2017	18/12/2017	29	13	13	0	NA	197	30	0	182_3_4_19-Oct	0	0	0	0.846153846
182	3	5	bottom	NA	19	10	19-Oct	2017	18/12/2017	29	13	13	0	NA	198	30	0	182_3_5_19-Oct	0	0	0	0.384615385
182	3	5	top	NA	19	10	19-Oct	2017	18/12/2017	29	10	10	0	NA	199	30	0	182_3_5_19-Oct	0	0	0	1
182	3	6	bottom	NA	19	10	19-Oct	2017	18/12/2017	29	8	9	1	NA	200	30	0	182_3_6_19-Oct	0	0	0	0.25
182	3	6	top	NA	19	10	19-Oct	2017	18/12/2017	29	6	7	1	NA	201	30	0	182_3_6_19-Oct	0	0	0	0.5
182	3	7	bottom	NA	19	10	19-Oct	2017	18/12/2017	29	22	24	2	NA	202	30	0	182_3_7_19-Oct	0	0	0	0.409090909
182	3	7	top	NA	19	10	19-Oct	2017	18/12/2017	29	14	15	1	NA	203	30	0	182_3_7_19-Oct	0	0	0	0.714285714
53	1	1	bottom	NA	19	10	19-Oct	2017	18/12/2017	29	13	16	3	NA	100	30	0	53_1_1_19-Oct	0	0	0	1
53	1	1	top	NA	19	10	19-Oct	2017	18/12/2017	29	12	15	3	NA	101	30	0	53_1_1_19-Oct	0	0	0	1
53	2	1	bottom	NA	19	10	19-Oct	2017	18/12/2017	29	19	20	1	NA	102	30	0	53_2_1_19-Oct	0	0	0	1
53	2	1	top	NA	19	10	19-Oct	2017	18/12/2017	29	19	19	0	NA	103	30	0	53_2_1_19-Oct	0	0	0	1
53	3	1	bottom	NA	19	10	19-Oct	2017	18/12/2017	29	11	14	3	NA	104	30	1	53_3_1_19-Oct	7.142857143	9.090909091	0.090909091	0.818181818
53	3	1	top	NA	19	10	19-Oct	2017	18/12/2017	29	12	13	1	NA	105	30	0	53_3_1_19-Oct	0	0	0	0.75
53	4	1	bottom	NA	19	10	19-Oct	2017	18/12/2017	29	3	19	16	NA	106	30	0	53_4_1_19-Oct	0	0	0	1
53	4	1	top	NA	19	10	19-Oct	2017	18/12/2017	29	5	12	7	NA	107	30	0	53_4_1_19-Oct	0	0	0	1
53	5	1	bottom	NA	19	10	19-Oct	2017	18/12/2017	29	21	23	2	NA	108	30	0	53_5_1_19-Oct	0	0	0	1
53	5	1	top	NA	19	10	19-Oct	2017	18/12/2017	29	17	17	0	NA	109	30	0	53_5_1_19-Oct	0	0	0	1
53	6	1	bottom	NA	19	10	19-Oct	2017	18/12/2017	29	3	10	7	NA	110	30	0	53_6_1_19-Oct	0	0	0	1
53	6	1	top	NA	19	10	19-Oct	2017	18/12/2017	29	9	11	2	NA	111	30	0	53_6_1_19-Oct	0	0	0	1
53	7	1	bottom	NA	19	10	19-Oct	2017	18/12/2017	29	18	22	4	NA	112	30	0	53_7_1_19-Oct	0	0	0	1
53	7	1	top	NA	19	10	19-Oct	2017	18/12/2017	29	17	17	0	NA	113	30	0	53_7_1_19-Oct	0	0	0	1
53	8	1	bottom	NA	19	10	19-Oct	2017	18/12/2017	29	21	22	1	NA	114	30	0	53_8_1_19-Oct	0	0	0	1
53	8	1	top	NA	19	10	19-Oct	2017	18/12/2017	29	20	20	0	NA	115	30	0	53_8_1_19-Oct	0	0	0	1
53	9	1	bottom	NA	19	10	19-Oct	2017	18/12/2017	29	10	18	8	NA	116	30	0	53_9_1_19-Oct	0	0	0	1
53	9	1	top	NA	19	10	19-Oct	2017	18/12/2017	29	11	12	1	NA	117	30	0	53_9_1_19-Oct	0	0	0	1
53	10	1	bottom	NA	19	10	19-Oct	2017	18/12/2017	29	6	22	16	NA	118	30	0	53_10_1_19-Oct	0	0	0	1
53	10	1	top	NA	19	10	19-Oct	2017	18/12/2017	29	14	14	0	NA	119	30	0	53_10_1_19-Oct	0	0	0	0.928571429
182	1	1	bottom	NA	19	10	19-Oct	2017	18/12/2017	29	15	15	0	NA	160	31	0	182_1_1_19-Oct	0	0	0	0.933333333
182	1	1	top	NA	19	10	19-Oct	2017	18/12/2017	29	6	6	0	NA	161	31	0	182_1_1_19-Oct	0	0	0	1
182	1	10	bottom	NA	19	10	19-Oct	2017	18/12/2017	29	9	12	3	NA	176	31	0	182_1_10_19-Oct	0	0	0	0.888888889
182	1	10	top	NA	19	10	19-Oct	2017	18/12/2017	29	6	6	0	NA	177	31	0	182_1_10_19-Oct	0	0	0	0.833333333
182	1	2	bottom	NA	19	10	19-Oct	2017	18/12/2017	29	22	22	0	NA	178	31	0	182_1_2_19-Oct	0	0	0	0.863636364
182	1	2	top	NA	19	10	19-Oct	2017	18/12/2017	29	10	10	0	NA	179	31	0	182_1_2_19-Oct	0	0	0	1
182	1	3	bottom	NA	19	10	19-Oct	2017	18/12/2017	29	19	19	0	NA	162	31	0	182_1_3_19-Oct	0	0	0	0.789473684
182	1	3	top	NA	19	10	19-Oct	2017	18/12/2017	29	5	5	0	NA	163	31	1	182_1_3_19-Oct	20	20	0.2	0.8
182	1	4	bottom	NA	19	10	19-Oct	2017	18/12/2017	29	8	9	1	NA	164	31	0	182_1_4_19-Oct	0	0	0	0.875
182	1	4	top	NA	19	10	19-Oct	2017	18/12/2017	29	5	6	1	NA	165	31	0	182_1_4_19-Oct	0	0	0	1
182	1	5	bottom	NA	19	10	19-Oct	2017	18/12/2017	29	16	22	6	NA	166	31	0	182_1_5_19-Oct	0	0	0	0.6875
182	1	5	top	NA	19	10	19-Oct	2017	18/12/2017	29	12	15	3	NA	167	31	0	182_1_5_19-Oct	0	0	0	0.916666667
182	1	6	bottom	NA	19	10	19-Oct	2017	18/12/2017	29	15	15	0	NA	168	31	0	182_1_6_19-Oct	0	0	0	0.666666667
182	1	6	top	NA	19	10	19-Oct	2017	18/12/2017	29	10	12	2	NA	169	31	0	182_1_6_19-Oct	0	0	0	0.6
182	1	7	bottom	NA	19	10	19-Oct	2017	18/12/2017	29	20	20	0	NA	170	31	0	182_1_7_19-Oct	0	0	0	0.6
182	1	7	top	NA	19	10	19-Oct	2017	18/12/2017	29	17	17	0	NA	171	31	0	182_1_7_19-Oct	0	0	0	0.823529412
182	1	8	bottom	NA	19	10	19-Oct	2017	18/12/2017	29	12	12	0	NA	172	31	0	182_1_8_19-Oct	0	0	0	0.833333333
182	1	8	top	NA	19	10	19-Oct	2017	18/12/2017	29	9	9	0	NA	173	31	0	182_1_8_19-Oct	0	0	0	1
182	1	9	bottom	NA	19	10	19-Oct	2017	18/12/2017	29	14	14	0	NA	174	31	0	182_1_9_19-Oct	0	0	0	0.785714286
182	1	9	top	NA	19	10	19-Oct	2017	18/12/2017	29	17	17	0	NA	175	31	0	182_1_9_19-Oct	0	0	0	1
182	2	1	bottom	NA	19	10	19-Oct	2017	18/12/2017	29	16	16	0	NA	180	31	0	182_2_1_19-Oct	0	0	0	1
182	2	1	top	NA	19	10	19-Oct	2017	18/12/2017	29	13	13	0	NA	181	31	0	182_2_1_19-Oct	0	0	0	1
182	2	3	bottom	NA	19	10	19-Oct	2017	18/12/2017	29	9	9	0	NA	182	31	0	182_2_3_19-Oct	0	0	0	1
182	2	3	top	NA	19	10	19-Oct	2017	18/12/2017	29	10	10	0	NA	183	31	0	182_2_3_19-Oct	0	0	0	1
182	2	4	bottom	NA	19	10	19-Oct	2017	18/12/2017	29	13	14	1	NA	184	31	0	182_2_4_19-Oct	0	0	0	1
182	2	4	top	NA	19	10	19-Oct	2017	18/12/2017	29	14	14	0	NA	185	31	0	182_2_4_19-Oct	0	0	0	0.928571429
182	2	5	bottom	NA	19	10	19-Oct	2017	18/12/2017	29	18	18	0	NA	186	31	0	182_2_5_19-Oct	0	0	0	1
182	2	5	top	NA	19	10	19-Oct	2017	18/12/2017	29	12	13	1	NA	187	31	0	182_2_5_19-Oct	0	0	0	1
182	2	6	bottom	NA	19	10	19-Oct	2017	18/12/2017	29	11	20	9	NA	188	31	2	182_2_6_19-Oct	10	18.18181818	0.181818182	0.818181818
182	2	6	top	NA	19	10	19-Oct	2017	18/12/2017	29	16	18	2	NA	189	31	3	182_2_6_19-Oct	16.66666667	18.75	0.1875	0.75
182	2	7	bottom	NA	19	10	19-Oct	2017	18/12/2017	29	11	21	10	NA	190	31	1	182_2_7_19-Oct	4.761904762	9.090909091	0.090909091	0.636363636
182	2	7	top	NA	19	10	19-Oct	2017	18/12/2017	29	11	14	3	NA	191	31	1	182_2_7_19-Oct	7.142857143	9.090909091	0.090909091	0.909090909
182	3	1	bottom	NA	19	10	19-Oct	2017	18/12/2017	29	9	12	3	NA	192	31	1	182_3_1_19-Oct	8.333333333	11.11111111	0.111111111	0.555555556
182	3	1	top	NA	19	10	19-Oct	2017	18/12/2017	29	7	7	0	NA	193	31	0	182_3_1_19-Oct	0	0	0	1
182	3	3	bottom	NA	19	10	19-Oct	2017	18/12/2017	29	9	13	4	NA	194	31	0	182_3_3_19-Oct	0	0	0	0.888888889
182	3	3	top	NA	19	10	19-Oct	2017	18/12/2017	29	7	7	0	NA	195	31	1	182_3_3_19-Oct	14.28571429	14.28571429	0.142857143	0.571428571
182	3	4	bottom	NA	19	10	19-Oct	2017	18/12/2017	29	5	5	0	NA	196	31	0	182_3_4_19-Oct	0	0	0	0.6
182	3	4	top	NA	19	10	19-Oct	2017	18/12/2017	29	13	13	0	NA	197	31	1	182_3_4_19-Oct	7.692307692	7.692307692	0.076923077	0.923076923
182	3	5	bottom	NA	19	10	19-Oct	2017	18/12/2017	29	13	13	0	NA	198	31	0	182_3_5_19-Oct	0	0	0	0.384615385
182	3	5	top	NA	19	10	19-Oct	2017	18/12/2017	29	10	10	0	NA	199	31	0	182_3_5_19-Oct	0	0	0	1
182	3	6	bottom	NA	19	10	19-Oct	2017	18/12/2017	29	8	9	1	NA	200	31	0	182_3_6_19-Oct	0	0	0	0.25
182	3	6	top	NA	19	10	19-Oct	2017	18/12/2017	29	6	7	1	NA	201	31	0	182_3_6_19-Oct	0	0	0	0.5
182	3	7	bottom	NA	19	10	19-Oct	2017	18/12/2017	29	22	24	2	NA	202	31	2	182_3_7_19-Oct	8.333333333	9.090909091	0.090909091	0.5
182	3	7	top	NA	19	10	19-Oct	2017	18/12/2017	29	14	15	1	NA	203	31	0	182_3_7_19-Oct	0	0	0	0.714285714
53	1	1	bottom	NA	19	10	19-Oct	2017	18/12/2017	29	13	16	3	NA	100	31	0	53_1_1_19-Oct	0	0	0	1
53	1	1	top	NA	19	10	19-Oct	2017	18/12/2017	29	12	15	3	NA	101	31	0	53_1_1_19-Oct	0	0	0	1
53	2	1	bottom	NA	19	10	19-Oct	2017	18/12/2017	29	19	20	1	NA	102	31	0	53_2_1_19-Oct	0	0	0	1
53	2	1	top	NA	19	10	19-Oct	2017	18/12/2017	29	19	19	0	NA	103	31	0	53_2_1_19-Oct	0	0	0	1
53	3	1	bottom	NA	19	10	19-Oct	2017	18/12/2017	29	11	14	3	NA	104	31	0	53_3_1_19-Oct	0	0	0	0.818181818
53	3	1	top	NA	19	10	19-Oct	2017	18/12/2017	29	12	13	1	NA	105	31	0	53_3_1_19-Oct	0	0	0	0.75
53	4	1	bottom	NA	19	10	19-Oct	2017	18/12/2017	29	3	19	16	NA	106	31	0	53_4_1_19-Oct	0	0	0	1
53	4	1	top	NA	19	10	19-Oct	2017	18/12/2017	29	5	12	7	NA	107	31	0	53_4_1_19-Oct	0	0	0	1
53	5	1	bottom	NA	19	10	19-Oct	2017	18/12/2017	29	21	23	2	NA	108	31	0	53_5_1_19-Oct	0	0	0	1
53	5	1	top	NA	19	10	19-Oct	2017	18/12/2017	29	17	17	0	NA	109	31	0	53_5_1_19-Oct	0	0	0	1
53	6	1	bottom	NA	19	10	19-Oct	2017	18/12/2017	29	3	10	7	NA	110	31	0	53_6_1_19-Oct	0	0	0	1
53	6	1	top	NA	19	10	19-Oct	2017	18/12/2017	29	9	11	2	NA	111	31	0	53_6_1_19-Oct	0	0	0	1
53	7	1	bottom	NA	19	10	19-Oct	2017	18/12/2017	29	18	22	4	NA	112	31	0	53_7_1_19-Oct	0	0	0	1
53	7	1	top	NA	19	10	19-Oct	2017	18/12/2017	29	17	17	0	NA	113	31	0	53_7_1_19-Oct	0	0	0	1
53	8	1	bottom	NA	19	10	19-Oct	2017	18/12/2017	29	21	22	1	NA	114	31	0	53_8_1_19-Oct	0	0	0	1
53	8	1	top	NA	19	10	19-Oct	2017	18/12/2017	29	20	20	0	NA	115	31	0	53_8_1_19-Oct	0	0	0	1
53	9	1	bottom	NA	19	10	19-Oct	2017	18/12/2017	29	10	18	8	NA	116	31	0	53_9_1_19-Oct	0	0	0	1
53	9	1	top	NA	19	10	19-Oct	2017	18/12/2017	29	11	12	1	NA	117	31	0	53_9_1_19-Oct	0	0	0	1
53	10	1	bottom	NA	19	10	19-Oct	2017	18/12/2017	29	6	22	16	NA	118	31	0	53_10_1_19-Oct	0	0	0	1
53	10	1	top	NA	19	10	19-Oct	2017	18/12/2017	29	14	14	0	NA	119	31	0	53_10_1_19-Oct	0	0	0	0.928571429
182	1	1	bottom	NA	19	10	19-Oct	2017	18/12/2017	29	15	15	0	NA	160	32	0	182_1_1_19-Oct	0	0	0	0.933333333
182	1	1	top	NA	19	10	19-Oct	2017	18/12/2017	29	6	6	0	NA	161	32	0	182_1_1_19-Oct	0	0	0	1
182	1	10	bottom	NA	19	10	19-Oct	2017	18/12/2017	29	9	12	3	NA	176	32	0	182_1_10_19-Oct	0	0	0	0.888888889
182	1	10	top	NA	19	10	19-Oct	2017	18/12/2017	29	6	6	0	NA	177	32	0	182_1_10_19-Oct	0	0	0	0.833333333
182	1	2	bottom	NA	19	10	19-Oct	2017	18/12/2017	29	22	22	0	NA	178	32	1	182_1_2_19-Oct	4.545454545	4.545454545	0.045454545	0.909090909
182	1	2	top	NA	19	10	19-Oct	2017	18/12/2017	29	10	10	0	NA	179	32	0	182_1_2_19-Oct	0	0	0	1
182	1	3	bottom	NA	19	10	19-Oct	2017	18/12/2017	29	19	19	0	NA	162	32	0	182_1_3_19-Oct	0	0	0	0.789473684
182	1	3	top	NA	19	10	19-Oct	2017	18/12/2017	29	5	5	0	NA	163	32	0	182_1_3_19-Oct	0	0	0	0.8
182	1	4	bottom	NA	19	10	19-Oct	2017	18/12/2017	29	8	9	1	NA	164	32	0	182_1_4_19-Oct	0	0	0	0.875
182	1	4	top	NA	19	10	19-Oct	2017	18/12/2017	29	5	6	1	NA	165	32	0	182_1_4_19-Oct	0	0	0	1
182	1	5	bottom	NA	19	10	19-Oct	2017	18/12/2017	29	16	22	6	NA	166	32	1	182_1_5_19-Oct	4.545454545	6.25	0.0625	0.75
182	1	5	top	NA	19	10	19-Oct	2017	18/12/2017	29	12	15	3	NA	167	32	0	182_1_5_19-Oct	0	0	0	0.916666667
182	1	6	bottom	NA	19	10	19-Oct	2017	18/12/2017	29	15	15	0	NA	168	32	1	182_1_6_19-Oct	6.666666667	6.666666667	0.066666667	0.733333333
182	1	6	top	NA	19	10	19-Oct	2017	18/12/2017	29	10	12	2	NA	169	32	0	182_1_6_19-Oct	0	0	0	0.6
182	1	7	bottom	NA	19	10	19-Oct	2017	18/12/2017	29	20	20	0	NA	170	32	1	182_1_7_19-Oct	5	5	0.05	0.65
[truncated: 3,377 more rows]
