# Supplementary material for: An ABA-GA bistable switch can account for natural variation in the variability of Arabidopsis seed germination time
Source: eLife. 2021 Jun 1;10:e59485. doi: 10.7554/eLife.59485 (PMC8169117; doi:10.7554/eLife.59485)
Supplement: Figure 2—source data 1. [file elife-59485-fig2-data1.tds]

Magic_line	Plant	Sowing.day	Sowing.month	Sowing_date	Year	Scoring.date	Mother.plant.sowing.number	DAR	MeanDAR	Total.germinated	Total	NonGer	id	RepNumber	day	number	name	perc	perc_total_ger	group
M178	1	20	4	20-Apr	2016		6	34	34	118	153	35	479	7	1	0	M178_20-Apr_1	0	0	magic
M178	1	20	4	20-Apr	2016		6	34	34	118	153	35	479	7	2	2	M178_20-Apr_1	1.307189542	1.694915254	magic
M178	1	20	4	20-Apr	2016		6	34	34	118	153	35	479	7	3	10	M178_20-Apr_1	6.535947712	8.474576271	magic
M178	1	20	4	20-Apr	2016		6	34	34	118	153	35	479	7	4	7	M178_20-Apr_1	4.575163399	5.93220339	magic
M178	1	20	4	20-Apr	2016		6	34	34	118	153	35	479	7	5	5	M178_20-Apr_1	3.267973856	4.237288136	magic
M178	1	20	4	20-Apr	2016		6	34	34	118	153	35	479	7	6	19	M178_20-Apr_1	12.41830065	16.10169492	magic
M178	1	20	4	20-Apr	2016		6	34	34	118	153	35	479	7	7	12	M178_20-Apr_1	7.843137255	10.16949153	magic
M178	1	20	4	20-Apr	2016		6	34	34	118	153	35	479	7	8	7	M178_20-Apr_1	4.575163399	5.93220339	magic
M178	1	20	4	20-Apr	2016		6	34	34	118	153	35	479	7	9	6	M178_20-Apr_1	3.921568627	5.084745763	magic
M178	1	20	4	20-Apr	2016		6	34	34	118	153	35	479	7	10	2	M178_20-Apr_1	1.307189542	1.694915254	magic
M178	1	20	4	20-Apr	2016		6	34	34	118	153	35	479	7	11	1	M178_20-Apr_1	0.653594771	0.847457627	magic
M178	1	20	4	20-Apr	2016		6	34	34	118	153	35	479	7	12	2	M178_20-Apr_1	1.307189542	1.694915254	magic
M178	1	20	4	20-Apr	2016		6	34	34	118	153	35	479	7	13	0	M178_20-Apr_1	0	0	magic
M178	1	20	4	20-Apr	2016		6	34	34	118	153	35	479	7	14	0	M178_20-Apr_1	0	0	magic
M178	1	20	4	20-Apr	2016		6	34	34	118	153	35	479	7	15	0	M178_20-Apr_1	0	0	magic
M178	1	20	4	20-Apr	2016		6	34	34	118	153	35	479	7	16	0	M178_20-Apr_1	0	0	magic
M178	1	20	4	20-Apr	2016		6	34	34	118	153	35	479	7	17	0	M178_20-Apr_1	0	0	magic
M178	1	20	4	20-Apr	2016		6	34	34	118	153	35	479	7	18	0	M178_20-Apr_1	0	0	magic
M178	1	20	4	20-Apr	2016		6	34	34	118	153	35	479	7	19	0	M178_20-Apr_1	0	0	magic
M178	1	20	4	20-Apr	2016		6	34	34	118	153	35	479	7	20	0	M178_20-Apr_1	0	0	magic
M178	1	20	4	20-Apr	2016		6	34	34	118	153	35	479	7	21	1	M178_20-Apr_1	0.653594771	0.847457627	magic
M178	1	20	4	20-Apr	2016		6	34	34	118	153	35	479	7	22	0	M178_20-Apr_1	0	0	magic
M178	1	20	4	20-Apr	2016		6	34	34	118	153	35	479	7	23	1	M178_20-Apr_1	0.653594771	0.847457627	magic
M178	1	20	4	20-Apr	2016		6	34	34	118	153	35	479	7	24	0	M178_20-Apr_1	0	0	magic
M178	1	20	4	20-Apr	2016		6	34	34	118	153	35	479	7	25	0	M178_20-Apr_1	0	0	magic
M178	1	20	4	20-Apr	2016		6	34	34	118	153	35	479	7	26	0	M178_20-Apr_1	0	0	magic
M178	1	20	4	20-Apr	2016		6	34	34	118	153	35	479	7	27	0	M178_20-Apr_1	0	0	magic
M178	1	20	4	20-Apr	2016		6	34	34	118	153	35	479	7	28	0	M178_20-Apr_1	0	0	magic
M178	1	20	4	20-Apr	2016		6	34	34	118	153	35	479	7	29	1	M178_20-Apr_1	0.653594771	0.847457627	magic
M178	1	20	4	20-Apr	2016		6	34	34	118	153	35	479	7	30	0	M178_20-Apr_1	0	0	magic
M178	1	20	4	20-Apr	2016		6	34	34	118	153	35	479	7	31	2	M178_20-Apr_1	1.307189542	1.694915254	magic
M178	1	20	4	20-Apr	2016		6	34	34	118	153	35	479	7	32	1	M178_20-Apr_1	0.653594771	0.847457627	magic
M178	1	20	4	20-Apr	2016		6	34	34	118	153	35	479	7	33	2	M178_20-Apr_1	1.307189542	1.694915254	magic
M178	1	20	4	20-Apr	2016		6	34	34	118	153	35	479	7	34	0	M178_20-Apr_1	0	0	magic
M178	1	20	4	20-Apr	2016		6	34	34	118	153	35	479	7	35	2	M178_20-Apr_1	1.307189542	1.694915254	magic
M178	1	20	4	20-Apr	2016		6	34	34	118	153	35	479	7	36	4	M178_20-Apr_1	2.614379085	3.389830508	magic
M178	1	20	4	20-Apr	2016		6	34	34	118	153	35	479	7	37	3	M178_20-Apr_1	1.960784314	2.542372881	magic
M178	1	20	4	20-Apr	2016		6	34	34	118	153	35	479	7	38	6	M178_20-Apr_1	3.921568627	5.084745763	magic
M178	1	20	4	20-Apr	2016		6	34	34	118	153	35	479	7	39	4	M178_20-Apr_1	2.614379085	3.389830508	magic
M178	1	20	4	20-Apr	2016		6	34	34	118	153	35	479	7	40	3	M178_20-Apr_1	1.960784314	2.542372881	magic
M178	1	20	4	20-Apr	2016		6	34	34	118	153	35	479	7	41	3	M178_20-Apr_1	1.960784314	2.542372881	magic
M178	1	20	4	20-Apr	2016		6	34	34	118	153	35	479	7	42	5	M178_20-Apr_1	3.267973856	4.237288136	magic
M178	1	20	4	20-Apr	2016		6	34	34	118	153	35	479	7	43	0	M178_20-Apr_1	0	0	magic
M178	1	20	4	20-Apr	2016		6	34	34	118	153	35	479	7	44	4	M178_20-Apr_1	2.614379085	3.389830508	magic
M178	1	20	4	20-Apr	2016		6	34	34	118	153	35	479	7	45	1	M178_20-Apr_1	0.653594771	0.847457627	magic
M178	1	20	4	20-Apr	2016		6	34	34	118	153	35	479	7	46	1	M178_20-Apr_1	0.653594771	0.847457627	magic
M178	1	20	4	20-Apr	2016		6	34	34	118	153	35	479	7	47	0	M178_20-Apr_1	0	0	magic
M178	1	20	4	20-Apr	2016		6	34	34	118	153	35	479	7	48	1	M178_20-Apr_1	0.653594771	0.847457627	magic
M178	1	20	4	20-Apr	2016		6	34	34	118	153	35	479	7	49	0	M178_20-Apr_1	0	0	magic
M178	1	20	4	20-Apr	2016		6	34	34	118	153	35	479	7	50	0	M178_20-Apr_1	0	0	magic
M178	1	20	4	20-Apr	2016		6	34	34	118	153	35	479	7	51	0	M178_20-Apr_1	0	0	magic
M178	1b	25	11	25-Nov	2016	31/01/2017	13	25	25	79	104	25	485	3	1	0	M178_25-Nov_1b	0	0	magic
M178	1b	25	11	25-Nov	2016	31/01/2017	13	25	25	79	104	25	485	3	2	0	M178_25-Nov_1b	0	0	magic
M178	1b	25	11	25-Nov	2016	31/01/2017	13	25	25	79	104	25	485	3	3	14	M178_25-Nov_1b	13.46153846	17.72151899	magic
M178	1b	25	11	25-Nov	2016	31/01/2017	13	25	25	79	104	25	485	3	4	19	M178_25-Nov_1b	18.26923077	24.05063291	magic
M178	1b	25	11	25-Nov	2016	31/01/2017	13	25	25	79	104	25	485	3	5	19	M178_25-Nov_1b	18.26923077	24.05063291	magic
M178	1b	25	11	25-Nov	2016	31/01/2017	13	25	25	79	104	25	485	3	6	6	M178_25-Nov_1b	5.769230769	7.594936709	magic
M178	1b	25	11	25-Nov	2016	31/01/2017	13	25	25	79	104	25	485	3	7	1	M178_25-Nov_1b	0.961538462	1.265822785	magic
M178	1b	25	11	25-Nov	2016	31/01/2017	13	25	25	79	104	25	485	3	8	0	M178_25-Nov_1b	0	0	magic
M178	1b	25	11	25-Nov	2016	31/01/2017	13	25	25	79	104	25	485	3	9	4	M178_25-Nov_1b	3.846153846	5.063291139	magic
M178	1b	25	11	25-Nov	2016	31/01/2017	13	25	25	79	104	25	485	3	10	1	M178_25-Nov_1b	0.961538462	1.265822785	magic
M178	1b	25	11	25-Nov	2016	31/01/2017	13	25	25	79	104	25	485	3	11	0	M178_25-Nov_1b	0	0	magic
M178	1b	25	11	25-Nov	2016	31/01/2017	13	25	25	79	104	25	485	3	12	0	M178_25-Nov_1b	0	0	magic
M178	1b	25	11	25-Nov	2016	31/01/2017	13	25	25	79	104	25	485	3	13	1	M178_25-Nov_1b	0.961538462	1.265822785	magic
M178	1b	25	11	25-Nov	2016	31/01/2017	13	25	25	79	104	25	485	3	14	0	M178_25-Nov_1b	0	0	magic
M178	1b	25	11	25-Nov	2016	31/01/2017	13	25	25	79	104	25	485	3	15	0	M178_25-Nov_1b	0	0	magic
M178	1b	25	11	25-Nov	2016	31/01/2017	13	25	25	79	104	25	485	3	16	0	M178_25-Nov_1b	0	0	magic
M178	1b	25	11	25-Nov	2016	31/01/2017	13	25	25	79	104	25	485	3	17	0	M178_25-Nov_1b	0	0	magic
M178	1b	25	11	25-Nov	2016	31/01/2017	13	25	25	79	104	25	485	3	18	0	M178_25-Nov_1b	0	0	magic
M178	1b	25	11	25-Nov	2016	31/01/2017	13	25	25	79	104	25	485	3	19	0	M178_25-Nov_1b	0	0	magic
M178	1b	25	11	25-Nov	2016	31/01/2017	13	25	25	79	104	25	485	3	20	0	M178_25-Nov_1b	0	0	magic
M178	1b	25	11	25-Nov	2016	31/01/2017	13	25	25	79	104	25	485	3	21	0	M178_25-Nov_1b	0	0	magic
M178	1b	25	11	25-Nov	2016	31/01/2017	13	25	25	79	104	25	485	3	22	0	M178_25-Nov_1b	0	0	magic
M178	1b	25	11	25-Nov	2016	31/01/2017	13	25	25	79	104	25	485	3	23	0	M178_25-Nov_1b	0	0	magic
M178	1b	25	11	25-Nov	2016	31/01/2017	13	25	25	79	104	25	485	3	24	0	M178_25-Nov_1b	0	0	magic
M178	1b	25	11	25-Nov	2016	31/01/2017	13	25	25	79	104	25	485	3	25	0	M178_25-Nov_1b	0	0	magic
M178	1b	25	11	25-Nov	2016	31/01/2017	13	25	25	79	104	25	485	3	26	1	M178_25-Nov_1b	0.961538462	1.265822785	magic
M178	1b	25	11	25-Nov	2016	31/01/2017	13	25	25	79	104	25	485	3	27	0	M178_25-Nov_1b	0	0	magic
M178	1b	25	11	25-Nov	2016	31/01/2017	13	25	25	79	104	25	485	3	28	0	M178_25-Nov_1b	0	0	magic
M178	1b	25	11	25-Nov	2016	31/01/2017	13	25	25	79	104	25	485	3	29	0	M178_25-Nov_1b	0	0	magic
M178	1b	25	11	25-Nov	2016	31/01/2017	13	25	25	79	104	25	485	3	30	0	M178_25-Nov_1b	0	0	magic
M178	1b	25	11	25-Nov	2016	31/01/2017	13	25	25	79	104	25	485	3	31	0	M178_25-Nov_1b	0	0	magic
M178	1b	25	11	25-Nov	2016	31/01/2017	13	25	25	79	104	25	485	3	32	0	M178_25-Nov_1b	0	0	magic
M178	1b	25	11	25-Nov	2016	31/01/2017	13	25	25	79	104	25	485	3	33	0	M178_25-Nov_1b	0	0	magic
M178	1b	25	11	25-Nov	2016	31/01/2017	13	25	25	79	104	25	485	3	34	0	M178_25-Nov_1b	0	0	magic
M178	1b	25	11	25-Nov	2016	31/01/2017	13	25	25	79	104	25	485	3	35	0	M178_25-Nov_1b	0	0	magic
M178	1b	25	11	25-Nov	2016	31/01/2017	13	25	25	79	104	25	485	3	36	0	M178_25-Nov_1b	0	0	magic
M178	1b	25	11	25-Nov	2016	31/01/2017	13	25	25	79	104	25	485	3	37	0	M178_25-Nov_1b	0	0	magic
M178	1b	25	11	25-Nov	2016	31/01/2017	13	25	25	79	104	25	485	3	38	0	M178_25-Nov_1b	0	0	magic
M178	1b	25	11	25-Nov	2016	31/01/2017	13	25	25	79	104	25	485	3	39	3	M178_25-Nov_1b	2.884615385	3.797468354	magic
M178	1b	25	11	25-Nov	2016	31/01/2017	13	25	25	79	104	25	485	3	40	0	M178_25-Nov_1b	0	0	magic
M178	1b	25	11	25-Nov	2016	31/01/2017	13	25	25	79	104	25	485	3	41	3	M178_25-Nov_1b	2.884615385	3.797468354	magic
M178	1b	25	11	25-Nov	2016	31/01/2017	13	25	25	79	104	25	485	3	42	0	M178_25-Nov_1b	0	0	magic
M178	1b	25	11	25-Nov	2016	31/01/2017	13	25	25	79	104	25	485	3	43	1	M178_25-Nov_1b	0.961538462	1.265822785	magic
M178	1b	25	11	25-Nov	2016	31/01/2017	13	25	25	79	104	25	485	3	44	1	M178_25-Nov_1b	0.961538462	1.265822785	magic
M178	1b	25	11	25-Nov	2016	31/01/2017	13	25	25	79	104	25	485	3	45	1	M178_25-Nov_1b	0.961538462	1.265822785	magic
M178	1b	25	11	25-Nov	2016	31/01/2017	13	25	25	79	104	25	485	3	46	0	M178_25-Nov_1b	0	0	magic
M178	1b	25	11	25-Nov	2016	31/01/2017	13	25	25	79	104	25	485	3	47	2	M178_25-Nov_1b	1.923076923	2.53164557	magic
M178	1b	25	11	25-Nov	2016	31/01/2017	13	25	25	79	104	25	485	3	48	0	M178_25-Nov_1b	0	0	magic
M178	1b	25	11	25-Nov	2016	31/01/2017	13	25	25	79	104	25	485	3	49	0	M178_25-Nov_1b	0	0	magic
M178	1b	25	11	25-Nov	2016	31/01/2017	13	25	25	79	104	25	485	3	50	0	M178_25-Nov_1b	0	0	magic
M178	1b	25	11	25-Nov	2016	31/01/2017	13	25	25	79	104	25	485	3	51	0	M178_25-Nov_1b	0	0	magic
M178	1b	25	11	25-Nov	2016	31/01/2017	13	25	25	79	104	25	485	3	52	0	M178_25-Nov_1b	0	0	magic
M178	1b	25	11	25-Nov	2016	31/01/2017	13	25	25	79	104	25	485	3	53	0	M178_25-Nov_1b	0	0	magic
M178	1b	25	11	25-Nov	2016	31/01/2017	13	25	25	79	104	25	485	3	54	0	M178_25-Nov_1b	0	0	magic
M178	1b	25	11	25-Nov	2016	31/01/2017	13	25	25	79	104	25	485	3	55	0	M178_25-Nov_1b	0	0	magic
M178	1b	25	11	25-Nov	2016	31/01/2017	13	25	25	79	104	25	485	3	56	0	M178_25-Nov_1b	0	0	magic
M178	1b	25	11	25-Nov	2016	31/01/2017	13	25	25	79	104	25	485	3	57	0	M178_25-Nov_1b	0	0	magic
M178	1b	25	11	25-Nov	2016	31/01/2017	13	25	25	79	104	25	485	3	58	0	M178_25-Nov_1b	0	0	magic
M178	1b	25	11	25-Nov	2016	31/01/2017	13	25	25	79	104	25	485	3	59	0	M178_25-Nov_1b	0	0	magic
M178	1b	25	11	25-Nov	2016	31/01/2017	13	25	25	79	104	25	485	3	60	1	M178_25-Nov_1b	0.961538462	1.265822785	magic
M178	1b	25	11	25-Nov	2016	31/01/2017	13	25	25	79	104	25	485	3	61	1	M178_25-Nov_1b	0.961538462	1.265822785	magic
M178	2	20	4	20-Apr	2016		6	34	34	163	173	10	478	6	1	0	M178_20-Apr_2	0	0	magic
M178	2	20	4	20-Apr	2016		6	34	34	163	173	10	478	6	2	7	M178_20-Apr_2	4.046242775	4.294478528	magic
M178	2	20	4	20-Apr	2016		6	34	34	163	173	10	478	6	3	12	M178_20-Apr_2	6.936416185	7.36196319	magic
M178	2	20	4	20-Apr	2016		6	34	34	163	173	10	478	6	4	15	M178_20-Apr_2	8.670520231	9.202453988	magic
M178	2	20	4	20-Apr	2016		6	34	34	163	173	10	478	6	5	15	M178_20-Apr_2	8.670520231	9.202453988	magic
M178	2	20	4	20-Apr	2016		6	34	34	163	173	10	478	6	6	26	M178_20-Apr_2	15.02890173	15.95092025	magic
M178	2	20	4	20-Apr	2016		6	34	34	163	173	10	478	6	7	26	M178_20-Apr_2	15.02890173	15.95092025	magic
M178	2	20	4	20-Apr	2016		6	34	34	163	173	10	478	6	8	21	M178_20-Apr_2	12.13872832	12.88343558	magic
M178	2	20	4	20-Apr	2016		6	34	34	163	173	10	478	6	9	7	M178_20-Apr_2	4.046242775	4.294478528	magic
M178	2	20	4	20-Apr	2016		6	34	34	163	173	10	478	6	10	8	M178_20-Apr_2	4.624277457	4.90797546	magic
M178	2	20	4	20-Apr	2016		6	34	34	163	173	10	478	6	11	0	M178_20-Apr_2	0	0	magic
M178	2	20	4	20-Apr	2016		6	34	34	163	173	10	478	6	12	0	M178_20-Apr_2	0	0	magic
M178	2	20	4	20-Apr	2016		6	34	34	163	173	10	478	6	13	0	M178_20-Apr_2	0	0	magic
M178	2	20	4	20-Apr	2016		6	34	34	163	173	10	478	6	14	0	M178_20-Apr_2	0	0	magic
M178	2	20	4	20-Apr	2016		6	34	34	163	173	10	478	6	15	0	M178_20-Apr_2	0	0	magic
M178	2	20	4	20-Apr	2016		6	34	34	163	173	10	478	6	16	0	M178_20-Apr_2	0	0	magic
M178	2	20	4	20-Apr	2016		6	34	34	163	173	10	478	6	17	0	M178_20-Apr_2	0	0	magic
M178	2	20	4	20-Apr	2016		6	34	34	163	173	10	478	6	18	0	M178_20-Apr_2	0	0	magic
M178	2	20	4	20-Apr	2016		6	34	34	163	173	10	478	6	19	0	M178_20-Apr_2	0	0	magic
M178	2	20	4	20-Apr	2016		6	34	34	163	173	10	478	6	20	0	M178_20-Apr_2	0	0	magic
M178	2	20	4	20-Apr	2016		6	34	34	163	173	10	478	6	21	0	M178_20-Apr_2	0	0	magic
M178	2	20	4	20-Apr	2016		6	34	34	163	173	10	478	6	22	1	M178_20-Apr_2	0.578034682	0.613496933	magic
M178	2	20	4	20-Apr	2016		6	34	34	163	173	10	478	6	23	0	M178_20-Apr_2	0	0	magic
M178	2	20	4	20-Apr	2016		6	34	34	163	173	10	478	6	24	0	M178_20-Apr_2	0	0	magic
M178	2	20	4	20-Apr	2016		6	34	34	163	173	10	478	6	25	0	M178_20-Apr_2	0	0	magic
M178	2	20	4	20-Apr	2016		6	34	34	163	173	10	478	6	26	0	M178_20-Apr_2	0	0	magic
M178	2	20	4	20-Apr	2016		6	34	34	163	173	10	478	6	27	0	M178_20-Apr_2	0	0	magic
M178	2	20	4	20-Apr	2016		6	34	34	163	173	10	478	6	28	0	M178_20-Apr_2	0	0	magic
M178	2	20	4	20-Apr	2016		6	34	34	163	173	10	478	6	29	0	M178_20-Apr_2	0	0	magic
M178	2	20	4	20-Apr	2016		6	34	34	163	173	10	478	6	30	0	M178_20-Apr_2	0	0	magic
M178	2	20	4	20-Apr	2016		6	34	34	163	173	10	478	6	31	0	M178_20-Apr_2	0	0	magic
M178	2	20	4	20-Apr	2016		6	34	34	163	173	10	478	6	32	0	M178_20-Apr_2	0	0	magic
M178	2	20	4	20-Apr	2016		6	34	34	163	173	10	478	6	33	0	M178_20-Apr_2	0	0	magic
M178	2	20	4	20-Apr	2016		6	34	34	163	173	10	478	6	34	0	M178_20-Apr_2	0	0	magic
M178	2	20	4	20-Apr	2016		6	34	34	163	173	10	478	6	35	0	M178_20-Apr_2	0	0	magic
M178	2	20	4	20-Apr	2016		6	34	34	163	173	10	478	6	36	0	M178_20-Apr_2	0	0	magic
M178	2	20	4	20-Apr	2016		6	34	34	163	173	10	478	6	37	0	M178_20-Apr_2	0	0	magic
M178	2	20	4	20-Apr	2016		6	34	34	163	173	10	478	6	38	0	M178_20-Apr_2	0	0	magic
M178	2	20	4	20-Apr	2016		6	34	34	163	173	10	478	6	39	0	M178_20-Apr_2	0	0	magic
M178	2	20	4	20-Apr	2016		6	34	34	163	173	10	478	6	40	0	M178_20-Apr_2	0	0	magic
M178	2	20	4	20-Apr	2016		6	34	34	163	173	10	478	6	41	0	M178_20-Apr_2	0	0	magic
M178	2	20	4	20-Apr	2016		6	34	34	163	173	10	478	6	42	0	M178_20-Apr_2	0	0	magic
M178	2	20	4	20-Apr	2016		6	34	34	163	173	10	478	6	43	0	M178_20-Apr_2	0	0	magic
M178	2	20	4	20-Apr	2016		6	34	34	163	173	10	478	6	44	0	M178_20-Apr_2	0	0	magic
M178	2	20	4	20-Apr	2016		6	34	34	163	173	10	478	6	45	10	M178_20-Apr_2	5.780346821	6.134969325	magic
M178	2	20	4	20-Apr	2016		6	34	34	163	173	10	478	6	46	5	M178_20-Apr_2	2.89017341	3.067484663	magic
M178	2	20	4	20-Apr	2016		6	34	34	163	173	10	478	6	47	0	M178_20-Apr_2	0	0	magic
M178	2	20	4	20-Apr	2016		6	34	34	163	173	10	478	6	48	4	M178_20-Apr_2	2.312138728	2.45398773	magic
M178	2	20	4	20-Apr	2016		6	34	34	163	173	10	478	6	49	1	M178_20-Apr_2	0.578034682	0.613496933	magic
M178	2	20	4	20-Apr	2016		6	34	34	163	173	10	478	6	50	5	M178_20-Apr_2	2.89017341	3.067484663	magic
M178	2	20	4	20-Apr	2016		6	34	34	163	173	10	478	6	51	0	M178_20-Apr_2	0	0	magic
M178	2B	25	11	25-Nov	2016	31/01/2017	13	25	25	106	110	4	483	1	1	0	M178_25-Nov_2B	0	0	magic
M178	2B	25	11	25-Nov	2016	31/01/2017	13	25	25	106	110	4	483	1	2	0	M178_25-Nov_2B	0	0	magic
M178	2B	25	11	25-Nov	2016	31/01/2017	13	25	25	106	110	4	483	1	3	18	M178_25-Nov_2B	16.36363636	16.98113208	magic
M178	2B	25	11	25-Nov	2016	31/01/2017	13	25	25	106	110	4	483	1	4	28	M178_25-Nov_2B	25.45454545	26.41509434	magic
M178	2B	25	11	25-Nov	2016	31/01/2017	13	25	25	106	110	4	483	1	5	26	M178_25-Nov_2B	23.63636364	24.52830189	magic
M178	2B	25	11	25-Nov	2016	31/01/2017	13	25	25	106	110	4	483	1	6	5	M178_25-Nov_2B	4.545454545	4.716981132	magic
M178	2B	25	11	25-Nov	2016	31/01/2017	13	25	25	106	110	4	483	1	7	5	M178_25-Nov_2B	4.545454545	4.716981132	magic
M178	2B	25	11	25-Nov	2016	31/01/2017	13	25	25	106	110	4	483	1	8	1	M178_25-Nov_2B	0.909090909	0.943396226	magic
M178	2B	25	11	25-Nov	2016	31/01/2017	13	25	25	106	110	4	483	1	9	0	M178_25-Nov_2B	0	0	magic
M178	2B	25	11	25-Nov	2016	31/01/2017	13	25	25	106	110	4	483	1	10	1	M178_25-Nov_2B	0.909090909	0.943396226	magic
M178	2B	25	11	25-Nov	2016	31/01/2017	13	25	25	106	110	4	483	1	11	4	M178_25-Nov_2B	3.636363636	3.773584906	magic
M178	2B	25	11	25-Nov	2016	31/01/2017	13	25	25	106	110	4	483	1	12	4	M178_25-Nov_2B	3.636363636	3.773584906	magic
M178	2B	25	11	25-Nov	2016	31/01/2017	13	25	25	106	110	4	483	1	13	0	M178_25-Nov_2B	0	0	magic
M178	2B	25	11	25-Nov	2016	31/01/2017	13	25	25	106	110	4	483	1	14	2	M178_25-Nov_2B	1.818181818	1.886792453	magic
M178	2B	25	11	25-Nov	2016	31/01/2017	13	25	25	106	110	4	483	1	15	0	M178_25-Nov_2B	0	0	magic
M178	2B	25	11	25-Nov	2016	31/01/2017	13	25	25	106	110	4	483	1	16	0	M178_25-Nov_2B	0	0	magic
M178	2B	25	11	25-Nov	2016	31/01/2017	13	25	25	106	110	4	483	1	17	0	M178_25-Nov_2B	0	0	magic
M178	2B	25	11	25-Nov	2016	31/01/2017	13	25	25	106	110	4	483	1	18	0	M178_25-Nov_2B	0	0	magic
M178	2B	25	11	25-Nov	2016	31/01/2017	13	25	25	106	110	4	483	1	19	1	M178_25-Nov_2B	0.909090909	0.943396226	magic
M178	2B	25	11	25-Nov	2016	31/01/2017	13	25	25	106	110	4	483	1	20	0	M178_25-Nov_2B	0	0	magic
M178	2B	25	11	25-Nov	2016	31/01/2017	13	25	25	106	110	4	483	1	21	0	M178_25-Nov_2B	0	0	magic
M178	2B	25	11	25-Nov	2016	31/01/2017	13	25	25	106	110	4	483	1	22	0	M178_25-Nov_2B	0	0	magic
M178	2B	25	11	25-Nov	2016	31/01/2017	13	25	25	106	110	4	483	1	23	0	M178_25-Nov_2B	0	0	magic
M178	2B	25	11	25-Nov	2016	31/01/2017	13	25	25	106	110	4	483	1	24	0	M178_25-Nov_2B	0	0	magic
M178	2B	25	11	25-Nov	2016	31/01/2017	13	25	25	106	110	4	483	1	25	1	M178_25-Nov_2B	0.909090909	0.943396226	magic
M178	2B	25	11	25-Nov	2016	31/01/2017	13	25	25	106	110	4	483	1	26	0	M178_25-Nov_2B	0	0	magic
M178	2B	25	11	25-Nov	2016	31/01/2017	13	25	25	106	110	4	483	1	27	0	M178_25-Nov_2B	0	0	magic
M178	2B	25	11	25-Nov	2016	31/01/2017	13	25	25	106	110	4	483	1	28	0	M178_25-Nov_2B	0	0	magic
M178	2B	25	11	25-Nov	2016	31/01/2017	13	25	25	106	110	4	483	1	29	0	M178_25-Nov_2B	0	0	magic
M178	2B	25	11	25-Nov	2016	31/01/2017	13	25	25	106	110	4	483	1	30	0	M178_25-Nov_2B	0	0	magic
M178	2B	25	11	25-Nov	2016	31/01/2017	13	25	25	106	110	4	483	1	31	0	M178_25-Nov_2B	0	0	magic
M178	2B	25	11	25-Nov	2016	31/01/2017	13	25	25	106	110	4	483	1	32	0	M178_25-Nov_2B	0	0	magic
M178	2B	25	11	25-Nov	2016	31/01/2017	13	25	25	106	110	4	483	1	33	0	M178_25-Nov_2B	0	0	magic
M178	2B	25	11	25-Nov	2016	31/01/2017	13	25	25	106	110	4	483	1	34	0	M178_25-Nov_2B	0	0	magic
M178	2B	25	11	25-Nov	2016	31/01/2017	13	25	25	106	110	4	483	1	35	0	M178_25-Nov_2B	0	0	magic
M178	2B	25	11	25-Nov	2016	31/01/2017	13	25	25	106	110	4	483	1	36	0	M178_25-Nov_2B	0	0	magic
M178	2B	25	11	25-Nov	2016	31/01/2017	13	25	25	106	110	4	483	1	37	0	M178_25-Nov_2B	0	0	magic
M178	2B	25	11	25-Nov	2016	31/01/2017	13	25	25	106	110	4	483	1	38	0	M178_25-Nov_2B	0	0	magic
M178	2B	25	11	25-Nov	2016	31/01/2017	13	25	25	106	110	4	483	1	39	2	M178_25-Nov_2B	1.818181818	1.886792453	magic
M178	2B	25	11	25-Nov	2016	31/01/2017	13	25	25	106	110	4	483	1	40	0	M178_25-Nov_2B	0	0	magic
M178	2B	25	11	25-Nov	2016	31/01/2017	13	25	25	106	110	4	483	1	41	0	M178_25-Nov_2B	0	0	magic
M178	2B	25	11	25-Nov	2016	31/01/2017	13	25	25	106	110	4	483	1	42	0	M178_25-Nov_2B	0	0	magic
M178	2B	25	11	25-Nov	2016	31/01/2017	13	25	25	106	110	4	483	1	43	0	M178_25-Nov_2B	0	0	magic
M178	2B	25	11	25-Nov	2016	31/01/2017	13	25	25	106	110	4	483	1	44	1	M178_25-Nov_2B	0.909090909	0.943396226	magic
M178	2B	25	11	25-Nov	2016	31/01/2017	13	25	25	106	110	4	483	1	45	1	M178_25-Nov_2B	0.909090909	0.943396226	magic
M178	2B	25	11	25-Nov	2016	31/01/2017	13	25	25	106	110	4	483	1	46	2	M178_25-Nov_2B	1.818181818	1.886792453	magic
M178	2B	25	11	25-Nov	2016	31/01/2017	13	25	25	106	110	4	483	1	47	0	M178_25-Nov_2B	0	0	magic
M178	2B	25	11	25-Nov	2016	31/01/2017	13	25	25	106	110	4	483	1	48	0	M178_25-Nov_2B	0	0	magic
M178	2B	25	11	25-Nov	2016	31/01/2017	13	25	25	106	110	4	483	1	49	0	M178_25-Nov_2B	0	0	magic
M178	2B	25	11	25-Nov	2016	31/01/2017	13	25	25	106	110	4	483	1	50	1	M178_25-Nov_2B	0.909090909	0.943396226	magic
M178	2B	25	11	25-Nov	2016	31/01/2017	13	25	25	106	110	4	483	1	51	1	M178_25-Nov_2B	0.909090909	0.943396226	magic
M178	2B	25	11	25-Nov	2016	31/01/2017	13	25	25	106	110	4	483	1	52	0	M178_25-Nov_2B	0	0	magic
M178	2B	25	11	25-Nov	2016	31/01/2017	13	25	25	106	110	4	483	1	53	2	M178_25-Nov_2B	1.818181818	1.886792453	magic
M178	2B	25	11	25-Nov	2016	31/01/2017	13	25	25	106	110	4	483	1	54	0	M178_25-Nov_2B	0	0	magic
M178	2B	25	11	25-Nov	2016	31/01/2017	13	25	25	106	110	4	483	1	55	0	M178_25-Nov_2B	0	0	magic
M178	2B	25	11	25-Nov	2016	31/01/2017	13	25	25	106	110	4	483	1	56	0	M178_25-Nov_2B	0	0	magic
M178	2B	25	11	25-Nov	2016	31/01/2017	13	25	25	106	110	4	483	1	57	0	M178_25-Nov_2B	0	0	magic
M178	2B	25	11	25-Nov	2016	31/01/2017	13	25	25	106	110	4	483	1	58	0	M178_25-Nov_2B	0	0	magic
M178	2B	25	11	25-Nov	2016	31/01/2017	13	25	25	106	110	4	483	1	59	0	M178_25-Nov_2B	0	0	magic
M178	2B	25	11	25-Nov	2016	31/01/2017	13	25	25	106	110	4	483	1	60	0	M178_25-Nov_2B	0	0	magic
M178	2B	25	11	25-Nov	2016	31/01/2017	13	25	25	106	110	4	483	1	61	0	M178_25-Nov_2B	0	0	magic
M178	2B	19	4	19-Apr	2016		6	33	34	144	145	1	475	3	1	0	M178_19-Apr_2B	0	0	magic
M178	2B	19	4	19-Apr	2016		6	33	34	144	145	1	475	3	2	4	M178_19-Apr_2B	2.75862069	2.777777778	magic
M178	2B	19	4	19-Apr	2016		6	33	34	144	145	1	475	3	3	25	M178_19-Apr_2B	17.24137931	17.36111111	magic
M178	2B	19	4	19-Apr	2016		6	33	34	144	145	1	475	3	4	39	M178_19-Apr_2B	26.89655172	27.08333333	magic
M178	2B	19	4	19-Apr	2016		6	33	34	144	145	1	475	3	5	22	M178_19-Apr_2B	15.17241379	15.27777778	magic
M178	2B	19	4	19-Apr	2016		6	33	34	144	145	1	475	3	6	15	M178_19-Apr_2B	10.34482759	10.41666667	magic
M178	2B	19	4	19-Apr	2016		6	33	34	144	145	1	475	3	7	10	M178_19-Apr_2B	6.896551724	6.944444444	magic
M178	2B	19	4	19-Apr	2016		6	33	34	144	145	1	475	3	8	8	M178_19-Apr_2B	5.517241379	5.555555556	magic
M178	2B	19	4	19-Apr	2016		6	33	34	144	145	1	475	3	9	2	M178_19-Apr_2B	1.379310345	1.388888889	magic
M178	2B	19	4	19-Apr	2016		6	33	34	144	145	1	475	3	10	1	M178_19-Apr_2B	0.689655172	0.694444444	magic
M178	2B	19	4	19-Apr	2016		6	33	34	144	145	1	475	3	11	0	M178_19-Apr_2B	0	0	magic
M178	2B	19	4	19-Apr	2016		6	33	34	144	145	1	475	3	12	0	M178_19-Apr_2B	0	0	magic
M178	2B	19	4	19-Apr	2016		6	33	34	144	145	1	475	3	13	0	M178_19-Apr_2B	0	0	magic
M178	2B	19	4	19-Apr	2016		6	33	34	144	145	1	475	3	14	0	M178_19-Apr_2B	0	0	magic
M178	2B	19	4	19-Apr	2016		6	33	34	144	145	1	475	3	15	0	M178_19-Apr_2B	0	0	magic
M178	2B	19	4	19-Apr	2016		6	33	34	144	145	1	475	3	16	0	M178_19-Apr_2B	0	0	magic
M178	2B	19	4	19-Apr	2016		6	33	34	144	145	1	475	3	17	0	M178_19-Apr_2B	0	0	magic
M178	2B	19	4	19-Apr	2016		6	33	34	144	145	1	475	3	18	0	M178_19-Apr_2B	0	0	magic
M178	2B	19	4	19-Apr	2016		6	33	34	144	145	1	475	3	19	0	M178_19-Apr_2B	0	0	magic
M178	2B	19	4	19-Apr	2016		6	33	34	144	145	1	475	3	20	0	M178_19-Apr_2B	0	0	magic
M178	2B	19	4	19-Apr	2016		6	33	34	144	145	1	475	3	21	0	M178_19-Apr_2B	0	0	magic
M178	2B	19	4	19-Apr	2016		6	33	34	144	145	1	475	3	22	0	M178_19-Apr_2B	0	0	magic
M178	2B	19	4	19-Apr	2016		6	33	34	144	145	1	475	3	23	0	M178_19-Apr_2B	0	0	magic
M178	2B	19	4	19-Apr	2016		6	33	34	144	145	1	475	3	24	0	M178_19-Apr_2B	0	0	magic
M178	2B	19	4	19-Apr	2016		6	33	34	144	145	1	475	3	25	0	M178_19-Apr_2B	0	0	magic
M178	2B	19	4	19-Apr	2016		6	33	34	144	145	1	475	3	26	0	M178_19-Apr_2B	0	0	magic
M178	2B	19	4	19-Apr	2016		6	33	34	144	145	1	475	3	27	0	M178_19-Apr_2B	0	0	magic
M178	2B	19	4	19-Apr	2016		6	33	34	144	145	1	475	3	28	0	M178_19-Apr_2B	0	0	magic
M178	2B	19	4	19-Apr	2016		6	33	34	144	145	1	475	3	29	2	M178_19-Apr_2B	1.379310345	1.388888889	magic
M178	2B	19	4	19-Apr	2016		6	33	34	144	145	1	475	3	30	2	M178_19-Apr_2B	1.379310345	1.388888889	magic
M178	2B	19	4	19-Apr	2016		6	33	34	144	145	1	475	3	31	2	M178_19-Apr_2B	1.379310345	1.388888889	magic
M178	2B	19	4	19-Apr	2016		6	33	34	144	145	1	475	3	32	1	M178_19-Apr_2B	0.689655172	0.694444444	magic
M178	2B	19	4	19-Apr	2016		6	33	34	144	145	1	475	3	33	2	M178_19-Apr_2B	1.379310345	1.388888889	magic
M178	2B	19	4	19-Apr	2016		6	33	34	144	145	1	475	3	34	0	M178_19-Apr_2B	0	0	magic
M178	2B	19	4	19-Apr	2016		6	33	34	144	145	1	475	3	35	0	M178_19-Apr_2B	0	0	magic
M178	2B	19	4	19-Apr	2016		6	33	34	144	145	1	475	3	36	1	M178_19-Apr_2B	0.689655172	0.694444444	magic
M178	2B	19	4	19-Apr	2016		6	33	34	144	145	1	475	3	37	0	M178_19-Apr_2B	0	0	magic
M178	2B	19	4	19-Apr	2016		6	33	34	144	145	1	475	3	38	0	M178_19-Apr_2B	0	0	magic
M178	2B	19	4	19-Apr	2016		6	33	34	144	145	1	475	3	39	0	M178_19-Apr_2B	0	0	magic
M178	2B	19	4	19-Apr	2016		6	33	34	144	145	1	475	3	40	1	M178_19-Apr_2B	0.689655172	0.694444444	magic
M178	2B	19	4	19-Apr	2016		6	33	34	144	145	1	475	3	41	0	M178_19-Apr_2B	0	0	magic
M178	2B	19	4	19-Apr	2016		6	33	34	144	145	1	475	3	42	1	M178_19-Apr_2B	0.689655172	0.694444444	magic
M178	2B	19	4	19-Apr	2016		6	33	34	144	145	1	475	3	43	0	M178_19-Apr_2B	0	0	magic
M178	2B	19	4	19-Apr	2016		6	33	34	144	145	1	475	3	44	1	M178_19-Apr_2B	0.689655172	0.694444444	magic
M178	2B	19	4	19-Apr	2016		6	33	34	144	145	1	475	3	45	1	M178_19-Apr_2B	0.689655172	0.694444444	magic
M178	2B	19	4	19-Apr	2016		6	33	34	144	145	1	475	3	46	0	M178_19-Apr_2B	0	0	magic
M178	2B	19	4	19-Apr	2016		6	33	34	144	145	1	475	3	47	2	M178_19-Apr_2B	1.379310345	1.388888889	magic
M178	2B	19	4	19-Apr	2016		6	33	34	144	145	1	475	3	48	0	M178_19-Apr_2B	0	0	magic
M178	2B	19	4	19-Apr	2016		6	33	34	144	145	1	475	3	49	2	M178_19-Apr_2B	1.379310345	1.388888889	magic
M178	2B	19	4	19-Apr	2016		6	33	34	144	145	1	475	3	50	0	M178_19-Apr_2B	0	0	magic
M178	2B	19	4	19-Apr	2016		6	33	34	144	145	1	475	3	51	0	M178_19-Apr_2B	0	0	magic
M178	3	14	4	13-Apr	2016		6	30	34	99	182	83	473	1	1	0	M178_13-Apr_3	0	0	magic
M178	3	14	4	13-Apr	2016		6	30	34	99	182	83	473	1	2	0	M178_13-Apr_3	0	0	magic
M178	3	14	4	13-Apr	2016		6	30	34	99	182	83	473	1	3	12	M178_13-Apr_3	6.593406593	12.12121212	magic
M178	3	14	4	13-Apr	2016		6	30	34	99	182	83	473	1	4	47	M178_13-Apr_3	25.82417582	47.47474747	magic
M178	3	14	4	13-Apr	2016		6	30	34	99	182	83	473	1	5	11	M178_13-Apr_3	6.043956044	11.11111111	magic
M178	3	14	4	13-Apr	2016		6	30	34	99	182	83	473	1	6	17	M178_13-Apr_3	9.340659341	17.17171717	magic
M178	3	14	4	13-Apr	2016		6	30	34	99	182	83	473	1	7	10	M178_13-Apr_3	5.494505495	10.1010101	magic
M178	3	14	4	13-Apr	2016		6	30	34	99	182	83	473	1	8	1	M178_13-Apr_3	0.549450549	1.01010101	magic
M178	3	14	4	13-Apr	2016		6	30	34	99	182	83	473	1	9	0	M178_13-Apr_3	0	0	magic
M178	3	14	4	13-Apr	2016		6	30	34	99	182	83	473	1	10	0	M178_13-Apr_3	0	0	magic
M178	3	14	4	13-Apr	2016		6	30	34	99	182	83	473	1	11	0	M178_13-Apr_3	0	0	magic
M178	3	14	4	13-Apr	2016		6	30	34	99	182	83	473	1	12	0	M178_13-Apr_3	0	0	magic
M178	3	14	4	13-Apr	2016		6	30	34	99	182	83	473	1	13	0	M178_13-Apr_3	0	0	magic
M178	3	14	4	13-Apr	2016		6	30	34	99	182	83	473	1	14	1	M178_13-Apr_3	0.549450549	1.01010101	magic
M178	3	14	4	13-Apr	2016		6	30	34	99	182	83	473	1	15	0	M178_13-Apr_3	0	0	magic
M178	3	14	4	13-Apr	2016		6	30	34	99	182	83	473	1	16	0	M178_13-Apr_3	0	0	magic
M178	3	14	4	13-Apr	2016		6	30	34	99	182	83	473	1	17	0	M178_13-Apr_3	0	0	magic
M178	3	14	4	13-Apr	2016		6	30	34	99	182	83	473	1	18	0	M178_13-Apr_3	0	0	magic
M178	3	14	4	13-Apr	2016		6	30	34	99	182	83	473	1	19	0	M178_13-Apr_3	0	0	magic
M178	3	14	4	13-Apr	2016		6	30	34	99	182	83	473	1	20	0	M178_13-Apr_3	0	0	magic
M178	3	14	4	13-Apr	2016		6	30	34	99	182	83	473	1	21	0	M178_13-Apr_3	0	0	magic
M178	3	14	4	13-Apr	2016		6	30	34	99	182	83	473	1	22	0	M178_13-Apr_3	0	0	magic
M178	3	14	4	13-Apr	2016		6	30	34	99	182	83	473	1	23	0	M178_13-Apr_3	0	0	magic
M178	3	14	4	13-Apr	2016		6	30	34	99	182	83	473	1	24	0	M178_13-Apr_3	0	0	magic
M178	3b	25	11	25-Nov	2016	4/1/2017	13	25	25	78	86	8	484	2	1	0	M178_25-Nov_3b	0	0	magic
M178	3b	25	11	25-Nov	2016	4/1/2017	13	25	25	78	86	8	484	2	2	0	M178_25-Nov_3b	0	0	magic
M178	3b	25	11	25-Nov	2016	4/1/2017	13	25	25	78	86	8	484	2	3	15	M178_25-Nov_3b	17.44186047	19.23076923	magic
M178	3b	25	11	25-Nov	2016	4/1/2017	13	25	25	78	86	8	484	2	4	20	M178_25-Nov_3b	23.25581395	25.64102564	magic
M178	3b	25	11	25-Nov	2016	4/1/2017	13	25	25	78	86	8	484	2	5	12	M178_25-Nov_3b	13.95348837	15.38461538	magic
M178	3b	25	11	25-Nov	2016	4/1/2017	13	25	25	78	86	8	484	2	6	7	M178_25-Nov_3b	8.139534884	8.974358974	magic
M178	3b	25	11	25-Nov	2016	4/1/2017	13	25	25	78	86	8	484	2	7	3	M178_25-Nov_3b	3.488372093	3.846153846	magic
M178	3b	25	11	25-Nov	2016	4/1/2017	13	25	25	78	86	8	484	2	8	0	M178_25-Nov_3b	0	0	magic
M178	3b	25	11	25-Nov	2016	4/1/2017	13	25	25	78	86	8	484	2	9	0	M178_25-Nov_3b	0	0	magic
M178	3b	25	11	25-Nov	2016	4/1/2017	13	25	25	78	86	8	484	2	10	0	M178_25-Nov_3b	0	0	magic
M178	3b	25	11	25-Nov	2016	4/1/2017	13	25	25	78	86	8	484	2	11	0	M178_25-Nov_3b	0	0	magic
M178	3b	25	11	25-Nov	2016	4/1/2017	13	25	25	78	86	8	484	2	12	0	M178_25-Nov_3b	0	0	magic
M178	3b	25	11	25-Nov	2016	4/1/2017	13	25	25	78	86	8	484	2	13	8	M178_25-Nov_3b	9.302325581	10.25641026	magic
M178	3b	25	11	25-Nov	2016	4/1/2017	13	25	25	78	86	8	484	2	14	0	M178_25-Nov_3b	0	0	magic
M178	3b	25	11	25-Nov	2016	4/1/2017	13	25	25	78	86	8	484	2	15	0	M178_25-Nov_3b	0	0	magic
M178	3b	25	11	25-Nov	2016	4/1/2017	13	25	25	78	86	8	484	2	16	0	M178_25-Nov_3b	0	0	magic
M178	3b	25	11	25-Nov	2016	4/1/2017	13	25	25	78	86	8	484	2	17	0	M178_25-Nov_3b	0	0	magic
M178	3b	25	11	25-Nov	2016	4/1/2017	13	25	25	78	86	8	484	2	18	0	M178_25-Nov_3b	0	0	magic
M178	3b	25	11	25-Nov	2016	4/1/2017	13	25	25	78	86	8	484	2	19	0	M178_25-Nov_3b	0	0	magic
M178	3b	25	11	25-Nov	2016	4/1/2017	13	25	25	78	86	8	484	2	20	0	M178_25-Nov_3b	0	0	magic
M178	3b	25	11	25-Nov	2016	4/1/2017	13	25	25	78	86	8	484	2	21	0	M178_25-Nov_3b	0	0	magic
M178	3b	25	11	25-Nov	2016	4/1/2017	13	25	25	78	86	8	484	2	22	0	M178_25-Nov_3b	0	0	magic
M178	3b	25	11	25-Nov	2016	4/1/2017	13	25	25	78	86	8	484	2	23	0	M178_25-Nov_3b	0	0	magic
M178	3b	25	11	25-Nov	2016	4/1/2017	13	25	25	78	86	8	484	2	24	0	M178_25-Nov_3b	0	0	magic
M178	3b	25	11	25-Nov	2016	4/1/2017	13	25	25	78	86	8	484	2	25	0	M178_25-Nov_3b	0	0	magic
M178	3b	25	11	25-Nov	2016	4/1/2017	13	25	25	78	86	8	484	2	26	0	M178_25-Nov_3b	0	0	magic
M178	3b	25	11	25-Nov	2016	4/1/2017	13	25	25	78	86	8	484	2	27	0	M178_25-Nov_3b	0	0	magic
M178	3b	25	11	25-Nov	2016	4/1/2017	13	25	25	78	86	8	484	2	28	0	M178_25-Nov_3b	0	0	magic
M178	3b	25	11	25-Nov	2016	4/1/2017	13	25	25	78	86	8	484	2	29	0	M178_25-Nov_3b	0	0	magic
M178	3b	25	11	25-Nov	2016	4/1/2017	13	25	25	78	86	8	484	2	30	0	M178_25-Nov_3b	0	0	magic
M178	3b	25	11	25-Nov	2016	4/1/2017	13	25	25	78	86	8	484	2	31	0	M178_25-Nov_3b	0	0	magic
M178	3b	25	11	25-Nov	2016	4/1/2017	13	25	25	78	86	8	484	2	32	1	M178_25-Nov_3b	1.162790698	1.282051282	magic
M178	3b	25	11	25-Nov	2016	4/1/2017	13	25	25	78	86	8	484	2	33	0	M178_25-Nov_3b	0	0	magic
M178	3b	25	11	25-Nov	2016	4/1/2017	13	25	25	78	86	8	484	2	34	1	M178_25-Nov_3b	1.162790698	1.282051282	magic
M178	3b	25	11	25-Nov	2016	4/1/2017	13	25	25	78	86	8	484	2	35	1	M178_25-Nov_3b	1.162790698	1.282051282	magic
M178	3b	25	11	25-Nov	2016	4/1/2017	13	25	25	78	86	8	484	2	36	1	M178_25-Nov_3b	1.162790698	1.282051282	magic
M178	3b	25	11	25-Nov	2016	4/1/2017	13	25	25	78	86	8	484	2	37	0	M178_25-Nov_3b	0	0	magic
M178	3b	25	11	25-Nov	2016	4/1/2017	13	25	25	78	86	8	484	2	38	0	M178_25-Nov_3b	0	0	magic
M178	3b	25	11	25-Nov	2016	4/1/2017	13	25	25	78	86	8	484	2	39	0	M178_25-Nov_3b	0	0	magic
M178	3b	25	11	25-Nov	2016	4/1/2017	13	25	25	78	86	8	484	2	40	0	M178_25-Nov_3b	0	0	magic
M178	3b	25	11	25-Nov	2016	4/1/2017	13	25	25	78	86	8	484	2	41	0	M178_25-Nov_3b	0	0	magic
M178	3b	25	11	25-Nov	2016	4/1/2017	13	25	25	78	86	8	484	2	42	0	M178_25-Nov_3b	0	0	magic
M178	3b	25	11	25-Nov	2016	4/1/2017	13	25	25	78	86	8	484	2	43	1	M178_25-Nov_3b	1.162790698	1.282051282	magic
M178	3b	25	11	25-Nov	2016	4/1/2017	13	25	25	78	86	8	484	2	44	0	M178_25-Nov_3b	0	0	magic
M178	3b	25	11	25-Nov	2016	4/1/2017	13	25	25	78	86	8	484	2	45	0	M178_25-Nov_3b	0	0	magic
M178	3b	25	11	25-Nov	2016	4/1/2017	13	25	25	78	86	8	484	2	46	0	M178_25-Nov_3b	0	0	magic
M178	3b	25	11	25-Nov	2016	4/1/2017	13	25	25	78	86	8	484	2	47	1	M178_25-Nov_3b	1.162790698	1.282051282	magic
M178	3b	25	11	25-Nov	2016	4/1/2017	13	25	25	78	86	8	484	2	48	0	M178_25-Nov_3b	0	0	magic
M178	3b	25	11	25-Nov	2016	4/1/2017	13	25	25	78	86	8	484	2	49	0	M178_25-Nov_3b	0	0	magic
M178	3b	25	11	25-Nov	2016	4/1/2017	13	25	25	78	86	8	484	2	50	2	M178_25-Nov_3b	2.325581395	2.564102564	magic
M178	3b	25	11	25-Nov	2016	4/1/2017	13	25	25	78	86	8	484	2	51	0	M178_25-Nov_3b	0	0	magic
M178	3b	25	11	25-Nov	2016	4/1/2017	13	25	25	78	86	8	484	2	52	0	M178_25-Nov_3b	0	0	magic
M178	3b	25	11	25-Nov	2016	4/1/2017	13	25	25	78	86	8	484	2	53	0	M178_25-Nov_3b	0	0	magic
M178	3b	25	11	25-Nov	2016	4/1/2017	13	25	25	78	86	8	484	2	54	0	M178_25-Nov_3b	0	0	magic
M178	3b	25	11	25-Nov	2016	4/1/2017	13	25	25	78	86	8	484	2	55	0	M178_25-Nov_3b	0	0	magic
M178	3b	25	11	25-Nov	2016	4/1/2017	13	25	25	78	86	8	484	2	56	0	M178_25-Nov_3b	0	0	magic
M178	3b	25	11	25-Nov	2016	4/1/2017	13	25	25	78	86	8	484	2	57	0	M178_25-Nov_3b	0	0	magic
M178	3b	25	11	25-Nov	2016	4/1/2017	13	25	25	78	86	8	484	2	58	1	M178_25-Nov_3b	1.162790698	1.282051282	magic
M178	3b	25	11	25-Nov	2016	4/1/2017	13	25	25	78	86	8	484	2	59	2	M178_25-Nov_3b	2.325581395	2.564102564	magic
M178	3b	25	11	25-Nov	2016	4/1/2017	13	25	25	78	86	8	484	2	60	2	M178_25-Nov_3b	2.325581395	2.564102564	magic
M178	3b	25	11	25-Nov	2016	4/1/2017	13	25	25	78	86	8	484	2	61	0	M178_25-Nov_3b	0	0	magic
M178	4	19	4	19-Apr	2016		6	34	34	128	138	10	476	4	1	0	M178_19-Apr_4	0	0	magic
M178	4	19	4	19-Apr	2016		6	34	34	128	138	10	476	4	2	0	M178_19-Apr_4	0	0	magic
M178	4	19	4	19-Apr	2016		6	34	34	128	138	10	476	4	3	8	M178_19-Apr_4	5.797101449	6.25	magic
M178	4	19	4	19-Apr	2016		6	34	34	128	138	10	476	4	4	10	M178_19-Apr_4	7.246376812	7.8125	magic
M178	4	19	4	19-Apr	2016		6	34	34	128	138	10	476	4	5	12	M178_19-Apr_4	8.695652174	9.375	magic
M178	4	19	4	19-Apr	2016		6	34	34	128	138	10	476	4	6	15	M178_19-Apr_4	10.86956522	11.71875	magic
M178	4	19	4	19-Apr	2016		6	34	34	128	138	10	476	4	7	20	M178_19-Apr_4	14.49275362	15.625	magic
M178	4	19	4	19-Apr	2016		6	34	34	128	138	10	476	4	8	9	M178_19-Apr_4	6.52173913	7.03125	magic
M178	4	19	4	19-Apr	2016		6	34	34	128	138	10	476	4	9	11	M178_19-Apr_4	7.971014493	8.59375	magic
M178	4	19	4	19-Apr	2016		6	34	34	128	138	10	476	4	10	7	M178_19-Apr_4	5.072463768	5.46875	magic
M178	4	19	4	19-Apr	2016		6	34	34	128	138	10	476	4	11	1	M178_19-Apr_4	0.724637681	0.78125	magic
M178	4	19	4	19-Apr	2016		6	34	34	128	138	10	476	4	12	1	M178_19-Apr_4	0.724637681	0.78125	magic
M178	4	19	4	19-Apr	2016		6	34	34	128	138	10	476	4	13	1	M178_19-Apr_4	0.724637681	0.78125	magic
M178	4	19	4	19-Apr	2016		6	34	34	128	138	10	476	4	14	0	M178_19-Apr_4	0	0	magic
M178	4	19	4	19-Apr	2016		6	34	34	128	138	10	476	4	15	0	M178_19-Apr_4	0	0	magic
M178	4	19	4	19-Apr	2016		6	34	34	128	138	10	476	4	16	0	M178_19-Apr_4	0	0	magic
M178	4	19	4	19-Apr	2016		6	34	34	128	138	10	476	4	17	0	M178_19-Apr_4	0	0	magic
M178	4	19	4	19-Apr	2016		6	34	34	128	138	10	476	4	18	0	M178_19-Apr_4	0	0	magic
M178	4	19	4	19-Apr	2016		6	34	34	128	138	10	476	4	19	0	M178_19-Apr_4	0	0	magic
M178	4	19	4	19-Apr	2016		6	34	34	128	138	10	476	4	20	0	M178_19-Apr_4	0	0	magic
M178	4	19	4	19-Apr	2016		6	34	34	128	138	10	476	4	21	0	M178_19-Apr_4	0	0	magic
M178	4	19	4	19-Apr	2016		6	34	34	128	138	10	476	4	22	1	M178_19-Apr_4	0.724637681	0.78125	magic
M178	4	19	4	19-Apr	2016		6	34	34	128	138	10	476	4	23	2	M178_19-Apr_4	1.449275362	1.5625	magic
M178	4	19	4	19-Apr	2016		6	34	34	128	138	10	476	4	24	1	M178_19-Apr_4	0.724637681	0.78125	magic
M178	4	19	4	19-Apr	2016		6	34	34	128	138	10	476	4	25	0	M178_19-Apr_4	0	0	magic
M178	4	19	4	19-Apr	2016		6	34	34	128	138	10	476	4	26	0	M178_19-Apr_4	0	0	magic
M178	4	19	4	19-Apr	2016		6	34	34	128	138	10	476	4	27	0	M178_19-Apr_4	0	0	magic
M178	4	19	4	19-Apr	2016		6	34	34	128	138	10	476	4	28	0	M178_19-Apr_4	0	0	magic
M178	4	19	4	19-Apr	2016		6	34	34	128	138	10	476	4	29	0	M178_19-Apr_4	0	0	magic
M178	4	19	4	19-Apr	2016		6	34	34	128	138	10	476	4	30	0	M178_19-Apr_4	0	0	magic
M178	4	19	4	19-Apr	2016		6	34	34	128	138	10	476	4	31	0	M178_19-Apr_4	0	0	magic
M178	4	19	4	19-Apr	2016		6	34	34	128	138	10	476	4	32	0	M178_19-Apr_4	0	0	magic
M178	4	19	4	19-Apr	2016		6	34	34	128	138	10	476	4	33	1	M178_19-Apr_4	0.724637681	0.78125	magic
M178	4	19	4	19-Apr	2016		6	34	34	128	138	10	476	4	34	0	M178_19-Apr_4	0	0	magic
M178	4	19	4	19-Apr	2016		6	34	34	128	138	10	476	4	35	1	M178_19-Apr_4	0.724637681	0.78125	magic
M178	4	19	4	19-Apr	2016		6	34	34	128	138	10	476	4	36	1	M178_19-Apr_4	0.724637681	0.78125	magic
M178	4	19	4	19-Apr	2016		6	34	34	128	138	10	476	4	37	7	M178_19-Apr_4	5.072463768	5.46875	magic
M178	4	19	4	19-Apr	2016		6	34	34	128	138	10	476	4	38	4	M178_19-Apr_4	2.898550725	3.125	magic
M178	4	19	4	19-Apr	2016		6	34	34	128	138	10	476	4	39	3	M178_19-Apr_4	2.173913043	2.34375	magic
M178	4	19	4	19-Apr	2016		6	34	34	128	138	10	476	4	40	2	M178_19-Apr_4	1.449275362	1.5625	magic
M178	4	19	4	19-Apr	2016		6	34	34	128	138	10	476	4	41	0	M178_19-Apr_4	0	0	magic
M178	4	19	4	19-Apr	2016		6	34	34	128	138	10	476	4	42	0	M178_19-Apr_4	0	0	magic
M178	4	19	4	19-Apr	2016		6	34	34	128	138	10	476	4	43	1	M178_19-Apr_4	0.724637681	0.78125	magic
M178	4	19	4	19-Apr	2016		6	34	34	128	138	10	476	4	44	2	M178_19-Apr_4	1.449275362	1.5625	magic
M178	4	19	4	19-Apr	2016		6	34	34	128	138	10	476	4	45	1	M178_19-Apr_4	0.724637681	0.78125	magic
M178	4	19	4	19-Apr	2016		6	34	34	128	138	10	476	4	46	0	M178_19-Apr_4	0	0	magic
M178	4	19	4	19-Apr	2016		6	34	34	128	138	10	476	4	47	0	M178_19-Apr_4	0	0	magic
M178	4	19	4	19-Apr	2016		6	34	34	128	138	10	476	4	48	2	M178_19-Apr_4	1.449275362	1.5625	magic
M178	4	19	4	19-Apr	2016		6	34	34	128	138	10	476	4	49	1	M178_19-Apr_4	0.724637681	0.78125	magic
M178	4	19	4	19-Apr	2016		6	34	34	128	138	10	476	4	50	2	M178_19-Apr_4	1.449275362	1.5625	magic
M178	4	19	4	19-Apr	2016		6	34	34	128	138	10	476	4	51	1	M178_19-Apr_4	0.724637681	0.78125	magic
M178	5	14	4	13-Apr	2016		6	33	34	62	150	88	474	2	1	0	M178_13-Apr_5	0	0	magic
M178	5	14	4	13-Apr	2016		6	33	34	62	150	88	474	2	2	0	M178_13-Apr_5	0	0	magic
M178	5	14	4	13-Apr	2016		6	33	34	62	150	88	474	2	3	7	M178_13-Apr_5	4.666666667	11.29032258	magic
M178	5	14	4	13-Apr	2016		6	33	34	62	150	88	474	2	4	18	M178_13-Apr_5	12	29.03225806	magic
M178	5	14	4	13-Apr	2016		6	33	34	62	150	88	474	2	5	15	M178_13-Apr_5	10	24.19354839	magic
M178	5	14	4	13-Apr	2016		6	33	34	62	150	88	474	2	6	11	M178_13-Apr_5	7.333333333	17.74193548	magic
M178	5	14	4	13-Apr	2016		6	33	34	62	150	88	474	2	7	8	M178_13-Apr_5	5.333333333	12.90322581	magic
M178	5	14	4	13-Apr	2016		6	33	34	62	150	88	474	2	8	2	M178_13-Apr_5	1.333333333	3.225806452	magic
M178	5	14	4	13-Apr	2016		6	33	34	62	150	88	474	2	9	1	M178_13-Apr_5	0.666666667	1.612903226	magic
M178	5	14	4	13-Apr	2016		6	33	34	62	150	88	474	2	10	0	M178_13-Apr_5	0	0	magic
M178	5	14	4	13-Apr	2016		6	33	34	62	150	88	474	2	11	0	M178_13-Apr_5	0	0	magic
M178	5	14	4	13-Apr	2016		6	33	34	62	150	88	474	2	12	0	M178_13-Apr_5	0	0	magic
M178	5	14	4	13-Apr	2016		6	33	34	62	150	88	474	2	13	0	M178_13-Apr_5	0	0	magic
M178	5	14	4	13-Apr	2016		6	33	34	62	150	88	474	2	14	0	M178_13-Apr_5	0	0	magic
M178	5	14	4	13-Apr	2016		6	33	34	62	150	88	474	2	15	0	M178_13-Apr_5	0	0	magic
M178	5	14	4	13-Apr	2016		6	33	34	62	150	88	474	2	16	0	M178_13-Apr_5	0	0	magic
M178	5	14	4	13-Apr	2016		6	33	34	62	150	88	474	2	17	0	M178_13-Apr_5	0	0	magic
M178	5	14	4	13-Apr	2016		6	33	34	62	150	88	474	2	18	0	M178_13-Apr_5	0	0	magic
M178	5	14	4	13-Apr	2016		6	33	34	62	150	88	474	2	19	0	M178_13-Apr_5	0	0	magic
M178	5	14	4	13-Apr	2016		6	33	34	62	150	88	474	2	20	0	M178_13-Apr_5	0	0	magic
M178	5	14	4	13-Apr	2016		6	33	34	62	150	88	474	2	21	0	M178_13-Apr_5	0	0	magic
M178	5	14	4	13-Apr	2016		6	33	34	62	150	88	474	2	22	0	M178_13-Apr_5	0	0	magic
M178	5	14	4	13-Apr	2016		6	33	34	62	150	88	474	2	23	0	M178_13-Apr_5	0	0	magic
M178	5	14	4	13-Apr	2016		6	33	34	62	150	88	474	2	24	1	M178_13-Apr_5	0.666666667	1.612903226	magic
M178	6	19	4	19-Apr	2016		6	33	34	119	140	21	477	5	1	0	M178_19-Apr_6	0	0	magic
M178	6	19	4	19-Apr	2016		6	33	34	119	140	21	477	5	2	0	M178_19-Apr_6	0	0	magic
M178	6	19	4	19-Apr	2016		6	33	34	119	140	21	477	5	3	8	M178_19-Apr_6	5.714285714	6.722689076	magic
M178	6	19	4	19-Apr	2016		6	33	34	119	140	21	477	5	4	17	M178_19-Apr_6	12.14285714	14.28571429	magic
M178	6	19	4	19-Apr	2016		6	33	34	119	140	21	477	5	5	14	M178_19-Apr_6	10	11.76470588	magic
M178	6	19	4	19-Apr	2016		6	33	34	119	140	21	477	5	6	20	M178_19-Apr_6	14.28571429	16.80672269	magic
M178	6	19	4	19-Apr	2016		6	33	34	119	140	21	477	5	7	16	M178_19-Apr_6	11.42857143	13.44537815	magic
M178	6	19	4	19-Apr	2016		6	33	34	119	140	21	477	5	8	10	M178_19-Apr_6	7.142857143	8.403361345	magic
M178	6	19	4	19-Apr	2016		6	33	34	119	140	21	477	5	9	2	M178_19-Apr_6	1.428571429	1.680672269	magic
M178	6	19	4	19-Apr	2016		6	33	34	119	140	21	477	5	10	4	M178_19-Apr_6	2.857142857	3.361344538	magic
M178	6	19	4	19-Apr	2016		6	33	34	119	140	21	477	5	11	1	M178_19-Apr_6	0.714285714	0.840336134	magic
M178	6	19	4	19-Apr	2016		6	33	34	119	140	21	477	5	12	0	M178_19-Apr_6	0	0	magic
M178	6	19	4	19-Apr	2016		6	33	34	119	140	21	477	5	13	0	M178_19-Apr_6	0	0	magic
M178	6	19	4	19-Apr	2016		6	33	34	119	140	21	477	5	14	0	M178_19-Apr_6	0	0	magic
M178	6	19	4	19-Apr	2016		6	33	34	119	140	21	477	5	15	0	M178_19-Apr_6	0	0	magic
M178	6	19	4	19-Apr	2016		6	33	34	119	140	21	477	5	16	0	M178_19-Apr_6	0	0	magic
M178	6	19	4	19-Apr	2016		6	33	34	119	140	21	477	5	17	0	M178_19-Apr_6	0	0	magic
M178	6	19	4	19-Apr	2016		6	33	34	119	140	21	477	5	18	0	M178_19-Apr_6	0	0	magic
M178	6	19	4	19-Apr	2016		6	33	34	119	140	21	477	5	19	0	M178_19-Apr_6	0	0	magic
M178	6	19	4	19-Apr	2016		6	33	34	119	140	21	477	5	20	0	M178_19-Apr_6	0	0	magic
M178	6	19	4	19-Apr	2016		6	33	34	119	140	21	477	5	21	0	M178_19-Apr_6	0	0	magic
M178	6	19	4	19-Apr	2016		6	33	34	119	140	21	477	5	22	0	M178_19-Apr_6	0	0	magic
M178	6	19	4	19-Apr	2016		6	33	34	119	140	21	477	5	23	0	M178_19-Apr_6	0	0	magic
M178	6	19	4	19-Apr	2016		6	33	34	119	140	21	477	5	24	0	M178_19-Apr_6	0	0	magic
M178	6	19	4	19-Apr	2016		6	33	34	119	140	21	477	5	25	0	M178_19-Apr_6	0	0	magic
M178	6	19	4	19-Apr	2016		6	33	34	119	140	21	477	5	26	0	M178_19-Apr_6	0	0	magic
M178	6	19	4	19-Apr	2016		6	33	34	119	140	21	477	5	27	0	M178_19-Apr_6	0	0	magic
M178	6	19	4	19-Apr	2016		6	33	34	119	140	21	477	5	28	0	M178_19-Apr_6	0	0	magic
M178	6	19	4	19-Apr	2016		6	33	34	119	140	21	477	5	29	0	M178_19-Apr_6	0	0	magic
M178	6	19	4	19-Apr	2016		6	33	34	119	140	21	477	5	30	0	M178_19-Apr_6	0	0	magic
M178	6	19	4	19-Apr	2016		6	33	34	119	140	21	477	5	31	0	M178_19-Apr_6	0	0	magic
M178	6	19	4	19-Apr	2016		6	33	34	119	140	21	477	5	32	0	M178_19-Apr_6	0	0	magic
M178	6	19	4	19-Apr	2016		6	33	34	119	140	21	477	5	33	0	M178_19-Apr_6	0	0	magic
M178	6	19	4	19-Apr	2016		6	33	34	119	140	21	477	5	34	0	M178_19-Apr_6	0	0	magic
M178	6	19	4	19-Apr	2016		6	33	34	119	140	21	477	5	35	1	M178_19-Apr_6	0.714285714	0.840336134	magic
M178	6	19	4	19-Apr	2016		6	33	34	119	140	21	477	5	36	0	M178_19-Apr_6	0	0	magic
M178	6	19	4	19-Apr	2016		6	33	34	119	140	21	477	5	37	0	M178_19-Apr_6	0	0	magic
M178	6	19	4	19-Apr	2016		6	33	34	119	140	21	477	5	38	0	M178_19-Apr_6	0	0	magic
M178	6	19	4	19-Apr	2016		6	33	34	119	140	21	477	5	39	0	M178_19-Apr_6	0	0	magic
M178	6	19	4	19-Apr	2016		6	33	34	119	140	21	477	5	40	0	M178_19-Apr_6	0	0	magic
M178	6	19	4	19-Apr	2016		6	33	34	119	140	21	477	5	41	0	M178_19-Apr_6	0	0	magic
M178	6	19	4	19-Apr	2016		6	33	34	119	140	21	477	5	42	3	M178_19-Apr_6	2.142857143	2.521008403	magic
M178	6	19	4	19-Apr	2016		6	33	34	119	140	21	477	5	43	3	M178_19-Apr_6	2.142857143	2.521008403	magic
M178	6	19	4	19-Apr	2016		6	33	34	119	140	21	477	5	44	2	M178_19-Apr_6	1.428571429	1.680672269	magic
M178	6	19	4	19-Apr	2016		6	33	34	119	140	21	477	5	45	2	M178_19-Apr_6	1.428571429	1.680672269	magic
M178	6	19	4	19-Apr	2016		6	33	34	119	140	21	477	5	46	0	M178_19-Apr_6	0	0	magic
M178	6	19	4	19-Apr	2016		6	33	34	119	140	21	477	5	47	6	M178_19-Apr_6	4.285714286	5.042016807	magic
M178	6	19	4	19-Apr	2016		6	33	34	119	140	21	477	5	48	2	M178_19-Apr_6	1.428571429	1.680672269	magic
M178	6	19	4	19-Apr	2016		6	33	34	119	140	21	477	5	49	2	M178_19-Apr_6	1.428571429	1.680672269	magic
M178	6	19	4	19-Apr	2016		6	33	34	119	140	21	477	5	50	3	M178_19-Apr_6	2.142857143	2.521008403	magic
M178	6	19	4	19-Apr	2016		6	33	34	119	140	21	477	5	51	3	M178_19-Apr_6	2.142857143	2.521008403	magic
