# Supplementary material for: An ABA-GA bistable switch can account for natural variation in the variability of Arabidopsis seed germination time
Source: eLife. 2021 Jun 1;10:e59485. doi: 10.7554/eLife.59485 (PMC8169117; doi:10.7554/eLife.59485)
Supplement: Figure 2—source data 2. [file elife-59485-fig2-data2.tds]

Magic_line	Plant	Silique	Top_or_bottom	comments	Sowing.day	Sowing.month	Sowing_date	Year	Scoring.date	second.scoring	DAR	Total.germinated	Total	NonGer.at.end.of.scoring.period	comments.1	id	day	number	name	perc	perc_total_ger	germ_frac	cumgerm_frac
178	1	11	NA	NA	14	6	14-Jun	2017	02/08/2017	05/09/2017	33	45	50	5	NA	31	1	0	178_1_11_14-Jun	0	0	0	0
178	1	13	NA	NA	14	6	14-Jun	2017	02/08/2017	05/09/2017	33	15	58	43	NA	32	1	0	178_1_13_14-Jun	0	0	0	0
178	2	11	NA	NA	14	6	14-Jun	2017	02/08/2017	05/09/2017	33	63	63	0	NA	33	1	0	178_2_11_14-Jun	0	0	0	0
178	3	11	NA	NA	14	6	14-Jun	2017	02/08/2017	05/09/2017	33	44	48	4	NA	34	1	0	178_3_11_14-Jun	0	0	0	0
178	3	13	NA	NA	14	6	14-Jun	2017	02/08/2017	05/09/2017	33	46	64	18	NA	35	1	0	178_3_13_14-Jun	0	0	0	0
178	1	11	NA	NA	22	9	22-Sep	2017	13/12/2017	NA	44	7	31	24	NA	75	1	0	178_1_11_22-Sep	0	0	0	0
178	1	13	NA	NA	22	9	22-Sep	2017	13/12/2017	NA	44	22	36	14	NA	76	1	0	178_1_13_22-Sep	0	0	0	0
178	3	13	NA	NA	22	9	22-Sep	2017	13/12/2017	NA	44	49	62	13	NA	77	1	0	178_3_13_22-Sep	0	0	0	0
178	4	11	NA	NA	22	9	22-Sep	2017	13/12/2017	NA	44	5	63	58	NA	78	1	0	178_4_11_22-Sep	0	0	0	0
178	4	13	NA	NA	22	9	22-Sep	2017	13/12/2017	NA	44	12	32	20	NA	79	1	0	178_4_13_22-Sep	0	0	0	0
178	5	11	NA	NA	22	9	22-Sep	2017	13/12/2017	NA	44	5	60	55	NA	80	1	0	178_5_11_22-Sep	0	0	0	0
178	1	11	NA	NA	14	6	14-Jun	2017	02/08/2017	05/09/2017	33	45	50	5	NA	31	2	0	178_1_11_14-Jun	0	0	0	0
178	1	13	NA	NA	14	6	14-Jun	2017	02/08/2017	05/09/2017	33	15	58	43	NA	32	2	0	178_1_13_14-Jun	0	0	0	0
178	2	11	NA	NA	14	6	14-Jun	2017	02/08/2017	05/09/2017	33	63	63	0	NA	33	2	0	178_2_11_14-Jun	0	0	0	0
178	3	11	NA	NA	14	6	14-Jun	2017	02/08/2017	05/09/2017	33	44	48	4	NA	34	2	0	178_3_11_14-Jun	0	0	0	0
178	3	13	NA	NA	14	6	14-Jun	2017	02/08/2017	05/09/2017	33	46	64	18	NA	35	2	1	178_3_13_14-Jun	1.5625	2.17391304347826	0.0217391304347826	0.0217391304347826
178	1	11	NA	NA	22	9	22-Sep	2017	13/12/2017	NA	44	7	31	24	NA	75	2	0	178_1_11_22-Sep	0	0	0	0
178	1	13	NA	NA	22	9	22-Sep	2017	13/12/2017	NA	44	22	36	14	NA	76	2	0	178_1_13_22-Sep	0	0	0	0
178	3	13	NA	NA	22	9	22-Sep	2017	13/12/2017	NA	44	49	62	13	NA	77	2	0	178_3_13_22-Sep	0	0	0	0
178	4	11	NA	NA	22	9	22-Sep	2017	13/12/2017	NA	44	5	63	58	NA	78	2	0	178_4_11_22-Sep	0	0	0	0
178	4	13	NA	NA	22	9	22-Sep	2017	13/12/2017	NA	44	12	32	20	NA	79	2	0	178_4_13_22-Sep	0	0	0	0
178	5	11	NA	NA	22	9	22-Sep	2017	13/12/2017	NA	44	5	60	55	NA	80	2	0	178_5_11_22-Sep	0	0	0	0
178	1	11	NA	NA	14	6	14-Jun	2017	02/08/2017	05/09/2017	33	45	50	5	NA	31	3	1	178_1_11_14-Jun	2	2.22222222222222	0.0222222222222222	0.0222222222222222
178	1	13	NA	NA	14	6	14-Jun	2017	02/08/2017	05/09/2017	33	15	58	43	NA	32	3	0	178_1_13_14-Jun	0	0	0	0
178	2	11	NA	NA	14	6	14-Jun	2017	02/08/2017	05/09/2017	33	63	63	0	NA	33	3	3	178_2_11_14-Jun	4.76190476190476	4.76190476190476	0.0476190476190476	0.0476190476190476
178	3	11	NA	NA	14	6	14-Jun	2017	02/08/2017	05/09/2017	33	44	48	4	NA	34	3	1	178_3_11_14-Jun	2.08333333333333	2.27272727272727	0.0227272727272727	0.0227272727272727
178	3	13	NA	NA	14	6	14-Jun	2017	02/08/2017	05/09/2017	33	46	64	18	NA	35	3	0	178_3_13_14-Jun	0	0	0	0.0217391304347826
178	1	11	NA	NA	22	9	22-Sep	2017	13/12/2017	NA	44	7	31	24	NA	75	3	0	178_1_11_22-Sep	0	0	0	0
178	1	13	NA	NA	22	9	22-Sep	2017	13/12/2017	NA	44	22	36	14	NA	76	3	0	178_1_13_22-Sep	0	0	0	0
178	3	13	NA	NA	22	9	22-Sep	2017	13/12/2017	NA	44	49	62	13	NA	77	3	8	178_3_13_22-Sep	12.9032258064516	16.3265306122449	0.163265306122449	0.163265306122449
178	4	11	NA	NA	22	9	22-Sep	2017	13/12/2017	NA	44	5	63	58	NA	78	3	0	178_4_11_22-Sep	0	0	0	0
178	4	13	NA	NA	22	9	22-Sep	2017	13/12/2017	NA	44	12	32	20	NA	79	3	0	178_4_13_22-Sep	0	0	0	0
178	5	11	NA	NA	22	9	22-Sep	2017	13/12/2017	NA	44	5	60	55	NA	80	3	0	178_5_11_22-Sep	0	0	0	0
178	1	11	NA	NA	14	6	14-Jun	2017	02/08/2017	05/09/2017	33	45	50	5	NA	31	4	2	178_1_11_14-Jun	4	4.44444444444444	0.0444444444444444	0.0666666666666667
178	1	13	NA	NA	14	6	14-Jun	2017	02/08/2017	05/09/2017	33	15	58	43	NA	32	4	0	178_1_13_14-Jun	0	0	0	0
178	2	11	NA	NA	14	6	14-Jun	2017	02/08/2017	05/09/2017	33	63	63	0	NA	33	4	5	178_2_11_14-Jun	7.93650793650794	7.93650793650794	0.0793650793650794	0.126984126984127
178	3	11	NA	NA	14	6	14-Jun	2017	02/08/2017	05/09/2017	33	44	48	4	NA	34	4	0	178_3_11_14-Jun	0	0	0	0.0227272727272727
178	3	13	NA	NA	14	6	14-Jun	2017	02/08/2017	05/09/2017	33	46	64	18	NA	35	4	3	178_3_13_14-Jun	4.6875	6.52173913043478	0.0652173913043478	0.0869565217391304
178	1	11	NA	NA	22	9	22-Sep	2017	13/12/2017	NA	44	7	31	24	NA	75	4	0	178_1_11_22-Sep	0	0	0	0
178	1	13	NA	NA	22	9	22-Sep	2017	13/12/2017	NA	44	22	36	14	NA	76	4	0	178_1_13_22-Sep	0	0	0	0
178	3	13	NA	NA	22	9	22-Sep	2017	13/12/2017	NA	44	49	62	13	NA	77	4	1	178_3_13_22-Sep	1.61290322580645	2.04081632653061	0.0204081632653061	0.183673469387755
178	4	11	NA	NA	22	9	22-Sep	2017	13/12/2017	NA	44	5	63	58	NA	78	4	0	178_4_11_22-Sep	0	0	0	0
178	4	13	NA	NA	22	9	22-Sep	2017	13/12/2017	NA	44	12	32	20	NA	79	4	0	178_4_13_22-Sep	0	0	0	0
178	5	11	NA	NA	22	9	22-Sep	2017	13/12/2017	NA	44	5	60	55	NA	80	4	0	178_5_11_22-Sep	0	0	0	0
178	1	11	NA	NA	14	6	14-Jun	2017	02/08/2017	05/09/2017	33	45	50	5	NA	31	5	8	178_1_11_14-Jun	16	17.7777777777778	0.177777777777778	0.244444444444444
178	1	13	NA	NA	14	6	14-Jun	2017	02/08/2017	05/09/2017	33	15	58	43	NA	32	5	1	178_1_13_14-Jun	1.72413793103448	6.66666666666667	0.0666666666666667	0.0666666666666667
178	2	11	NA	NA	14	6	14-Jun	2017	02/08/2017	05/09/2017	33	63	63	0	NA	33	5	8	178_2_11_14-Jun	12.6984126984127	12.6984126984127	0.126984126984127	0.253968253968254
178	3	11	NA	NA	14	6	14-Jun	2017	02/08/2017	05/09/2017	33	44	48	4	NA	34	5	0	178_3_11_14-Jun	0	0	0	0.0227272727272727
178	3	13	NA	NA	14	6	14-Jun	2017	02/08/2017	05/09/2017	33	46	64	18	NA	35	5	0	178_3_13_14-Jun	0	0	0	0.0869565217391304
178	1	11	NA	NA	22	9	22-Sep	2017	13/12/2017	NA	44	7	31	24	NA	75	5	3	178_1_11_22-Sep	9.67741935483871	42.8571428571429	0.428571428571429	0.428571428571429
178	1	13	NA	NA	22	9	22-Sep	2017	13/12/2017	NA	44	22	36	14	NA	76	5	0	178_1_13_22-Sep	0	0	0	0
178	3	13	NA	NA	22	9	22-Sep	2017	13/12/2017	NA	44	49	62	13	NA	77	5	6	178_3_13_22-Sep	9.67741935483871	12.2448979591837	0.122448979591837	0.306122448979592
178	4	11	NA	NA	22	9	22-Sep	2017	13/12/2017	NA	44	5	63	58	NA	78	5	0	178_4_11_22-Sep	0	0	0	0
178	4	13	NA	NA	22	9	22-Sep	2017	13/12/2017	NA	44	12	32	20	NA	79	5	1	178_4_13_22-Sep	3.125	8.33333333333333	0.0833333333333333	0.0833333333333333
178	5	11	NA	NA	22	9	22-Sep	2017	13/12/2017	NA	44	5	60	55	NA	80	5	0	178_5_11_22-Sep	0	0	0	0
178	1	11	NA	NA	14	6	14-Jun	2017	02/08/2017	05/09/2017	33	45	50	5	NA	31	6	4	178_1_11_14-Jun	8	8.88888888888889	0.0888888888888889	0.333333333333333
178	1	13	NA	NA	14	6	14-Jun	2017	02/08/2017	05/09/2017	33	15	58	43	NA	32	6	0	178_1_13_14-Jun	0	0	0	0.0666666666666667
178	2	11	NA	NA	14	6	14-Jun	2017	02/08/2017	05/09/2017	33	63	63	0	NA	33	6	2	178_2_11_14-Jun	3.17460317460317	3.17460317460317	0.0317460317460317	0.285714285714286
178	3	11	NA	NA	14	6	14-Jun	2017	02/08/2017	05/09/2017	33	44	48	4	NA	34	6	0	178_3_11_14-Jun	0	0	0	0.0227272727272727
178	3	13	NA	NA	14	6	14-Jun	2017	02/08/2017	05/09/2017	33	46	64	18	NA	35	6	3	178_3_13_14-Jun	4.6875	6.52173913043478	0.0652173913043478	0.152173913043478
178	1	11	NA	NA	22	9	22-Sep	2017	13/12/2017	NA	44	7	31	24	NA	75	6	1	178_1_11_22-Sep	3.2258064516129	14.2857142857143	0.142857142857143	0.571428571428571
178	1	13	NA	NA	22	9	22-Sep	2017	13/12/2017	NA	44	22	36	14	NA	76	6	2	178_1_13_22-Sep	5.55555555555556	9.09090909090909	0.0909090909090909	0.0909090909090909
178	3	13	NA	NA	22	9	22-Sep	2017	13/12/2017	NA	44	49	62	13	NA	77	6	5	178_3_13_22-Sep	8.06451612903226	10.2040816326531	0.102040816326531	0.408163265306122
178	4	11	NA	NA	22	9	22-Sep	2017	13/12/2017	NA	44	5	63	58	NA	78	6	0	178_4_11_22-Sep	0	0	0	0
178	4	13	NA	NA	22	9	22-Sep	2017	13/12/2017	NA	44	12	32	20	NA	79	6	0	178_4_13_22-Sep	0	0	0	0.0833333333333333
178	5	11	NA	NA	22	9	22-Sep	2017	13/12/2017	NA	44	5	60	55	NA	80	6	2	178_5_11_22-Sep	3.33333333333333	40	0.4	0.4
178	1	11	NA	NA	14	6	14-Jun	2017	02/08/2017	05/09/2017	33	45	50	5	NA	31	7	4	178_1_11_14-Jun	8	8.88888888888889	0.0888888888888889	0.422222222222222
178	1	13	NA	NA	14	6	14-Jun	2017	02/08/2017	05/09/2017	33	15	58	43	NA	32	7	1	178_1_13_14-Jun	1.72413793103448	6.66666666666667	0.0666666666666667	0.133333333333333
178	2	11	NA	NA	14	6	14-Jun	2017	02/08/2017	05/09/2017	33	63	63	0	NA	33	7	11	178_2_11_14-Jun	17.4603174603175	17.4603174603175	0.174603174603175	0.46031746031746
178	3	11	NA	NA	14	6	14-Jun	2017	02/08/2017	05/09/2017	33	44	48	4	NA	34	7	3	178_3_11_14-Jun	6.25	6.81818181818182	0.0681818181818182	0.0909090909090909
178	3	13	NA	NA	14	6	14-Jun	2017	02/08/2017	05/09/2017	33	46	64	18	NA	35	7	0	178_3_13_14-Jun	0	0	0	0.152173913043478
178	1	13	NA	NA	22	9	22-Sep	2017	13/12/2017	NA	44	22	36	14	NA	76	7	4	178_1_13_22-Sep	11.1111111111111	18.1818181818182	0.181818181818182	0.272727272727273
178	3	13	NA	NA	22	9	22-Sep	2017	13/12/2017	NA	44	49	62	13	NA	77	7	10	178_3_13_22-Sep	16.1290322580645	20.4081632653061	0.204081632653061	0.612244897959184
178	4	11	NA	NA	22	9	22-Sep	2017	13/12/2017	NA	44	5	63	58	NA	78	7	0	178_4_11_22-Sep	0	0	0	0
178	4	13	NA	NA	22	9	22-Sep	2017	13/12/2017	NA	44	12	32	20	NA	79	7	1	178_4_13_22-Sep	3.125	8.33333333333333	0.0833333333333333	0.166666666666667
178	5	11	NA	NA	22	9	22-Sep	2017	13/12/2017	NA	44	5	60	55	NA	80	7	1	178_5_11_22-Sep	1.66666666666667	20	0.2	0.6
178	1	11	NA	NA	14	6	14-Jun	2017	02/08/2017	05/09/2017	33	45	50	5	NA	31	8	1	178_1_11_14-Jun	2	2.22222222222222	0.0222222222222222	0.444444444444444
178	1	13	NA	NA	14	6	14-Jun	2017	02/08/2017	05/09/2017	33	15	58	43	NA	32	8	0	178_1_13_14-Jun	0	0	0	0.133333333333333
178	2	11	NA	NA	14	6	14-Jun	2017	02/08/2017	05/09/2017	33	63	63	0	NA	33	8	6	178_2_11_14-Jun	9.52380952380952	9.52380952380952	0.0952380952380952	0.555555555555556
178	3	11	NA	NA	14	6	14-Jun	2017	02/08/2017	05/09/2017	33	44	48	4	NA	34	8	2	178_3_11_14-Jun	4.16666666666667	4.54545454545455	0.0454545454545455	0.136363636363636
178	3	13	NA	NA	14	6	14-Jun	2017	02/08/2017	05/09/2017	33	46	64	18	NA	35	8	3	178_3_13_14-Jun	4.6875	6.52173913043478	0.0652173913043478	0.217391304347826
178	1	11	NA	NA	22	9	22-Sep	2017	13/12/2017	NA	44	7	31	24	NA	75	8	1	178_1_11_22-Sep	3.2258064516129	14.2857142857143	0.142857142857143	0.714285714285714
178	1	13	NA	NA	22	9	22-Sep	2017	13/12/2017	NA	44	22	36	14	NA	76	8	2	178_1_13_22-Sep	5.55555555555556	9.09090909090909	0.0909090909090909	0.363636363636364
178	3	13	NA	NA	22	9	22-Sep	2017	13/12/2017	NA	44	49	62	13	NA	77	8	3	178_3_13_22-Sep	4.83870967741935	6.12244897959184	0.0612244897959184	0.673469387755102
178	4	11	NA	NA	22	9	22-Sep	2017	13/12/2017	NA	44	5	63	58	NA	78	8	2	178_4_11_22-Sep	3.17460317460317	40	0.4	0.4
178	4	13	NA	NA	22	9	22-Sep	2017	13/12/2017	NA	44	12	32	20	NA	79	8	0	178_4_13_22-Sep	0	0	0	0.166666666666667
178	5	11	NA	NA	22	9	22-Sep	2017	13/12/2017	NA	44	5	60	55	NA	80	8	0	178_5_11_22-Sep	0	0	0	0.6
178	1	11	NA	NA	14	6	14-Jun	2017	02/08/2017	05/09/2017	33	45	50	5	NA	31	9	0	178_1_11_14-Jun	0	0	0	0.444444444444444
178	1	13	NA	NA	14	6	14-Jun	2017	02/08/2017	05/09/2017	33	15	58	43	NA	32	9	0	178_1_13_14-Jun	0	0	0	0.133333333333333
178	2	11	NA	NA	14	6	14-Jun	2017	02/08/2017	05/09/2017	33	63	63	0	NA	33	9	6	178_2_11_14-Jun	9.52380952380952	9.52380952380952	0.0952380952380952	0.650793650793651
178	3	11	NA	NA	14	6	14-Jun	2017	02/08/2017	05/09/2017	33	44	48	4	NA	34	9	4	178_3_11_14-Jun	8.33333333333333	9.09090909090909	0.0909090909090909	0.227272727272727
178	3	13	NA	NA	14	6	14-Jun	2017	02/08/2017	05/09/2017	33	46	64	18	NA	35	9	3	178_3_13_14-Jun	4.6875	6.52173913043478	0.0652173913043478	0.282608695652174
178	1	11	NA	NA	22	9	22-Sep	2017	13/12/2017	NA	44	7	31	24	NA	75	9	0	178_1_11_22-Sep	0	0	0	0.714285714285714
178	1	13	NA	NA	22	9	22-Sep	2017	13/12/2017	NA	44	22	36	14	NA	76	9	1	178_1_13_22-Sep	2.77777777777778	4.54545454545455	0.0454545454545455	0.409090909090909
178	3	13	NA	NA	22	9	22-Sep	2017	13/12/2017	NA	44	49	62	13	NA	77	9	3	178_3_13_22-Sep	4.83870967741935	6.12244897959184	0.0612244897959184	0.73469387755102
178	4	11	NA	NA	22	9	22-Sep	2017	13/12/2017	NA	44	5	63	58	NA	78	9	0	178_4_11_22-Sep	0	0	0	0.4
178	4	13	NA	NA	22	9	22-Sep	2017	13/12/2017	NA	44	12	32	20	NA	79	9	0	178_4_13_22-Sep	0	0	0	0.166666666666667
178	5	11	NA	NA	22	9	22-Sep	2017	13/12/2017	NA	44	5	60	55	NA	80	9	0	178_5_11_22-Sep	0	0	0	0.6
178	1	11	NA	NA	14	6	14-Jun	2017	02/08/2017	05/09/2017	33	45	50	5	NA	31	10	1	178_1_11_14-Jun	2	2.22222222222222	0.0222222222222222	0.466666666666667
178	1	13	NA	NA	14	6	14-Jun	2017	02/08/2017	05/09/2017	33	15	58	43	NA	32	10	2	178_1_13_14-Jun	3.44827586206897	13.3333333333333	0.133333333333333	0.266666666666667
178	2	11	NA	NA	14	6	14-Jun	2017	02/08/2017	05/09/2017	33	63	63	0	NA	33	10	3	178_2_11_14-Jun	4.76190476190476	4.76190476190476	0.0476190476190476	0.698412698412698
178	3	11	NA	NA	14	6	14-Jun	2017	02/08/2017	05/09/2017	33	44	48	4	NA	34	10	3	178_3_11_14-Jun	6.25	6.81818181818182	0.0681818181818182	0.295454545454545
178	3	13	NA	NA	14	6	14-Jun	2017	02/08/2017	05/09/2017	33	46	64	18	NA	35	10	1	178_3_13_14-Jun	1.5625	2.17391304347826	0.0217391304347826	0.304347826086957
178	1	11	NA	NA	22	9	22-Sep	2017	13/12/2017	NA	44	7	31	24	NA	75	10	0	178_1_11_22-Sep	0	0	0	0.714285714285714
178	1	13	NA	NA	22	9	22-Sep	2017	13/12/2017	NA	44	22	36	14	NA	76	10	2	178_1_13_22-Sep	5.55555555555556	9.09090909090909	0.0909090909090909	0.5
178	3	13	NA	NA	22	9	22-Sep	2017	13/12/2017	NA	44	49	62	13	NA	77	10	2	178_3_13_22-Sep	3.2258064516129	4.08163265306122	0.0408163265306122	0.775510204081633
178	4	11	NA	NA	22	9	22-Sep	2017	13/12/2017	NA	44	5	63	58	NA	78	10	0	178_4_11_22-Sep	0	0	0	0.4
178	4	13	NA	NA	22	9	22-Sep	2017	13/12/2017	NA	44	12	32	20	NA	79	10	2	178_4_13_22-Sep	6.25	16.6666666666667	0.166666666666667	0.333333333333333
178	5	11	NA	NA	22	9	22-Sep	2017	13/12/2017	NA	44	5	60	55	NA	80	10	0	178_5_11_22-Sep	0	0	0	0.6
178	1	11	NA	NA	14	6	14-Jun	2017	02/08/2017	05/09/2017	33	45	50	5	NA	31	11	0	178_1_11_14-Jun	0	0	0	0.466666666666667
178	1	13	NA	NA	14	6	14-Jun	2017	02/08/2017	05/09/2017	33	15	58	43	NA	32	11	0	178_1_13_14-Jun	0	0	0	0.266666666666667
178	2	11	NA	NA	14	6	14-Jun	2017	02/08/2017	05/09/2017	33	63	63	0	NA	33	11	0	178_2_11_14-Jun	0	0	0	0.698412698412698
178	3	11	NA	NA	14	6	14-Jun	2017	02/08/2017	05/09/2017	33	44	48	4	NA	34	11	0	178_3_11_14-Jun	0	0	0	0.295454545454545
178	3	13	NA	NA	14	6	14-Jun	2017	02/08/2017	05/09/2017	33	46	64	18	NA	35	11	0	178_3_13_14-Jun	0	0	0	0.304347826086957
178	1	11	NA	NA	22	9	22-Sep	2017	13/12/2017	NA	44	7	31	24	NA	75	11	0	178_1_11_22-Sep	0	0	0	0.714285714285714
178	1	13	NA	NA	22	9	22-Sep	2017	13/12/2017	NA	44	22	36	14	NA	76	11	2	178_1_13_22-Sep	5.55555555555556	9.09090909090909	0.0909090909090909	0.590909090909091
178	3	13	NA	NA	22	9	22-Sep	2017	13/12/2017	NA	44	49	62	13	NA	77	11	1	178_3_13_22-Sep	1.61290322580645	2.04081632653061	0.0204081632653061	0.795918367346939
178	4	11	NA	NA	22	9	22-Sep	2017	13/12/2017	NA	44	5	63	58	NA	78	11	0	178_4_11_22-Sep	0	0	0	0.4
178	4	13	NA	NA	22	9	22-Sep	2017	13/12/2017	NA	44	12	32	20	NA	79	11	2	178_4_13_22-Sep	6.25	16.6666666666667	0.166666666666667	0.5
178	5	11	NA	NA	22	9	22-Sep	2017	13/12/2017	NA	44	5	60	55	NA	80	11	0	178_5_11_22-Sep	0	0	0	0.6
178	1	11	NA	NA	14	6	14-Jun	2017	02/08/2017	05/09/2017	33	45	50	5	NA	31	12	5	178_1_11_14-Jun	10	11.1111111111111	0.111111111111111	0.577777777777778
178	1	13	NA	NA	14	6	14-Jun	2017	02/08/2017	05/09/2017	33	15	58	43	NA	32	12	0	178_1_13_14-Jun	0	0	0	0.266666666666667
178	2	11	NA	NA	14	6	14-Jun	2017	02/08/2017	05/09/2017	33	63	63	0	NA	33	12	1	178_2_11_14-Jun	1.58730158730159	1.58730158730159	0.0158730158730159	0.714285714285714
178	3	11	NA	NA	14	6	14-Jun	2017	02/08/2017	05/09/2017	33	44	48	4	NA	34	12	3	178_3_11_14-Jun	6.25	6.81818181818182	0.0681818181818182	0.363636363636364
178	3	13	NA	NA	14	6	14-Jun	2017	02/08/2017	05/09/2017	33	46	64	18	NA	35	12	1	178_3_13_14-Jun	1.5625	2.17391304347826	0.0217391304347826	0.326086956521739
178	1	11	NA	NA	22	9	22-Sep	2017	13/12/2017	NA	44	7	31	24	NA	75	12	0	178_1_11_22-Sep	0	0	0	0.714285714285714
178	1	13	NA	NA	22	9	22-Sep	2017	13/12/2017	NA	44	22	36	14	NA	76	12	0	178_1_13_22-Sep	0	0	0	0.590909090909091
178	3	13	NA	NA	22	9	22-Sep	2017	13/12/2017	NA	44	49	62	13	NA	77	12	0	178_3_13_22-Sep	0	0	0	0.795918367346939
178	4	11	NA	NA	22	9	22-Sep	2017	13/12/2017	NA	44	5	63	58	NA	78	12	0	178_4_11_22-Sep	0	0	0	0.4
178	4	13	NA	NA	22	9	22-Sep	2017	13/12/2017	NA	44	12	32	20	NA	79	12	0	178_4_13_22-Sep	0	0	0	0.5
178	5	11	NA	NA	22	9	22-Sep	2017	13/12/2017	NA	44	5	60	55	NA	80	12	0	178_5_11_22-Sep	0	0	0	0.6
178	1	11	NA	NA	14	6	14-Jun	2017	02/08/2017	05/09/2017	33	45	50	5	NA	31	13	0	178_1_11_14-Jun	0	0	0	0.577777777777778
178	1	13	NA	NA	14	6	14-Jun	2017	02/08/2017	05/09/2017	33	15	58	43	NA	32	13	0	178_1_13_14-Jun	0	0	0	0.266666666666667
178	2	11	NA	NA	14	6	14-Jun	2017	02/08/2017	05/09/2017	33	63	63	0	NA	33	13	0	178_2_11_14-Jun	0	0	0	0.714285714285714
178	3	11	NA	NA	14	6	14-Jun	2017	02/08/2017	05/09/2017	33	44	48	4	NA	34	13	0	178_3_11_14-Jun	0	0	0	0.363636363636364
178	3	13	NA	NA	14	6	14-Jun	2017	02/08/2017	05/09/2017	33	46	64	18	NA	35	13	1	178_3_13_14-Jun	1.5625	2.17391304347826	0.0217391304347826	0.347826086956522
178	1	11	NA	NA	22	9	22-Sep	2017	13/12/2017	NA	44	7	31	24	NA	75	13	0	178_1_11_22-Sep	0	0	0	0.714285714285714
178	1	13	NA	NA	22	9	22-Sep	2017	13/12/2017	NA	44	22	36	14	NA	76	13	0	178_1_13_22-Sep	0	0	0	0.590909090909091
178	3	13	NA	NA	22	9	22-Sep	2017	13/12/2017	NA	44	49	62	13	NA	77	13	0	178_3_13_22-Sep	0	0	0	0.795918367346939
178	4	11	NA	NA	22	9	22-Sep	2017	13/12/2017	NA	44	5	63	58	NA	78	13	0	178_4_11_22-Sep	0	0	0	0.4
178	4	13	NA	NA	22	9	22-Sep	2017	13/12/2017	NA	44	12	32	20	NA	79	13	0	178_4_13_22-Sep	0	0	0	0.5
178	5	11	NA	NA	22	9	22-Sep	2017	13/12/2017	NA	44	5	60	55	NA	80	13	0	178_5_11_22-Sep	0	0	0	0.6
178	1	11	NA	NA	14	6	14-Jun	2017	02/08/2017	05/09/2017	33	45	50	5	NA	31	14	0	178_1_11_14-Jun	0	0	0	0.577777777777778
178	1	13	NA	NA	14	6	14-Jun	2017	02/08/2017	05/09/2017	33	15	58	43	NA	32	14	0	178_1_13_14-Jun	0	0	0	0.266666666666667
178	2	11	NA	NA	14	6	14-Jun	2017	02/08/2017	05/09/2017	33	63	63	0	NA	33	14	0	178_2_11_14-Jun	0	0	0	0.714285714285714
178	3	11	NA	NA	14	6	14-Jun	2017	02/08/2017	05/09/2017	33	44	48	4	NA	34	14	0	178_3_11_14-Jun	0	0	0	0.363636363636364
178	3	13	NA	NA	14	6	14-Jun	2017	02/08/2017	05/09/2017	33	46	64	18	NA	35	14	0	178_3_13_14-Jun	0	0	0	0.347826086956522
178	1	11	NA	NA	22	9	22-Sep	2017	13/12/2017	NA	44	7	31	24	NA	75	14	0	178_1_11_22-Sep	0	0	0	0.714285714285714
178	1	13	NA	NA	22	9	22-Sep	2017	13/12/2017	NA	44	22	36	14	NA	76	14	0	178_1_13_22-Sep	0	0	0	0.590909090909091
178	3	13	NA	NA	22	9	22-Sep	2017	13/12/2017	NA	44	49	62	13	NA	77	14	0	178_3_13_22-Sep	0	0	0	0.795918367346939
178	4	11	NA	NA	22	9	22-Sep	2017	13/12/2017	NA	44	5	63	58	NA	78	14	0	178_4_11_22-Sep	0	0	0	0.4
178	4	13	NA	NA	22	9	22-Sep	2017	13/12/2017	NA	44	12	32	20	NA	79	14	0	178_4_13_22-Sep	0	0	0	0.5
178	5	11	NA	NA	22	9	22-Sep	2017	13/12/2017	NA	44	5	60	55	NA	80	14	0	178_5_11_22-Sep	0	0	0	0.6
178	1	11	NA	NA	14	6	14-Jun	2017	02/08/2017	05/09/2017	33	45	50	5	NA	31	15	0	178_1_11_14-Jun	0	0	0	0.577777777777778
178	1	13	NA	NA	14	6	14-Jun	2017	02/08/2017	05/09/2017	33	15	58	43	NA	32	15	0	178_1_13_14-Jun	0	0	0	0.266666666666667
178	2	11	NA	NA	14	6	14-Jun	2017	02/08/2017	05/09/2017	33	63	63	0	NA	33	15	0	178_2_11_14-Jun	0	0	0	0.714285714285714
178	3	11	NA	NA	14	6	14-Jun	2017	02/08/2017	05/09/2017	33	44	48	4	NA	34	15	0	178_3_11_14-Jun	0	0	0	0.363636363636364
178	3	13	NA	NA	14	6	14-Jun	2017	02/08/2017	05/09/2017	33	46	64	18	NA	35	15	0	178_3_13_14-Jun	0	0	0	0.347826086956522
178	1	11	NA	NA	22	9	22-Sep	2017	13/12/2017	NA	44	7	31	24	NA	75	15	0	178_1_11_22-Sep	0	0	0	0.714285714285714
178	1	13	NA	NA	22	9	22-Sep	2017	13/12/2017	NA	44	22	36	14	NA	76	15	0	178_1_13_22-Sep	0	0	0	0.590909090909091
178	3	13	NA	NA	22	9	22-Sep	2017	13/12/2017	NA	44	49	62	13	NA	77	15	0	178_3_13_22-Sep	0	0	0	0.795918367346939
178	4	11	NA	NA	22	9	22-Sep	2017	13/12/2017	NA	44	5	63	58	NA	78	15	0	178_4_11_22-Sep	0	0	0	0.4
178	4	13	NA	NA	22	9	22-Sep	2017	13/12/2017	NA	44	12	32	20	NA	79	15	0	178_4_13_22-Sep	0	0	0	0.5
178	5	11	NA	NA	22	9	22-Sep	2017	13/12/2017	NA	44	5	60	55	NA	80	15	0	178_5_11_22-Sep	0	0	0	0.6
178	1	11	NA	NA	14	6	14-Jun	2017	02/08/2017	05/09/2017	33	45	50	5	NA	31	16	0	178_1_11_14-Jun	0	0	0	0.577777777777778
178	1	13	NA	NA	14	6	14-Jun	2017	02/08/2017	05/09/2017	33	15	58	43	NA	32	16	0	178_1_13_14-Jun	0	0	0	0.266666666666667
178	2	11	NA	NA	14	6	14-Jun	2017	02/08/2017	05/09/2017	33	63	63	0	NA	33	16	0	178_2_11_14-Jun	0	0	0	0.714285714285714
178	3	11	NA	NA	14	6	14-Jun	2017	02/08/2017	05/09/2017	33	44	48	4	NA	34	16	0	178_3_11_14-Jun	0	0	0	0.363636363636364
178	3	13	NA	NA	14	6	14-Jun	2017	02/08/2017	05/09/2017	33	46	64	18	NA	35	16	0	178_3_13_14-Jun	0	0	0	0.347826086956522
178	1	11	NA	NA	22	9	22-Sep	2017	13/12/2017	NA	44	7	31	24	NA	75	16	0	178_1_11_22-Sep	0	0	0	0.714285714285714
178	1	13	NA	NA	22	9	22-Sep	2017	13/12/2017	NA	44	22	36	14	NA	76	16	0	178_1_13_22-Sep	0	0	0	0.590909090909091
178	3	13	NA	NA	22	9	22-Sep	2017	13/12/2017	NA	44	49	62	13	NA	77	16	0	178_3_13_22-Sep	0	0	0	0.795918367346939
178	4	11	NA	NA	22	9	22-Sep	2017	13/12/2017	NA	44	5	63	58	NA	78	16	0	178_4_11_22-Sep	0	0	0	0.4
178	4	13	NA	NA	22	9	22-Sep	2017	13/12/2017	NA	44	12	32	20	NA	79	16	0	178_4_13_22-Sep	0	0	0	0.5
178	5	11	NA	NA	22	9	22-Sep	2017	13/12/2017	NA	44	5	60	55	NA	80	16	0	178_5_11_22-Sep	0	0	0	0.6
178	1	11	NA	NA	14	6	14-Jun	2017	02/08/2017	05/09/2017	33	45	50	5	NA	31	17	0	178_1_11_14-Jun	0	0	0	0.577777777777778
178	1	13	NA	NA	14	6	14-Jun	2017	02/08/2017	05/09/2017	33	15	58	43	NA	32	17	0	178_1_13_14-Jun	0	0	0	0.266666666666667
178	2	11	NA	NA	14	6	14-Jun	2017	02/08/2017	05/09/2017	33	63	63	0	NA	33	17	0	178_2_11_14-Jun	0	0	0	0.714285714285714
178	3	11	NA	NA	14	6	14-Jun	2017	02/08/2017	05/09/2017	33	44	48	4	NA	34	17	0	178_3_11_14-Jun	0	0	0	0.363636363636364
178	3	13	NA	NA	14	6	14-Jun	2017	02/08/2017	05/09/2017	33	46	64	18	NA	35	17	0	178_3_13_14-Jun	0	0	0	0.347826086956522
178	1	11	NA	NA	22	9	22-Sep	2017	13/12/2017	NA	44	7	31	24	NA	75	17	0	178_1_11_22-Sep	0	0	0	0.714285714285714
178	1	13	NA	NA	22	9	22-Sep	2017	13/12/2017	NA	44	22	36	14	NA	76	17	0	178_1_13_22-Sep	0	0	0	0.590909090909091
178	3	13	NA	NA	22	9	22-Sep	2017	13/12/2017	NA	44	49	62	13	NA	77	17	0	178_3_13_22-Sep	0	0	0	0.795918367346939
178	4	11	NA	NA	22	9	22-Sep	2017	13/12/2017	NA	44	5	63	58	NA	78	17	0	178_4_11_22-Sep	0	0	0	0.4
178	4	13	NA	NA	22	9	22-Sep	2017	13/12/2017	NA	44	12	32	20	NA	79	17	0	178_4_13_22-Sep	0	0	0	0.5
178	5	11	NA	NA	22	9	22-Sep	2017	13/12/2017	NA	44	5	60	55	NA	80	17	0	178_5_11_22-Sep	0	0	0	0.6
178	1	11	NA	NA	14	6	14-Jun	2017	02/08/2017	05/09/2017	33	45	50	5	NA	31	18	0	178_1_11_14-Jun	0	0	0	0.577777777777778
178	1	13	NA	NA	14	6	14-Jun	2017	02/08/2017	05/09/2017	33	15	58	43	NA	32	18	0	178_1_13_14-Jun	0	0	0	0.266666666666667
178	2	11	NA	NA	14	6	14-Jun	2017	02/08/2017	05/09/2017	33	63	63	0	NA	33	18	0	178_2_11_14-Jun	0	0	0	0.714285714285714
178	3	11	NA	NA	14	6	14-Jun	2017	02/08/2017	05/09/2017	33	44	48	4	NA	34	18	0	178_3_11_14-Jun	0	0	0	0.363636363636364
178	3	13	NA	NA	14	6	14-Jun	2017	02/08/2017	05/09/2017	33	46	64	18	NA	35	18	0	178_3_13_14-Jun	0	0	0	0.347826086956522
178	1	11	NA	NA	22	9	22-Sep	2017	13/12/2017	NA	44	7	31	24	NA	75	18	0	178_1_11_22-Sep	0	0	0	0.714285714285714
178	1	13	NA	NA	22	9	22-Sep	2017	13/12/2017	NA	44	22	36	14	NA	76	18	0	178_1_13_22-Sep	0	0	0	0.590909090909091
178	3	13	NA	NA	22	9	22-Sep	2017	13/12/2017	NA	44	49	62	13	NA	77	18	0	178_3_13_22-Sep	0	0	0	0.795918367346939
178	4	11	NA	NA	22	9	22-Sep	2017	13/12/2017	NA	44	5	63	58	NA	78	18	0	178_4_11_22-Sep	0	0	0	0.4
178	4	13	NA	NA	22	9	22-Sep	2017	13/12/2017	NA	44	12	32	20	NA	79	18	0	178_4_13_22-Sep	0	0	0	0.5
178	5	11	NA	NA	22	9	22-Sep	2017	13/12/2017	NA	44	5	60	55	NA	80	18	0	178_5_11_22-Sep	0	0	0	0.6
178	1	11	NA	NA	14	6	14-Jun	2017	02/08/2017	05/09/2017	33	45	50	5	NA	31	19	0	178_1_11_14-Jun	0	0	0	0.577777777777778
178	1	13	NA	NA	14	6	14-Jun	2017	02/08/2017	05/09/2017	33	15	58	43	NA	32	19	0	178_1_13_14-Jun	0	0	0	0.266666666666667
178	2	11	NA	NA	14	6	14-Jun	2017	02/08/2017	05/09/2017	33	63	63	0	NA	33	19	0	178_2_11_14-Jun	0	0	0	0.714285714285714
178	3	11	NA	NA	14	6	14-Jun	2017	02/08/2017	05/09/2017	33	44	48	4	NA	34	19	0	178_3_11_14-Jun	0	0	0	0.363636363636364
178	3	13	NA	NA	14	6	14-Jun	2017	02/08/2017	05/09/2017	33	46	64	18	NA	35	19	0	178_3_13_14-Jun	0	0	0	0.347826086956522
178	1	11	NA	NA	22	9	22-Sep	2017	13/12/2017	NA	44	7	31	24	NA	75	19	0	178_1_11_22-Sep	0	0	0	0.714285714285714
178	1	13	NA	NA	22	9	22-Sep	2017	13/12/2017	NA	44	22	36	14	NA	76	19	0	178_1_13_22-Sep	0	0	0	0.590909090909091
178	3	13	NA	NA	22	9	22-Sep	2017	13/12/2017	NA	44	49	62	13	NA	77	19	0	178_3_13_22-Sep	0	0	0	0.795918367346939
178	4	11	NA	NA	22	9	22-Sep	2017	13/12/2017	NA	44	5	63	58	NA	78	19	0	178_4_11_22-Sep	0	0	0	0.4
178	4	13	NA	NA	22	9	22-Sep	2017	13/12/2017	NA	44	12	32	20	NA	79	19	0	178_4_13_22-Sep	0	0	0	0.5
178	5	11	NA	NA	22	9	22-Sep	2017	13/12/2017	NA	44	5	60	55	NA	80	19	0	178_5_11_22-Sep	0	0	0	0.6
178	1	11	NA	NA	14	6	14-Jun	2017	02/08/2017	05/09/2017	33	45	50	5	NA	31	20	0	178_1_11_14-Jun	0	0	0	0.577777777777778
178	1	13	NA	NA	14	6	14-Jun	2017	02/08/2017	05/09/2017	33	15	58	43	NA	32	20	0	178_1_13_14-Jun	0	0	0	0.266666666666667
178	2	11	NA	NA	14	6	14-Jun	2017	02/08/2017	05/09/2017	33	63	63	0	NA	33	20	0	178_2_11_14-Jun	0	0	0	0.714285714285714
178	3	11	NA	NA	14	6	14-Jun	2017	02/08/2017	05/09/2017	33	44	48	4	NA	34	20	0	178_3_11_14-Jun	0	0	0	0.363636363636364
178	3	13	NA	NA	14	6	14-Jun	2017	02/08/2017	05/09/2017	33	46	64	18	NA	35	20	0	178_3_13_14-Jun	0	0	0	0.347826086956522
178	1	11	NA	NA	22	9	22-Sep	2017	13/12/2017	NA	44	7	31	24	NA	75	20	0	178_1_11_22-Sep	0	0	0	0.714285714285714
178	1	13	NA	NA	22	9	22-Sep	2017	13/12/2017	NA	44	22	36	14	NA	76	20	0	178_1_13_22-Sep	0	0	0	0.590909090909091
178	3	13	NA	NA	22	9	22-Sep	2017	13/12/2017	NA	44	49	62	13	NA	77	20	0	178_3_13_22-Sep	0	0	0	0.795918367346939
178	4	11	NA	NA	22	9	22-Sep	2017	13/12/2017	NA	44	5	63	58	NA	78	20	0	178_4_11_22-Sep	0	0	0	0.4
178	4	13	NA	NA	22	9	22-Sep	2017	13/12/2017	NA	44	12	32	20	NA	79	20	0	178_4_13_22-Sep	0	0	0	0.5
178	5	11	NA	NA	22	9	22-Sep	2017	13/12/2017	NA	44	5	60	55	NA	80	20	0	178_5_11_22-Sep	0	0	0	0.6
178	1	11	NA	NA	14	6	14-Jun	2017	02/08/2017	05/09/2017	33	45	50	5	NA	31	21	0	178_1_11_14-Jun	0	0	0	0.577777777777778
178	1	13	NA	NA	14	6	14-Jun	2017	02/08/2017	05/09/2017	33	15	58	43	NA	32	21	0	178_1_13_14-Jun	0	0	0	0.266666666666667
178	2	11	NA	NA	14	6	14-Jun	2017	02/08/2017	05/09/2017	33	63	63	0	NA	33	21	0	178_2_11_14-Jun	0	0	0	0.714285714285714
178	3	11	NA	NA	14	6	14-Jun	2017	02/08/2017	05/09/2017	33	44	48	4	NA	34	21	0	178_3_11_14-Jun	0	0	0	0.363636363636364
178	3	13	NA	NA	14	6	14-Jun	2017	02/08/2017	05/09/2017	33	46	64	18	NA	35	21	0	178_3_13_14-Jun	0	0	0	0.347826086956522
178	1	11	NA	NA	22	9	22-Sep	2017	13/12/2017	NA	44	7	31	24	NA	75	21	0	178_1_11_22-Sep	0	0	0	0.714285714285714
178	1	13	NA	NA	22	9	22-Sep	2017	13/12/2017	NA	44	22	36	14	NA	76	21	0	178_1_13_22-Sep	0	0	0	0.590909090909091
178	3	13	NA	NA	22	9	22-Sep	2017	13/12/2017	NA	44	49	62	13	NA	77	21	0	178_3_13_22-Sep	0	0	0	0.795918367346939
178	4	11	NA	NA	22	9	22-Sep	2017	13/12/2017	NA	44	5	63	58	NA	78	21	0	178_4_11_22-Sep	0	0	0	0.4
178	4	13	NA	NA	22	9	22-Sep	2017	13/12/2017	NA	44	12	32	20	NA	79	21	0	178_4_13_22-Sep	0	0	0	0.5
178	5	11	NA	NA	22	9	22-Sep	2017	13/12/2017	NA	44	5	60	55	NA	80	21	0	178_5_11_22-Sep	0	0	0	0.6
178	1	11	NA	NA	14	6	14-Jun	2017	02/08/2017	05/09/2017	33	45	50	5	NA	31	22	0	178_1_11_14-Jun	0	0	0	0.577777777777778
178	1	13	NA	NA	14	6	14-Jun	2017	02/08/2017	05/09/2017	33	15	58	43	NA	32	22	0	178_1_13_14-Jun	0	0	0	0.266666666666667
178	2	11	NA	NA	14	6	14-Jun	2017	02/08/2017	05/09/2017	33	63	63	0	NA	33	22	0	178_2_11_14-Jun	0	0	0	0.714285714285714
178	3	11	NA	NA	14	6	14-Jun	2017	02/08/2017	05/09/2017	33	44	48	4	NA	34	22	0	178_3_11_14-Jun	0	0	0	0.363636363636364
178	3	13	NA	NA	14	6	14-Jun	2017	02/08/2017	05/09/2017	33	46	64	18	NA	35	22	0	178_3_13_14-Jun	0	0	0	0.347826086956522
178	1	11	NA	NA	22	9	22-Sep	2017	13/12/2017	NA	44	7	31	24	NA	75	22	0	178_1_11_22-Sep	0	0	0	0.714285714285714
178	1	13	NA	NA	22	9	22-Sep	2017	13/12/2017	NA	44	22	36	14	NA	76	22	0	178_1_13_22-Sep	0	0	0	0.590909090909091
178	3	13	NA	NA	22	9	22-Sep	2017	13/12/2017	NA	44	49	62	13	NA	77	22	0	178_3_13_22-Sep	0	0	0	0.795918367346939
178	4	11	NA	NA	22	9	22-Sep	2017	13/12/2017	NA	44	5	63	58	NA	78	22	0	178_4_11_22-Sep	0	0	0	0.4
178	4	13	NA	NA	22	9	22-Sep	2017	13/12/2017	NA	44	12	32	20	NA	79	22	0	178_4_13_22-Sep	0	0	0	0.5
178	5	11	NA	NA	22	9	22-Sep	2017	13/12/2017	NA	44	5	60	55	NA	80	22	0	178_5_11_22-Sep	0	0	0	0.6
178	1	11	NA	NA	14	6	14-Jun	2017	02/08/2017	05/09/2017	33	45	50	5	NA	31	23	0	178_1_11_14-Jun	0	0	0	0.577777777777778
178	1	13	NA	NA	14	6	14-Jun	2017	02/08/2017	05/09/2017	33	15	58	43	NA	32	23	0	178_1_13_14-Jun	0	0	0	0.266666666666667
178	2	11	NA	NA	14	6	14-Jun	2017	02/08/2017	05/09/2017	33	63	63	0	NA	33	23	0	178_2_11_14-Jun	0	0	0	0.714285714285714
178	3	11	NA	NA	14	6	14-Jun	2017	02/08/2017	05/09/2017	33	44	48	4	NA	34	23	0	178_3_11_14-Jun	0	0	0	0.363636363636364
178	3	13	NA	NA	14	6	14-Jun	2017	02/08/2017	05/09/2017	33	46	64	18	NA	35	23	0	178_3_13_14-Jun	0	0	0	0.347826086956522
178	1	11	NA	NA	22	9	22-Sep	2017	13/12/2017	NA	44	7	31	24	NA	75	23	0	178_1_11_22-Sep	0	0	0	0.714285714285714
178	1	13	NA	NA	22	9	22-Sep	2017	13/12/2017	NA	44	22	36	14	NA	76	23	0	178_1_13_22-Sep	0	0	0	0.590909090909091
178	3	13	NA	NA	22	9	22-Sep	2017	13/12/2017	NA	44	49	62	13	NA	77	23	0	178_3_13_22-Sep	0	0	0	0.795918367346939
178	4	11	NA	NA	22	9	22-Sep	2017	13/12/2017	NA	44	5	63	58	NA	78	23	0	178_4_11_22-Sep	0	0	0	0.4
178	4	13	NA	NA	22	9	22-Sep	2017	13/12/2017	NA	44	12	32	20	NA	79	23	0	178_4_13_22-Sep	0	0	0	0.5
178	5	11	NA	NA	22	9	22-Sep	2017	13/12/2017	NA	44	5	60	55	NA	80	23	0	178_5_11_22-Sep	0	0	0	0.6
178	1	11	NA	NA	14	6	14-Jun	2017	02/08/2017	05/09/2017	33	45	50	5	NA	31	24	0	178_1_11_14-Jun	0	0	0	0.577777777777778
178	1	13	NA	NA	14	6	14-Jun	2017	02/08/2017	05/09/2017	33	15	58	43	NA	32	24	0	178_1_13_14-Jun	0	0	0	0.266666666666667
178	2	11	NA	NA	14	6	14-Jun	2017	02/08/2017	05/09/2017	33	63	63	0	NA	33	24	0	178_2_11_14-Jun	0	0	0	0.714285714285714
178	3	11	NA	NA	14	6	14-Jun	2017	02/08/2017	05/09/2017	33	44	48	4	NA	34	24	0	178_3_11_14-Jun	0	0	0	0.363636363636364
178	3	13	NA	NA	14	6	14-Jun	2017	02/08/2017	05/09/2017	33	46	64	18	NA	35	24	0	178_3_13_14-Jun	0	0	0	0.347826086956522
178	1	11	NA	NA	22	9	22-Sep	2017	13/12/2017	NA	44	7	31	24	NA	75	24	0	178_1_11_22-Sep	0	0	0	0.714285714285714
178	1	13	NA	NA	22	9	22-Sep	2017	13/12/2017	NA	44	22	36	14	NA	76	24	0	178_1_13_22-Sep	0	0	0	0.590909090909091
178	3	13	NA	NA	22	9	22-Sep	2017	13/12/2017	NA	44	49	62	13	NA	77	24	0	178_3_13_22-Sep	0	0	0	0.795918367346939
178	4	11	NA	NA	22	9	22-Sep	2017	13/12/2017	NA	44	5	63	58	NA	78	24	0	178_4_11_22-Sep	0	0	0	0.4
178	4	13	NA	NA	22	9	22-Sep	2017	13/12/2017	NA	44	12	32	20	NA	79	24	0	178_4_13_22-Sep	0	0	0	0.5
178	5	11	NA	NA	22	9	22-Sep	2017	13/12/2017	NA	44	5	60	55	NA	80	24	0	178_5_11_22-Sep	0	0	0	0.6
178	1	11	NA	NA	14	6	14-Jun	2017	02/08/2017	05/09/2017	33	45	50	5	NA	31	25	0	178_1_11_14-Jun	0	0	0	0.577777777777778
178	1	13	NA	NA	14	6	14-Jun	2017	02/08/2017	05/09/2017	33	15	58	43	NA	32	25	0	178_1_13_14-Jun	0	0	0	0.266666666666667
178	2	11	NA	NA	14	6	14-Jun	2017	02/08/2017	05/09/2017	33	63	63	0	NA	33	25	0	178_2_11_14-Jun	0	0	0	0.714285714285714
178	3	11	NA	NA	14	6	14-Jun	2017	02/08/2017	05/09/2017	33	44	48	4	NA	34	25	0	178_3_11_14-Jun	0	0	0	0.363636363636364
178	3	13	NA	NA	14	6	14-Jun	2017	02/08/2017	05/09/2017	33	46	64	18	NA	35	25	0	178_3_13_14-Jun	0	0	0	0.347826086956522
178	1	11	NA	NA	22	9	22-Sep	2017	13/12/2017	NA	44	7	31	24	NA	75	25	0	178_1_11_22-Sep	0	0	0	0.714285714285714
178	1	13	NA	NA	22	9	22-Sep	2017	13/12/2017	NA	44	22	36	14	NA	76	25	0	178_1_13_22-Sep	0	0	0	0.590909090909091
178	3	13	NA	NA	22	9	22-Sep	2017	13/12/2017	NA	44	49	62	13	NA	77	25	0	178_3_13_22-Sep	0	0	0	0.795918367346939
178	4	11	NA	NA	22	9	22-Sep	2017	13/12/2017	NA	44	5	63	58	NA	78	25	0	178_4_11_22-Sep	0	0	0	0.4
178	4	13	NA	NA	22	9	22-Sep	2017	13/12/2017	NA	44	12	32	20	NA	79	25	0	178_4_13_22-Sep	0	0	0	0.5
178	5	11	NA	NA	22	9	22-Sep	2017	13/12/2017	NA	44	5	60	55	NA	80	25	0	178_5_11_22-Sep	0	0	0	0.6
178	1	11	NA	NA	14	6	14-Jun	2017	02/08/2017	05/09/2017	33	45	50	5	NA	31	26	0	178_1_11_14-Jun	0	0	0	0.577777777777778
178	1	13	NA	NA	14	6	14-Jun	2017	02/08/2017	05/09/2017	33	15	58	43	NA	32	26	0	178_1_13_14-Jun	0	0	0	0.266666666666667
178	2	11	NA	NA	14	6	14-Jun	2017	02/08/2017	05/09/2017	33	63	63	0	NA	33	26	0	178_2_11_14-Jun	0	0	0	0.714285714285714
178	3	11	NA	NA	14	6	14-Jun	2017	02/08/2017	05/09/2017	33	44	48	4	NA	34	26	0	178_3_11_14-Jun	0	0	0	0.363636363636364
178	3	13	NA	NA	14	6	14-Jun	2017	02/08/2017	05/09/2017	33	46	64	18	NA	35	26	0	178_3_13_14-Jun	0	0	0	0.347826086956522
178	1	11	NA	NA	22	9	22-Sep	2017	13/12/2017	NA	44	7	31	24	NA	75	26	0	178_1_11_22-Sep	0	0	0	0.714285714285714
178	1	13	NA	NA	22	9	22-Sep	2017	13/12/2017	NA	44	22	36	14	NA	76	26	0	178_1_13_22-Sep	0	0	0	0.590909090909091
178	3	13	NA	NA	22	9	22-Sep	2017	13/12/2017	NA	44	49	62	13	NA	77	26	0	178_3_13_22-Sep	0	0	0	0.795918367346939
178	4	11	NA	NA	22	9	22-Sep	2017	13/12/2017	NA	44	5	63	58	NA	78	26	0	178_4_11_22-Sep	0	0	0	0.4
178	4	13	NA	NA	22	9	22-Sep	2017	13/12/2017	NA	44	12	32	20	NA	79	26	0	178_4_13_22-Sep	0	0	0	0.5
178	5	11	NA	NA	22	9	22-Sep	2017	13/12/2017	NA	44	5	60	55	NA	80	26	0	178_5_11_22-Sep	0	0	0	0.6
178	1	11	NA	NA	14	6	14-Jun	2017	02/08/2017	05/09/2017	33	45	50	5	NA	31	27	0	178_1_11_14-Jun	0	0	0	0.577777777777778
178	1	13	NA	NA	14	6	14-Jun	2017	02/08/2017	05/09/2017	33	15	58	43	NA	32	27	0	178_1_13_14-Jun	0	0	0	0.266666666666667
178	2	11	NA	NA	14	6	14-Jun	2017	02/08/2017	05/09/2017	33	63	63	0	NA	33	27	0	178_2_11_14-Jun	0	0	0	0.714285714285714
178	3	11	NA	NA	14	6	14-Jun	2017	02/08/2017	05/09/2017	33	44	48	4	NA	34	27	0	178_3_11_14-Jun	0	0	0	0.363636363636364
178	3	13	NA	NA	14	6	14-Jun	2017	02/08/2017	05/09/2017	33	46	64	18	NA	35	27	0	178_3_13_14-Jun	0	0	0	0.347826086956522
178	1	11	NA	NA	22	9	22-Sep	2017	13/12/2017	NA	44	7	31	24	NA	75	27	0	178_1_11_22-Sep	0	0	0	0.714285714285714
178	1	13	NA	NA	22	9	22-Sep	2017	13/12/2017	NA	44	22	36	14	NA	76	27	0	178_1_13_22-Sep	0	0	0	0.590909090909091
178	3	13	NA	NA	22	9	22-Sep	2017	13/12/2017	NA	44	49	62	13	NA	77	27	0	178_3_13_22-Sep	0	0	0	0.795918367346939
178	4	11	NA	NA	22	9	22-Sep	2017	13/12/2017	NA	44	5	63	58	NA	78	27	0	178_4_11_22-Sep	0	0	0	0.4
178	4	13	NA	NA	22	9	22-Sep	2017	13/12/2017	NA	44	12	32	20	NA	79	27	0	178_4_13_22-Sep	0	0	0	0.5
178	5	11	NA	NA	22	9	22-Sep	2017	13/12/2017	NA	44	5	60	55	NA	80	27	0	178_5_11_22-Sep	0	0	0	0.6
178	1	11	NA	NA	14	6	14-Jun	2017	02/08/2017	05/09/2017	33	45	50	5	NA	31	28	0	178_1_11_14-Jun	0	0	0	0.577777777777778
178	1	13	NA	NA	14	6	14-Jun	2017	02/08/2017	05/09/2017	33	15	58	43	NA	32	28	0	178_1_13_14-Jun	0	0	0	0.266666666666667
178	2	11	NA	NA	14	6	14-Jun	2017	02/08/2017	05/09/2017	33	63	63	0	NA	33	28	0	178_2_11_14-Jun	0	0	0	0.714285714285714
178	3	11	NA	NA	14	6	14-Jun	2017	02/08/2017	05/09/2017	33	44	48	4	NA	34	28	0	178_3_11_14-Jun	0	0	0	0.363636363636364
178	3	13	NA	NA	14	6	14-Jun	2017	02/08/2017	05/09/2017	33	46	64	18	NA	35	28	0	178_3_13_14-Jun	0	0	0	0.347826086956522
178	1	11	NA	NA	22	9	22-Sep	2017	13/12/2017	NA	44	7	31	24	NA	75	28	0	178_1_11_22-Sep	0	0	0	0.714285714285714
178	1	13	NA	NA	22	9	22-Sep	2017	13/12/2017	NA	44	22	36	14	NA	76	28	0	178_1_13_22-Sep	0	0	0	0.590909090909091
178	3	13	NA	NA	22	9	22-Sep	2017	13/12/2017	NA	44	49	62	13	NA	77	28	0	178_3_13_22-Sep	0	0	0	0.795918367346939
178	4	11	NA	NA	22	9	22-Sep	2017	13/12/2017	NA	44	5	63	58	NA	78	28	0	178_4_11_22-Sep	0	0	0	0.4
178	4	13	NA	NA	22	9	22-Sep	2017	13/12/2017	NA	44	12	32	20	NA	79	28	0	178_4_13_22-Sep	0	0	0	0.5
178	5	11	NA	NA	22	9	22-Sep	2017	13/12/2017	NA	44	5	60	55	NA	80	28	0	178_5_11_22-Sep	0	0	0	0.6
178	1	11	NA	NA	14	6	14-Jun	2017	02/08/2017	05/09/2017	33	45	50	5	NA	31	29	0	178_1_11_14-Jun	0	0	0	0.577777777777778
178	1	13	NA	NA	14	6	14-Jun	2017	02/08/2017	05/09/2017	33	15	58	43	NA	32	29	0	178_1_13_14-Jun	0	0	0	0.266666666666667
178	2	11	NA	NA	14	6	14-Jun	2017	02/08/2017	05/09/2017	33	63	63	0	NA	33	29	0	178_2_11_14-Jun	0	0	0	0.714285714285714
178	3	11	NA	NA	14	6	14-Jun	2017	02/08/2017	05/09/2017	33	44	48	4	NA	34	29	0	178_3_11_14-Jun	0	0	0	0.363636363636364
178	3	13	NA	NA	14	6	14-Jun	2017	02/08/2017	05/09/2017	33	46	64	18	NA	35	29	0	178_3_13_14-Jun	0	0	0	0.347826086956522
178	1	11	NA	NA	22	9	22-Sep	2017	13/12/2017	NA	44	7	31	24	NA	75	29	0	178_1_11_22-Sep	0	0	0	0.714285714285714
178	1	13	NA	NA	22	9	22-Sep	2017	13/12/2017	NA	44	22	36	14	NA	76	29	0	178_1_13_22-Sep	0	0	0	0.590909090909091
178	3	13	NA	NA	22	9	22-Sep	2017	13/12/2017	NA	44	49	62	13	NA	77	29	0	178_3_13_22-Sep	0	0	0	0.795918367346939
178	4	11	NA	NA	22	9	22-Sep	2017	13/12/2017	NA	44	5	63	58	NA	78	29	0	178_4_11_22-Sep	0	0	0	0.4
178	4	13	NA	NA	22	9	22-Sep	2017	13/12/2017	NA	44	12	32	20	NA	79	29	0	178_4_13_22-Sep	0	0	0	0.5
178	5	11	NA	NA	22	9	22-Sep	2017	13/12/2017	NA	44	5	60	55	NA	80	29	0	178_5_11_22-Sep	0	0	0	0.6
178	1	11	NA	NA	14	6	14-Jun	2017	02/08/2017	05/09/2017	33	45	50	5	NA	31	30	0	178_1_11_14-Jun	0	0	0	0.577777777777778
178	1	13	NA	NA	14	6	14-Jun	2017	02/08/2017	05/09/2017	33	15	58	43	NA	32	30	0	178_1_13_14-Jun	0	0	0	0.266666666666667
178	2	11	NA	NA	14	6	14-Jun	2017	02/08/2017	05/09/2017	33	63	63	0	NA	33	30	0	178_2_11_14-Jun	0	0	0	0.714285714285714
178	3	11	NA	NA	14	6	14-Jun	2017	02/08/2017	05/09/2017	33	44	48	4	NA	34	30	0	178_3_11_14-Jun	0	0	0	0.363636363636364
178	3	13	NA	NA	14	6	14-Jun	2017	02/08/2017	05/09/2017	33	46	64	18	NA	35	30	0	178_3_13_14-Jun	0	0	0	0.347826086956522
178	1	11	NA	NA	22	9	22-Sep	2017	13/12/2017	NA	44	7	31	24	NA	75	30	0	178_1_11_22-Sep	0	0	0	0.714285714285714
178	1	13	NA	NA	22	9	22-Sep	2017	13/12/2017	NA	44	22	36	14	NA	76	30	0	178_1_13_22-Sep	0	0	0	0.590909090909091
178	3	13	NA	NA	22	9	22-Sep	2017	13/12/2017	NA	44	49	62	13	NA	77	30	0	178_3_13_22-Sep	0	0	0	0.795918367346939
178	4	11	NA	NA	22	9	22-Sep	2017	13/12/2017	NA	44	5	63	58	NA	78	30	0	178_4_11_22-Sep	0	0	0	0.4
178	4	13	NA	NA	22	9	22-Sep	2017	13/12/2017	NA	44	12	32	20	NA	79	30	0	178_4_13_22-Sep	0	0	0	0.5
178	5	11	NA	NA	22	9	22-Sep	2017	13/12/2017	NA	44	5	60	55	NA	80	30	0	178_5_11_22-Sep	0	0	0	0.6
178	1	11	NA	NA	14	6	14-Jun	2017	02/08/2017	05/09/2017	33	45	50	5	NA	31	31	0	178_1_11_14-Jun	0	0	0	0.577777777777778
178	1	13	NA	NA	14	6	14-Jun	2017	02/08/2017	05/09/2017	33	15	58	43	NA	32	31	0	178_1_13_14-Jun	0	0	0	0.266666666666667
178	2	11	NA	NA	14	6	14-Jun	2017	02/08/2017	05/09/2017	33	63	63	0	NA	33	31	0	178_2_11_14-Jun	0	0	0	0.714285714285714
178	3	11	NA	NA	14	6	14-Jun	2017	02/08/2017	05/09/2017	33	44	48	4	NA	34	31	0	178_3_11_14-Jun	0	0	0	0.363636363636364
178	3	13	NA	NA	14	6	14-Jun	2017	02/08/2017	05/09/2017	33	46	64	18	NA	35	31	0	178_3_13_14-Jun	0	0	0	0.347826086956522
178	1	11	NA	NA	22	9	22-Sep	2017	13/12/2017	NA	44	7	31	24	NA	75	31	0	178_1_11_22-Sep	0	0	0	0.714285714285714
178	1	13	NA	NA	22	9	22-Sep	2017	13/12/2017	NA	44	22	36	14	NA	76	31	0	178_1_13_22-Sep	0	0	0	0.590909090909091
178	3	13	NA	NA	22	9	22-Sep	2017	13/12/2017	NA	44	49	62	13	NA	77	31	0	178_3_13_22-Sep	0	0	0	0.795918367346939
178	4	11	NA	NA	22	9	22-Sep	2017	13/12/2017	NA	44	5	63	58	NA	78	31	0	178_4_11_22-Sep	0	0	0	0.4
178	4	13	NA	NA	22	9	22-Sep	2017	13/12/2017	NA	44	12	32	20	NA	79	31	0	178_4_13_22-Sep	0	0	0	0.5
178	5	11	NA	NA	22	9	22-Sep	2017	13/12/2017	NA	44	5	60	55	NA	80	31	0	178_5_11_22-Sep	0	0	0	0.6
178	1	11	NA	NA	14	6	14-Jun	2017	02/08/2017	05/09/2017	33	45	50	5	NA	31	32	0	178_1_11_14-Jun	0	0	0	0.577777777777778
178	1	13	NA	NA	14	6	14-Jun	2017	02/08/2017	05/09/2017	33	15	58	43	NA	32	32	0	178_1_13_14-Jun	0	0	0	0.266666666666667
178	2	11	NA	NA	14	6	14-Jun	2017	02/08/2017	05/09/2017	33	63	63	0	NA	33	32	0	178_2_11_14-Jun	0	0	0	0.714285714285714
178	3	11	NA	NA	14	6	14-Jun	2017	02/08/2017	05/09/2017	33	44	48	4	NA	34	32	0	178_3_11_14-Jun	0	0	0	0.363636363636364
178	3	13	NA	NA	14	6	14-Jun	2017	02/08/2017	05/09/2017	33	46	64	18	NA	35	32	0	178_3_13_14-Jun	0	0	0	0.347826086956522
178	1	11	NA	NA	22	9	22-Sep	2017	13/12/2017	NA	44	7	31	24	NA	75	32	0	178_1_11_22-Sep	0	0	0	0.714285714285714
178	1	13	NA	NA	22	9	22-Sep	2017	13/12/2017	NA	44	22	36	14	NA	76	32	0	178_1_13_22-Sep	0	0	0	0.590909090909091
178	3	13	NA	NA	22	9	22-Sep	2017	13/12/2017	NA	44	49	62	13	NA	77	32	0	178_3_13_22-Sep	0	0	0	0.795918367346939
178	4	11	NA	NA	22	9	22-Sep	2017	13/12/2017	NA	44	5	63	58	NA	78	32	0	178_4_11_22-Sep	0	0	0	0.4
178	4	13	NA	NA	22	9	22-Sep	2017	13/12/2017	NA	44	12	32	20	NA	79	32	0	178_4_13_22-Sep	0	0	0	0.5
178	5	11	NA	NA	22	9	22-Sep	2017	13/12/2017	NA	44	5	60	55	NA	80	32	0	178_5_11_22-Sep	0	0	0	0.6
178	1	11	NA	NA	14	6	14-Jun	2017	02/08/2017	05/09/2017	33	45	50	5	NA	31	33	0	178_1_11_14-Jun	0	0	0	0.577777777777778
178	1	13	NA	NA	14	6	14-Jun	2017	02/08/2017	05/09/2017	33	15	58	43	NA	32	33	0	178_1_13_14-Jun	0	0	0	0.266666666666667
178	2	11	NA	NA	14	6	14-Jun	2017	02/08/2017	05/09/2017	33	63	63	0	NA	33	33	0	178_2_11_14-Jun	0	0	0	0.714285714285714
178	3	11	NA	NA	14	6	14-Jun	2017	02/08/2017	05/09/2017	33	44	48	4	NA	34	33	0	178_3_11_14-Jun	0	0	0	0.363636363636364
178	3	13	NA	NA	14	6	14-Jun	2017	02/08/2017	05/09/2017	33	46	64	18	NA	35	33	0	178_3_13_14-Jun	0	0	0	0.347826086956522
178	1	11	NA	NA	22	9	22-Sep	2017	13/12/2017	NA	44	7	31	24	NA	75	33	0	178_1_11_22-Sep	0	0	0	0.714285714285714
178	1	13	NA	NA	22	9	22-Sep	2017	13/12/2017	NA	44	22	36	14	NA	76	33	0	178_1_13_22-Sep	0	0	0	0.590909090909091
178	3	13	NA	NA	22	9	22-Sep	2017	13/12/2017	NA	44	49	62	13	NA	77	33	0	178_3_13_22-Sep	0	0	0	0.795918367346939
178	4	11	NA	NA	22	9	22-Sep	2017	13/12/2017	NA	44	5	63	58	NA	78	33	0	178_4_11_22-Sep	0	0	0	0.4
178	4	13	NA	NA	22	9	22-Sep	2017	13/12/2017	NA	44	12	32	20	NA	79	33	0	178_4_13_22-Sep	0	0	0	0.5
178	5	11	NA	NA	22	9	22-Sep	2017	13/12/2017	NA	44	5	60	55	NA	80	33	0	178_5_11_22-Sep	0	0	0	0.6
178	1	11	NA	NA	14	6	14-Jun	2017	02/08/2017	05/09/2017	33	45	50	5	NA	31	34	0	178_1_11_14-Jun	0	0	0	0.577777777777778
178	1	13	NA	NA	14	6	14-Jun	2017	02/08/2017	05/09/2017	33	15	58	43	NA	32	34	0	178_1_13_14-Jun	0	0	0	0.266666666666667
178	2	11	NA	NA	14	6	14-Jun	2017	02/08/2017	05/09/2017	33	63	63	0	NA	33	34	0	178_2_11_14-Jun	0	0	0	0.714285714285714
178	3	11	NA	NA	14	6	14-Jun	2017	02/08/2017	05/09/2017	33	44	48	4	NA	34	34	0	178_3_11_14-Jun	0	0	0	0.363636363636364
178	3	13	NA	NA	14	6	14-Jun	2017	02/08/2017	05/09/2017	33	46	64	18	NA	35	34	0	178_3_13_14-Jun	0	0	0	0.347826086956522
178	1	11	NA	NA	22	9	22-Sep	2017	13/12/2017	NA	44	7	31	24	NA	75	34	0	178_1_11_22-Sep	0	0	0	0.714285714285714
178	1	13	NA	NA	22	9	22-Sep	2017	13/12/2017	NA	44	22	36	14	NA	76	34	0	178_1_13_22-Sep	0	0	0	0.590909090909091
178	3	13	NA	NA	22	9	22-Sep	2017	13/12/2017	NA	44	49	62	13	NA	77	34	0	178_3_13_22-Sep	0	0	0	0.795918367346939
178	4	11	NA	NA	22	9	22-Sep	2017	13/12/2017	NA	44	5	63	58	NA	78	34	0	178_4_11_22-Sep	0	0	0	0.4
178	4	13	NA	NA	22	9	22-Sep	2017	13/12/2017	NA	44	12	32	20	NA	79	34	0	178_4_13_22-Sep	0	0	0	0.5
178	5	11	NA	NA	22	9	22-Sep	2017	13/12/2017	NA	44	5	60	55	NA	80	34	0	178_5_11_22-Sep	0	0	0	0.6
178	1	11	NA	NA	14	6	14-Jun	2017	02/08/2017	05/09/2017	33	45	50	5	NA	31	35	0	178_1_11_14-Jun	0	0	0	0.577777777777778
178	1	13	NA	NA	14	6	14-Jun	2017	02/08/2017	05/09/2017	33	15	58	43	NA	32	35	0	178_1_13_14-Jun	0	0	0	0.266666666666667
178	2	11	NA	NA	14	6	14-Jun	2017	02/08/2017	05/09/2017	33	63	63	0	NA	33	35	0	178_2_11_14-Jun	0	0	0	0.714285714285714
178	3	11	NA	NA	14	6	14-Jun	2017	02/08/2017	05/09/2017	33	44	48	4	NA	34	35	0	178_3_11_14-Jun	0	0	0	0.363636363636364
178	3	13	NA	NA	14	6	14-Jun	2017	02/08/2017	05/09/2017	33	46	64	18	NA	35	35	0	178_3_13_14-Jun	0	0	0	0.347826086956522
178	1	11	NA	NA	22	9	22-Sep	2017	13/12/2017	NA	44	7	31	24	NA	75	35	0	178_1_11_22-Sep	0	0	0	0.714285714285714
178	1	13	NA	NA	22	9	22-Sep	2017	13/12/2017	NA	44	22	36	14	NA	76	35	0	178_1_13_22-Sep	0	0	0	0.590909090909091
178	3	13	NA	NA	22	9	22-Sep	2017	13/12/2017	NA	44	49	62	13	NA	77	35	0	178_3_13_22-Sep	0	0	0	0.795918367346939
178	4	11	NA	NA	22	9	22-Sep	2017	13/12/2017	NA	44	5	63	58	NA	78	35	0	178_4_11_22-Sep	0	0	0	0.4
178	4	13	NA	NA	22	9	22-Sep	2017	13/12/2017	NA	44	12	32	20	NA	79	35	0	178_4_13_22-Sep	0	0	0	0.5
178	5	11	NA	NA	22	9	22-Sep	2017	13/12/2017	NA	44	5	60	55	NA	80	35	0	178_5_11_22-Sep	0	0	0	0.6
178	1	11	NA	NA	14	6	14-Jun	2017	02/08/2017	05/09/2017	33	45	50	5	NA	31	36	0	178_1_11_14-Jun	0	0	0	0.577777777777778
178	1	13	NA	NA	14	6	14-Jun	2017	02/08/2017	05/09/2017	33	15	58	43	NA	32	36	0	178_1_13_14-Jun	0	0	0	0.266666666666667
178	2	11	NA	NA	14	6	14-Jun	2017	02/08/2017	05/09/2017	33	63	63	0	NA	33	36	0	178_2_11_14-Jun	0	0	0	0.714285714285714
178	3	11	NA	NA	14	6	14-Jun	2017	02/08/2017	05/09/2017	33	44	48	4	NA	34	36	0	178_3_11_14-Jun	0	0	0	0.363636363636364
178	3	13	NA	NA	14	6	14-Jun	2017	02/08/2017	05/09/2017	33	46	64	18	NA	35	36	0	178_3_13_14-Jun	0	0	0	0.347826086956522
178	1	11	NA	NA	22	9	22-Sep	2017	13/12/2017	NA	44	7	31	24	NA	75	36	0	178_1_11_22-Sep	0	0	0	0.714285714285714
178	1	13	NA	NA	22	9	22-Sep	2017	13/12/2017	NA	44	22	36	14	NA	76	36	0	178_1_13_22-Sep	0	0	0	0.590909090909091
178	3	13	NA	NA	22	9	22-Sep	2017	13/12/2017	NA	44	49	62	13	NA	77	36	0	178_3_13_22-Sep	0	0	0	0.795918367346939
178	4	11	NA	NA	22	9	22-Sep	2017	13/12/2017	NA	44	5	63	58	NA	78	36	0	178_4_11_22-Sep	0	0	0	0.4
178	4	13	NA	NA	22	9	22-Sep	2017	13/12/2017	NA	44	12	32	20	NA	79	36	0	178_4_13_22-Sep	0	0	0	0.5
178	5	11	NA	NA	22	9	22-Sep	2017	13/12/2017	NA	44	5	60	55	NA	80	36	0	178_5_11_22-Sep	0	0	0	0.6
178	1	11	NA	NA	14	6	14-Jun	2017	02/08/2017	05/09/2017	33	45	50	5	NA	31	37	1	178_1_11_14-Jun	2	2.22222222222222	0.0222222222222222	0.6
178	1	13	NA	NA	14	6	14-Jun	2017	02/08/2017	05/09/2017	33	15	58	43	NA	32	37	0	178_1_13_14-Jun	0	0	0	0.266666666666667
178	2	11	NA	NA	14	6	14-Jun	2017	02/08/2017	05/09/2017	33	63	63	0	NA	33	37	0	178_2_11_14-Jun	0	0	0	0.714285714285714
178	3	11	NA	NA	14	6	14-Jun	2017	02/08/2017	05/09/2017	33	44	48	4	NA	34	37	2	178_3_11_14-Jun	4.16666666666667	4.54545454545455	0.0454545454545455	0.409090909090909
178	3	13	NA	NA	14	6	14-Jun	2017	02/08/2017	05/09/2017	33	46	64	18	NA	35	37	0	178_3_13_14-Jun	0	0	0	0.347826086956522
178	1	11	NA	NA	22	9	22-Sep	2017	13/12/2017	NA	44	7	31	24	NA	75	37	0	178_1_11_22-Sep	0	0	0	0.714285714285714
178	1	13	NA	NA	22	9	22-Sep	2017	13/12/2017	NA	44	22	36	14	NA	76	37	0	178_1_13_22-Sep	0	0	0	0.590909090909091
178	3	13	NA	NA	22	9	22-Sep	2017	13/12/2017	NA	44	49	62	13	NA	77	37	0	178_3_13_22-Sep	0	0	0	0.795918367346939
178	4	11	NA	NA	22	9	22-Sep	2017	13/12/2017	NA	44	5	63	58	NA	78	37	0	178_4_11_22-Sep	0	0	0	0.4
178	4	13	NA	NA	22	9	22-Sep	2017	13/12/2017	NA	44	12	32	20	NA	79	37	0	178_4_13_22-Sep	0	0	0	0.5
178	5	11	NA	NA	22	9	22-Sep	2017	13/12/2017	NA	44	5	60	55	NA	80	37	0	178_5_11_22-Sep	0	0	0	0.6
178	1	11	NA	NA	14	6	14-Jun	2017	02/08/2017	05/09/2017	33	45	50	5	NA	31	38	0	178_1_11_14-Jun	0	0	0	0.6
178	1	13	NA	NA	14	6	14-Jun	2017	02/08/2017	05/09/2017	33	15	58	43	NA	32	38	0	178_1_13_14-Jun	0	0	0	0.266666666666667
178	2	11	NA	NA	14	6	14-Jun	2017	02/08/2017	05/09/2017	33	63	63	0	NA	33	38	0	178_2_11_14-Jun	0	0	0	0.714285714285714
178	3	11	NA	NA	14	6	14-Jun	2017	02/08/2017	05/09/2017	33	44	48	4	NA	34	38	0	178_3_11_14-Jun	0	0	0	0.409090909090909
178	3	13	NA	NA	14	6	14-Jun	2017	02/08/2017	05/09/2017	33	46	64	18	NA	35	38	0	178_3_13_14-Jun	0	0	0	0.347826086956522
178	1	11	NA	NA	22	9	22-Sep	2017	13/12/2017	NA	44	7	31	24	NA	75	38	0	178_1_11_22-Sep	0	0	0	0.714285714285714
178	1	13	NA	NA	22	9	22-Sep	2017	13/12/2017	NA	44	22	36	14	NA	76	38	0	178_1_13_22-Sep	0	0	0	0.590909090909091
178	3	13	NA	NA	22	9	22-Sep	2017	13/12/2017	NA	44	49	62	13	NA	77	38	0	178_3_13_22-Sep	0	0	0	0.795918367346939
178	4	11	NA	NA	22	9	22-Sep	2017	13/12/2017	NA	44	5	63	58	NA	78	38	0	178_4_11_22-Sep	0	0	0	0.4
178	4	13	NA	NA	22	9	22-Sep	2017	13/12/2017	NA	44	12	32	20	NA	79	38	0	178_4_13_22-Sep	0	0	0	0.5
178	5	11	NA	NA	22	9	22-Sep	2017	13/12/2017	NA	44	5	60	55	NA	80	38	0	178_5_11_22-Sep	0	0	0	0.6
178	1	11	NA	NA	14	6	14-Jun	2017	02/08/2017	05/09/2017	33	45	50	5	NA	31	39	0	178_1_11_14-Jun	0	0	0	0.6
178	1	13	NA	NA	14	6	14-Jun	2017	02/08/2017	05/09/2017	33	15	58	43	NA	32	39	0	178_1_13_14-Jun	0	0	0	0.266666666666667
178	2	11	NA	NA	14	6	14-Jun	2017	02/08/2017	05/09/2017	33	63	63	0	NA	33	39	0	178_2_11_14-Jun	0	0	0	0.714285714285714
178	3	11	NA	NA	14	6	14-Jun	2017	02/08/2017	05/09/2017	33	44	48	4	NA	34	39	0	178_3_11_14-Jun	0	0	0	0.409090909090909
178	3	13	NA	NA	14	6	14-Jun	2017	02/08/2017	05/09/2017	33	46	64	18	NA	35	39	0	178_3_13_14-Jun	0	0	0	0.347826086956522
178	1	11	NA	NA	22	9	22-Sep	2017	13/12/2017	NA	44	7	31	24	NA	75	39	0	178_1_11_22-Sep	0	0	0	0.714285714285714
178	1	13	NA	NA	22	9	22-Sep	2017	13/12/2017	NA	44	22	36	14	NA	76	39	0	178_1_13_22-Sep	0	0	0	0.590909090909091
178	3	13	NA	NA	22	9	22-Sep	2017	13/12/2017	NA	44	49	62	13	NA	77	39	0	178_3_13_22-Sep	0	0	0	0.795918367346939
178	4	11	NA	NA	22	9	22-Sep	2017	13/12/2017	NA	44	5	63	58	NA	78	39	0	178_4_11_22-Sep	0	0	0	0.4
178	4	13	NA	NA	22	9	22-Sep	2017	13/12/2017	NA	44	12	32	20	NA	79	39	0	178_4_13_22-Sep	0	0	0	0.5
178	5	11	NA	NA	22	9	22-Sep	2017	13/12/2017	NA	44	5	60	55	NA	80	39	0	178_5_11_22-Sep	0	0	0	0.6
178	1	11	NA	NA	14	6	14-Jun	2017	02/08/2017	05/09/2017	33	45	50	5	NA	31	40	0	178_1_11_14-Jun	0	0	0	0.6
178	1	13	NA	NA	14	6	14-Jun	2017	02/08/2017	05/09/2017	33	15	58	43	NA	32	40	0	178_1_13_14-Jun	0	0	0	0.266666666666667
178	2	11	NA	NA	14	6	14-Jun	2017	02/08/2017	05/09/2017	33	63	63	0	NA	33	40	0	178_2_11_14-Jun	0	0	0	0.714285714285714
178	3	11	NA	NA	14	6	14-Jun	2017	02/08/2017	05/09/2017	33	44	48	4	NA	34	40	0	178_3_11_14-Jun	0	0	0	0.409090909090909
178	3	13	NA	NA	14	6	14-Jun	2017	02/08/2017	05/09/2017	33	46	64	18	NA	35	40	0	178_3_13_14-Jun	0	0	0	0.347826086956522
178	1	11	NA	NA	22	9	22-Sep	2017	13/12/2017	NA	44	7	31	24	NA	75	40	0	178_1_11_22-Sep	0	0	0	0.714285714285714
178	1	13	NA	NA	22	9	22-Sep	2017	13/12/2017	NA	44	22	36	14	NA	76	40	0	178_1_13_22-Sep	0	0	0	0.590909090909091
178	3	13	NA	NA	22	9	22-Sep	2017	13/12/2017	NA	44	49	62	13	NA	77	40	0	178_3_13_22-Sep	0	0	0	0.795918367346939
178	4	11	NA	NA	22	9	22-Sep	2017	13/12/2017	NA	44	5	63	58	NA	78	40	0	178_4_11_22-Sep	0	0	0	0.4
178	4	13	NA	NA	22	9	22-Sep	2017	13/12/2017	NA	44	12	32	20	NA	79	40	0	178_4_13_22-Sep	0	0	0	0.5
178	5	11	NA	NA	22	9	22-Sep	2017	13/12/2017	NA	44	5	60	55	NA	80	40	0	178_5_11_22-Sep	0	0	0	0.6
178	1	11	NA	NA	14	6	14-Jun	2017	02/08/2017	05/09/2017	33	45	50	5	NA	31	41	0	178_1_11_14-Jun	0	0	0	0.6
178	1	13	NA	NA	14	6	14-Jun	2017	02/08/2017	05/09/2017	33	15	58	43	NA	32	41	0	178_1_13_14-Jun	0	0	0	0.266666666666667
178	2	11	NA	NA	14	6	14-Jun	2017	02/08/2017	05/09/2017	33	63	63	0	NA	33	41	0	178_2_11_14-Jun	0	0	0	0.714285714285714
178	3	11	NA	NA	14	6	14-Jun	2017	02/08/2017	05/09/2017	33	44	48	4	NA	34	41	1	178_3_11_14-Jun	2.08333333333333	2.27272727272727	0.0227272727272727	0.431818181818182
178	3	13	NA	NA	14	6	14-Jun	2017	02/08/2017	05/09/2017	33	46	64	18	NA	35	41	1	178_3_13_14-Jun	1.5625	2.17391304347826	0.0217391304347826	0.369565217391304
178	1	11	NA	NA	22	9	22-Sep	2017	13/12/2017	NA	44	7	31	24	NA	75	41	0	178_1_11_22-Sep	0	0	0	0.714285714285714
178	1	13	NA	NA	22	9	22-Sep	2017	13/12/2017	NA	44	22	36	14	NA	76	41	0	178_1_13_22-Sep	0	0	0	0.590909090909091
178	3	13	NA	NA	22	9	22-Sep	2017	13/12/2017	NA	44	49	62	13	NA	77	41	0	178_3_13_22-Sep	0	0	0	0.795918367346939
178	4	11	NA	NA	22	9	22-Sep	2017	13/12/2017	NA	44	5	63	58	NA	78	41	0	178_4_11_22-Sep	0	0	0	0.4
178	4	13	NA	NA	22	9	22-Sep	2017	13/12/2017	NA	44	12	32	20	NA	79	41	0	178_4_13_22-Sep	0	0	0	0.5
178	5	11	NA	NA	22	9	22-Sep	2017	13/12/2017	NA	44	5	60	55	NA	80	41	0	178_5_11_22-Sep	0	0	0	0.6
178	1	11	NA	NA	14	6	14-Jun	2017	02/08/2017	05/09/2017	33	45	50	5	NA	31	42	0	178_1_11_14-Jun	0	0	0	0.6
178	1	13	NA	NA	14	6	14-Jun	2017	02/08/2017	05/09/2017	33	15	58	43	NA	32	42	0	178_1_13_14-Jun	0	0	0	0.266666666666667
178	2	11	NA	NA	14	6	14-Jun	2017	02/08/2017	05/09/2017	33	63	63	0	NA	33	42	0	178_2_11_14-Jun	0	0	0	0.714285714285714
178	3	11	NA	NA	14	6	14-Jun	2017	02/08/2017	05/09/2017	33	44	48	4	NA	34	42	0	178_3_11_14-Jun	0	0	0	0.431818181818182
178	3	13	NA	NA	14	6	14-Jun	2017	02/08/2017	05/09/2017	33	46	64	18	NA	35	42	1	178_3_13_14-Jun	1.5625	2.17391304347826	0.0217391304347826	0.391304347826087
178	1	11	NA	NA	22	9	22-Sep	2017	13/12/2017	NA	44	7	31	24	NA	75	42	0	178_1_11_22-Sep	0	0	0	0.714285714285714
178	1	13	NA	NA	22	9	22-Sep	2017	13/12/2017	NA	44	22	36	14	NA	76	42	0	178_1_13_22-Sep	0	0	0	0.590909090909091
178	3	13	NA	NA	22	9	22-Sep	2017	13/12/2017	NA	44	49	62	13	NA	77	42	0	178_3_13_22-Sep	0	0	0	0.795918367346939
178	4	11	NA	NA	22	9	22-Sep	2017	13/12/2017	NA	44	5	63	58	NA	78	42	0	178_4_11_22-Sep	0	0	0	0.4
178	4	13	NA	NA	22	9	22-Sep	2017	13/12/2017	NA	44	12	32	20	NA	79	42	0	178_4_13_22-Sep	0	0	0	0.5
178	5	11	NA	NA	22	9	22-Sep	2017	13/12/2017	NA	44	5	60	55	NA	80	42	0	178_5_11_22-Sep	0	0	0	0.6
178	1	11	NA	NA	14	6	14-Jun	2017	02/08/2017	05/09/2017	33	45	50	5	NA	31	43	0	178_1_11_14-Jun	0	0	0	0.6
178	1	13	NA	NA	14	6	14-Jun	2017	02/08/2017	05/09/2017	33	15	58	43	NA	32	43	0	178_1_13_14-Jun	0	0	0	0.266666666666667
178	2	11	NA	NA	14	6	14-Jun	2017	02/08/2017	05/09/2017	33	63	63	0	NA	33	43	1	178_2_11_14-Jun	1.58730158730159	1.58730158730159	0.0158730158730159	0.73015873015873
178	3	11	NA	NA	14	6	14-Jun	2017	02/08/2017	05/09/2017	33	44	48	4	NA	34	43	0	178_3_11_14-Jun	0	0	0	0.431818181818182
178	3	13	NA	NA	14	6	14-Jun	2017	02/08/2017	05/09/2017	33	46	64	18	NA	35	43	0	178_3_13_14-Jun	0	0	0	0.391304347826087
178	1	11	NA	NA	22	9	22-Sep	2017	13/12/2017	NA	44	7	31	24	NA	75	43	0	178_1_11_22-Sep	0	0	0	0.714285714285714
178	1	13	NA	NA	22	9	22-Sep	2017	13/12/2017	NA	44	22	36	14	NA	76	43	0	178_1_13_22-Sep	0	0	0	0.590909090909091
178	3	13	NA	NA	22	9	22-Sep	2017	13/12/2017	NA	44	49	62	13	NA	77	43	0	178_3_13_22-Sep	0	0	0	0.795918367346939
178	4	11	NA	NA	22	9	22-Sep	2017	13/12/2017	NA	44	5	63	58	NA	78	43	0	178_4_11_22-Sep	0	0	0	0.4
178	4	13	NA	NA	22	9	22-Sep	2017	13/12/2017	NA	44	12	32	20	NA	79	43	0	178_4_13_22-Sep	0	0	0	0.5
178	5	11	NA	NA	22	9	22-Sep	2017	13/12/2017	NA	44	5	60	55	NA	80	43	0	178_5_11_22-Sep	0	0	0	0.6
178	1	11	NA	NA	14	6	14-Jun	2017	02/08/2017	05/09/2017	33	45	50	5	NA	31	44	1	178_1_11_14-Jun	2	2.22222222222222	0.0222222222222222	0.622222222222222
178	1	13	NA	NA	14	6	14-Jun	2017	02/08/2017	05/09/2017	33	15	58	43	NA	32	44	0	178_1_13_14-Jun	0	0	0	0.266666666666667
178	2	11	NA	NA	14	6	14-Jun	2017	02/08/2017	05/09/2017	33	63	63	0	NA	33	44	0	178_2_11_14-Jun	0	0	0	0.73015873015873
178	3	11	NA	NA	14	6	14-Jun	2017	02/08/2017	05/09/2017	33	44	48	4	NA	34	44	0	178_3_11_14-Jun	0	0	0	0.431818181818182
178	3	13	NA	NA	14	6	14-Jun	2017	02/08/2017	05/09/2017	33	46	64	18	NA	35	44	1	178_3_13_14-Jun	1.5625	2.17391304347826	0.0217391304347826	0.41304347826087
178	1	11	NA	NA	22	9	22-Sep	2017	13/12/2017	NA	44	7	31	24	NA	75	44	0	178_1_11_22-Sep	0	0	0	0.714285714285714
178	1	13	NA	NA	22	9	22-Sep	2017	13/12/2017	NA	44	22	36	14	NA	76	44	0	178_1_13_22-Sep	0	0	0	0.590909090909091
178	3	13	NA	NA	22	9	22-Sep	2017	13/12/2017	NA	44	49	62	13	NA	77	44	0	178_3_13_22-Sep	0	0	0	0.795918367346939
178	4	11	NA	NA	22	9	22-Sep	2017	13/12/2017	NA	44	5	63	58	NA	78	44	0	178_4_11_22-Sep	0	0	0	0.4
178	4	13	NA	NA	22	9	22-Sep	2017	13/12/2017	NA	44	12	32	20	NA	79	44	0	178_4_13_22-Sep	0	0	0	0.5
178	5	11	NA	NA	22	9	22-Sep	2017	13/12/2017	NA	44	5	60	55	NA	80	44	0	178_5_11_22-Sep	0	0	0	0.6
178	1	11	NA	NA	14	6	14-Jun	2017	02/08/2017	05/09/2017	33	45	50	5	NA	31	45	0	178_1_11_14-Jun	0	0	0	0.622222222222222
178	1	13	NA	NA	14	6	14-Jun	2017	02/08/2017	05/09/2017	33	15	58	43	NA	32	45	0	178_1_13_14-Jun	0	0	0	0.266666666666667
178	2	11	NA	NA	14	6	14-Jun	2017	02/08/2017	05/09/2017	33	63	63	0	NA	33	45	0	178_2_11_14-Jun	0	0	0	0.73015873015873
178	3	11	NA	NA	14	6	14-Jun	2017	02/08/2017	05/09/2017	33	44	48	4	NA	34	45	0	178_3_11_14-Jun	0	0	0	0.431818181818182
178	3	13	NA	NA	14	6	14-Jun	2017	02/08/2017	05/09/2017	33	46	64	18	NA	35	45	0	178_3_13_14-Jun	0	0	0	0.41304347826087
178	1	11	NA	NA	22	9	22-Sep	2017	13/12/2017	NA	44	7	31	24	NA	75	45	0	178_1_11_22-Sep	0	0	0	0.714285714285714
178	1	13	NA	NA	22	9	22-Sep	2017	13/12/2017	NA	44	22	36	14	NA	76	45	0	178_1_13_22-Sep	0	0	0	0.590909090909091
178	3	13	NA	NA	22	9	22-Sep	2017	13/12/2017	NA	44	49	62	13	NA	77	45	0	178_3_13_22-Sep	0	0	0	0.795918367346939
178	4	11	NA	NA	22	9	22-Sep	2017	13/12/2017	NA	44	5	63	58	NA	78	45	0	178_4_11_22-Sep	0	0	0	0.4
178	4	13	NA	NA	22	9	22-Sep	2017	13/12/2017	NA	44	12	32	20	NA	79	45	0	178_4_13_22-Sep	0	0	0	0.5
178	5	11	NA	NA	22	9	22-Sep	2017	13/12/2017	NA	44	5	60	55	NA	80	45	0	178_5_11_22-Sep	0	0	0	0.6
178	1	11	NA	NA	14	6	14-Jun	2017	02/08/2017	05/09/2017	33	45	50	5	NA	31	46	0	178_1_11_14-Jun	0	0	0	0.622222222222222
178	1	13	NA	NA	14	6	14-Jun	2017	02/08/2017	05/09/2017	33	15	58	43	NA	32	46	0	178_1_13_14-Jun	0	0	0	0.266666666666667
178	2	11	NA	NA	14	6	14-Jun	2017	02/08/2017	05/09/2017	33	63	63	0	NA	33	46	0	178_2_11_14-Jun	0	0	0	0.73015873015873
178	3	11	NA	NA	14	6	14-Jun	2017	02/08/2017	05/09/2017	33	44	48	4	NA	34	46	0	178_3_11_14-Jun	0	0	0	0.431818181818182
178	3	13	NA	NA	14	6	14-Jun	2017	02/08/2017	05/09/2017	33	46	64	18	NA	35	46	0	178_3_13_14-Jun	0	0	0	0.41304347826087
178	1	11	NA	NA	22	9	22-Sep	2017	13/12/2017	NA	44	7	31	24	NA	75	46	0	178_1_11_22-Sep	0	0	0	0.714285714285714
178	1	13	NA	NA	22	9	22-Sep	2017	13/12/2017	NA	44	22	36	14	NA	76	46	0	178_1_13_22-Sep	0	0	0	0.590909090909091
178	3	13	NA	NA	22	9	22-Sep	2017	13/12/2017	NA	44	49	62	13	NA	77	46	0	178_3_13_22-Sep	0	0	0	0.795918367346939
178	4	11	NA	NA	22	9	22-Sep	2017	13/12/2017	NA	44	5	63	58	NA	78	46	0	178_4_11_22-Sep	0	0	0	0.4
178	4	13	NA	NA	22	9	22-Sep	2017	13/12/2017	NA	44	12	32	20	NA	79	46	0	178_4_13_22-Sep	0	0	0	0.5
178	5	11	NA	NA	22	9	22-Sep	2017	13/12/2017	NA	44	5	60	55	NA	80	46	0	178_5_11_22-Sep	0	0	0	0.6
178	1	11	NA	NA	14	6	14-Jun	2017	02/08/2017	05/09/2017	33	45	50	5	NA	31	47	0	178_1_11_14-Jun	0	0	0	0.622222222222222
178	1	13	NA	NA	14	6	14-Jun	2017	02/08/2017	05/09/2017	33	15	58	43	NA	32	47	0	178_1_13_14-Jun	0	0	0	0.266666666666667
178	2	11	NA	NA	14	6	14-Jun	2017	02/08/2017	05/09/2017	33	63	63	0	NA	33	47	0	178_2_11_14-Jun	0	0	0	0.73015873015873
178	3	11	NA	NA	14	6	14-Jun	2017	02/08/2017	05/09/2017	33	44	48	4	NA	34	47	0	178_3_11_14-Jun	0	0	0	0.431818181818182
178	3	13	NA	NA	14	6	14-Jun	2017	02/08/2017	05/09/2017	33	46	64	18	NA	35	47	0	178_3_13_14-Jun	0	0	0	0.41304347826087
178	1	11	NA	NA	22	9	22-Sep	2017	13/12/2017	NA	44	7	31	24	NA	75	47	0	178_1_11_22-Sep	0	0	0	0.714285714285714
178	1	13	NA	NA	22	9	22-Sep	2017	13/12/2017	NA	44	22	36	14	NA	76	47	0	178_1_13_22-Sep	0	0	0	0.590909090909091
178	3	13	NA	NA	22	9	22-Sep	2017	13/12/2017	NA	44	49	62	13	NA	77	47	0	178_3_13_22-Sep	0	0	0	0.795918367346939
178	4	11	NA	NA	22	9	22-Sep	2017	13/12/2017	NA	44	5	63	58	NA	78	47	0	178_4_11_22-Sep	0	0	0	0.4
178	4	13	NA	NA	22	9	22-Sep	2017	13/12/2017	NA	44	12	32	20	NA	79	47	0	178_4_13_22-Sep	0	0	0	0.5
178	5	11	NA	NA	22	9	22-Sep	2017	13/12/2017	NA	44	5	60	55	NA	80	47	0	178_5_11_22-Sep	0	0	0	0.6
178	1	11	NA	NA	14	6	14-Jun	2017	02/08/2017	05/09/2017	33	45	50	5	NA	31	48	2	178_1_11_14-Jun	4	4.44444444444444	0.0444444444444444	0.666666666666667
178	1	13	NA	NA	14	6	14-Jun	2017	02/08/2017	05/09/2017	33	15	58	43	NA	32	48	0	178_1_13_14-Jun	0	0	0	0.266666666666667
178	2	11	NA	NA	14	6	14-Jun	2017	02/08/2017	05/09/2017	33	63	63	0	NA	33	48	5	178_2_11_14-Jun	7.93650793650794	7.93650793650794	0.0793650793650794	0.80952380952381
178	3	11	NA	NA	14	6	14-Jun	2017	02/08/2017	05/09/2017	33	44	48	4	NA	34	48	0	178_3_11_14-Jun	0	0	0	0.431818181818182
178	3	13	NA	NA	14	6	14-Jun	2017	02/08/2017	05/09/2017	33	46	64	18	NA	35	48	0	178_3_13_14-Jun	0	0	0	0.41304347826087
178	1	11	NA	NA	22	9	22-Sep	2017	13/12/2017	NA	44	7	31	24	NA	75	48	0	178_1_11_22-Sep	0	0	0	0.714285714285714
178	1	13	NA	NA	22	9	22-Sep	2017	13/12/2017	NA	44	22	36	14	NA	76	48	0	178_1_13_22-Sep	0	0	0	0.590909090909091
178	3	13	NA	NA	22	9	22-Sep	2017	13/12/2017	NA	44	49	62	13	NA	77	48	0	178_3_13_22-Sep	0	0	0	0.795918367346939
178	4	11	NA	NA	22	9	22-Sep	2017	13/12/2017	NA	44	5	63	58	NA	78	48	0	178_4_11_22-Sep	0	0	0	0.4
178	4	13	NA	NA	22	9	22-Sep	2017	13/12/2017	NA	44	12	32	20	NA	79	48	0	178_4_13_22-Sep	0	0	0	0.5
178	5	11	NA	NA	22	9	22-Sep	2017	13/12/2017	NA	44	5	60	55	NA	80	48	0	178_5_11_22-Sep	0	0	0	0.6
178	1	11	NA	NA	14	6	14-Jun	2017	02/08/2017	05/09/2017	33	45	50	5	NA	31	49	1	178_1_11_14-Jun	2	2.22222222222222	0.0222222222222222	0.688888888888889
178	1	13	NA	NA	14	6	14-Jun	2017	02/08/2017	05/09/2017	33	15	58	43	NA	32	49	0	178_1_13_14-Jun	0	0	0	0.266666666666667
178	2	11	NA	NA	14	6	14-Jun	2017	02/08/2017	05/09/2017	33	63	63	0	NA	33	49	3	178_2_11_14-Jun	4.76190476190476	4.76190476190476	0.0476190476190476	0.857142857142857
178	3	11	NA	NA	14	6	14-Jun	2017	02/08/2017	05/09/2017	33	44	48	4	NA	34	49	0	178_3_11_14-Jun	0	0	0	0.431818181818182
178	3	13	NA	NA	14	6	14-Jun	2017	02/08/2017	05/09/2017	33	46	64	18	NA	35	49	0	178_3_13_14-Jun	0	0	0	0.41304347826087
178	1	13	NA	NA	22	9	22-Sep	2017	13/12/2017	NA	44	22	36	14	NA	76	49	0	178_1_13_22-Sep	0	0	0	0.590909090909091
178	3	13	NA	NA	22	9	22-Sep	2017	13/12/2017	NA	44	49	62	13	NA	77	49	0	178_3_13_22-Sep	0	0	0	0.795918367346939
178	4	11	NA	NA	22	9	22-Sep	2017	13/12/2017	NA	44	5	63	58	NA	78	49	0	178_4_11_22-Sep	0	0	0	0.4
178	4	13	NA	NA	22	9	22-Sep	2017	13/12/2017	NA	44	12	32	20	NA	79	49	0	178_4_13_22-Sep	0	0	0	0.5
178	5	11	NA	NA	22	9	22-Sep	2017	13/12/2017	NA	44	5	60	55	NA	80	49	0	178_5_11_22-Sep	0	0	0	0.6
178	1	11	NA	NA	14	6	14-Jun	2017	02/08/2017	05/09/2017	33	45	50	5	NA	31	50	0	178_1_11_14-Jun	0	0	0	0.688888888888889
178	1	13	NA	NA	14	6	14-Jun	2017	02/08/2017	05/09/2017	33	15	58	43	NA	32	50	0	178_1_13_14-Jun	0	0	0	0.266666666666667
178	2	11	NA	NA	14	6	14-Jun	2017	02/08/2017	05/09/2017	33	63	63	0	NA	33	50	2	178_2_11_14-Jun	3.17460317460317	3.17460317460317	0.0317460317460317	0.888888888888889
178	3	11	NA	NA	14	6	14-Jun	2017	02/08/2017	05/09/2017	33	44	48	4	NA	34	50	0	178_3_11_14-Jun	0	0	0	0.431818181818182
178	3	13	NA	NA	14	6	14-Jun	2017	02/08/2017	05/09/2017	33	46	64	18	NA	35	50	0	178_3_13_14-Jun	0	0	0	0.41304347826087
178	1	11	NA	NA	22	9	22-Sep	2017	13/12/2017	NA	44	7	31	24	NA	75	50	0	178_1_11_22-Sep	0	0	0	0.714285714285714
178	1	13	NA	NA	22	9	22-Sep	2017	13/12/2017	NA	44	22	36	14	NA	76	50	0	178_1_13_22-Sep	0	0	0	0.590909090909091
178	3	13	NA	NA	22	9	22-Sep	2017	13/12/2017	NA	44	49	62	13	NA	77	50	0	178_3_13_22-Sep	0	0	0	0.795918367346939
178	4	11	NA	NA	22	9	22-Sep	2017	13/12/2017	NA	44	5	63	58	NA	78	50	0	178_4_11_22-Sep	0	0	0	0.4
178	4	13	NA	NA	22	9	22-Sep	2017	13/12/2017	NA	44	12	32	20	NA	79	50	0	178_4_13_22-Sep	0	0	0	0.5
178	5	11	NA	NA	22	9	22-Sep	2017	13/12/2017	NA	44	5	60	55	NA	80	50	0	178_5_11_22-Sep	0	0	0	0.6
178	1	11	NA	NA	14	6	14-Jun	2017	02/08/2017	05/09/2017	33	45	50	5	NA	31	51	0	178_1_11_14-Jun	0	0	0	0.688888888888889
178	1	13	NA	NA	14	6	14-Jun	2017	02/08/2017	05/09/2017	33	15	58	43	NA	32	51	0	178_1_13_14-Jun	0	0	0	0.266666666666667
178	2	11	NA	NA	14	6	14-Jun	2017	02/08/2017	05/09/2017	33	63	63	0	NA	33	51	0	178_2_11_14-Jun	0	0	0	0.888888888888889
178	3	11	NA	NA	14	6	14-Jun	2017	02/08/2017	05/09/2017	33	44	48	4	NA	34	51	1	178_3_11_14-Jun	2.08333333333333	2.27272727272727	0.0227272727272727	0.454545454545455
178	3	13	NA	NA	14	6	14-Jun	2017	02/08/2017	05/09/2017	33	46	64	18	NA	35	51	0	178_3_13_14-Jun	0	0	0	0.41304347826087
178	1	11	NA	NA	22	9	22-Sep	2017	13/12/2017	NA	44	7	31	24	NA	75	51	0	178_1_11_22-Sep	0	0	0	0.714285714285714
178	1	13	NA	NA	22	9	22-Sep	2017	13/12/2017	NA	44	22	36	14	NA	76	51	0	178_1_13_22-Sep	0	0	0	0.590909090909091
178	3	13	NA	NA	22	9	22-Sep	2017	13/12/2017	NA	44	49	62	13	NA	77	51	0	178_3_13_22-Sep	0	0	0	0.795918367346939
178	4	11	NA	NA	22	9	22-Sep	2017	13/12/2017	NA	44	5	63	58	NA	78	51	0	178_4_11_22-Sep	0	0	0	0.4
178	4	13	NA	NA	22	9	22-Sep	2017	13/12/2017	NA	44	12	32	20	NA	79	51	0	178_4_13_22-Sep	0	0	0	0.5
178	5	11	NA	NA	22	9	22-Sep	2017	13/12/2017	NA	44	5	60	55	NA	80	51	0	178_5_11_22-Sep	0	0	0	0.6
178	1	11	NA	NA	14	6	14-Jun	2017	02/08/2017	05/09/2017	33	45	50	5	NA	31	52	0	178_1_11_14-Jun	0	0	0	0.688888888888889
178	1	13	NA	NA	14	6	14-Jun	2017	02/08/2017	05/09/2017	33	15	58	43	NA	32	52	0	178_1_13_14-Jun	0	0	0	0.266666666666667
178	2	11	NA	NA	14	6	14-Jun	2017	02/08/2017	05/09/2017	33	63	63	0	NA	33	52	0	178_2_11_14-Jun	0	0	0	0.888888888888889
178	3	11	NA	NA	14	6	14-Jun	2017	02/08/2017	05/09/2017	33	44	48	4	NA	34	52	0	178_3_11_14-Jun	0	0	0	0.454545454545455
178	3	13	NA	NA	14	6	14-Jun	2017	02/08/2017	05/09/2017	33	46	64	18	NA	35	52	0	178_3_13_14-Jun	0	0	0	0.41304347826087
178	1	11	NA	NA	22	9	22-Sep	2017	13/12/2017	NA	44	7	31	24	NA	75	52	1	178_1_11_22-Sep	3.2258064516129	14.2857142857143	0.142857142857143	0.857142857142857
178	1	13	NA	NA	22	9	22-Sep	2017	13/12/2017	NA	44	22	36	14	NA	76	52	0	178_1_13_22-Sep	0	0	0	0.590909090909091
178	3	13	NA	NA	22	9	22-Sep	2017	13/12/2017	NA	44	49	62	13	NA	77	52	0	178_3_13_22-Sep	0	0	0	0.795918367346939
178	4	11	NA	NA	22	9	22-Sep	2017	13/12/2017	NA	44	5	63	58	NA	78	52	0	178_4_11_22-Sep	0	0	0	0.4
178	4	13	NA	NA	22	9	22-Sep	2017	13/12/2017	NA	44	12	32	20	NA	79	52	0	178_4_13_22-Sep	0	0	0	0.5
178	5	11	NA	NA	22	9	22-Sep	2017	13/12/2017	NA	44	5	60	55	NA	80	52	0	178_5_11_22-Sep	0	0	0	0.6
178	1	11	NA	NA	14	6	14-Jun	2017	02/08/2017	05/09/2017	33	45	50	5	NA	31	53	0	178_1_11_14-Jun	0	0	0	0.688888888888889
178	1	13	NA	NA	14	6	14-Jun	2017	02/08/2017	05/09/2017	33	15	58	43	NA	32	53	0	178_1_13_14-Jun	0	0	0	0.266666666666667
178	2	11	NA	NA	14	6	14-Jun	2017	02/08/2017	05/09/2017	33	63	63	0	NA	33	53	0	178_2_11_14-Jun	0	0	0	0.888888888888889
178	3	11	NA	NA	14	6	14-Jun	2017	02/08/2017	05/09/2017	33	44	48	4	NA	34	53	0	178_3_11_14-Jun	0	0	0	0.454545454545455
178	3	13	NA	NA	14	6	14-Jun	2017	02/08/2017	05/09/2017	33	46	64	18	NA	35	53	0	178_3_13_14-Jun	0	0	0	0.41304347826087
178	1	11	NA	NA	22	9	22-Sep	2017	13/12/2017	NA	44	7	31	24	NA	75	53	0	178_1_11_22-Sep	0	0	0	0.857142857142857
178	1	13	NA	NA	22	9	22-Sep	2017	13/12/2017	NA	44	22	36	14	NA	76	53	0	178_1_13_22-Sep	0	0	0	0.590909090909091
178	3	13	NA	NA	22	9	22-Sep	2017	13/12/2017	NA	44	49	62	13	NA	77	53	0	178_3_13_22-Sep	0	0	0	0.795918367346939
178	4	11	NA	NA	22	9	22-Sep	2017	13/12/2017	NA	44	5	63	58	NA	78	53	0	178_4_11_22-Sep	0	0	0	0.4
178	4	13	NA	NA	22	9	22-Sep	2017	13/12/2017	NA	44	12	32	20	NA	79	53	0	178_4_13_22-Sep	0	0	0	0.5
178	5	11	NA	NA	22	9	22-Sep	2017	13/12/2017	NA	44	5	60	55	NA	80	53	0	178_5_11_22-Sep	0	0	0	0.6
178	1	11	NA	NA	14	6	14-Jun	2017	02/08/2017	05/09/2017	33	45	50	5	NA	31	54	6	178_1_11_14-Jun	12	13.3333333333333	0.133333333333333	0.822222222222222
178	1	13	NA	NA	14	6	14-Jun	2017	02/08/2017	05/09/2017	33	15	58	43	NA	32	54	4	178_1_13_14-Jun	6.89655172413793	26.6666666666667	0.266666666666667	0.533333333333333
178	2	11	NA	NA	14	6	14-Jun	2017	02/08/2017	05/09/2017	33	63	63	0	NA	33	54	2	178_2_11_14-Jun	3.17460317460317	3.17460317460317	0.0317460317460317	0.920634920634921
178	3	11	NA	NA	14	6	14-Jun	2017	02/08/2017	05/09/2017	33	44	48	4	NA	34	54	15	178_3_11_14-Jun	31.25	34.0909090909091	0.340909090909091	0.795454545454545
178	3	13	NA	NA	14	6	14-Jun	2017	02/08/2017	05/09/2017	33	46	64	18	NA	35	54	27	178_3_13_14-Jun	42.1875	58.695652173913	0.58695652173913	1
178	1	11	NA	NA	22	9	22-Sep	2017	13/12/2017	NA	44	7	31	24	NA	75	54	0	178_1_11_22-Sep	0	0	0	0.857142857142857
178	1	13	NA	NA	22	9	22-Sep	2017	13/12/2017	NA	44	22	36	14	NA	76	54	0	178_1_13_22-Sep	0	0	0	0.590909090909091
178	3	13	NA	NA	22	9	22-Sep	2017	13/12/2017	NA	44	49	62	13	NA	77	54	2	178_3_13_22-Sep	3.2258064516129	4.08163265306122	0.0408163265306122	0.836734693877551
178	4	11	NA	NA	22	9	22-Sep	2017	13/12/2017	NA	44	5	63	58	NA	78	54	0	178_4_11_22-Sep	0	0	0	0.4
178	4	13	NA	NA	22	9	22-Sep	2017	13/12/2017	NA	44	12	32	20	NA	79	54	0	178_4_13_22-Sep	0	0	0	0.5
178	5	11	NA	NA	22	9	22-Sep	2017	13/12/2017	NA	44	5	60	55	NA	80	54	0	178_5_11_22-Sep	0	0	0	0.6
178	1	11	NA	NA	14	6	14-Jun	2017	02/08/2017	05/09/2017	33	45	50	5	NA	31	55	0	178_1_11_14-Jun	0	0	0	0.822222222222222
178	1	13	NA	NA	14	6	14-Jun	2017	02/08/2017	05/09/2017	33	15	58	43	NA	32	55	0	178_1_13_14-Jun	0	0	0	0.533333333333333
178	2	11	NA	NA	14	6	14-Jun	2017	02/08/2017	05/09/2017	33	63	63	0	NA	33	55	0	178_2_11_14-Jun	0	0	0	0.920634920634921
178	3	11	NA	NA	14	6	14-Jun	2017	02/08/2017	05/09/2017	33	44	48	4	NA	34	55	1	178_3_11_14-Jun	2.08333333333333	2.27272727272727	0.0227272727272727	0.818181818181818
178	3	13	NA	NA	14	6	14-Jun	2017	02/08/2017	05/09/2017	33	46	64	18	NA	35	55	0	178_3_13_14-Jun	0	0	0	1
178	1	11	NA	NA	22	9	22-Sep	2017	13/12/2017	NA	44	7	31	24	NA	75	55	0	178_1_11_22-Sep	0	0	0	0.857142857142857
178	1	13	NA	NA	22	9	22-Sep	2017	13/12/2017	NA	44	22	36	14	NA	76	55	0	178_1_13_22-Sep	0	0	0	0.590909090909091
178	3	13	NA	NA	22	9	22-Sep	2017	13/12/2017	NA	44	49	62	13	NA	77	55	0	178_3_13_22-Sep	0	0	0	0.836734693877551
178	4	11	NA	NA	22	9	22-Sep	2017	13/12/2017	NA	44	5	63	58	NA	78	55	0	178_4_11_22-Sep	0	0	0	0.4
178	4	13	NA	NA	22	9	22-Sep	2017	13/12/2017	NA	44	12	32	20	NA	79	55	0	178_4_13_22-Sep	0	0	0	0.5
178	5	11	NA	NA	22	9	22-Sep	2017	13/12/2017	NA	44	5	60	55	NA	80	55	0	178_5_11_22-Sep	0	0	0	0.6
178	1	11	NA	NA	14	6	14-Jun	2017	02/08/2017	05/09/2017	33	45	50	5	NA	31	56	0	178_1_11_14-Jun	0	0	0	0.822222222222222
178	1	13	NA	NA	14	6	14-Jun	2017	02/08/2017	05/09/2017	33	15	58	43	NA	32	56	2	178_1_13_14-Jun	3.44827586206897	13.3333333333333	0.133333333333333	0.666666666666667
178	2	11	NA	NA	14	6	14-Jun	2017	02/08/2017	05/09/2017	33	63	63	0	NA	33	56	4	178_2_11_14-Jun	6.34920634920635	6.34920634920635	0.0634920634920635	0.984126984126984
178	3	11	NA	NA	14	6	14-Jun	2017	02/08/2017	05/09/2017	33	44	48	4	NA	34	56	1	178_3_11_14-Jun	2.08333333333333	2.27272727272727	0.0227272727272727	0.840909090909091
178	3	13	NA	NA	14	6	14-Jun	2017	02/08/2017	05/09/2017	33	46	64	18	NA	35	56	0	178_3_13_14-Jun	0	0	0	1
178	1	11	NA	NA	22	9	22-Sep	2017	13/12/2017	NA	44	7	31	24	NA	75	56	0	178_1_11_22-Sep	0	0	0	0.857142857142857
178	1	13	NA	NA	22	9	22-Sep	2017	13/12/2017	NA	44	22	36	14	NA	76	56	0	178_1_13_22-Sep	0	0	0	0.590909090909091
178	3	13	NA	NA	22	9	22-Sep	2017	13/12/2017	NA	44	49	62	13	NA	77	56	0	178_3_13_22-Sep	0	0	0	0.836734693877551
178	4	11	NA	NA	22	9	22-Sep	2017	13/12/2017	NA	44	5	63	58	NA	78	56	0	178_4_11_22-Sep	0	0	0	0.4
178	4	13	NA	NA	22	9	22-Sep	2017	13/12/2017	NA	44	12	32	20	NA	79	56	0	178_4_13_22-Sep	0	0	0	0.5
178	5	11	NA	NA	22	9	22-Sep	2017	13/12/2017	NA	44	5	60	55	NA	80	56	0	178_5_11_22-Sep	0	0	0	0.6
178	1	11	NA	NA	14	6	14-Jun	2017	02/08/2017	05/09/2017	33	45	50	5	NA	31	57	0	178_1_11_14-Jun	0	0	0	0.822222222222222
178	1	13	NA	NA	14	6	14-Jun	2017	02/08/2017	05/09/2017	33	15	58	43	NA	32	57	1	178_1_13_14-Jun	1.72413793103448	6.66666666666667	0.0666666666666667	0.733333333333333
178	2	11	NA	NA	14	6	14-Jun	2017	02/08/2017	05/09/2017	33	63	63	0	NA	33	57	0	178_2_11_14-Jun	0	0	0	0.984126984126984
178	3	11	NA	NA	14	6	14-Jun	2017	02/08/2017	05/09/2017	33	44	48	4	NA	34	57	0	178_3_11_14-Jun	0	0	0	0.840909090909091
178	3	13	NA	NA	14	6	14-Jun	2017	02/08/2017	05/09/2017	33	46	64	18	NA	35	57	0	178_3_13_14-Jun	0	0	0	1
178	1	11	NA	NA	22	9	22-Sep	2017	13/12/2017	NA	44	7	31	24	NA	75	57	0	178_1_11_22-Sep	0	0	0	0.857142857142857
178	1	13	NA	NA	22	9	22-Sep	2017	13/12/2017	NA	44	22	36	14	NA	76	57	2	178_1_13_22-Sep	5.55555555555556	9.09090909090909	0.0909090909090909	0.681818181818182
178	3	13	NA	NA	22	9	22-Sep	2017	13/12/2017	NA	44	49	62	13	NA	77	57	2	178_3_13_22-Sep	3.2258064516129	4.08163265306122	0.0408163265306122	0.877551020408163
178	4	11	NA	NA	22	9	22-Sep	2017	13/12/2017	NA	44	5	63	58	NA	78	57	0	178_4_11_22-Sep	0	0	0	0.4
178	4	13	NA	NA	22	9	22-Sep	2017	13/12/2017	NA	44	12	32	20	NA	79	57	2	178_4_13_22-Sep	6.25	16.6666666666667	0.166666666666667	0.666666666666667
178	5	11	NA	NA	22	9	22-Sep	2017	13/12/2017	NA	44	5	60	55	NA	80	57	0	178_5_11_22-Sep	0	0	0	0.6
178	1	11	NA	NA	14	6	14-Jun	2017	02/08/2017	05/09/2017	33	45	50	5	NA	31	58	0	178_1_11_14-Jun	0	0	0	0.822222222222222
178	1	13	NA	NA	14	6	14-Jun	2017	02/08/2017	05/09/2017	33	15	58	43	NA	32	58	0	178_1_13_14-Jun	0	0	0	0.733333333333333
178	2	11	NA	NA	14	6	14-Jun	2017	02/08/2017	05/09/2017	33	63	63	0	NA	33	58	0	178_2_11_14-Jun	0	0	0	0.984126984126984
178	3	11	NA	NA	14	6	14-Jun	2017	02/08/2017	05/09/2017	33	44	48	4	NA	34	58	0	178_3_11_14-Jun	0	0	0	0.840909090909091
178	3	13	NA	NA	14	6	14-Jun	2017	02/08/2017	05/09/2017	33	46	64	18	NA	35	58	0	178_3_13_14-Jun	0	0	0	1
178	1	11	NA	NA	22	9	22-Sep	2017	13/12/2017	NA	44	7	31	24	NA	75	58	0	178_1_11_22-Sep	0	0	0	0.857142857142857
178	1	13	NA	NA	22	9	22-Sep	2017	13/12/2017	NA	44	22	36	14	NA	76	58	1	178_1_13_22-Sep	2.77777777777778	4.54545454545455	0.0454545454545455	0.727272727272727
178	3	13	NA	NA	22	9	22-Sep	2017	13/12/2017	NA	44	49	62	13	NA	77	58	1	178_3_13_22-Sep	1.61290322580645	2.04081632653061	0.0204081632653061	0.897959183673469
178	4	11	NA	NA	22	9	22-Sep	2017	13/12/2017	NA	44	5	63	58	NA	78	58	0	178_4_11_22-Sep	0	0	0	0.4
178	4	13	NA	NA	22	9	22-Sep	2017	13/12/2017	NA	44	12	32	20	NA	79	58	1	178_4_13_22-Sep	3.125	8.33333333333333	0.0833333333333333	0.75
178	5	11	NA	NA	22	9	22-Sep	2017	13/12/2017	NA	44	5	60	55	NA	80	58	0	178_5_11_22-Sep	0	0	0	0.6
178	1	11	NA	NA	14	6	14-Jun	2017	02/08/2017	05/09/2017	33	45	50	5	NA	31	59	1	178_1_11_14-Jun	2	2.22222222222222	0.0222222222222222	0.844444444444444
178	1	13	NA	NA	14	6	14-Jun	2017	02/08/2017	05/09/2017	33	15	58	43	NA	32	59	0	178_1_13_14-Jun	0	0	0	0.733333333333333
178	2	11	NA	NA	14	6	14-Jun	2017	02/08/2017	05/09/2017	33	63	63	0	NA	33	59	0	178_2_11_14-Jun	0	0	0	0.984126984126984
178	3	11	NA	NA	14	6	14-Jun	2017	02/08/2017	05/09/2017	33	44	48	4	NA	34	59	0	178_3_11_14-Jun	0	0	0	0.840909090909091
178	3	13	NA	NA	14	6	14-Jun	2017	02/08/2017	05/09/2017	33	46	64	18	NA	35	59	0	178_3_13_14-Jun	0	0	0	1
178	1	11	NA	NA	22	9	22-Sep	2017	13/12/2017	NA	44	7	31	24	NA	75	59	0	178_1_11_22-Sep	0	0	0	0.857142857142857
178	1	13	NA	NA	22	9	22-Sep	2017	13/12/2017	NA	44	22	36	14	NA	76	59	2	178_1_13_22-Sep	5.55555555555556	9.09090909090909	0.0909090909090909	0.818181818181818
178	3	13	NA	NA	22	9	22-Sep	2017	13/12/2017	NA	44	49	62	13	NA	77	59	0	178_3_13_22-Sep	0	0	0	0.897959183673469
178	4	11	NA	NA	22	9	22-Sep	2017	13/12/2017	NA	44	5	63	58	NA	78	59	1	178_4_11_22-Sep	1.58730158730159	20	0.2	0.6
178	4	13	NA	NA	22	9	22-Sep	2017	13/12/2017	NA	44	12	32	20	NA	79	59	0	178_4_13_22-Sep	0	0	0	0.75
178	5	11	NA	NA	22	9	22-Sep	2017	13/12/2017	NA	44	5	60	55	NA	80	59	0	178_5_11_22-Sep	0	0	0	0.6
178	1	11	NA	NA	14	6	14-Jun	2017	02/08/2017	05/09/2017	33	45	50	5	NA	31	60	0	178_1_11_14-Jun	0	0	0	0.844444444444444
178	1	13	NA	NA	14	6	14-Jun	2017	02/08/2017	05/09/2017	33	15	58	43	NA	32	60	0	178_1_13_14-Jun	0	0	0	0.733333333333333
178	2	11	NA	NA	14	6	14-Jun	2017	02/08/2017	05/09/2017	33	63	63	0	NA	33	60	0	178_2_11_14-Jun	0	0	0	0.984126984126984
178	3	11	NA	NA	14	6	14-Jun	2017	02/08/2017	05/09/2017	33	44	48	4	NA	34	60	0	178_3_11_14-Jun	0	0	0	0.840909090909091
178	3	13	NA	NA	14	6	14-Jun	2017	02/08/2017	05/09/2017	33	46	64	18	NA	35	60	0	178_3_13_14-Jun	0	0	0	1
178	1	11	NA	NA	22	9	22-Sep	2017	13/12/2017	NA	44	7	31	24	NA	75	60	0	178_1_11_22-Sep	0	0	0	0.857142857142857
178	1	13	NA	NA	22	9	22-Sep	2017	13/12/2017	NA	44	22	36	14	NA	76	60	1	178_1_13_22-Sep	2.77777777777778	4.54545454545455	0.0454545454545455	0.863636363636364
178	3	13	NA	NA	22	9	22-Sep	2017	13/12/2017	NA	44	49	62	13	NA	77	60	0	178_3_13_22-Sep	0	0	0	0.897959183673469
178	4	11	NA	NA	22	9	22-Sep	2017	13/12/2017	NA	44	5	63	58	NA	78	60	0	178_4_11_22-Sep	0	0	0	0.6
178	4	13	NA	NA	22	9	22-Sep	2017	13/12/2017	NA	44	12	32	20	NA	79	60	0	178_4_13_22-Sep	0	0	0	0.75
178	5	11	NA	NA	22	9	22-Sep	2017	13/12/2017	NA	44	5	60	55	NA	80	60	0	178_5_11_22-Sep	0	0	0	0.6
178	1	11	NA	NA	14	6	14-Jun	2017	02/08/2017	05/09/2017	33	45	50	5	NA	31	61	0	178_1_11_14-Jun	0	0	0	0.844444444444444
178	1	13	NA	NA	14	6	14-Jun	2017	02/08/2017	05/09/2017	33	15	58	43	NA	32	61	0	178_1_13_14-Jun	0	0	0	0.733333333333333
178	2	11	NA	NA	14	6	14-Jun	2017	02/08/2017	05/09/2017	33	63	63	0	NA	33	61	0	178_2_11_14-Jun	0	0	0	0.984126984126984
178	3	11	NA	NA	14	6	14-Jun	2017	02/08/2017	05/09/2017	33	44	48	4	NA	34	61	0	178_3_11_14-Jun	0	0	0	0.840909090909091
178	3	13	NA	NA	14	6	14-Jun	2017	02/08/2017	05/09/2017	33	46	64	18	NA	35	61	0	178_3_13_14-Jun	0	0	0	1
178	1	11	NA	NA	22	9	22-Sep	2017	13/12/2017	NA	44	7	31	24	NA	75	61	0	178_1_11_22-Sep	0	0	0	0.857142857142857
178	1	13	NA	NA	22	9	22-Sep	2017	13/12/2017	NA	44	22	36	14	NA	76	61	2	178_1_13_22-Sep	5.55555555555556	9.09090909090909	0.0909090909090909	0.954545454545455
178	3	13	NA	NA	22	9	22-Sep	2017	13/12/2017	NA	44	49	62	13	NA	77	61	0	178_3_13_22-Sep	0	0	0	0.897959183673469
178	4	11	NA	NA	22	9	22-Sep	2017	13/12/2017	NA	44	5	63	58	NA	78	61	0	178_4_11_22-Sep	0	0	0	0.6
178	4	13	NA	NA	22	9	22-Sep	2017	13/12/2017	NA	44	12	32	20	NA	79	61	0	178_4_13_22-Sep	0	0	0	0.75
178	5	11	NA	NA	22	9	22-Sep	2017	13/12/2017	NA	44	5	60	55	NA	80	61	0	178_5_11_22-Sep	0	0	0	0.6
178	1	11	NA	NA	14	6	14-Jun	2017	02/08/2017	05/09/2017	33	45	50	5	NA	31	62	0	178_1_11_14-Jun	0	0	0	0.844444444444444
178	1	13	NA	NA	14	6	14-Jun	2017	02/08/2017	05/09/2017	33	15	58	43	NA	32	62	0	178_1_13_14-Jun	0	0	0	0.733333333333333
178	2	11	NA	NA	14	6	14-Jun	2017	02/08/2017	05/09/2017	33	63	63	0	NA	33	62	0	178_2_11_14-Jun	0	0	0	0.984126984126984
178	3	11	NA	NA	14	6	14-Jun	2017	02/08/2017	05/09/2017	33	44	48	4	NA	34	62	0	178_3_11_14-Jun	0	0	0	0.840909090909091
178	3	13	NA	NA	14	6	14-Jun	2017	02/08/2017	05/09/2017	33	46	64	18	NA	35	62	0	178_3_13_14-Jun	0	0	0	1
178	1	11	NA	NA	22	9	22-Sep	2017	13/12/2017	NA	44	7	31	24	NA	75	62	1	178_1_11_22-Sep	3.2258064516129	14.2857142857143	0.142857142857143	1
178	1	13	NA	NA	22	9	22-Sep	2017	13/12/2017	NA	44	22	36	14	NA	76	62	0	178_1_13_22-Sep	0	0	0	0.954545454545455
178	3	13	NA	NA	22	9	22-Sep	2017	13/12/2017	NA	44	49	62	13	NA	77	62	0	178_3_13_22-Sep	0	0	0	0.897959183673469
178	4	11	NA	NA	22	9	22-Sep	2017	13/12/2017	NA	44	5	63	58	NA	78	62	1	178_4_11_22-Sep	1.58730158730159	20	0.2	0.8
178	4	13	NA	NA	22	9	22-Sep	2017	13/12/2017	NA	44	12	32	20	NA	79	62	0	178_4_13_22-Sep	0	0	0	0.75
178	5	11	NA	NA	22	9	22-Sep	2017	13/12/2017	NA	44	5	60	55	NA	80	62	0	178_5_11_22-Sep	0	0	0	0.6
178	1	11	NA	NA	14	6	14-Jun	2017	02/08/2017	05/09/2017	33	45	50	5	NA	31	63	0	178_1_11_14-Jun	0	0	0	0.844444444444444
178	1	13	NA	NA	14	6	14-Jun	2017	02/08/2017	05/09/2017	33	15	58	43	NA	32	63	0	178_1_13_14-Jun	0	0	0	0.733333333333333
178	2	11	NA	NA	14	6	14-Jun	2017	02/08/2017	05/09/2017	33	63	63	0	NA	33	63	1	178_2_11_14-Jun	1.58730158730159	1.58730158730159	0.0158730158730159	1
178	3	11	NA	NA	14	6	14-Jun	2017	02/08/2017	05/09/2017	33	44	48	4	NA	34	63	0	178_3_11_14-Jun	0	0	0	0.840909090909091
178	3	13	NA	NA	14	6	14-Jun	2017	02/08/2017	05/09/2017	33	46	64	18	NA	35	63	0	178_3_13_14-Jun	0	0	0	1
178	1	11	NA	NA	22	9	22-Sep	2017	13/12/2017	NA	44	7	31	24	NA	75	63	0	178_1_11_22-Sep	0	0	0	1
178	1	13	NA	NA	22	9	22-Sep	2017	13/12/2017	NA	44	22	36	14	NA	76	63	1	178_1_13_22-Sep	2.77777777777778	4.54545454545455	0.0454545454545455	1
178	3	13	NA	NA	22	9	22-Sep	2017	13/12/2017	NA	44	49	62	13	NA	77	63	1	178_3_13_22-Sep	1.61290322580645	2.04081632653061	0.0204081632653061	0.918367346938776
178	4	11	NA	NA	22	9	22-Sep	2017	13/12/2017	NA	44	5	63	58	NA	78	63	0	178_4_11_22-Sep	0	0	0	0.8
178	4	13	NA	NA	22	9	22-Sep	2017	13/12/2017	NA	44	12	32	20	NA	79	63	2	178_4_13_22-Sep	6.25	16.6666666666667	0.166666666666667	0.916666666666667
178	5	11	NA	NA	22	9	22-Sep	2017	13/12/2017	NA	44	5	60	55	NA	80	63	0	178_5_11_22-Sep	0	0	0	0.6
178	1	11	NA	NA	14	6	14-Jun	2017	02/08/2017	05/09/2017	33	45	50	5	NA	31	64	1	178_1_11_14-Jun	2	2.22222222222222	0.0222222222222222	0.866666666666667
178	1	13	NA	NA	14	6	14-Jun	2017	02/08/2017	05/09/2017	33	15	58	43	NA	32	64	0	178_1_13_14-Jun	0	0	0	0.733333333333333
178	3	11	NA	NA	14	6	14-Jun	2017	02/08/2017	05/09/2017	33	44	48	4	NA	34	64	0	178_3_11_14-Jun	0	0	0	0.840909090909091
178	3	13	NA	NA	14	6	14-Jun	2017	02/08/2017	05/09/2017	33	46	64	18	NA	35	64	0	178_3_13_14-Jun	0	0	0	1
178	1	11	NA	NA	22	9	22-Sep	2017	13/12/2017	NA	44	7	31	24	NA	75	64	0	178_1_11_22-Sep	0	0	0	1
178	1	13	NA	NA	22	9	22-Sep	2017	13/12/2017	NA	44	22	36	14	NA	76	64	0	178_1_13_22-Sep	0	0	0	1
178	3	13	NA	NA	22	9	22-Sep	2017	13/12/2017	NA	44	49	62	13	NA	77	64	0	178_3_13_22-Sep	0	0	0	0.918367346938776
178	4	11	NA	NA	22	9	22-Sep	2017	13/12/2017	NA	44	5	63	58	NA	78	64	0	178_4_11_22-Sep	0	0	0	0.8
178	4	13	NA	NA	22	9	22-Sep	2017	13/12/2017	NA	44	12	32	20	NA	79	64	0	178_4_13_22-Sep	0	0	0	0.916666666666667
178	5	11	NA	NA	22	9	22-Sep	2017	13/12/2017	NA	44	5	60	55	NA	80	64	0	178_5_11_22-Sep	0	0	0	0.6
178	1	11	NA	NA	14	6	14-Jun	2017	02/08/2017	05/09/2017	33	45	50	5	NA	31	65	0	178_1_11_14-Jun	0	0	0	0.866666666666667
178	1	13	NA	NA	14	6	14-Jun	2017	02/08/2017	05/09/2017	33	15	58	43	NA	32	65	0	178_1_13_14-Jun	0	0	0	0.733333333333333
178	3	11	NA	NA	14	6	14-Jun	2017	02/08/2017	05/09/2017	33	44	48	4	NA	34	65	0	178_3_11_14-Jun	0	0	0	0.840909090909091
178	3	13	NA	NA	14	6	14-Jun	2017	02/08/2017	05/09/2017	33	46	64	18	NA	35	65	0	178_3_13_14-Jun	0	0	0	1
178	1	11	NA	NA	22	9	22-Sep	2017	13/12/2017	NA	44	7	31	24	NA	75	65	0	178_1_11_22-Sep	0	0	0	1
178	1	13	NA	NA	22	9	22-Sep	2017	13/12/2017	NA	44	22	36	14	NA	76	65	0	178_1_13_22-Sep	0	0	0	1
178	3	13	NA	NA	22	9	22-Sep	2017	13/12/2017	NA	44	49	62	13	NA	77	65	1	178_3_13_22-Sep	1.61290322580645	2.04081632653061	0.0204081632653061	0.938775510204082
178	4	11	NA	NA	22	9	22-Sep	2017	13/12/2017	NA	44	5	63	58	NA	78	65	0	178_4_11_22-Sep	0	0	0	0.8
178	4	13	NA	NA	22	9	22-Sep	2017	13/12/2017	NA	44	12	32	20	NA	79	65	0	178_4_13_22-Sep	0	0	0	0.916666666666667
178	5	11	NA	NA	22	9	22-Sep	2017	13/12/2017	NA	44	5	60	55	NA	80	65	0	178_5_11_22-Sep	0	0	0	0.6
178	1	11	NA	NA	14	6	14-Jun	2017	02/08/2017	05/09/2017	33	45	50	5	NA	31	66	0	178_1_11_14-Jun	0	0	0	0.866666666666667
178	1	13	NA	NA	14	6	14-Jun	2017	02/08/2017	05/09/2017	33	15	58	43	NA	32	66	0	178_1_13_14-Jun	0	0	0	0.733333333333333
178	3	11	NA	NA	14	6	14-Jun	2017	02/08/2017	05/09/2017	33	44	48	4	NA	34	66	0	178_3_11_14-Jun	0	0	0	0.840909090909091
178	3	13	NA	NA	14	6	14-Jun	2017	02/08/2017	05/09/2017	33	46	64	18	NA	35	66	0	178_3_13_14-Jun	0	0	0	1
178	1	11	NA	NA	22	9	22-Sep	2017	13/12/2017	NA	44	7	31	24	NA	75	66	0	178_1_11_22-Sep	0	0	0	1
178	1	13	NA	NA	22	9	22-Sep	2017	13/12/2017	NA	44	22	36	14	NA	76	66	0	178_1_13_22-Sep	0	0	0	1
178	3	13	NA	NA	22	9	22-Sep	2017	13/12/2017	NA	44	49	62	13	NA	77	66	1	178_3_13_22-Sep	1.61290322580645	2.04081632653061	0.0204081632653061	0.959183673469388
178	4	11	NA	NA	22	9	22-Sep	2017	13/12/2017	NA	44	5	63	58	NA	78	66	0	178_4_11_22-Sep	0	0	0	0.8
178	4	13	NA	NA	22	9	22-Sep	2017	13/12/2017	NA	44	12	32	20	NA	79	66	0	178_4_13_22-Sep	0	0	0	0.916666666666667
178	5	11	NA	NA	22	9	22-Sep	2017	13/12/2017	NA	44	5	60	55	NA	80	66	0	178_5_11_22-Sep	0	0	0	0.6
178	1	11	NA	NA	14	6	14-Jun	2017	02/08/2017	05/09/2017	33	45	50	5	NA	31	67	0	178_1_11_14-Jun	0	0	0	0.866666666666667
178	1	13	NA	NA	14	6	14-Jun	2017	02/08/2017	05/09/2017	33	15	58	43	NA	32	67	0	178_1_13_14-Jun	0	0	0	0.733333333333333
178	3	11	NA	NA	14	6	14-Jun	2017	02/08/2017	05/09/2017	33	44	48	4	NA	34	67	0	178_3_11_14-Jun	0	0	0	0.840909090909091
178	3	13	NA	NA	14	6	14-Jun	2017	02/08/2017	05/09/2017	33	46	64	18	NA	35	67	0	178_3_13_14-Jun	0	0	0	1
178	1	11	NA	NA	22	9	22-Sep	2017	13/12/2017	NA	44	7	31	24	NA	75	67	0	178_1_11_22-Sep	0	0	0	1
178	1	13	NA	NA	22	9	22-Sep	2017	13/12/2017	NA	44	22	36	14	NA	76	67	0	178_1_13_22-Sep	0	0	0	1
178	3	13	NA	NA	22	9	22-Sep	2017	13/12/2017	NA	44	49	62	13	NA	77	67	1	178_3_13_22-Sep	1.61290322580645	2.04081632653061	0.0204081632653061	0.979591836734694
178	4	11	NA	NA	22	9	22-Sep	2017	13/12/2017	NA	44	5	63	58	NA	78	67	0	178_4_11_22-Sep	0	0	0	0.8
178	4	13	NA	NA	22	9	22-Sep	2017	13/12/2017	NA	44	12	32	20	NA	79	67	0	178_4_13_22-Sep	0	0	0	0.916666666666667
178	5	11	NA	NA	22	9	22-Sep	2017	13/12/2017	NA	44	5	60	55	NA	80	67	0	178_5_11_22-Sep	0	0	0	0.6
178	1	11	NA	NA	14	6	14-Jun	2017	02/08/2017	05/09/2017	33	45	50	5	NA	31	68	5	178_1_11_14-Jun	10	11.1111111111111	0.111111111111111	0.977777777777778
178	1	13	NA	NA	14	6	14-Jun	2017	02/08/2017	05/09/2017	33	15	58	43	NA	32	68	0	178_1_13_14-Jun	0	0	0	0.733333333333333
178	3	11	NA	NA	14	6	14-Jun	2017	02/08/2017	05/09/2017	33	44	48	4	NA	34	68	0	178_3_11_14-Jun	0	0	0	0.840909090909091
178	3	13	NA	NA	14	6	14-Jun	2017	02/08/2017	05/09/2017	33	46	64	18	NA	35	68	0	178_3_13_14-Jun	0	0	0	1
178	1	11	NA	NA	22	9	22-Sep	2017	13/12/2017	NA	44	7	31	24	NA	75	68	0	178_1_11_22-Sep	0	0	0	1
178	1	13	NA	NA	22	9	22-Sep	2017	13/12/2017	NA	44	22	36	14	NA	76	68	0	178_1_13_22-Sep	0	0	0	1
178	3	13	NA	NA	22	9	22-Sep	2017	13/12/2017	NA	44	49	62	13	NA	77	68	0	178_3_13_22-Sep	0	0	0	0.979591836734694
178	4	11	NA	NA	22	9	22-Sep	2017	13/12/2017	NA	44	5	63	58	NA	78	68	0	178_4_11_22-Sep	0	0	0	0.8
178	4	13	NA	NA	22	9	22-Sep	2017	13/12/2017	NA	44	12	32	20	NA	79	68	0	178_4_13_22-Sep	0	0	0	0.916666666666667
178	5	11	NA	NA	22	9	22-Sep	2017	13/12/2017	NA	44	5	60	55	NA	80	68	1	178_5_11_22-Sep	1.66666666666667	20	0.2	0.8
178	1	11	NA	NA	14	6	14-Jun	2017	02/08/2017	05/09/2017	33	45	50	5	NA	31	69	1	178_1_11_14-Jun	2	2.22222222222222	0.0222222222222222	1
178	1	13	NA	NA	14	6	14-Jun	2017	02/08/2017	05/09/2017	33	15	58	43	NA	32	69	1	178_1_13_14-Jun	1.72413793103448	6.66666666666667	0.0666666666666667	0.8
178	3	11	NA	NA	14	6	14-Jun	2017	02/08/2017	05/09/2017	33	44	48	4	NA	34	69	1	178_3_11_14-Jun	2.08333333333333	2.27272727272727	0.0227272727272727	0.863636363636364
178	3	13	NA	NA	14	6	14-Jun	2017	02/08/2017	05/09/2017	33	46	64	18	NA	35	69	0	178_3_13_14-Jun	0	0	0	1
178	1	11	NA	NA	22	9	22-Sep	2017	13/12/2017	NA	44	7	31	24	NA	75	69	0	178_1_11_22-Sep	0	0	0	1
178	1	13	NA	NA	22	9	22-Sep	2017	13/12/2017	NA	44	22	36	14	NA	76	69	0	178_1_13_22-Sep	0	0	0	1
178	3	13	NA	NA	22	9	22-Sep	2017	13/12/2017	NA	44	49	62	13	NA	77	69	0	178_3_13_22-Sep	0	0	0	0.979591836734694
178	4	11	NA	NA	22	9	22-Sep	2017	13/12/2017	NA	44	5	63	58	NA	78	69	0	178_4_11_22-Sep	0	0	0	0.8
178	4	13	NA	NA	22	9	22-Sep	2017	13/12/2017	NA	44	12	32	20	NA	79	69	0	178_4_13_22-Sep	0	0	0	0.916666666666667
178	5	11	NA	NA	22	9	22-Sep	2017	13/12/2017	NA	44	5	60	55	NA	80	69	0	178_5_11_22-Sep	0	0	0	0.8
178	1	11	NA	NA	14	6	14-Jun	2017	02/08/2017	05/09/2017	33	45	50	5	NA	31	70	0	178_1_11_14-Jun	0	0	0	1
178	1	13	NA	NA	14	6	14-Jun	2017	02/08/2017	05/09/2017	33	15	58	43	NA	32	70	0	178_1_13_14-Jun	0	0	0	0.8
178	3	11	NA	NA	14	6	14-Jun	2017	02/08/2017	05/09/2017	33	44	48	4	NA	34	70	0	178_3_11_14-Jun	0	0	0	0.863636363636364
178	3	13	NA	NA	14	6	14-Jun	2017	02/08/2017	05/09/2017	33	46	64	18	NA	35	70	0	178_3_13_14-Jun	0	0	0	1
178	1	11	NA	NA	22	9	22-Sep	2017	13/12/2017	NA	44	7	31	24	NA	75	70	0	178_1_11_22-Sep	0	0	0	1
178	1	13	NA	NA	22	9	22-Sep	2017	13/12/2017	NA	44	22	36	14	NA	76	70	0	178_1_13_22-Sep	0	0	0	1
178	3	13	NA	NA	22	9	22-Sep	2017	13/12/2017	NA	44	49	62	13	NA	77	70	1	178_3_13_22-Sep	1.61290322580645	2.04081632653061	0.0204081632653061	1
178	4	11	NA	NA	22	9	22-Sep	2017	13/12/2017	NA	44	5	63	58	NA	78	70	1	178_4_11_22-Sep	1.58730158730159	20	0.2	1
178	4	13	NA	NA	22	9	22-Sep	2017	13/12/2017	NA	44	12	32	20	NA	79	70	0	178_4_13_22-Sep	0	0	0	0.916666666666667
178	5	11	NA	NA	22	9	22-Sep	2017	13/12/2017	NA	44	5	60	55	NA	80	70	0	178_5_11_22-Sep	0	0	0	0.8
178	1	11	NA	NA	14	6	14-Jun	2017	02/08/2017	05/09/2017	33	45	50	5	NA	31	71	0	178_1_11_14-Jun	0	0	0	1
178	1	13	NA	NA	14	6	14-Jun	2017	02/08/2017	05/09/2017	33	15	58	43	NA	32	71	1	178_1_13_14-Jun	1.72413793103448	6.66666666666667	0.0666666666666667	0.866666666666667
178	3	11	NA	NA	14	6	14-Jun	2017	02/08/2017	05/09/2017	33	44	48	4	NA	34	71	4	178_3_11_14-Jun	8.33333333333333	9.09090909090909	0.0909090909090909	0.954545454545454
178	3	13	NA	NA	14	6	14-Jun	2017	02/08/2017	05/09/2017	33	46	64	18	NA	35	71	0	178_3_13_14-Jun	0	0	0	1
178	1	11	NA	NA	22	9	22-Sep	2017	13/12/2017	NA	44	7	31	24	NA	75	71	0	178_1_11_22-Sep	0	0	0	1
178	1	13	NA	NA	22	9	22-Sep	2017	13/12/2017	NA	44	22	36	14	NA	76	71	0	178_1_13_22-Sep	0	0	0	1
178	4	13	NA	NA	22	9	22-Sep	2017	13/12/2017	NA	44	12	32	20	NA	79	71	0	178_4_13_22-Sep	0	0	0	0.916666666666667
178	5	11	NA	NA	22	9	22-Sep	2017	13/12/2017	NA	44	5	60	55	NA	80	71	0	178_5_11_22-Sep	0	0	0	0.8
178	1	11	NA	NA	14	6	14-Jun	2017	02/08/2017	05/09/2017	33	45	50	5	NA	31	72	0	178_1_11_14-Jun	0	0	0	1
178	1	13	NA	NA	14	6	14-Jun	2017	02/08/2017	05/09/2017	33	15	58	43	NA	32	72	2	178_1_13_14-Jun	3.44827586206897	13.3333333333333	0.133333333333333	1
178	3	11	NA	NA	14	6	14-Jun	2017	02/08/2017	05/09/2017	33	44	48	4	NA	34	72	2	178_3_11_14-Jun	4.16666666666667	4.54545454545455	0.0454545454545455	1
178	3	13	NA	NA	14	6	14-Jun	2017	02/08/2017	05/09/2017	33	46	64	18	NA	35	72	0	178_3_13_14-Jun	0	0	0	1
178	1	11	NA	NA	22	9	22-Sep	2017	13/12/2017	NA	44	7	31	24	NA	75	72	0	178_1_11_22-Sep	0	0	0	1
178	1	13	NA	NA	22	9	22-Sep	2017	13/12/2017	NA	44	22	36	14	NA	76	72	0	178_1_13_22-Sep	0	0	0	1
178	4	13	NA	NA	22	9	22-Sep	2017	13/12/2017	NA	44	12	32	20	NA	79	72	0	178_4_13_22-Sep	0	0	0	0.916666666666667
178	5	11	NA	NA	22	9	22-Sep	2017	13/12/2017	NA	44	5	60	55	NA	80	72	1	178_5_11_22-Sep	1.66666666666667	20	0.2	1
178	1	11	NA	NA	14	6	14-Jun	2017	02/08/2017	05/09/2017	33	45	50	5	NA	31	73	0	178_1_11_14-Jun	0	0	0	1
178	1	13	NA	NA	14	6	14-Jun	2017	02/08/2017	05/09/2017	33	15	58	43	NA	32	73	0	178_1_13_14-Jun	0	0	0	1
178	3	11	NA	NA	14	6	14-Jun	2017	02/08/2017	05/09/2017	33	44	48	4	NA	34	73	0	178_3_11_14-Jun	0	0	0	1
178	3	13	NA	NA	14	6	14-Jun	2017	02/08/2017	05/09/2017	33	46	64	18	NA	35	73	0	178_3_13_14-Jun	0	0	0	1
178	1	11	NA	NA	22	9	22-Sep	2017	13/12/2017	NA	44	7	31	24	NA	75	73	0	178_1_11_22-Sep	0	0	0	1
178	1	13	NA	NA	22	9	22-Sep	2017	13/12/2017	NA	44	22	36	14	NA	76	73	0	178_1_13_22-Sep	0	0	0	1
178	4	13	NA	NA	22	9	22-Sep	2017	13/12/2017	NA	44	12	32	20	NA	79	73	0	178_4_13_22-Sep	0	0	0	0.916666666666667
178	1	11	NA	NA	14	6	14-Jun	2017	02/08/2017	05/09/2017	33	45	50	5	NA	31	74	0	178_1_11_14-Jun	0	0	0	1
178	1	13	NA	NA	14	6	14-Jun	2017	02/08/2017	05/09/2017	33	15	58	43	NA	32	74	0	178_1_13_14-Jun	0	0	0	1
178	3	11	NA	NA	14	6	14-Jun	2017	02/08/2017	05/09/2017	33	44	48	4	NA	34	74	0	178_3_11_14-Jun	0	0	0	1
178	3	13	NA	NA	14	6	14-Jun	2017	02/08/2017	05/09/2017	33	46	64	18	NA	35	74	0	178_3_13_14-Jun	0	0	0	1
178	1	11	NA	NA	22	9	22-Sep	2017	13/12/2017	NA	44	7	31	24	NA	75	74	0	178_1_11_22-Sep	0	0	0	1
178	1	13	NA	NA	22	9	22-Sep	2017	13/12/2017	NA	44	22	36	14	NA	76	74	0	178_1_13_22-Sep	0	0	0	1
178	4	13	NA	NA	22	9	22-Sep	2017	13/12/2017	NA	44	12	32	20	NA	79	74	1	178_4_13_22-Sep	3.125	8.33333333333333	0.0833333333333333	1
178	1	11	NA	NA	14	6	14-Jun	2017	02/08/2017	05/09/2017	33	45	50	5	NA	31	75	0	178_1_11_14-Jun	0	0	0	1
178	1	13	NA	NA	14	6	14-Jun	2017	02/08/2017	05/09/2017	33	15	58	43	NA	32	75	0	178_1_13_14-Jun	0	0	0	1
178	3	11	NA	NA	14	6	14-Jun	2017	02/08/2017	05/09/2017	33	44	48	4	NA	34	75	1	178_3_11_14-Jun	2.08333333333333	2.27272727272727	0.0227272727272727	1.02272727272727
178	3	13	NA	NA	14	6	14-Jun	2017	02/08/2017	05/09/2017	33	46	64	18	NA	35	75	0	178_3_13_14-Jun	0	0	0	1
178	1	11	NA	NA	22	9	22-Sep	2017	13/12/2017	NA	44	7	31	24	NA	75	75	0	178_1_11_22-Sep	0	0	0	1
178	1	13	NA	NA	22	9	22-Sep	2017	13/12/2017	NA	44	22	36	14	NA	76	75	0	178_1_13_22-Sep	0	0	0	1
178	4	13	NA	NA	22	9	22-Sep	2017	13/12/2017	NA	44	12	32	20	NA	79	75	0	178_4_13_22-Sep	0	0	0	1
178	1	11	NA	NA	14	6	14-Jun	2017	02/08/2017	05/09/2017	33	45	50	5	NA	31	76	0	178_1_11_14-Jun	0	0	0	1
178	1	13	NA	NA	14	6	14-Jun	2017	02/08/2017	05/09/2017	33	15	58	43	NA	32	76	0	178_1_13_14-Jun	0	0	0	1
178	3	11	NA	NA	14	6	14-Jun	2017	02/08/2017	05/09/2017	33	44	48	4	NA	34	76	0	178_3_11_14-Jun	0	0	0	1.02272727272727
178	3	13	NA	NA	14	6	14-Jun	2017	02/08/2017	05/09/2017	33	46	64	18	NA	35	76	0	178_3_13_14-Jun	0	0	0	1
178	1	11	NA	NA	22	9	22-Sep	2017	13/12/2017	NA	44	7	31	24	NA	75	76	0	178_1_11_22-Sep	0	0	0	1
178	1	13	NA	NA	22	9	22-Sep	2017	13/12/2017	NA	44	22	36	14	NA	76	76	0	178_1_13_22-Sep	0	0	0	1
178	4	13	NA	NA	22	9	22-Sep	2017	13/12/2017	NA	44	12	32	20	NA	79	76	0	178_4_13_22-Sep	0	0	0	1
178	1	11	NA	NA	14	6	14-Jun	2017	02/08/2017	05/09/2017	33	45	50	5	NA	31	77	1	178_1_11_14-Jun	2	2.22222222222222	0.0222222222222222	1.02222222222222
178	1	13	NA	NA	14	6	14-Jun	2017	02/08/2017	05/09/2017	33	15	58	43	NA	32	77	0	178_1_13_14-Jun	0	0	0	1
178	3	11	NA	NA	14	6	14-Jun	2017	02/08/2017	05/09/2017	33	44	48	4	NA	34	77	1	178_3_11_14-Jun	2.08333333333333	2.27272727272727	0.0227272727272727	1.04545454545455
178	3	13	NA	NA	14	6	14-Jun	2017	02/08/2017	05/09/2017	33	46	64	18	NA	35	77	0	178_3_13_14-Jun	0	0	0	1
178	1	11	NA	NA	22	9	22-Sep	2017	13/12/2017	NA	44	7	31	24	NA	75	77	0	178_1_11_22-Sep	0	0	0	1
178	1	13	NA	NA	22	9	22-Sep	2017	13/12/2017	NA	44	22	36	14	NA	76	77	0	178_1_13_22-Sep	0	0	0	1
178	4	13	NA	NA	22	9	22-Sep	2017	13/12/2017	NA	44	12	32	20	NA	79	77	5	178_4_13_22-Sep	15.625	41.6666666666667	0.416666666666667	1.41666666666667
178	1	13	NA	NA	14	6	14-Jun	2017	02/08/2017	05/09/2017	33	15	58	43	NA	32	78	1	178_1_13_14-Jun	1.72413793103448	6.66666666666667	0.0666666666666667	1.06666666666667
178	3	13	NA	NA	14	6	14-Jun	2017	02/08/2017	05/09/2017	33	46	64	18	NA	35	78	0	178_3_13_14-Jun	0	0	0	1
178	1	11	NA	NA	22	9	22-Sep	2017	13/12/2017	NA	44	7	31	24	NA	75	78	0	178_1_11_22-Sep	0	0	0	1
178	1	13	NA	NA	22	9	22-Sep	2017	13/12/2017	NA	44	22	36	14	NA	76	78	2	178_1_13_22-Sep	5.55555555555556	9.09090909090909	0.0909090909090909	1.09090909090909
178	4	13	NA	NA	22	9	22-Sep	2017	13/12/2017	NA	44	12	32	20	NA	79	78	3	178_4_13_22-Sep	9.375	25	0.25	1.66666666666667
178	1	13	NA	NA	14	6	14-Jun	2017	02/08/2017	05/09/2017	33	15	58	43	NA	32	79	0	178_1_13_14-Jun	0	0	0	1.06666666666667
178	3	13	NA	NA	14	6	14-Jun	2017	02/08/2017	05/09/2017	33	46	64	18	NA	35	79	0	178_3_13_14-Jun	0	0	0	1
178	1	11	NA	NA	22	9	22-Sep	2017	13/12/2017	NA	44	7	31	24	NA	75	79	0	178_1_11_22-Sep	0	0	0	1
178	4	13	NA	NA	22	9	22-Sep	2017	13/12/2017	NA	44	12	32	20	NA	79	79	2	178_4_13_22-Sep	6.25	16.6666666666667	0.166666666666667	1.83333333333333
178	1	13	NA	NA	14	6	14-Jun	2017	02/08/2017	05/09/2017	33	15	58	43	NA	32	80	0	178_1_13_14-Jun	0	0	0	1.06666666666667
178	3	13	NA	NA	14	6	14-Jun	2017	02/08/2017	05/09/2017	33	46	64	18	NA	35	80	0	178_3_13_14-Jun	0	0	0	1
178	1	11	NA	NA	22	9	22-Sep	2017	13/12/2017	NA	44	7	31	24	NA	75	80	4	178_1_11_22-Sep	12.9032258064516	57.1428571428571	0.571428571428571	1.57142857142857
178	1	13	NA	NA	14	6	14-Jun	2017	02/08/2017	05/09/2017	33	15	58	43	NA	32	81	0	178_1_13_14-Jun	0	0	0	1.06666666666667
178	3	13	NA	NA	14	6	14-Jun	2017	02/08/2017	05/09/2017	33	46	64	18	NA	35	81	0	178_3_13_14-Jun	0	0	0	1
178	1	11	NA	NA	22	9	22-Sep	2017	13/12/2017	NA	44	7	31	24	NA	75	81	2	178_1_11_22-Sep	6.45161290322581	28.5714285714286	0.285714285714286	1.85714285714286
178	1	13	NA	NA	14	6	14-Jun	2017	02/08/2017	05/09/2017	33	15	58	43	NA	32	82	1	178_1_13_14-Jun	1.72413793103448	6.66666666666667	0.0666666666666667	1.13333333333333
178	3	13	NA	NA	14	6	14-Jun	2017	02/08/2017	05/09/2017	33	46	64	18	NA	35	82	1	178_3_13_14-Jun	1.5625	2.17391304347826	0.0217391304347826	1.02173913043478
178	1	13	NA	NA	14	6	14-Jun	2017	02/08/2017	05/09/2017	33	15	58	43	NA	32	83	2	178_1_13_14-Jun	3.44827586206897	13.3333333333333	0.133333333333333	1.26666666666667
