# Supplementary material for: An ABA-GA bistable switch can account for natural variation in the variability of Arabidopsis seed germination time
Source: eLife. 2021 Jun 1;10:e59485. doi: 10.7554/eLife.59485 (PMC8169117; doi:10.7554/eLife.59485)
Supplement: Figure 2—source data 3. [file elife-59485-fig2-data3.tds]

Magic_line	Plant	Silique	Top_or_bottom	comments	Sowing.day	Sowing.month	Sowing_date	Year	Scoring.date	second.scoring	DAR	Total.germinated	Total	NonGer.at.end.of.scoring.period	comments.1	id	day	number	name	perc	perc_total_ger	germ_frac	cumgerm_frac
178	1	1	bottom	NA	19	10	19-Oct	2017	18/12/2017	NA	29	15	19	4	NA	120	1	0	178_1_1_19-Oct	0	0	0	0
178	1	1	top	NA	19	10	19-Oct	2017	18/12/2017	NA	29	18	18	0	NA	121	1	0	178_1_1_19-Oct	0	0	0	0
178	1	10	bottom	NA	19	10	19-Oct	2017	18/12/2017	NA	29	23	23	0	NA	136	1	0	178_1_10_19-Oct	0	0	0	0
178	1	10	top	NA	19	10	19-Oct	2017	18/12/2017	NA	29	19	19	0	NA	137	1	0	178_1_10_19-Oct	0	0	0	0
178	1	2	bottom	NA	19	10	19-Oct	2017	18/12/2017	NA	29	16	19	3	NA	138	1	0	178_1_2_19-Oct	0	0	0	0
178	1	2	top	NA	19	10	19-Oct	2017	18/12/2017	NA	29	10	12	2	NA	139	1	0	178_1_2_19-Oct	0	0	0	0
178	1	3	bottom	NA	19	10	19-Oct	2017	18/12/2017	NA	29	16	16	0	NA	122	1	0	178_1_3_19-Oct	0	0	0	0
178	1	3	top	NA	19	10	19-Oct	2017	18/12/2017	NA	29	8	8	0	NA	123	1	0	178_1_3_19-Oct	0	0	0	0
178	1	4	bottom	NA	19	10	19-Oct	2017	18/12/2017	NA	29	20	20	0	NA	124	1	0	178_1_4_19-Oct	0	0	0	0
178	1	4	top	NA	19	10	19-Oct	2017	18/12/2017	NA	29	7	7	0	NA	125	1	0	178_1_4_19-Oct	0	0	0	0
178	1	5	bottom	NA	19	10	19-Oct	2017	18/12/2017	NA	29	19	19	0	NA	126	1	0	178_1_5_19-Oct	0	0	0	0
178	1	5	top	NA	19	10	19-Oct	2017	18/12/2017	NA	29	14	14	0	NA	127	1	0	178_1_5_19-Oct	0	0	0	0
178	1	6	bottom	NA	19	10	19-Oct	2017	18/12/2017	NA	29	19	19	0	NA	128	1	0	178_1_6_19-Oct	0	0	0	0
178	1	6	top	NA	19	10	19-Oct	2017	18/12/2017	NA	29	10	10	0	NA	129	1	0	178_1_6_19-Oct	0	0	0	0
178	1	7	bottom	NA	19	10	19-Oct	2017	18/12/2017	NA	29	19	19	0	NA	130	1	0	178_1_7_19-Oct	0	0	0	0
178	1	7	top	NA	19	10	19-Oct	2017	18/12/2017	NA	29	15	15	0	NA	131	1	0	178_1_7_19-Oct	0	0	0	0
178	1	8	bottom	NA	19	10	19-Oct	2017	18/12/2017	NA	29	21	21	0	NA	132	1	0	178_1_8_19-Oct	0	0	0	0
178	1	8	top	NA	19	10	19-Oct	2017	18/12/2017	NA	29	22	22	0	NA	133	1	0	178_1_8_19-Oct	0	0	0	0
178	1	9	bottom	NA	19	10	19-Oct	2017	18/12/2017	NA	29	21	23	2	NA	134	1	0	178_1_9_19-Oct	0	0	0	0
178	1	9	top	NA	19	10	19-Oct	2017	18/12/2017	NA	29	13	15	2	NA	135	1	0	178_1_9_19-Oct	0	0	0	0
178	2	1	bottom	NA	19	10	19-Oct	2017	18/12/2017	NA	29	10	10	0	NA	140	1	0	178_2_1_19-Oct	0	0	0	0
178	2	1	top	NA	19	10	19-Oct	2017	18/12/2017	NA	29	13	13	0	NA	141	1	0	178_2_1_19-Oct	0	0	0	0
178	2	10	bottom	NA	19	10	19-Oct	2017	18/12/2017	NA	29	16	16	0	NA	156	1	0	178_2_10_19-Oct	0	0	0	0
178	2	10	top	NA	19	10	19-Oct	2017	18/12/2017	NA	29	22	22	0	NA	157	1	0	178_2_10_19-Oct	0	0	0	0
178	2	2	bottom	NA	19	10	19-Oct	2017	18/12/2017	NA	29	19	19	0	NA	158	1	0	178_2_2_19-Oct	0	0	0	0
178	2	2	top	NA	19	10	19-Oct	2017	18/12/2017	NA	29	20	20	0	NA	159	1	0	178_2_2_19-Oct	0	0	0	0
178	2	3	bottom	NA	19	10	19-Oct	2017	18/12/2017	NA	29	16	16	0	NA	142	1	0	178_2_3_19-Oct	0	0	0	0
178	2	3	top	NA	19	10	19-Oct	2017	18/12/2017	NA	29	16	16	0	NA	143	1	0	178_2_3_19-Oct	0	0	0	0
178	2	4	bottom	NA	19	10	19-Oct	2017	18/12/2017	NA	29	26	26	0	NA	144	1	0	178_2_4_19-Oct	0	0	0	0
178	2	4	top	NA	19	10	19-Oct	2017	18/12/2017	NA	29	16	16	0	NA	145	1	0	178_2_4_19-Oct	0	0	0	0
178	2	5	bottom	NA	19	10	19-Oct	2017	18/12/2017	NA	29	20	20	0	NA	146	1	0	178_2_5_19-Oct	0	0	0	0
178	2	5	top	NA	19	10	19-Oct	2017	18/12/2017	NA	29	8	8	0	NA	147	1	0	178_2_5_19-Oct	0	0	0	0
178	2	6	bottom	NA	19	10	19-Oct	2017	18/12/2017	NA	29	19	19	0	NA	148	1	0	178_2_6_19-Oct	0	0	0	0
178	2	6	top	NA	19	10	19-Oct	2017	18/12/2017	NA	29	24	24	0	NA	149	1	0	178_2_6_19-Oct	0	0	0	0
178	2	7	bottom	NA	19	10	19-Oct	2017	18/12/2017	NA	29	20	20	0	NA	150	1	0	178_2_7_19-Oct	0	0	0	0
178	2	7	top	NA	19	10	19-Oct	2017	18/12/2017	NA	29	21	21	0	NA	151	1	0	178_2_7_19-Oct	0	0	0	0
178	2	8	bottom	NA	19	10	19-Oct	2017	18/12/2017	NA	29	15	15	0	NA	152	1	0	178_2_8_19-Oct	0	0	0	0
178	2	8	top	NA	19	10	19-Oct	2017	18/12/2017	NA	29	17	17	0	NA	153	1	0	178_2_8_19-Oct	0	0	0	0
178	2	9	bottom	NA	19	10	19-Oct	2017	18/12/2017	NA	29	18	18	0	NA	154	1	0	178_2_9_19-Oct	0	0	0	0
178	2	9	top	NA	19	10	19-Oct	2017	18/12/2017	NA	29	19	19	0	NA	155	1	0	178_2_9_19-Oct	0	0	0	0
178	1	1	bottom	NA	19	10	19-Oct	2017	18/12/2017	NA	29	15	19	4	NA	120	2	0	178_1_1_19-Oct	0	0	0	0
178	1	1	top	NA	19	10	19-Oct	2017	18/12/2017	NA	29	18	18	0	NA	121	2	0	178_1_1_19-Oct	0	0	0	0
178	1	10	bottom	NA	19	10	19-Oct	2017	18/12/2017	NA	29	23	23	0	NA	136	2	0	178_1_10_19-Oct	0	0	0	0
178	1	10	top	NA	19	10	19-Oct	2017	18/12/2017	NA	29	19	19	0	NA	137	2	0	178_1_10_19-Oct	0	0	0	0
178	1	2	bottom	NA	19	10	19-Oct	2017	18/12/2017	NA	29	16	19	3	NA	138	2	0	178_1_2_19-Oct	0	0	0	0
178	1	2	top	NA	19	10	19-Oct	2017	18/12/2017	NA	29	10	12	2	NA	139	2	0	178_1_2_19-Oct	0	0	0	0
178	1	3	bottom	NA	19	10	19-Oct	2017	18/12/2017	NA	29	16	16	0	NA	122	2	0	178_1_3_19-Oct	0	0	0	0
178	1	3	top	NA	19	10	19-Oct	2017	18/12/2017	NA	29	8	8	0	NA	123	2	0	178_1_3_19-Oct	0	0	0	0
178	1	4	bottom	NA	19	10	19-Oct	2017	18/12/2017	NA	29	20	20	0	NA	124	2	0	178_1_4_19-Oct	0	0	0	0
178	1	4	top	NA	19	10	19-Oct	2017	18/12/2017	NA	29	7	7	0	NA	125	2	0	178_1_4_19-Oct	0	0	0	0
178	1	5	bottom	NA	19	10	19-Oct	2017	18/12/2017	NA	29	19	19	0	NA	126	2	0	178_1_5_19-Oct	0	0	0	0
178	1	5	top	NA	19	10	19-Oct	2017	18/12/2017	NA	29	14	14	0	NA	127	2	0	178_1_5_19-Oct	0	0	0	0
178	1	6	bottom	NA	19	10	19-Oct	2017	18/12/2017	NA	29	19	19	0	NA	128	2	0	178_1_6_19-Oct	0	0	0	0
178	1	6	top	NA	19	10	19-Oct	2017	18/12/2017	NA	29	10	10	0	NA	129	2	0	178_1_6_19-Oct	0	0	0	0
178	1	7	bottom	NA	19	10	19-Oct	2017	18/12/2017	NA	29	19	19	0	NA	130	2	0	178_1_7_19-Oct	0	0	0	0
178	1	7	top	NA	19	10	19-Oct	2017	18/12/2017	NA	29	15	15	0	NA	131	2	0	178_1_7_19-Oct	0	0	0	0
178	1	8	bottom	NA	19	10	19-Oct	2017	18/12/2017	NA	29	21	21	0	NA	132	2	0	178_1_8_19-Oct	0	0	0	0
178	1	8	top	NA	19	10	19-Oct	2017	18/12/2017	NA	29	22	22	0	NA	133	2	0	178_1_8_19-Oct	0	0	0	0
178	1	9	bottom	NA	19	10	19-Oct	2017	18/12/2017	NA	29	21	23	2	NA	134	2	0	178_1_9_19-Oct	0	0	0	0
178	1	9	top	NA	19	10	19-Oct	2017	18/12/2017	NA	29	13	15	2	NA	135	2	0	178_1_9_19-Oct	0	0	0	0
178	2	1	bottom	NA	19	10	19-Oct	2017	18/12/2017	NA	29	10	10	0	NA	140	2	0	178_2_1_19-Oct	0	0	0	0
178	2	1	top	NA	19	10	19-Oct	2017	18/12/2017	NA	29	13	13	0	NA	141	2	0	178_2_1_19-Oct	0	0	0	0
178	2	10	bottom	NA	19	10	19-Oct	2017	18/12/2017	NA	29	16	16	0	NA	156	2	0	178_2_10_19-Oct	0	0	0	0
178	2	10	top	NA	19	10	19-Oct	2017	18/12/2017	NA	29	22	22	0	NA	157	2	0	178_2_10_19-Oct	0	0	0	0
178	2	2	bottom	NA	19	10	19-Oct	2017	18/12/2017	NA	29	19	19	0	NA	158	2	0	178_2_2_19-Oct	0	0	0	0
178	2	2	top	NA	19	10	19-Oct	2017	18/12/2017	NA	29	20	20	0	NA	159	2	0	178_2_2_19-Oct	0	0	0	0
178	2	3	bottom	NA	19	10	19-Oct	2017	18/12/2017	NA	29	16	16	0	NA	142	2	0	178_2_3_19-Oct	0	0	0	0
178	2	3	top	NA	19	10	19-Oct	2017	18/12/2017	NA	29	16	16	0	NA	143	2	0	178_2_3_19-Oct	0	0	0	0
178	2	4	bottom	NA	19	10	19-Oct	2017	18/12/2017	NA	29	26	26	0	NA	144	2	0	178_2_4_19-Oct	0	0	0	0
178	2	4	top	NA	19	10	19-Oct	2017	18/12/2017	NA	29	16	16	0	NA	145	2	0	178_2_4_19-Oct	0	0	0	0
178	2	5	bottom	NA	19	10	19-Oct	2017	18/12/2017	NA	29	20	20	0	NA	146	2	0	178_2_5_19-Oct	0	0	0	0
178	2	5	top	NA	19	10	19-Oct	2017	18/12/2017	NA	29	8	8	0	NA	147	2	0	178_2_5_19-Oct	0	0	0	0
178	2	6	bottom	NA	19	10	19-Oct	2017	18/12/2017	NA	29	19	19	0	NA	148	2	0	178_2_6_19-Oct	0	0	0	0
178	2	6	top	NA	19	10	19-Oct	2017	18/12/2017	NA	29	24	24	0	NA	149	2	0	178_2_6_19-Oct	0	0	0	0
178	2	7	bottom	NA	19	10	19-Oct	2017	18/12/2017	NA	29	20	20	0	NA	150	2	0	178_2_7_19-Oct	0	0	0	0
178	2	7	top	NA	19	10	19-Oct	2017	18/12/2017	NA	29	21	21	0	NA	151	2	0	178_2_7_19-Oct	0	0	0	0
178	2	8	bottom	NA	19	10	19-Oct	2017	18/12/2017	NA	29	15	15	0	NA	152	2	0	178_2_8_19-Oct	0	0	0	0
178	2	8	top	NA	19	10	19-Oct	2017	18/12/2017	NA	29	17	17	0	NA	153	2	0	178_2_8_19-Oct	0	0	0	0
178	2	9	bottom	NA	19	10	19-Oct	2017	18/12/2017	NA	29	18	18	0	NA	154	2	0	178_2_9_19-Oct	0	0	0	0
178	2	9	top	NA	19	10	19-Oct	2017	18/12/2017	NA	29	19	19	0	NA	155	2	0	178_2_9_19-Oct	0	0	0	0
178	1	1	bottom	NA	19	10	19-Oct	2017	18/12/2017	NA	29	15	19	4	NA	120	3	0	178_1_1_19-Oct	0	0	0	0
178	1	1	top	NA	19	10	19-Oct	2017	18/12/2017	NA	29	18	18	0	NA	121	3	1	178_1_1_19-Oct	5.55555555555556	5.55555555555556	0.0555555555555556	0.0555555555555556
178	1	10	bottom	NA	19	10	19-Oct	2017	18/12/2017	NA	29	23	23	0	NA	136	3	4	178_1_10_19-Oct	17.3913043478261	17.3913043478261	0.173913043478261	0.173913043478261
178	1	10	top	NA	19	10	19-Oct	2017	18/12/2017	NA	29	19	19	0	NA	137	3	3	178_1_10_19-Oct	15.7894736842105	15.7894736842105	0.157894736842105	0.157894736842105
178	1	2	bottom	NA	19	10	19-Oct	2017	18/12/2017	NA	29	16	19	3	NA	138	3	0	178_1_2_19-Oct	0	0	0	0
178	1	2	top	NA	19	10	19-Oct	2017	18/12/2017	NA	29	10	12	2	NA	139	3	0	178_1_2_19-Oct	0	0	0	0
178	1	3	bottom	NA	19	10	19-Oct	2017	18/12/2017	NA	29	16	16	0	NA	122	3	9	178_1_3_19-Oct	56.25	56.25	0.5625	0.5625
178	1	3	top	NA	19	10	19-Oct	2017	18/12/2017	NA	29	8	8	0	NA	123	3	2	178_1_3_19-Oct	25	25	0.25	0.25
178	1	4	bottom	NA	19	10	19-Oct	2017	18/12/2017	NA	29	20	20	0	NA	124	3	12	178_1_4_19-Oct	60	60	0.6	0.6
178	1	4	top	NA	19	10	19-Oct	2017	18/12/2017	NA	29	7	7	0	NA	125	3	2	178_1_4_19-Oct	28.5714285714286	28.5714285714286	0.285714285714286	0.285714285714286
178	1	5	bottom	NA	19	10	19-Oct	2017	18/12/2017	NA	29	19	19	0	NA	126	3	6	178_1_5_19-Oct	31.5789473684211	31.5789473684211	0.315789473684211	0.315789473684211
178	1	5	top	NA	19	10	19-Oct	2017	18/12/2017	NA	29	14	14	0	NA	127	3	2	178_1_5_19-Oct	14.2857142857143	14.2857142857143	0.142857142857143	0.142857142857143
178	1	6	bottom	NA	19	10	19-Oct	2017	18/12/2017	NA	29	19	19	0	NA	128	3	3	178_1_6_19-Oct	15.7894736842105	15.7894736842105	0.157894736842105	0.157894736842105
178	1	6	top	NA	19	10	19-Oct	2017	18/12/2017	NA	29	10	10	0	NA	129	3	1	178_1_6_19-Oct	10	10	0.1	0.1
178	1	7	bottom	NA	19	10	19-Oct	2017	18/12/2017	NA	29	19	19	0	NA	130	3	9	178_1_7_19-Oct	47.3684210526316	47.3684210526316	0.473684210526316	0.473684210526316
178	1	7	top	NA	19	10	19-Oct	2017	18/12/2017	NA	29	15	15	0	NA	131	3	4	178_1_7_19-Oct	26.6666666666667	26.6666666666667	0.266666666666667	0.266666666666667
178	1	8	bottom	NA	19	10	19-Oct	2017	18/12/2017	NA	29	21	21	0	NA	132	3	10	178_1_8_19-Oct	47.6190476190476	47.6190476190476	0.476190476190476	0.476190476190476
178	1	8	top	NA	19	10	19-Oct	2017	18/12/2017	NA	29	22	22	0	NA	133	3	3	178_1_8_19-Oct	13.6363636363636	13.6363636363636	0.136363636363636	0.136363636363636
178	1	9	bottom	NA	19	10	19-Oct	2017	18/12/2017	NA	29	21	23	2	NA	134	3	19	178_1_9_19-Oct	82.6086956521739	90.4761904761905	0.904761904761905	0.904761904761905
178	1	9	top	NA	19	10	19-Oct	2017	18/12/2017	NA	29	13	15	2	NA	135	3	5	178_1_9_19-Oct	33.3333333333333	38.4615384615385	0.384615384615385	0.384615384615385
178	2	1	bottom	NA	19	10	19-Oct	2017	18/12/2017	NA	29	10	10	0	NA	140	3	0	178_2_1_19-Oct	0	0	0	0
178	2	1	top	NA	19	10	19-Oct	2017	18/12/2017	NA	29	13	13	0	NA	141	3	0	178_2_1_19-Oct	0	0	0	0
178	2	10	bottom	NA	19	10	19-Oct	2017	18/12/2017	NA	29	16	16	0	NA	156	3	0	178_2_10_19-Oct	0	0	0	0
178	2	10	top	NA	19	10	19-Oct	2017	18/12/2017	NA	29	22	22	0	NA	157	3	0	178_2_10_19-Oct	0	0	0	0
178	2	2	bottom	NA	19	10	19-Oct	2017	18/12/2017	NA	29	19	19	0	NA	158	3	4	178_2_2_19-Oct	21.0526315789474	21.0526315789474	0.210526315789474	0.210526315789474
178	2	2	top	NA	19	10	19-Oct	2017	18/12/2017	NA	29	20	20	0	NA	159	3	4	178_2_2_19-Oct	20	20	0.2	0.2
178	2	3	bottom	NA	19	10	19-Oct	2017	18/12/2017	NA	29	16	16	0	NA	142	3	0	178_2_3_19-Oct	0	0	0	0
178	2	3	top	NA	19	10	19-Oct	2017	18/12/2017	NA	29	16	16	0	NA	143	3	0	178_2_3_19-Oct	0	0	0	0
178	2	4	bottom	NA	19	10	19-Oct	2017	18/12/2017	NA	29	26	26	0	NA	144	3	1	178_2_4_19-Oct	3.84615384615385	3.84615384615385	0.0384615384615385	0.0384615384615385
178	2	4	top	NA	19	10	19-Oct	2017	18/12/2017	NA	29	16	16	0	NA	145	3	2	178_2_4_19-Oct	12.5	12.5	0.125	0.125
178	2	5	bottom	NA	19	10	19-Oct	2017	18/12/2017	NA	29	20	20	0	NA	146	3	2	178_2_5_19-Oct	10	10	0.1	0.1
178	2	5	top	NA	19	10	19-Oct	2017	18/12/2017	NA	29	8	8	0	NA	147	3	0	178_2_5_19-Oct	0	0	0	0
178	2	6	bottom	NA	19	10	19-Oct	2017	18/12/2017	NA	29	19	19	0	NA	148	3	0	178_2_6_19-Oct	0	0	0	0
178	2	6	top	NA	19	10	19-Oct	2017	18/12/2017	NA	29	24	24	0	NA	149	3	0	178_2_6_19-Oct	0	0	0	0
178	2	7	bottom	NA	19	10	19-Oct	2017	18/12/2017	NA	29	20	20	0	NA	150	3	2	178_2_7_19-Oct	10	10	0.1	0.1
178	2	7	top	NA	19	10	19-Oct	2017	18/12/2017	NA	29	21	21	0	NA	151	3	3	178_2_7_19-Oct	14.2857142857143	14.2857142857143	0.142857142857143	0.142857142857143
178	2	8	bottom	NA	19	10	19-Oct	2017	18/12/2017	NA	29	15	15	0	NA	152	3	0	178_2_8_19-Oct	0	0	0	0
178	2	8	top	NA	19	10	19-Oct	2017	18/12/2017	NA	29	17	17	0	NA	153	3	1	178_2_8_19-Oct	5.88235294117647	5.88235294117647	0.0588235294117647	0.0588235294117647
178	2	9	bottom	NA	19	10	19-Oct	2017	18/12/2017	NA	29	18	18	0	NA	154	3	0	178_2_9_19-Oct	0	0	0	0
178	2	9	top	NA	19	10	19-Oct	2017	18/12/2017	NA	29	19	19	0	NA	155	3	0	178_2_9_19-Oct	0	0	0	0
178	1	1	bottom	NA	19	10	19-Oct	2017	18/12/2017	NA	29	15	19	4	NA	120	4	9	178_1_1_19-Oct	47.3684210526316	60	0.6	0.6
178	1	1	top	NA	19	10	19-Oct	2017	18/12/2017	NA	29	18	18	0	NA	121	4	8	178_1_1_19-Oct	44.4444444444444	44.4444444444444	0.444444444444444	0.5
178	1	10	bottom	NA	19	10	19-Oct	2017	18/12/2017	NA	29	23	23	0	NA	136	4	17	178_1_10_19-Oct	73.9130434782609	73.9130434782609	0.739130434782609	0.91304347826087
178	1	10	top	NA	19	10	19-Oct	2017	18/12/2017	NA	29	19	19	0	NA	137	4	14	178_1_10_19-Oct	73.6842105263158	73.6842105263158	0.736842105263158	0.894736842105263
178	1	2	bottom	NA	19	10	19-Oct	2017	18/12/2017	NA	29	16	19	3	NA	138	4	0	178_1_2_19-Oct	0	0	0	0
178	1	2	top	NA	19	10	19-Oct	2017	18/12/2017	NA	29	10	12	2	NA	139	4	0	178_1_2_19-Oct	0	0	0	0
178	1	3	bottom	NA	19	10	19-Oct	2017	18/12/2017	NA	29	16	16	0	NA	122	4	4	178_1_3_19-Oct	25	25	0.25	0.8125
178	1	3	top	NA	19	10	19-Oct	2017	18/12/2017	NA	29	8	8	0	NA	123	4	3	178_1_3_19-Oct	37.5	37.5	0.375	0.625
178	1	4	bottom	NA	19	10	19-Oct	2017	18/12/2017	NA	29	20	20	0	NA	124	4	8	178_1_4_19-Oct	40	40	0.4	1
178	1	4	top	NA	19	10	19-Oct	2017	18/12/2017	NA	29	7	7	0	NA	125	4	3	178_1_4_19-Oct	42.8571428571429	42.8571428571429	0.428571428571429	0.714285714285714
178	1	5	bottom	NA	19	10	19-Oct	2017	18/12/2017	NA	29	19	19	0	NA	126	4	8	178_1_5_19-Oct	42.1052631578947	42.1052631578947	0.421052631578947	0.736842105263158
178	1	5	top	NA	19	10	19-Oct	2017	18/12/2017	NA	29	14	14	0	NA	127	4	9	178_1_5_19-Oct	64.2857142857143	64.2857142857143	0.642857142857143	0.785714285714286
178	1	6	bottom	NA	19	10	19-Oct	2017	18/12/2017	NA	29	19	19	0	NA	128	4	9	178_1_6_19-Oct	47.3684210526316	47.3684210526316	0.473684210526316	0.631578947368421
178	1	6	top	NA	19	10	19-Oct	2017	18/12/2017	NA	29	10	10	0	NA	129	4	1	178_1_6_19-Oct	10	10	0.1	0.2
178	1	7	bottom	NA	19	10	19-Oct	2017	18/12/2017	NA	29	19	19	0	NA	130	4	3	178_1_7_19-Oct	15.7894736842105	15.7894736842105	0.157894736842105	0.631578947368421
178	1	7	top	NA	19	10	19-Oct	2017	18/12/2017	NA	29	15	15	0	NA	131	4	5	178_1_7_19-Oct	33.3333333333333	33.3333333333333	0.333333333333333	0.6
178	1	8	bottom	NA	19	10	19-Oct	2017	18/12/2017	NA	29	21	21	0	NA	132	4	10	178_1_8_19-Oct	47.6190476190476	47.6190476190476	0.476190476190476	0.952380952380952
178	1	8	top	NA	19	10	19-Oct	2017	18/12/2017	NA	29	22	22	0	NA	133	4	14	178_1_8_19-Oct	63.6363636363636	63.6363636363636	0.636363636363636	0.772727272727273
178	1	9	bottom	NA	19	10	19-Oct	2017	18/12/2017	NA	29	21	23	2	NA	134	4	2	178_1_9_19-Oct	8.69565217391304	9.52380952380952	0.0952380952380952	1
178	1	9	top	NA	19	10	19-Oct	2017	18/12/2017	NA	29	13	15	2	NA	135	4	3	178_1_9_19-Oct	20	23.0769230769231	0.230769230769231	0.615384615384615
178	2	1	bottom	NA	19	10	19-Oct	2017	18/12/2017	NA	29	10	10	0	NA	140	4	0	178_2_1_19-Oct	0	0	0	0
178	2	1	top	NA	19	10	19-Oct	2017	18/12/2017	NA	29	13	13	0	NA	141	4	1	178_2_1_19-Oct	7.69230769230769	7.69230769230769	0.0769230769230769	0.0769230769230769
178	2	10	bottom	NA	19	10	19-Oct	2017	18/12/2017	NA	29	16	16	0	NA	156	4	0	178_2_10_19-Oct	0	0	0	0
178	2	10	top	NA	19	10	19-Oct	2017	18/12/2017	NA	29	22	22	0	NA	157	4	6	178_2_10_19-Oct	27.2727272727273	27.2727272727273	0.272727272727273	0.272727272727273
178	2	2	bottom	NA	19	10	19-Oct	2017	18/12/2017	NA	29	19	19	0	NA	158	4	5	178_2_2_19-Oct	26.3157894736842	26.3157894736842	0.263157894736842	0.473684210526316
178	2	2	top	NA	19	10	19-Oct	2017	18/12/2017	NA	29	20	20	0	NA	159	4	12	178_2_2_19-Oct	60	60	0.6	0.8
178	2	3	bottom	NA	19	10	19-Oct	2017	18/12/2017	NA	29	16	16	0	NA	142	4	2	178_2_3_19-Oct	12.5	12.5	0.125	0.125
178	2	3	top	NA	19	10	19-Oct	2017	18/12/2017	NA	29	16	16	0	NA	143	4	2	178_2_3_19-Oct	12.5	12.5	0.125	0.125
178	2	4	bottom	NA	19	10	19-Oct	2017	18/12/2017	NA	29	26	26	0	NA	144	4	2	178_2_4_19-Oct	7.69230769230769	7.69230769230769	0.0769230769230769	0.115384615384615
178	2	4	top	NA	19	10	19-Oct	2017	18/12/2017	NA	29	16	16	0	NA	145	4	5	178_2_4_19-Oct	31.25	31.25	0.3125	0.4375
178	2	5	bottom	NA	19	10	19-Oct	2017	18/12/2017	NA	29	20	20	0	NA	146	4	6	178_2_5_19-Oct	30	30	0.3	0.4
178	2	5	top	NA	19	10	19-Oct	2017	18/12/2017	NA	29	8	8	0	NA	147	4	5	178_2_5_19-Oct	62.5	62.5	0.625	0.625
178	2	6	bottom	NA	19	10	19-Oct	2017	18/12/2017	NA	29	19	19	0	NA	148	4	4	178_2_6_19-Oct	21.0526315789474	21.0526315789474	0.210526315789474	0.210526315789474
178	2	6	top	NA	19	10	19-Oct	2017	18/12/2017	NA	29	24	24	0	NA	149	4	8	178_2_6_19-Oct	33.3333333333333	33.3333333333333	0.333333333333333	0.333333333333333
178	2	7	bottom	NA	19	10	19-Oct	2017	18/12/2017	NA	29	20	20	0	NA	150	4	14	178_2_7_19-Oct	70	70	0.7	0.8
178	2	7	top	NA	19	10	19-Oct	2017	18/12/2017	NA	29	21	21	0	NA	151	4	5	178_2_7_19-Oct	23.8095238095238	23.8095238095238	0.238095238095238	0.380952380952381
178	2	8	bottom	NA	19	10	19-Oct	2017	18/12/2017	NA	29	15	15	0	NA	152	4	2	178_2_8_19-Oct	13.3333333333333	13.3333333333333	0.133333333333333	0.133333333333333
178	2	8	top	NA	19	10	19-Oct	2017	18/12/2017	NA	29	17	17	0	NA	153	4	6	178_2_8_19-Oct	35.2941176470588	35.2941176470588	0.352941176470588	0.411764705882353
178	2	9	bottom	NA	19	10	19-Oct	2017	18/12/2017	NA	29	18	18	0	NA	154	4	2	178_2_9_19-Oct	11.1111111111111	11.1111111111111	0.111111111111111	0.111111111111111
178	2	9	top	NA	19	10	19-Oct	2017	18/12/2017	NA	29	19	19	0	NA	155	4	6	178_2_9_19-Oct	31.5789473684211	31.5789473684211	0.315789473684211	0.315789473684211
178	1	1	bottom	NA	19	10	19-Oct	2017	18/12/2017	NA	29	15	19	4	NA	120	5	4	178_1_1_19-Oct	21.0526315789474	26.6666666666667	0.266666666666667	0.866666666666667
178	1	1	top	NA	19	10	19-Oct	2017	18/12/2017	NA	29	18	18	0	NA	121	5	6	178_1_1_19-Oct	33.3333333333333	33.3333333333333	0.333333333333333	0.833333333333333
178	1	10	bottom	NA	19	10	19-Oct	2017	18/12/2017	NA	29	23	23	0	NA	136	5	0	178_1_10_19-Oct	0	0	0	0.91304347826087
178	1	10	top	NA	19	10	19-Oct	2017	18/12/2017	NA	29	19	19	0	NA	137	5	1	178_1_10_19-Oct	5.26315789473684	5.26315789473684	0.0526315789473684	0.947368421052632
178	1	2	bottom	NA	19	10	19-Oct	2017	18/12/2017	NA	29	16	19	3	NA	138	5	4	178_1_2_19-Oct	21.0526315789474	25	0.25	0.25
178	1	2	top	NA	19	10	19-Oct	2017	18/12/2017	NA	29	10	12	2	NA	139	5	2	178_1_2_19-Oct	16.6666666666667	20	0.2	0.2
178	1	3	bottom	NA	19	10	19-Oct	2017	18/12/2017	NA	29	16	16	0	NA	122	5	0	178_1_3_19-Oct	0	0	0	0.8125
178	1	3	top	NA	19	10	19-Oct	2017	18/12/2017	NA	29	8	8	0	NA	123	5	1	178_1_3_19-Oct	12.5	12.5	0.125	0.75
178	1	4	bottom	NA	19	10	19-Oct	2017	18/12/2017	NA	29	20	20	0	NA	124	5	0	178_1_4_19-Oct	0	0	0	1
178	1	4	top	NA	19	10	19-Oct	2017	18/12/2017	NA	29	7	7	0	NA	125	5	1	178_1_4_19-Oct	14.2857142857143	14.2857142857143	0.142857142857143	0.857142857142857
178	1	5	bottom	NA	19	10	19-Oct	2017	18/12/2017	NA	29	19	19	0	NA	126	5	5	178_1_5_19-Oct	26.3157894736842	26.3157894736842	0.263157894736842	1
178	1	5	top	NA	19	10	19-Oct	2017	18/12/2017	NA	29	14	14	0	NA	127	5	2	178_1_5_19-Oct	14.2857142857143	14.2857142857143	0.142857142857143	0.928571428571429
178	1	6	bottom	NA	19	10	19-Oct	2017	18/12/2017	NA	29	19	19	0	NA	128	5	2	178_1_6_19-Oct	10.5263157894737	10.5263157894737	0.105263157894737	0.736842105263158
178	1	6	top	NA	19	10	19-Oct	2017	18/12/2017	NA	29	10	10	0	NA	129	5	2	178_1_6_19-Oct	20	20	0.2	0.4
178	1	7	bottom	NA	19	10	19-Oct	2017	18/12/2017	NA	29	19	19	0	NA	130	5	3	178_1_7_19-Oct	15.7894736842105	15.7894736842105	0.157894736842105	0.789473684210526
178	1	7	top	NA	19	10	19-Oct	2017	18/12/2017	NA	29	15	15	0	NA	131	5	3	178_1_7_19-Oct	20	20	0.2	0.8
178	1	8	bottom	NA	19	10	19-Oct	2017	18/12/2017	NA	29	21	21	0	NA	132	5	0	178_1_8_19-Oct	0	0	0	0.952380952380952
178	1	8	top	NA	19	10	19-Oct	2017	18/12/2017	NA	29	22	22	0	NA	133	5	1	178_1_8_19-Oct	4.54545454545455	4.54545454545455	0.0454545454545455	0.818181818181818
178	1	9	bottom	NA	19	10	19-Oct	2017	18/12/2017	NA	29	21	23	2	NA	134	5	0	178_1_9_19-Oct	0	0	0	1
178	1	9	top	NA	19	10	19-Oct	2017	18/12/2017	NA	29	13	15	2	NA	135	5	4	178_1_9_19-Oct	26.6666666666667	30.7692307692308	0.307692307692308	0.923076923076923
178	2	1	bottom	NA	19	10	19-Oct	2017	18/12/2017	NA	29	10	10	0	NA	140	5	0	178_2_1_19-Oct	0	0	0	0
178	2	1	top	NA	19	10	19-Oct	2017	18/12/2017	NA	29	13	13	0	NA	141	5	2	178_2_1_19-Oct	15.3846153846154	15.3846153846154	0.153846153846154	0.230769230769231
178	2	10	bottom	NA	19	10	19-Oct	2017	18/12/2017	NA	29	16	16	0	NA	156	5	3	178_2_10_19-Oct	18.75	18.75	0.1875	0.1875
178	2	10	top	NA	19	10	19-Oct	2017	18/12/2017	NA	29	22	22	0	NA	157	5	5	178_2_10_19-Oct	22.7272727272727	22.7272727272727	0.227272727272727	0.5
178	2	2	bottom	NA	19	10	19-Oct	2017	18/12/2017	NA	29	19	19	0	NA	158	5	7	178_2_2_19-Oct	36.8421052631579	36.8421052631579	0.368421052631579	0.842105263157895
178	2	2	top	NA	19	10	19-Oct	2017	18/12/2017	NA	29	20	20	0	NA	159	5	2	178_2_2_19-Oct	10	10	0.1	0.9
178	2	3	bottom	NA	19	10	19-Oct	2017	18/12/2017	NA	29	16	16	0	NA	142	5	0	178_2_3_19-Oct	0	0	0	0.125
178	2	3	top	NA	19	10	19-Oct	2017	18/12/2017	NA	29	16	16	0	NA	143	5	1	178_2_3_19-Oct	6.25	6.25	0.0625	0.1875
178	2	4	bottom	NA	19	10	19-Oct	2017	18/12/2017	NA	29	26	26	0	NA	144	5	1	178_2_4_19-Oct	3.84615384615385	3.84615384615385	0.0384615384615385	0.153846153846154
178	2	4	top	NA	19	10	19-Oct	2017	18/12/2017	NA	29	16	16	0	NA	145	5	4	178_2_4_19-Oct	25	25	0.25	0.6875
178	2	5	bottom	NA	19	10	19-Oct	2017	18/12/2017	NA	29	20	20	0	NA	146	5	10	178_2_5_19-Oct	50	50	0.5	0.9
178	2	5	top	NA	19	10	19-Oct	2017	18/12/2017	NA	29	8	8	0	NA	147	5	2	178_2_5_19-Oct	25	25	0.25	0.875
178	2	6	bottom	NA	19	10	19-Oct	2017	18/12/2017	NA	29	19	19	0	NA	148	5	3	178_2_6_19-Oct	15.7894736842105	15.7894736842105	0.157894736842105	0.368421052631579
178	2	6	top	NA	19	10	19-Oct	2017	18/12/2017	NA	29	24	24	0	NA	149	5	8	178_2_6_19-Oct	33.3333333333333	33.3333333333333	0.333333333333333	0.666666666666667
178	2	7	bottom	NA	19	10	19-Oct	2017	18/12/2017	NA	29	20	20	0	NA	150	5	4	178_2_7_19-Oct	20	20	0.2	1
178	2	7	top	NA	19	10	19-Oct	2017	18/12/2017	NA	29	21	21	0	NA	151	5	9	178_2_7_19-Oct	42.8571428571429	42.8571428571429	0.428571428571429	0.80952380952381
178	2	8	bottom	NA	19	10	19-Oct	2017	18/12/2017	NA	29	15	15	0	NA	152	5	4	178_2_8_19-Oct	26.6666666666667	26.6666666666667	0.266666666666667	0.4
178	2	8	top	NA	19	10	19-Oct	2017	18/12/2017	NA	29	17	17	0	NA	153	5	7	178_2_8_19-Oct	41.1764705882353	41.1764705882353	0.411764705882353	0.823529411764706
178	2	9	bottom	NA	19	10	19-Oct	2017	18/12/2017	NA	29	18	18	0	NA	154	5	0	178_2_9_19-Oct	0	0	0	0.111111111111111
178	2	9	top	NA	19	10	19-Oct	2017	18/12/2017	NA	29	19	19	0	NA	155	5	5	178_2_9_19-Oct	26.3157894736842	26.3157894736842	0.263157894736842	0.578947368421053
178	1	1	bottom	NA	19	10	19-Oct	2017	18/12/2017	NA	29	15	19	4	NA	120	6	1	178_1_1_19-Oct	5.26315789473684	6.66666666666667	0.0666666666666667	0.933333333333333
178	1	1	top	NA	19	10	19-Oct	2017	18/12/2017	NA	29	18	18	0	NA	121	6	2	178_1_1_19-Oct	11.1111111111111	11.1111111111111	0.111111111111111	0.944444444444444
178	1	10	bottom	NA	19	10	19-Oct	2017	18/12/2017	NA	29	23	23	0	NA	136	6	1	178_1_10_19-Oct	4.34782608695652	4.34782608695652	0.0434782608695652	0.956521739130435
178	1	10	top	NA	19	10	19-Oct	2017	18/12/2017	NA	29	19	19	0	NA	137	6	0	178_1_10_19-Oct	0	0	0	0.947368421052632
178	1	2	bottom	NA	19	10	19-Oct	2017	18/12/2017	NA	29	16	19	3	NA	138	6	1	178_1_2_19-Oct	5.26315789473684	6.25	0.0625	0.3125
178	1	2	top	NA	19	10	19-Oct	2017	18/12/2017	NA	29	10	12	2	NA	139	6	0	178_1_2_19-Oct	0	0	0	0.2
178	1	3	bottom	NA	19	10	19-Oct	2017	18/12/2017	NA	29	16	16	0	NA	122	6	0	178_1_3_19-Oct	0	0	0	0.8125
178	1	3	top	NA	19	10	19-Oct	2017	18/12/2017	NA	29	8	8	0	NA	123	6	0	178_1_3_19-Oct	0	0	0	0.75
178	1	4	bottom	NA	19	10	19-Oct	2017	18/12/2017	NA	29	20	20	0	NA	124	6	0	178_1_4_19-Oct	0	0	0	1
178	1	4	top	NA	19	10	19-Oct	2017	18/12/2017	NA	29	7	7	0	NA	125	6	1	178_1_4_19-Oct	14.2857142857143	14.2857142857143	0.142857142857143	1
178	1	5	bottom	NA	19	10	19-Oct	2017	18/12/2017	NA	29	19	19	0	NA	126	6	0	178_1_5_19-Oct	0	0	0	1
178	1	5	top	NA	19	10	19-Oct	2017	18/12/2017	NA	29	14	14	0	NA	127	6	1	178_1_5_19-Oct	7.14285714285714	7.14285714285714	0.0714285714285714	1
178	1	6	bottom	NA	19	10	19-Oct	2017	18/12/2017	NA	29	19	19	0	NA	128	6	2	178_1_6_19-Oct	10.5263157894737	10.5263157894737	0.105263157894737	0.842105263157895
178	1	6	top	NA	19	10	19-Oct	2017	18/12/2017	NA	29	10	10	0	NA	129	6	1	178_1_6_19-Oct	10	10	0.1	0.5
178	1	7	bottom	NA	19	10	19-Oct	2017	18/12/2017	NA	29	19	19	0	NA	130	6	0	178_1_7_19-Oct	0	0	0	0.789473684210526
178	1	7	top	NA	19	10	19-Oct	2017	18/12/2017	NA	29	15	15	0	NA	131	6	3	178_1_7_19-Oct	20	20	0.2	1
178	1	8	bottom	NA	19	10	19-Oct	2017	18/12/2017	NA	29	21	21	0	NA	132	6	1	178_1_8_19-Oct	4.76190476190476	4.76190476190476	0.0476190476190476	1
178	1	8	top	NA	19	10	19-Oct	2017	18/12/2017	NA	29	22	22	0	NA	133	6	2	178_1_8_19-Oct	9.09090909090909	9.09090909090909	0.0909090909090909	0.909090909090909
178	1	9	bottom	NA	19	10	19-Oct	2017	18/12/2017	NA	29	21	23	2	NA	134	6	0	178_1_9_19-Oct	0	0	0	1
178	1	9	top	NA	19	10	19-Oct	2017	18/12/2017	NA	29	13	15	2	NA	135	6	0	178_1_9_19-Oct	0	0	0	0.923076923076923
178	2	1	bottom	NA	19	10	19-Oct	2017	18/12/2017	NA	29	10	10	0	NA	140	6	0	178_2_1_19-Oct	0	0	0	0
178	2	1	top	NA	19	10	19-Oct	2017	18/12/2017	NA	29	13	13	0	NA	141	6	1	178_2_1_19-Oct	7.69230769230769	7.69230769230769	0.0769230769230769	0.307692307692308
178	2	10	bottom	NA	19	10	19-Oct	2017	18/12/2017	NA	29	16	16	0	NA	156	6	0	178_2_10_19-Oct	0	0	0	0.1875
178	2	10	top	NA	19	10	19-Oct	2017	18/12/2017	NA	29	22	22	0	NA	157	6	7	178_2_10_19-Oct	31.8181818181818	31.8181818181818	0.318181818181818	0.818181818181818
178	2	2	bottom	NA	19	10	19-Oct	2017	18/12/2017	NA	29	19	19	0	NA	158	6	0	178_2_2_19-Oct	0	0	0	0.842105263157895
178	2	2	top	NA	19	10	19-Oct	2017	18/12/2017	NA	29	20	20	0	NA	159	6	2	178_2_2_19-Oct	10	10	0.1	1
178	2	3	bottom	NA	19	10	19-Oct	2017	18/12/2017	NA	29	16	16	0	NA	142	6	1	178_2_3_19-Oct	6.25	6.25	0.0625	0.1875
178	2	3	top	NA	19	10	19-Oct	2017	18/12/2017	NA	29	16	16	0	NA	143	6	1	178_2_3_19-Oct	6.25	6.25	0.0625	0.25
178	2	4	bottom	NA	19	10	19-Oct	2017	18/12/2017	NA	29	26	26	0	NA	144	6	2	178_2_4_19-Oct	7.69230769230769	7.69230769230769	0.0769230769230769	0.230769230769231
178	2	4	top	NA	19	10	19-Oct	2017	18/12/2017	NA	29	16	16	0	NA	145	6	2	178_2_4_19-Oct	12.5	12.5	0.125	0.8125
178	2	5	bottom	NA	19	10	19-Oct	2017	18/12/2017	NA	29	20	20	0	NA	146	6	2	178_2_5_19-Oct	10	10	0.1	1
178	2	5	top	NA	19	10	19-Oct	2017	18/12/2017	NA	29	8	8	0	NA	147	6	0	178_2_5_19-Oct	0	0	0	0.875
178	2	6	bottom	NA	19	10	19-Oct	2017	18/12/2017	NA	29	19	19	0	NA	148	6	2	178_2_6_19-Oct	10.5263157894737	10.5263157894737	0.105263157894737	0.473684210526316
178	2	6	top	NA	19	10	19-Oct	2017	18/12/2017	NA	29	24	24	0	NA	149	6	5	178_2_6_19-Oct	20.8333333333333	20.8333333333333	0.208333333333333	0.875
178	2	7	bottom	NA	19	10	19-Oct	2017	18/12/2017	NA	29	20	20	0	NA	150	6	0	178_2_7_19-Oct	0	0	0	1
178	2	7	top	NA	19	10	19-Oct	2017	18/12/2017	NA	29	21	21	0	NA	151	6	3	178_2_7_19-Oct	14.2857142857143	14.2857142857143	0.142857142857143	0.952380952380952
178	2	8	bottom	NA	19	10	19-Oct	2017	18/12/2017	NA	29	15	15	0	NA	152	6	4	178_2_8_19-Oct	26.6666666666667	26.6666666666667	0.266666666666667	0.666666666666667
178	2	8	top	NA	19	10	19-Oct	2017	18/12/2017	NA	29	17	17	0	NA	153	6	3	178_2_8_19-Oct	17.6470588235294	17.6470588235294	0.176470588235294	1
178	2	9	bottom	NA	19	10	19-Oct	2017	18/12/2017	NA	29	18	18	0	NA	154	6	3	178_2_9_19-Oct	16.6666666666667	16.6666666666667	0.166666666666667	0.277777777777778
178	2	9	top	NA	19	10	19-Oct	2017	18/12/2017	NA	29	19	19	0	NA	155	6	3	178_2_9_19-Oct	15.7894736842105	15.7894736842105	0.157894736842105	0.736842105263158
178	1	1	bottom	NA	19	10	19-Oct	2017	18/12/2017	NA	29	15	19	4	NA	120	7	1	178_1_1_19-Oct	5.26315789473684	6.66666666666667	0.0666666666666667	1
178	1	1	top	NA	19	10	19-Oct	2017	18/12/2017	NA	29	18	18	0	NA	121	7	1	178_1_1_19-Oct	5.55555555555556	5.55555555555556	0.0555555555555556	1
178	1	10	bottom	NA	19	10	19-Oct	2017	18/12/2017	NA	29	23	23	0	NA	136	7	0	178_1_10_19-Oct	0	0	0	0.956521739130435
178	1	10	top	NA	19	10	19-Oct	2017	18/12/2017	NA	29	19	19	0	NA	137	7	0	178_1_10_19-Oct	0	0	0	0.947368421052632
178	1	2	bottom	NA	19	10	19-Oct	2017	18/12/2017	NA	29	16	19	3	NA	138	7	2	178_1_2_19-Oct	10.5263157894737	12.5	0.125	0.4375
178	1	2	top	NA	19	10	19-Oct	2017	18/12/2017	NA	29	10	12	2	NA	139	7	0	178_1_2_19-Oct	0	0	0	0.2
178	1	3	bottom	NA	19	10	19-Oct	2017	18/12/2017	NA	29	16	16	0	NA	122	7	0	178_1_3_19-Oct	0	0	0	0.8125
178	1	3	top	NA	19	10	19-Oct	2017	18/12/2017	NA	29	8	8	0	NA	123	7	1	178_1_3_19-Oct	12.5	12.5	0.125	0.875
178	1	4	bottom	NA	19	10	19-Oct	2017	18/12/2017	NA	29	20	20	0	NA	124	7	0	178_1_4_19-Oct	0	0	0	1
178	1	4	top	NA	19	10	19-Oct	2017	18/12/2017	NA	29	7	7	0	NA	125	7	0	178_1_4_19-Oct	0	0	0	1
178	1	5	bottom	NA	19	10	19-Oct	2017	18/12/2017	NA	29	19	19	0	NA	126	7	0	178_1_5_19-Oct	0	0	0	1
178	1	5	top	NA	19	10	19-Oct	2017	18/12/2017	NA	29	14	14	0	NA	127	7	0	178_1_5_19-Oct	0	0	0	1
178	1	6	bottom	NA	19	10	19-Oct	2017	18/12/2017	NA	29	19	19	0	NA	128	7	1	178_1_6_19-Oct	5.26315789473684	5.26315789473684	0.0526315789473684	0.894736842105263
178	1	6	top	NA	19	10	19-Oct	2017	18/12/2017	NA	29	10	10	0	NA	129	7	1	178_1_6_19-Oct	10	10	0.1	0.6
178	1	7	bottom	NA	19	10	19-Oct	2017	18/12/2017	NA	29	19	19	0	NA	130	7	3	178_1_7_19-Oct	15.7894736842105	15.7894736842105	0.157894736842105	0.947368421052632
178	1	7	top	NA	19	10	19-Oct	2017	18/12/2017	NA	29	15	15	0	NA	131	7	0	178_1_7_19-Oct	0	0	0	1
178	1	8	bottom	NA	19	10	19-Oct	2017	18/12/2017	NA	29	21	21	0	NA	132	7	0	178_1_8_19-Oct	0	0	0	1
178	1	8	top	NA	19	10	19-Oct	2017	18/12/2017	NA	29	22	22	0	NA	133	7	1	178_1_8_19-Oct	4.54545454545455	4.54545454545455	0.0454545454545455	0.954545454545455
178	1	9	bottom	NA	19	10	19-Oct	2017	18/12/2017	NA	29	21	23	2	NA	134	7	0	178_1_9_19-Oct	0	0	0	1
178	1	9	top	NA	19	10	19-Oct	2017	18/12/2017	NA	29	13	15	2	NA	135	7	1	178_1_9_19-Oct	6.66666666666667	7.69230769230769	0.0769230769230769	1
178	2	1	bottom	NA	19	10	19-Oct	2017	18/12/2017	NA	29	10	10	0	NA	140	7	0	178_2_1_19-Oct	0	0	0	0
178	2	1	top	NA	19	10	19-Oct	2017	18/12/2017	NA	29	13	13	0	NA	141	7	3	178_2_1_19-Oct	23.0769230769231	23.0769230769231	0.230769230769231	0.538461538461539
178	2	10	bottom	NA	19	10	19-Oct	2017	18/12/2017	NA	29	16	16	0	NA	156	7	0	178_2_10_19-Oct	0	0	0	0.1875
178	2	10	top	NA	19	10	19-Oct	2017	18/12/2017	NA	29	22	22	0	NA	157	7	2	178_2_10_19-Oct	9.09090909090909	9.09090909090909	0.0909090909090909	0.909090909090909
178	2	2	bottom	NA	19	10	19-Oct	2017	18/12/2017	NA	29	19	19	0	NA	158	7	0	178_2_2_19-Oct	0	0	0	0.842105263157895
178	2	2	top	NA	19	10	19-Oct	2017	18/12/2017	NA	29	20	20	0	NA	159	7	0	178_2_2_19-Oct	0	0	0	1
178	2	3	bottom	NA	19	10	19-Oct	2017	18/12/2017	NA	29	16	16	0	NA	142	7	0	178_2_3_19-Oct	0	0	0	0.1875
178	2	3	top	NA	19	10	19-Oct	2017	18/12/2017	NA	29	16	16	0	NA	143	7	2	178_2_3_19-Oct	12.5	12.5	0.125	0.375
178	2	4	bottom	NA	19	10	19-Oct	2017	18/12/2017	NA	29	26	26	0	NA	144	7	0	178_2_4_19-Oct	0	0	0	0.230769230769231
178	2	4	top	NA	19	10	19-Oct	2017	18/12/2017	NA	29	16	16	0	NA	145	7	0	178_2_4_19-Oct	0	0	0	0.8125
178	2	5	bottom	NA	19	10	19-Oct	2017	18/12/2017	NA	29	20	20	0	NA	146	7	0	178_2_5_19-Oct	0	0	0	1
178	2	5	top	NA	19	10	19-Oct	2017	18/12/2017	NA	29	8	8	0	NA	147	7	1	178_2_5_19-Oct	12.5	12.5	0.125	1
178	2	6	bottom	NA	19	10	19-Oct	2017	18/12/2017	NA	29	19	19	0	NA	148	7	1	178_2_6_19-Oct	5.26315789473684	5.26315789473684	0.0526315789473684	0.526315789473684
178	2	6	top	NA	19	10	19-Oct	2017	18/12/2017	NA	29	24	24	0	NA	149	7	2	178_2_6_19-Oct	8.33333333333333	8.33333333333333	0.0833333333333333	0.958333333333333
178	2	7	bottom	NA	19	10	19-Oct	2017	18/12/2017	NA	29	20	20	0	NA	150	7	0	178_2_7_19-Oct	0	0	0	1
178	2	7	top	NA	19	10	19-Oct	2017	18/12/2017	NA	29	21	21	0	NA	151	7	0	178_2_7_19-Oct	0	0	0	0.952380952380952
178	2	8	bottom	NA	19	10	19-Oct	2017	18/12/2017	NA	29	15	15	0	NA	152	7	0	178_2_8_19-Oct	0	0	0	0.666666666666667
178	2	8	top	NA	19	10	19-Oct	2017	18/12/2017	NA	29	17	17	0	NA	153	7	0	178_2_8_19-Oct	0	0	0	1
178	2	9	bottom	NA	19	10	19-Oct	2017	18/12/2017	NA	29	18	18	0	NA	154	7	0	178_2_9_19-Oct	0	0	0	0.277777777777778
178	2	9	top	NA	19	10	19-Oct	2017	18/12/2017	NA	29	19	19	0	NA	155	7	2	178_2_9_19-Oct	10.5263157894737	10.5263157894737	0.105263157894737	0.842105263157895
178	1	1	bottom	NA	19	10	19-Oct	2017	18/12/2017	NA	29	15	19	4	NA	120	8	0	178_1_1_19-Oct	0	0	0	1
178	1	1	top	NA	19	10	19-Oct	2017	18/12/2017	NA	29	18	18	0	NA	121	8	0	178_1_1_19-Oct	0	0	0	1
178	1	10	bottom	NA	19	10	19-Oct	2017	18/12/2017	NA	29	23	23	0	NA	136	8	0	178_1_10_19-Oct	0	0	0	0.956521739130435
178	1	10	top	NA	19	10	19-Oct	2017	18/12/2017	NA	29	19	19	0	NA	137	8	0	178_1_10_19-Oct	0	0	0	0.947368421052632
178	1	2	bottom	NA	19	10	19-Oct	2017	18/12/2017	NA	29	16	19	3	NA	138	8	0	178_1_2_19-Oct	0	0	0	0.4375
178	1	2	top	NA	19	10	19-Oct	2017	18/12/2017	NA	29	10	12	2	NA	139	8	0	178_1_2_19-Oct	0	0	0	0.2
178	1	3	bottom	NA	19	10	19-Oct	2017	18/12/2017	NA	29	16	16	0	NA	122	8	0	178_1_3_19-Oct	0	0	0	0.8125
178	1	3	top	NA	19	10	19-Oct	2017	18/12/2017	NA	29	8	8	0	NA	123	8	0	178_1_3_19-Oct	0	0	0	0.875
178	1	4	bottom	NA	19	10	19-Oct	2017	18/12/2017	NA	29	20	20	0	NA	124	8	0	178_1_4_19-Oct	0	0	0	1
178	1	4	top	NA	19	10	19-Oct	2017	18/12/2017	NA	29	7	7	0	NA	125	8	0	178_1_4_19-Oct	0	0	0	1
178	1	5	bottom	NA	19	10	19-Oct	2017	18/12/2017	NA	29	19	19	0	NA	126	8	0	178_1_5_19-Oct	0	0	0	1
178	1	5	top	NA	19	10	19-Oct	2017	18/12/2017	NA	29	14	14	0	NA	127	8	0	178_1_5_19-Oct	0	0	0	1
178	1	6	bottom	NA	19	10	19-Oct	2017	18/12/2017	NA	29	19	19	0	NA	128	8	0	178_1_6_19-Oct	0	0	0	0.894736842105263
178	1	6	top	NA	19	10	19-Oct	2017	18/12/2017	NA	29	10	10	0	NA	129	8	0	178_1_6_19-Oct	0	0	0	0.6
178	1	7	bottom	NA	19	10	19-Oct	2017	18/12/2017	NA	29	19	19	0	NA	130	8	0	178_1_7_19-Oct	0	0	0	0.947368421052632
178	1	7	top	NA	19	10	19-Oct	2017	18/12/2017	NA	29	15	15	0	NA	131	8	0	178_1_7_19-Oct	0	0	0	1
178	1	8	bottom	NA	19	10	19-Oct	2017	18/12/2017	NA	29	21	21	0	NA	132	8	0	178_1_8_19-Oct	0	0	0	1
178	1	8	top	NA	19	10	19-Oct	2017	18/12/2017	NA	29	22	22	0	NA	133	8	0	178_1_8_19-Oct	0	0	0	0.954545454545455
178	1	9	bottom	NA	19	10	19-Oct	2017	18/12/2017	NA	29	21	23	2	NA	134	8	0	178_1_9_19-Oct	0	0	0	1
178	1	9	top	NA	19	10	19-Oct	2017	18/12/2017	NA	29	13	15	2	NA	135	8	0	178_1_9_19-Oct	0	0	0	1
178	2	1	bottom	NA	19	10	19-Oct	2017	18/12/2017	NA	29	10	10	0	NA	140	8	0	178_2_1_19-Oct	0	0	0	0
178	2	1	top	NA	19	10	19-Oct	2017	18/12/2017	NA	29	13	13	0	NA	141	8	0	178_2_1_19-Oct	0	0	0	0.538461538461539
178	2	10	bottom	NA	19	10	19-Oct	2017	18/12/2017	NA	29	16	16	0	NA	156	8	0	178_2_10_19-Oct	0	0	0	0.1875
178	2	10	top	NA	19	10	19-Oct	2017	18/12/2017	NA	29	22	22	0	NA	157	8	1	178_2_10_19-Oct	4.54545454545455	4.54545454545455	0.0454545454545455	0.954545454545454
178	2	2	bottom	NA	19	10	19-Oct	2017	18/12/2017	NA	29	19	19	0	NA	158	8	1	178_2_2_19-Oct	5.26315789473684	5.26315789473684	0.0526315789473684	0.894736842105263
178	2	2	top	NA	19	10	19-Oct	2017	18/12/2017	NA	29	20	20	0	NA	159	8	0	178_2_2_19-Oct	0	0	0	1
178	2	3	bottom	NA	19	10	19-Oct	2017	18/12/2017	NA	29	16	16	0	NA	142	8	0	178_2_3_19-Oct	0	0	0	0.1875
178	2	3	top	NA	19	10	19-Oct	2017	18/12/2017	NA	29	16	16	0	NA	143	8	0	178_2_3_19-Oct	0	0	0	0.375
178	2	4	bottom	NA	19	10	19-Oct	2017	18/12/2017	NA	29	26	26	0	NA	144	8	1	178_2_4_19-Oct	3.84615384615385	3.84615384615385	0.0384615384615385	0.269230769230769
178	2	4	top	NA	19	10	19-Oct	2017	18/12/2017	NA	29	16	16	0	NA	145	8	1	178_2_4_19-Oct	6.25	6.25	0.0625	0.875
178	2	5	bottom	NA	19	10	19-Oct	2017	18/12/2017	NA	29	20	20	0	NA	146	8	0	178_2_5_19-Oct	0	0	0	1
178	2	5	top	NA	19	10	19-Oct	2017	18/12/2017	NA	29	8	8	0	NA	147	8	0	178_2_5_19-Oct	0	0	0	1
178	2	6	bottom	NA	19	10	19-Oct	2017	18/12/2017	NA	29	19	19	0	NA	148	8	0	178_2_6_19-Oct	0	0	0	0.526315789473684
178	2	6	top	NA	19	10	19-Oct	2017	18/12/2017	NA	29	24	24	0	NA	149	8	0	178_2_6_19-Oct	0	0	0	0.958333333333333
178	2	7	bottom	NA	19	10	19-Oct	2017	18/12/2017	NA	29	20	20	0	NA	150	8	0	178_2_7_19-Oct	0	0	0	1
178	2	7	top	NA	19	10	19-Oct	2017	18/12/2017	NA	29	21	21	0	NA	151	8	0	178_2_7_19-Oct	0	0	0	0.952380952380952
178	2	8	bottom	NA	19	10	19-Oct	2017	18/12/2017	NA	29	15	15	0	NA	152	8	0	178_2_8_19-Oct	0	0	0	0.666666666666667
178	2	8	top	NA	19	10	19-Oct	2017	18/12/2017	NA	29	17	17	0	NA	153	8	0	178_2_8_19-Oct	0	0	0	1
178	2	9	bottom	NA	19	10	19-Oct	2017	18/12/2017	NA	29	18	18	0	NA	154	8	0	178_2_9_19-Oct	0	0	0	0.277777777777778
178	2	9	top	NA	19	10	19-Oct	2017	18/12/2017	NA	29	19	19	0	NA	155	8	0	178_2_9_19-Oct	0	0	0	0.842105263157895
178	1	1	bottom	NA	19	10	19-Oct	2017	18/12/2017	NA	29	15	19	4	NA	120	9	0	178_1_1_19-Oct	0	0	0	1
178	1	1	top	NA	19	10	19-Oct	2017	18/12/2017	NA	29	18	18	0	NA	121	9	0	178_1_1_19-Oct	0	0	0	1
178	1	10	bottom	NA	19	10	19-Oct	2017	18/12/2017	NA	29	23	23	0	NA	136	9	0	178_1_10_19-Oct	0	0	0	0.956521739130435
178	1	10	top	NA	19	10	19-Oct	2017	18/12/2017	NA	29	19	19	0	NA	137	9	0	178_1_10_19-Oct	0	0	0	0.947368421052632
178	1	2	bottom	NA	19	10	19-Oct	2017	18/12/2017	NA	29	16	19	3	NA	138	9	0	178_1_2_19-Oct	0	0	0	0.4375
178	1	2	top	NA	19	10	19-Oct	2017	18/12/2017	NA	29	10	12	2	NA	139	9	0	178_1_2_19-Oct	0	0	0	0.2
178	1	3	bottom	NA	19	10	19-Oct	2017	18/12/2017	NA	29	16	16	0	NA	122	9	0	178_1_3_19-Oct	0	0	0	0.8125
178	1	3	top	NA	19	10	19-Oct	2017	18/12/2017	NA	29	8	8	0	NA	123	9	0	178_1_3_19-Oct	0	0	0	0.875
178	1	4	bottom	NA	19	10	19-Oct	2017	18/12/2017	NA	29	20	20	0	NA	124	9	0	178_1_4_19-Oct	0	0	0	1
178	1	4	top	NA	19	10	19-Oct	2017	18/12/2017	NA	29	7	7	0	NA	125	9	0	178_1_4_19-Oct	0	0	0	1
178	1	5	bottom	NA	19	10	19-Oct	2017	18/12/2017	NA	29	19	19	0	NA	126	9	0	178_1_5_19-Oct	0	0	0	1
178	1	5	top	NA	19	10	19-Oct	2017	18/12/2017	NA	29	14	14	0	NA	127	9	0	178_1_5_19-Oct	0	0	0	1
178	1	6	bottom	NA	19	10	19-Oct	2017	18/12/2017	NA	29	19	19	0	NA	128	9	0	178_1_6_19-Oct	0	0	0	0.894736842105263
178	1	6	top	NA	19	10	19-Oct	2017	18/12/2017	NA	29	10	10	0	NA	129	9	0	178_1_6_19-Oct	0	0	0	0.6
178	1	7	bottom	NA	19	10	19-Oct	2017	18/12/2017	NA	29	19	19	0	NA	130	9	0	178_1_7_19-Oct	0	0	0	0.947368421052632
178	1	7	top	NA	19	10	19-Oct	2017	18/12/2017	NA	29	15	15	0	NA	131	9	0	178_1_7_19-Oct	0	0	0	1
178	1	8	bottom	NA	19	10	19-Oct	2017	18/12/2017	NA	29	21	21	0	NA	132	9	0	178_1_8_19-Oct	0	0	0	1
178	1	8	top	NA	19	10	19-Oct	2017	18/12/2017	NA	29	22	22	0	NA	133	9	0	178_1_8_19-Oct	0	0	0	0.954545454545455
178	1	9	bottom	NA	19	10	19-Oct	2017	18/12/2017	NA	29	21	23	2	NA	134	9	0	178_1_9_19-Oct	0	0	0	1
178	1	9	top	NA	19	10	19-Oct	2017	18/12/2017	NA	29	13	15	2	NA	135	9	0	178_1_9_19-Oct	0	0	0	1
178	2	1	bottom	NA	19	10	19-Oct	2017	18/12/2017	NA	29	10	10	0	NA	140	9	0	178_2_1_19-Oct	0	0	0	0
178	2	1	top	NA	19	10	19-Oct	2017	18/12/2017	NA	29	13	13	0	NA	141	9	0	178_2_1_19-Oct	0	0	0	0.538461538461539
178	2	10	bottom	NA	19	10	19-Oct	2017	18/12/2017	NA	29	16	16	0	NA	156	9	0	178_2_10_19-Oct	0	0	0	0.1875
178	2	10	top	NA	19	10	19-Oct	2017	18/12/2017	NA	29	22	22	0	NA	157	9	0	178_2_10_19-Oct	0	0	0	0.954545454545454
178	2	2	bottom	NA	19	10	19-Oct	2017	18/12/2017	NA	29	19	19	0	NA	158	9	0	178_2_2_19-Oct	0	0	0	0.894736842105263
178	2	2	top	NA	19	10	19-Oct	2017	18/12/2017	NA	29	20	20	0	NA	159	9	0	178_2_2_19-Oct	0	0	0	1
178	2	3	bottom	NA	19	10	19-Oct	2017	18/12/2017	NA	29	16	16	0	NA	142	9	0	178_2_3_19-Oct	0	0	0	0.1875
178	2	3	top	NA	19	10	19-Oct	2017	18/12/2017	NA	29	16	16	0	NA	143	9	1	178_2_3_19-Oct	6.25	6.25	0.0625	0.4375
178	2	4	bottom	NA	19	10	19-Oct	2017	18/12/2017	NA	29	26	26	0	NA	144	9	0	178_2_4_19-Oct	0	0	0	0.269230769230769
178	2	4	top	NA	19	10	19-Oct	2017	18/12/2017	NA	29	16	16	0	NA	145	9	0	178_2_4_19-Oct	0	0	0	0.875
178	2	5	bottom	NA	19	10	19-Oct	2017	18/12/2017	NA	29	20	20	0	NA	146	9	0	178_2_5_19-Oct	0	0	0	1
178	2	5	top	NA	19	10	19-Oct	2017	18/12/2017	NA	29	8	8	0	NA	147	9	0	178_2_5_19-Oct	0	0	0	1
178	2	6	bottom	NA	19	10	19-Oct	2017	18/12/2017	NA	29	19	19	0	NA	148	9	0	178_2_6_19-Oct	0	0	0	0.526315789473684
178	2	6	top	NA	19	10	19-Oct	2017	18/12/2017	NA	29	24	24	0	NA	149	9	0	178_2_6_19-Oct	0	0	0	0.958333333333333
178	2	7	bottom	NA	19	10	19-Oct	2017	18/12/2017	NA	29	20	20	0	NA	150	9	0	178_2_7_19-Oct	0	0	0	1
178	2	7	top	NA	19	10	19-Oct	2017	18/12/2017	NA	29	21	21	0	NA	151	9	0	178_2_7_19-Oct	0	0	0	0.952380952380952
178	2	8	bottom	NA	19	10	19-Oct	2017	18/12/2017	NA	29	15	15	0	NA	152	9	0	178_2_8_19-Oct	0	0	0	0.666666666666667
178	2	8	top	NA	19	10	19-Oct	2017	18/12/2017	NA	29	17	17	0	NA	153	9	0	178_2_8_19-Oct	0	0	0	1
178	2	9	bottom	NA	19	10	19-Oct	2017	18/12/2017	NA	29	18	18	0	NA	154	9	0	178_2_9_19-Oct	0	0	0	0.277777777777778
178	2	9	top	NA	19	10	19-Oct	2017	18/12/2017	NA	29	19	19	0	NA	155	9	0	178_2_9_19-Oct	0	0	0	0.842105263157895
178	1	1	bottom	NA	19	10	19-Oct	2017	18/12/2017	NA	29	15	19	4	NA	120	10	0	178_1_1_19-Oct	0	0	0	1
178	1	1	top	NA	19	10	19-Oct	2017	18/12/2017	NA	29	18	18	0	NA	121	10	0	178_1_1_19-Oct	0	0	0	1
178	1	10	bottom	NA	19	10	19-Oct	2017	18/12/2017	NA	29	23	23	0	NA	136	10	0	178_1_10_19-Oct	0	0	0	0.956521739130435
178	1	10	top	NA	19	10	19-Oct	2017	18/12/2017	NA	29	19	19	0	NA	137	10	0	178_1_10_19-Oct	0	0	0	0.947368421052632
178	1	2	bottom	NA	19	10	19-Oct	2017	18/12/2017	NA	29	16	19	3	NA	138	10	0	178_1_2_19-Oct	0	0	0	0.4375
178	1	2	top	NA	19	10	19-Oct	2017	18/12/2017	NA	29	10	12	2	NA	139	10	0	178_1_2_19-Oct	0	0	0	0.2
178	1	3	bottom	NA	19	10	19-Oct	2017	18/12/2017	NA	29	16	16	0	NA	122	10	0	178_1_3_19-Oct	0	0	0	0.8125
178	1	3	top	NA	19	10	19-Oct	2017	18/12/2017	NA	29	8	8	0	NA	123	10	0	178_1_3_19-Oct	0	0	0	0.875
178	1	4	bottom	NA	19	10	19-Oct	2017	18/12/2017	NA	29	20	20	0	NA	124	10	0	178_1_4_19-Oct	0	0	0	1
178	1	4	top	NA	19	10	19-Oct	2017	18/12/2017	NA	29	7	7	0	NA	125	10	0	178_1_4_19-Oct	0	0	0	1
178	1	5	bottom	NA	19	10	19-Oct	2017	18/12/2017	NA	29	19	19	0	NA	126	10	0	178_1_5_19-Oct	0	0	0	1
178	1	5	top	NA	19	10	19-Oct	2017	18/12/2017	NA	29	14	14	0	NA	127	10	0	178_1_5_19-Oct	0	0	0	1
178	1	6	bottom	NA	19	10	19-Oct	2017	18/12/2017	NA	29	19	19	0	NA	128	10	0	178_1_6_19-Oct	0	0	0	0.894736842105263
178	1	6	top	NA	19	10	19-Oct	2017	18/12/2017	NA	29	10	10	0	NA	129	10	0	178_1_6_19-Oct	0	0	0	0.6
178	1	7	bottom	NA	19	10	19-Oct	2017	18/12/2017	NA	29	19	19	0	NA	130	10	0	178_1_7_19-Oct	0	0	0	0.947368421052632
178	1	7	top	NA	19	10	19-Oct	2017	18/12/2017	NA	29	15	15	0	NA	131	10	0	178_1_7_19-Oct	0	0	0	1
178	1	8	bottom	NA	19	10	19-Oct	2017	18/12/2017	NA	29	21	21	0	NA	132	10	0	178_1_8_19-Oct	0	0	0	1
178	1	8	top	NA	19	10	19-Oct	2017	18/12/2017	NA	29	22	22	0	NA	133	10	0	178_1_8_19-Oct	0	0	0	0.954545454545455
178	1	9	bottom	NA	19	10	19-Oct	2017	18/12/2017	NA	29	21	23	2	NA	134	10	0	178_1_9_19-Oct	0	0	0	1
178	1	9	top	NA	19	10	19-Oct	2017	18/12/2017	NA	29	13	15	2	NA	135	10	0	178_1_9_19-Oct	0	0	0	1
178	2	1	bottom	NA	19	10	19-Oct	2017	18/12/2017	NA	29	10	10	0	NA	140	10	0	178_2_1_19-Oct	0	0	0	0
178	2	1	top	NA	19	10	19-Oct	2017	18/12/2017	NA	29	13	13	0	NA	141	10	0	178_2_1_19-Oct	0	0	0	0.538461538461539
178	2	10	bottom	NA	19	10	19-Oct	2017	18/12/2017	NA	29	16	16	0	NA	156	10	0	178_2_10_19-Oct	0	0	0	0.1875
178	2	10	top	NA	19	10	19-Oct	2017	18/12/2017	NA	29	22	22	0	NA	157	10	0	178_2_10_19-Oct	0	0	0	0.954545454545454
178	2	2	bottom	NA	19	10	19-Oct	2017	18/12/2017	NA	29	19	19	0	NA	158	10	0	178_2_2_19-Oct	0	0	0	0.894736842105263
178	2	2	top	NA	19	10	19-Oct	2017	18/12/2017	NA	29	20	20	0	NA	159	10	0	178_2_2_19-Oct	0	0	0	1
178	2	3	bottom	NA	19	10	19-Oct	2017	18/12/2017	NA	29	16	16	0	NA	142	10	0	178_2_3_19-Oct	0	0	0	0.1875
178	2	3	top	NA	19	10	19-Oct	2017	18/12/2017	NA	29	16	16	0	NA	143	10	0	178_2_3_19-Oct	0	0	0	0.4375
178	2	4	bottom	NA	19	10	19-Oct	2017	18/12/2017	NA	29	26	26	0	NA	144	10	0	178_2_4_19-Oct	0	0	0	0.269230769230769
178	2	4	top	NA	19	10	19-Oct	2017	18/12/2017	NA	29	16	16	0	NA	145	10	0	178_2_4_19-Oct	0	0	0	0.875
178	2	5	bottom	NA	19	10	19-Oct	2017	18/12/2017	NA	29	20	20	0	NA	146	10	0	178_2_5_19-Oct	0	0	0	1
178	2	5	top	NA	19	10	19-Oct	2017	18/12/2017	NA	29	8	8	0	NA	147	10	0	178_2_5_19-Oct	0	0	0	1
178	2	6	bottom	NA	19	10	19-Oct	2017	18/12/2017	NA	29	19	19	0	NA	148	10	0	178_2_6_19-Oct	0	0	0	0.526315789473684
178	2	6	top	NA	19	10	19-Oct	2017	18/12/2017	NA	29	24	24	0	NA	149	10	0	178_2_6_19-Oct	0	0	0	0.958333333333333
178	2	7	bottom	NA	19	10	19-Oct	2017	18/12/2017	NA	29	20	20	0	NA	150	10	0	178_2_7_19-Oct	0	0	0	1
178	2	7	top	NA	19	10	19-Oct	2017	18/12/2017	NA	29	21	21	0	NA	151	10	0	178_2_7_19-Oct	0	0	0	0.952380952380952
178	2	8	bottom	NA	19	10	19-Oct	2017	18/12/2017	NA	29	15	15	0	NA	152	10	0	178_2_8_19-Oct	0	0	0	0.666666666666667
178	2	8	top	NA	19	10	19-Oct	2017	18/12/2017	NA	29	17	17	0	NA	153	10	0	178_2_8_19-Oct	0	0	0	1
178	2	9	bottom	NA	19	10	19-Oct	2017	18/12/2017	NA	29	18	18	0	NA	154	10	0	178_2_9_19-Oct	0	0	0	0.277777777777778
178	2	9	top	NA	19	10	19-Oct	2017	18/12/2017	NA	29	19	19	0	NA	155	10	0	178_2_9_19-Oct	0	0	0	0.842105263157895
178	1	1	bottom	NA	19	10	19-Oct	2017	18/12/2017	NA	29	15	19	4	NA	120	11	0	178_1_1_19-Oct	0	0	0	1
178	1	1	top	NA	19	10	19-Oct	2017	18/12/2017	NA	29	18	18	0	NA	121	11	0	178_1_1_19-Oct	0	0	0	1
178	1	10	bottom	NA	19	10	19-Oct	2017	18/12/2017	NA	29	23	23	0	NA	136	11	0	178_1_10_19-Oct	0	0	0	0.956521739130435
178	1	10	top	NA	19	10	19-Oct	2017	18/12/2017	NA	29	19	19	0	NA	137	11	0	178_1_10_19-Oct	0	0	0	0.947368421052632
178	1	2	bottom	NA	19	10	19-Oct	2017	18/12/2017	NA	29	16	19	3	NA	138	11	0	178_1_2_19-Oct	0	0	0	0.4375
178	1	2	top	NA	19	10	19-Oct	2017	18/12/2017	NA	29	10	12	2	NA	139	11	2	178_1_2_19-Oct	16.6666666666667	20	0.2	0.4
178	1	3	bottom	NA	19	10	19-Oct	2017	18/12/2017	NA	29	16	16	0	NA	122	11	0	178_1_3_19-Oct	0	0	0	0.8125
178	1	3	top	NA	19	10	19-Oct	2017	18/12/2017	NA	29	8	8	0	NA	123	11	1	178_1_3_19-Oct	12.5	12.5	0.125	1
178	1	4	bottom	NA	19	10	19-Oct	2017	18/12/2017	NA	29	20	20	0	NA	124	11	0	178_1_4_19-Oct	0	0	0	1
178	1	4	top	NA	19	10	19-Oct	2017	18/12/2017	NA	29	7	7	0	NA	125	11	0	178_1_4_19-Oct	0	0	0	1
178	1	5	bottom	NA	19	10	19-Oct	2017	18/12/2017	NA	29	19	19	0	NA	126	11	0	178_1_5_19-Oct	0	0	0	1
178	1	5	top	NA	19	10	19-Oct	2017	18/12/2017	NA	29	14	14	0	NA	127	11	0	178_1_5_19-Oct	0	0	0	1
178	1	6	bottom	NA	19	10	19-Oct	2017	18/12/2017	NA	29	19	19	0	NA	128	11	0	178_1_6_19-Oct	0	0	0	0.894736842105263
178	1	6	top	NA	19	10	19-Oct	2017	18/12/2017	NA	29	10	10	0	NA	129	11	2	178_1_6_19-Oct	20	20	0.2	0.8
178	1	7	bottom	NA	19	10	19-Oct	2017	18/12/2017	NA	29	19	19	0	NA	130	11	0	178_1_7_19-Oct	0	0	0	0.947368421052632
178	1	7	top	NA	19	10	19-Oct	2017	18/12/2017	NA	29	15	15	0	NA	131	11	0	178_1_7_19-Oct	0	0	0	1
178	1	8	bottom	NA	19	10	19-Oct	2017	18/12/2017	NA	29	21	21	0	NA	132	11	0	178_1_8_19-Oct	0	0	0	1
178	1	8	top	NA	19	10	19-Oct	2017	18/12/2017	NA	29	22	22	0	NA	133	11	0	178_1_8_19-Oct	0	0	0	0.954545454545455
178	1	9	bottom	NA	19	10	19-Oct	2017	18/12/2017	NA	29	21	23	2	NA	134	11	0	178_1_9_19-Oct	0	0	0	1
178	1	9	top	NA	19	10	19-Oct	2017	18/12/2017	NA	29	13	15	2	NA	135	11	0	178_1_9_19-Oct	0	0	0	1
178	2	1	bottom	NA	19	10	19-Oct	2017	18/12/2017	NA	29	10	10	0	NA	140	11	1	178_2_1_19-Oct	10	10	0.1	0.1
178	2	1	top	NA	19	10	19-Oct	2017	18/12/2017	NA	29	13	13	0	NA	141	11	1	178_2_1_19-Oct	7.69230769230769	7.69230769230769	0.0769230769230769	0.615384615384615
178	2	10	bottom	NA	19	10	19-Oct	2017	18/12/2017	NA	29	16	16	0	NA	156	11	0	178_2_10_19-Oct	0	0	0	0.1875
178	2	10	top	NA	19	10	19-Oct	2017	18/12/2017	NA	29	22	22	0	NA	157	11	0	178_2_10_19-Oct	0	0	0	0.954545454545454
178	2	2	bottom	NA	19	10	19-Oct	2017	18/12/2017	NA	29	19	19	0	NA	158	11	0	178_2_2_19-Oct	0	0	0	0.894736842105263
178	2	2	top	NA	19	10	19-Oct	2017	18/12/2017	NA	29	20	20	0	NA	159	11	0	178_2_2_19-Oct	0	0	0	1
178	2	3	bottom	NA	19	10	19-Oct	2017	18/12/2017	NA	29	16	16	0	NA	142	11	0	178_2_3_19-Oct	0	0	0	0.1875
178	2	3	top	NA	19	10	19-Oct	2017	18/12/2017	NA	29	16	16	0	NA	143	11	1	178_2_3_19-Oct	6.25	6.25	0.0625	0.5
178	2	4	bottom	NA	19	10	19-Oct	2017	18/12/2017	NA	29	26	26	0	NA	144	11	7	178_2_4_19-Oct	26.9230769230769	26.9230769230769	0.269230769230769	0.538461538461538
178	2	4	top	NA	19	10	19-Oct	2017	18/12/2017	NA	29	16	16	0	NA	145	11	0	178_2_4_19-Oct	0	0	0	0.875
178	2	5	bottom	NA	19	10	19-Oct	2017	18/12/2017	NA	29	20	20	0	NA	146	11	0	178_2_5_19-Oct	0	0	0	1
178	2	5	top	NA	19	10	19-Oct	2017	18/12/2017	NA	29	8	8	0	NA	147	11	0	178_2_5_19-Oct	0	0	0	1
178	2	6	bottom	NA	19	10	19-Oct	2017	18/12/2017	NA	29	19	19	0	NA	148	11	1	178_2_6_19-Oct	5.26315789473684	5.26315789473684	0.0526315789473684	0.578947368421053
178	2	6	top	NA	19	10	19-Oct	2017	18/12/2017	NA	29	24	24	0	NA	149	11	0	178_2_6_19-Oct	0	0	0	0.958333333333333
178	2	7	bottom	NA	19	10	19-Oct	2017	18/12/2017	NA	29	20	20	0	NA	150	11	0	178_2_7_19-Oct	0	0	0	1
178	2	7	top	NA	19	10	19-Oct	2017	18/12/2017	NA	29	21	21	0	NA	151	11	1	178_2_7_19-Oct	4.76190476190476	4.76190476190476	0.0476190476190476	1
178	2	8	bottom	NA	19	10	19-Oct	2017	18/12/2017	NA	29	15	15	0	NA	152	11	2	178_2_8_19-Oct	13.3333333333333	13.3333333333333	0.133333333333333	0.8
178	2	8	top	NA	19	10	19-Oct	2017	18/12/2017	NA	29	17	17	0	NA	153	11	0	178_2_8_19-Oct	0	0	0	1
178	2	9	bottom	NA	19	10	19-Oct	2017	18/12/2017	NA	29	18	18	0	NA	154	11	6	178_2_9_19-Oct	33.3333333333333	33.3333333333333	0.333333333333333	0.611111111111111
178	2	9	top	NA	19	10	19-Oct	2017	18/12/2017	NA	29	19	19	0	NA	155	11	2	178_2_9_19-Oct	10.5263157894737	10.5263157894737	0.105263157894737	0.947368421052632
178	1	1	bottom	NA	19	10	19-Oct	2017	18/12/2017	NA	29	15	19	4	NA	120	12	0	178_1_1_19-Oct	0	0	0	1
178	1	1	top	NA	19	10	19-Oct	2017	18/12/2017	NA	29	18	18	0	NA	121	12	0	178_1_1_19-Oct	0	0	0	1
178	1	10	bottom	NA	19	10	19-Oct	2017	18/12/2017	NA	29	23	23	0	NA	136	12	0	178_1_10_19-Oct	0	0	0	0.956521739130435
178	1	10	top	NA	19	10	19-Oct	2017	18/12/2017	NA	29	19	19	0	NA	137	12	0	178_1_10_19-Oct	0	0	0	0.947368421052632
178	1	2	bottom	NA	19	10	19-Oct	2017	18/12/2017	NA	29	16	19	3	NA	138	12	0	178_1_2_19-Oct	0	0	0	0.4375
178	1	2	top	NA	19	10	19-Oct	2017	18/12/2017	NA	29	10	12	2	NA	139	12	0	178_1_2_19-Oct	0	0	0	0.4
178	1	3	bottom	NA	19	10	19-Oct	2017	18/12/2017	NA	29	16	16	0	NA	122	12	0	178_1_3_19-Oct	0	0	0	0.8125
178	1	3	top	NA	19	10	19-Oct	2017	18/12/2017	NA	29	8	8	0	NA	123	12	0	178_1_3_19-Oct	0	0	0	1
178	1	4	bottom	NA	19	10	19-Oct	2017	18/12/2017	NA	29	20	20	0	NA	124	12	0	178_1_4_19-Oct	0	0	0	1
178	1	4	top	NA	19	10	19-Oct	2017	18/12/2017	NA	29	7	7	0	NA	125	12	0	178_1_4_19-Oct	0	0	0	1
178	1	5	bottom	NA	19	10	19-Oct	2017	18/12/2017	NA	29	19	19	0	NA	126	12	0	178_1_5_19-Oct	0	0	0	1
178	1	5	top	NA	19	10	19-Oct	2017	18/12/2017	NA	29	14	14	0	NA	127	12	0	178_1_5_19-Oct	0	0	0	1
178	1	6	bottom	NA	19	10	19-Oct	2017	18/12/2017	NA	29	19	19	0	NA	128	12	0	178_1_6_19-Oct	0	0	0	0.894736842105263
178	1	6	top	NA	19	10	19-Oct	2017	18/12/2017	NA	29	10	10	0	NA	129	12	0	178_1_6_19-Oct	0	0	0	0.8
178	1	7	bottom	NA	19	10	19-Oct	2017	18/12/2017	NA	29	19	19	0	NA	130	12	0	178_1_7_19-Oct	0	0	0	0.947368421052632
178	1	7	top	NA	19	10	19-Oct	2017	18/12/2017	NA	29	15	15	0	NA	131	12	0	178_1_7_19-Oct	0	0	0	1
178	1	8	bottom	NA	19	10	19-Oct	2017	18/12/2017	NA	29	21	21	0	NA	132	12	0	178_1_8_19-Oct	0	0	0	1
178	1	8	top	NA	19	10	19-Oct	2017	18/12/2017	NA	29	22	22	0	NA	133	12	0	178_1_8_19-Oct	0	0	0	0.954545454545455
178	1	9	bottom	NA	19	10	19-Oct	2017	18/12/2017	NA	29	21	23	2	NA	134	12	0	178_1_9_19-Oct	0	0	0	1
178	1	9	top	NA	19	10	19-Oct	2017	18/12/2017	NA	29	13	15	2	NA	135	12	0	178_1_9_19-Oct	0	0	0	1
178	2	1	bottom	NA	19	10	19-Oct	2017	18/12/2017	NA	29	10	10	0	NA	140	12	0	178_2_1_19-Oct	0	0	0	0.1
178	2	1	top	NA	19	10	19-Oct	2017	18/12/2017	NA	29	13	13	0	NA	141	12	0	178_2_1_19-Oct	0	0	0	0.615384615384615
178	2	10	bottom	NA	19	10	19-Oct	2017	18/12/2017	NA	29	16	16	0	NA	156	12	0	178_2_10_19-Oct	0	0	0	0.1875
178	2	10	top	NA	19	10	19-Oct	2017	18/12/2017	NA	29	22	22	0	NA	157	12	0	178_2_10_19-Oct	0	0	0	0.954545454545454
178	2	2	bottom	NA	19	10	19-Oct	2017	18/12/2017	NA	29	19	19	0	NA	158	12	0	178_2_2_19-Oct	0	0	0	0.894736842105263
178	2	2	top	NA	19	10	19-Oct	2017	18/12/2017	NA	29	20	20	0	NA	159	12	0	178_2_2_19-Oct	0	0	0	1
178	2	3	bottom	NA	19	10	19-Oct	2017	18/12/2017	NA	29	16	16	0	NA	142	12	0	178_2_3_19-Oct	0	0	0	0.1875
178	2	3	top	NA	19	10	19-Oct	2017	18/12/2017	NA	29	16	16	0	NA	143	12	0	178_2_3_19-Oct	0	0	0	0.5
178	2	4	bottom	NA	19	10	19-Oct	2017	18/12/2017	NA	29	26	26	0	NA	144	12	0	178_2_4_19-Oct	0	0	0	0.538461538461538
178	2	4	top	NA	19	10	19-Oct	2017	18/12/2017	NA	29	16	16	0	NA	145	12	1	178_2_4_19-Oct	6.25	6.25	0.0625	0.9375
178	2	5	bottom	NA	19	10	19-Oct	2017	18/12/2017	NA	29	20	20	0	NA	146	12	0	178_2_5_19-Oct	0	0	0	1
178	2	5	top	NA	19	10	19-Oct	2017	18/12/2017	NA	29	8	8	0	NA	147	12	0	178_2_5_19-Oct	0	0	0	1
178	2	6	bottom	NA	19	10	19-Oct	2017	18/12/2017	NA	29	19	19	0	NA	148	12	0	178_2_6_19-Oct	0	0	0	0.578947368421053
178	2	6	top	NA	19	10	19-Oct	2017	18/12/2017	NA	29	24	24	0	NA	149	12	0	178_2_6_19-Oct	0	0	0	0.958333333333333
178	2	7	bottom	NA	19	10	19-Oct	2017	18/12/2017	NA	29	20	20	0	NA	150	12	0	178_2_7_19-Oct	0	0	0	1
178	2	7	top	NA	19	10	19-Oct	2017	18/12/2017	NA	29	21	21	0	NA	151	12	0	178_2_7_19-Oct	0	0	0	1
178	2	8	bottom	NA	19	10	19-Oct	2017	18/12/2017	NA	29	15	15	0	NA	152	12	0	178_2_8_19-Oct	0	0	0	0.8
178	2	8	top	NA	19	10	19-Oct	2017	18/12/2017	NA	29	17	17	0	NA	153	12	0	178_2_8_19-Oct	0	0	0	1
178	2	9	bottom	NA	19	10	19-Oct	2017	18/12/2017	NA	29	18	18	0	NA	154	12	0	178_2_9_19-Oct	0	0	0	0.611111111111111
178	2	9	top	NA	19	10	19-Oct	2017	18/12/2017	NA	29	19	19	0	NA	155	12	0	178_2_9_19-Oct	0	0	0	0.947368421052632
178	1	1	bottom	NA	19	10	19-Oct	2017	18/12/2017	NA	29	15	19	4	NA	120	13	0	178_1_1_19-Oct	0	0	0	1
178	1	1	top	NA	19	10	19-Oct	2017	18/12/2017	NA	29	18	18	0	NA	121	13	0	178_1_1_19-Oct	0	0	0	1
178	1	10	bottom	NA	19	10	19-Oct	2017	18/12/2017	NA	29	23	23	0	NA	136	13	0	178_1_10_19-Oct	0	0	0	0.956521739130435
178	1	10	top	NA	19	10	19-Oct	2017	18/12/2017	NA	29	19	19	0	NA	137	13	0	178_1_10_19-Oct	0	0	0	0.947368421052632
178	1	2	bottom	NA	19	10	19-Oct	2017	18/12/2017	NA	29	16	19	3	NA	138	13	0	178_1_2_19-Oct	0	0	0	0.4375
178	1	2	top	NA	19	10	19-Oct	2017	18/12/2017	NA	29	10	12	2	NA	139	13	0	178_1_2_19-Oct	0	0	0	0.4
178	1	3	bottom	NA	19	10	19-Oct	2017	18/12/2017	NA	29	16	16	0	NA	122	13	0	178_1_3_19-Oct	0	0	0	0.8125
178	1	3	top	NA	19	10	19-Oct	2017	18/12/2017	NA	29	8	8	0	NA	123	13	0	178_1_3_19-Oct	0	0	0	1
178	1	4	bottom	NA	19	10	19-Oct	2017	18/12/2017	NA	29	20	20	0	NA	124	13	0	178_1_4_19-Oct	0	0	0	1
178	1	4	top	NA	19	10	19-Oct	2017	18/12/2017	NA	29	7	7	0	NA	125	13	0	178_1_4_19-Oct	0	0	0	1
178	1	5	bottom	NA	19	10	19-Oct	2017	18/12/2017	NA	29	19	19	0	NA	126	13	0	178_1_5_19-Oct	0	0	0	1
178	1	5	top	NA	19	10	19-Oct	2017	18/12/2017	NA	29	14	14	0	NA	127	13	0	178_1_5_19-Oct	0	0	0	1
178	1	6	bottom	NA	19	10	19-Oct	2017	18/12/2017	NA	29	19	19	0	NA	128	13	0	178_1_6_19-Oct	0	0	0	0.894736842105263
178	1	6	top	NA	19	10	19-Oct	2017	18/12/2017	NA	29	10	10	0	NA	129	13	0	178_1_6_19-Oct	0	0	0	0.8
178	1	7	bottom	NA	19	10	19-Oct	2017	18/12/2017	NA	29	19	19	0	NA	130	13	0	178_1_7_19-Oct	0	0	0	0.947368421052632
178	1	7	top	NA	19	10	19-Oct	2017	18/12/2017	NA	29	15	15	0	NA	131	13	0	178_1_7_19-Oct	0	0	0	1
178	1	8	bottom	NA	19	10	19-Oct	2017	18/12/2017	NA	29	21	21	0	NA	132	13	0	178_1_8_19-Oct	0	0	0	1
178	1	8	top	NA	19	10	19-Oct	2017	18/12/2017	NA	29	22	22	0	NA	133	13	0	178_1_8_19-Oct	0	0	0	0.954545454545455
178	1	9	bottom	NA	19	10	19-Oct	2017	18/12/2017	NA	29	21	23	2	NA	134	13	0	178_1_9_19-Oct	0	0	0	1
178	1	9	top	NA	19	10	19-Oct	2017	18/12/2017	NA	29	13	15	2	NA	135	13	0	178_1_9_19-Oct	0	0	0	1
178	2	1	bottom	NA	19	10	19-Oct	2017	18/12/2017	NA	29	10	10	0	NA	140	13	0	178_2_1_19-Oct	0	0	0	0.1
178	2	1	top	NA	19	10	19-Oct	2017	18/12/2017	NA	29	13	13	0	NA	141	13	0	178_2_1_19-Oct	0	0	0	0.615384615384615
178	2	10	bottom	NA	19	10	19-Oct	2017	18/12/2017	NA	29	16	16	0	NA	156	13	0	178_2_10_19-Oct	0	0	0	0.1875
178	2	10	top	NA	19	10	19-Oct	2017	18/12/2017	NA	29	22	22	0	NA	157	13	0	178_2_10_19-Oct	0	0	0	0.954545454545454
178	2	2	bottom	NA	19	10	19-Oct	2017	18/12/2017	NA	29	19	19	0	NA	158	13	0	178_2_2_19-Oct	0	0	0	0.894736842105263
178	2	2	top	NA	19	10	19-Oct	2017	18/12/2017	NA	29	20	20	0	NA	159	13	0	178_2_2_19-Oct	0	0	0	1
178	2	3	bottom	NA	19	10	19-Oct	2017	18/12/2017	NA	29	16	16	0	NA	142	13	0	178_2_3_19-Oct	0	0	0	0.1875
178	2	3	top	NA	19	10	19-Oct	2017	18/12/2017	NA	29	16	16	0	NA	143	13	0	178_2_3_19-Oct	0	0	0	0.5
178	2	4	bottom	NA	19	10	19-Oct	2017	18/12/2017	NA	29	26	26	0	NA	144	13	1	178_2_4_19-Oct	3.84615384615385	3.84615384615385	0.0384615384615385	0.576923076923077
178	2	4	top	NA	19	10	19-Oct	2017	18/12/2017	NA	29	16	16	0	NA	145	13	0	178_2_4_19-Oct	0	0	0	0.9375
178	2	5	bottom	NA	19	10	19-Oct	2017	18/12/2017	NA	29	20	20	0	NA	146	13	0	178_2_5_19-Oct	0	0	0	1
178	2	5	top	NA	19	10	19-Oct	2017	18/12/2017	NA	29	8	8	0	NA	147	13	0	178_2_5_19-Oct	0	0	0	1
178	2	6	bottom	NA	19	10	19-Oct	2017	18/12/2017	NA	29	19	19	0	NA	148	13	1	178_2_6_19-Oct	5.26315789473684	5.26315789473684	0.0526315789473684	0.631578947368421
178	2	6	top	NA	19	10	19-Oct	2017	18/12/2017	NA	29	24	24	0	NA	149	13	0	178_2_6_19-Oct	0	0	0	0.958333333333333
178	2	7	bottom	NA	19	10	19-Oct	2017	18/12/2017	NA	29	20	20	0	NA	150	13	0	178_2_7_19-Oct	0	0	0	1
178	2	7	top	NA	19	10	19-Oct	2017	18/12/2017	NA	29	21	21	0	NA	151	13	0	178_2_7_19-Oct	0	0	0	1
178	2	8	bottom	NA	19	10	19-Oct	2017	18/12/2017	NA	29	15	15	0	NA	152	13	1	178_2_8_19-Oct	6.66666666666667	6.66666666666667	0.0666666666666667	0.866666666666667
178	2	8	top	NA	19	10	19-Oct	2017	18/12/2017	NA	29	17	17	0	NA	153	13	0	178_2_8_19-Oct	0	0	0	1
178	2	9	bottom	NA	19	10	19-Oct	2017	18/12/2017	NA	29	18	18	0	NA	154	13	2	178_2_9_19-Oct	11.1111111111111	11.1111111111111	0.111111111111111	0.722222222222222
178	2	9	top	NA	19	10	19-Oct	2017	18/12/2017	NA	29	19	19	0	NA	155	13	0	178_2_9_19-Oct	0	0	0	0.947368421052632
178	1	1	bottom	NA	19	10	19-Oct	2017	18/12/2017	NA	29	15	19	4	NA	120	14	0	178_1_1_19-Oct	0	0	0	1
178	1	1	top	NA	19	10	19-Oct	2017	18/12/2017	NA	29	18	18	0	NA	121	14	0	178_1_1_19-Oct	0	0	0	1
178	1	10	bottom	NA	19	10	19-Oct	2017	18/12/2017	NA	29	23	23	0	NA	136	14	0	178_1_10_19-Oct	0	0	0	0.956521739130435
178	1	10	top	NA	19	10	19-Oct	2017	18/12/2017	NA	29	19	19	0	NA	137	14	0	178_1_10_19-Oct	0	0	0	0.947368421052632
178	1	2	bottom	NA	19	10	19-Oct	2017	18/12/2017	NA	29	16	19	3	NA	138	14	0	178_1_2_19-Oct	0	0	0	0.4375
178	1	2	top	NA	19	10	19-Oct	2017	18/12/2017	NA	29	10	12	2	NA	139	14	0	178_1_2_19-Oct	0	0	0	0.4
178	1	3	bottom	NA	19	10	19-Oct	2017	18/12/2017	NA	29	16	16	0	NA	122	14	0	178_1_3_19-Oct	0	0	0	0.8125
178	1	3	top	NA	19	10	19-Oct	2017	18/12/2017	NA	29	8	8	0	NA	123	14	0	178_1_3_19-Oct	0	0	0	1
178	1	4	bottom	NA	19	10	19-Oct	2017	18/12/2017	NA	29	20	20	0	NA	124	14	0	178_1_4_19-Oct	0	0	0	1
178	1	4	top	NA	19	10	19-Oct	2017	18/12/2017	NA	29	7	7	0	NA	125	14	0	178_1_4_19-Oct	0	0	0	1
178	1	5	bottom	NA	19	10	19-Oct	2017	18/12/2017	NA	29	19	19	0	NA	126	14	0	178_1_5_19-Oct	0	0	0	1
178	1	5	top	NA	19	10	19-Oct	2017	18/12/2017	NA	29	14	14	0	NA	127	14	0	178_1_5_19-Oct	0	0	0	1
178	1	6	bottom	NA	19	10	19-Oct	2017	18/12/2017	NA	29	19	19	0	NA	128	14	0	178_1_6_19-Oct	0	0	0	0.894736842105263
178	1	6	top	NA	19	10	19-Oct	2017	18/12/2017	NA	29	10	10	0	NA	129	14	0	178_1_6_19-Oct	0	0	0	0.8
178	1	7	bottom	NA	19	10	19-Oct	2017	18/12/2017	NA	29	19	19	0	NA	130	14	0	178_1_7_19-Oct	0	0	0	0.947368421052632
178	1	7	top	NA	19	10	19-Oct	2017	18/12/2017	NA	29	15	15	0	NA	131	14	0	178_1_7_19-Oct	0	0	0	1
178	1	8	bottom	NA	19	10	19-Oct	2017	18/12/2017	NA	29	21	21	0	NA	132	14	0	178_1_8_19-Oct	0	0	0	1
178	1	8	top	NA	19	10	19-Oct	2017	18/12/2017	NA	29	22	22	0	NA	133	14	0	178_1_8_19-Oct	0	0	0	0.954545454545455
178	1	9	bottom	NA	19	10	19-Oct	2017	18/12/2017	NA	29	21	23	2	NA	134	14	0	178_1_9_19-Oct	0	0	0	1
178	1	9	top	NA	19	10	19-Oct	2017	18/12/2017	NA	29	13	15	2	NA	135	14	0	178_1_9_19-Oct	0	0	0	1
178	2	1	bottom	NA	19	10	19-Oct	2017	18/12/2017	NA	29	10	10	0	NA	140	14	0	178_2_1_19-Oct	0	0	0	0.1
178	2	1	top	NA	19	10	19-Oct	2017	18/12/2017	NA	29	13	13	0	NA	141	14	0	178_2_1_19-Oct	0	0	0	0.615384615384615
178	2	10	bottom	NA	19	10	19-Oct	2017	18/12/2017	NA	29	16	16	0	NA	156	14	0	178_2_10_19-Oct	0	0	0	0.1875
178	2	10	top	NA	19	10	19-Oct	2017	18/12/2017	NA	29	22	22	0	NA	157	14	0	178_2_10_19-Oct	0	0	0	0.954545454545454
178	2	2	bottom	NA	19	10	19-Oct	2017	18/12/2017	NA	29	19	19	0	NA	158	14	0	178_2_2_19-Oct	0	0	0	0.894736842105263
178	2	2	top	NA	19	10	19-Oct	2017	18/12/2017	NA	29	20	20	0	NA	159	14	0	178_2_2_19-Oct	0	0	0	1
178	2	3	bottom	NA	19	10	19-Oct	2017	18/12/2017	NA	29	16	16	0	NA	142	14	0	178_2_3_19-Oct	0	0	0	0.1875
178	2	3	top	NA	19	10	19-Oct	2017	18/12/2017	NA	29	16	16	0	NA	143	14	0	178_2_3_19-Oct	0	0	0	0.5
178	2	4	bottom	NA	19	10	19-Oct	2017	18/12/2017	NA	29	26	26	0	NA	144	14	0	178_2_4_19-Oct	0	0	0	0.576923076923077
178	2	4	top	NA	19	10	19-Oct	2017	18/12/2017	NA	29	16	16	0	NA	145	14	0	178_2_4_19-Oct	0	0	0	0.9375
178	2	5	bottom	NA	19	10	19-Oct	2017	18/12/2017	NA	29	20	20	0	NA	146	14	0	178_2_5_19-Oct	0	0	0	1
178	2	5	top	NA	19	10	19-Oct	2017	18/12/2017	NA	29	8	8	0	NA	147	14	0	178_2_5_19-Oct	0	0	0	1
178	2	6	bottom	NA	19	10	19-Oct	2017	18/12/2017	NA	29	19	19	0	NA	148	14	0	178_2_6_19-Oct	0	0	0	0.631578947368421
178	2	6	top	NA	19	10	19-Oct	2017	18/12/2017	NA	29	24	24	0	NA	149	14	0	178_2_6_19-Oct	0	0	0	0.958333333333333
178	2	7	bottom	NA	19	10	19-Oct	2017	18/12/2017	NA	29	20	20	0	NA	150	14	0	178_2_7_19-Oct	0	0	0	1
178	2	7	top	NA	19	10	19-Oct	2017	18/12/2017	NA	29	21	21	0	NA	151	14	0	178_2_7_19-Oct	0	0	0	1
178	2	8	bottom	NA	19	10	19-Oct	2017	18/12/2017	NA	29	15	15	0	NA	152	14	0	178_2_8_19-Oct	0	0	0	0.866666666666667
178	2	8	top	NA	19	10	19-Oct	2017	18/12/2017	NA	29	17	17	0	NA	153	14	0	178_2_8_19-Oct	0	0	0	1
178	2	9	bottom	NA	19	10	19-Oct	2017	18/12/2017	NA	29	18	18	0	NA	154	14	0	178_2_9_19-Oct	0	0	0	0.722222222222222
178	2	9	top	NA	19	10	19-Oct	2017	18/12/2017	NA	29	19	19	0	NA	155	14	0	178_2_9_19-Oct	0	0	0	0.947368421052632
178	1	1	bottom	NA	19	10	19-Oct	2017	18/12/2017	NA	29	15	19	4	NA	120	15	0	178_1_1_19-Oct	0	0	0	1
178	1	1	top	NA	19	10	19-Oct	2017	18/12/2017	NA	29	18	18	0	NA	121	15	0	178_1_1_19-Oct	0	0	0	1
178	1	10	bottom	NA	19	10	19-Oct	2017	18/12/2017	NA	29	23	23	0	NA	136	15	0	178_1_10_19-Oct	0	0	0	0.956521739130435
178	1	10	top	NA	19	10	19-Oct	2017	18/12/2017	NA	29	19	19	0	NA	137	15	0	178_1_10_19-Oct	0	0	0	0.947368421052632
178	1	2	bottom	NA	19	10	19-Oct	2017	18/12/2017	NA	29	16	19	3	NA	138	15	0	178_1_2_19-Oct	0	0	0	0.4375
178	1	2	top	NA	19	10	19-Oct	2017	18/12/2017	NA	29	10	12	2	NA	139	15	0	178_1_2_19-Oct	0	0	0	0.4
178	1	3	bottom	NA	19	10	19-Oct	2017	18/12/2017	NA	29	16	16	0	NA	122	15	0	178_1_3_19-Oct	0	0	0	0.8125
178	1	3	top	NA	19	10	19-Oct	2017	18/12/2017	NA	29	8	8	0	NA	123	15	0	178_1_3_19-Oct	0	0	0	1
178	1	4	bottom	NA	19	10	19-Oct	2017	18/12/2017	NA	29	20	20	0	NA	124	15	0	178_1_4_19-Oct	0	0	0	1
178	1	4	top	NA	19	10	19-Oct	2017	18/12/2017	NA	29	7	7	0	NA	125	15	0	178_1_4_19-Oct	0	0	0	1
178	1	5	bottom	NA	19	10	19-Oct	2017	18/12/2017	NA	29	19	19	0	NA	126	15	0	178_1_5_19-Oct	0	0	0	1
178	1	5	top	NA	19	10	19-Oct	2017	18/12/2017	NA	29	14	14	0	NA	127	15	0	178_1_5_19-Oct	0	0	0	1
178	1	6	bottom	NA	19	10	19-Oct	2017	18/12/2017	NA	29	19	19	0	NA	128	15	0	178_1_6_19-Oct	0	0	0	0.894736842105263
178	1	6	top	NA	19	10	19-Oct	2017	18/12/2017	NA	29	10	10	0	NA	129	15	0	178_1_6_19-Oct	0	0	0	0.8
178	1	7	bottom	NA	19	10	19-Oct	2017	18/12/2017	NA	29	19	19	0	NA	130	15	0	178_1_7_19-Oct	0	0	0	0.947368421052632
178	1	7	top	NA	19	10	19-Oct	2017	18/12/2017	NA	29	15	15	0	NA	131	15	0	178_1_7_19-Oct	0	0	0	1
178	1	8	bottom	NA	19	10	19-Oct	2017	18/12/2017	NA	29	21	21	0	NA	132	15	0	178_1_8_19-Oct	0	0	0	1
178	1	8	top	NA	19	10	19-Oct	2017	18/12/2017	NA	29	22	22	0	NA	133	15	0	178_1_8_19-Oct	0	0	0	0.954545454545455
178	1	9	bottom	NA	19	10	19-Oct	2017	18/12/2017	NA	29	21	23	2	NA	134	15	0	178_1_9_19-Oct	0	0	0	1
178	1	9	top	NA	19	10	19-Oct	2017	18/12/2017	NA	29	13	15	2	NA	135	15	0	178_1_9_19-Oct	0	0	0	1
178	2	1	bottom	NA	19	10	19-Oct	2017	18/12/2017	NA	29	10	10	0	NA	140	15	0	178_2_1_19-Oct	0	0	0	0.1
178	2	1	top	NA	19	10	19-Oct	2017	18/12/2017	NA	29	13	13	0	NA	141	15	0	178_2_1_19-Oct	0	0	0	0.615384615384615
178	2	10	bottom	NA	19	10	19-Oct	2017	18/12/2017	NA	29	16	16	0	NA	156	15	0	178_2_10_19-Oct	0	0	0	0.1875
178	2	10	top	NA	19	10	19-Oct	2017	18/12/2017	NA	29	22	22	0	NA	157	15	0	178_2_10_19-Oct	0	0	0	0.954545454545454
178	2	2	bottom	NA	19	10	19-Oct	2017	18/12/2017	NA	29	19	19	0	NA	158	15	0	178_2_2_19-Oct	0	0	0	0.894736842105263
178	2	2	top	NA	19	10	19-Oct	2017	18/12/2017	NA	29	20	20	0	NA	159	15	0	178_2_2_19-Oct	0	0	0	1
178	2	3	bottom	NA	19	10	19-Oct	2017	18/12/2017	NA	29	16	16	0	NA	142	15	0	178_2_3_19-Oct	0	0	0	0.1875
178	2	3	top	NA	19	10	19-Oct	2017	18/12/2017	NA	29	16	16	0	NA	143	15	0	178_2_3_19-Oct	0	0	0	0.5
178	2	4	bottom	NA	19	10	19-Oct	2017	18/12/2017	NA	29	26	26	0	NA	144	15	0	178_2_4_19-Oct	0	0	0	0.576923076923077
178	2	4	top	NA	19	10	19-Oct	2017	18/12/2017	NA	29	16	16	0	NA	145	15	0	178_2_4_19-Oct	0	0	0	0.9375
178	2	5	bottom	NA	19	10	19-Oct	2017	18/12/2017	NA	29	20	20	0	NA	146	15	0	178_2_5_19-Oct	0	0	0	1
178	2	5	top	NA	19	10	19-Oct	2017	18/12/2017	NA	29	8	8	0	NA	147	15	0	178_2_5_19-Oct	0	0	0	1
178	2	6	bottom	NA	19	10	19-Oct	2017	18/12/2017	NA	29	19	19	0	NA	148	15	0	178_2_6_19-Oct	0	0	0	0.631578947368421
178	2	6	top	NA	19	10	19-Oct	2017	18/12/2017	NA	29	24	24	0	NA	149	15	0	178_2_6_19-Oct	0	0	0	0.958333333333333
178	2	7	bottom	NA	19	10	19-Oct	2017	18/12/2017	NA	29	20	20	0	NA	150	15	0	178_2_7_19-Oct	0	0	0	1
178	2	7	top	NA	19	10	19-Oct	2017	18/12/2017	NA	29	21	21	0	NA	151	15	0	178_2_7_19-Oct	0	0	0	1
178	2	8	bottom	NA	19	10	19-Oct	2017	18/12/2017	NA	29	15	15	0	NA	152	15	0	178_2_8_19-Oct	0	0	0	0.866666666666667
178	2	8	top	NA	19	10	19-Oct	2017	18/12/2017	NA	29	17	17	0	NA	153	15	0	178_2_8_19-Oct	0	0	0	1
178	2	9	bottom	NA	19	10	19-Oct	2017	18/12/2017	NA	29	18	18	0	NA	154	15	1	178_2_9_19-Oct	5.55555555555556	5.55555555555556	0.0555555555555556	0.777777777777778
178	2	9	top	NA	19	10	19-Oct	2017	18/12/2017	NA	29	19	19	0	NA	155	15	0	178_2_9_19-Oct	0	0	0	0.947368421052632
178	1	1	bottom	NA	19	10	19-Oct	2017	18/12/2017	NA	29	15	19	4	NA	120	16	0	178_1_1_19-Oct	0	0	0	1
178	1	1	top	NA	19	10	19-Oct	2017	18/12/2017	NA	29	18	18	0	NA	121	16	0	178_1_1_19-Oct	0	0	0	1
178	1	10	bottom	NA	19	10	19-Oct	2017	18/12/2017	NA	29	23	23	0	NA	136	16	0	178_1_10_19-Oct	0	0	0	0.956521739130435
178	1	10	top	NA	19	10	19-Oct	2017	18/12/2017	NA	29	19	19	0	NA	137	16	0	178_1_10_19-Oct	0	0	0	0.947368421052632
178	1	2	bottom	NA	19	10	19-Oct	2017	18/12/2017	NA	29	16	19	3	NA	138	16	0	178_1_2_19-Oct	0	0	0	0.4375
178	1	2	top	NA	19	10	19-Oct	2017	18/12/2017	NA	29	10	12	2	NA	139	16	0	178_1_2_19-Oct	0	0	0	0.4
178	1	3	bottom	NA	19	10	19-Oct	2017	18/12/2017	NA	29	16	16	0	NA	122	16	0	178_1_3_19-Oct	0	0	0	0.8125
178	1	3	top	NA	19	10	19-Oct	2017	18/12/2017	NA	29	8	8	0	NA	123	16	0	178_1_3_19-Oct	0	0	0	1
178	1	4	bottom	NA	19	10	19-Oct	2017	18/12/2017	NA	29	20	20	0	NA	124	16	0	178_1_4_19-Oct	0	0	0	1
178	1	4	top	NA	19	10	19-Oct	2017	18/12/2017	NA	29	7	7	0	NA	125	16	0	178_1_4_19-Oct	0	0	0	1
178	1	5	bottom	NA	19	10	19-Oct	2017	18/12/2017	NA	29	19	19	0	NA	126	16	0	178_1_5_19-Oct	0	0	0	1
178	1	5	top	NA	19	10	19-Oct	2017	18/12/2017	NA	29	14	14	0	NA	127	16	0	178_1_5_19-Oct	0	0	0	1
178	1	6	bottom	NA	19	10	19-Oct	2017	18/12/2017	NA	29	19	19	0	NA	128	16	0	178_1_6_19-Oct	0	0	0	0.894736842105263
178	1	6	top	NA	19	10	19-Oct	2017	18/12/2017	NA	29	10	10	0	NA	129	16	0	178_1_6_19-Oct	0	0	0	0.8
178	1	7	bottom	NA	19	10	19-Oct	2017	18/12/2017	NA	29	19	19	0	NA	130	16	0	178_1_7_19-Oct	0	0	0	0.947368421052632
178	1	7	top	NA	19	10	19-Oct	2017	18/12/2017	NA	29	15	15	0	NA	131	16	0	178_1_7_19-Oct	0	0	0	1
178	1	8	bottom	NA	19	10	19-Oct	2017	18/12/2017	NA	29	21	21	0	NA	132	16	0	178_1_8_19-Oct	0	0	0	1
178	1	8	top	NA	19	10	19-Oct	2017	18/12/2017	NA	29	22	22	0	NA	133	16	0	178_1_8_19-Oct	0	0	0	0.954545454545455
178	1	9	bottom	NA	19	10	19-Oct	2017	18/12/2017	NA	29	21	23	2	NA	134	16	0	178_1_9_19-Oct	0	0	0	1
178	1	9	top	NA	19	10	19-Oct	2017	18/12/2017	NA	29	13	15	2	NA	135	16	0	178_1_9_19-Oct	0	0	0	1
178	2	1	bottom	NA	19	10	19-Oct	2017	18/12/2017	NA	29	10	10	0	NA	140	16	0	178_2_1_19-Oct	0	0	0	0.1
178	2	1	top	NA	19	10	19-Oct	2017	18/12/2017	NA	29	13	13	0	NA	141	16	0	178_2_1_19-Oct	0	0	0	0.615384615384615
178	2	10	bottom	NA	19	10	19-Oct	2017	18/12/2017	NA	29	16	16	0	NA	156	16	0	178_2_10_19-Oct	0	0	0	0.1875
178	2	10	top	NA	19	10	19-Oct	2017	18/12/2017	NA	29	22	22	0	NA	157	16	1	178_2_10_19-Oct	4.54545454545455	4.54545454545455	0.0454545454545455	1
178	2	2	bottom	NA	19	10	19-Oct	2017	18/12/2017	NA	29	19	19	0	NA	158	16	0	178_2_2_19-Oct	0	0	0	0.894736842105263
178	2	2	top	NA	19	10	19-Oct	2017	18/12/2017	NA	29	20	20	0	NA	159	16	0	178_2_2_19-Oct	0	0	0	1
178	2	3	bottom	NA	19	10	19-Oct	2017	18/12/2017	NA	29	16	16	0	NA	142	16	0	178_2_3_19-Oct	0	0	0	0.1875
178	2	3	top	NA	19	10	19-Oct	2017	18/12/2017	NA	29	16	16	0	NA	143	16	0	178_2_3_19-Oct	0	0	0	0.5
178	2	4	bottom	NA	19	10	19-Oct	2017	18/12/2017	NA	29	26	26	0	NA	144	16	0	178_2_4_19-Oct	0	0	0	0.576923076923077
178	2	4	top	NA	19	10	19-Oct	2017	18/12/2017	NA	29	16	16	0	NA	145	16	0	178_2_4_19-Oct	0	0	0	0.9375
178	2	5	bottom	NA	19	10	19-Oct	2017	18/12/2017	NA	29	20	20	0	NA	146	16	0	178_2_5_19-Oct	0	0	0	1
178	2	5	top	NA	19	10	19-Oct	2017	18/12/2017	NA	29	8	8	0	NA	147	16	0	178_2_5_19-Oct	0	0	0	1
178	2	6	bottom	NA	19	10	19-Oct	2017	18/12/2017	NA	29	19	19	0	NA	148	16	0	178_2_6_19-Oct	0	0	0	0.631578947368421
178	2	6	top	NA	19	10	19-Oct	2017	18/12/2017	NA	29	24	24	0	NA	149	16	0	178_2_6_19-Oct	0	0	0	0.958333333333333
178	2	7	bottom	NA	19	10	19-Oct	2017	18/12/2017	NA	29	20	20	0	NA	150	16	0	178_2_7_19-Oct	0	0	0	1
178	2	7	top	NA	19	10	19-Oct	2017	18/12/2017	NA	29	21	21	0	NA	151	16	0	178_2_7_19-Oct	0	0	0	1
178	2	8	bottom	NA	19	10	19-Oct	2017	18/12/2017	NA	29	15	15	0	NA	152	16	0	178_2_8_19-Oct	0	0	0	0.866666666666667
178	2	8	top	NA	19	10	19-Oct	2017	18/12/2017	NA	29	17	17	0	NA	153	16	0	178_2_8_19-Oct	0	0	0	1
178	2	9	bottom	NA	19	10	19-Oct	2017	18/12/2017	NA	29	18	18	0	NA	154	16	0	178_2_9_19-Oct	0	0	0	0.777777777777778
178	2	9	top	NA	19	10	19-Oct	2017	18/12/2017	NA	29	19	19	0	NA	155	16	0	178_2_9_19-Oct	0	0	0	0.947368421052632
178	1	1	bottom	NA	19	10	19-Oct	2017	18/12/2017	NA	29	15	19	4	NA	120	17	0	178_1_1_19-Oct	0	0	0	1
178	1	1	top	NA	19	10	19-Oct	2017	18/12/2017	NA	29	18	18	0	NA	121	17	0	178_1_1_19-Oct	0	0	0	1
178	1	10	bottom	NA	19	10	19-Oct	2017	18/12/2017	NA	29	23	23	0	NA	136	17	0	178_1_10_19-Oct	0	0	0	0.956521739130435
178	1	10	top	NA	19	10	19-Oct	2017	18/12/2017	NA	29	19	19	0	NA	137	17	0	178_1_10_19-Oct	0	0	0	0.947368421052632
178	1	2	bottom	NA	19	10	19-Oct	2017	18/12/2017	NA	29	16	19	3	NA	138	17	0	178_1_2_19-Oct	0	0	0	0.4375
178	1	2	top	NA	19	10	19-Oct	2017	18/12/2017	NA	29	10	12	2	NA	139	17	0	178_1_2_19-Oct	0	0	0	0.4
178	1	3	bottom	NA	19	10	19-Oct	2017	18/12/2017	NA	29	16	16	0	NA	122	17	0	178_1_3_19-Oct	0	0	0	0.8125
178	1	3	top	NA	19	10	19-Oct	2017	18/12/2017	NA	29	8	8	0	NA	123	17	0	178_1_3_19-Oct	0	0	0	1
178	1	4	bottom	NA	19	10	19-Oct	2017	18/12/2017	NA	29	20	20	0	NA	124	17	0	178_1_4_19-Oct	0	0	0	1
178	1	4	top	NA	19	10	19-Oct	2017	18/12/2017	NA	29	7	7	0	NA	125	17	0	178_1_4_19-Oct	0	0	0	1
178	1	5	bottom	NA	19	10	19-Oct	2017	18/12/2017	NA	29	19	19	0	NA	126	17	0	178_1_5_19-Oct	0	0	0	1
178	1	5	top	NA	19	10	19-Oct	2017	18/12/2017	NA	29	14	14	0	NA	127	17	0	178_1_5_19-Oct	0	0	0	1
178	1	6	bottom	NA	19	10	19-Oct	2017	18/12/2017	NA	29	19	19	0	NA	128	17	0	178_1_6_19-Oct	0	0	0	0.894736842105263
178	1	6	top	NA	19	10	19-Oct	2017	18/12/2017	NA	29	10	10	0	NA	129	17	0	178_1_6_19-Oct	0	0	0	0.8
178	1	7	bottom	NA	19	10	19-Oct	2017	18/12/2017	NA	29	19	19	0	NA	130	17	0	178_1_7_19-Oct	0	0	0	0.947368421052632
178	1	7	top	NA	19	10	19-Oct	2017	18/12/2017	NA	29	15	15	0	NA	131	17	0	178_1_7_19-Oct	0	0	0	1
178	1	8	bottom	NA	19	10	19-Oct	2017	18/12/2017	NA	29	21	21	0	NA	132	17	0	178_1_8_19-Oct	0	0	0	1
178	1	8	top	NA	19	10	19-Oct	2017	18/12/2017	NA	29	22	22	0	NA	133	17	0	178_1_8_19-Oct	0	0	0	0.954545454545455
178	1	9	bottom	NA	19	10	19-Oct	2017	18/12/2017	NA	29	21	23	2	NA	134	17	0	178_1_9_19-Oct	0	0	0	1
178	1	9	top	NA	19	10	19-Oct	2017	18/12/2017	NA	29	13	15	2	NA	135	17	0	178_1_9_19-Oct	0	0	0	1
178	2	1	bottom	NA	19	10	19-Oct	2017	18/12/2017	NA	29	10	10	0	NA	140	17	0	178_2_1_19-Oct	0	0	0	0.1
178	2	1	top	NA	19	10	19-Oct	2017	18/12/2017	NA	29	13	13	0	NA	141	17	0	178_2_1_19-Oct	0	0	0	0.615384615384615
178	2	10	bottom	NA	19	10	19-Oct	2017	18/12/2017	NA	29	16	16	0	NA	156	17	0	178_2_10_19-Oct	0	0	0	0.1875
178	2	10	top	NA	19	10	19-Oct	2017	18/12/2017	NA	29	22	22	0	NA	157	17	0	178_2_10_19-Oct	0	0	0	1
178	2	2	bottom	NA	19	10	19-Oct	2017	18/12/2017	NA	29	19	19	0	NA	158	17	0	178_2_2_19-Oct	0	0	0	0.894736842105263
178	2	2	top	NA	19	10	19-Oct	2017	18/12/2017	NA	29	20	20	0	NA	159	17	0	178_2_2_19-Oct	0	0	0	1
178	2	3	bottom	NA	19	10	19-Oct	2017	18/12/2017	NA	29	16	16	0	NA	142	17	0	178_2_3_19-Oct	0	0	0	0.1875
178	2	3	top	NA	19	10	19-Oct	2017	18/12/2017	NA	29	16	16	0	NA	143	17	0	178_2_3_19-Oct	0	0	0	0.5
178	2	4	bottom	NA	19	10	19-Oct	2017	18/12/2017	NA	29	26	26	0	NA	144	17	0	178_2_4_19-Oct	0	0	0	0.576923076923077
178	2	4	top	NA	19	10	19-Oct	2017	18/12/2017	NA	29	16	16	0	NA	145	17	0	178_2_4_19-Oct	0	0	0	0.9375
178	2	5	bottom	NA	19	10	19-Oct	2017	18/12/2017	NA	29	20	20	0	NA	146	17	0	178_2_5_19-Oct	0	0	0	1
178	2	5	top	NA	19	10	19-Oct	2017	18/12/2017	NA	29	8	8	0	NA	147	17	0	178_2_5_19-Oct	0	0	0	1
178	2	6	bottom	NA	19	10	19-Oct	2017	18/12/2017	NA	29	19	19	0	NA	148	17	0	178_2_6_19-Oct	0	0	0	0.631578947368421
178	2	6	top	NA	19	10	19-Oct	2017	18/12/2017	NA	29	24	24	0	NA	149	17	0	178_2_6_19-Oct	0	0	0	0.958333333333333
178	2	7	bottom	NA	19	10	19-Oct	2017	18/12/2017	NA	29	20	20	0	NA	150	17	0	178_2_7_19-Oct	0	0	0	1
178	2	7	top	NA	19	10	19-Oct	2017	18/12/2017	NA	29	21	21	0	NA	151	17	0	178_2_7_19-Oct	0	0	0	1
178	2	8	bottom	NA	19	10	19-Oct	2017	18/12/2017	NA	29	15	15	0	NA	152	17	0	178_2_8_19-Oct	0	0	0	0.866666666666667
178	2	8	top	NA	19	10	19-Oct	2017	18/12/2017	NA	29	17	17	0	NA	153	17	0	178_2_8_19-Oct	0	0	0	1
178	2	9	bottom	NA	19	10	19-Oct	2017	18/12/2017	NA	29	18	18	0	NA	154	17	0	178_2_9_19-Oct	0	0	0	0.777777777777778
178	2	9	top	NA	19	10	19-Oct	2017	18/12/2017	NA	29	19	19	0	NA	155	17	0	178_2_9_19-Oct	0	0	0	0.947368421052632
178	1	1	bottom	NA	19	10	19-Oct	2017	18/12/2017	NA	29	15	19	4	NA	120	18	0	178_1_1_19-Oct	0	0	0	1
178	1	1	top	NA	19	10	19-Oct	2017	18/12/2017	NA	29	18	18	0	NA	121	18	0	178_1_1_19-Oct	0	0	0	1
178	1	10	bottom	NA	19	10	19-Oct	2017	18/12/2017	NA	29	23	23	0	NA	136	18	0	178_1_10_19-Oct	0	0	0	0.956521739130435
178	1	10	top	NA	19	10	19-Oct	2017	18/12/2017	NA	29	19	19	0	NA	137	18	0	178_1_10_19-Oct	0	0	0	0.947368421052632
178	1	2	bottom	NA	19	10	19-Oct	2017	18/12/2017	NA	29	16	19	3	NA	138	18	0	178_1_2_19-Oct	0	0	0	0.4375
178	1	2	top	NA	19	10	19-Oct	2017	18/12/2017	NA	29	10	12	2	NA	139	18	0	178_1_2_19-Oct	0	0	0	0.4
178	1	3	bottom	NA	19	10	19-Oct	2017	18/12/2017	NA	29	16	16	0	NA	122	18	0	178_1_3_19-Oct	0	0	0	0.8125
178	1	3	top	NA	19	10	19-Oct	2017	18/12/2017	NA	29	8	8	0	NA	123	18	0	178_1_3_19-Oct	0	0	0	1
178	1	4	bottom	NA	19	10	19-Oct	2017	18/12/2017	NA	29	20	20	0	NA	124	18	0	178_1_4_19-Oct	0	0	0	1
178	1	4	top	NA	19	10	19-Oct	2017	18/12/2017	NA	29	7	7	0	NA	125	18	0	178_1_4_19-Oct	0	0	0	1
178	1	5	bottom	NA	19	10	19-Oct	2017	18/12/2017	NA	29	19	19	0	NA	126	18	0	178_1_5_19-Oct	0	0	0	1
178	1	5	top	NA	19	10	19-Oct	2017	18/12/2017	NA	29	14	14	0	NA	127	18	0	178_1_5_19-Oct	0	0	0	1
178	1	6	bottom	NA	19	10	19-Oct	2017	18/12/2017	NA	29	19	19	0	NA	128	18	0	178_1_6_19-Oct	0	0	0	0.894736842105263
178	1	6	top	NA	19	10	19-Oct	2017	18/12/2017	NA	29	10	10	0	NA	129	18	0	178_1_6_19-Oct	0	0	0	0.8
178	1	7	bottom	NA	19	10	19-Oct	2017	18/12/2017	NA	29	19	19	0	NA	130	18	0	178_1_7_19-Oct	0	0	0	0.947368421052632
178	1	7	top	NA	19	10	19-Oct	2017	18/12/2017	NA	29	15	15	0	NA	131	18	0	178_1_7_19-Oct	0	0	0	1
178	1	8	bottom	NA	19	10	19-Oct	2017	18/12/2017	NA	29	21	21	0	NA	132	18	0	178_1_8_19-Oct	0	0	0	1
178	1	8	top	NA	19	10	19-Oct	2017	18/12/2017	NA	29	22	22	0	NA	133	18	0	178_1_8_19-Oct	0	0	0	0.954545454545455
178	1	9	bottom	NA	19	10	19-Oct	2017	18/12/2017	NA	29	21	23	2	NA	134	18	0	178_1_9_19-Oct	0	0	0	1
178	1	9	top	NA	19	10	19-Oct	2017	18/12/2017	NA	29	13	15	2	NA	135	18	0	178_1_9_19-Oct	0	0	0	1
178	2	1	bottom	NA	19	10	19-Oct	2017	18/12/2017	NA	29	10	10	0	NA	140	18	0	178_2_1_19-Oct	0	0	0	0.1
178	2	1	top	NA	19	10	19-Oct	2017	18/12/2017	NA	29	13	13	0	NA	141	18	0	178_2_1_19-Oct	0	0	0	0.615384615384615
178	2	10	bottom	NA	19	10	19-Oct	2017	18/12/2017	NA	29	16	16	0	NA	156	18	0	178_2_10_19-Oct	0	0	0	0.1875
178	2	10	top	NA	19	10	19-Oct	2017	18/12/2017	NA	29	22	22	0	NA	157	18	0	178_2_10_19-Oct	0	0	0	1
178	2	2	bottom	NA	19	10	19-Oct	2017	18/12/2017	NA	29	19	19	0	NA	158	18	0	178_2_2_19-Oct	0	0	0	0.894736842105263
178	2	2	top	NA	19	10	19-Oct	2017	18/12/2017	NA	29	20	20	0	NA	159	18	0	178_2_2_19-Oct	0	0	0	1
178	2	3	bottom	NA	19	10	19-Oct	2017	18/12/2017	NA	29	16	16	0	NA	142	18	0	178_2_3_19-Oct	0	0	0	0.1875
178	2	3	top	NA	19	10	19-Oct	2017	18/12/2017	NA	29	16	16	0	NA	143	18	0	178_2_3_19-Oct	0	0	0	0.5
178	2	4	bottom	NA	19	10	19-Oct	2017	18/12/2017	NA	29	26	26	0	NA	144	18	0	178_2_4_19-Oct	0	0	0	0.576923076923077
178	2	4	top	NA	19	10	19-Oct	2017	18/12/2017	NA	29	16	16	0	NA	145	18	0	178_2_4_19-Oct	0	0	0	0.9375
178	2	5	bottom	NA	19	10	19-Oct	2017	18/12/2017	NA	29	20	20	0	NA	146	18	0	178_2_5_19-Oct	0	0	0	1
178	2	5	top	NA	19	10	19-Oct	2017	18/12/2017	NA	29	8	8	0	NA	147	18	0	178_2_5_19-Oct	0	0	0	1
178	2	6	bottom	NA	19	10	19-Oct	2017	18/12/2017	NA	29	19	19	0	NA	148	18	0	178_2_6_19-Oct	0	0	0	0.631578947368421
178	2	6	top	NA	19	10	19-Oct	2017	18/12/2017	NA	29	24	24	0	NA	149	18	0	178_2_6_19-Oct	0	0	0	0.958333333333333
178	2	7	bottom	NA	19	10	19-Oct	2017	18/12/2017	NA	29	20	20	0	NA	150	18	0	178_2_7_19-Oct	0	0	0	1
178	2	7	top	NA	19	10	19-Oct	2017	18/12/2017	NA	29	21	21	0	NA	151	18	0	178_2_7_19-Oct	0	0	0	1
178	2	8	bottom	NA	19	10	19-Oct	2017	18/12/2017	NA	29	15	15	0	NA	152	18	0	178_2_8_19-Oct	0	0	0	0.866666666666667
178	2	8	top	NA	19	10	19-Oct	2017	18/12/2017	NA	29	17	17	0	NA	153	18	0	178_2_8_19-Oct	0	0	0	1
178	2	9	bottom	NA	19	10	19-Oct	2017	18/12/2017	NA	29	18	18	0	NA	154	18	0	178_2_9_19-Oct	0	0	0	0.777777777777778
178	2	9	top	NA	19	10	19-Oct	2017	18/12/2017	NA	29	19	19	0	NA	155	18	0	178_2_9_19-Oct	0	0	0	0.947368421052632
178	1	1	bottom	NA	19	10	19-Oct	2017	18/12/2017	NA	29	15	19	4	NA	120	19	0	178_1_1_19-Oct	0	0	0	1
178	1	1	top	NA	19	10	19-Oct	2017	18/12/2017	NA	29	18	18	0	NA	121	19	0	178_1_1_19-Oct	0	0	0	1
178	1	10	bottom	NA	19	10	19-Oct	2017	18/12/2017	NA	29	23	23	0	NA	136	19	1	178_1_10_19-Oct	4.34782608695652	4.34782608695652	0.0434782608695652	1
178	1	10	top	NA	19	10	19-Oct	2017	18/12/2017	NA	29	19	19	0	NA	137	19	0	178_1_10_19-Oct	0	0	0	0.947368421052632
178	1	2	bottom	NA	19	10	19-Oct	2017	18/12/2017	NA	29	16	19	3	NA	138	19	0	178_1_2_19-Oct	0	0	0	0.4375
178	1	2	top	NA	19	10	19-Oct	2017	18/12/2017	NA	29	10	12	2	NA	139	19	0	178_1_2_19-Oct	0	0	0	0.4
178	1	3	bottom	NA	19	10	19-Oct	2017	18/12/2017	NA	29	16	16	0	NA	122	19	0	178_1_3_19-Oct	0	0	0	0.8125
178	1	3	top	NA	19	10	19-Oct	2017	18/12/2017	NA	29	8	8	0	NA	123	19	0	178_1_3_19-Oct	0	0	0	1
178	1	4	bottom	NA	19	10	19-Oct	2017	18/12/2017	NA	29	20	20	0	NA	124	19	0	178_1_4_19-Oct	0	0	0	1
178	1	4	top	NA	19	10	19-Oct	2017	18/12/2017	NA	29	7	7	0	NA	125	19	0	178_1_4_19-Oct	0	0	0	1
178	1	5	bottom	NA	19	10	19-Oct	2017	18/12/2017	NA	29	19	19	0	NA	126	19	0	178_1_5_19-Oct	0	0	0	1
178	1	5	top	NA	19	10	19-Oct	2017	18/12/2017	NA	29	14	14	0	NA	127	19	0	178_1_5_19-Oct	0	0	0	1
178	1	6	bottom	NA	19	10	19-Oct	2017	18/12/2017	NA	29	19	19	0	NA	128	19	0	178_1_6_19-Oct	0	0	0	0.894736842105263
178	1	6	top	NA	19	10	19-Oct	2017	18/12/2017	NA	29	10	10	0	NA	129	19	0	178_1_6_19-Oct	0	0	0	0.8
178	1	7	bottom	NA	19	10	19-Oct	2017	18/12/2017	NA	29	19	19	0	NA	130	19	0	178_1_7_19-Oct	0	0	0	0.947368421052632
178	1	7	top	NA	19	10	19-Oct	2017	18/12/2017	NA	29	15	15	0	NA	131	19	0	178_1_7_19-Oct	0	0	0	1
178	1	8	bottom	NA	19	10	19-Oct	2017	18/12/2017	NA	29	21	21	0	NA	132	19	0	178_1_8_19-Oct	0	0	0	1
178	1	8	top	NA	19	10	19-Oct	2017	18/12/2017	NA	29	22	22	0	NA	133	19	0	178_1_8_19-Oct	0	0	0	0.954545454545455
178	1	9	bottom	NA	19	10	19-Oct	2017	18/12/2017	NA	29	21	23	2	NA	134	19	0	178_1_9_19-Oct	0	0	0	1
178	1	9	top	NA	19	10	19-Oct	2017	18/12/2017	NA	29	13	15	2	NA	135	19	0	178_1_9_19-Oct	0	0	0	1
178	2	1	bottom	NA	19	10	19-Oct	2017	18/12/2017	NA	29	10	10	0	NA	140	19	0	178_2_1_19-Oct	0	0	0	0.1
178	2	1	top	NA	19	10	19-Oct	2017	18/12/2017	NA	29	13	13	0	NA	141	19	0	178_2_1_19-Oct	0	0	0	0.615384615384615
178	2	10	bottom	NA	19	10	19-Oct	2017	18/12/2017	NA	29	16	16	0	NA	156	19	0	178_2_10_19-Oct	0	0	0	0.1875
178	2	10	top	NA	19	10	19-Oct	2017	18/12/2017	NA	29	22	22	0	NA	157	19	0	178_2_10_19-Oct	0	0	0	1
178	2	2	bottom	NA	19	10	19-Oct	2017	18/12/2017	NA	29	19	19	0	NA	158	19	0	178_2_2_19-Oct	0	0	0	0.894736842105263
178	2	2	top	NA	19	10	19-Oct	2017	18/12/2017	NA	29	20	20	0	NA	159	19	0	178_2_2_19-Oct	0	0	0	1
178	2	3	bottom	NA	19	10	19-Oct	2017	18/12/2017	NA	29	16	16	0	NA	142	19	0	178_2_3_19-Oct	0	0	0	0.1875
178	2	3	top	NA	19	10	19-Oct	2017	18/12/2017	NA	29	16	16	0	NA	143	19	0	178_2_3_19-Oct	0	0	0	0.5
178	2	4	bottom	NA	19	10	19-Oct	2017	18/12/2017	NA	29	26	26	0	NA	144	19	0	178_2_4_19-Oct	0	0	0	0.576923076923077
178	2	4	top	NA	19	10	19-Oct	2017	18/12/2017	NA	29	16	16	0	NA	145	19	0	178_2_4_19-Oct	0	0	0	0.9375
178	2	5	bottom	NA	19	10	19-Oct	2017	18/12/2017	NA	29	20	20	0	NA	146	19	0	178_2_5_19-Oct	0	0	0	1
178	2	5	top	NA	19	10	19-Oct	2017	18/12/2017	NA	29	8	8	0	NA	147	19	0	178_2_5_19-Oct	0	0	0	1
178	2	6	bottom	NA	19	10	19-Oct	2017	18/12/2017	NA	29	19	19	0	NA	148	19	3	178_2_6_19-Oct	15.7894736842105	15.7894736842105	0.157894736842105	0.789473684210526
178	2	6	top	NA	19	10	19-Oct	2017	18/12/2017	NA	29	24	24	0	NA	149	19	0	178_2_6_19-Oct	0	0	0	0.958333333333333
178	2	7	bottom	NA	19	10	19-Oct	2017	18/12/2017	NA	29	20	20	0	NA	150	19	0	178_2_7_19-Oct	0	0	0	1
178	2	7	top	NA	19	10	19-Oct	2017	18/12/2017	NA	29	21	21	0	NA	151	19	0	178_2_7_19-Oct	0	0	0	1
178	2	8	bottom	NA	19	10	19-Oct	2017	18/12/2017	NA	29	15	15	0	NA	152	19	0	178_2_8_19-Oct	0	0	0	0.866666666666667
178	2	8	top	NA	19	10	19-Oct	2017	18/12/2017	NA	29	17	17	0	NA	153	19	0	178_2_8_19-Oct	0	0	0	1
178	2	9	bottom	NA	19	10	19-Oct	2017	18/12/2017	NA	29	18	18	0	NA	154	19	0	178_2_9_19-Oct	0	0	0	0.777777777777778
178	2	9	top	NA	19	10	19-Oct	2017	18/12/2017	NA	29	19	19	0	NA	155	19	0	178_2_9_19-Oct	0	0	0	0.947368421052632
178	1	1	bottom	NA	19	10	19-Oct	2017	18/12/2017	NA	29	15	19	4	NA	120	20	0	178_1_1_19-Oct	0	0	0	1
178	1	1	top	NA	19	10	19-Oct	2017	18/12/2017	NA	29	18	18	0	NA	121	20	0	178_1_1_19-Oct	0	0	0	1
178	1	10	bottom	NA	19	10	19-Oct	2017	18/12/2017	NA	29	23	23	0	NA	136	20	0	178_1_10_19-Oct	0	0	0	1
178	1	10	top	NA	19	10	19-Oct	2017	18/12/2017	NA	29	19	19	0	NA	137	20	1	178_1_10_19-Oct	5.26315789473684	5.26315789473684	0.0526315789473684	1
178	1	2	bottom	NA	19	10	19-Oct	2017	18/12/2017	NA	29	16	19	3	NA	138	20	0	178_1_2_19-Oct	0	0	0	0.4375
178	1	2	top	NA	19	10	19-Oct	2017	18/12/2017	NA	29	10	12	2	NA	139	20	0	178_1_2_19-Oct	0	0	0	0.4
178	1	3	bottom	NA	19	10	19-Oct	2017	18/12/2017	NA	29	16	16	0	NA	122	20	0	178_1_3_19-Oct	0	0	0	0.8125
178	1	3	top	NA	19	10	19-Oct	2017	18/12/2017	NA	29	8	8	0	NA	123	20	0	178_1_3_19-Oct	0	0	0	1
178	1	4	bottom	NA	19	10	19-Oct	2017	18/12/2017	NA	29	20	20	0	NA	124	20	0	178_1_4_19-Oct	0	0	0	1
178	1	4	top	NA	19	10	19-Oct	2017	18/12/2017	NA	29	7	7	0	NA	125	20	0	178_1_4_19-Oct	0	0	0	1
178	1	5	bottom	NA	19	10	19-Oct	2017	18/12/2017	NA	29	19	19	0	NA	126	20	0	178_1_5_19-Oct	0	0	0	1
178	1	5	top	NA	19	10	19-Oct	2017	18/12/2017	NA	29	14	14	0	NA	127	20	0	178_1_5_19-Oct	0	0	0	1
178	1	6	bottom	NA	19	10	19-Oct	2017	18/12/2017	NA	29	19	19	0	NA	128	20	0	178_1_6_19-Oct	0	0	0	0.894736842105263
178	1	6	top	NA	19	10	19-Oct	2017	18/12/2017	NA	29	10	10	0	NA	129	20	0	178_1_6_19-Oct	0	0	0	0.8
178	1	7	bottom	NA	19	10	19-Oct	2017	18/12/2017	NA	29	19	19	0	NA	130	20	0	178_1_7_19-Oct	0	0	0	0.947368421052632
178	1	7	top	NA	19	10	19-Oct	2017	18/12/2017	NA	29	15	15	0	NA	131	20	0	178_1_7_19-Oct	0	0	0	1
178	1	8	bottom	NA	19	10	19-Oct	2017	18/12/2017	NA	29	21	21	0	NA	132	20	0	178_1_8_19-Oct	0	0	0	1
178	1	8	top	NA	19	10	19-Oct	2017	18/12/2017	NA	29	22	22	0	NA	133	20	0	178_1_8_19-Oct	0	0	0	0.954545454545455
178	1	9	bottom	NA	19	10	19-Oct	2017	18/12/2017	NA	29	21	23	2	NA	134	20	0	178_1_9_19-Oct	0	0	0	1
178	1	9	top	NA	19	10	19-Oct	2017	18/12/2017	NA	29	13	15	2	NA	135	20	0	178_1_9_19-Oct	0	0	0	1
178	2	1	bottom	NA	19	10	19-Oct	2017	18/12/2017	NA	29	10	10	0	NA	140	20	0	178_2_1_19-Oct	0	0	0	0.1
178	2	1	top	NA	19	10	19-Oct	2017	18/12/2017	NA	29	13	13	0	NA	141	20	0	178_2_1_19-Oct	0	0	0	0.615384615384615
178	2	10	bottom	NA	19	10	19-Oct	2017	18/12/2017	NA	29	16	16	0	NA	156	20	0	178_2_10_19-Oct	0	0	0	0.1875
178	2	10	top	NA	19	10	19-Oct	2017	18/12/2017	NA	29	22	22	0	NA	157	20	0	178_2_10_19-Oct	0	0	0	1
178	2	2	bottom	NA	19	10	19-Oct	2017	18/12/2017	NA	29	19	19	0	NA	158	20	0	178_2_2_19-Oct	0	0	0	0.894736842105263
178	2	2	top	NA	19	10	19-Oct	2017	18/12/2017	NA	29	20	20	0	NA	159	20	0	178_2_2_19-Oct	0	0	0	1
178	2	3	bottom	NA	19	10	19-Oct	2017	18/12/2017	NA	29	16	16	0	NA	142	20	0	178_2_3_19-Oct	0	0	0	0.1875
178	2	3	top	NA	19	10	19-Oct	2017	18/12/2017	NA	29	16	16	0	NA	143	20	0	178_2_3_19-Oct	0	0	0	0.5
178	2	4	bottom	NA	19	10	19-Oct	2017	18/12/2017	NA	29	26	26	0	NA	144	20	1	178_2_4_19-Oct	3.84615384615385	3.84615384615385	0.0384615384615385	0.615384615384615
178	2	4	top	NA	19	10	19-Oct	2017	18/12/2017	NA	29	16	16	0	NA	145	20	0	178_2_4_19-Oct	0	0	0	0.9375
178	2	5	bottom	NA	19	10	19-Oct	2017	18/12/2017	NA	29	20	20	0	NA	146	20	0	178_2_5_19-Oct	0	0	0	1
178	2	5	top	NA	19	10	19-Oct	2017	18/12/2017	NA	29	8	8	0	NA	147	20	0	178_2_5_19-Oct	0	0	0	1
178	2	6	bottom	NA	19	10	19-Oct	2017	18/12/2017	NA	29	19	19	0	NA	148	20	1	178_2_6_19-Oct	5.26315789473684	5.26315789473684	0.0526315789473684	0.842105263157895
178	2	6	top	NA	19	10	19-Oct	2017	18/12/2017	NA	29	24	24	0	NA	149	20	0	178_2_6_19-Oct	0	0	0	0.958333333333333
178	2	7	bottom	NA	19	10	19-Oct	2017	18/12/2017	NA	29	20	20	0	NA	150	20	0	178_2_7_19-Oct	0	0	0	1
178	2	7	top	NA	19	10	19-Oct	2017	18/12/2017	NA	29	21	21	0	NA	151	20	0	178_2_7_19-Oct	0	0	0	1
178	2	8	bottom	NA	19	10	19-Oct	2017	18/12/2017	NA	29	15	15	0	NA	152	20	0	178_2_8_19-Oct	0	0	0	0.866666666666667
178	2	8	top	NA	19	10	19-Oct	2017	18/12/2017	NA	29	17	17	0	NA	153	20	0	178_2_8_19-Oct	0	0	0	1
178	2	9	bottom	NA	19	10	19-Oct	2017	18/12/2017	NA	29	18	18	0	NA	154	20	0	178_2_9_19-Oct	0	0	0	0.777777777777778
178	2	9	top	NA	19	10	19-Oct	2017	18/12/2017	NA	29	19	19	0	NA	155	20	0	178_2_9_19-Oct	0	0	0	0.947368421052632
178	1	1	bottom	NA	19	10	19-Oct	2017	18/12/2017	NA	29	15	19	4	NA	120	21	0	178_1_1_19-Oct	0	0	0	1
178	1	1	top	NA	19	10	19-Oct	2017	18/12/2017	NA	29	18	18	0	NA	121	21	0	178_1_1_19-Oct	0	0	0	1
178	1	10	bottom	NA	19	10	19-Oct	2017	18/12/2017	NA	29	23	23	0	NA	136	21	0	178_1_10_19-Oct	0	0	0	1
178	1	10	top	NA	19	10	19-Oct	2017	18/12/2017	NA	29	19	19	0	NA	137	21	0	178_1_10_19-Oct	0	0	0	1
178	1	2	bottom	NA	19	10	19-Oct	2017	18/12/2017	NA	29	16	19	3	NA	138	21	0	178_1_2_19-Oct	0	0	0	0.4375
178	1	2	top	NA	19	10	19-Oct	2017	18/12/2017	NA	29	10	12	2	NA	139	21	0	178_1_2_19-Oct	0	0	0	0.4
178	1	3	bottom	NA	19	10	19-Oct	2017	18/12/2017	NA	29	16	16	0	NA	122	21	0	178_1_3_19-Oct	0	0	0	0.8125
178	1	3	top	NA	19	10	19-Oct	2017	18/12/2017	NA	29	8	8	0	NA	123	21	0	178_1_3_19-Oct	0	0	0	1
178	1	4	bottom	NA	19	10	19-Oct	2017	18/12/2017	NA	29	20	20	0	NA	124	21	0	178_1_4_19-Oct	0	0	0	1
178	1	4	top	NA	19	10	19-Oct	2017	18/12/2017	NA	29	7	7	0	NA	125	21	0	178_1_4_19-Oct	0	0	0	1
178	1	5	bottom	NA	19	10	19-Oct	2017	18/12/2017	NA	29	19	19	0	NA	126	21	0	178_1_5_19-Oct	0	0	0	1
178	1	5	top	NA	19	10	19-Oct	2017	18/12/2017	NA	29	14	14	0	NA	127	21	0	178_1_5_19-Oct	0	0	0	1
178	1	6	bottom	NA	19	10	19-Oct	2017	18/12/2017	NA	29	19	19	0	NA	128	21	0	178_1_6_19-Oct	0	0	0	0.894736842105263
178	1	6	top	NA	19	10	19-Oct	2017	18/12/2017	NA	29	10	10	0	NA	129	21	0	178_1_6_19-Oct	0	0	0	0.8
178	1	7	bottom	NA	19	10	19-Oct	2017	18/12/2017	NA	29	19	19	0	NA	130	21	0	178_1_7_19-Oct	0	0	0	0.947368421052632
178	1	7	top	NA	19	10	19-Oct	2017	18/12/2017	NA	29	15	15	0	NA	131	21	0	178_1_7_19-Oct	0	0	0	1
178	1	8	bottom	NA	19	10	19-Oct	2017	18/12/2017	NA	29	21	21	0	NA	132	21	0	178_1_8_19-Oct	0	0	0	1
178	1	8	top	NA	19	10	19-Oct	2017	18/12/2017	NA	29	22	22	0	NA	133	21	0	178_1_8_19-Oct	0	0	0	0.954545454545455
178	1	9	bottom	NA	19	10	19-Oct	2017	18/12/2017	NA	29	21	23	2	NA	134	21	0	178_1_9_19-Oct	0	0	0	1
178	1	9	top	NA	19	10	19-Oct	2017	18/12/2017	NA	29	13	15	2	NA	135	21	0	178_1_9_19-Oct	0	0	0	1
178	2	1	bottom	NA	19	10	19-Oct	2017	18/12/2017	NA	29	10	10	0	NA	140	21	0	178_2_1_19-Oct	0	0	0	0.1
178	2	1	top	NA	19	10	19-Oct	2017	18/12/2017	NA	29	13	13	0	NA	141	21	0	178_2_1_19-Oct	0	0	0	0.615384615384615
178	2	10	bottom	NA	19	10	19-Oct	2017	18/12/2017	NA	29	16	16	0	NA	156	21	0	178_2_10_19-Oct	0	0	0	0.1875
178	2	10	top	NA	19	10	19-Oct	2017	18/12/2017	NA	29	22	22	0	NA	157	21	0	178_2_10_19-Oct	0	0	0	1
178	2	2	bottom	NA	19	10	19-Oct	2017	18/12/2017	NA	29	19	19	0	NA	158	21	0	178_2_2_19-Oct	0	0	0	0.894736842105263
178	2	2	top	NA	19	10	19-Oct	2017	18/12/2017	NA	29	20	20	0	NA	159	21	0	178_2_2_19-Oct	0	0	0	1
178	2	3	bottom	NA	19	10	19-Oct	2017	18/12/2017	NA	29	16	16	0	NA	142	21	0	178_2_3_19-Oct	0	0	0	0.1875
178	2	3	top	NA	19	10	19-Oct	2017	18/12/2017	NA	29	16	16	0	NA	143	21	0	178_2_3_19-Oct	0	0	0	0.5
178	2	4	bottom	NA	19	10	19-Oct	2017	18/12/2017	NA	29	26	26	0	NA	144	21	0	178_2_4_19-Oct	0	0	0	0.615384615384615
178	2	4	top	NA	19	10	19-Oct	2017	18/12/2017	NA	29	16	16	0	NA	145	21	0	178_2_4_19-Oct	0	0	0	0.9375
178	2	5	bottom	NA	19	10	19-Oct	2017	18/12/2017	NA	29	20	20	0	NA	146	21	0	178_2_5_19-Oct	0	0	0	1
178	2	5	top	NA	19	10	19-Oct	2017	18/12/2017	NA	29	8	8	0	NA	147	21	0	178_2_5_19-Oct	0	0	0	1
178	2	6	bottom	NA	19	10	19-Oct	2017	18/12/2017	NA	29	19	19	0	NA	148	21	0	178_2_6_19-Oct	0	0	0	0.842105263157895
178	2	6	top	NA	19	10	19-Oct	2017	18/12/2017	NA	29	24	24	0	NA	149	21	0	178_2_6_19-Oct	0	0	0	0.958333333333333
178	2	7	bottom	NA	19	10	19-Oct	2017	18/12/2017	NA	29	20	20	0	NA	150	21	0	178_2_7_19-Oct	0	0	0	1
178	2	7	top	NA	19	10	19-Oct	2017	18/12/2017	NA	29	21	21	0	NA	151	21	0	178_2_7_19-Oct	0	0	0	1
178	2	8	bottom	NA	19	10	19-Oct	2017	18/12/2017	NA	29	15	15	0	NA	152	21	0	178_2_8_19-Oct	0	0	0	0.866666666666667
178	2	8	top	NA	19	10	19-Oct	2017	18/12/2017	NA	29	17	17	0	NA	153	21	0	178_2_8_19-Oct	0	0	0	1
178	2	9	bottom	NA	19	10	19-Oct	2017	18/12/2017	NA	29	18	18	0	NA	154	21	0	178_2_9_19-Oct	0	0	0	0.777777777777778
178	2	9	top	NA	19	10	19-Oct	2017	18/12/2017	NA	29	19	19	0	NA	155	21	0	178_2_9_19-Oct	0	0	0	0.947368421052632
178	1	1	bottom	NA	19	10	19-Oct	2017	18/12/2017	NA	29	15	19	4	NA	120	22	0	178_1_1_19-Oct	0	0	0	1
178	1	1	top	NA	19	10	19-Oct	2017	18/12/2017	NA	29	18	18	0	NA	121	22	0	178_1_1_19-Oct	0	0	0	1
178	1	10	bottom	NA	19	10	19-Oct	2017	18/12/2017	NA	29	23	23	0	NA	136	22	0	178_1_10_19-Oct	0	0	0	1
178	1	10	top	NA	19	10	19-Oct	2017	18/12/2017	NA	29	19	19	0	NA	137	22	0	178_1_10_19-Oct	0	0	0	1
178	1	2	bottom	NA	19	10	19-Oct	2017	18/12/2017	NA	29	16	19	3	NA	138	22	0	178_1_2_19-Oct	0	0	0	0.4375
178	1	2	top	NA	19	10	19-Oct	2017	18/12/2017	NA	29	10	12	2	NA	139	22	0	178_1_2_19-Oct	0	0	0	0.4
178	1	3	bottom	NA	19	10	19-Oct	2017	18/12/2017	NA	29	16	16	0	NA	122	22	0	178_1_3_19-Oct	0	0	0	0.8125
178	1	3	top	NA	19	10	19-Oct	2017	18/12/2017	NA	29	8	8	0	NA	123	22	0	178_1_3_19-Oct	0	0	0	1
178	1	4	bottom	NA	19	10	19-Oct	2017	18/12/2017	NA	29	20	20	0	NA	124	22	0	178_1_4_19-Oct	0	0	0	1
178	1	4	top	NA	19	10	19-Oct	2017	18/12/2017	NA	29	7	7	0	NA	125	22	0	178_1_4_19-Oct	0	0	0	1
178	1	5	bottom	NA	19	10	19-Oct	2017	18/12/2017	NA	29	19	19	0	NA	126	22	0	178_1_5_19-Oct	0	0	0	1
178	1	5	top	NA	19	10	19-Oct	2017	18/12/2017	NA	29	14	14	0	NA	127	22	0	178_1_5_19-Oct	0	0	0	1
178	1	6	bottom	NA	19	10	19-Oct	2017	18/12/2017	NA	29	19	19	0	NA	128	22	0	178_1_6_19-Oct	0	0	0	0.894736842105263
178	1	6	top	NA	19	10	19-Oct	2017	18/12/2017	NA	29	10	10	0	NA	129	22	0	178_1_6_19-Oct	0	0	0	0.8
178	1	7	bottom	NA	19	10	19-Oct	2017	18/12/2017	NA	29	19	19	0	NA	130	22	0	178_1_7_19-Oct	0	0	0	0.947368421052632
178	1	7	top	NA	19	10	19-Oct	2017	18/12/2017	NA	29	15	15	0	NA	131	22	0	178_1_7_19-Oct	0	0	0	1
178	1	8	bottom	NA	19	10	19-Oct	2017	18/12/2017	NA	29	21	21	0	NA	132	22	0	178_1_8_19-Oct	0	0	0	1
178	1	8	top	NA	19	10	19-Oct	2017	18/12/2017	NA	29	22	22	0	NA	133	22	0	178_1_8_19-Oct	0	0	0	0.954545454545455
178	1	9	bottom	NA	19	10	19-Oct	2017	18/12/2017	NA	29	21	23	2	NA	134	22	0	178_1_9_19-Oct	0	0	0	1
178	1	9	top	NA	19	10	19-Oct	2017	18/12/2017	NA	29	13	15	2	NA	135	22	0	178_1_9_19-Oct	0	0	0	1
178	2	1	bottom	NA	19	10	19-Oct	2017	18/12/2017	NA	29	10	10	0	NA	140	22	0	178_2_1_19-Oct	0	0	0	0.1
178	2	1	top	NA	19	10	19-Oct	2017	18/12/2017	NA	29	13	13	0	NA	141	22	1	178_2_1_19-Oct	7.69230769230769	7.69230769230769	0.0769230769230769	0.692307692307692
178	2	10	bottom	NA	19	10	19-Oct	2017	18/12/2017	NA	29	16	16	0	NA	156	22	1	178_2_10_19-Oct	6.25	6.25	0.0625	0.25
178	2	10	top	NA	19	10	19-Oct	2017	18/12/2017	NA	29	22	22	0	NA	157	22	0	178_2_10_19-Oct	0	0	0	1
178	2	2	bottom	NA	19	10	19-Oct	2017	18/12/2017	NA	29	19	19	0	NA	158	22	0	178_2_2_19-Oct	0	0	0	0.894736842105263
178	2	2	top	NA	19	10	19-Oct	2017	18/12/2017	NA	29	20	20	0	NA	159	22	0	178_2_2_19-Oct	0	0	0	1
178	2	3	top	NA	19	10	19-Oct	2017	18/12/2017	NA	29	16	16	0	NA	143	22	0	178_2_3_19-Oct	0	0	0	0.5
178	2	4	bottom	NA	19	10	19-Oct	2017	18/12/2017	NA	29	26	26	0	NA	144	22	0	178_2_4_19-Oct	0	0	0	0.615384615384615
178	2	4	top	NA	19	10	19-Oct	2017	18/12/2017	NA	29	16	16	0	NA	145	22	0	178_2_4_19-Oct	0	0	0	0.9375
178	2	5	bottom	NA	19	10	19-Oct	2017	18/12/2017	NA	29	20	20	0	NA	146	22	0	178_2_5_19-Oct	0	0	0	1
178	2	5	top	NA	19	10	19-Oct	2017	18/12/2017	NA	29	8	8	0	NA	147	22	0	178_2_5_19-Oct	0	0	0	1
178	2	6	bottom	NA	19	10	19-Oct	2017	18/12/2017	NA	29	19	19	0	NA	148	22	0	178_2_6_19-Oct	0	0	0	0.842105263157895
178	2	6	top	NA	19	10	19-Oct	2017	18/12/2017	NA	29	24	24	0	NA	149	22	1	178_2_6_19-Oct	4.16666666666667	4.16666666666667	0.0416666666666667	1
178	2	7	bottom	NA	19	10	19-Oct	2017	18/12/2017	NA	29	20	20	0	NA	150	22	0	178_2_7_19-Oct	0	0	0	1
178	2	7	top	NA	19	10	19-Oct	2017	18/12/2017	NA	29	21	21	0	NA	151	22	0	178_2_7_19-Oct	0	0	0	1
178	2	8	bottom	NA	19	10	19-Oct	2017	18/12/2017	NA	29	15	15	0	NA	152	22	0	178_2_8_19-Oct	0	0	0	0.866666666666667
178	2	8	top	NA	19	10	19-Oct	2017	18/12/2017	NA	29	17	17	0	NA	153	22	0	178_2_8_19-Oct	0	0	0	1
178	2	9	bottom	NA	19	10	19-Oct	2017	18/12/2017	NA	29	18	18	0	NA	154	22	0	178_2_9_19-Oct	0	0	0	0.777777777777778
178	2	9	top	NA	19	10	19-Oct	2017	18/12/2017	NA	29	19	19	0	NA	155	22	0	178_2_9_19-Oct	0	0	0	0.947368421052632
178	1	1	bottom	NA	19	10	19-Oct	2017	18/12/2017	NA	29	15	19	4	NA	120	23	0	178_1_1_19-Oct	0	0	0	1
178	1	1	top	NA	19	10	19-Oct	2017	18/12/2017	NA	29	18	18	0	NA	121	23	0	178_1_1_19-Oct	0	0	0	1
178	1	10	bottom	NA	19	10	19-Oct	2017	18/12/2017	NA	29	23	23	0	NA	136	23	0	178_1_10_19-Oct	0	0	0	1
178	1	10	top	NA	19	10	19-Oct	2017	18/12/2017	NA	29	19	19	0	NA	137	23	0	178_1_10_19-Oct	0	0	0	1
178	1	2	bottom	NA	19	10	19-Oct	2017	18/12/2017	NA	29	16	19	3	NA	138	23	0	178_1_2_19-Oct	0	0	0	0.4375
178	1	2	top	NA	19	10	19-Oct	2017	18/12/2017	NA	29	10	12	2	NA	139	23	0	178_1_2_19-Oct	0	0	0	0.4
178	1	3	bottom	NA	19	10	19-Oct	2017	18/12/2017	NA	29	16	16	0	NA	122	23	0	178_1_3_19-Oct	0	0	0	0.8125
178	1	3	top	NA	19	10	19-Oct	2017	18/12/2017	NA	29	8	8	0	NA	123	23	0	178_1_3_19-Oct	0	0	0	1
178	1	4	bottom	NA	19	10	19-Oct	2017	18/12/2017	NA	29	20	20	0	NA	124	23	0	178_1_4_19-Oct	0	0	0	1
178	1	4	top	NA	19	10	19-Oct	2017	18/12/2017	NA	29	7	7	0	NA	125	23	0	178_1_4_19-Oct	0	0	0	1
178	1	5	bottom	NA	19	10	19-Oct	2017	18/12/2017	NA	29	19	19	0	NA	126	23	0	178_1_5_19-Oct	0	0	0	1
178	1	5	top	NA	19	10	19-Oct	2017	18/12/2017	NA	29	14	14	0	NA	127	23	0	178_1_5_19-Oct	0	0	0	1
178	1	6	bottom	NA	19	10	19-Oct	2017	18/12/2017	NA	29	19	19	0	NA	128	23	0	178_1_6_19-Oct	0	0	0	0.894736842105263
178	1	6	top	NA	19	10	19-Oct	2017	18/12/2017	NA	29	10	10	0	NA	129	23	0	178_1_6_19-Oct	0	0	0	0.8
178	1	7	bottom	NA	19	10	19-Oct	2017	18/12/2017	NA	29	19	19	0	NA	130	23	0	178_1_7_19-Oct	0	0	0	0.947368421052632
178	1	7	top	NA	19	10	19-Oct	2017	18/12/2017	NA	29	15	15	0	NA	131	23	0	178_1_7_19-Oct	0	0	0	1
178	1	8	bottom	NA	19	10	19-Oct	2017	18/12/2017	NA	29	21	21	0	NA	132	23	0	178_1_8_19-Oct	0	0	0	1
178	1	8	top	NA	19	10	19-Oct	2017	18/12/2017	NA	29	22	22	0	NA	133	23	0	178_1_8_19-Oct	0	0	0	0.954545454545455
178	1	9	bottom	NA	19	10	19-Oct	2017	18/12/2017	NA	29	21	23	2	NA	134	23	0	178_1_9_19-Oct	0	0	0	1
178	1	9	top	NA	19	10	19-Oct	2017	18/12/2017	NA	29	13	15	2	NA	135	23	0	178_1_9_19-Oct	0	0	0	1
178	2	1	bottom	NA	19	10	19-Oct	2017	18/12/2017	NA	29	10	10	0	NA	140	23	0	178_2_1_19-Oct	0	0	0	0.1
178	2	1	top	NA	19	10	19-Oct	2017	18/12/2017	NA	29	13	13	0	NA	141	23	0	178_2_1_19-Oct	0	0	0	0.692307692307692
178	2	10	bottom	NA	19	10	19-Oct	2017	18/12/2017	NA	29	16	16	0	NA	156	23	0	178_2_10_19-Oct	0	0	0	0.25
178	2	10	top	NA	19	10	19-Oct	2017	18/12/2017	NA	29	22	22	0	NA	157	23	0	178_2_10_19-Oct	0	0	0	1
178	2	2	bottom	NA	19	10	19-Oct	2017	18/12/2017	NA	29	19	19	0	NA	158	23	0	178_2_2_19-Oct	0	0	0	0.894736842105263
178	2	2	top	NA	19	10	19-Oct	2017	18/12/2017	NA	29	20	20	0	NA	159	23	0	178_2_2_19-Oct	0	0	0	1
178	2	3	top	NA	19	10	19-Oct	2017	18/12/2017	NA	29	16	16	0	NA	143	23	0	178_2_3_19-Oct	0	0	0	0.5
178	2	4	bottom	NA	19	10	19-Oct	2017	18/12/2017	NA	29	26	26	0	NA	144	23	1	178_2_4_19-Oct	3.84615384615385	3.84615384615385	0.0384615384615385	0.653846153846154
178	2	4	top	NA	19	10	19-Oct	2017	18/12/2017	NA	29	16	16	0	NA	145	23	0	178_2_4_19-Oct	0	0	0	0.9375
178	2	5	bottom	NA	19	10	19-Oct	2017	18/12/2017	NA	29	20	20	0	NA	146	23	0	178_2_5_19-Oct	0	0	0	1
178	2	5	top	NA	19	10	19-Oct	2017	18/12/2017	NA	29	8	8	0	NA	147	23	0	178_2_5_19-Oct	0	0	0	1
178	2	6	bottom	NA	19	10	19-Oct	2017	18/12/2017	NA	29	19	19	0	NA	148	23	0	178_2_6_19-Oct	0	0	0	0.842105263157895
178	2	6	top	NA	19	10	19-Oct	2017	18/12/2017	NA	29	24	24	0	NA	149	23	0	178_2_6_19-Oct	0	0	0	1
178	2	7	bottom	NA	19	10	19-Oct	2017	18/12/2017	NA	29	20	20	0	NA	150	23	0	178_2_7_19-Oct	0	0	0	1
178	2	7	top	NA	19	10	19-Oct	2017	18/12/2017	NA	29	21	21	0	NA	151	23	0	178_2_7_19-Oct	0	0	0	1
178	2	8	bottom	NA	19	10	19-Oct	2017	18/12/2017	NA	29	15	15	0	NA	152	23	0	178_2_8_19-Oct	0	0	0	0.866666666666667
178	2	8	top	NA	19	10	19-Oct	2017	18/12/2017	NA	29	17	17	0	NA	153	23	0	178_2_8_19-Oct	0	0	0	1
178	2	9	bottom	NA	19	10	19-Oct	2017	18/12/2017	NA	29	18	18	0	NA	154	23	0	178_2_9_19-Oct	0	0	0	0.777777777777778
178	2	9	top	NA	19	10	19-Oct	2017	18/12/2017	NA	29	19	19	0	NA	155	23	0	178_2_9_19-Oct	0	0	0	0.947368421052632
178	1	1	bottom	NA	19	10	19-Oct	2017	18/12/2017	NA	29	15	19	4	NA	120	24	0	178_1_1_19-Oct	0	0	0	1
178	1	1	top	NA	19	10	19-Oct	2017	18/12/2017	NA	29	18	18	0	NA	121	24	0	178_1_1_19-Oct	0	0	0	1
178	1	10	bottom	NA	19	10	19-Oct	2017	18/12/2017	NA	29	23	23	0	NA	136	24	0	178_1_10_19-Oct	0	0	0	1
178	1	10	top	NA	19	10	19-Oct	2017	18/12/2017	NA	29	19	19	0	NA	137	24	0	178_1_10_19-Oct	0	0	0	1
178	1	2	bottom	NA	19	10	19-Oct	2017	18/12/2017	NA	29	16	19	3	NA	138	24	0	178_1_2_19-Oct	0	0	0	0.4375
178	1	2	top	NA	19	10	19-Oct	2017	18/12/2017	NA	29	10	12	2	NA	139	24	0	178_1_2_19-Oct	0	0	0	0.4
178	1	3	bottom	NA	19	10	19-Oct	2017	18/12/2017	NA	29	16	16	0	NA	122	24	0	178_1_3_19-Oct	0	0	0	0.8125
178	1	3	top	NA	19	10	19-Oct	2017	18/12/2017	NA	29	8	8	0	NA	123	24	0	178_1_3_19-Oct	0	0	0	1
178	1	4	bottom	NA	19	10	19-Oct	2017	18/12/2017	NA	29	20	20	0	NA	124	24	0	178_1_4_19-Oct	0	0	0	1
178	1	4	top	NA	19	10	19-Oct	2017	18/12/2017	NA	29	7	7	0	NA	125	24	0	178_1_4_19-Oct	0	0	0	1
178	1	5	bottom	NA	19	10	19-Oct	2017	18/12/2017	NA	29	19	19	0	NA	126	24	0	178_1_5_19-Oct	0	0	0	1
178	1	5	top	NA	19	10	19-Oct	2017	18/12/2017	NA	29	14	14	0	NA	127	24	0	178_1_5_19-Oct	0	0	0	1
178	1	6	bottom	NA	19	10	19-Oct	2017	18/12/2017	NA	29	19	19	0	NA	128	24	0	178_1_6_19-Oct	0	0	0	0.894736842105263
178	1	6	top	NA	19	10	19-Oct	2017	18/12/2017	NA	29	10	10	0	NA	129	24	0	178_1_6_19-Oct	0	0	0	0.8
178	1	7	bottom	NA	19	10	19-Oct	2017	18/12/2017	NA	29	19	19	0	NA	130	24	0	178_1_7_19-Oct	0	0	0	0.947368421052632
178	1	7	top	NA	19	10	19-Oct	2017	18/12/2017	NA	29	15	15	0	NA	131	24	0	178_1_7_19-Oct	0	0	0	1
178	1	8	bottom	NA	19	10	19-Oct	2017	18/12/2017	NA	29	21	21	0	NA	132	24	0	178_1_8_19-Oct	0	0	0	1
178	1	8	top	NA	19	10	19-Oct	2017	18/12/2017	NA	29	22	22	0	NA	133	24	0	178_1_8_19-Oct	0	0	0	0.954545454545455
178	1	9	bottom	NA	19	10	19-Oct	2017	18/12/2017	NA	29	21	23	2	NA	134	24	0	178_1_9_19-Oct	0	0	0	1
178	1	9	top	NA	19	10	19-Oct	2017	18/12/2017	NA	29	13	15	2	NA	135	24	0	178_1_9_19-Oct	0	0	0	1
178	2	1	bottom	NA	19	10	19-Oct	2017	18/12/2017	NA	29	10	10	0	NA	140	24	0	178_2_1_19-Oct	0	0	0	0.1
178	2	1	top	NA	19	10	19-Oct	2017	18/12/2017	NA	29	13	13	0	NA	141	24	0	178_2_1_19-Oct	0	0	0	0.692307692307692
178	2	10	bottom	NA	19	10	19-Oct	2017	18/12/2017	NA	29	16	16	0	NA	156	24	0	178_2_10_19-Oct	0	0	0	0.25
178	2	10	top	NA	19	10	19-Oct	2017	18/12/2017	NA	29	22	22	0	NA	157	24	0	178_2_10_19-Oct	0	0	0	1
178	2	2	bottom	NA	19	10	19-Oct	2017	18/12/2017	NA	29	19	19	0	NA	158	24	0	178_2_2_19-Oct	0	0	0	0.894736842105263
178	2	2	top	NA	19	10	19-Oct	2017	18/12/2017	NA	29	20	20	0	NA	159	24	0	178_2_2_19-Oct	0	0	0	1
178	2	3	bottom	NA	19	10	19-Oct	2017	18/12/2017	NA	29	16	16	0	NA	142	24	0	178_2_3_19-Oct	0	0	0	0.1875
178	2	3	top	NA	19	10	19-Oct	2017	18/12/2017	NA	29	16	16	0	NA	143	24	0	178_2_3_19-Oct	0	0	0	0.5
178	2	4	bottom	NA	19	10	19-Oct	2017	18/12/2017	NA	29	26	26	0	NA	144	24	0	178_2_4_19-Oct	0	0	0	0.653846153846154
178	2	4	top	NA	19	10	19-Oct	2017	18/12/2017	NA	29	16	16	0	NA	145	24	0	178_2_4_19-Oct	0	0	0	0.9375
178	2	5	bottom	NA	19	10	19-Oct	2017	18/12/2017	NA	29	20	20	0	NA	146	24	0	178_2_5_19-Oct	0	0	0	1
178	2	5	top	NA	19	10	19-Oct	2017	18/12/2017	NA	29	8	8	0	NA	147	24	0	178_2_5_19-Oct	0	0	0	1
178	2	6	bottom	NA	19	10	19-Oct	2017	18/12/2017	NA	29	19	19	0	NA	148	24	0	178_2_6_19-Oct	0	0	0	0.842105263157895
178	2	6	top	NA	19	10	19-Oct	2017	18/12/2017	NA	29	24	24	0	NA	149	24	0	178_2_6_19-Oct	0	0	0	1
178	2	7	bottom	NA	19	10	19-Oct	2017	18/12/2017	NA	29	20	20	0	NA	150	24	0	178_2_7_19-Oct	0	0	0	1
178	2	7	top	NA	19	10	19-Oct	2017	18/12/2017	NA	29	21	21	0	NA	151	24	0	178_2_7_19-Oct	0	0	0	1
178	2	8	bottom	NA	19	10	19-Oct	2017	18/12/2017	NA	29	15	15	0	NA	152	24	0	178_2_8_19-Oct	0	0	0	0.866666666666667
178	2	8	top	NA	19	10	19-Oct	2017	18/12/2017	NA	29	17	17	0	NA	153	24	0	178_2_8_19-Oct	0	0	0	1
178	2	9	bottom	NA	19	10	19-Oct	2017	18/12/2017	NA	29	18	18	0	NA	154	24	0	178_2_9_19-Oct	0	0	0	0.777777777777778
178	2	9	top	NA	19	10	19-Oct	2017	18/12/2017	NA	29	19	19	0	NA	155	24	0	178_2_9_19-Oct	0	0	0	0.947368421052632
178	1	1	bottom	NA	19	10	19-Oct	2017	18/12/2017	NA	29	15	19	4	NA	120	25	0	178_1_1_19-Oct	0	0	0	1
178	1	1	top	NA	19	10	19-Oct	2017	18/12/2017	NA	29	18	18	0	NA	121	25	0	178_1_1_19-Oct	0	0	0	1
178	1	10	bottom	NA	19	10	19-Oct	2017	18/12/2017	NA	29	23	23	0	NA	136	25	0	178_1_10_19-Oct	0	0	0	1
178	1	10	top	NA	19	10	19-Oct	2017	18/12/2017	NA	29	19	19	0	NA	137	25	0	178_1_10_19-Oct	0	0	0	1
178	1	2	bottom	NA	19	10	19-Oct	2017	18/12/2017	NA	29	16	19	3	NA	138	25	0	178_1_2_19-Oct	0	0	0	0.4375
178	1	2	top	NA	19	10	19-Oct	2017	18/12/2017	NA	29	10	12	2	NA	139	25	0	178_1_2_19-Oct	0	0	0	0.4
178	1	3	bottom	NA	19	10	19-Oct	2017	18/12/2017	NA	29	16	16	0	NA	122	25	0	178_1_3_19-Oct	0	0	0	0.8125
178	1	3	top	NA	19	10	19-Oct	2017	18/12/2017	NA	29	8	8	0	NA	123	25	0	178_1_3_19-Oct	0	0	0	1
178	1	4	bottom	NA	19	10	19-Oct	2017	18/12/2017	NA	29	20	20	0	NA	124	25	0	178_1_4_19-Oct	0	0	0	1
178	1	4	top	NA	19	10	19-Oct	2017	18/12/2017	NA	29	7	7	0	NA	125	25	0	178_1_4_19-Oct	0	0	0	1
178	1	5	bottom	NA	19	10	19-Oct	2017	18/12/2017	NA	29	19	19	0	NA	126	25	0	178_1_5_19-Oct	0	0	0	1
178	1	5	top	NA	19	10	19-Oct	2017	18/12/2017	NA	29	14	14	0	NA	127	25	0	178_1_5_19-Oct	0	0	0	1
178	1	6	bottom	NA	19	10	19-Oct	2017	18/12/2017	NA	29	19	19	0	NA	128	25	0	178_1_6_19-Oct	0	0	0	0.894736842105263
178	1	6	top	NA	19	10	19-Oct	2017	18/12/2017	NA	29	10	10	0	NA	129	25	0	178_1_6_19-Oct	0	0	0	0.8
178	1	7	bottom	NA	19	10	19-Oct	2017	18/12/2017	NA	29	19	19	0	NA	130	25	0	178_1_7_19-Oct	0	0	0	0.947368421052632
178	1	7	top	NA	19	10	19-Oct	2017	18/12/2017	NA	29	15	15	0	NA	131	25	0	178_1_7_19-Oct	0	0	0	1
178	1	8	bottom	NA	19	10	19-Oct	2017	18/12/2017	NA	29	21	21	0	NA	132	25	0	178_1_8_19-Oct	0	0	0	1
178	1	8	top	NA	19	10	19-Oct	2017	18/12/2017	NA	29	22	22	0	NA	133	25	0	178_1_8_19-Oct	0	0	0	0.954545454545455
178	1	9	bottom	NA	19	10	19-Oct	2017	18/12/2017	NA	29	21	23	2	NA	134	25	0	178_1_9_19-Oct	0	0	0	1
178	1	9	top	NA	19	10	19-Oct	2017	18/12/2017	NA	29	13	15	2	NA	135	25	0	178_1_9_19-Oct	0	0	0	1
178	2	1	bottom	NA	19	10	19-Oct	2017	18/12/2017	NA	29	10	10	0	NA	140	25	0	178_2_1_19-Oct	0	0	0	0.1
178	2	1	top	NA	19	10	19-Oct	2017	18/12/2017	NA	29	13	13	0	NA	141	25	0	178_2_1_19-Oct	0	0	0	0.692307692307692
178	2	10	bottom	NA	19	10	19-Oct	2017	18/12/2017	NA	29	16	16	0	NA	156	25	2	178_2_10_19-Oct	12.5	12.5	0.125	0.375
178	2	10	top	NA	19	10	19-Oct	2017	18/12/2017	NA	29	22	22	0	NA	157	25	0	178_2_10_19-Oct	0	0	0	1
178	2	2	bottom	NA	19	10	19-Oct	2017	18/12/2017	NA	29	19	19	0	NA	158	25	0	178_2_2_19-Oct	0	0	0	0.894736842105263
178	2	2	top	NA	19	10	19-Oct	2017	18/12/2017	NA	29	20	20	0	NA	159	25	0	178_2_2_19-Oct	0	0	0	1
178	2	3	bottom	NA	19	10	19-Oct	2017	18/12/2017	NA	29	16	16	0	NA	142	25	0	178_2_3_19-Oct	0	0	0	0.1875
178	2	3	top	NA	19	10	19-Oct	2017	18/12/2017	NA	29	16	16	0	NA	143	25	0	178_2_3_19-Oct	0	0	0	0.5
178	2	4	bottom	NA	19	10	19-Oct	2017	18/12/2017	NA	29	26	26	0	NA	144	25	1	178_2_4_19-Oct	3.84615384615385	3.84615384615385	0.0384615384615385	0.692307692307692
178	2	4	top	NA	19	10	19-Oct	2017	18/12/2017	NA	29	16	16	0	NA	145	25	0	178_2_4_19-Oct	0	0	0	0.9375
178	2	5	bottom	NA	19	10	19-Oct	2017	18/12/2017	NA	29	20	20	0	NA	146	25	0	178_2_5_19-Oct	0	0	0	1
178	2	5	top	NA	19	10	19-Oct	2017	18/12/2017	NA	29	8	8	0	NA	147	25	0	178_2_5_19-Oct	0	0	0	1
178	2	6	bottom	NA	19	10	19-Oct	2017	18/12/2017	NA	29	19	19	0	NA	148	25	0	178_2_6_19-Oct	0	0	0	0.842105263157895
178	2	6	top	NA	19	10	19-Oct	2017	18/12/2017	NA	29	24	24	0	NA	149	25	0	178_2_6_19-Oct	0	0	0	1
178	2	7	bottom	NA	19	10	19-Oct	2017	18/12/2017	NA	29	20	20	0	NA	150	25	0	178_2_7_19-Oct	0	0	0	1
178	2	7	top	NA	19	10	19-Oct	2017	18/12/2017	NA	29	21	21	0	NA	151	25	0	178_2_7_19-Oct	0	0	0	1
178	2	8	bottom	NA	19	10	19-Oct	2017	18/12/2017	NA	29	15	15	0	NA	152	25	0	178_2_8_19-Oct	0	0	0	0.866666666666667
178	2	8	top	NA	19	10	19-Oct	2017	18/12/2017	NA	29	17	17	0	NA	153	25	0	178_2_8_19-Oct	0	0	0	1
178	2	9	bottom	NA	19	10	19-Oct	2017	18/12/2017	NA	29	18	18	0	NA	154	25	0	178_2_9_19-Oct	0	0	0	0.777777777777778
178	2	9	top	NA	19	10	19-Oct	2017	18/12/2017	NA	29	19	19	0	NA	155	25	1	178_2_9_19-Oct	5.26315789473684	5.26315789473684	0.0526315789473684	1
178	1	1	bottom	NA	19	10	19-Oct	2017	18/12/2017	NA	29	15	19	4	NA	120	26	0	178_1_1_19-Oct	0	0	0	1
178	1	1	top	NA	19	10	19-Oct	2017	18/12/2017	NA	29	18	18	0	NA	121	26	0	178_1_1_19-Oct	0	0	0	1
178	1	10	bottom	NA	19	10	19-Oct	2017	18/12/2017	NA	29	23	23	0	NA	136	26	0	178_1_10_19-Oct	0	0	0	1
178	1	10	top	NA	19	10	19-Oct	2017	18/12/2017	NA	29	19	19	0	NA	137	26	0	178_1_10_19-Oct	0	0	0	1
178	1	2	bottom	NA	19	10	19-Oct	2017	18/12/2017	NA	29	16	19	3	NA	138	26	0	178_1_2_19-Oct	0	0	0	0.4375
178	1	2	top	NA	19	10	19-Oct	2017	18/12/2017	NA	29	10	12	2	NA	139	26	0	178_1_2_19-Oct	0	0	0	0.4
178	1	3	bottom	NA	19	10	19-Oct	2017	18/12/2017	NA	29	16	16	0	NA	122	26	0	178_1_3_19-Oct	0	0	0	0.8125
178	1	3	top	NA	19	10	19-Oct	2017	18/12/2017	NA	29	8	8	0	NA	123	26	0	178_1_3_19-Oct	0	0	0	1
178	1	4	bottom	NA	19	10	19-Oct	2017	18/12/2017	NA	29	20	20	0	NA	124	26	0	178_1_4_19-Oct	0	0	0	1
178	1	4	top	NA	19	10	19-Oct	2017	18/12/2017	NA	29	7	7	0	NA	125	26	0	178_1_4_19-Oct	0	0	0	1
178	1	5	bottom	NA	19	10	19-Oct	2017	18/12/2017	NA	29	19	19	0	NA	126	26	0	178_1_5_19-Oct	0	0	0	1
178	1	5	top	NA	19	10	19-Oct	2017	18/12/2017	NA	29	14	14	0	NA	127	26	0	178_1_5_19-Oct	0	0	0	1
178	1	6	bottom	NA	19	10	19-Oct	2017	18/12/2017	NA	29	19	19	0	NA	128	26	0	178_1_6_19-Oct	0	0	0	0.894736842105263
178	1	6	top	NA	19	10	19-Oct	2017	18/12/2017	NA	29	10	10	0	NA	129	26	0	178_1_6_19-Oct	0	0	0	0.8
178	1	7	bottom	NA	19	10	19-Oct	2017	18/12/2017	NA	29	19	19	0	NA	130	26	0	178_1_7_19-Oct	0	0	0	0.947368421052632
178	1	7	top	NA	19	10	19-Oct	2017	18/12/2017	NA	29	15	15	0	NA	131	26	0	178_1_7_19-Oct	0	0	0	1
178	1	8	bottom	NA	19	10	19-Oct	2017	18/12/2017	NA	29	21	21	0	NA	132	26	0	178_1_8_19-Oct	0	0	0	1
178	1	8	top	NA	19	10	19-Oct	2017	18/12/2017	NA	29	22	22	0	NA	133	26	0	178_1_8_19-Oct	0	0	0	0.954545454545455
178	1	9	bottom	NA	19	10	19-Oct	2017	18/12/2017	NA	29	21	23	2	NA	134	26	0	178_1_9_19-Oct	0	0	0	1
178	1	9	top	NA	19	10	19-Oct	2017	18/12/2017	NA	29	13	15	2	NA	135	26	0	178_1_9_19-Oct	0	0	0	1
178	2	1	bottom	NA	19	10	19-Oct	2017	18/12/2017	NA	29	10	10	0	NA	140	26	0	178_2_1_19-Oct	0	0	0	0.1
178	2	1	top	NA	19	10	19-Oct	2017	18/12/2017	NA	29	13	13	0	NA	141	26	0	178_2_1_19-Oct	0	0	0	0.692307692307692
178	2	10	bottom	NA	19	10	19-Oct	2017	18/12/2017	NA	29	16	16	0	NA	156	26	2	178_2_10_19-Oct	12.5	12.5	0.125	0.5
178	2	10	top	NA	19	10	19-Oct	2017	18/12/2017	NA	29	22	22	0	NA	157	26	0	178_2_10_19-Oct	0	0	0	1
178	2	2	bottom	NA	19	10	19-Oct	2017	18/12/2017	NA	29	19	19	0	NA	158	26	0	178_2_2_19-Oct	0	0	0	0.894736842105263
178	2	2	top	NA	19	10	19-Oct	2017	18/12/2017	NA	29	20	20	0	NA	159	26	0	178_2_2_19-Oct	0	0	0	1
178	2	3	bottom	NA	19	10	19-Oct	2017	18/12/2017	NA	29	16	16	0	NA	142	26	0	178_2_3_19-Oct	0	0	0	0.1875
178	2	3	top	NA	19	10	19-Oct	2017	18/12/2017	NA	29	16	16	0	NA	143	26	0	178_2_3_19-Oct	0	0	0	0.5
178	2	4	bottom	NA	19	10	19-Oct	2017	18/12/2017	NA	29	26	26	0	NA	144	26	0	178_2_4_19-Oct	0	0	0	0.692307692307692
178	2	4	top	NA	19	10	19-Oct	2017	18/12/2017	NA	29	16	16	0	NA	145	26	0	178_2_4_19-Oct	0	0	0	0.9375
178	2	5	bottom	NA	19	10	19-Oct	2017	18/12/2017	NA	29	20	20	0	NA	146	26	0	178_2_5_19-Oct	0	0	0	1
178	2	5	top	NA	19	10	19-Oct	2017	18/12/2017	NA	29	8	8	0	NA	147	26	0	178_2_5_19-Oct	0	0	0	1
178	2	6	bottom	NA	19	10	19-Oct	2017	18/12/2017	NA	29	19	19	0	NA	148	26	0	178_2_6_19-Oct	0	0	0	0.842105263157895
178	2	6	top	NA	19	10	19-Oct	2017	18/12/2017	NA	29	24	24	0	NA	149	26	0	178_2_6_19-Oct	0	0	0	1
178	2	7	bottom	NA	19	10	19-Oct	2017	18/12/2017	NA	29	20	20	0	NA	150	26	0	178_2_7_19-Oct	0	0	0	1
178	2	7	top	NA	19	10	19-Oct	2017	18/12/2017	NA	29	21	21	0	NA	151	26	0	178_2_7_19-Oct	0	0	0	1
178	2	8	bottom	NA	19	10	19-Oct	2017	18/12/2017	NA	29	15	15	0	NA	152	26	0	178_2_8_19-Oct	0	0	0	0.866666666666667
178	2	8	top	NA	19	10	19-Oct	2017	18/12/2017	NA	29	17	17	0	NA	153	26	0	178_2_8_19-Oct	0	0	0	1
178	2	9	bottom	NA	19	10	19-Oct	2017	18/12/2017	NA	29	18	18	0	NA	154	26	0	178_2_9_19-Oct	0	0	0	0.777777777777778
178	2	9	top	NA	19	10	19-Oct	2017	18/12/2017	NA	29	19	19	0	NA	155	26	0	178_2_9_19-Oct	0	0	0	1
178	1	1	bottom	NA	19	10	19-Oct	2017	18/12/2017	NA	29	15	19	4	NA	120	27	0	178_1_1_19-Oct	0	0	0	1
178	1	1	top	NA	19	10	19-Oct	2017	18/12/2017	NA	29	18	18	0	NA	121	27	0	178_1_1_19-Oct	0	0	0	1
178	1	10	bottom	NA	19	10	19-Oct	2017	18/12/2017	NA	29	23	23	0	NA	136	27	0	178_1_10_19-Oct	0	0	0	1
178	1	10	top	NA	19	10	19-Oct	2017	18/12/2017	NA	29	19	19	0	NA	137	27	0	178_1_10_19-Oct	0	0	0	1
178	1	2	bottom	NA	19	10	19-Oct	2017	18/12/2017	NA	29	16	19	3	NA	138	27	0	178_1_2_19-Oct	0	0	0	0.4375
178	1	2	top	NA	19	10	19-Oct	2017	18/12/2017	NA	29	10	12	2	NA	139	27	0	178_1_2_19-Oct	0	0	0	0.4
178	1	3	bottom	NA	19	10	19-Oct	2017	18/12/2017	NA	29	16	16	0	NA	122	27	0	178_1_3_19-Oct	0	0	0	0.8125
178	1	3	top	NA	19	10	19-Oct	2017	18/12/2017	NA	29	8	8	0	NA	123	27	0	178_1_3_19-Oct	0	0	0	1
178	1	4	bottom	NA	19	10	19-Oct	2017	18/12/2017	NA	29	20	20	0	NA	124	27	0	178_1_4_19-Oct	0	0	0	1
178	1	4	top	NA	19	10	19-Oct	2017	18/12/2017	NA	29	7	7	0	NA	125	27	0	178_1_4_19-Oct	0	0	0	1
178	1	5	bottom	NA	19	10	19-Oct	2017	18/12/2017	NA	29	19	19	0	NA	126	27	0	178_1_5_19-Oct	0	0	0	1
178	1	5	top	NA	19	10	19-Oct	2017	18/12/2017	NA	29	14	14	0	NA	127	27	0	178_1_5_19-Oct	0	0	0	1
178	1	6	bottom	NA	19	10	19-Oct	2017	18/12/2017	NA	29	19	19	0	NA	128	27	0	178_1_6_19-Oct	0	0	0	0.894736842105263
178	1	6	top	NA	19	10	19-Oct	2017	18/12/2017	NA	29	10	10	0	NA	129	27	0	178_1_6_19-Oct	0	0	0	0.8
178	1	7	bottom	NA	19	10	19-Oct	2017	18/12/2017	NA	29	19	19	0	NA	130	27	0	178_1_7_19-Oct	0	0	0	0.947368421052632
178	1	7	top	NA	19	10	19-Oct	2017	18/12/2017	NA	29	15	15	0	NA	131	27	0	178_1_7_19-Oct	0	0	0	1
178	1	8	bottom	NA	19	10	19-Oct	2017	18/12/2017	NA	29	21	21	0	NA	132	27	0	178_1_8_19-Oct	0	0	0	1
178	1	8	top	NA	19	10	19-Oct	2017	18/12/2017	NA	29	22	22	0	NA	133	27	0	178_1_8_19-Oct	0	0	0	0.954545454545455
178	1	9	bottom	NA	19	10	19-Oct	2017	18/12/2017	NA	29	21	23	2	NA	134	27	0	178_1_9_19-Oct	0	0	0	1
178	1	9	top	NA	19	10	19-Oct	2017	18/12/2017	NA	29	13	15	2	NA	135	27	0	178_1_9_19-Oct	0	0	0	1
178	2	1	bottom	NA	19	10	19-Oct	2017	18/12/2017	NA	29	10	10	0	NA	140	27	0	178_2_1_19-Oct	0	0	0	0.1
178	2	1	top	NA	19	10	19-Oct	2017	18/12/2017	NA	29	13	13	0	NA	141	27	0	178_2_1_19-Oct	0	0	0	0.692307692307692
178	2	10	bottom	NA	19	10	19-Oct	2017	18/12/2017	NA	29	16	16	0	NA	156	27	0	178_2_10_19-Oct	0	0	0	0.5
178	2	10	top	NA	19	10	19-Oct	2017	18/12/2017	NA	29	22	22	0	NA	157	27	0	178_2_10_19-Oct	0	0	0	1
178	2	2	bottom	NA	19	10	19-Oct	2017	18/12/2017	NA	29	19	19	0	NA	158	27	0	178_2_2_19-Oct	0	0	0	0.894736842105263
178	2	2	top	NA	19	10	19-Oct	2017	18/12/2017	NA	29	20	20	0	NA	159	27	0	178_2_2_19-Oct	0	0	0	1
178	2	3	bottom	NA	19	10	19-Oct	2017	18/12/2017	NA	29	16	16	0	NA	142	27	0	178_2_3_19-Oct	0	0	0	0.1875
178	2	3	top	NA	19	10	19-Oct	2017	18/12/2017	NA	29	16	16	0	NA	143	27	0	178_2_3_19-Oct	0	0	0	0.5
178	2	4	bottom	NA	19	10	19-Oct	2017	18/12/2017	NA	29	26	26	0	NA	144	27	0	178_2_4_19-Oct	0	0	0	0.692307692307692
178	2	4	top	NA	19	10	19-Oct	2017	18/12/2017	NA	29	16	16	0	NA	145	27	0	178_2_4_19-Oct	0	0	0	0.9375
178	2	5	bottom	NA	19	10	19-Oct	2017	18/12/2017	NA	29	20	20	0	NA	146	27	0	178_2_5_19-Oct	0	0	0	1
178	2	5	top	NA	19	10	19-Oct	2017	18/12/2017	NA	29	8	8	0	NA	147	27	0	178_2_5_19-Oct	0	0	0	1
178	2	6	bottom	NA	19	10	19-Oct	2017	18/12/2017	NA	29	19	19	0	NA	148	27	0	178_2_6_19-Oct	0	0	0	0.842105263157895
178	2	6	top	NA	19	10	19-Oct	2017	18/12/2017	NA	29	24	24	0	NA	149	27	0	178_2_6_19-Oct	0	0	0	1
178	2	7	bottom	NA	19	10	19-Oct	2017	18/12/2017	NA	29	20	20	0	NA	150	27	0	178_2_7_19-Oct	0	0	0	1
178	2	7	top	NA	19	10	19-Oct	2017	18/12/2017	NA	29	21	21	0	NA	151	27	0	178_2_7_19-Oct	0	0	0	1
178	2	8	bottom	NA	19	10	19-Oct	2017	18/12/2017	NA	29	15	15	0	NA	152	27	0	178_2_8_19-Oct	0	0	0	0.866666666666667
178	2	8	top	NA	19	10	19-Oct	2017	18/12/2017	NA	29	17	17	0	NA	153	27	0	178_2_8_19-Oct	0	0	0	1
178	2	9	bottom	NA	19	10	19-Oct	2017	18/12/2017	NA	29	18	18	0	NA	154	27	0	178_2_9_19-Oct	0	0	0	0.777777777777778
178	2	9	top	NA	19	10	19-Oct	2017	18/12/2017	NA	29	19	19	0	NA	155	27	0	178_2_9_19-Oct	0	0	0	1
178	1	1	bottom	NA	19	10	19-Oct	2017	18/12/2017	NA	29	15	19	4	NA	120	28	0	178_1_1_19-Oct	0	0	0	1
178	1	1	top	NA	19	10	19-Oct	2017	18/12/2017	NA	29	18	18	0	NA	121	28	0	178_1_1_19-Oct	0	0	0	1
178	1	10	bottom	NA	19	10	19-Oct	2017	18/12/2017	NA	29	23	23	0	NA	136	28	0	178_1_10_19-Oct	0	0	0	1
178	1	10	top	NA	19	10	19-Oct	2017	18/12/2017	NA	29	19	19	0	NA	137	28	0	178_1_10_19-Oct	0	0	0	1
178	1	2	bottom	NA	19	10	19-Oct	2017	18/12/2017	NA	29	16	19	3	NA	138	28	0	178_1_2_19-Oct	0	0	0	0.4375
178	1	2	top	NA	19	10	19-Oct	2017	18/12/2017	NA	29	10	12	2	NA	139	28	0	178_1_2_19-Oct	0	0	0	0.4
178	1	3	bottom	NA	19	10	19-Oct	2017	18/12/2017	NA	29	16	16	0	NA	122	28	1	178_1_3_19-Oct	6.25	6.25	0.0625	0.875
178	1	3	top	NA	19	10	19-Oct	2017	18/12/2017	NA	29	8	8	0	NA	123	28	0	178_1_3_19-Oct	0	0	0	1
178	1	4	bottom	NA	19	10	19-Oct	2017	18/12/2017	NA	29	20	20	0	NA	124	28	0	178_1_4_19-Oct	0	0	0	1
178	1	4	top	NA	19	10	19-Oct	2017	18/12/2017	NA	29	7	7	0	NA	125	28	0	178_1_4_19-Oct	0	0	0	1
178	1	5	bottom	NA	19	10	19-Oct	2017	18/12/2017	NA	29	19	19	0	NA	126	28	0	178_1_5_19-Oct	0	0	0	1
178	1	5	top	NA	19	10	19-Oct	2017	18/12/2017	NA	29	14	14	0	NA	127	28	0	178_1_5_19-Oct	0	0	0	1
178	1	6	bottom	NA	19	10	19-Oct	2017	18/12/2017	NA	29	19	19	0	NA	128	28	0	178_1_6_19-Oct	0	0	0	0.894736842105263
178	1	6	top	NA	19	10	19-Oct	2017	18/12/2017	NA	29	10	10	0	NA	129	28	0	178_1_6_19-Oct	0	0	0	0.8
178	1	7	bottom	NA	19	10	19-Oct	2017	18/12/2017	NA	29	19	19	0	NA	130	28	0	178_1_7_19-Oct	0	0	0	0.947368421052632
178	1	7	top	NA	19	10	19-Oct	2017	18/12/2017	NA	29	15	15	0	NA	131	28	0	178_1_7_19-Oct	0	0	0	1
178	1	8	bottom	NA	19	10	19-Oct	2017	18/12/2017	NA	29	21	21	0	NA	132	28	0	178_1_8_19-Oct	0	0	0	1
178	1	8	top	NA	19	10	19-Oct	2017	18/12/2017	NA	29	22	22	0	NA	133	28	0	178_1_8_19-Oct	0	0	0	0.954545454545455
178	1	9	bottom	NA	19	10	19-Oct	2017	18/12/2017	NA	29	21	23	2	NA	134	28	0	178_1_9_19-Oct	0	0	0	1
178	1	9	top	NA	19	10	19-Oct	2017	18/12/2017	NA	29	13	15	2	NA	135	28	0	178_1_9_19-Oct	0	0	0	1
178	2	1	bottom	NA	19	10	19-Oct	2017	18/12/2017	NA	29	10	10	0	NA	140	28	0	178_2_1_19-Oct	0	0	0	0.1
178	2	1	top	NA	19	10	19-Oct	2017	18/12/2017	NA	29	13	13	0	NA	141	28	0	178_2_1_19-Oct	0	0	0	0.692307692307692
178	2	10	bottom	NA	19	10	19-Oct	2017	18/12/2017	NA	29	16	16	0	NA	156	28	2	178_2_10_19-Oct	12.5	12.5	0.125	0.625
178	2	10	top	NA	19	10	19-Oct	2017	18/12/2017	NA	29	22	22	0	NA	157	28	0	178_2_10_19-Oct	0	0	0	1
178	2	2	bottom	NA	19	10	19-Oct	2017	18/12/2017	NA	29	19	19	0	NA	158	28	0	178_2_2_19-Oct	0	0	0	0.894736842105263
178	2	2	top	NA	19	10	19-Oct	2017	18/12/2017	NA	29	20	20	0	NA	159	28	0	178_2_2_19-Oct	0	0	0	1
178	2	3	bottom	NA	19	10	19-Oct	2017	18/12/2017	NA	29	16	16	0	NA	142	28	0	178_2_3_19-Oct	0	0	0	0.1875
178	2	3	top	NA	19	10	19-Oct	2017	18/12/2017	NA	29	16	16	0	NA	143	28	1	178_2_3_19-Oct	6.25	6.25	0.0625	0.5625
178	2	4	bottom	NA	19	10	19-Oct	2017	18/12/2017	NA	29	26	26	0	NA	144	28	0	178_2_4_19-Oct	0	0	0	0.692307692307692
178	2	4	top	NA	19	10	19-Oct	2017	18/12/2017	NA	29	16	16	0	NA	145	28	0	178_2_4_19-Oct	0	0	0	0.9375
178	2	5	bottom	NA	19	10	19-Oct	2017	18/12/2017	NA	29	20	20	0	NA	146	28	0	178_2_5_19-Oct	0	0	0	1
178	2	5	top	NA	19	10	19-Oct	2017	18/12/2017	NA	29	8	8	0	NA	147	28	0	178_2_5_19-Oct	0	0	0	1
178	2	6	bottom	NA	19	10	19-Oct	2017	18/12/2017	NA	29	19	19	0	NA	148	28	1	178_2_6_19-Oct	5.26315789473684	5.26315789473684	0.0526315789473684	0.894736842105263
178	2	6	top	NA	19	10	19-Oct	2017	18/12/2017	NA	29	24	24	0	NA	149	28	0	178_2_6_19-Oct	0	0	0	1
178	2	7	bottom	NA	19	10	19-Oct	2017	18/12/2017	NA	29	20	20	0	NA	150	28	0	178_2_7_19-Oct	0	0	0	1
178	2	7	top	NA	19	10	19-Oct	2017	18/12/2017	NA	29	21	21	0	NA	151	28	0	178_2_7_19-Oct	0	0	0	1
178	2	8	bottom	NA	19	10	19-Oct	2017	18/12/2017	NA	29	15	15	0	NA	152	28	0	178_2_8_19-Oct	0	0	0	0.866666666666667
178	2	8	top	NA	19	10	19-Oct	2017	18/12/2017	NA	29	17	17	0	NA	153	28	0	178_2_8_19-Oct	0	0	0	1
178	2	9	bottom	NA	19	10	19-Oct	2017	18/12/2017	NA	29	18	18	0	NA	154	28	1	178_2_9_19-Oct	5.55555555555556	5.55555555555556	0.0555555555555556	0.833333333333333
178	2	9	top	NA	19	10	19-Oct	2017	18/12/2017	NA	29	19	19	0	NA	155	28	0	178_2_9_19-Oct	0	0	0	1
178	1	1	bottom	NA	19	10	19-Oct	2017	18/12/2017	NA	29	15	19	4	NA	120	29	0	178_1_1_19-Oct	0	0	0	1
178	1	1	top	NA	19	10	19-Oct	2017	18/12/2017	NA	29	18	18	0	NA	121	29	0	178_1_1_19-Oct	0	0	0	1
178	1	10	bottom	NA	19	10	19-Oct	2017	18/12/2017	NA	29	23	23	0	NA	136	29	0	178_1_10_19-Oct	0	0	0	1
178	1	10	top	NA	19	10	19-Oct	2017	18/12/2017	NA	29	19	19	0	NA	137	29	0	178_1_10_19-Oct	0	0	0	1
178	1	2	bottom	NA	19	10	19-Oct	2017	18/12/2017	NA	29	16	19	3	NA	138	29	0	178_1_2_19-Oct	0	0	0	0.4375
178	1	2	top	NA	19	10	19-Oct	2017	18/12/2017	NA	29	10	12	2	NA	139	29	0	178_1_2_19-Oct	0	0	0	0.4
178	1	3	bottom	NA	19	10	19-Oct	2017	18/12/2017	NA	29	16	16	0	NA	122	29	0	178_1_3_19-Oct	0	0	0	0.875
178	1	3	top	NA	19	10	19-Oct	2017	18/12/2017	NA	29	8	8	0	NA	123	29	0	178_1_3_19-Oct	0	0	0	1
178	1	4	bottom	NA	19	10	19-Oct	2017	18/12/2017	NA	29	20	20	0	NA	124	29	0	178_1_4_19-Oct	0	0	0	1
178	1	4	top	NA	19	10	19-Oct	2017	18/12/2017	NA	29	7	7	0	NA	125	29	0	178_1_4_19-Oct	0	0	0	1
178	1	5	bottom	NA	19	10	19-Oct	2017	18/12/2017	NA	29	19	19	0	NA	126	29	0	178_1_5_19-Oct	0	0	0	1
178	1	5	top	NA	19	10	19-Oct	2017	18/12/2017	NA	29	14	14	0	NA	127	29	0	178_1_5_19-Oct	0	0	0	1
178	1	6	bottom	NA	19	10	19-Oct	2017	18/12/2017	NA	29	19	19	0	NA	128	29	0	178_1_6_19-Oct	0	0	0	0.894736842105263
178	1	6	top	NA	19	10	19-Oct	2017	18/12/2017	NA	29	10	10	0	NA	129	29	0	178_1_6_19-Oct	0	0	0	0.8
178	1	7	bottom	NA	19	10	19-Oct	2017	18/12/2017	NA	29	19	19	0	NA	130	29	0	178_1_7_19-Oct	0	0	0	0.947368421052632
178	1	7	top	NA	19	10	19-Oct	2017	18/12/2017	NA	29	15	15	0	NA	131	29	0	178_1_7_19-Oct	0	0	0	1
178	1	8	bottom	NA	19	10	19-Oct	2017	18/12/2017	NA	29	21	21	0	NA	132	29	0	178_1_8_19-Oct	0	0	0	1
178	1	8	top	NA	19	10	19-Oct	2017	18/12/2017	NA	29	22	22	0	NA	133	29	0	178_1_8_19-Oct	0	0	0	0.954545454545455
178	1	9	bottom	NA	19	10	19-Oct	2017	18/12/2017	NA	29	21	23	2	NA	134	29	0	178_1_9_19-Oct	0	0	0	1
178	1	9	top	NA	19	10	19-Oct	2017	18/12/2017	NA	29	13	15	2	NA	135	29	0	178_1_9_19-Oct	0	0	0	1
178	2	1	bottom	NA	19	10	19-Oct	2017	18/12/2017	NA	29	10	10	0	NA	140	29	0	178_2_1_19-Oct	0	0	0	0.1
178	2	1	top	NA	19	10	19-Oct	2017	18/12/2017	NA	29	13	13	0	NA	141	29	0	178_2_1_19-Oct	0	0	0	0.692307692307692
178	2	10	bottom	NA	19	10	19-Oct	2017	18/12/2017	NA	29	16	16	0	NA	156	29	1	178_2_10_19-Oct	6.25	6.25	0.0625	0.6875
178	2	10	top	NA	19	10	19-Oct	2017	18/12/2017	NA	29	22	22	0	NA	157	29	0	178_2_10_19-Oct	0	0	0	1
178	2	2	bottom	NA	19	10	19-Oct	2017	18/12/2017	NA	29	19	19	0	NA	158	29	0	178_2_2_19-Oct	0	0	0	0.894736842105263
178	2	2	top	NA	19	10	19-Oct	2017	18/12/2017	NA	29	20	20	0	NA	159	29	0	178_2_2_19-Oct	0	0	0	1
178	2	3	bottom	NA	19	10	19-Oct	2017	18/12/2017	NA	29	16	16	0	NA	142	29	0	178_2_3_19-Oct	0	0	0	0.1875
178	2	3	top	NA	19	10	19-Oct	2017	18/12/2017	NA	29	16	16	0	NA	143	29	0	178_2_3_19-Oct	0	0	0	0.5625
178	2	4	bottom	NA	19	10	19-Oct	2017	18/12/2017	NA	29	26	26	0	NA	144	29	0	178_2_4_19-Oct	0	0	0	0.692307692307692
178	2	4	top	NA	19	10	19-Oct	2017	18/12/2017	NA	29	16	16	0	NA	145	29	0	178_2_4_19-Oct	0	0	0	0.9375
178	2	5	bottom	NA	19	10	19-Oct	2017	18/12/2017	NA	29	20	20	0	NA	146	29	0	178_2_5_19-Oct	0	0	0	1
178	2	5	top	NA	19	10	19-Oct	2017	18/12/2017	NA	29	8	8	0	NA	147	29	0	178_2_5_19-Oct	0	0	0	1
178	2	6	bottom	NA	19	10	19-Oct	2017	18/12/2017	NA	29	19	19	0	NA	148	29	1	178_2_6_19-Oct	5.26315789473684	5.26315789473684	0.0526315789473684	0.947368421052632
178	2	6	top	NA	19	10	19-Oct	2017	18/12/2017	NA	29	24	24	0	NA	149	29	0	178_2_6_19-Oct	0	0	0	1
178	2	7	bottom	NA	19	10	19-Oct	2017	18/12/2017	NA	29	20	20	0	NA	150	29	0	178_2_7_19-Oct	0	0	0	1
178	2	7	top	NA	19	10	19-Oct	2017	18/12/2017	NA	29	21	21	0	NA	151	29	0	178_2_7_19-Oct	0	0	0	1
178	2	8	bottom	NA	19	10	19-Oct	2017	18/12/2017	NA	29	15	15	0	NA	152	29	0	178_2_8_19-Oct	0	0	0	0.866666666666667
178	2	8	top	NA	19	10	19-Oct	2017	18/12/2017	NA	29	17	17	0	NA	153	29	0	178_2_8_19-Oct	0	0	0	1
178	2	9	bottom	NA	19	10	19-Oct	2017	18/12/2017	NA	29	18	18	0	NA	154	29	0	178_2_9_19-Oct	0	0	0	0.833333333333333
178	2	9	top	NA	19	10	19-Oct	2017	18/12/2017	NA	29	19	19	0	NA	155	29	0	178_2_9_19-Oct	0	0	0	1
178	1	1	bottom	NA	19	10	19-Oct	2017	18/12/2017	NA	29	15	19	4	NA	120	30	0	178_1_1_19-Oct	0	0	0	1
178	1	1	top	NA	19	10	19-Oct	2017	18/12/2017	NA	29	18	18	0	NA	121	30	0	178_1_1_19-Oct	0	0	0	1
178	1	10	bottom	NA	19	10	19-Oct	2017	18/12/2017	NA	29	23	23	0	NA	136	30	0	178_1_10_19-Oct	0	0	0	1
178	1	10	top	NA	19	10	19-Oct	2017	18/12/2017	NA	29	19	19	0	NA	137	30	0	178_1_10_19-Oct	0	0	0	1
178	1	2	bottom	NA	19	10	19-Oct	2017	18/12/2017	NA	29	16	19	3	NA	138	30	0	178_1_2_19-Oct	0	0	0	0.4375
178	1	2	top	NA	19	10	19-Oct	2017	18/12/2017	NA	29	10	12	2	NA	139	30	0	178_1_2_19-Oct	0	0	0	0.4
178	1	3	bottom	NA	19	10	19-Oct	2017	18/12/2017	NA	29	16	16	0	NA	122	30	0	178_1_3_19-Oct	0	0	0	0.875
178	1	3	top	NA	19	10	19-Oct	2017	18/12/2017	NA	29	8	8	0	NA	123	30	0	178_1_3_19-Oct	0	0	0	1
178	1	4	bottom	NA	19	10	19-Oct	2017	18/12/2017	NA	29	20	20	0	NA	124	30	0	178_1_4_19-Oct	0	0	0	1
178	1	4	top	NA	19	10	19-Oct	2017	18/12/2017	NA	29	7	7	0	NA	125	30	0	178_1_4_19-Oct	0	0	0	1
178	1	5	bottom	NA	19	10	19-Oct	2017	18/12/2017	NA	29	19	19	0	NA	126	30	0	178_1_5_19-Oct	0	0	0	1
178	1	5	top	NA	19	10	19-Oct	2017	18/12/2017	NA	29	14	14	0	NA	127	30	0	178_1_5_19-Oct	0	0	0	1
178	1	6	bottom	NA	19	10	19-Oct	2017	18/12/2017	NA	29	19	19	0	NA	128	30	0	178_1_6_19-Oct	0	0	0	0.894736842105263
178	1	6	top	NA	19	10	19-Oct	2017	18/12/2017	NA	29	10	10	0	NA	129	30	0	178_1_6_19-Oct	0	0	0	0.8
178	1	7	bottom	NA	19	10	19-Oct	2017	18/12/2017	NA	29	19	19	0	NA	130	30	0	178_1_7_19-Oct	0	0	0	0.947368421052632
178	1	7	top	NA	19	10	19-Oct	2017	18/12/2017	NA	29	15	15	0	NA	131	30	0	178_1_7_19-Oct	0	0	0	1
178	1	8	bottom	NA	19	10	19-Oct	2017	18/12/2017	NA	29	21	21	0	NA	132	30	0	178_1_8_19-Oct	0	0	0	1
178	1	8	top	NA	19	10	19-Oct	2017	18/12/2017	NA	29	22	22	0	NA	133	30	0	178_1_8_19-Oct	0	0	0	0.954545454545455
178	1	9	bottom	NA	19	10	19-Oct	2017	18/12/2017	NA	29	21	23	2	NA	134	30	0	178_1_9_19-Oct	0	0	0	1
178	1	9	top	NA	19	10	19-Oct	2017	18/12/2017	NA	29	13	15	2	NA	135	30	0	178_1_9_19-Oct	0	0	0	1
178	2	1	bottom	NA	19	10	19-Oct	2017	18/12/2017	NA	29	10	10	0	NA	140	30	2	178_2_1_19-Oct	20	20	0.2	0.3
178	2	1	top	NA	19	10	19-Oct	2017	18/12/2017	NA	29	13	13	0	NA	141	30	0	178_2_1_19-Oct	0	0	0	0.692307692307692
178	2	10	bottom	NA	19	10	19-Oct	2017	18/12/2017	NA	29	16	16	0	NA	156	30	0	178_2_10_19-Oct	0	0	0	0.6875
178	2	10	top	NA	19	10	19-Oct	2017	18/12/2017	NA	29	22	22	0	NA	157	30	0	178_2_10_19-Oct	0	0	0	1
178	2	2	bottom	NA	19	10	19-Oct	2017	18/12/2017	NA	29	19	19	0	NA	158	30	0	178_2_2_19-Oct	0	0	0	0.894736842105263
178	2	2	top	NA	19	10	19-Oct	2017	18/12/2017	NA	29	20	20	0	NA	159	30	0	178_2_2_19-Oct	0	0	0	1
178	2	3	bottom	NA	19	10	19-Oct	2017	18/12/2017	NA	29	16	16	0	NA	142	30	0	178_2_3_19-Oct	0	0	0	0.1875
178	2	3	top	NA	19	10	19-Oct	2017	18/12/2017	NA	29	16	16	0	NA	143	30	0	178_2_3_19-Oct	0	0	0	0.5625
178	2	4	bottom	NA	19	10	19-Oct	2017	18/12/2017	NA	29	26	26	0	NA	144	30	0	178_2_4_19-Oct	0	0	0	0.692307692307692
178	2	4	top	NA	19	10	19-Oct	2017	18/12/2017	NA	29	16	16	0	NA	145	30	0	178_2_4_19-Oct	0	0	0	0.9375
178	2	5	bottom	NA	19	10	19-Oct	2017	18/12/2017	NA	29	20	20	0	NA	146	30	0	178_2_5_19-Oct	0	0	0	1
178	2	5	top	NA	19	10	19-Oct	2017	18/12/2017	NA	29	8	8	0	NA	147	30	0	178_2_5_19-Oct	0	0	0	1
178	2	6	bottom	NA	19	10	19-Oct	2017	18/12/2017	NA	29	19	19	0	NA	148	30	0	178_2_6_19-Oct	0	0	0	0.947368421052632
178	2	6	top	NA	19	10	19-Oct	2017	18/12/2017	NA	29	24	24	0	NA	149	30	0	178_2_6_19-Oct	0	0	0	1
178	2	7	bottom	NA	19	10	19-Oct	2017	18/12/2017	NA	29	20	20	0	NA	150	30	0	178_2_7_19-Oct	0	0	0	1
178	2	7	top	NA	19	10	19-Oct	2017	18/12/2017	NA	29	21	21	0	NA	151	30	0	178_2_7_19-Oct	0	0	0	1
178	2	8	bottom	NA	19	10	19-Oct	2017	18/12/2017	NA	29	15	15	0	NA	152	30	0	178_2_8_19-Oct	0	0	0	0.866666666666667
178	2	8	top	NA	19	10	19-Oct	2017	18/12/2017	NA	29	17	17	0	NA	153	30	0	178_2_8_19-Oct	0	0	0	1
178	2	9	bottom	NA	19	10	19-Oct	2017	18/12/2017	NA	29	18	18	0	NA	154	30	0	178_2_9_19-Oct	0	0	0	0.833333333333333
178	2	9	top	NA	19	10	19-Oct	2017	18/12/2017	NA	29	19	19	0	NA	155	30	0	178_2_9_19-Oct	0	0	0	1
178	1	1	bottom	NA	19	10	19-Oct	2017	18/12/2017	NA	29	15	19	4	NA	120	31	0	178_1_1_19-Oct	0	0	0	1
178	1	1	top	NA	19	10	19-Oct	2017	18/12/2017	NA	29	18	18	0	NA	121	31	0	178_1_1_19-Oct	0	0	0	1
178	1	10	bottom	NA	19	10	19-Oct	2017	18/12/2017	NA	29	23	23	0	NA	136	31	0	178_1_10_19-Oct	0	0	0	1
178	1	10	top	NA	19	10	19-Oct	2017	18/12/2017	NA	29	19	19	0	NA	137	31	0	178_1_10_19-Oct	0	0	0	1
178	1	2	bottom	NA	19	10	19-Oct	2017	18/12/2017	NA	29	16	19	3	NA	138	31	0	178_1_2_19-Oct	0	0	0	0.4375
178	1	2	top	NA	19	10	19-Oct	2017	18/12/2017	NA	29	10	12	2	NA	139	31	0	178_1_2_19-Oct	0	0	0	0.4
178	1	3	bottom	NA	19	10	19-Oct	2017	18/12/2017	NA	29	16	16	0	NA	122	31	1	178_1_3_19-Oct	6.25	6.25	0.0625	0.9375
178	1	3	top	NA	19	10	19-Oct	2017	18/12/2017	NA	29	8	8	0	NA	123	31	0	178_1_3_19-Oct	0	0	0	1
178	1	4	bottom	NA	19	10	19-Oct	2017	18/12/2017	NA	29	20	20	0	NA	124	31	0	178_1_4_19-Oct	0	0	0	1
178	1	4	top	NA	19	10	19-Oct	2017	18/12/2017	NA	29	7	7	0	NA	125	31	0	178_1_4_19-Oct	0	0	0	1
178	1	5	bottom	NA	19	10	19-Oct	2017	18/12/2017	NA	29	19	19	0	NA	126	31	0	178_1_5_19-Oct	0	0	0	1
178	1	5	top	NA	19	10	19-Oct	2017	18/12/2017	NA	29	14	14	0	NA	127	31	0	178_1_5_19-Oct	0	0	0	1
178	1	6	bottom	NA	19	10	19-Oct	2017	18/12/2017	NA	29	19	19	0	NA	128	31	0	178_1_6_19-Oct	0	0	0	0.894736842105263
178	1	6	top	NA	19	10	19-Oct	2017	18/12/2017	NA	29	10	10	0	NA	129	31	0	178_1_6_19-Oct	0	0	0	0.8
178	1	7	bottom	NA	19	10	19-Oct	2017	18/12/2017	NA	29	19	19	0	NA	130	31	0	178_1_7_19-Oct	0	0	0	0.947368421052632
178	1	7	top	NA	19	10	19-Oct	2017	18/12/2017	NA	29	15	15	0	NA	131	31	0	178_1_7_19-Oct	0	0	0	1
178	1	8	bottom	NA	19	10	19-Oct	2017	18/12/2017	NA	29	21	21	0	NA	132	31	0	178_1_8_19-Oct	0	0	0	1
178	1	8	top	NA	19	10	19-Oct	2017	18/12/2017	NA	29	22	22	0	NA	133	31	0	178_1_8_19-Oct	0	0	0	0.954545454545455
178	1	9	bottom	NA	19	10	19-Oct	2017	18/12/2017	NA	29	21	23	2	NA	134	31	0	178_1_9_19-Oct	0	0	0	1
178	1	9	top	NA	19	10	19-Oct	2017	18/12/2017	NA	29	13	15	2	NA	135	31	0	178_1_9_19-Oct	0	0	0	1
178	2	1	bottom	NA	19	10	19-Oct	2017	18/12/2017	NA	29	10	10	0	NA	140	31	0	178_2_1_19-Oct	0	0	0	0.3
178	2	1	top	NA	19	10	19-Oct	2017	18/12/2017	NA	29	13	13	0	NA	141	31	0	178_2_1_19-Oct	0	0	0	0.692307692307692
178	2	10	bottom	NA	19	10	19-Oct	2017	18/12/2017	NA	29	16	16	0	NA	156	31	2	178_2_10_19-Oct	12.5	12.5	0.125	0.8125
178	2	10	top	NA	19	10	19-Oct	2017	18/12/2017	NA	29	22	22	0	NA	157	31	0	178_2_10_19-Oct	0	0	0	1
178	2	2	bottom	NA	19	10	19-Oct	2017	18/12/2017	NA	29	19	19	0	NA	158	31	1	178_2_2_19-Oct	5.26315789473684	5.26315789473684	0.0526315789473684	0.947368421052632
178	2	2	top	NA	19	10	19-Oct	2017	18/12/2017	NA	29	20	20	0	NA	159	31	0	178_2_2_19-Oct	0	0	0	1
178	2	3	bottom	NA	19	10	19-Oct	2017	18/12/2017	NA	29	16	16	0	NA	142	31	0	178_2_3_19-Oct	0	0	0	0.1875
178	2	3	top	NA	19	10	19-Oct	2017	18/12/2017	NA	29	16	16	0	NA	143	31	0	178_2_3_19-Oct	0	0	0	0.5625
178	2	4	bottom	NA	19	10	19-Oct	2017	18/12/2017	NA	29	26	26	0	NA	144	31	1	178_2_4_19-Oct	3.84615384615385	3.84615384615385	0.0384615384615385	0.730769230769231
178	2	4	top	NA	19	10	19-Oct	2017	18/12/2017	NA	29	16	16	0	NA	145	31	0	178_2_4_19-Oct	0	0	0	0.9375
178	2	5	bottom	NA	19	10	19-Oct	2017	18/12/2017	NA	29	20	20	0	NA	146	31	0	178_2_5_19-Oct	0	0	0	1
178	2	5	top	NA	19	10	19-Oct	2017	18/12/2017	NA	29	8	8	0	NA	147	31	0	178_2_5_19-Oct	0	0	0	1
178	2	6	bottom	NA	19	10	19-Oct	2017	18/12/2017	NA	29	19	19	0	NA	148	31	0	178_2_6_19-Oct	0	0	0	0.947368421052632
178	2	6	top	NA	19	10	19-Oct	2017	18/12/2017	NA	29	24	24	0	NA	149	31	0	178_2_6_19-Oct	0	0	0	1
178	2	7	bottom	NA	19	10	19-Oct	2017	18/12/2017	NA	29	20	20	0	NA	150	31	0	178_2_7_19-Oct	0	0	0	1
178	2	7	top	NA	19	10	19-Oct	2017	18/12/2017	NA	29	21	21	0	NA	151	31	0	178_2_7_19-Oct	0	0	0	1
178	2	8	bottom	NA	19	10	19-Oct	2017	18/12/2017	NA	29	15	15	0	NA	152	31	0	178_2_8_19-Oct	0	0	0	0.866666666666667
178	2	8	top	NA	19	10	19-Oct	2017	18/12/2017	NA	29	17	17	0	NA	153	31	0	178_2_8_19-Oct	0	0	0	1
178	2	9	bottom	NA	19	10	19-Oct	2017	18/12/2017	NA	29	18	18	0	NA	154	31	1	178_2_9_19-Oct	5.55555555555556	5.55555555555556	0.0555555555555556	0.888888888888889
178	2	9	top	NA	19	10	19-Oct	2017	18/12/2017	NA	29	19	19	0	NA	155	31	0	178_2_9_19-Oct	0	0	0	1
178	1	1	bottom	NA	19	10	19-Oct	2017	18/12/2017	NA	29	15	19	4	NA	120	32	0	178_1_1_19-Oct	0	0	0	1
178	1	1	top	NA	19	10	19-Oct	2017	18/12/2017	NA	29	18	18	0	NA	121	32	0	178_1_1_19-Oct	0	0	0	1
178	1	10	bottom	NA	19	10	19-Oct	2017	18/12/2017	NA	29	23	23	0	NA	136	32	0	178_1_10_19-Oct	0	0	0	1
178	1	10	top	NA	19	10	19-Oct	2017	18/12/2017	NA	29	19	19	0	NA	137	32	0	178_1_10_19-Oct	0	0	0	1
178	1	2	bottom	NA	19	10	19-Oct	2017	18/12/2017	NA	29	16	19	3	NA	138	32	0	178_1_2_19-Oct	0	0	0	0.4375
178	1	2	top	NA	19	10	19-Oct	2017	18/12/2017	NA	29	10	12	2	NA	139	32	0	178_1_2_19-Oct	0	0	0	0.4
178	1	3	bottom	NA	19	10	19-Oct	2017	18/12/2017	NA	29	16	16	0	NA	122	32	0	178_1_3_19-Oct	0	0	0	0.9375
178	1	3	top	NA	19	10	19-Oct	2017	18/12/2017	NA	29	8	8	0	NA	123	32	0	178_1_3_19-Oct	0	0	0	1
178	1	4	bottom	NA	19	10	19-Oct	2017	18/12/2017	NA	29	20	20	0	NA	124	32	0	178_1_4_19-Oct	0	0	0	1
178	1	4	top	NA	19	10	19-Oct	2017	18/12/2017	NA	29	7	7	0	NA	125	32	0	178_1_4_19-Oct	0	0	0	1
178	1	5	bottom	NA	19	10	19-Oct	2017	18/12/2017	NA	29	19	19	0	NA	126	32	0	178_1_5_19-Oct	0	0	0	1
178	1	5	top	NA	19	10	19-Oct	2017	18/12/2017	NA	29	14	14	0	NA	127	32	0	178_1_5_19-Oct	0	0	0	1
178	1	6	bottom	NA	19	10	19-Oct	2017	18/12/2017	NA	29	19	19	0	NA	128	32	0	178_1_6_19-Oct	0	0	0	0.894736842105263
178	1	6	top	NA	19	10	19-Oct	2017	18/12/2017	NA	29	10	10	0	NA	129	32	0	178_1_6_19-Oct	0	0	0	0.8
178	1	7	bottom	NA	19	10	19-Oct	2017	18/12/2017	NA	29	19	19	0	NA	130	32	0	178_1_7_19-Oct	0	0	0	0.947368421052632
178	1	7	top	NA	19	10	19-Oct	2017	18/12/2017	NA	29	15	15	0	NA	131	32	0	178_1_7_19-Oct	0	0	0	1
178	1	8	bottom	NA	19	10	19-Oct	2017	18/12/2017	NA	29	21	21	0	NA	132	32	0	178_1_8_19-Oct	0	0	0	1
178	1	8	top	NA	19	10	19-Oct	2017	18/12/2017	NA	29	22	22	0	NA	133	32	0	178_1_8_19-Oct	0	0	0	0.954545454545455
178	1	9	bottom	NA	19	10	19-Oct	2017	18/12/2017	NA	29	21	23	2	NA	134	32	0	178_1_9_19-Oct	0	0	0	1
178	1	9	top	NA	19	10	19-Oct	2017	18/12/2017	NA	29	13	15	2	NA	135	32	0	178_1_9_19-Oct	0	0	0	1
178	2	1	bottom	NA	19	10	19-Oct	2017	18/12/2017	NA	29	10	10	0	NA	140	32	2	178_2_1_19-Oct	20	20	0.2	0.5
178	2	1	top	NA	19	10	19-Oct	2017	18/12/2017	NA	29	13	13	0	NA	141	32	1	178_2_1_19-Oct	7.69230769230769	7.69230769230769	0.0769230769230769	0.769230769230769
178	2	10	bottom	NA	19	10	19-Oct	2017	18/12/2017	NA	29	16	16	0	NA	156	32	1	178_2_10_19-Oct	6.25	6.25	0.0625	0.875
178	2	10	top	NA	19	10	19-Oct	2017	18/12/2017	NA	29	22	22	0	NA	157	32	0	178_2_10_19-Oct	0	0	0	1
178	2	2	bottom	NA	19	10	19-Oct	2017	18/12/2017	NA	29	19	19	0	NA	158	32	0	178_2_2_19-Oct	0	0	0	0.947368421052632
178	2	2	top	NA	19	10	19-Oct	2017	18/12/2017	NA	29	20	20	0	NA	159	32	0	178_2_2_19-Oct	0	0	0	1
178	2	3	bottom	NA	19	10	19-Oct	2017	18/12/2017	NA	29	16	16	0	NA	142	32	0	178_2_3_19-Oct	0	0	0	0.1875
178	2	3	top	NA	19	10	19-Oct	2017	18/12/2017	NA	29	16	16	0	NA	143	32	0	178_2_3_19-Oct	0	0	0	0.5625
178	2	4	bottom	NA	19	10	19-Oct	2017	18/12/2017	NA	29	26	26	0	NA	144	32	3	178_2_4_19-Oct	11.5384615384615	11.5384615384615	0.115384615384615	0.846153846153846
178	2	4	top	NA	19	10	19-Oct	2017	18/12/2017	NA	29	16	16	0	NA	145	32	0	178_2_4_19-Oct	0	0	0	0.9375
178	2	5	bottom	NA	19	10	19-Oct	2017	18/12/2017	NA	29	20	20	0	NA	146	32	0	178_2_5_19-Oct	0	0	0	1
178	2	5	top	NA	19	10	19-Oct	2017	18/12/2017	NA	29	8	8	0	NA	147	32	0	178_2_5_19-Oct	0	0	0	1
178	2	6	bottom	NA	19	10	19-Oct	2017	18/12/2017	NA	29	19	19	0	NA	148	32	1	178_2_6_19-Oct	5.26315789473684	5.26315789473684	0.0526315789473684	1
178	2	6	top	NA	19	10	19-Oct	2017	18/12/2017	NA	29	24	24	0	NA	149	32	0	178_2_6_19-Oct	0	0	0	1
178	2	7	bottom	NA	19	10	19-Oct	2017	18/12/2017	NA	29	20	20	0	NA	150	32	0	178_2_7_19-Oct	0	0	0	1
178	2	7	top	NA	19	10	19-Oct	2017	18/12/2017	NA	29	21	21	0	NA	151	32	0	178_2_7_19-Oct	0	0	0	1
178	2	8	bottom	NA	19	10	19-Oct	2017	18/12/2017	NA	29	15	15	0	NA	152	32	1	178_2_8_19-Oct	6.66666666666667	6.66666666666667	0.0666666666666667	0.933333333333333
178	2	8	top	NA	19	10	19-Oct	2017	18/12/2017	NA	29	17	17	0	NA	153	32	0	178_2_8_19-Oct	0	0	0	1
178	2	9	bottom	NA	19	10	19-Oct	2017	18/12/2017	NA	29	18	18	0	NA	154	32	1	178_2_9_19-Oct	5.55555555555556	5.55555555555556	0.0555555555555556	0.944444444444444
178	2	9	top	NA	19	10	19-Oct	2017	18/12/2017	NA	29	19	19	0	NA	155	32	0	178_2_9_19-Oct	0	0	0	1
178	1	1	bottom	NA	19	10	19-Oct	2017	18/12/2017	NA	29	15	19	4	NA	120	33	0	178_1_1_19-Oct	0	0	0	1
178	1	1	top	NA	19	10	19-Oct	2017	18/12/2017	NA	29	18	18	0	NA	121	33	0	178_1_1_19-Oct	0	0	0	1
178	1	10	bottom	NA	19	10	19-Oct	2017	18/12/2017	NA	29	23	23	0	NA	136	33	0	178_1_10_19-Oct	0	0	0	1
178	1	10	top	NA	19	10	19-Oct	2017	18/12/2017	NA	29	19	19	0	NA	137	33	0	178_1_10_19-Oct	0	0	0	1
178	1	2	bottom	NA	19	10	19-Oct	2017	18/12/2017	NA	29	16	19	3	NA	138	33	0	178_1_2_19-Oct	0	0	0	0.4375
178	1	2	top	NA	19	10	19-Oct	2017	18/12/2017	NA	29	10	12	2	NA	139	33	0	178_1_2_19-Oct	0	0	0	0.4
178	1	3	bottom	NA	19	10	19-Oct	2017	18/12/2017	NA	29	16	16	0	NA	122	33	0	178_1_3_19-Oct	0	0	0	0.9375
178	1	3	top	NA	19	10	19-Oct	2017	18/12/2017	NA	29	8	8	0	NA	123	33	0	178_1_3_19-Oct	0	0	0	1
178	1	4	bottom	NA	19	10	19-Oct	2017	18/12/2017	NA	29	20	20	0	NA	124	33	0	178_1_4_19-Oct	0	0	0	1
178	1	4	top	NA	19	10	19-Oct	2017	18/12/2017	NA	29	7	7	0	NA	125	33	0	178_1_4_19-Oct	0	0	0	1
178	1	5	bottom	NA	19	10	19-Oct	2017	18/12/2017	NA	29	19	19	0	NA	126	33	0	178_1_5_19-Oct	0	0	0	1
178	1	5	top	NA	19	10	19-Oct	2017	18/12/2017	NA	29	14	14	0	NA	127	33	0	178_1_5_19-Oct	0	0	0	1
178	1	6	bottom	NA	19	10	19-Oct	2017	18/12/2017	NA	29	19	19	0	NA	128	33	0	178_1_6_19-Oct	0	0	0	0.894736842105263
178	1	6	top	NA	19	10	19-Oct	2017	18/12/2017	NA	29	10	10	0	NA	129	33	0	178_1_6_19-Oct	0	0	0	0.8
178	1	7	bottom	NA	19	10	19-Oct	2017	18/12/2017	NA	29	19	19	0	NA	130	33	0	178_1_7_19-Oct	0	0	0	0.947368421052632
178	1	7	top	NA	19	10	19-Oct	2017	18/12/2017	NA	29	15	15	0	NA	131	33	0	178_1_7_19-Oct	0	0	0	1
178	1	8	bottom	NA	19	10	19-Oct	2017	18/12/2017	NA	29	21	21	0	NA	132	33	0	178_1_8_19-Oct	0	0	0	1
178	1	8	top	NA	19	10	19-Oct	2017	18/12/2017	NA	29	22	22	0	NA	133	33	0	178_1_8_19-Oct	0	0	0	0.954545454545455
178	1	9	bottom	NA	19	10	19-Oct	2017	18/12/2017	NA	29	21	23	2	NA	134	33	0	178_1_9_19-Oct	0	0	0	1
178	1	9	top	NA	19	10	19-Oct	2017	18/12/2017	NA	29	13	15	2	NA	135	33	0	178_1_9_19-Oct	0	0	0	1
178	2	1	bottom	NA	19	10	19-Oct	2017	18/12/2017	NA	29	10	10	0	NA	140	33	0	178_2_1_19-Oct	0	0	0	0.5
178	2	1	top	NA	19	10	19-Oct	2017	18/12/2017	NA	29	13	13	0	NA	141	33	0	178_2_1_19-Oct	0	0	0	0.769230769230769
178	2	10	bottom	NA	19	10	19-Oct	2017	18/12/2017	NA	29	16	16	0	NA	156	33	0	178_2_10_19-Oct	0	0	0	0.875
178	2	10	top	NA	19	10	19-Oct	2017	18/12/2017	NA	29	22	22	0	NA	157	33	0	178_2_10_19-Oct	0	0	0	1
178	2	2	bottom	NA	19	10	19-Oct	2017	18/12/2017	NA	29	19	19	0	NA	158	33	0	178_2_2_19-Oct	0	0	0	0.947368421052632
178	2	2	top	NA	19	10	19-Oct	2017	18/12/2017	NA	29	20	20	0	NA	159	33	0	178_2_2_19-Oct	0	0	0	1
178	2	3	bottom	NA	19	10	19-Oct	2017	18/12/2017	NA	29	16	16	0	NA	142	33	0	178_2_3_19-Oct	0	0	0	0.1875
178	2	3	top	NA	19	10	19-Oct	2017	18/12/2017	NA	29	16	16	0	NA	143	33	0	178_2_3_19-Oct	0	0	0	0.5625
178	2	4	bottom	NA	19	10	19-Oct	2017	18/12/2017	NA	29	26	26	0	NA	144	33	0	178_2_4_19-Oct	0	0	0	0.846153846153846
178	2	4	top	NA	19	10	19-Oct	2017	18/12/2017	NA	29	16	16	0	NA	145	33	0	178_2_4_19-Oct	0	0	0	0.9375
178	2	5	bottom	NA	19	10	19-Oct	2017	18/12/2017	NA	29	20	20	0	NA	146	33	0	178_2_5_19-Oct	0	0	0	1
178	2	5	top	NA	19	10	19-Oct	2017	18/12/2017	NA	29	8	8	0	NA	147	33	0	178_2_5_19-Oct	0	0	0	1
178	2	6	bottom	NA	19	10	19-Oct	2017	18/12/2017	NA	29	19	19	0	NA	148	33	0	178_2_6_19-Oct	0	0	0	1
178	2	6	top	NA	19	10	19-Oct	2017	18/12/2017	NA	29	24	24	0	NA	149	33	0	178_2_6_19-Oct	0	0	0	1
178	2	7	bottom	NA	19	10	19-Oct	2017	18/12/2017	NA	29	20	20	0	NA	150	33	0	178_2_7_19-Oct	0	0	0	1
178	2	7	top	NA	19	10	19-Oct	2017	18/12/2017	NA	29	21	21	0	NA	151	33	0	178_2_7_19-Oct	0	0	0	1
178	2	8	bottom	NA	19	10	19-Oct	2017	18/12/2017	NA	29	15	15	0	NA	152	33	0	178_2_8_19-Oct	0	0	0	0.933333333333333
178	2	8	top	NA	19	10	19-Oct	2017	18/12/2017	NA	29	17	17	0	NA	153	33	0	178_2_8_19-Oct	0	0	0	1
178	2	9	bottom	NA	19	10	19-Oct	2017	18/12/2017	NA	29	18	18	0	NA	154	33	0	178_2_9_19-Oct	0	0	0	0.944444444444444
178	2	9	top	NA	19	10	19-Oct	2017	18/12/2017	NA	29	19	19	0	NA	155	33	0	178_2_9_19-Oct	0	0	0	1
178	1	1	bottom	NA	19	10	19-Oct	2017	18/12/2017	NA	29	15	19	4	NA	120	34	0	178_1_1_19-Oct	0	0	0	1
178	1	1	top	NA	19	10	19-Oct	2017	18/12/2017	NA	29	18	18	0	NA	121	34	0	178_1_1_19-Oct	0	0	0	1
178	1	10	bottom	NA	19	10	19-Oct	2017	18/12/2017	NA	29	23	23	0	NA	136	34	0	178_1_10_19-Oct	0	0	0	1
178	1	10	top	NA	19	10	19-Oct	2017	18/12/2017	NA	29	19	19	0	NA	137	34	0	178_1_10_19-Oct	0	0	0	1
178	1	2	bottom	NA	19	10	19-Oct	2017	18/12/2017	NA	29	16	19	3	NA	138	34	0	178_1_2_19-Oct	0	0	0	0.4375
178	1	2	top	NA	19	10	19-Oct	2017	18/12/2017	NA	29	10	12	2	NA	139	34	0	178_1_2_19-Oct	0	0	0	0.4
178	1	3	bottom	NA	19	10	19-Oct	2017	18/12/2017	NA	29	16	16	0	NA	122	34	0	178_1_3_19-Oct	0	0	0	0.9375
178	1	3	top	NA	19	10	19-Oct	2017	18/12/2017	NA	29	8	8	0	NA	123	34	0	178_1_3_19-Oct	0	0	0	1
178	1	4	bottom	NA	19	10	19-Oct	2017	18/12/2017	NA	29	20	20	0	NA	124	34	0	178_1_4_19-Oct	0	0	0	1
178	1	4	top	NA	19	10	19-Oct	2017	18/12/2017	NA	29	7	7	0	NA	125	34	0	178_1_4_19-Oct	0	0	0	1
178	1	5	bottom	NA	19	10	19-Oct	2017	18/12/2017	NA	29	19	19	0	NA	126	34	0	178_1_5_19-Oct	0	0	0	1
178	1	5	top	NA	19	10	19-Oct	2017	18/12/2017	NA	29	14	14	0	NA	127	34	0	178_1_5_19-Oct	0	0	0	1
178	1	6	bottom	NA	19	10	19-Oct	2017	18/12/2017	NA	29	19	19	0	NA	128	34	0	178_1_6_19-Oct	0	0	0	0.894736842105263
178	1	6	top	NA	19	10	19-Oct	2017	18/12/2017	NA	29	10	10	0	NA	129	34	0	178_1_6_19-Oct	0	0	0	0.8
178	1	7	bottom	NA	19	10	19-Oct	2017	18/12/2017	NA	29	19	19	0	NA	130	34	0	178_1_7_19-Oct	0	0	0	0.947368421052632
178	1	7	top	NA	19	10	19-Oct	2017	18/12/2017	NA	29	15	15	0	NA	131	34	0	178_1_7_19-Oct	0	0	0	1
178	1	8	bottom	NA	19	10	19-Oct	2017	18/12/2017	NA	29	21	21	0	NA	132	34	0	178_1_8_19-Oct	0	0	0	1
178	1	8	top	NA	19	10	19-Oct	2017	18/12/2017	NA	29	22	22	0	NA	133	34	0	178_1_8_19-Oct	0	0	0	0.954545454545455
178	1	9	bottom	NA	19	10	19-Oct	2017	18/12/2017	NA	29	21	23	2	NA	134	34	0	178_1_9_19-Oct	0	0	0	1
178	1	9	top	NA	19	10	19-Oct	2017	18/12/2017	NA	29	13	15	2	NA	135	34	0	178_1_9_19-Oct	0	0	0	1
178	2	1	bottom	NA	19	10	19-Oct	2017	18/12/2017	NA	29	10	10	0	NA	140	34	0	178_2_1_19-Oct	0	0	0	0.5
178	2	1	top	NA	19	10	19-Oct	2017	18/12/2017	NA	29	13	13	0	NA	141	34	0	178_2_1_19-Oct	0	0	0	0.769230769230769
178	2	10	bottom	NA	19	10	19-Oct	2017	18/12/2017	NA	29	16	16	0	NA	156	34	0	178_2_10_19-Oct	0	0	0	0.875
178	2	10	top	NA	19	10	19-Oct	2017	18/12/2017	NA	29	22	22	0	NA	157	34	0	178_2_10_19-Oct	0	0	0	1
178	2	2	bottom	NA	19	10	19-Oct	2017	18/12/2017	NA	29	19	19	0	NA	158	34	0	178_2_2_19-Oct	0	0	0	0.947368421052632
178	2	2	top	NA	19	10	19-Oct	2017	18/12/2017	NA	29	20	20	0	NA	159	34	0	178_2_2_19-Oct	0	0	0	1
178	2	3	bottom	NA	19	10	19-Oct	2017	18/12/2017	NA	29	16	16	0	NA	142	34	2	178_2_3_19-Oct	12.5	12.5	0.125	0.3125
178	2	3	top	NA	19	10	19-Oct	2017	18/12/2017	NA	29	16	16	0	NA	143	34	2	178_2_3_19-Oct	12.5	12.5	0.125	0.6875
178	2	4	bottom	NA	19	10	19-Oct	2017	18/12/2017	NA	29	26	26	0	NA	144	34	0	178_2_4_19-Oct	0	0	0	0.846153846153846
178	2	4	top	NA	19	10	19-Oct	2017	18/12/2017	NA	29	16	16	0	NA	145	34	0	178_2_4_19-Oct	0	0	0	0.9375
178	2	5	bottom	NA	19	10	19-Oct	2017	18/12/2017	NA	29	20	20	0	NA	146	34	0	178_2_5_19-Oct	0	0	0	1
178	2	5	top	NA	19	10	19-Oct	2017	18/12/2017	NA	29	8	8	0	NA	147	34	0	178_2_5_19-Oct	0	0	0	1
178	2	6	bottom	NA	19	10	19-Oct	2017	18/12/2017	NA	29	19	19	0	NA	148	34	0	178_2_6_19-Oct	0	0	0	1
178	2	6	top	NA	19	10	19-Oct	2017	18/12/2017	NA	29	24	24	0	NA	149	34	0	178_2_6_19-Oct	0	0	0	1
178	2	7	bottom	NA	19	10	19-Oct	2017	18/12/2017	NA	29	20	20	0	NA	150	34	0	178_2_7_19-Oct	0	0	0	1
178	2	7	top	NA	19	10	19-Oct	2017	18/12/2017	NA	29	21	21	0	NA	151	34	0	178_2_7_19-Oct	0	0	0	1
178	2	8	bottom	NA	19	10	19-Oct	2017	18/12/2017	NA	29	15	15	0	NA	152	34	0	178_2_8_19-Oct	0	0	0	0.933333333333333
178	2	8	top	NA	19	10	19-Oct	2017	18/12/2017	NA	29	17	17	0	NA	153	34	0	178_2_8_19-Oct	0	0	0	1
178	2	9	bottom	NA	19	10	19-Oct	2017	18/12/2017	NA	29	18	18	0	NA	154	34	0	178_2_9_19-Oct	0	0	0	0.944444444444444
178	2	9	top	NA	19	10	19-Oct	2017	18/12/2017	NA	29	19	19	0	NA	155	34	0	178_2_9_19-Oct	0	0	0	1
178	1	1	bottom	NA	19	10	19-Oct	2017	18/12/2017	NA	29	15	19	4	NA	120	35	0	178_1_1_19-Oct	0	0	0	1
178	1	1	top	NA	19	10	19-Oct	2017	18/12/2017	NA	29	18	18	0	NA	121	35	0	178_1_1_19-Oct	0	0	0	1
178	1	10	bottom	NA	19	10	19-Oct	2017	18/12/2017	NA	29	23	23	0	NA	136	35	0	178_1_10_19-Oct	0	0	0	1
178	1	10	top	NA	19	10	19-Oct	2017	18/12/2017	NA	29	19	19	0	NA	137	35	0	178_1_10_19-Oct	0	0	0	1
178	1	2	bottom	NA	19	10	19-Oct	2017	18/12/2017	NA	29	16	19	3	NA	138	35	0	178_1_2_19-Oct	0	0	0	0.4375
178	1	2	top	NA	19	10	19-Oct	2017	18/12/2017	NA	29	10	12	2	NA	139	35	0	178_1_2_19-Oct	0	0	0	0.4
178	1	3	bottom	NA	19	10	19-Oct	2017	18/12/2017	NA	29	16	16	0	NA	122	35	1	178_1_3_19-Oct	6.25	6.25	0.0625	1
178	1	3	top	NA	19	10	19-Oct	2017	18/12/2017	NA	29	8	8	0	NA	123	35	0	178_1_3_19-Oct	0	0	0	1
178	1	4	bottom	NA	19	10	19-Oct	2017	18/12/2017	NA	29	20	20	0	NA	124	35	0	178_1_4_19-Oct	0	0	0	1
178	1	4	top	NA	19	10	19-Oct	2017	18/12/2017	NA	29	7	7	0	NA	125	35	0	178_1_4_19-Oct	0	0	0	1
178	1	5	bottom	NA	19	10	19-Oct	2017	18/12/2017	NA	29	19	19	0	NA	126	35	0	178_1_5_19-Oct	0	0	0	1
178	1	5	top	NA	19	10	19-Oct	2017	18/12/2017	NA	29	14	14	0	NA	127	35	0	178_1_5_19-Oct	0	0	0	1
178	1	6	bottom	NA	19	10	19-Oct	2017	18/12/2017	NA	29	19	19	0	NA	128	35	0	178_1_6_19-Oct	0	0	0	0.894736842105263
178	1	6	top	NA	19	10	19-Oct	2017	18/12/2017	NA	29	10	10	0	NA	129	35	0	178_1_6_19-Oct	0	0	0	0.8
178	1	7	bottom	NA	19	10	19-Oct	2017	18/12/2017	NA	29	19	19	0	NA	130	35	0	178_1_7_19-Oct	0	0	0	0.947368421052632
178	1	7	top	NA	19	10	19-Oct	2017	18/12/2017	NA	29	15	15	0	NA	131	35	0	178_1_7_19-Oct	0	0	0	1
178	1	8	bottom	NA	19	10	19-Oct	2017	18/12/2017	NA	29	21	21	0	NA	132	35	0	178_1_8_19-Oct	0	0	0	1
178	1	8	top	NA	19	10	19-Oct	2017	18/12/2017	NA	29	22	22	0	NA	133	35	0	178_1_8_19-Oct	0	0	0	0.954545454545455
178	1	9	bottom	NA	19	10	19-Oct	2017	18/12/2017	NA	29	21	23	2	NA	134	35	0	178_1_9_19-Oct	0	0	0	1
178	1	9	top	NA	19	10	19-Oct	2017	18/12/2017	NA	29	13	15	2	NA	135	35	0	178_1_9_19-Oct	0	0	0	1
178	2	1	bottom	NA	19	10	19-Oct	2017	18/12/2017	NA	29	10	10	0	NA	140	35	0	178_2_1_19-Oct	0	0	0	0.5
178	2	1	top	NA	19	10	19-Oct	2017	18/12/2017	NA	29	13	13	0	NA	141	35	0	178_2_1_19-Oct	0	0	0	0.769230769230769
178	2	10	bottom	NA	19	10	19-Oct	2017	18/12/2017	NA	29	16	16	0	NA	156	35	0	178_2_10_19-Oct	0	0	0	0.875
178	2	10	top	NA	19	10	19-Oct	2017	18/12/2017	NA	29	22	22	0	NA	157	35	0	178_2_10_19-Oct	0	0	0	1
178	2	2	bottom	NA	19	10	19-Oct	2017	18/12/2017	NA	29	19	19	0	NA	158	35	0	178_2_2_19-Oct	0	0	0	0.947368421052632
178	2	2	top	NA	19	10	19-Oct	2017	18/12/2017	NA	29	20	20	0	NA	159	35	0	178_2_2_19-Oct	0	0	0	1
178	2	3	bottom	NA	19	10	19-Oct	2017	18/12/2017	NA	29	16	16	0	NA	142	35	0	178_2_3_19-Oct	0	0	0	0.3125
178	2	3	top	NA	19	10	19-Oct	2017	18/12/2017	NA	29	16	16	0	NA	143	35	0	178_2_3_19-Oct	0	0	0	0.6875
178	2	4	bottom	NA	19	10	19-Oct	2017	18/12/2017	NA	29	26	26	0	NA	144	35	0	178_2_4_19-Oct	0	0	0	0.846153846153846
178	2	4	top	NA	19	10	19-Oct	2017	18/12/2017	NA	29	16	16	0	NA	145	35	0	178_2_4_19-Oct	0	0	0	0.9375
178	2	5	bottom	NA	19	10	19-Oct	2017	18/12/2017	NA	29	20	20	0	NA	146	35	0	178_2_5_19-Oct	0	0	0	1
178	2	5	top	NA	19	10	19-Oct	2017	18/12/2017	NA	29	8	8	0	NA	147	35	0	178_2_5_19-Oct	0	0	0	1
178	2	6	bottom	NA	19	10	19-Oct	2017	18/12/2017	NA	29	19	19	0	NA	148	35	0	178_2_6_19-Oct	0	0	0	1
178	2	6	top	NA	19	10	19-Oct	2017	18/12/2017	NA	29	24	24	0	NA	149	35	0	178_2_6_19-Oct	0	0	0	1
178	2	7	bottom	NA	19	10	19-Oct	2017	18/12/2017	NA	29	20	20	0	NA	150	35	0	178_2_7_19-Oct	0	0	0	1
178	2	7	top	NA	19	10	19-Oct	2017	18/12/2017	NA	29	21	21	0	NA	151	35	0	178_2_7_19-Oct	0	0	0	1
178	2	8	bottom	NA	19	10	19-Oct	2017	18/12/2017	NA	29	15	15	0	NA	152	35	0	178_2_8_19-Oct	0	0	0	0.933333333333333
178	2	8	top	NA	19	10	19-Oct	2017	18/12/2017	NA	29	17	17	0	NA	153	35	0	178_2_8_19-Oct	0	0	0	1
178	2	9	bottom	NA	19	10	19-Oct	2017	18/12/2017	NA	29	18	18	0	NA	154	35	0	178_2_9_19-Oct	0	0	0	0.944444444444444
178	2	9	top	NA	19	10	19-Oct	2017	18/12/2017	NA	29	19	19	0	NA	155	35	0	178_2_9_19-Oct	0	0	0	1
178	1	1	bottom	NA	19	10	19-Oct	2017	18/12/2017	NA	29	15	19	4	NA	120	36	0	178_1_1_19-Oct	0	0	0	1
178	1	1	top	NA	19	10	19-Oct	2017	18/12/2017	NA	29	18	18	0	NA	121	36	0	178_1_1_19-Oct	0	0	0	1
178	1	10	bottom	NA	19	10	19-Oct	2017	18/12/2017	NA	29	23	23	0	NA	136	36	0	178_1_10_19-Oct	0	0	0	1
178	1	10	top	NA	19	10	19-Oct	2017	18/12/2017	NA	29	19	19	0	NA	137	36	0	178_1_10_19-Oct	0	0	0	1
178	1	2	bottom	NA	19	10	19-Oct	2017	18/12/2017	NA	29	16	19	3	NA	138	36	0	178_1_2_19-Oct	0	0	0	0.4375
178	1	2	top	NA	19	10	19-Oct	2017	18/12/2017	NA	29	10	12	2	NA	139	36	0	178_1_2_19-Oct	0	0	0	0.4
178	1	3	bottom	NA	19	10	19-Oct	2017	18/12/2017	NA	29	16	16	0	NA	122	36	0	178_1_3_19-Oct	0	0	0	1
178	1	3	top	NA	19	10	19-Oct	2017	18/12/2017	NA	29	8	8	0	NA	123	36	0	178_1_3_19-Oct	0	0	0	1
178	1	4	bottom	NA	19	10	19-Oct	2017	18/12/2017	NA	29	20	20	0	NA	124	36	0	178_1_4_19-Oct	0	0	0	1
178	1	4	top	NA	19	10	19-Oct	2017	18/12/2017	NA	29	7	7	0	NA	125	36	0	178_1_4_19-Oct	0	0	0	1
178	1	5	bottom	NA	19	10	19-Oct	2017	18/12/2017	NA	29	19	19	0	NA	126	36	0	178_1_5_19-Oct	0	0	0	1
178	1	5	top	NA	19	10	19-Oct	2017	18/12/2017	NA	29	14	14	0	NA	127	36	0	178_1_5_19-Oct	0	0	0	1
178	1	6	bottom	NA	19	10	19-Oct	2017	18/12/2017	NA	29	19	19	0	NA	128	36	0	178_1_6_19-Oct	0	0	0	0.894736842105263
178	1	6	top	NA	19	10	19-Oct	2017	18/12/2017	NA	29	10	10	0	NA	129	36	0	178_1_6_19-Oct	0	0	0	0.8
178	1	7	bottom	NA	19	10	19-Oct	2017	18/12/2017	NA	29	19	19	0	NA	130	36	0	178_1_7_19-Oct	0	0	0	0.947368421052632
178	1	7	top	NA	19	10	19-Oct	2017	18/12/2017	NA	29	15	15	0	NA	131	36	0	178_1_7_19-Oct	0	0	0	1
178	1	8	bottom	NA	19	10	19-Oct	2017	18/12/2017	NA	29	21	21	0	NA	132	36	0	178_1_8_19-Oct	0	0	0	1
178	1	8	top	NA	19	10	19-Oct	2017	18/12/2017	NA	29	22	22	0	NA	133	36	0	178_1_8_19-Oct	0	0	0	0.954545454545455
178	1	9	bottom	NA	19	10	19-Oct	2017	18/12/2017	NA	29	21	23	2	NA	134	36	0	178_1_9_19-Oct	0	0	0	1
178	1	9	top	NA	19	10	19-Oct	2017	18/12/2017	NA	29	13	15	2	NA	135	36	0	178_1_9_19-Oct	0	0	0	1
178	2	1	bottom	NA	19	10	19-Oct	2017	18/12/2017	NA	29	10	10	0	NA	140	36	0	178_2_1_19-Oct	0	0	0	0.5
178	2	1	top	NA	19	10	19-Oct	2017	18/12/2017	NA	29	13	13	0	NA	141	36	0	178_2_1_19-Oct	0	0	0	0.769230769230769
178	2	10	bottom	NA	19	10	19-Oct	2017	18/12/2017	NA	29	16	16	0	NA	156	36	0	178_2_10_19-Oct	0	0	0	0.875
178	2	10	top	NA	19	10	19-Oct	2017	18/12/2017	NA	29	22	22	0	NA	157	36	0	178_2_10_19-Oct	0	0	0	1
178	2	2	bottom	NA	19	10	19-Oct	2017	18/12/2017	NA	29	19	19	0	NA	158	36	0	178_2_2_19-Oct	0	0	0	0.947368421052632
178	2	2	top	NA	19	10	19-Oct	2017	18/12/2017	NA	29	20	20	0	NA	159	36	0	178_2_2_19-Oct	0	0	0	1
178	2	3	bottom	NA	19	10	19-Oct	2017	18/12/2017	NA	29	16	16	0	NA	142	36	0	178_2_3_19-Oct	0	0	0	0.3125
178	2	3	top	NA	19	10	19-Oct	2017	18/12/2017	NA	29	16	16	0	NA	143	36	0	178_2_3_19-Oct	0	0	0	0.6875
178	2	4	bottom	NA	19	10	19-Oct	2017	18/12/2017	NA	29	26	26	0	NA	144	36	0	178_2_4_19-Oct	0	0	0	0.846153846153846
178	2	4	top	NA	19	10	19-Oct	2017	18/12/2017	NA	29	16	16	0	NA	145	36	0	178_2_4_19-Oct	0	0	0	0.9375
178	2	5	bottom	NA	19	10	19-Oct	2017	18/12/2017	NA	29	20	20	0	NA	146	36	0	178_2_5_19-Oct	0	0	0	1
178	2	5	top	NA	19	10	19-Oct	2017	18/12/2017	NA	29	8	8	0	NA	147	36	0	178_2_5_19-Oct	0	0	0	1
178	2	6	bottom	NA	19	10	19-Oct	2017	18/12/2017	NA	29	19	19	0	NA	148	36	0	178_2_6_19-Oct	0	0	0	1
178	2	6	top	NA	19	10	19-Oct	2017	18/12/2017	NA	29	24	24	0	NA	149	36	0	178_2_6_19-Oct	0	0	0	1
178	2	7	bottom	NA	19	10	19-Oct	2017	18/12/2017	NA	29	20	20	0	NA	150	36	0	178_2_7_19-Oct	0	0	0	1
178	2	7	top	NA	19	10	19-Oct	2017	18/12/2017	NA	29	21	21	0	NA	151	36	0	178_2_7_19-Oct	0	0	0	1
178	2	8	bottom	NA	19	10	19-Oct	2017	18/12/2017	NA	29	15	15	0	NA	152	36	0	178_2_8_19-Oct	0	0	0	0.933333333333333
178	2	8	top	NA	19	10	19-Oct	2017	18/12/2017	NA	29	17	17	0	NA	153	36	0	178_2_8_19-Oct	0	0	0	1
178	2	9	bottom	NA	19	10	19-Oct	2017	18/12/2017	NA	29	18	18	0	NA	154	36	0	178_2_9_19-Oct	0	0	0	0.944444444444444
178	2	9	top	NA	19	10	19-Oct	2017	18/12/2017	NA	29	19	19	0	NA	155	36	0	178_2_9_19-Oct	0	0	0	1
178	1	1	bottom	NA	19	10	19-Oct	2017	18/12/2017	NA	29	15	19	4	NA	120	37	0	178_1_1_19-Oct	0	0	0	1
178	1	1	top	NA	19	10	19-Oct	2017	18/12/2017	NA	29	18	18	0	NA	121	37	0	178_1_1_19-Oct	0	0	0	1
178	1	10	bottom	NA	19	10	19-Oct	2017	18/12/2017	NA	29	23	23	0	NA	136	37	0	178_1_10_19-Oct	0	0	0	1
178	1	10	top	NA	19	10	19-Oct	2017	18/12/2017	NA	29	19	19	0	NA	137	37	0	178_1_10_19-Oct	0	0	0	1
178	1	2	bottom	NA	19	10	19-Oct	2017	18/12/2017	NA	29	16	19	3	NA	138	37	1	178_1_2_19-Oct	5.26315789473684	6.25	0.0625	0.5
178	1	2	top	NA	19	10	19-Oct	2017	18/12/2017	NA	29	10	12	2	NA	139	37	0	178_1_2_19-Oct	0	0	0	0.4
178	1	3	bottom	NA	19	10	19-Oct	2017	18/12/2017	NA	29	16	16	0	NA	122	37	0	178_1_3_19-Oct	0	0	0	1
178	1	3	top	NA	19	10	19-Oct	2017	18/12/2017	NA	29	8	8	0	NA	123	37	0	178_1_3_19-Oct	0	0	0	1
178	1	4	bottom	NA	19	10	19-Oct	2017	18/12/2017	NA	29	20	20	0	NA	124	37	0	178_1_4_19-Oct	0	0	0	1
178	1	4	top	NA	19	10	19-Oct	2017	18/12/2017	NA	29	7	7	0	NA	125	37	0	178_1_4_19-Oct	0	0	0	1
178	1	5	bottom	NA	19	10	19-Oct	2017	18/12/2017	NA	29	19	19	0	NA	126	37	0	178_1_5_19-Oct	0	0	0	1
178	1	5	top	NA	19	10	19-Oct	2017	18/12/2017	NA	29	14	14	0	NA	127	37	0	178_1_5_19-Oct	0	0	0	1
178	1	6	bottom	NA	19	10	19-Oct	2017	18/12/2017	NA	29	19	19	0	NA	128	37	0	178_1_6_19-Oct	0	0	0	0.894736842105263
178	1	6	top	NA	19	10	19-Oct	2017	18/12/2017	NA	29	10	10	0	NA	129	37	0	178_1_6_19-Oct	0	0	0	0.8
178	1	7	bottom	NA	19	10	19-Oct	2017	18/12/2017	NA	29	19	19	0	NA	130	37	1	178_1_7_19-Oct	5.26315789473684	5.26315789473684	0.0526315789473684	1
178	1	7	top	NA	19	10	19-Oct	2017	18/12/2017	NA	29	15	15	0	NA	131	37	0	178_1_7_19-Oct	0	0	0	1
178	1	8	bottom	NA	19	10	19-Oct	2017	18/12/2017	NA	29	21	21	0	NA	132	37	0	178_1_8_19-Oct	0	0	0	1
178	1	8	top	NA	19	10	19-Oct	2017	18/12/2017	NA	29	22	22	0	NA	133	37	0	178_1_8_19-Oct	0	0	0	0.954545454545455
178	1	9	bottom	NA	19	10	19-Oct	2017	18/12/2017	NA	29	21	23	2	NA	134	37	0	178_1_9_19-Oct	0	0	0	1
178	1	9	top	NA	19	10	19-Oct	2017	18/12/2017	NA	29	13	15	2	NA	135	37	0	178_1_9_19-Oct	0	0	0	1
178	2	1	bottom	NA	19	10	19-Oct	2017	18/12/2017	NA	29	10	10	0	NA	140	37	0	178_2_1_19-Oct	0	0	0	0.5
178	2	1	top	NA	19	10	19-Oct	2017	18/12/2017	NA	29	13	13	0	NA	141	37	0	178_2_1_19-Oct	0	0	0	0.769230769230769
178	2	10	bottom	NA	19	10	19-Oct	2017	18/12/2017	NA	29	16	16	0	NA	156	37	1	178_2_10_19-Oct	6.25	6.25	0.0625	0.9375
178	2	10	top	NA	19	10	19-Oct	2017	18/12/2017	NA	29	22	22	0	NA	157	37	0	178_2_10_19-Oct	0	0	0	1
178	2	2	bottom	NA	19	10	19-Oct	2017	18/12/2017	NA	29	19	19	0	NA	158	37	1	178_2_2_19-Oct	5.26315789473684	5.26315789473684	0.0526315789473684	1
178	2	2	top	NA	19	10	19-Oct	2017	18/12/2017	NA	29	20	20	0	NA	159	37	0	178_2_2_19-Oct	0	0	0	1
178	2	3	bottom	NA	19	10	19-Oct	2017	18/12/2017	NA	29	16	16	0	NA	142	37	1	178_2_3_19-Oct	6.25	6.25	0.0625	0.375
178	2	3	top	NA	19	10	19-Oct	2017	18/12/2017	NA	29	16	16	0	NA	143	37	0	178_2_3_19-Oct	0	0	0	0.6875
178	2	4	bottom	NA	19	10	19-Oct	2017	18/12/2017	NA	29	26	26	0	NA	144	37	0	178_2_4_19-Oct	0	0	0	0.846153846153846
178	2	4	top	NA	19	10	19-Oct	2017	18/12/2017	NA	29	16	16	0	NA	145	37	0	178_2_4_19-Oct	0	0	0	0.9375
178	2	5	bottom	NA	19	10	19-Oct	2017	18/12/2017	NA	29	20	20	0	NA	146	37	0	178_2_5_19-Oct	0	0	0	1
178	2	5	top	NA	19	10	19-Oct	2017	18/12/2017	NA	29	8	8	0	NA	147	37	0	178_2_5_19-Oct	0	0	0	1
178	2	6	bottom	NA	19	10	19-Oct	2017	18/12/2017	NA	29	19	19	0	NA	148	37	0	178_2_6_19-Oct	0	0	0	1
178	2	6	top	NA	19	10	19-Oct	2017	18/12/2017	NA	29	24	24	0	NA	149	37	0	178_2_6_19-Oct	0	0	0	1
178	2	7	bottom	NA	19	10	19-Oct	2017	18/12/2017	NA	29	20	20	0	NA	150	37	0	178_2_7_19-Oct	0	0	0	1
178	2	7	top	NA	19	10	19-Oct	2017	18/12/2017	NA	29	21	21	0	NA	151	37	0	178_2_7_19-Oct	0	0	0	1
178	2	8	bottom	NA	19	10	19-Oct	2017	18/12/2017	NA	29	15	15	0	NA	152	37	0	178_2_8_19-Oct	0	0	0	0.933333333333333
178	2	8	top	NA	19	10	19-Oct	2017	18/12/2017	NA	29	17	17	0	NA	153	37	0	178_2_8_19-Oct	0	0	0	1
178	2	9	bottom	NA	19	10	19-Oct	2017	18/12/2017	NA	29	18	18	0	NA	154	37	0	178_2_9_19-Oct	0	0	0	0.944444444444444
178	2	9	top	NA	19	10	19-Oct	2017	18/12/2017	NA	29	19	19	0	NA	155	37	0	178_2_9_19-Oct	0	0	0	1
178	1	1	bottom	NA	19	10	19-Oct	2017	18/12/2017	NA	29	15	19	4	NA	120	38	0	178_1_1_19-Oct	0	0	0	1
178	1	1	top	NA	19	10	19-Oct	2017	18/12/2017	NA	29	18	18	0	NA	121	38	0	178_1_1_19-Oct	0	0	0	1
178	1	10	bottom	NA	19	10	19-Oct	2017	18/12/2017	NA	29	23	23	0	NA	136	38	0	178_1_10_19-Oct	0	0	0	1
178	1	10	top	NA	19	10	19-Oct	2017	18/12/2017	NA	29	19	19	0	NA	137	38	0	178_1_10_19-Oct	0	0	0	1
178	1	2	bottom	NA	19	10	19-Oct	2017	18/12/2017	NA	29	16	19	3	NA	138	38	0	178_1_2_19-Oct	0	0	0	0.5
178	1	2	top	NA	19	10	19-Oct	2017	18/12/2017	NA	29	10	12	2	NA	139	38	1	178_1_2_19-Oct	8.33333333333333	10	0.1	0.5
178	1	3	bottom	NA	19	10	19-Oct	2017	18/12/2017	NA	29	16	16	0	NA	122	38	0	178_1_3_19-Oct	0	0	0	1
178	1	3	top	NA	19	10	19-Oct	2017	18/12/2017	NA	29	8	8	0	NA	123	38	0	178_1_3_19-Oct	0	0	0	1
178	1	4	bottom	NA	19	10	19-Oct	2017	18/12/2017	NA	29	20	20	0	NA	124	38	0	178_1_4_19-Oct	0	0	0	1
178	1	4	top	NA	19	10	19-Oct	2017	18/12/2017	NA	29	7	7	0	NA	125	38	0	178_1_4_19-Oct	0	0	0	1
178	1	5	bottom	NA	19	10	19-Oct	2017	18/12/2017	NA	29	19	19	0	NA	126	38	0	178_1_5_19-Oct	0	0	0	1
178	1	5	top	NA	19	10	19-Oct	2017	18/12/2017	NA	29	14	14	0	NA	127	38	0	178_1_5_19-Oct	0	0	0	1
178	1	6	bottom	NA	19	10	19-Oct	2017	18/12/2017	NA	29	19	19	0	NA	128	38	0	178_1_6_19-Oct	0	0	0	0.894736842105263
178	1	6	top	NA	19	10	19-Oct	2017	18/12/2017	NA	29	10	10	0	NA	129	38	0	178_1_6_19-Oct	0	0	0	0.8
178	1	7	bottom	NA	19	10	19-Oct	2017	18/12/2017	NA	29	19	19	0	NA	130	38	0	178_1_7_19-Oct	0	0	0	1
178	1	7	top	NA	19	10	19-Oct	2017	18/12/2017	NA	29	15	15	0	NA	131	38	0	178_1_7_19-Oct	0	0	0	1
178	1	8	bottom	NA	19	10	19-Oct	2017	18/12/2017	NA	29	21	21	0	NA	132	38	0	178_1_8_19-Oct	0	0	0	1
178	1	8	top	NA	19	10	19-Oct	2017	18/12/2017	NA	29	22	22	0	NA	133	38	0	178_1_8_19-Oct	0	0	0	0.954545454545455
178	1	9	bottom	NA	19	10	19-Oct	2017	18/12/2017	NA	29	21	23	2	NA	134	38	0	178_1_9_19-Oct	0	0	0	1
178	1	9	top	NA	19	10	19-Oct	2017	18/12/2017	NA	29	13	15	2	NA	135	38	0	178_1_9_19-Oct	0	0	0	1
178	2	1	bottom	NA	19	10	19-Oct	2017	18/12/2017	NA	29	10	10	0	NA	140	38	0	178_2_1_19-Oct	0	0	0	0.5
178	2	1	top	NA	19	10	19-Oct	2017	18/12/2017	NA	29	13	13	0	NA	141	38	1	178_2_1_19-Oct	7.69230769230769	7.69230769230769	0.0769230769230769	0.846153846153846
178	2	10	bottom	NA	19	10	19-Oct	2017	18/12/2017	NA	29	16	16	0	NA	156	38	0	178_2_10_19-Oct	0	0	0	0.9375
178	2	10	top	NA	19	10	19-Oct	2017	18/12/2017	NA	29	22	22	0	NA	157	38	0	178_2_10_19-Oct	0	0	0	1
178	2	2	bottom	NA	19	10	19-Oct	2017	18/12/2017	NA	29	19	19	0	NA	158	38	0	178_2_2_19-Oct	0	0	0	1
178	2	2	top	NA	19	10	19-Oct	2017	18/12/2017	NA	29	20	20	0	NA	159	38	0	178_2_2_19-Oct	0	0	0	1
178	2	3	bottom	NA	19	10	19-Oct	2017	18/12/2017	NA	29	16	16	0	NA	142	38	1	178_2_3_19-Oct	6.25	6.25	0.0625	0.4375
178	2	3	top	NA	19	10	19-Oct	2017	18/12/2017	NA	29	16	16	0	NA	143	38	0	178_2_3_19-Oct	0	0	0	0.6875
178	2	4	bottom	NA	19	10	19-Oct	2017	18/12/2017	NA	29	26	26	0	NA	144	38	1	178_2_4_19-Oct	3.84615384615385	3.84615384615385	0.0384615384615385	0.884615384615385
178	2	4	top	NA	19	10	19-Oct	2017	18/12/2017	NA	29	16	16	0	NA	145	38	0	178_2_4_19-Oct	0	0	0	0.9375
178	2	5	bottom	NA	19	10	19-Oct	2017	18/12/2017	NA	29	20	20	0	NA	146	38	0	178_2_5_19-Oct	0	0	0	1
178	2	5	top	NA	19	10	19-Oct	2017	18/12/2017	NA	29	8	8	0	NA	147	38	0	178_2_5_19-Oct	0	0	0	1
178	2	6	bottom	NA	19	10	19-Oct	2017	18/12/2017	NA	29	19	19	0	NA	148	38	0	178_2_6_19-Oct	0	0	0	1
178	2	6	top	NA	19	10	19-Oct	2017	18/12/2017	NA	29	24	24	0	NA	149	38	0	178_2_6_19-Oct	0	0	0	1
178	2	7	bottom	NA	19	10	19-Oct	2017	18/12/2017	NA	29	20	20	0	NA	150	38	0	178_2_7_19-Oct	0	0	0	1
178	2	7	top	NA	19	10	19-Oct	2017	18/12/2017	NA	29	21	21	0	NA	151	38	0	178_2_7_19-Oct	0	0	0	1
178	2	8	bottom	NA	19	10	19-Oct	2017	18/12/2017	NA	29	15	15	0	NA	152	38	0	178_2_8_19-Oct	0	0	0	0.933333333333333
178	2	8	top	NA	19	10	19-Oct	2017	18/12/2017	NA	29	17	17	0	NA	153	38	0	178_2_8_19-Oct	0	0	0	1
178	2	9	bottom	NA	19	10	19-Oct	2017	18/12/2017	NA	29	18	18	0	NA	154	38	1	178_2_9_19-Oct	5.55555555555556	5.55555555555556	0.0555555555555556	1
178	2	9	top	NA	19	10	19-Oct	2017	18/12/2017	NA	29	19	19	0	NA	155	38	0	178_2_9_19-Oct	0	0	0	1
178	1	1	bottom	NA	19	10	19-Oct	2017	18/12/2017	NA	29	15	19	4	NA	120	39	0	178_1_1_19-Oct	0	0	0	1
178	1	1	top	NA	19	10	19-Oct	2017	18/12/2017	NA	29	18	18	0	NA	121	39	0	178_1_1_19-Oct	0	0	0	1
178	1	10	bottom	NA	19	10	19-Oct	2017	18/12/2017	NA	29	23	23	0	NA	136	39	0	178_1_10_19-Oct	0	0	0	1
178	1	10	top	NA	19	10	19-Oct	2017	18/12/2017	NA	29	19	19	0	NA	137	39	0	178_1_10_19-Oct	0	0	0	1
178	1	2	bottom	NA	19	10	19-Oct	2017	18/12/2017	NA	29	16	19	3	NA	138	39	0	178_1_2_19-Oct	0	0	0	0.5
178	1	2	top	NA	19	10	19-Oct	2017	18/12/2017	NA	29	10	12	2	NA	139	39	0	178_1_2_19-Oct	0	0	0	0.5
178	1	3	bottom	NA	19	10	19-Oct	2017	18/12/2017	NA	29	16	16	0	NA	122	39	0	178_1_3_19-Oct	0	0	0	1
178	1	3	top	NA	19	10	19-Oct	2017	18/12/2017	NA	29	8	8	0	NA	123	39	0	178_1_3_19-Oct	0	0	0	1
178	1	4	bottom	NA	19	10	19-Oct	2017	18/12/2017	NA	29	20	20	0	NA	124	39	0	178_1_4_19-Oct	0	0	0	1
178	1	4	top	NA	19	10	19-Oct	2017	18/12/2017	NA	29	7	7	0	NA	125	39	0	178_1_4_19-Oct	0	0	0	1
178	1	5	bottom	NA	19	10	19-Oct	2017	18/12/2017	NA	29	19	19	0	NA	126	39	0	178_1_5_19-Oct	0	0	0	1
178	1	5	top	NA	19	10	19-Oct	2017	18/12/2017	NA	29	14	14	0	NA	127	39	0	178_1_5_19-Oct	0	0	0	1
178	1	6	bottom	NA	19	10	19-Oct	2017	18/12/2017	NA	29	19	19	0	NA	128	39	0	178_1_6_19-Oct	0	0	0	0.894736842105263
178	1	6	top	NA	19	10	19-Oct	2017	18/12/2017	NA	29	10	10	0	NA	129	39	0	178_1_6_19-Oct	0	0	0	0.8
178	1	7	bottom	NA	19	10	19-Oct	2017	18/12/2017	NA	29	19	19	0	NA	130	39	0	178_1_7_19-Oct	0	0	0	1
178	1	7	top	NA	19	10	19-Oct	2017	18/12/2017	NA	29	15	15	0	NA	131	39	0	178_1_7_19-Oct	0	0	0	1
178	1	8	bottom	NA	19	10	19-Oct	2017	18/12/2017	NA	29	21	21	0	NA	132	39	0	178_1_8_19-Oct	0	0	0	1
178	1	8	top	NA	19	10	19-Oct	2017	18/12/2017	NA	29	22	22	0	NA	133	39	0	178_1_8_19-Oct	0	0	0	0.954545454545455
178	1	9	bottom	NA	19	10	19-Oct	2017	18/12/2017	NA	29	21	23	2	NA	134	39	0	178_1_9_19-Oct	0	0	0	1
178	1	9	top	NA	19	10	19-Oct	2017	18/12/2017	NA	29	13	15	2	NA	135	39	0	178_1_9_19-Oct	0	0	0	1
178	2	1	bottom	NA	19	10	19-Oct	2017	18/12/2017	NA	29	10	10	0	NA	140	39	0	178_2_1_19-Oct	0	0	0	0.5
178	2	1	top	NA	19	10	19-Oct	2017	18/12/2017	NA	29	13	13	0	NA	141	39	0	178_2_1_19-Oct	0	0	0	0.846153846153846
178	2	10	bottom	NA	19	10	19-Oct	2017	18/12/2017	NA	29	16	16	0	NA	156	39	0	178_2_10_19-Oct	0	0	0	0.9375
178	2	10	top	NA	19	10	19-Oct	2017	18/12/2017	NA	29	22	22	0	NA	157	39	0	178_2_10_19-Oct	0	0	0	1
178	2	2	bottom	NA	19	10	19-Oct	2017	18/12/2017	NA	29	19	19	0	NA	158	39	0	178_2_2_19-Oct	0	0	0	1
178	2	2	top	NA	19	10	19-Oct	2017	18/12/2017	NA	29	20	20	0	NA	159	39	0	178_2_2_19-Oct	0	0	0	1
178	2	3	bottom	NA	19	10	19-Oct	2017	18/12/2017	NA	29	16	16	0	NA	142	39	1	178_2_3_19-Oct	6.25	6.25	0.0625	0.5
178	2	3	top	NA	19	10	19-Oct	2017	18/12/2017	NA	29	16	16	0	NA	143	39	0	178_2_3_19-Oct	0	0	0	0.6875
178	2	4	bottom	NA	19	10	19-Oct	2017	18/12/2017	NA	29	26	26	0	NA	144	39	0	178_2_4_19-Oct	0	0	0	0.884615384615385
178	2	4	top	NA	19	10	19-Oct	2017	18/12/2017	NA	29	16	16	0	NA	145	39	0	178_2_4_19-Oct	0	0	0	0.9375
178	2	5	bottom	NA	19	10	19-Oct	2017	18/12/2017	NA	29	20	20	0	NA	146	39	0	178_2_5_19-Oct	0	0	0	1
178	2	5	top	NA	19	10	19-Oct	2017	18/12/2017	NA	29	8	8	0	NA	147	39	0	178_2_5_19-Oct	0	0	0	1
178	2	6	bottom	NA	19	10	19-Oct	2017	18/12/2017	NA	29	19	19	0	NA	148	39	0	178_2_6_19-Oct	0	0	0	1
178	2	6	top	NA	19	10	19-Oct	2017	18/12/2017	NA	29	24	24	0	NA	149	39	0	178_2_6_19-Oct	0	0	0	1
178	2	7	bottom	NA	19	10	19-Oct	2017	18/12/2017	NA	29	20	20	0	NA	150	39	0	178_2_7_19-Oct	0	0	0	1
178	2	7	top	NA	19	10	19-Oct	2017	18/12/2017	NA	29	21	21	0	NA	151	39	0	178_2_7_19-Oct	0	0	0	1
178	2	8	bottom	NA	19	10	19-Oct	2017	18/12/2017	NA	29	15	15	0	NA	152	39	0	178_2_8_19-Oct	0	0	0	0.933333333333333
178	2	8	top	NA	19	10	19-Oct	2017	18/12/2017	NA	29	17	17	0	NA	153	39	0	178_2_8_19-Oct	0	0	0	1
178	2	9	bottom	NA	19	10	19-Oct	2017	18/12/2017	NA	29	18	18	0	NA	154	39	0	178_2_9_19-Oct	0	0	0	1
178	2	9	top	NA	19	10	19-Oct	2017	18/12/2017	NA	29	19	19	0	NA	155	39	0	178_2_9_19-Oct	0	0	0	1
178	1	1	bottom	NA	19	10	19-Oct	2017	18/12/2017	NA	29	15	19	4	NA	120	40	0	178_1_1_19-Oct	0	0	0	1
178	1	1	top	NA	19	10	19-Oct	2017	18/12/2017	NA	29	18	18	0	NA	121	40	0	178_1_1_19-Oct	0	0	0	1
178	1	10	bottom	NA	19	10	19-Oct	2017	18/12/2017	NA	29	23	23	0	NA	136	40	0	178_1_10_19-Oct	0	0	0	1
178	1	10	top	NA	19	10	19-Oct	2017	18/12/2017	NA	29	19	19	0	NA	137	40	0	178_1_10_19-Oct	0	0	0	1
178	1	2	bottom	NA	19	10	19-Oct	2017	18/12/2017	NA	29	16	19	3	NA	138	40	0	178_1_2_19-Oct	0	0	0	0.5
178	1	2	top	NA	19	10	19-Oct	2017	18/12/2017	NA	29	10	12	2	NA	139	40	0	178_1_2_19-Oct	0	0	0	0.5
178	1	3	bottom	NA	19	10	19-Oct	2017	18/12/2017	NA	29	16	16	0	NA	122	40	0	178_1_3_19-Oct	0	0	0	1
178	1	3	top	NA	19	10	19-Oct	2017	18/12/2017	NA	29	8	8	0	NA	123	40	0	178_1_3_19-Oct	0	0	0	1
178	1	4	bottom	NA	19	10	19-Oct	2017	18/12/2017	NA	29	20	20	0	NA	124	40	0	178_1_4_19-Oct	0	0	0	1
178	1	4	top	NA	19	10	19-Oct	2017	18/12/2017	NA	29	7	7	0	NA	125	40	0	178_1_4_19-Oct	0	0	0	1
178	1	5	bottom	NA	19	10	19-Oct	2017	18/12/2017	NA	29	19	19	0	NA	126	40	0	178_1_5_19-Oct	0	0	0	1
178	1	5	top	NA	19	10	19-Oct	2017	18/12/2017	NA	29	14	14	0	NA	127	40	0	178_1_5_19-Oct	0	0	0	1
178	1	6	bottom	NA	19	10	19-Oct	2017	18/12/2017	NA	29	19	19	0	NA	128	40	0	178_1_6_19-Oct	0	0	0	0.894736842105263
178	1	6	top	NA	19	10	19-Oct	2017	18/12/2017	NA	29	10	10	0	NA	129	40	0	178_1_6_19-Oct	0	0	0	0.8
178	1	7	bottom	NA	19	10	19-Oct	2017	18/12/2017	NA	29	19	19	0	NA	130	40	0	178_1_7_19-Oct	0	0	0	1
178	1	7	top	NA	19	10	19-Oct	2017	18/12/2017	NA	29	15	15	0	NA	131	40	0	178_1_7_19-Oct	0	0	0	1
178	1	8	bottom	NA	19	10	19-Oct	2017	18/12/2017	NA	29	21	21	0	NA	132	40	0	178_1_8_19-Oct	0	0	0	1
178	1	8	top	NA	19	10	19-Oct	2017	18/12/2017	NA	29	22	22	0	NA	133	40	0	178_1_8_19-Oct	0	0	0	0.954545454545455
178	1	9	bottom	NA	19	10	19-Oct	2017	18/12/2017	NA	29	21	23	2	NA	134	40	0	178_1_9_19-Oct	0	0	0	1
178	1	9	top	NA	19	10	19-Oct	2017	18/12/2017	NA	29	13	15	2	NA	135	40	0	178_1_9_19-Oct	0	0	0	1
178	2	1	bottom	NA	19	10	19-Oct	2017	18/12/2017	NA	29	10	10	0	NA	140	40	0	178_2_1_19-Oct	0	0	0	0.5
178	2	1	top	NA	19	10	19-Oct	2017	18/12/2017	NA	29	13	13	0	NA	141	40	0	178_2_1_19-Oct	0	0	0	0.846153846153846
178	2	10	bottom	NA	19	10	19-Oct	2017	18/12/2017	NA	29	16	16	0	NA	156	40	1	178_2_10_19-Oct	6.25	6.25	0.0625	1
178	2	10	top	NA	19	10	19-Oct	2017	18/12/2017	NA	29	22	22	0	NA	157	40	0	178_2_10_19-Oct	0	0	0	1
178	2	2	bottom	NA	19	10	19-Oct	2017	18/12/2017	NA	29	19	19	0	NA	158	40	0	178_2_2_19-Oct	0	0	0	1
178	2	2	top	NA	19	10	19-Oct	2017	18/12/2017	NA	29	20	20	0	NA	159	40	0	178_2_2_19-Oct	0	0	0	1
178	2	3	bottom	NA	19	10	19-Oct	2017	18/12/2017	NA	29	16	16	0	NA	142	40	1	178_2_3_19-Oct	6.25	6.25	0.0625	0.5625
178	2	3	top	NA	19	10	19-Oct	2017	18/12/2017	NA	29	16	16	0	NA	143	40	0	178_2_3_19-Oct	0	0	0	0.6875
178	2	4	bottom	NA	19	10	19-Oct	2017	18/12/2017	NA	29	26	26	0	NA	144	40	0	178_2_4_19-Oct	0	0	0	0.884615384615385
178	2	4	top	NA	19	10	19-Oct	2017	18/12/2017	NA	29	16	16	0	NA	145	40	0	178_2_4_19-Oct	0	0	0	0.9375
178	2	5	bottom	NA	19	10	19-Oct	2017	18/12/2017	NA	29	20	20	0	NA	146	40	0	178_2_5_19-Oct	0	0	0	1
178	2	5	top	NA	19	10	19-Oct	2017	18/12/2017	NA	29	8	8	0	NA	147	40	0	178_2_5_19-Oct	0	0	0	1
178	2	6	bottom	NA	19	10	19-Oct	2017	18/12/2017	NA	29	19	19	0	NA	148	40	0	178_2_6_19-Oct	0	0	0	1
178	2	6	top	NA	19	10	19-Oct	2017	18/12/2017	NA	29	24	24	0	NA	149	40	0	178_2_6_19-Oct	0	0	0	1
178	2	7	bottom	NA	19	10	19-Oct	2017	18/12/2017	NA	29	20	20	0	NA	150	40	0	178_2_7_19-Oct	0	0	0	1
178	2	7	top	NA	19	10	19-Oct	2017	18/12/2017	NA	29	21	21	0	NA	151	40	0	178_2_7_19-Oct	0	0	0	1
178	2	8	bottom	NA	19	10	19-Oct	2017	18/12/2017	NA	29	15	15	0	NA	152	40	1	178_2_8_19-Oct	6.66666666666667	6.66666666666667	0.0666666666666667	1
178	2	8	top	NA	19	10	19-Oct	2017	18/12/2017	NA	29	17	17	0	NA	153	40	0	178_2_8_19-Oct	0	0	0	1
178	2	9	bottom	NA	19	10	19-Oct	2017	18/12/2017	NA	29	18	18	0	NA	154	40	0	178_2_9_19-Oct	0	0	0	1
178	2	9	top	NA	19	10	19-Oct	2017	18/12/2017	NA	29	19	19	0	NA	155	40	0	178_2_9_19-Oct	0	0	0	1
178	1	1	bottom	NA	19	10	19-Oct	2017	18/12/2017	NA	29	15	19	4	NA	120	41	0	178_1_1_19-Oct	0	0	0	1
178	1	1	top	NA	19	10	19-Oct	2017	18/12/2017	NA	29	18	18	0	NA	121	41	0	178_1_1_19-Oct	0	0	0	1
178	1	10	bottom	NA	19	10	19-Oct	2017	18/12/2017	NA	29	23	23	0	NA	136	41	0	178_1_10_19-Oct	0	0	0	1
178	1	10	top	NA	19	10	19-Oct	2017	18/12/2017	NA	29	19	19	0	NA	137	41	0	178_1_10_19-Oct	0	0	0	1
178	1	2	bottom	NA	19	10	19-Oct	2017	18/12/2017	NA	29	16	19	3	NA	138	41	1	178_1_2_19-Oct	5.26315789473684	6.25	0.0625	0.5625
178	1	2	top	NA	19	10	19-Oct	2017	18/12/2017	NA	29	10	12	2	NA	139	41	0	178_1_2_19-Oct	0	0	0	0.5
178	1	3	bottom	NA	19	10	19-Oct	2017	18/12/2017	NA	29	16	16	0	NA	122	41	0	178_1_3_19-Oct	0	0	0	1
178	1	3	top	NA	19	10	19-Oct	2017	18/12/2017	NA	29	8	8	0	NA	123	41	0	178_1_3_19-Oct	0	0	0	1
178	1	4	bottom	NA	19	10	19-Oct	2017	18/12/2017	NA	29	20	20	0	NA	124	41	0	178_1_4_19-Oct	0	0	0	1
178	1	4	top	NA	19	10	19-Oct	2017	18/12/2017	NA	29	7	7	0	NA	125	41	0	178_1_4_19-Oct	0	0	0	1
178	1	5	bottom	NA	19	10	19-Oct	2017	18/12/2017	NA	29	19	19	0	NA	126	41	0	178_1_5_19-Oct	0	0	0	1
178	1	5	top	NA	19	10	19-Oct	2017	18/12/2017	NA	29	14	14	0	NA	127	41	0	178_1_5_19-Oct	0	0	0	1
178	1	6	bottom	NA	19	10	19-Oct	2017	18/12/2017	NA	29	19	19	0	NA	128	41	1	178_1_6_19-Oct	5.26315789473684	5.26315789473684	0.0526315789473684	0.947368421052632
178	1	6	top	NA	19	10	19-Oct	2017	18/12/2017	NA	29	10	10	0	NA	129	41	0	178_1_6_19-Oct	0	0	0	0.8
178	1	7	bottom	NA	19	10	19-Oct	2017	18/12/2017	NA	29	19	19	0	NA	130	41	0	178_1_7_19-Oct	0	0	0	1
178	1	7	top	NA	19	10	19-Oct	2017	18/12/2017	NA	29	15	15	0	NA	131	41	0	178_1_7_19-Oct	0	0	0	1
178	1	8	bottom	NA	19	10	19-Oct	2017	18/12/2017	NA	29	21	21	0	NA	132	41	0	178_1_8_19-Oct	0	0	0	1
178	1	8	top	NA	19	10	19-Oct	2017	18/12/2017	NA	29	22	22	0	NA	133	41	0	178_1_8_19-Oct	0	0	0	0.954545454545455
178	1	9	bottom	NA	19	10	19-Oct	2017	18/12/2017	NA	29	21	23	2	NA	134	41	0	178_1_9_19-Oct	0	0	0	1
178	1	9	top	NA	19	10	19-Oct	2017	18/12/2017	NA	29	13	15	2	NA	135	41	0	178_1_9_19-Oct	0	0	0	1
178	2	1	bottom	NA	19	10	19-Oct	2017	18/12/2017	NA	29	10	10	0	NA	140	41	0	178_2_1_19-Oct	0	0	0	0.5
178	2	1	top	NA	19	10	19-Oct	2017	18/12/2017	NA	29	13	13	0	NA	141	41	0	178_2_1_19-Oct	0	0	0	0.846153846153846
178	2	10	bottom	NA	19	10	19-Oct	2017	18/12/2017	NA	29	16	16	0	NA	156	41	0	178_2_10_19-Oct	0	0	0	1
178	2	10	top	NA	19	10	19-Oct	2017	18/12/2017	NA	29	22	22	0	NA	157	41	0	178_2_10_19-Oct	0	0	0	1
178	2	2	bottom	NA	19	10	19-Oct	2017	18/12/2017	NA	29	19	19	0	NA	158	41	0	178_2_2_19-Oct	0	0	0	1
178	2	2	top	NA	19	10	19-Oct	2017	18/12/2017	NA	29	20	20	0	NA	159	41	0	178_2_2_19-Oct	0	0	0	1
178	2	3	bottom	NA	19	10	19-Oct	2017	18/12/2017	NA	29	16	16	0	NA	142	41	0	178_2_3_19-Oct	0	0	0	0.5625
178	2	3	top	NA	19	10	19-Oct	2017	18/12/2017	NA	29	16	16	0	NA	143	41	0	178_2_3_19-Oct	0	0	0	0.6875
178	2	4	bottom	NA	19	10	19-Oct	2017	18/12/2017	NA	29	26	26	0	NA	144	41	1	178_2_4_19-Oct	3.84615384615385	3.84615384615385	0.0384615384615385	0.923076923076923
178	2	4	top	NA	19	10	19-Oct	2017	18/12/2017	NA	29	16	16	0	NA	145	41	0	178_2_4_19-Oct	0	0	0	0.9375
178	2	5	bottom	NA	19	10	19-Oct	2017	18/12/2017	NA	29	20	20	0	NA	146	41	0	178_2_5_19-Oct	0	0	0	1
178	2	5	top	NA	19	10	19-Oct	2017	18/12/2017	NA	29	8	8	0	NA	147	41	0	178_2_5_19-Oct	0	0	0	1
178	2	6	bottom	NA	19	10	19-Oct	2017	18/12/2017	NA	29	19	19	0	NA	148	41	0	178_2_6_19-Oct	0	0	0	1
178	2	6	top	NA	19	10	19-Oct	2017	18/12/2017	NA	29	24	24	0	NA	149	41	0	178_2_6_19-Oct	0	0	0	1
178	2	7	bottom	NA	19	10	19-Oct	2017	18/12/2017	NA	29	20	20	0	NA	150	41	0	178_2_7_19-Oct	0	0	0	1
178	2	7	top	NA	19	10	19-Oct	2017	18/12/2017	NA	29	21	21	0	NA	151	41	0	178_2_7_19-Oct	0	0	0	1
178	2	8	bottom	NA	19	10	19-Oct	2017	18/12/2017	NA	29	15	15	0	NA	152	41	0	178_2_8_19-Oct	0	0	0	1
178	2	8	top	NA	19	10	19-Oct	2017	18/12/2017	NA	29	17	17	0	NA	153	41	0	178_2_8_19-Oct	0	0	0	1
178	2	9	bottom	NA	19	10	19-Oct	2017	18/12/2017	NA	29	18	18	0	NA	154	41	0	178_2_9_19-Oct	0	0	0	1
178	2	9	top	NA	19	10	19-Oct	2017	18/12/2017	NA	29	19	19	0	NA	155	41	0	178_2_9_19-Oct	0	0	0	1
178	1	1	bottom	NA	19	10	19-Oct	2017	18/12/2017	NA	29	15	19	4	NA	120	42	0	178_1_1_19-Oct	0	0	0	1
178	1	1	top	NA	19	10	19-Oct	2017	18/12/2017	NA	29	18	18	0	NA	121	42	0	178_1_1_19-Oct	0	0	0	1
178	1	10	bottom	NA	19	10	19-Oct	2017	18/12/2017	NA	29	23	23	0	NA	136	42	0	178_1_10_19-Oct	0	0	0	1
178	1	10	top	NA	19	10	19-Oct	2017	18/12/2017	NA	29	19	19	0	NA	137	42	0	178_1_10_19-Oct	0	0	0	1
178	1	2	bottom	NA	19	10	19-Oct	2017	18/12/2017	NA	29	16	19	3	NA	138	42	0	178_1_2_19-Oct	0	0	0	0.5625
178	1	2	top	NA	19	10	19-Oct	2017	18/12/2017	NA	29	10	12	2	NA	139	42	0	178_1_2_19-Oct	0	0	0	0.5
178	1	3	bottom	NA	19	10	19-Oct	2017	18/12/2017	NA	29	16	16	0	NA	122	42	0	178_1_3_19-Oct	0	0	0	1
178	1	3	top	NA	19	10	19-Oct	2017	18/12/2017	NA	29	8	8	0	NA	123	42	0	178_1_3_19-Oct	0	0	0	1
178	1	4	bottom	NA	19	10	19-Oct	2017	18/12/2017	NA	29	20	20	0	NA	124	42	0	178_1_4_19-Oct	0	0	0	1
178	1	4	top	NA	19	10	19-Oct	2017	18/12/2017	NA	29	7	7	0	NA	125	42	0	178_1_4_19-Oct	0	0	0	1
178	1	5	bottom	NA	19	10	19-Oct	2017	18/12/2017	NA	29	19	19	0	NA	126	42	0	178_1_5_19-Oct	0	0	0	1
178	1	5	top	NA	19	10	19-Oct	2017	18/12/2017	NA	29	14	14	0	NA	127	42	0	178_1_5_19-Oct	0	0	0	1
178	1	6	bottom	NA	19	10	19-Oct	2017	18/12/2017	NA	29	19	19	0	NA	128	42	0	178_1_6_19-Oct	0	0	0	0.947368421052632
178	1	6	top	NA	19	10	19-Oct	2017	18/12/2017	NA	29	10	10	0	NA	129	42	0	178_1_6_19-Oct	0	0	0	0.8
178	1	7	bottom	NA	19	10	19-Oct	2017	18/12/2017	NA	29	19	19	0	NA	130	42	0	178_1_7_19-Oct	0	0	0	1
178	1	7	top	NA	19	10	19-Oct	2017	18/12/2017	NA	29	15	15	0	NA	131	42	0	178_1_7_19-Oct	0	0	0	1
178	1	8	bottom	NA	19	10	19-Oct	2017	18/12/2017	NA	29	21	21	0	NA	132	42	0	178_1_8_19-Oct	0	0	0	1
178	1	8	top	NA	19	10	19-Oct	2017	18/12/2017	NA	29	22	22	0	NA	133	42	0	178_1_8_19-Oct	0	0	0	0.954545454545455
178	1	9	bottom	NA	19	10	19-Oct	2017	18/12/2017	NA	29	21	23	2	NA	134	42	0	178_1_9_19-Oct	0	0	0	1
178	1	9	top	NA	19	10	19-Oct	2017	18/12/2017	NA	29	13	15	2	NA	135	42	0	178_1_9_19-Oct	0	0	0	1
178	2	1	bottom	NA	19	10	19-Oct	2017	18/12/2017	NA	29	10	10	0	NA	140	42	0	178_2_1_19-Oct	0	0	0	0.5
178	2	1	top	NA	19	10	19-Oct	2017	18/12/2017	NA	29	13	13	0	NA	141	42	0	178_2_1_19-Oct	0	0	0	0.846153846153846
178	2	10	bottom	NA	19	10	19-Oct	2017	18/12/2017	NA	29	16	16	0	NA	156	42	0	178_2_10_19-Oct	0	0	0	1
178	2	10	top	NA	19	10	19-Oct	2017	18/12/2017	NA	29	22	22	0	NA	157	42	0	178_2_10_19-Oct	0	0	0	1
178	2	2	bottom	NA	19	10	19-Oct	2017	18/12/2017	NA	29	19	19	0	NA	158	42	0	178_2_2_19-Oct	0	0	0	1
178	2	2	top	NA	19	10	19-Oct	2017	18/12/2017	NA	29	20	20	0	NA	159	42	0	178_2_2_19-Oct	0	0	0	1
178	2	3	bottom	NA	19	10	19-Oct	2017	18/12/2017	NA	29	16	16	0	NA	142	42	0	178_2_3_19-Oct	0	0	0	0.5625
178	2	3	top	NA	19	10	19-Oct	2017	18/12/2017	NA	29	16	16	0	NA	143	42	0	178_2_3_19-Oct	0	0	0	0.6875
178	2	4	bottom	NA	19	10	19-Oct	2017	18/12/2017	NA	29	26	26	0	NA	144	42	0	178_2_4_19-Oct	0	0	0	0.923076923076923
178	2	4	top	NA	19	10	19-Oct	2017	18/12/2017	NA	29	16	16	0	NA	145	42	0	178_2_4_19-Oct	0	0	0	0.9375
178	2	5	bottom	NA	19	10	19-Oct	2017	18/12/2017	NA	29	20	20	0	NA	146	42	0	178_2_5_19-Oct	0	0	0	1
178	2	5	top	NA	19	10	19-Oct	2017	18/12/2017	NA	29	8	8	0	NA	147	42	0	178_2_5_19-Oct	0	0	0	1
178	2	6	bottom	NA	19	10	19-Oct	2017	18/12/2017	NA	29	19	19	0	NA	148	42	0	178_2_6_19-Oct	0	0	0	1
178	2	6	top	NA	19	10	19-Oct	2017	18/12/2017	NA	29	24	24	0	NA	149	42	0	178_2_6_19-Oct	0	0	0	1
178	2	7	bottom	NA	19	10	19-Oct	2017	18/12/2017	NA	29	20	20	0	NA	150	42	0	178_2_7_19-Oct	0	0	0	1
178	2	7	top	NA	19	10	19-Oct	2017	18/12/2017	NA	29	21	21	0	NA	151	42	0	178_2_7_19-Oct	0	0	0	1
178	2	8	bottom	NA	19	10	19-Oct	2017	18/12/2017	NA	29	15	15	0	NA	152	42	0	178_2_8_19-Oct	0	0	0	1
178	2	8	top	NA	19	10	19-Oct	2017	18/12/2017	NA	29	17	17	0	NA	153	42	0	178_2_8_19-Oct	0	0	0	1
178	2	9	bottom	NA	19	10	19-Oct	2017	18/12/2017	NA	29	18	18	0	NA	154	42	0	178_2_9_19-Oct	0	0	0	1
178	2	9	top	NA	19	10	19-Oct	2017	18/12/2017	NA	29	19	19	0	NA	155	42	0	178_2_9_19-Oct	0	0	0	1
178	1	1	bottom	NA	19	10	19-Oct	2017	18/12/2017	NA	29	15	19	4	NA	120	43	0	178_1_1_19-Oct	0	0	0	1
178	1	1	top	NA	19	10	19-Oct	2017	18/12/2017	NA	29	18	18	0	NA	121	43	0	178_1_1_19-Oct	0	0	0	1
178	1	10	bottom	NA	19	10	19-Oct	2017	18/12/2017	NA	29	23	23	0	NA	136	43	0	178_1_10_19-Oct	0	0	0	1
178	1	10	top	NA	19	10	19-Oct	2017	18/12/2017	NA	29	19	19	0	NA	137	43	0	178_1_10_19-Oct	0	0	0	1
178	1	2	bottom	NA	19	10	19-Oct	2017	18/12/2017	NA	29	16	19	3	NA	138	43	0	178_1_2_19-Oct	0	0	0	0.5625
178	1	2	top	NA	19	10	19-Oct	2017	18/12/2017	NA	29	10	12	2	NA	139	43	0	178_1_2_19-Oct	0	0	0	0.5
178	1	3	bottom	NA	19	10	19-Oct	2017	18/12/2017	NA	29	16	16	0	NA	122	43	0	178_1_3_19-Oct	0	0	0	1
178	1	3	top	NA	19	10	19-Oct	2017	18/12/2017	NA	29	8	8	0	NA	123	43	0	178_1_3_19-Oct	0	0	0	1
178	1	4	bottom	NA	19	10	19-Oct	2017	18/12/2017	NA	29	20	20	0	NA	124	43	0	178_1_4_19-Oct	0	0	0	1
178	1	4	top	NA	19	10	19-Oct	2017	18/12/2017	NA	29	7	7	0	NA	125	43	0	178_1_4_19-Oct	0	0	0	1
178	1	5	bottom	NA	19	10	19-Oct	2017	18/12/2017	NA	29	19	19	0	NA	126	43	0	178_1_5_19-Oct	0	0	0	1
178	1	5	top	NA	19	10	19-Oct	2017	18/12/2017	NA	29	14	14	0	NA	127	43	0	178_1_5_19-Oct	0	0	0	1
178	1	6	bottom	NA	19	10	19-Oct	2017	18/12/2017	NA	29	19	19	0	NA	128	43	0	178_1_6_19-Oct	0	0	0	0.947368421052632
178	1	6	top	NA	19	10	19-Oct	2017	18/12/2017	NA	29	10	10	0	NA	129	43	0	178_1_6_19-Oct	0	0	0	0.8
178	1	7	bottom	NA	19	10	19-Oct	2017	18/12/2017	NA	29	19	19	0	NA	130	43	0	178_1_7_19-Oct	0	0	0	1
178	1	7	top	NA	19	10	19-Oct	2017	18/12/2017	NA	29	15	15	0	NA	131	43	0	178_1_7_19-Oct	0	0	0	1
178	1	8	bottom	NA	19	10	19-Oct	2017	18/12/2017	NA	29	21	21	0	NA	132	43	0	178_1_8_19-Oct	0	0	0	1
178	1	8	top	NA	19	10	19-Oct	2017	18/12/2017	NA	29	22	22	0	NA	133	43	0	178_1_8_19-Oct	0	0	0	0.954545454545455
178	1	9	bottom	NA	19	10	19-Oct	2017	18/12/2017	NA	29	21	23	2	NA	134	43	0	178_1_9_19-Oct	0	0	0	1
178	1	9	top	NA	19	10	19-Oct	2017	18/12/2017	NA	29	13	15	2	NA	135	43	0	178_1_9_19-Oct	0	0	0	1
178	2	1	bottom	NA	19	10	19-Oct	2017	18/12/2017	NA	29	10	10	0	NA	140	43	1	178_2_1_19-Oct	10	10	0.1	0.6
178	2	1	top	NA	19	10	19-Oct	2017	18/12/2017	NA	29	13	13	0	NA	141	43	0	178_2_1_19-Oct	0	0	0	0.846153846153846
178	2	10	bottom	NA	19	10	19-Oct	2017	18/12/2017	NA	29	16	16	0	NA	156	43	0	178_2_10_19-Oct	0	0	0	1
178	2	10	top	NA	19	10	19-Oct	2017	18/12/2017	NA	29	22	22	0	NA	157	43	0	178_2_10_19-Oct	0	0	0	1
178	2	2	bottom	NA	19	10	19-Oct	2017	18/12/2017	NA	29	19	19	0	NA	158	43	0	178_2_2_19-Oct	0	0	0	1
178	2	2	top	NA	19	10	19-Oct	2017	18/12/2017	NA	29	20	20	0	NA	159	43	0	178_2_2_19-Oct	0	0	0	1
178	2	3	bottom	NA	19	10	19-Oct	2017	18/12/2017	NA	29	16	16	0	NA	142	43	0	178_2_3_19-Oct	0	0	0	0.5625
178	2	3	top	NA	19	10	19-Oct	2017	18/12/2017	NA	29	16	16	0	NA	143	43	0	178_2_3_19-Oct	0	0	0	0.6875
178	2	4	bottom	NA	19	10	19-Oct	2017	18/12/2017	NA	29	26	26	0	NA	144	43	0	178_2_4_19-Oct	0	0	0	0.923076923076923
178	2	4	top	NA	19	10	19-Oct	2017	18/12/2017	NA	29	16	16	0	NA	145	43	0	178_2_4_19-Oct	0	0	0	0.9375
178	2	5	bottom	NA	19	10	19-Oct	2017	18/12/2017	NA	29	20	20	0	NA	146	43	0	178_2_5_19-Oct	0	0	0	1
178	2	5	top	NA	19	10	19-Oct	2017	18/12/2017	NA	29	8	8	0	NA	147	43	0	178_2_5_19-Oct	0	0	0	1
178	2	6	bottom	NA	19	10	19-Oct	2017	18/12/2017	NA	29	19	19	0	NA	148	43	0	178_2_6_19-Oct	0	0	0	1
178	2	6	top	NA	19	10	19-Oct	2017	18/12/2017	NA	29	24	24	0	NA	149	43	0	178_2_6_19-Oct	0	0	0	1
178	2	7	bottom	NA	19	10	19-Oct	2017	18/12/2017	NA	29	20	20	0	NA	150	43	0	178_2_7_19-Oct	0	0	0	1
178	2	7	top	NA	19	10	19-Oct	2017	18/12/2017	NA	29	21	21	0	NA	151	43	0	178_2_7_19-Oct	0	0	0	1
178	2	8	bottom	NA	19	10	19-Oct	2017	18/12/2017	NA	29	15	15	0	NA	152	43	0	178_2_8_19-Oct	0	0	0	1
178	2	8	top	NA	19	10	19-Oct	2017	18/12/2017	NA	29	17	17	0	NA	153	43	0	178_2_8_19-Oct	0	0	0	1
178	2	9	bottom	NA	19	10	19-Oct	2017	18/12/2017	NA	29	18	18	0	NA	154	43	0	178_2_9_19-Oct	0	0	0	1
178	2	9	top	NA	19	10	19-Oct	2017	18/12/2017	NA	29	19	19	0	NA	155	43	0	178_2_9_19-Oct	0	0	0	1
178	1	1	bottom	NA	19	10	19-Oct	2017	18/12/2017	NA	29	15	19	4	NA	120	44	0	178_1_1_19-Oct	0	0	0	1
178	1	1	top	NA	19	10	19-Oct	2017	18/12/2017	NA	29	18	18	0	NA	121	44	0	178_1_1_19-Oct	0	0	0	1
178	1	10	bottom	NA	19	10	19-Oct	2017	18/12/2017	NA	29	23	23	0	NA	136	44	0	178_1_10_19-Oct	0	0	0	1
178	1	10	top	NA	19	10	19-Oct	2017	18/12/2017	NA	29	19	19	0	NA	137	44	0	178_1_10_19-Oct	0	0	0	1
178	1	2	bottom	NA	19	10	19-Oct	2017	18/12/2017	NA	29	16	19	3	NA	138	44	0	178_1_2_19-Oct	0	0	0	0.5625
178	1	2	top	NA	19	10	19-Oct	2017	18/12/2017	NA	29	10	12	2	NA	139	44	0	178_1_2_19-Oct	0	0	0	0.5
178	1	3	bottom	NA	19	10	19-Oct	2017	18/12/2017	NA	29	16	16	0	NA	122	44	0	178_1_3_19-Oct	0	0	0	1
178	1	3	top	NA	19	10	19-Oct	2017	18/12/2017	NA	29	8	8	0	NA	123	44	0	178_1_3_19-Oct	0	0	0	1
178	1	4	bottom	NA	19	10	19-Oct	2017	18/12/2017	NA	29	20	20	0	NA	124	44	0	178_1_4_19-Oct	0	0	0	1
178	1	4	top	NA	19	10	19-Oct	2017	18/12/2017	NA	29	7	7	0	NA	125	44	0	178_1_4_19-Oct	0	0	0	1
178	1	5	bottom	NA	19	10	19-Oct	2017	18/12/2017	NA	29	19	19	0	NA	126	44	0	178_1_5_19-Oct	0	0	0	1
178	1	5	top	NA	19	10	19-Oct	2017	18/12/2017	NA	29	14	14	0	NA	127	44	0	178_1_5_19-Oct	0	0	0	1
178	1	6	bottom	NA	19	10	19-Oct	2017	18/12/2017	NA	29	19	19	0	NA	128	44	0	178_1_6_19-Oct	0	0	0	0.947368421052632
178	1	6	top	NA	19	10	19-Oct	2017	18/12/2017	NA	29	10	10	0	NA	129	44	0	178_1_6_19-Oct	0	0	0	0.8
178	1	7	bottom	NA	19	10	19-Oct	2017	18/12/2017	NA	29	19	19	0	NA	130	44	0	178_1_7_19-Oct	0	0	0	1
178	1	7	top	NA	19	10	19-Oct	2017	18/12/2017	NA	29	15	15	0	NA	131	44	0	178_1_7_19-Oct	0	0	0	1
178	1	8	bottom	NA	19	10	19-Oct	2017	18/12/2017	NA	29	21	21	0	NA	132	44	0	178_1_8_19-Oct	0	0	0	1
178	1	8	top	NA	19	10	19-Oct	2017	18/12/2017	NA	29	22	22	0	NA	133	44	0	178_1_8_19-Oct	0	0	0	0.954545454545455
178	1	9	bottom	NA	19	10	19-Oct	2017	18/12/2017	NA	29	21	23	2	NA	134	44	0	178_1_9_19-Oct	0	0	0	1
178	1	9	top	NA	19	10	19-Oct	2017	18/12/2017	NA	29	13	15	2	NA	135	44	0	178_1_9_19-Oct	0	0	0	1
178	2	1	bottom	NA	19	10	19-Oct	2017	18/12/2017	NA	29	10	10	0	NA	140	44	1	178_2_1_19-Oct	10	10	0.1	0.7
178	2	1	top	NA	19	10	19-Oct	2017	18/12/2017	NA	29	13	13	0	NA	141	44	0	178_2_1_19-Oct	0	0	0	0.846153846153846
178	2	10	bottom	NA	19	10	19-Oct	2017	18/12/2017	NA	29	16	16	0	NA	156	44	0	178_2_10_19-Oct	0	0	0	1
178	2	10	top	NA	19	10	19-Oct	2017	18/12/2017	NA	29	22	22	0	NA	157	44	0	178_2_10_19-Oct	0	0	0	1
178	2	2	bottom	NA	19	10	19-Oct	2017	18/12/2017	NA	29	19	19	0	NA	158	44	0	178_2_2_19-Oct	0	0	0	1
178	2	2	top	NA	19	10	19-Oct	2017	18/12/2017	NA	29	20	20	0	NA	159	44	0	178_2_2_19-Oct	0	0	0	1
178	2	3	bottom	NA	19	10	19-Oct	2017	18/12/2017	NA	29	16	16	0	NA	142	44	0	178_2_3_19-Oct	0	0	0	0.5625
178	2	3	top	NA	19	10	19-Oct	2017	18/12/2017	NA	29	16	16	0	NA	143	44	0	178_2_3_19-Oct	0	0	0	0.6875
178	2	4	bottom	NA	19	10	19-Oct	2017	18/12/2017	NA	29	26	26	0	NA	144	44	0	178_2_4_19-Oct	0	0	0	0.923076923076923
178	2	4	top	NA	19	10	19-Oct	2017	18/12/2017	NA	29	16	16	0	NA	145	44	0	178_2_4_19-Oct	0	0	0	0.9375
178	2	5	bottom	NA	19	10	19-Oct	2017	18/12/2017	NA	29	20	20	0	NA	146	44	0	178_2_5_19-Oct	0	0	0	1
178	2	5	top	NA	19	10	19-Oct	2017	18/12/2017	NA	29	8	8	0	NA	147	44	0	178_2_5_19-Oct	0	0	0	1
178	2	6	bottom	NA	19	10	19-Oct	2017	18/12/2017	NA	29	19	19	0	NA	148	44	0	178_2_6_19-Oct	0	0	0	1
178	2	6	top	NA	19	10	19-Oct	2017	18/12/2017	NA	29	24	24	0	NA	149	44	0	178_2_6_19-Oct	0	0	0	1
178	2	7	bottom	NA	19	10	19-Oct	2017	18/12/2017	NA	29	20	20	0	NA	150	44	0	178_2_7_19-Oct	0	0	0	1
178	2	7	top	NA	19	10	19-Oct	2017	18/12/2017	NA	29	21	21	0	NA	151	44	0	178_2_7_19-Oct	0	0	0	1
178	2	8	bottom	NA	19	10	19-Oct	2017	18/12/2017	NA	29	15	15	0	NA	152	44	0	178_2_8_19-Oct	0	0	0	1
178	2	8	top	NA	19	10	19-Oct	2017	18/12/2017	NA	29	17	17	0	NA	153	44	0	178_2_8_19-Oct	0	0	0	1
178	2	9	bottom	NA	19	10	19-Oct	2017	18/12/2017	NA	29	18	18	0	NA	154	44	0	178_2_9_19-Oct	0	0	0	1
178	2	9	top	NA	19	10	19-Oct	2017	18/12/2017	NA	29	19	19	0	NA	155	44	0	178_2_9_19-Oct	0	0	0	1
178	1	1	bottom	NA	19	10	19-Oct	2017	18/12/2017	NA	29	15	19	4	NA	120	45	0	178_1_1_19-Oct	0	0	0	1
178	1	1	top	NA	19	10	19-Oct	2017	18/12/2017	NA	29	18	18	0	NA	121	45	0	178_1_1_19-Oct	0	0	0	1
178	1	10	bottom	NA	19	10	19-Oct	2017	18/12/2017	NA	29	23	23	0	NA	136	45	0	178_1_10_19-Oct	0	0	0	1
178	1	10	top	NA	19	10	19-Oct	2017	18/12/2017	NA	29	19	19	0	NA	137	45	0	178_1_10_19-Oct	0	0	0	1
178	1	2	bottom	NA	19	10	19-Oct	2017	18/12/2017	NA	29	16	19	3	NA	138	45	1	178_1_2_19-Oct	5.26315789473684	6.25	0.0625	0.625
178	1	2	top	NA	19	10	19-Oct	2017	18/12/2017	NA	29	10	12	2	NA	139	45	1	178_1_2_19-Oct	8.33333333333333	10	0.1	0.6
178	1	3	bottom	NA	19	10	19-Oct	2017	18/12/2017	NA	29	16	16	0	NA	122	45	0	178_1_3_19-Oct	0	0	0	1
178	1	3	top	NA	19	10	19-Oct	2017	18/12/2017	NA	29	8	8	0	NA	123	45	0	178_1_3_19-Oct	0	0	0	1
178	1	4	bottom	NA	19	10	19-Oct	2017	18/12/2017	NA	29	20	20	0	NA	124	45	0	178_1_4_19-Oct	0	0	0	1
178	1	4	top	NA	19	10	19-Oct	2017	18/12/2017	NA	29	7	7	0	NA	125	45	0	178_1_4_19-Oct	0	0	0	1
178	1	5	bottom	NA	19	10	19-Oct	2017	18/12/2017	NA	29	19	19	0	NA	126	45	0	178_1_5_19-Oct	0	0	0	1
178	1	5	top	NA	19	10	19-Oct	2017	18/12/2017	NA	29	14	14	0	NA	127	45	0	178_1_5_19-Oct	0	0	0	1
178	1	6	bottom	NA	19	10	19-Oct	2017	18/12/2017	NA	29	19	19	0	NA	128	45	0	178_1_6_19-Oct	0	0	0	0.947368421052632
178	1	6	top	NA	19	10	19-Oct	2017	18/12/2017	NA	29	10	10	0	NA	129	45	0	178_1_6_19-Oct	0	0	0	0.8
178	1	7	bottom	NA	19	10	19-Oct	2017	18/12/2017	NA	29	19	19	0	NA	130	45	0	178_1_7_19-Oct	0	0	0	1
178	1	7	top	NA	19	10	19-Oct	2017	18/12/2017	NA	29	15	15	0	NA	131	45	0	178_1_7_19-Oct	0	0	0	1
178	1	8	bottom	NA	19	10	19-Oct	2017	18/12/2017	NA	29	21	21	0	NA	132	45	0	178_1_8_19-Oct	0	0	0	1
178	1	8	top	NA	19	10	19-Oct	2017	18/12/2017	NA	29	22	22	0	NA	133	45	1	178_1_8_19-Oct	4.54545454545455	4.54545454545455	0.0454545454545455	1
178	1	9	bottom	NA	19	10	19-Oct	2017	18/12/2017	NA	29	21	23	2	NA	134	45	0	178_1_9_19-Oct	0	0	0	1
178	1	9	top	NA	19	10	19-Oct	2017	18/12/2017	NA	29	13	15	2	NA	135	45	0	178_1_9_19-Oct	0	0	0	1
178	2	1	bottom	NA	19	10	19-Oct	2017	18/12/2017	NA	29	10	10	0	NA	140	45	0	178_2_1_19-Oct	0	0	0	0.7
178	2	1	top	NA	19	10	19-Oct	2017	18/12/2017	NA	29	13	13	0	NA	141	45	0	178_2_1_19-Oct	0	0	0	0.846153846153846
178	2	10	bottom	NA	19	10	19-Oct	2017	18/12/2017	NA	29	16	16	0	NA	156	45	0	178_2_10_19-Oct	0	0	0	1
178	2	10	top	NA	19	10	19-Oct	2017	18/12/2017	NA	29	22	22	0	NA	157	45	0	178_2_10_19-Oct	0	0	0	1
178	2	2	bottom	NA	19	10	19-Oct	2017	18/12/2017	NA	29	19	19	0	NA	158	45	0	178_2_2_19-Oct	0	0	0	1
178	2	2	top	NA	19	10	19-Oct	2017	18/12/2017	NA	29	20	20	0	NA	159	45	0	178_2_2_19-Oct	0	0	0	1
178	2	3	bottom	NA	19	10	19-Oct	2017	18/12/2017	NA	29	16	16	0	NA	142	45	3	178_2_3_19-Oct	18.75	18.75	0.1875	0.75
178	2	3	top	NA	19	10	19-Oct	2017	18/12/2017	NA	29	16	16	0	NA	143	45	1	178_2_3_19-Oct	6.25	6.25	0.0625	0.75
178	2	4	bottom	NA	19	10	19-Oct	2017	18/12/2017	NA	29	26	26	0	NA	144	45	1	178_2_4_19-Oct	3.84615384615385	3.84615384615385	0.0384615384615385	0.961538461538462
178	2	4	top	NA	19	10	19-Oct	2017	18/12/2017	NA	29	16	16	0	NA	145	45	0	178_2_4_19-Oct	0	0	0	0.9375
178	2	5	bottom	NA	19	10	19-Oct	2017	18/12/2017	NA	29	20	20	0	NA	146	45	0	178_2_5_19-Oct	0	0	0	1
178	2	5	top	NA	19	10	19-Oct	2017	18/12/2017	NA	29	8	8	0	NA	147	45	0	178_2_5_19-Oct	0	0	0	1
178	2	6	bottom	NA	19	10	19-Oct	2017	18/12/2017	NA	29	19	19	0	NA	148	45	0	178_2_6_19-Oct	0	0	0	1
178	2	6	top	NA	19	10	19-Oct	2017	18/12/2017	NA	29	24	24	0	NA	149	45	0	178_2_6_19-Oct	0	0	0	1
178	2	7	bottom	NA	19	10	19-Oct	2017	18/12/2017	NA	29	20	20	0	NA	150	45	0	178_2_7_19-Oct	0	0	0	1
178	2	7	top	NA	19	10	19-Oct	2017	18/12/2017	NA	29	21	21	0	NA	151	45	0	178_2_7_19-Oct	0	0	0	1
178	2	8	bottom	NA	19	10	19-Oct	2017	18/12/2017	NA	29	15	15	0	NA	152	45	0	178_2_8_19-Oct	0	0	0	1
178	2	8	top	NA	19	10	19-Oct	2017	18/12/2017	NA	29	17	17	0	NA	153	45	0	178_2_8_19-Oct	0	0	0	1
178	2	9	bottom	NA	19	10	19-Oct	2017	18/12/2017	NA	29	18	18	0	NA	154	45	0	178_2_9_19-Oct	0	0	0	1
178	2	9	top	NA	19	10	19-Oct	2017	18/12/2017	NA	29	19	19	0	NA	155	45	0	178_2_9_19-Oct	0	0	0	1
178	1	1	bottom	NA	19	10	19-Oct	2017	18/12/2017	NA	29	15	19	4	NA	120	46	0	178_1_1_19-Oct	0	0	0	1
178	1	1	top	NA	19	10	19-Oct	2017	18/12/2017	NA	29	18	18	0	NA	121	46	0	178_1_1_19-Oct	0	0	0	1
178	1	10	bottom	NA	19	10	19-Oct	2017	18/12/2017	NA	29	23	23	0	NA	136	46	0	178_1_10_19-Oct	0	0	0	1
178	1	10	top	NA	19	10	19-Oct	2017	18/12/2017	NA	29	19	19	0	NA	137	46	0	178_1_10_19-Oct	0	0	0	1
178	1	2	bottom	NA	19	10	19-Oct	2017	18/12/2017	NA	29	16	19	3	NA	138	46	1	178_1_2_19-Oct	5.26315789473684	6.25	0.0625	0.6875
178	1	2	top	NA	19	10	19-Oct	2017	18/12/2017	NA	29	10	12	2	NA	139	46	0	178_1_2_19-Oct	0	0	0	0.6
178	1	3	bottom	NA	19	10	19-Oct	2017	18/12/2017	NA	29	16	16	0	NA	122	46	0	178_1_3_19-Oct	0	0	0	1
178	1	3	top	NA	19	10	19-Oct	2017	18/12/2017	NA	29	8	8	0	NA	123	46	0	178_1_3_19-Oct	0	0	0	1
178	1	4	bottom	NA	19	10	19-Oct	2017	18/12/2017	NA	29	20	20	0	NA	124	46	0	178_1_4_19-Oct	0	0	0	1
178	1	4	top	NA	19	10	19-Oct	2017	18/12/2017	NA	29	7	7	0	NA	125	46	0	178_1_4_19-Oct	0	0	0	1
178	1	5	bottom	NA	19	10	19-Oct	2017	18/12/2017	NA	29	19	19	0	NA	126	46	0	178_1_5_19-Oct	0	0	0	1
178	1	5	top	NA	19	10	19-Oct	2017	18/12/2017	NA	29	14	14	0	NA	127	46	0	178_1_5_19-Oct	0	0	0	1
178	1	6	bottom	NA	19	10	19-Oct	2017	18/12/2017	NA	29	19	19	0	NA	128	46	0	178_1_6_19-Oct	0	0	0	0.947368421052632
178	1	6	top	NA	19	10	19-Oct	2017	18/12/2017	NA	29	10	10	0	NA	129	46	0	178_1_6_19-Oct	0	0	0	0.8
178	1	7	bottom	NA	19	10	19-Oct	2017	18/12/2017	NA	29	19	19	0	NA	130	46	0	178_1_7_19-Oct	0	0	0	1
178	1	7	top	NA	19	10	19-Oct	2017	18/12/2017	NA	29	15	15	0	NA	131	46	0	178_1_7_19-Oct	0	0	0	1
178	1	8	bottom	NA	19	10	19-Oct	2017	18/12/2017	NA	29	21	21	0	NA	132	46	0	178_1_8_19-Oct	0	0	0	1
178	1	8	top	NA	19	10	19-Oct	2017	18/12/2017	NA	29	22	22	0	NA	133	46	0	178_1_8_19-Oct	0	0	0	1
178	1	9	bottom	NA	19	10	19-Oct	2017	18/12/2017	NA	29	21	23	2	NA	134	46	0	178_1_9_19-Oct	0	0	0	1
178	1	9	top	NA	19	10	19-Oct	2017	18/12/2017	NA	29	13	15	2	NA	135	46	0	178_1_9_19-Oct	0	0	0	1
178	2	1	bottom	NA	19	10	19-Oct	2017	18/12/2017	NA	29	10	10	0	NA	140	46	0	178_2_1_19-Oct	0	0	0	0.7
178	2	1	top	NA	19	10	19-Oct	2017	18/12/2017	NA	29	13	13	0	NA	141	46	0	178_2_1_19-Oct	0	0	0	0.846153846153846
178	2	10	bottom	NA	19	10	19-Oct	2017	18/12/2017	NA	29	16	16	0	NA	156	46	0	178_2_10_19-Oct	0	0	0	1
178	2	10	top	NA	19	10	19-Oct	2017	18/12/2017	NA	29	22	22	0	NA	157	46	0	178_2_10_19-Oct	0	0	0	1
178	2	2	bottom	NA	19	10	19-Oct	2017	18/12/2017	NA	29	19	19	0	NA	158	46	0	178_2_2_19-Oct	0	0	0	1
178	2	2	top	NA	19	10	19-Oct	2017	18/12/2017	NA	29	20	20	0	NA	159	46	0	178_2_2_19-Oct	0	0	0	1
178	2	3	bottom	NA	19	10	19-Oct	2017	18/12/2017	NA	29	16	16	0	NA	142	46	1	178_2_3_19-Oct	6.25	6.25	0.0625	0.8125
178	2	3	top	NA	19	10	19-Oct	2017	18/12/2017	NA	29	16	16	0	NA	143	46	2	178_2_3_19-Oct	12.5	12.5	0.125	0.875
178	2	4	bottom	NA	19	10	19-Oct	2017	18/12/2017	NA	29	26	26	0	NA	144	46	0	178_2_4_19-Oct	0	0	0	0.961538461538462
178	2	4	top	NA	19	10	19-Oct	2017	18/12/2017	NA	29	16	16	0	NA	145	46	0	178_2_4_19-Oct	0	0	0	0.9375
178	2	5	bottom	NA	19	10	19-Oct	2017	18/12/2017	NA	29	20	20	0	NA	146	46	0	178_2_5_19-Oct	0	0	0	1
178	2	5	top	NA	19	10	19-Oct	2017	18/12/2017	NA	29	8	8	0	NA	147	46	0	178_2_5_19-Oct	0	0	0	1
178	2	6	bottom	NA	19	10	19-Oct	2017	18/12/2017	NA	29	19	19	0	NA	148	46	0	178_2_6_19-Oct	0	0	0	1
178	2	6	top	NA	19	10	19-Oct	2017	18/12/2017	NA	29	24	24	0	NA	149	46	0	178_2_6_19-Oct	0	0	0	1
178	2	7	bottom	NA	19	10	19-Oct	2017	18/12/2017	NA	29	20	20	0	NA	150	46	0	178_2_7_19-Oct	0	0	0	1
178	2	7	top	NA	19	10	19-Oct	2017	18/12/2017	NA	29	21	21	0	NA	151	46	0	178_2_7_19-Oct	0	0	0	1
178	2	8	bottom	NA	19	10	19-Oct	2017	18/12/2017	NA	29	15	15	0	NA	152	46	0	178_2_8_19-Oct	0	0	0	1
178	2	8	top	NA	19	10	19-Oct	2017	18/12/2017	NA	29	17	17	0	NA	153	46	0	178_2_8_19-Oct	0	0	0	1
178	2	9	bottom	NA	19	10	19-Oct	2017	18/12/2017	NA	29	18	18	0	NA	154	46	0	178_2_9_19-Oct	0	0	0	1
178	2	9	top	NA	19	10	19-Oct	2017	18/12/2017	NA	29	19	19	0	NA	155	46	0	178_2_9_19-Oct	0	0	0	1
178	1	1	bottom	NA	19	10	19-Oct	2017	18/12/2017	NA	29	15	19	4	NA	120	47	0	178_1_1_19-Oct	0	0	0	1
178	1	1	top	NA	19	10	19-Oct	2017	18/12/2017	NA	29	18	18	0	NA	121	47	0	178_1_1_19-Oct	0	0	0	1
178	1	10	bottom	NA	19	10	19-Oct	2017	18/12/2017	NA	29	23	23	0	NA	136	47	0	178_1_10_19-Oct	0	0	0	1
178	1	10	top	NA	19	10	19-Oct	2017	18/12/2017	NA	29	19	19	0	NA	137	47	0	178_1_10_19-Oct	0	0	0	1
178	1	2	bottom	NA	19	10	19-Oct	2017	18/12/2017	NA	29	16	19	3	NA	138	47	0	178_1_2_19-Oct	0	0	0	0.6875
178	1	2	top	NA	19	10	19-Oct	2017	18/12/2017	NA	29	10	12	2	NA	139	47	0	178_1_2_19-Oct	0	0	0	0.6
178	1	3	bottom	NA	19	10	19-Oct	2017	18/12/2017	NA	29	16	16	0	NA	122	47	0	178_1_3_19-Oct	0	0	0	1
178	1	3	top	NA	19	10	19-Oct	2017	18/12/2017	NA	29	8	8	0	NA	123	47	0	178_1_3_19-Oct	0	0	0	1
178	1	4	bottom	NA	19	10	19-Oct	2017	18/12/2017	NA	29	20	20	0	NA	124	47	0	178_1_4_19-Oct	0	0	0	1
178	1	4	top	NA	19	10	19-Oct	2017	18/12/2017	NA	29	7	7	0	NA	125	47	0	178_1_4_19-Oct	0	0	0	1
178	1	5	bottom	NA	19	10	19-Oct	2017	18/12/2017	NA	29	19	19	0	NA	126	47	0	178_1_5_19-Oct	0	0	0	1
178	1	5	top	NA	19	10	19-Oct	2017	18/12/2017	NA	29	14	14	0	NA	127	47	0	178_1_5_19-Oct	0	0	0	1
178	1	6	bottom	NA	19	10	19-Oct	2017	18/12/2017	NA	29	19	19	0	NA	128	47	0	178_1_6_19-Oct	0	0	0	0.947368421052632
178	1	6	top	NA	19	10	19-Oct	2017	18/12/2017	NA	29	10	10	0	NA	129	47	0	178_1_6_19-Oct	0	0	0	0.8
178	1	7	bottom	NA	19	10	19-Oct	2017	18/12/2017	NA	29	19	19	0	NA	130	47	0	178_1_7_19-Oct	0	0	0	1
178	1	7	top	NA	19	10	19-Oct	2017	18/12/2017	NA	29	15	15	0	NA	131	47	0	178_1_7_19-Oct	0	0	0	1
178	1	8	bottom	NA	19	10	19-Oct	2017	18/12/2017	NA	29	21	21	0	NA	132	47	0	178_1_8_19-Oct	0	0	0	1
178	1	8	top	NA	19	10	19-Oct	2017	18/12/2017	NA	29	22	22	0	NA	133	47	0	178_1_8_19-Oct	0	0	0	1
178	1	9	bottom	NA	19	10	19-Oct	2017	18/12/2017	NA	29	21	23	2	NA	134	47	0	178_1_9_19-Oct	0	0	0	1
178	1	9	top	NA	19	10	19-Oct	2017	18/12/2017	NA	29	13	15	2	NA	135	47	0	178_1_9_19-Oct	0	0	0	1
178	2	1	bottom	NA	19	10	19-Oct	2017	18/12/2017	NA	29	10	10	0	NA	140	47	2	178_2_1_19-Oct	20	20	0.2	0.9
178	2	1	top	NA	19	10	19-Oct	2017	18/12/2017	NA	29	13	13	0	NA	141	47	0	178_2_1_19-Oct	0	0	0	0.846153846153846
178	2	10	bottom	NA	19	10	19-Oct	2017	18/12/2017	NA	29	16	16	0	NA	156	47	0	178_2_10_19-Oct	0	0	0	1
178	2	10	top	NA	19	10	19-Oct	2017	18/12/2017	NA	29	22	22	0	NA	157	47	0	178_2_10_19-Oct	0	0	0	1
178	2	2	bottom	NA	19	10	19-Oct	2017	18/12/2017	NA	29	19	19	0	NA	158	47	0	178_2_2_19-Oct	0	0	0	1
178	2	2	top	NA	19	10	19-Oct	2017	18/12/2017	NA	29	20	20	0	NA	159	47	0	178_2_2_19-Oct	0	0	0	1
178	2	3	bottom	NA	19	10	19-Oct	2017	18/12/2017	NA	29	16	16	0	NA	142	47	1	178_2_3_19-Oct	6.25	6.25	0.0625	0.875
178	2	3	top	NA	19	10	19-Oct	2017	18/12/2017	NA	29	16	16	0	NA	143	47	1	178_2_3_19-Oct	6.25	6.25	0.0625	0.9375
178	2	4	bottom	NA	19	10	19-Oct	2017	18/12/2017	NA	29	26	26	0	NA	144	47	1	178_2_4_19-Oct	3.84615384615385	3.84615384615385	0.0384615384615385	1
178	2	4	top	NA	19	10	19-Oct	2017	18/12/2017	NA	29	16	16	0	NA	145	47	0	178_2_4_19-Oct	0	0	0	0.9375
178	2	5	bottom	NA	19	10	19-Oct	2017	18/12/2017	NA	29	20	20	0	NA	146	47	0	178_2_5_19-Oct	0	0	0	1
178	2	5	top	NA	19	10	19-Oct	2017	18/12/2017	NA	29	8	8	0	NA	147	47	0	178_2_5_19-Oct	0	0	0	1
178	2	6	bottom	NA	19	10	19-Oct	2017	18/12/2017	NA	29	19	19	0	NA	148	47	0	178_2_6_19-Oct	0	0	0	1
178	2	6	top	NA	19	10	19-Oct	2017	18/12/2017	NA	29	24	24	0	NA	149	47	0	178_2_6_19-Oct	0	0	0	1
178	2	7	bottom	NA	19	10	19-Oct	2017	18/12/2017	NA	29	20	20	0	NA	150	47	0	178_2_7_19-Oct	0	0	0	1
178	2	7	top	NA	19	10	19-Oct	2017	18/12/2017	NA	29	21	21	0	NA	151	47	0	178_2_7_19-Oct	0	0	0	1
178	2	8	bottom	NA	19	10	19-Oct	2017	18/12/2017	NA	29	15	15	0	NA	152	47	0	178_2_8_19-Oct	0	0	0	1
178	2	8	top	NA	19	10	19-Oct	2017	18/12/2017	NA	29	17	17	0	NA	153	47	0	178_2_8_19-Oct	0	0	0	1
178	2	9	bottom	NA	19	10	19-Oct	2017	18/12/2017	NA	29	18	18	0	NA	154	47	0	178_2_9_19-Oct	0	0	0	1
178	2	9	top	NA	19	10	19-Oct	2017	18/12/2017	NA	29	19	19	0	NA	155	47	0	178_2_9_19-Oct	0	0	0	1
178	1	1	bottom	NA	19	10	19-Oct	2017	18/12/2017	NA	29	15	19	4	NA	120	48	0	178_1_1_19-Oct	0	0	0	1
178	1	1	top	NA	19	10	19-Oct	2017	18/12/2017	NA	29	18	18	0	NA	121	48	0	178_1_1_19-Oct	0	0	0	1
178	1	10	bottom	NA	19	10	19-Oct	2017	18/12/2017	NA	29	23	23	0	NA	136	48	0	178_1_10_19-Oct	0	0	0	1
178	1	10	top	NA	19	10	19-Oct	2017	18/12/2017	NA	29	19	19	0	NA	137	48	0	178_1_10_19-Oct	0	0	0	1
178	1	2	bottom	NA	19	10	19-Oct	2017	18/12/2017	NA	29	16	19	3	NA	138	48	0	178_1_2_19-Oct	0	0	0	0.6875
178	1	2	top	NA	19	10	19-Oct	2017	18/12/2017	NA	29	10	12	2	NA	139	48	1	178_1_2_19-Oct	8.33333333333333	10	0.1	0.7
178	1	3	bottom	NA	19	10	19-Oct	2017	18/12/2017	NA	29	16	16	0	NA	122	48	0	178_1_3_19-Oct	0	0	0	1
178	1	3	top	NA	19	10	19-Oct	2017	18/12/2017	NA	29	8	8	0	NA	123	48	0	178_1_3_19-Oct	0	0	0	1
178	1	4	bottom	NA	19	10	19-Oct	2017	18/12/2017	NA	29	20	20	0	NA	124	48	0	178_1_4_19-Oct	0	0	0	1
178	1	4	top	NA	19	10	19-Oct	2017	18/12/2017	NA	29	7	7	0	NA	125	48	0	178_1_4_19-Oct	0	0	0	1
178	1	5	bottom	NA	19	10	19-Oct	2017	18/12/2017	NA	29	19	19	0	NA	126	48	0	178_1_5_19-Oct	0	0	0	1
178	1	5	top	NA	19	10	19-Oct	2017	18/12/2017	NA	29	14	14	0	NA	127	48	0	178_1_5_19-Oct	0	0	0	1
178	1	6	bottom	NA	19	10	19-Oct	2017	18/12/2017	NA	29	19	19	0	NA	128	48	0	178_1_6_19-Oct	0	0	0	0.947368421052632
178	1	6	top	NA	19	10	19-Oct	2017	18/12/2017	NA	29	10	10	0	NA	129	48	0	178_1_6_19-Oct	0	0	0	0.8
178	1	7	bottom	NA	19	10	19-Oct	2017	18/12/2017	NA	29	19	19	0	NA	130	48	0	178_1_7_19-Oct	0	0	0	1
178	1	7	top	NA	19	10	19-Oct	2017	18/12/2017	NA	29	15	15	0	NA	131	48	0	178_1_7_19-Oct	0	0	0	1
178	1	8	bottom	NA	19	10	19-Oct	2017	18/12/2017	NA	29	21	21	0	NA	132	48	0	178_1_8_19-Oct	0	0	0	1
178	1	8	top	NA	19	10	19-Oct	2017	18/12/2017	NA	29	22	22	0	NA	133	48	0	178_1_8_19-Oct	0	0	0	1
178	1	9	bottom	NA	19	10	19-Oct	2017	18/12/2017	NA	29	21	23	2	NA	134	48	0	178_1_9_19-Oct	0	0	0	1
178	1	9	top	NA	19	10	19-Oct	2017	18/12/2017	NA	29	13	15	2	NA	135	48	0	178_1_9_19-Oct	0	0	0	1
178	2	1	bottom	NA	19	10	19-Oct	2017	18/12/2017	NA	29	10	10	0	NA	140	48	0	178_2_1_19-Oct	0	0	0	0.9
178	2	1	top	NA	19	10	19-Oct	2017	18/12/2017	NA	29	13	13	0	NA	141	48	2	178_2_1_19-Oct	15.3846153846154	15.3846153846154	0.153846153846154	1
178	2	10	bottom	NA	19	10	19-Oct	2017	18/12/2017	NA	29	16	16	0	NA	156	48	0	178_2_10_19-Oct	0	0	0	1
178	2	10	top	NA	19	10	19-Oct	2017	18/12/2017	NA	29	22	22	0	NA	157	48	0	178_2_10_19-Oct	0	0	0	1
178	2	2	bottom	NA	19	10	19-Oct	2017	18/12/2017	NA	29	19	19	0	NA	158	48	0	178_2_2_19-Oct	0	0	0	1
178	2	2	top	NA	19	10	19-Oct	2017	18/12/2017	NA	29	20	20	0	NA	159	48	0	178_2_2_19-Oct	0	0	0	1
178	2	3	bottom	NA	19	10	19-Oct	2017	18/12/2017	NA	29	16	16	0	NA	142	48	2	178_2_3_19-Oct	12.5	12.5	0.125	1
178	2	3	top	NA	19	10	19-Oct	2017	18/12/2017	NA	29	16	16	0	NA	143	48	0	178_2_3_19-Oct	0	0	0	0.9375
178	2	4	bottom	NA	19	10	19-Oct	2017	18/12/2017	NA	29	26	26	0	NA	144	48	0	178_2_4_19-Oct	0	0	0	1
178	2	4	top	NA	19	10	19-Oct	2017	18/12/2017	NA	29	16	16	0	NA	145	48	0	178_2_4_19-Oct	0	0	0	0.9375
178	2	5	bottom	NA	19	10	19-Oct	2017	18/12/2017	NA	29	20	20	0	NA	146	48	0	178_2_5_19-Oct	0	0	0	1
178	2	5	top	NA	19	10	19-Oct	2017	18/12/2017	NA	29	8	8	0	NA	147	48	0	178_2_5_19-Oct	0	0	0	1
178	2	6	bottom	NA	19	10	19-Oct	2017	18/12/2017	NA	29	19	19	0	NA	148	48	0	178_2_6_19-Oct	0	0	0	1
178	2	6	top	NA	19	10	19-Oct	2017	18/12/2017	NA	29	24	24	0	NA	149	48	0	178_2_6_19-Oct	0	0	0	1
178	2	7	bottom	NA	19	10	19-Oct	2017	18/12/2017	NA	29	20	20	0	NA	150	48	0	178_2_7_19-Oct	0	0	0	1
178	2	7	top	NA	19	10	19-Oct	2017	18/12/2017	NA	29	21	21	0	NA	151	48	0	178_2_7_19-Oct	0	0	0	1
178	2	8	bottom	NA	19	10	19-Oct	2017	18/12/2017	NA	29	15	15	0	NA	152	48	0	178_2_8_19-Oct	0	0	0	1
178	2	8	top	NA	19	10	19-Oct	2017	18/12/2017	NA	29	17	17	0	NA	153	48	0	178_2_8_19-Oct	0	0	0	1
178	2	9	bottom	NA	19	10	19-Oct	2017	18/12/2017	NA	29	18	18	0	NA	154	48	0	178_2_9_19-Oct	0	0	0	1
178	2	9	top	NA	19	10	19-Oct	2017	18/12/2017	NA	29	19	19	0	NA	155	48	0	178_2_9_19-Oct	0	0	0	1
178	1	1	bottom	NA	19	10	19-Oct	2017	18/12/2017	NA	29	15	19	4	NA	120	49	0	178_1_1_19-Oct	0	0	0	1
178	1	1	top	NA	19	10	19-Oct	2017	18/12/2017	NA	29	18	18	0	NA	121	49	0	178_1_1_19-Oct	0	0	0	1
178	1	10	bottom	NA	19	10	19-Oct	2017	18/12/2017	NA	29	23	23	0	NA	136	49	0	178_1_10_19-Oct	0	0	0	1
178	1	10	top	NA	19	10	19-Oct	2017	18/12/2017	NA	29	19	19	0	NA	137	49	0	178_1_10_19-Oct	0	0	0	1
178	1	2	bottom	NA	19	10	19-Oct	2017	18/12/2017	NA	29	16	19	3	NA	138	49	0	178_1_2_19-Oct	0	0	0	0.6875
178	1	2	top	NA	19	10	19-Oct	2017	18/12/2017	NA	29	10	12	2	NA	139	49	0	178_1_2_19-Oct	0	0	0	0.7
178	1	3	bottom	NA	19	10	19-Oct	2017	18/12/2017	NA	29	16	16	0	NA	122	49	0	178_1_3_19-Oct	0	0	0	1
178	1	3	top	NA	19	10	19-Oct	2017	18/12/2017	NA	29	8	8	0	NA	123	49	0	178_1_3_19-Oct	0	0	0	1
178	1	4	bottom	NA	19	10	19-Oct	2017	18/12/2017	NA	29	20	20	0	NA	124	49	0	178_1_4_19-Oct	0	0	0	1
178	1	4	top	NA	19	10	19-Oct	2017	18/12/2017	NA	29	7	7	0	NA	125	49	0	178_1_4_19-Oct	0	0	0	1
178	1	5	bottom	NA	19	10	19-Oct	2017	18/12/2017	NA	29	19	19	0	NA	126	49	0	178_1_5_19-Oct	0	0	0	1
178	1	5	top	NA	19	10	19-Oct	2017	18/12/2017	NA	29	14	14	0	NA	127	49	0	178_1_5_19-Oct	0	0	0	1
178	1	6	bottom	NA	19	10	19-Oct	2017	18/12/2017	NA	29	19	19	0	NA	128	49	0	178_1_6_19-Oct	0	0	0	0.947368421052632
178	1	6	top	NA	19	10	19-Oct	2017	18/12/2017	NA	29	10	10	0	NA	129	49	0	178_1_6_19-Oct	0	0	0	0.8
178	1	7	bottom	NA	19	10	19-Oct	2017	18/12/2017	NA	29	19	19	0	NA	130	49	0	178_1_7_19-Oct	0	0	0	1
178	1	7	top	NA	19	10	19-Oct	2017	18/12/2017	NA	29	15	15	0	NA	131	49	0	178_1_7_19-Oct	0	0	0	1
178	1	8	bottom	NA	19	10	19-Oct	2017	18/12/2017	NA	29	21	21	0	NA	132	49	0	178_1_8_19-Oct	0	0	0	1
178	1	8	top	NA	19	10	19-Oct	2017	18/12/2017	NA	29	22	22	0	NA	133	49	0	178_1_8_19-Oct	0	0	0	1
178	1	9	bottom	NA	19	10	19-Oct	2017	18/12/2017	NA	29	21	23	2	NA	134	49	0	178_1_9_19-Oct	0	0	0	1
178	1	9	top	NA	19	10	19-Oct	2017	18/12/2017	NA	29	13	15	2	NA	135	49	0	178_1_9_19-Oct	0	0	0	1
178	2	1	bottom	NA	19	10	19-Oct	2017	18/12/2017	NA	29	10	10	0	NA	140	49	1	178_2_1_19-Oct	10	10	0.1	1
178	2	1	top	NA	19	10	19-Oct	2017	18/12/2017	NA	29	13	13	0	NA	141	49	0	178_2_1_19-Oct	0	0	0	1
178	2	10	bottom	NA	19	10	19-Oct	2017	18/12/2017	NA	29	16	16	0	NA	156	49	0	178_2_10_19-Oct	0	0	0	1
178	2	10	top	NA	19	10	19-Oct	2017	18/12/2017	NA	29	22	22	0	NA	157	49	0	178_2_10_19-Oct	0	0	0	1
178	2	2	bottom	NA	19	10	19-Oct	2017	18/12/2017	NA	29	19	19	0	NA	158	49	0	178_2_2_19-Oct	0	0	0	1
178	2	2	top	NA	19	10	19-Oct	2017	18/12/2017	NA	29	20	20	0	NA	159	49	0	178_2_2_19-Oct	0	0	0	1
178	2	3	bottom	NA	19	10	19-Oct	2017	18/12/2017	NA	29	16	16	0	NA	142	49	0	178_2_3_19-Oct	0	0	0	1
178	2	3	top	NA	19	10	19-Oct	2017	18/12/2017	NA	29	16	16	0	NA	143	49	0	178_2_3_19-Oct	0	0	0	0.9375
178	2	4	bottom	NA	19	10	19-Oct	2017	18/12/2017	NA	29	26	26	0	NA	144	49	0	178_2_4_19-Oct	0	0	0	1
178	2	4	top	NA	19	10	19-Oct	2017	18/12/2017	NA	29	16	16	0	NA	145	49	1	178_2_4_19-Oct	6.25	6.25	0.0625	1
178	2	5	bottom	NA	19	10	19-Oct	2017	18/12/2017	NA	29	20	20	0	NA	146	49	0	178_2_5_19-Oct	0	0	0	1
178	2	5	top	NA	19	10	19-Oct	2017	18/12/2017	NA	29	8	8	0	NA	147	49	0	178_2_5_19-Oct	0	0	0	1
178	2	6	bottom	NA	19	10	19-Oct	2017	18/12/2017	NA	29	19	19	0	NA	148	49	0	178_2_6_19-Oct	0	0	0	1
178	2	6	top	NA	19	10	19-Oct	2017	18/12/2017	NA	29	24	24	0	NA	149	49	0	178_2_6_19-Oct	0	0	0	1
178	2	7	bottom	NA	19	10	19-Oct	2017	18/12/2017	NA	29	20	20	0	NA	150	49	0	178_2_7_19-Oct	0	0	0	1
178	2	7	top	NA	19	10	19-Oct	2017	18/12/2017	NA	29	21	21	0	NA	151	49	0	178_2_7_19-Oct	0	0	0	1
178	2	8	bottom	NA	19	10	19-Oct	2017	18/12/2017	NA	29	15	15	0	NA	152	49	0	178_2_8_19-Oct	0	0	0	1
178	2	8	top	NA	19	10	19-Oct	2017	18/12/2017	NA	29	17	17	0	NA	153	49	0	178_2_8_19-Oct	0	0	0	1
178	2	9	bottom	NA	19	10	19-Oct	2017	18/12/2017	NA	29	18	18	0	NA	154	49	0	178_2_9_19-Oct	0	0	0	1
178	2	9	top	NA	19	10	19-Oct	2017	18/12/2017	NA	29	19	19	0	NA	155	49	0	178_2_9_19-Oct	0	0	0	1
178	1	1	bottom	NA	19	10	19-Oct	2017	18/12/2017	NA	29	15	19	4	NA	120	50	0	178_1_1_19-Oct	0	0	0	1
178	1	1	top	NA	19	10	19-Oct	2017	18/12/2017	NA	29	18	18	0	NA	121	50	0	178_1_1_19-Oct	0	0	0	1
178	1	10	bottom	NA	19	10	19-Oct	2017	18/12/2017	NA	29	23	23	0	NA	136	50	0	178_1_10_19-Oct	0	0	0	1
178	1	10	top	NA	19	10	19-Oct	2017	18/12/2017	NA	29	19	19	0	NA	137	50	0	178_1_10_19-Oct	0	0	0	1
178	1	2	bottom	NA	19	10	19-Oct	2017	18/12/2017	NA	29	16	19	3	NA	138	50	0	178_1_2_19-Oct	0	0	0	0.6875
178	1	2	top	NA	19	10	19-Oct	2017	18/12/2017	NA	29	10	12	2	NA	139	50	0	178_1_2_19-Oct	0	0	0	0.7
178	1	3	bottom	NA	19	10	19-Oct	2017	18/12/2017	NA	29	16	16	0	NA	122	50	0	178_1_3_19-Oct	0	0	0	1
178	1	3	top	NA	19	10	19-Oct	2017	18/12/2017	NA	29	8	8	0	NA	123	50	0	178_1_3_19-Oct	0	0	0	1
178	1	4	bottom	NA	19	10	19-Oct	2017	18/12/2017	NA	29	20	20	0	NA	124	50	0	178_1_4_19-Oct	0	0	0	1
178	1	4	top	NA	19	10	19-Oct	2017	18/12/2017	NA	29	7	7	0	NA	125	50	0	178_1_4_19-Oct	0	0	0	1
178	1	5	bottom	NA	19	10	19-Oct	2017	18/12/2017	NA	29	19	19	0	NA	126	50	0	178_1_5_19-Oct	0	0	0	1
178	1	5	top	NA	19	10	19-Oct	2017	18/12/2017	NA	29	14	14	0	NA	127	50	0	178_1_5_19-Oct	0	0	0	1
178	1	6	bottom	NA	19	10	19-Oct	2017	18/12/2017	NA	29	19	19	0	NA	128	50	0	178_1_6_19-Oct	0	0	0	0.947368421052632
178	1	6	top	NA	19	10	19-Oct	2017	18/12/2017	NA	29	10	10	0	NA	129	50	0	178_1_6_19-Oct	0	0	0	0.8
178	1	7	bottom	NA	19	10	19-Oct	2017	18/12/2017	NA	29	19	19	0	NA	130	50	0	178_1_7_19-Oct	0	0	0	1
178	1	7	top	NA	19	10	19-Oct	2017	18/12/2017	NA	29	15	15	0	NA	131	50	0	178_1_7_19-Oct	0	0	0	1
178	1	8	bottom	NA	19	10	19-Oct	2017	18/12/2017	NA	29	21	21	0	NA	132	50	0	178_1_8_19-Oct	0	0	0	1
178	1	8	top	NA	19	10	19-Oct	2017	18/12/2017	NA	29	22	22	0	NA	133	50	0	178_1_8_19-Oct	0	0	0	1
178	1	9	bottom	NA	19	10	19-Oct	2017	18/12/2017	NA	29	21	23	2	NA	134	50	0	178_1_9_19-Oct	0	0	0	1
178	1	9	top	NA	19	10	19-Oct	2017	18/12/2017	NA	29	13	15	2	NA	135	50	0	178_1_9_19-Oct	0	0	0	1
178	2	1	bottom	NA	19	10	19-Oct	2017	18/12/2017	NA	29	10	10	0	NA	140	50	0	178_2_1_19-Oct	0	0	0	1
178	2	1	top	NA	19	10	19-Oct	2017	18/12/2017	NA	29	13	13	0	NA	141	50	0	178_2_1_19-Oct	0	0	0	1
178	2	10	bottom	NA	19	10	19-Oct	2017	18/12/2017	NA	29	16	16	0	NA	156	50	0	178_2_10_19-Oct	0	0	0	1
178	2	10	top	NA	19	10	19-Oct	2017	18/12/2017	NA	29	22	22	0	NA	157	50	0	178_2_10_19-Oct	0	0	0	1
178	2	2	bottom	NA	19	10	19-Oct	2017	18/12/2017	NA	29	19	19	0	NA	158	50	0	178_2_2_19-Oct	0	0	0	1
178	2	2	top	NA	19	10	19-Oct	2017	18/12/2017	NA	29	20	20	0	NA	159	50	0	178_2_2_19-Oct	0	0	0	1
178	2	3	bottom	NA	19	10	19-Oct	2017	18/12/2017	NA	29	16	16	0	NA	142	50	0	178_2_3_19-Oct	0	0	0	1
178	2	3	top	NA	19	10	19-Oct	2017	18/12/2017	NA	29	16	16	0	NA	143	50	0	178_2_3_19-Oct	0	0	0	0.9375
178	2	4	bottom	NA	19	10	19-Oct	2017	18/12/2017	NA	29	26	26	0	NA	144	50	0	178_2_4_19-Oct	0	0	0	1
178	2	4	top	NA	19	10	19-Oct	2017	18/12/2017	NA	29	16	16	0	NA	145	50	0	178_2_4_19-Oct	0	0	0	1
178	2	5	bottom	NA	19	10	19-Oct	2017	18/12/2017	NA	29	20	20	0	NA	146	50	0	178_2_5_19-Oct	0	0	0	1
178	2	5	top	NA	19	10	19-Oct	2017	18/12/2017	NA	29	8	8	0	NA	147	50	0	178_2_5_19-Oct	0	0	0	1
178	2	6	bottom	NA	19	10	19-Oct	2017	18/12/2017	NA	29	19	19	0	NA	148	50	0	178_2_6_19-Oct	0	0	0	1
178	2	6	top	NA	19	10	19-Oct	2017	18/12/2017	NA	29	24	24	0	NA	149	50	0	178_2_6_19-Oct	0	0	0	1
178	2	7	bottom	NA	19	10	19-Oct	2017	18/12/2017	NA	29	20	20	0	NA	150	50	0	178_2_7_19-Oct	0	0	0	1
178	2	7	top	NA	19	10	19-Oct	2017	18/12/2017	NA	29	21	21	0	NA	151	50	0	178_2_7_19-Oct	0	0	0	1
178	2	8	bottom	NA	19	10	19-Oct	2017	18/12/2017	NA	29	15	15	0	NA	152	50	0	178_2_8_19-Oct	0	0	0	1
178	2	8	top	NA	19	10	19-Oct	2017	18/12/2017	NA	29	17	17	0	NA	153	50	0	178_2_8_19-Oct	0	0	0	1
178	2	9	bottom	NA	19	10	19-Oct	2017	18/12/2017	NA	29	18	18	0	NA	154	50	0	178_2_9_19-Oct	0	0	0	1
178	2	9	top	NA	19	10	19-Oct	2017	18/12/2017	NA	29	19	19	0	NA	155	50	0	178_2_9_19-Oct	0	0	0	1
178	1	1	bottom	NA	19	10	19-Oct	2017	18/12/2017	NA	29	15	19	4	NA	120	51	0	178_1_1_19-Oct	0	0	0	1
[truncated: 1,359 more rows]
