# Supplementary material for: An ABA-GA bistable switch can account for natural variation in the variability of Arabidopsis seed germination time
Source: eLife. 2021 Jun 1;10:e59485. doi: 10.7554/eLife.59485 (PMC8169117; doi:10.7554/eLife.59485)
Supplement: Figure 3—figure supplement 2—source data 1. [file elife-59485-fig3-figsupp2-data1.tds]

Magic_line	Sowing_round	meanDAR	mean_mean	mean_mode	mean_cv	mean_percent	Group
Bur-0	1	30	2.033669893	2	0.092542656	98.51169226	Parent
Can-0	1	28	2.059295352	2	0.111244159	99.71264368	Parent
Col-0	1	33	2.002604167	2	0.014674071	98.47707848	Parent
Ct-1	1	28	2.736769462	3	0.159623298	45.25005231	Parent
Edi-1	1	21	3.673987941	3.666666667	0.197084261	38.31910752	Parent
Hi-0	1	31	4.132926764	4	0.249750211	23.42149066	Parent
Kn-0	1	23	3.333221816	3	0.150271941	99.76190476	Parent
Ler-0	1	28	3.418470911	3.25	0.169954095	99.56521739	Parent
Mt-0	1	29	2.723355873	2.666666667	0.209614219	98.89799636	Parent
No-0	1	26	2.839945238	2.75	0.287166899	96.72620241	Parent
Oy-0	1	27	3.333333333	3.666666667	0.241536971	24.46330881	Parent
Po-0	1	28	3.004667932	2.5	0.311554207	68.21996186	Parent
Rsch-4	1	29	2.973436136	3	0.241956967	55.14383481	Parent
Sf-2	1b	29	4.111788049	3	0.324571891	49.72995963	Parent
Tsu-0	1	28	3.472476886	3	0.243318288	69.25650775	Parent
Wil-2	1	28	3.574410711	3.375	0.185985713	31.76985615	Parent
Ws-0	1b	29	4.168678612	3.333333333	0.361587277	82.89685206	Parent
Wu-0	1	28	4.375	3.75	0.2729668	31.49788953	Parent
Zu-0	1b	32	4.444699433	4	0.257913072	45.4179693	Parent
Alb-1	NA	37	5.417171717	3.833333333	0.529021045	22.01010452	Accession
Aul-0	NA	27	7.062890813	6.5	0.477604154	26.06560119	Accession
Bob-0	NA	37	3.73592646	3.333333333	0.347766676	67.10376201	Accession
Fei-0	NA	26	3.649337953	3.666666667	0.199269408	92.57623225	Accession
Hor-0	NA	27	5	4.5	0.297651002	18.09701493	Accession
Mad-0	NA	27	3.609303181	3	0.339254956	58.61885297	Accession
Naa-0	NA	27	5.923076923	4	0.544732567	38.23529412	Accession
Ovi-1	NA	26	3.135135135	3	0.292744033	23.41772152	Accession
Rio-2	NA	27	4.554901961	4	0.266946977	30.81657223	Accession
Svi-0	NA	37	2.863247863	3	0.180811415	12.44741521	Accession
