# Supplementary material for: An ABA-GA bistable switch can account for natural variation in the variability of Arabidopsis seed germination time
Source: eLife. 2021 Jun 1;10:e59485. doi: 10.7554/eLife.59485 (PMC8169117; doi:10.7554/eLife.59485)
Supplement: Figure 3—figure supplement 2—source data 2. [file elife-59485-fig3-figsupp2-data2.tds]

Line	day	perc	name	group	RepNumber
Ct-1	1	0	4_26-Oct_1A_28	magic parents	1
Ct-1	2	5.93220339	4_26-Oct_1A_28	magic parents	1
Ct-1	3	27.96610169	4_26-Oct_1A_28	magic parents	1
Ct-1	4	0	4_26-Oct_1A_28	magic parents	1
Ct-1	5	0	4_26-Oct_1A_28	magic parents	1
Ct-1	1	0	4_26-Oct_1B_28	magic parents	2
Ct-1	2	33.33333333	4_26-Oct_1B_28	magic parents	2
Ct-1	3	35.18518519	4_26-Oct_1B_28	magic parents	2
Ct-1	4	0	4_26-Oct_1B_28	magic parents	2
Ct-1	5	0	4_26-Oct_1B_28	magic parents	2
Ct-1	1	0	4_26-Oct_2A_28	magic parents	3
Ct-1	2	5.128205128	4_26-Oct_2A_28	magic parents	3
Ct-1	3	27.35042735	4_26-Oct_2A_28	magic parents	3
Ct-1	4	0.854700855	4_26-Oct_2A_28	magic parents	3
Ct-1	5	0	4_26-Oct_2A_28	magic parents	3
Mad-0	1	0	Mad-0_1_30-Jan_27	accessions	1
Mad-0	2	0.869565217	Mad-0_1_30-Jan_27	accessions	1
Mad-0	3	17.39130435	Mad-0_1_30-Jan_27	accessions	1
Mad-0	4	9.565217391	Mad-0_1_30-Jan_27	accessions	1
Mad-0	5	6.956521739	Mad-0_1_30-Jan_27	accessions	1
Mad-0	6	6.956521739	Mad-0_1_30-Jan_27	accessions	1
Mad-0	7	0.869565217	Mad-0_1_30-Jan_27	accessions	1
Mad-0	8	0	Mad-0_1_30-Jan_27	accessions	1
Mad-0	9	0	Mad-0_1_30-Jan_27	accessions	1
Mad-0	1	0	Mad-0_2_30-Jan_27	accessions	2
Mad-0	2	23.07692308	Mad-0_2_30-Jan_27	accessions	2
Mad-0	3	24.78632479	Mad-0_2_30-Jan_27	accessions	2
Mad-0	4	7.692307692	Mad-0_2_30-Jan_27	accessions	2
Mad-0	5	0.854700855	Mad-0_2_30-Jan_27	accessions	2
Mad-0	6	1.709401709	Mad-0_2_30-Jan_27	accessions	2
Mad-0	7	0.854700855	Mad-0_2_30-Jan_27	accessions	2
Mad-0	8	1.709401709	Mad-0_2_30-Jan_27	accessions	2
Mad-0	9	2.564102564	Mad-0_2_30-Jan_27	accessions	2
Mad-0	1	0	Mad-0_3_30-Jan_27	accessions	3
Mad-0	2	1.538461538	Mad-0_3_30-Jan_27	accessions	3
Mad-0	3	40	Mad-0_3_30-Jan_27	accessions	3
Mad-0	4	26.15384615	Mad-0_3_30-Jan_27	accessions	3
Mad-0	5	1.538461538	Mad-0_3_30-Jan_27	accessions	3
Mad-0	6	0.769230769	Mad-0_3_30-Jan_27	accessions	3
Mad-0	7	0	Mad-0_3_30-Jan_27	accessions	3
Mad-0	8	0	Mad-0_3_30-Jan_27	accessions	3
Mad-0	9	0	Mad-0_3_30-Jan_27	accessions	3
