# Supplementary material for: An ABA-GA bistable switch can account for natural variation in the variability of Arabidopsis seed germination time
Source: eLife. 2021 Jun 1;10:e59485. doi: 10.7554/eLife.59485 (PMC8169117; doi:10.7554/eLife.59485)
Supplement: Figure 3—source data 1. [file elife-59485-fig3-data1.tds]

Magic_line	meanDAR	mean_mode	mean_cv	mean_percent	Group
M101	33.8	4.625	0.749644996	67.28833929	MAGIC
M103	28	3.333333333	0.328625105	40.76859922	MAGIC
M104	28	3	0.210103571	77.04720389	MAGIC
M106	40	3	0.341533051	75.19920377	MAGIC
M107	37	3.8	0.324166018	91.33030655	MAGIC
M108	28	3	0.091470191	99.54642504	MAGIC
M109	37	3.333333333	0.299799483	81.77956344	MAGIC
M11	29.5	2.763888889	0.198131293	63.88450122	MAGIC
M111	28	4.583333333	0.223018168	66.8844477	MAGIC
M112	24	4.333333333	0.25899219	81.75164598	MAGIC
M113	27	3	0.221257027	93.0659172	MAGIC
M114	32.25	3.416666667	0.189517133	98.91937374	MAGIC
M115	29	3.25	0.309796561	19.00578572	MAGIC
M116	37	3	0.121418568	99.35910943	MAGIC
M117	34	2	0.224721468	99.0960249	MAGIC
M118	37	3	0.134400283	97.37425894	MAGIC
M119	31	2.833333333	0.299302641	63.3398646	MAGIC
M12	31.5	3.25	0.141946658	56.1251483	MAGIC
M121	25	3	0.24222494	98.57031213	MAGIC
M122	29	3	0.143064383	99.15776609	MAGIC
M123	36	2	0.109193301	99.67960847	MAGIC
M124	34	2.5	0.210665771	99.05043046	MAGIC
M127	34	3	0.365276519	81.95513576	MAGIC
M128	25	3	0.11544161	98.93135876	MAGIC
M129	30	2	0.298919034	95.93444297	MAGIC
M131	30	4.333333333	0.304869593	45.98340325	MAGIC
M135	24	2	0.200576117	99.59100204	MAGIC
M138	32	3	0.224858321	97.3894277	MAGIC
M139	32	3.5	0.204265848	97.64129798	MAGIC
M14	36	3.375	0.286767179	48.06438265	MAGIC
M140	32	3.5	0.283055273	11.35275172	MAGIC
M141	35	5.777777778	0.35392392	27.29971479	MAGIC
M142	33	3	0.15654357	98.41269841	MAGIC
M143	30.33333333	4.333333333	0.84270391	97.62401313	MAGIC
M144	33	3.666666667	0.29503415	71.45211121	MAGIC
M145	32	2	0.177747834	99.8447205	MAGIC
M147	36	2.5	0.127570717	99.26070885	MAGIC
M148	30	2.666666667	0.197150877	98.63013699	MAGIC
M149	33	3	0.17915481	99.31353876	MAGIC
M151	31	3	0.108126199	93.44206316	MAGIC
M153	33	2.666666667	0.161700377	99.27716728	MAGIC
M156	33	3	0.162984487	93.8198191	MAGIC
M157	33	3	0.168530032	11.38665785	MAGIC
M158	30	2.333333333	0.238888663	98.40653695	MAGIC
M159	33	2.666666667	0.221625219	92.34496492	MAGIC
M160	32	2.666666667	0.126863028	98.42472674	MAGIC
M161	32	4	0.236163912	75.36257812	MAGIC
M162	30	3	0.133011434	98.94939494	MAGIC
M163	30	3	0.094949519	99.28149342	MAGIC
M164	35	3	0.192554239	98.71585683	MAGIC
M166	31	4.666666667	0.211982958	45.66294185	MAGIC
M167	30	3.666666667	0.145044894	61.56483162	MAGIC
M168	30	3	0.126808445	100	MAGIC
M17	26	2.142857143	0.144183319	98.51797862	MAGIC
M171	33	3	0.146984238	99.26739927	MAGIC
M174	29	3	0.68075305	40.02691543	MAGIC
M176	33	3	0.274630189	92.96073182	MAGIC
M177	35	3	0.198207663	98.72826231	MAGIC
M178	33.66666667	4.174603175	0.906094917	87.2882052	MAGIC
M179	35.4	3.133333333	0.213486321	53.81643831	MAGIC
M18	24	2.5	0.218315843	98.61853832	MAGIC
M180	32	2	0.197311048	98.31274308	MAGIC
M182	35.14285714	7.404761905	0.879400803	74.76605466	MAGIC
M183	33	3.666666667	0.296033678	22.82019859	MAGIC
M186	33	3	0.141243369	99.61764482	MAGIC
M188	36.5	3.520833333	0.166657863	32.92224689	MAGIC
M189	31	4	0.215339281	65.56052856	MAGIC
M190	34	4	0.237506588	39.52471604	MAGIC
M191	35	3.833333333	0.188326225	98.0952381	MAGIC
M192	29	4.333333333	0.218504088	39.82640121	MAGIC
M193	33	2.666666667	0.130097341	99.78070175	MAGIC
M194	33	3	0.120343075	99.89451477	MAGIC
M195	33	6.666666667	0.24931397	11.09165687	MAGIC
M197	30	3	0.15062401	79.02124881	MAGIC
M198	34	3	0.187105451	97.06280193	MAGIC
M199	33	3	0.120223137	98.89256862	MAGIC
M20	28	3	0.309850622	19.24383615	MAGIC
M200	33	4	0.156802484	98.44373051	MAGIC
M203	29	2.833333333	0.105391452	100	MAGIC
M205	31	3	0.192993205	68.59025416	MAGIC
M206	32	2.5	0.306802803	54.89323441	MAGIC
M207	32	3	0.157715776	85.09556762	MAGIC
M209	33	7.333333333	0.270826135	28.25627934	MAGIC
M21	25	2	0.229407313	92.91813382	MAGIC
M213	33	3	0.110024874	99.81167608	MAGIC
M215	31	3	0.254639126	11.12048193	MAGIC
M218	33	3	0.163347056	62.68840583	MAGIC
M220	30	2.75	0.160070838	84.04111053	MAGIC
M221	27	2	0.257076028	97.94957983	MAGIC
M223	29	3.5	0.236534021	11.47875817	MAGIC
M224	32	2	0.109964571	100	MAGIC
M229	32	2	0.13545071	100	MAGIC
M23	24	2	0.14738842	98.92306005	MAGIC
M231	27	3	0.25313528	99.79423868	MAGIC
M232	26	3	0.190609791	92.3673904	MAGIC
M233	28	3	0.112711483	100	MAGIC
M234	28	4	0.206944204	32.91528823	MAGIC
M237	28	3.333333333	0.168887052	84.56629782	MAGIC
M239	33	4	0.413756335	89.32063766	MAGIC
M24	30.4	3.383333333	0.342516553	66.08674092	MAGIC
M240	27	2.666666667	0.231496625	99.27410618	MAGIC
M241	30	2.25	0.122635822	99.75047506	MAGIC
M242	31	3	0.324123852	60.85898737	MAGIC
M245	27	2.666666667	0.224461858	96.41102634	MAGIC
M248	31	3	0.22431136	61.34128523	MAGIC
M25	28	2	0.199708362	99.55357143	MAGIC
M250	31	4	0.272413007	60.54271171	MAGIC
M251	26	3.333333333	0.261423551	65.05253963	MAGIC
M254	27	3	0.176920645	100	MAGIC
M255	30	6	0.341379577	27.23808138	MAGIC
M256	25	3	0.186724076	87.23924656	MAGIC
M26	27	3.75	0.397189374	64.02061733	MAGIC
M261	31	2.666666667	0.188305685	99.77628635	MAGIC
M264	29	3	0.141670002	100	MAGIC
M265	30	2	0.170408027	99.20634921	MAGIC
M266	31	4	0.240935202	47.23035151	MAGIC
M276	27	3	0.149783555	100	MAGIC
M278	27	3	0.194579574	99.44134078	MAGIC
M283	29	3	0.240258338	74.19354839	MAGIC
M285	28	3.666666667	0.478440823	65.82867841	MAGIC
M286	33	3	0.220489356	96.80137351	MAGIC
M287	27	3	0.16200476	13.28231259	MAGIC
M289	31	2.75	0.243854131	92.39700076	MAGIC
M290	24	2.666666667	0.216877837	82.01082089	MAGIC
M291	32	4	0.319140983	15.55299539	MAGIC
M292	31	3	0.176721211	91.08063549	MAGIC
M293	32	3	0.203730437	99.25893871	MAGIC
M295	28	3	0.281914185	97.62000195	MAGIC
M296	28	3	0.173934237	97.1738919	MAGIC
M30	27	4	0.187763841	24.22849088	MAGIC
M301	31	3	0.230017201	24.88137665	MAGIC
M302	32	3	0.137241978	97.8911816	MAGIC
M303	27	3.666666667	0.312271116	86.37039509	MAGIC
M304	26	3	1.733959455	80.28353448	MAGIC
M305	29	3.25	0.412769905	89.96478873	MAGIC
M308	28	3	0.166786644	87.75611474	MAGIC
M310	26	3	0.145855231	92.8499605	MAGIC
M311	28.5	2.916666667	1.306976004	41.34362386	MAGIC
M312	27	2.666666667	0.190510169	96.64812646	MAGIC
M314	32	3	0.141917811	98.87789575	MAGIC
M315	28	2	0.164158344	39.57134561	MAGIC
M316	28	3	0.353075758	39.87179487	MAGIC
M317	25	3	0.157131967	97.54695022	MAGIC
M319	28	2	0.256273004	82.34400756	MAGIC
M320	26	3	0.230014492	11.94029851	MAGIC
M321	32	2.25	0.239099658	91.75441049	MAGIC
M322	27	3	0.155051421	95.38165268	MAGIC
M323	29	2.333333333	0.214375391	93.31310884	MAGIC
M325	33	3	0.214237047	88.59575834	MAGIC
M326	32	3	0.118246717	97.02437505	MAGIC
M327	31	2.666666667	0.198811974	90.75885617	MAGIC
M328	29	2.666666667	0.217833045	92.27286672	MAGIC
M329	30.33333333	3.111111111	0.193468354	95.9262341	MAGIC
M330	27	3.25	0.2545606	94.34475504	MAGIC
M332	39	2	0.208280771	98.72408953	MAGIC
M334	32	3	0.236076145	95.95588235	MAGIC
M336	39	3	0.573535426	39.54323277	MAGIC
M337	40	3	0.307353825	68.42525979	MAGIC
M338	34	2	0.208235217	95.71292524	MAGIC
M339	40	2.833333333	0.22920539	20.53064163	MAGIC
M34	27	3.333333333	0.222644557	89.74807906	MAGIC
M342	39	2.8	0.227154211	99.26186379	MAGIC
M344	31	3.3	0.350628994	65.04939991	MAGIC
M345	30	2.666666667	0.23364444	97.24556489	MAGIC
M346	33	2.8	0.214955751	97.39269275	MAGIC
M347	38	3	0.21299288	95.77044866	MAGIC
M348	35	2.5	0.213285157	96.80596437	MAGIC
M349	34	2.333333333	0.247060254	95.51869686	MAGIC
M351	38	3	0.430816461	36.65757334	MAGIC
M353	31	2	0.217688515	99.12039144	MAGIC
M355	33	2	0.36839596	92.86187288	MAGIC
M358	38	2.333333333	0.207257148	97.98528469	MAGIC
M360	40	3	0.193203162	95.76897807	MAGIC
M362	34	2	0.201795592	94.1351528	MAGIC
M363	35	3.25	0.306770655	40.53372152	MAGIC
M364	30	2	0.187317463	97.40880503	MAGIC
M365	36	2.8	0.313252138	92.67993173	MAGIC
M366	33	2.333333333	0.195853227	99.55003324	MAGIC
M367	32	3	0.269022	81.04831843	MAGIC
M368	34	2	0.217120604	76.74563267	MAGIC
M369	34	2	0.193243496	98.39801174	MAGIC
M37	24	2	0.137592652	97.27272727	MAGIC
M370	30	3	0.25549665	65.27920741	MAGIC
M371	43	3	0.226086804	98.67897727	MAGIC
M372	40	2	0.206342473	85.18043738	MAGIC
M373	33	2	0.139009653	98.02165902	MAGIC
M375	40	3.333333333	0.248174764	31.80159388	MAGIC
M377	32	3	0.249251565	83.52689428	MAGIC
M378	35	3	0.301401971	47.48504469	MAGIC
M379	38	2.5	0.243207606	90.50964765	MAGIC
M38	27	2.25	0.226670015	94.40086457	MAGIC
M380	31	3	0.288214444	64.1025641	MAGIC
M381	29	2.333333333	0.185117513	94.69907407	MAGIC
M382	30	2	0.253848097	97.5308642	MAGIC
M385	33	3.333333333	0.737472256	58.15361437	MAGIC
M388	29	3.333333333	0.173194182	81.19960202	MAGIC
M389	31	2	0.360516563	99.27359921	MAGIC
M39	24	3	0.316869355	96.25386659	MAGIC
M390	30	3.25	0.201276476	81.34637677	MAGIC
M391	31	3	0.189932044	99.29392447	MAGIC
M392	32	3	0.2165819	32.90888696	MAGIC
M393	29	3	0.421604599	96.24417952	MAGIC
M395	31	3.2	0.167730718	99.55963194	MAGIC
M396	29	5.25	0.26624297	36.3255719	MAGIC
M397	30	3	0.121318045	86.8112	MAGIC
M398	32	2.333333333	0.224528697	96.06800299	MAGIC
M4	27	4.5	0.346439923	95.61147715	MAGIC
M40	33	2.533333333	0.194256764	99.30896343	MAGIC
M400	32	3	0.328470405	30.40562086	MAGIC
M401	31	3	0.167619699	89.67938527	MAGIC
M402	26	3.666666667	0.225368414	72.76937109	MAGIC
M403	33	3	0.163246361	81.20669407	MAGIC
M409	32	3	0.158066384	89.1546463	MAGIC
M413	29	2.333333333	0.198358295	99.89711934	MAGIC
M414	32	2.333333333	0.201924106	98.64864865	MAGIC
M415	32	3	0.196774176	69.02310155	MAGIC
M416	32	2.8	0.276173595	95.63443822	MAGIC
M418	30	2.75	0.176030059	97.43906124	MAGIC
M419	30	3.25	0.231855455	24.98090875	MAGIC
M42	29	2	0.130121152	98.9330006	MAGIC
M420	32	2.333333333	0.196044535	99.77777778	MAGIC
M421	32	2	0.145037998	99.70249945	MAGIC
M423	29	3	0.348316548	35.87517637	MAGIC
M424	30	4	0.271879783	24.34883841	MAGIC
M425	29	3	0.214786976	10.34769463	MAGIC
M426	30	3	0.185062954	39.55378661	MAGIC
M427	32	3.333333333	0.164999819	80.43381555	MAGIC
M428	31	3.2	0.182985605	99.44533641	MAGIC
M429	32	2.333333333	0.191722188	93.08565531	MAGIC
M43	25	3	0.279259985	98.23198198	MAGIC
M430	29	2.2	0.186449661	95.54756055	MAGIC
M436	30	3	0.202936621	83.36465138	MAGIC
M437	31	2	0.148205836	100	MAGIC
M44	32	2	0.182150055	99.35211116	MAGIC
M441	24	3.333333333	0.175093656	97.35283426	MAGIC
M442	33	3	0.209380685	28.3045977	MAGIC
M443	31	2.5	0.227919235	19.44531989	MAGIC
M447	29	4.25	0.256269039	50.56873139	MAGIC
M448	26	4	0.318499069	22.06896552	MAGIC
M449	26	3.333333333	0.236560269	17.41777356	MAGIC
M45	29.5	3.5	0.183614715	73.87310259	MAGIC
M450	26	4	0.267036953	80.97625772	MAGIC
M451	26	4.25	0.288213398	26.04631256	MAGIC
M453	29	3.666666667	0.242177646	29.27799427	MAGIC
M454	31	3	0.204951496	99.49476267	MAGIC
M456	30	4	0.223189476	61.23866535	MAGIC
M457	33	3	0.16265077	99.79423868	MAGIC
M458	30	3.4	0.161589517	87.08084409	MAGIC
M460	29	3.2	0.142829705	99.73154362	MAGIC
M461	30	3.4	0.171707382	70.11435209	MAGIC
M462	29	4.333333333	0.175390635	44.33452274	MAGIC
M464	31	3	0.209027198	92.34538158	MAGIC
M466	33	2.75	0.188154131	99.51681332	MAGIC
M467	33	3	0.111944374	99.36705426	MAGIC
M468	29	3	0.235189185	27.15419501	MAGIC
M469	29	2.8	0.296682269	97.71867204	MAGIC
M473	28	3.25	0.339311425	40.53061981	MAGIC
M474	31	3	0.124984154	99.78070175	MAGIC
M475	32	3	0.308267328	81.66360824	MAGIC
M476	29	3.333333333	0.12687508	99.86979167	MAGIC
M478	29	3	0.302537101	19.89093225	MAGIC
M479	36	2.666666667	0.186176042	99.54954955	MAGIC
M480	30	3	0.214534594	99.39814815	MAGIC
M481	30	3	0.172971712	65.6965754	MAGIC
M482	32	2.8	0.19570107	93.17537511	MAGIC
M483	29	3.166666667	0.441183943	84.34271017	MAGIC
M485	31	3	0.113399827	100	MAGIC
M487	32	4	0.354910894	54.32028821	MAGIC
M49	28	3.75	0.244937205	37.57836864	MAGIC
M490	33	3.333333333	0.230392948	69.61289746	MAGIC
M491	35	2	0.233843509	97.54960317	MAGIC
M492	32	4	0.395604342	70.85648411	MAGIC
M493	32	3	0.248692038	97.3733082	MAGIC
M494	35	3	0.149132543	97.24094471	MAGIC
M495	34	2	0.154341906	99.40342673	MAGIC
M496	32	3	0.274759361	42.40278909	MAGIC
M498	33	2	0.139803079	97.49811036	MAGIC
M499	30	2	0.154003192	95.69200729	MAGIC
M501	33	2.333333333	0.185495014	99.59469781	MAGIC
M502	28	3	0.235738954	64.12619724	MAGIC
M503	30	2.666666667	0.221371415	97.71041341	MAGIC
M504	33	3	0.130863278	99.62756052	MAGIC
M505	30	2	0.251270901	57.3379753	MAGIC
M506	33	2.5	0.267039197	99.21729477	MAGIC
M507	30	4.333333333	0.273899884	98.71225821	MAGIC
M508	30	3.666666667	0.300763873	61.32469336	MAGIC
M509	31	2.333333333	0.220152879	96.25726307	MAGIC
M51	25	4	0.312843682	77.39816949	MAGIC
M510	31	2.666666667	0.20405635	92.77524608	MAGIC
M511	33	2.25	0.221182545	98.98961263	MAGIC
M513	30	3.6	0.253623883	69.08516583	MAGIC
M514	35	2	0.208569432	99.23112303	MAGIC
M515	31	3	0.195670353	98.46312612	MAGIC
M516	30	2	0.205625474	95.937332	MAGIC
M517	29	2.75	0.319048569	73.22418786	MAGIC
M518	33	2	0.341021287	90.93335649	MAGIC
M519	31	3	0.268048743	98.67125654	MAGIC
M52	25	3	0.159648687	99.51923077	MAGIC
M520	32	3	0.135343521	99.11021426	MAGIC
M521	32	2.25	0.197648249	97.93594057	MAGIC
M523	31	3	0.131145118	99.48630137	MAGIC
M524	33	3	0.312379667	43.62463394	MAGIC
M525	32	3	0.19690184	97.82608696	MAGIC
M526	34	3	0.21658223	93.10331825	MAGIC
M527	33	2.333333333	0.245721777	49.43040639	MAGIC
M53	34.5	4.083333333	0.406107066	80.06832476	MAGIC
M54	25	2.75	0.219990698	67.38635248	MAGIC
M55	25	3	0.258103797	88.76426604	MAGIC
M57	27	2.333333333	0.189689352	98.73015873	MAGIC
M59	27	3	0.199665867	99.28558591	MAGIC
M6	25	2.666666667	0.309230389	86.73556154	MAGIC
M60	29	2.25	0.264334315	91.1140414	MAGIC
M63	28	3	0.184429566	75.16660368	MAGIC
M64	34.6	2.9	0.184596012	97.58172099	MAGIC
M66	28	3	0.138569027	99.06667969	MAGIC
M67	28	3	0.166822819	92.0642234	MAGIC
M68	31	3.666666667	0.185803602	92.61300725	MAGIC
M70	31	2.4	0.28167506	93.93089787	MAGIC
M71	29	3	0.238540622	96.13158786	MAGIC
M72	34.4	3.4	0.382048815	72.12948619	MAGIC
M73	31	3.333333333	0.21910723	85.54908917	MAGIC
M75	29	3	0.199292096	98.64497712	MAGIC
M79	30	3	0.193013541	91.70984405	MAGIC
M8	27	3	0.16877358	98.59399846	MAGIC
M80	30	2	0.164671193	95.75874859	MAGIC
M81	28	2.5	0.147237159	99.15126598	MAGIC
M83	32	3	0.207641971	37.62426027	MAGIC
M85	31	3	0.25141783	82.13527002	MAGIC
M86	28	3	0.173131547	11.46101683	MAGIC
M88	28	3	0.193389933	98.78283222	MAGIC
M89	29	2.666666667	0.175291729	97.66753819	MAGIC
M9	30	3	0.221055351	99.5412844	MAGIC
M90	28	3	0.184313446	97.5864141	MAGIC
M91	29	3	0.248753383	88.88728866	MAGIC
M92	30	3	0.240367911	94.44852941	MAGIC
M94	31	4.5	0.221094577	65.36830337	MAGIC
M95	31	3	0.212201296	96.95572746	MAGIC
M96	29	3	0.285011716	87.09850072	MAGIC
M97	34	4.25	0.348107994	17.26512872	MAGIC
M98	27	3	0.189011606	97.3178782	MAGIC
M99	34.5	2.666666667	0.317709625	81.87291308	MAGIC
