# Supplementary material for: An ABA-GA bistable switch can account for natural variation in the variability of Arabidopsis seed germination time
Source: eLife. 2021 Jun 1;10:e59485. doi: 10.7554/eLife.59485 (PMC8169117; doi:10.7554/eLife.59485)
Supplement: Figure 3—source data 2. [file elife-59485-fig3-data2.tds]

Magic_line	Plant	Sowing.day	Sowing.month	Sowing_date	Year	Scoring.date	Mother.plant.sowing.number	DAR	MeanDAR	Total.germinated	Total	NonGer	id	RepNumber	day	number	name	perc	perc_total_ger	group
M108	1	4	3	4-Mar	2016		3	28	28	156	156	0	64	1	1	0	M108_04-Mar_1	0	0	magic
M108	1	4	3	4-Mar	2016		3	28	28	156	156	0	64	1	2	0	M108_04-Mar_1	0	0	magic
M108	1	4	3	4-Mar	2016		3	28	28	156	156	0	64	1	3	142	M108_04-Mar_1	91.02564103	91.02564103	magic
M108	1	4	3	4-Mar	2016		3	28	28	156	156	0	64	1	4	13	M108_04-Mar_1	8.333333333	8.333333333	magic
M108	1	4	3	4-Mar	2016		3	28	28	156	156	0	64	1	5	1	M108_04-Mar_1	0.641025641	0.641025641	magic
M108	2	4	3	4-Mar	2016		3	28	28	159	160	1	65	2	1	0	M108_04-Mar_2	0	0	magic
M108	2	4	3	4-Mar	2016		3	28	28	159	160	1	65	2	2	0	M108_04-Mar_2	0	0	magic
M108	2	4	3	4-Mar	2016		3	28	28	159	160	1	65	2	3	152	M108_04-Mar_2	95	95.59748428	magic
M108	2	4	3	4-Mar	2016		3	28	28	159	160	1	65	2	4	7	M108_04-Mar_2	4.375	4.402515723	magic
M108	2	4	3	4-Mar	2016		3	28	28	159	160	1	65	2	5	0	M108_04-Mar_2	0	0	magic
M108	4	4	3	4-Mar	2016		3	28	28	160	161	1	66	3	1	0	M108_04-Mar_4	0	0	magic
M108	4	4	3	4-Mar	2016		3	28	28	160	161	1	66	3	2	1	M108_04-Mar_4	0.621118012	0.625	magic
M108	4	4	3	4-Mar	2016		3	28	28	160	161	1	66	3	3	142	M108_04-Mar_4	88.19875776	88.75	magic
M108	4	4	3	4-Mar	2016		3	28	28	160	161	1	66	3	4	16	M108_04-Mar_4	9.937888199	10	magic
M108	4	4	3	4-Mar	2016		3	28	28	160	161	1	66	3	5	1	M108_04-Mar_4	0.621118012	0.625	magic
M108	5	4	3	4-Mar	2016		3	28	28	175	176	1	67	4	1	0	M108_04-Mar_5	0	0	magic
M108	5	4	3	4-Mar	2016		3	28	28	175	176	1	67	4	2	7	M108_04-Mar_5	3.977272727	4	magic
M108	5	4	3	4-Mar	2016		3	28	28	175	176	1	67	4	3	164	M108_04-Mar_5	93.18181818	93.71428571	magic
M108	5	4	3	4-Mar	2016		3	28	28	175	176	1	67	4	4	4	M108_04-Mar_5	2.272727273	2.285714286	magic
M108	5	4	3	4-Mar	2016		3	28	28	175	176	1	67	4	5	0	M108_04-Mar_5	0	0	magic
M123	1	11	11	11-Nov	2016	4/1/2017	13	42	42	139	139	0	251	1	1	0	M123_11-Nov_1	0	0	magic
M123	1	11	11	11-Nov	2016	4/1/2017	13	42	42	139	139	0	251	1	2	121	M123_11-Nov_1	87.05035971	87.05035971	magic
M123	1	11	11	11-Nov	2016	4/1/2017	13	42	42	139	139	0	251	1	3	15	M123_11-Nov_1	10.79136691	10.79136691	magic
M123	1	11	11	11-Nov	2016	4/1/2017	13	42	42	139	139	0	251	1	4	3	M123_11-Nov_1	2.158273381	2.158273381	magic
M123	1a	3	4	3-Apr	2016		4	34	30	175	175	0	248	1	1	0	M123_03-Apr_1a	0	0	magic
M123	1a	3	4	3-Apr	2016		4	34	30	175	175	0	248	1	2	175	M123_03-Apr_1a	100	100	magic
M123	1a	3	4	3-Apr	2016		4	34	30	175	175	0	248	1	3	0	M123_03-Apr_1a	0	0	magic
M123	1b	3	4	3-Apr	2016		4	30	30	184	184	0	249	2	1	0	M123_03-Apr_1b	0	0	magic
M123	1b	3	4	3-Apr	2016		4	30	30	184	184	0	249	2	2	182	M123_03-Apr_1b	98.91304348	98.91304348	magic
M123	1b	3	4	3-Apr	2016		4	30	30	184	184	0	249	2	3	2	M123_03-Apr_1b	1.086956522	1.086956522	magic
M123	2	11	11	11-Nov	2016	4/1/2017	13	42	42	148	148	0	252	2	1	0	M123_11-Nov_2	0	0	magic
M123	2	11	11	11-Nov	2016	4/1/2017	13	42	42	148	148	0	252	2	2	141	M123_11-Nov_2	95.27027027	95.27027027	magic
M123	2	11	11	11-Nov	2016	4/1/2017	13	42	42	148	148	0	252	2	3	7	M123_11-Nov_2	4.72972973	4.72972973	magic
M123	2	11	11	11-Nov	2016	4/1/2017	13	42	42	148	148	0	252	2	4	0	M123_11-Nov_2	0	0	magic
M123	3	11	11	11-Nov	2016	4/1/2017	13	42	42	144	146	2	253	3	1	0	M123_11-Nov_3	0	0	magic
M123	3	11	11	11-Nov	2016	4/1/2017	13	42	42	144	146	2	253	3	2	116	M123_11-Nov_3	79.45205479	80.55555556	magic
M123	3	11	11	11-Nov	2016	4/1/2017	13	42	42	144	146	2	253	3	3	28	M123_11-Nov_3	19.17808219	19.44444444	magic
M123	3	11	11	11-Nov	2016	4/1/2017	13	42	42	144	146	2	253	3	4	0	M123_11-Nov_3	0	0	magic
M123	3b	3	4	3-Apr	2016		4	27	30	180	181	1	250	3	1	0	M123_03-Apr_3b	0	0	magic
M123	3b	3	4	3-Apr	2016		4	27	30	180	181	1	250	3	2	167	M123_03-Apr_3b	92.26519337	92.77777778	magic
M123	3b	3	4	3-Apr	2016		4	27	30	180	181	1	250	3	3	13	M123_03-Apr_3b	7.182320442	7.222222222	magic
M141	1a	30	3	30-Mar	2016		5	33	33	56	173	117	350	2	1	0	M141_30-Mar_1a	0	0	magic
M141	1a	30	3	30-Mar	2016		5	33	33	56	173	117	350	2	2	0	M141_30-Mar_1a	0	0	magic
M141	1a	30	3	30-Mar	2016		5	33	33	56	173	117	350	2	3	3	M141_30-Mar_1a	1.734104046	5.357142857	magic
M141	1a	30	3	30-Mar	2016		5	33	33	56	173	117	350	2	4	5	M141_30-Mar_1a	2.89017341	8.928571429	magic
M141	1a	30	3	30-Mar	2016		5	33	33	56	173	117	350	2	5	7	M141_30-Mar_1a	4.046242775	12.5	magic
M141	1a	30	3	30-Mar	2016		5	33	33	56	173	117	350	2	6	5	M141_30-Mar_1a	2.89017341	8.928571429	magic
M141	1a	30	3	30-Mar	2016		5	33	33	56	173	117	350	2	7	8	M141_30-Mar_1a	4.624277457	14.28571429	magic
M141	1a	30	3	30-Mar	2016		5	33	33	56	173	117	350	2	8	3	M141_30-Mar_1a	1.734104046	5.357142857	magic
M141	1a	30	3	30-Mar	2016		5	33	33	56	173	117	350	2	9	8	M141_30-Mar_1a	4.624277457	14.28571429	magic
M141	1a	30	3	30-Mar	2016		5	33	33	56	173	117	350	2	10	9	M141_30-Mar_1a	5.202312139	16.07142857	magic
M141	1a	30	3	30-Mar	2016		5	33	33	56	173	117	350	2	11	4	M141_30-Mar_1a	2.312138728	7.142857143	magic
M141	1a	30	3	30-Mar	2016		5	33	33	56	173	117	350	2	12	3	M141_30-Mar_1a	1.734104046	5.357142857	magic
M141	1a	30	3	30-Mar	2016		5	33	33	56	173	117	350	2	13	1	M141_30-Mar_1a	0.578034682	1.785714286	magic
M141	1a	30	3	30-Mar	2016		5	33	33	56	173	117	350	2	14	0	M141_30-Mar_1a	0	0	magic
M141	1a	30	3	30-Mar	2016		5	33	33	56	173	117	350	2	15	0	M141_30-Mar_1a	0	0	magic
M141	2a	30	3	30-Mar	2016		5	33	33	85	202	117	351	3	1	0	M141_30-Mar_2a	0	0	magic
M141	2a	30	3	30-Mar	2016		5	33	33	85	202	117	351	3	2	0	M141_30-Mar_2a	0	0	magic
M141	2a	30	3	30-Mar	2016		5	33	33	85	202	117	351	3	3	0	M141_30-Mar_2a	0	0	magic
M141	2a	30	3	30-Mar	2016		5	33	33	85	202	117	351	3	4	4	M141_30-Mar_2a	1.98019802	4.705882353	magic
M141	2a	30	3	30-Mar	2016		5	33	33	85	202	117	351	3	5	3	M141_30-Mar_2a	1.485148515	3.529411765	magic
M141	2a	30	3	30-Mar	2016		5	33	33	85	202	117	351	3	6	7	M141_30-Mar_2a	3.465346535	8.235294118	magic
M141	2a	30	3	30-Mar	2016		5	33	33	85	202	117	351	3	7	7	M141_30-Mar_2a	3.465346535	8.235294118	magic
M141	2a	30	3	30-Mar	2016		5	33	33	85	202	117	351	3	8	10	M141_30-Mar_2a	4.95049505	11.76470588	magic
M141	2a	30	3	30-Mar	2016		5	33	33	85	202	117	351	3	9	24	M141_30-Mar_2a	11.88118812	28.23529412	magic
M141	2a	30	3	30-Mar	2016		5	33	33	85	202	117	351	3	10	16	M141_30-Mar_2a	7.920792079	18.82352941	magic
M141	2a	30	3	30-Mar	2016		5	33	33	85	202	117	351	3	11	9	M141_30-Mar_2a	4.455445545	10.58823529	magic
M141	2a	30	3	30-Mar	2016		5	33	33	85	202	117	351	3	12	4	M141_30-Mar_2a	1.98019802	4.705882353	magic
M141	2a	30	3	30-Mar	2016		5	33	33	85	202	117	351	3	13	0	M141_30-Mar_2a	0	0	magic
M141	2a	30	3	30-Mar	2016		5	33	33	85	202	117	351	3	14	1	M141_30-Mar_2a	0.495049505	1.176470588	magic
M141	2a	30	3	30-Mar	2016		5	33	33	85	202	117	351	3	15	0	M141_30-Mar_2a	0	0	magic
M141	2b	30	3	30-Mar	2016		5	33	33	104	169	65	349	1	1	0	M141_30-Mar_2b	0	0	magic
M141	2b	30	3	30-Mar	2016		5	33	33	104	169	65	349	1	2	0	M141_30-Mar_2b	0	0	magic
M141	2b	30	3	30-Mar	2016		5	33	33	104	169	65	349	1	3	20	M141_30-Mar_2b	11.83431953	19.23076923	magic
M141	2b	30	3	30-Mar	2016		5	33	33	104	169	65	349	1	4	13	M141_30-Mar_2b	7.692307692	12.5	magic
M141	2b	30	3	30-Mar	2016		5	33	33	104	169	65	349	1	5	9	M141_30-Mar_2b	5.325443787	8.653846154	magic
M141	2b	30	3	30-Mar	2016		5	33	33	104	169	65	349	1	6	6	M141_30-Mar_2b	3.550295858	5.769230769	magic
M141	2b	30	3	30-Mar	2016		5	33	33	104	169	65	349	1	7	18	M141_30-Mar_2b	10.65088757	17.30769231	magic
M141	2b	30	3	30-Mar	2016		5	33	33	104	169	65	349	1	8	15	M141_30-Mar_2b	8.875739645	14.42307692	magic
M141	2b	30	3	30-Mar	2016		5	33	33	104	169	65	349	1	9	13	M141_30-Mar_2b	7.692307692	12.5	magic
M141	2b	30	3	30-Mar	2016		5	33	33	104	169	65	349	1	10	5	M141_30-Mar_2b	2.958579882	4.807692308	magic
M141	2b	30	3	30-Mar	2016		5	33	33	104	169	65	349	1	11	3	M141_30-Mar_2b	1.775147929	2.884615385	magic
M141	2b	30	3	30-Mar	2016		5	33	33	104	169	65	349	1	12	1	M141_30-Mar_2b	0.591715976	0.961538462	magic
M141	2b	30	3	30-Mar	2016		5	33	33	104	169	65	349	1	13	0	M141_30-Mar_2b	0	0	magic
M141	2b	30	3	30-Mar	2016		5	33	33	104	169	65	349	1	14	1	M141_30-Mar_2b	0.591715976	0.961538462	magic
M141	2b	30	3	30-Mar	2016		5	33	33	104	169	65	349	1	15	0	M141_30-Mar_2b	0	0	magic
M178	1	20	4	20-Apr	2016		6	34	34	118	153	35	479	7	1	0	M178_20-Apr_1	0	0	magic
M178	1	20	4	20-Apr	2016		6	34	34	118	153	35	479	7	2	2	M178_20-Apr_1	1.307189542	1.694915254	magic
M178	1	20	4	20-Apr	2016		6	34	34	118	153	35	479	7	3	10	M178_20-Apr_1	6.535947712	8.474576271	magic
M178	1	20	4	20-Apr	2016		6	34	34	118	153	35	479	7	4	7	M178_20-Apr_1	4.575163399	5.93220339	magic
M178	1	20	4	20-Apr	2016		6	34	34	118	153	35	479	7	5	5	M178_20-Apr_1	3.267973856	4.237288136	magic
M178	1	20	4	20-Apr	2016		6	34	34	118	153	35	479	7	6	19	M178_20-Apr_1	12.41830065	16.10169492	magic
M178	1	20	4	20-Apr	2016		6	34	34	118	153	35	479	7	7	12	M178_20-Apr_1	7.843137255	10.16949153	magic
M178	1	20	4	20-Apr	2016		6	34	34	118	153	35	479	7	8	7	M178_20-Apr_1	4.575163399	5.93220339	magic
M178	1	20	4	20-Apr	2016		6	34	34	118	153	35	479	7	9	6	M178_20-Apr_1	3.921568627	5.084745763	magic
M178	1	20	4	20-Apr	2016		6	34	34	118	153	35	479	7	10	2	M178_20-Apr_1	1.307189542	1.694915254	magic
M178	1	20	4	20-Apr	2016		6	34	34	118	153	35	479	7	11	1	M178_20-Apr_1	0.653594771	0.847457627	magic
M178	1	20	4	20-Apr	2016		6	34	34	118	153	35	479	7	12	2	M178_20-Apr_1	1.307189542	1.694915254	magic
M178	1	20	4	20-Apr	2016		6	34	34	118	153	35	479	7	13	0	M178_20-Apr_1	0	0	magic
M178	1	20	4	20-Apr	2016		6	34	34	118	153	35	479	7	14	0	M178_20-Apr_1	0	0	magic
M178	1	20	4	20-Apr	2016		6	34	34	118	153	35	479	7	15	0	M178_20-Apr_1	0	0	magic
M178	1	20	4	20-Apr	2016		6	34	34	118	153	35	479	7	16	0	M178_20-Apr_1	0	0	magic
M178	1	20	4	20-Apr	2016		6	34	34	118	153	35	479	7	17	0	M178_20-Apr_1	0	0	magic
M178	1	20	4	20-Apr	2016		6	34	34	118	153	35	479	7	18	0	M178_20-Apr_1	0	0	magic
M178	1	20	4	20-Apr	2016		6	34	34	118	153	35	479	7	19	0	M178_20-Apr_1	0	0	magic
M178	1	20	4	20-Apr	2016		6	34	34	118	153	35	479	7	20	0	M178_20-Apr_1	0	0	magic
M178	1	20	4	20-Apr	2016		6	34	34	118	153	35	479	7	21	1	M178_20-Apr_1	0.653594771	0.847457627	magic
M178	1	20	4	20-Apr	2016		6	34	34	118	153	35	479	7	22	0	M178_20-Apr_1	0	0	magic
M178	1	20	4	20-Apr	2016		6	34	34	118	153	35	479	7	23	1	M178_20-Apr_1	0.653594771	0.847457627	magic
M178	1	20	4	20-Apr	2016		6	34	34	118	153	35	479	7	24	0	M178_20-Apr_1	0	0	magic
M178	1	20	4	20-Apr	2016		6	34	34	118	153	35	479	7	25	0	M178_20-Apr_1	0	0	magic
M178	1	20	4	20-Apr	2016		6	34	34	118	153	35	479	7	26	0	M178_20-Apr_1	0	0	magic
M178	1	20	4	20-Apr	2016		6	34	34	118	153	35	479	7	27	0	M178_20-Apr_1	0	0	magic
M178	1	20	4	20-Apr	2016		6	34	34	118	153	35	479	7	28	0	M178_20-Apr_1	0	0	magic
M178	1	20	4	20-Apr	2016		6	34	34	118	153	35	479	7	29	1	M178_20-Apr_1	0.653594771	0.847457627	magic
M178	1	20	4	20-Apr	2016		6	34	34	118	153	35	479	7	30	0	M178_20-Apr_1	0	0	magic
M178	1	20	4	20-Apr	2016		6	34	34	118	153	35	479	7	31	2	M178_20-Apr_1	1.307189542	1.694915254	magic
M178	1	20	4	20-Apr	2016		6	34	34	118	153	35	479	7	32	1	M178_20-Apr_1	0.653594771	0.847457627	magic
M178	1	20	4	20-Apr	2016		6	34	34	118	153	35	479	7	33	2	M178_20-Apr_1	1.307189542	1.694915254	magic
M178	1	20	4	20-Apr	2016		6	34	34	118	153	35	479	7	34	0	M178_20-Apr_1	0	0	magic
M178	1	20	4	20-Apr	2016		6	34	34	118	153	35	479	7	35	2	M178_20-Apr_1	1.307189542	1.694915254	magic
M178	1	20	4	20-Apr	2016		6	34	34	118	153	35	479	7	36	4	M178_20-Apr_1	2.614379085	3.389830508	magic
M178	1	20	4	20-Apr	2016		6	34	34	118	153	35	479	7	37	3	M178_20-Apr_1	1.960784314	2.542372881	magic
M178	1	20	4	20-Apr	2016		6	34	34	118	153	35	479	7	38	6	M178_20-Apr_1	3.921568627	5.084745763	magic
M178	1	20	4	20-Apr	2016		6	34	34	118	153	35	479	7	39	4	M178_20-Apr_1	2.614379085	3.389830508	magic
M178	1	20	4	20-Apr	2016		6	34	34	118	153	35	479	7	40	3	M178_20-Apr_1	1.960784314	2.542372881	magic
M178	1	20	4	20-Apr	2016		6	34	34	118	153	35	479	7	41	3	M178_20-Apr_1	1.960784314	2.542372881	magic
M178	1	20	4	20-Apr	2016		6	34	34	118	153	35	479	7	42	5	M178_20-Apr_1	3.267973856	4.237288136	magic
M178	1	20	4	20-Apr	2016		6	34	34	118	153	35	479	7	43	0	M178_20-Apr_1	0	0	magic
M178	1	20	4	20-Apr	2016		6	34	34	118	153	35	479	7	44	4	M178_20-Apr_1	2.614379085	3.389830508	magic
M178	1	20	4	20-Apr	2016		6	34	34	118	153	35	479	7	45	1	M178_20-Apr_1	0.653594771	0.847457627	magic
M178	1	20	4	20-Apr	2016		6	34	34	118	153	35	479	7	46	1	M178_20-Apr_1	0.653594771	0.847457627	magic
M178	1	20	4	20-Apr	2016		6	34	34	118	153	35	479	7	47	0	M178_20-Apr_1	0	0	magic
M178	1	20	4	20-Apr	2016		6	34	34	118	153	35	479	7	48	1	M178_20-Apr_1	0.653594771	0.847457627	magic
M178	1	20	4	20-Apr	2016		6	34	34	118	153	35	479	7	49	0	M178_20-Apr_1	0	0	magic
M178	1	20	4	20-Apr	2016		6	34	34	118	153	35	479	7	50	0	M178_20-Apr_1	0	0	magic
M178	1	20	4	20-Apr	2016		6	34	34	118	153	35	479	7	51	0	M178_20-Apr_1	0	0	magic
M178	2	20	4	20-Apr	2016		6	34	34	163	173	10	478	6	1	0	M178_20-Apr_2	0	0	magic
M178	2	20	4	20-Apr	2016		6	34	34	163	173	10	478	6	2	7	M178_20-Apr_2	4.046242775	4.294478528	magic
M178	2	20	4	20-Apr	2016		6	34	34	163	173	10	478	6	3	12	M178_20-Apr_2	6.936416185	7.36196319	magic
M178	2	20	4	20-Apr	2016		6	34	34	163	173	10	478	6	4	15	M178_20-Apr_2	8.670520231	9.202453988	magic
M178	2	20	4	20-Apr	2016		6	34	34	163	173	10	478	6	5	15	M178_20-Apr_2	8.670520231	9.202453988	magic
M178	2	20	4	20-Apr	2016		6	34	34	163	173	10	478	6	6	26	M178_20-Apr_2	15.02890173	15.95092025	magic
M178	2	20	4	20-Apr	2016		6	34	34	163	173	10	478	6	7	26	M178_20-Apr_2	15.02890173	15.95092025	magic
M178	2	20	4	20-Apr	2016		6	34	34	163	173	10	478	6	8	21	M178_20-Apr_2	12.13872832	12.88343558	magic
M178	2	20	4	20-Apr	2016		6	34	34	163	173	10	478	6	9	7	M178_20-Apr_2	4.046242775	4.294478528	magic
M178	2	20	4	20-Apr	2016		6	34	34	163	173	10	478	6	10	8	M178_20-Apr_2	4.624277457	4.90797546	magic
M178	2	20	4	20-Apr	2016		6	34	34	163	173	10	478	6	11	0	M178_20-Apr_2	0	0	magic
M178	2	20	4	20-Apr	2016		6	34	34	163	173	10	478	6	12	0	M178_20-Apr_2	0	0	magic
M178	2	20	4	20-Apr	2016		6	34	34	163	173	10	478	6	13	0	M178_20-Apr_2	0	0	magic
M178	2	20	4	20-Apr	2016		6	34	34	163	173	10	478	6	14	0	M178_20-Apr_2	0	0	magic
M178	2	20	4	20-Apr	2016		6	34	34	163	173	10	478	6	15	0	M178_20-Apr_2	0	0	magic
M178	2	20	4	20-Apr	2016		6	34	34	163	173	10	478	6	16	0	M178_20-Apr_2	0	0	magic
M178	2	20	4	20-Apr	2016		6	34	34	163	173	10	478	6	17	0	M178_20-Apr_2	0	0	magic
M178	2	20	4	20-Apr	2016		6	34	34	163	173	10	478	6	18	0	M178_20-Apr_2	0	0	magic
M178	2	20	4	20-Apr	2016		6	34	34	163	173	10	478	6	19	0	M178_20-Apr_2	0	0	magic
M178	2	20	4	20-Apr	2016		6	34	34	163	173	10	478	6	20	0	M178_20-Apr_2	0	0	magic
M178	2	20	4	20-Apr	2016		6	34	34	163	173	10	478	6	21	0	M178_20-Apr_2	0	0	magic
M178	2	20	4	20-Apr	2016		6	34	34	163	173	10	478	6	22	1	M178_20-Apr_2	0.578034682	0.613496933	magic
M178	2	20	4	20-Apr	2016		6	34	34	163	173	10	478	6	23	0	M178_20-Apr_2	0	0	magic
M178	2	20	4	20-Apr	2016		6	34	34	163	173	10	478	6	24	0	M178_20-Apr_2	0	0	magic
M178	2	20	4	20-Apr	2016		6	34	34	163	173	10	478	6	25	0	M178_20-Apr_2	0	0	magic
M178	2	20	4	20-Apr	2016		6	34	34	163	173	10	478	6	26	0	M178_20-Apr_2	0	0	magic
M178	2	20	4	20-Apr	2016		6	34	34	163	173	10	478	6	27	0	M178_20-Apr_2	0	0	magic
M178	2	20	4	20-Apr	2016		6	34	34	163	173	10	478	6	28	0	M178_20-Apr_2	0	0	magic
M178	2	20	4	20-Apr	2016		6	34	34	163	173	10	478	6	29	0	M178_20-Apr_2	0	0	magic
M178	2	20	4	20-Apr	2016		6	34	34	163	173	10	478	6	30	0	M178_20-Apr_2	0	0	magic
M178	2	20	4	20-Apr	2016		6	34	34	163	173	10	478	6	31	0	M178_20-Apr_2	0	0	magic
M178	2	20	4	20-Apr	2016		6	34	34	163	173	10	478	6	32	0	M178_20-Apr_2	0	0	magic
M178	2	20	4	20-Apr	2016		6	34	34	163	173	10	478	6	33	0	M178_20-Apr_2	0	0	magic
M178	2	20	4	20-Apr	2016		6	34	34	163	173	10	478	6	34	0	M178_20-Apr_2	0	0	magic
M178	2	20	4	20-Apr	2016		6	34	34	163	173	10	478	6	35	0	M178_20-Apr_2	0	0	magic
M178	2	20	4	20-Apr	2016		6	34	34	163	173	10	478	6	36	0	M178_20-Apr_2	0	0	magic
M178	2	20	4	20-Apr	2016		6	34	34	163	173	10	478	6	37	0	M178_20-Apr_2	0	0	magic
M178	2	20	4	20-Apr	2016		6	34	34	163	173	10	478	6	38	0	M178_20-Apr_2	0	0	magic
M178	2	20	4	20-Apr	2016		6	34	34	163	173	10	478	6	39	0	M178_20-Apr_2	0	0	magic
M178	2	20	4	20-Apr	2016		6	34	34	163	173	10	478	6	40	0	M178_20-Apr_2	0	0	magic
M178	2	20	4	20-Apr	2016		6	34	34	163	173	10	478	6	41	0	M178_20-Apr_2	0	0	magic
M178	2	20	4	20-Apr	2016		6	34	34	163	173	10	478	6	42	0	M178_20-Apr_2	0	0	magic
M178	2	20	4	20-Apr	2016		6	34	34	163	173	10	478	6	43	0	M178_20-Apr_2	0	0	magic
M178	2	20	4	20-Apr	2016		6	34	34	163	173	10	478	6	44	0	M178_20-Apr_2	0	0	magic
M178	2	20	4	20-Apr	2016		6	34	34	163	173	10	478	6	45	10	M178_20-Apr_2	5.780346821	6.134969325	magic
M178	2	20	4	20-Apr	2016		6	34	34	163	173	10	478	6	46	5	M178_20-Apr_2	2.89017341	3.067484663	magic
M178	2	20	4	20-Apr	2016		6	34	34	163	173	10	478	6	47	0	M178_20-Apr_2	0	0	magic
M178	2	20	4	20-Apr	2016		6	34	34	163	173	10	478	6	48	4	M178_20-Apr_2	2.312138728	2.45398773	magic
M178	2	20	4	20-Apr	2016		6	34	34	163	173	10	478	6	49	1	M178_20-Apr_2	0.578034682	0.613496933	magic
M178	2	20	4	20-Apr	2016		6	34	34	163	173	10	478	6	50	5	M178_20-Apr_2	2.89017341	3.067484663	magic
M178	2	20	4	20-Apr	2016		6	34	34	163	173	10	478	6	51	0	M178_20-Apr_2	0	0	magic
M178	2B	19	4	19-Apr	2016		6	33	34	144	145	1	475	3	1	0	M178_19-Apr_2B	0	0	magic
M178	2B	19	4	19-Apr	2016		6	33	34	144	145	1	475	3	2	4	M178_19-Apr_2B	2.75862069	2.777777778	magic
M178	2B	19	4	19-Apr	2016		6	33	34	144	145	1	475	3	3	25	M178_19-Apr_2B	17.24137931	17.36111111	magic
M178	2B	19	4	19-Apr	2016		6	33	34	144	145	1	475	3	4	39	M178_19-Apr_2B	26.89655172	27.08333333	magic
M178	2B	19	4	19-Apr	2016		6	33	34	144	145	1	475	3	5	22	M178_19-Apr_2B	15.17241379	15.27777778	magic
M178	2B	19	4	19-Apr	2016		6	33	34	144	145	1	475	3	6	15	M178_19-Apr_2B	10.34482759	10.41666667	magic
M178	2B	19	4	19-Apr	2016		6	33	34	144	145	1	475	3	7	10	M178_19-Apr_2B	6.896551724	6.944444444	magic
M178	2B	19	4	19-Apr	2016		6	33	34	144	145	1	475	3	8	8	M178_19-Apr_2B	5.517241379	5.555555556	magic
M178	2B	19	4	19-Apr	2016		6	33	34	144	145	1	475	3	9	2	M178_19-Apr_2B	1.379310345	1.388888889	magic
M178	2B	19	4	19-Apr	2016		6	33	34	144	145	1	475	3	10	1	M178_19-Apr_2B	0.689655172	0.694444444	magic
M178	2B	19	4	19-Apr	2016		6	33	34	144	145	1	475	3	11	0	M178_19-Apr_2B	0	0	magic
M178	2B	19	4	19-Apr	2016		6	33	34	144	145	1	475	3	12	0	M178_19-Apr_2B	0	0	magic
M178	2B	19	4	19-Apr	2016		6	33	34	144	145	1	475	3	13	0	M178_19-Apr_2B	0	0	magic
M178	2B	19	4	19-Apr	2016		6	33	34	144	145	1	475	3	14	0	M178_19-Apr_2B	0	0	magic
M178	2B	19	4	19-Apr	2016		6	33	34	144	145	1	475	3	15	0	M178_19-Apr_2B	0	0	magic
M178	2B	19	4	19-Apr	2016		6	33	34	144	145	1	475	3	16	0	M178_19-Apr_2B	0	0	magic
M178	2B	19	4	19-Apr	2016		6	33	34	144	145	1	475	3	17	0	M178_19-Apr_2B	0	0	magic
M178	2B	19	4	19-Apr	2016		6	33	34	144	145	1	475	3	18	0	M178_19-Apr_2B	0	0	magic
M178	2B	19	4	19-Apr	2016		6	33	34	144	145	1	475	3	19	0	M178_19-Apr_2B	0	0	magic
M178	2B	19	4	19-Apr	2016		6	33	34	144	145	1	475	3	20	0	M178_19-Apr_2B	0	0	magic
M178	2B	19	4	19-Apr	2016		6	33	34	144	145	1	475	3	21	0	M178_19-Apr_2B	0	0	magic
M178	2B	19	4	19-Apr	2016		6	33	34	144	145	1	475	3	22	0	M178_19-Apr_2B	0	0	magic
M178	2B	19	4	19-Apr	2016		6	33	34	144	145	1	475	3	23	0	M178_19-Apr_2B	0	0	magic
M178	2B	19	4	19-Apr	2016		6	33	34	144	145	1	475	3	24	0	M178_19-Apr_2B	0	0	magic
M178	2B	19	4	19-Apr	2016		6	33	34	144	145	1	475	3	25	0	M178_19-Apr_2B	0	0	magic
M178	2B	19	4	19-Apr	2016		6	33	34	144	145	1	475	3	26	0	M178_19-Apr_2B	0	0	magic
M178	2B	19	4	19-Apr	2016		6	33	34	144	145	1	475	3	27	0	M178_19-Apr_2B	0	0	magic
M178	2B	19	4	19-Apr	2016		6	33	34	144	145	1	475	3	28	0	M178_19-Apr_2B	0	0	magic
M178	2B	19	4	19-Apr	2016		6	33	34	144	145	1	475	3	29	2	M178_19-Apr_2B	1.379310345	1.388888889	magic
M178	2B	19	4	19-Apr	2016		6	33	34	144	145	1	475	3	30	2	M178_19-Apr_2B	1.379310345	1.388888889	magic
M178	2B	19	4	19-Apr	2016		6	33	34	144	145	1	475	3	31	2	M178_19-Apr_2B	1.379310345	1.388888889	magic
M178	2B	19	4	19-Apr	2016		6	33	34	144	145	1	475	3	32	1	M178_19-Apr_2B	0.689655172	0.694444444	magic
M178	2B	19	4	19-Apr	2016		6	33	34	144	145	1	475	3	33	2	M178_19-Apr_2B	1.379310345	1.388888889	magic
M178	2B	19	4	19-Apr	2016		6	33	34	144	145	1	475	3	34	0	M178_19-Apr_2B	0	0	magic
M178	2B	19	4	19-Apr	2016		6	33	34	144	145	1	475	3	35	0	M178_19-Apr_2B	0	0	magic
M178	2B	19	4	19-Apr	2016		6	33	34	144	145	1	475	3	36	1	M178_19-Apr_2B	0.689655172	0.694444444	magic
M178	2B	19	4	19-Apr	2016		6	33	34	144	145	1	475	3	37	0	M178_19-Apr_2B	0	0	magic
M178	2B	19	4	19-Apr	2016		6	33	34	144	145	1	475	3	38	0	M178_19-Apr_2B	0	0	magic
M178	2B	19	4	19-Apr	2016		6	33	34	144	145	1	475	3	39	0	M178_19-Apr_2B	0	0	magic
M178	2B	19	4	19-Apr	2016		6	33	34	144	145	1	475	3	40	1	M178_19-Apr_2B	0.689655172	0.694444444	magic
M178	2B	19	4	19-Apr	2016		6	33	34	144	145	1	475	3	41	0	M178_19-Apr_2B	0	0	magic
M178	2B	19	4	19-Apr	2016		6	33	34	144	145	1	475	3	42	1	M178_19-Apr_2B	0.689655172	0.694444444	magic
M178	2B	19	4	19-Apr	2016		6	33	34	144	145	1	475	3	43	0	M178_19-Apr_2B	0	0	magic
M178	2B	19	4	19-Apr	2016		6	33	34	144	145	1	475	3	44	1	M178_19-Apr_2B	0.689655172	0.694444444	magic
M178	2B	19	4	19-Apr	2016		6	33	34	144	145	1	475	3	45	1	M178_19-Apr_2B	0.689655172	0.694444444	magic
M178	2B	19	4	19-Apr	2016		6	33	34	144	145	1	475	3	46	0	M178_19-Apr_2B	0	0	magic
M178	2B	19	4	19-Apr	2016		6	33	34	144	145	1	475	3	47	2	M178_19-Apr_2B	1.379310345	1.388888889	magic
M178	2B	19	4	19-Apr	2016		6	33	34	144	145	1	475	3	48	0	M178_19-Apr_2B	0	0	magic
M178	2B	19	4	19-Apr	2016		6	33	34	144	145	1	475	3	49	2	M178_19-Apr_2B	1.379310345	1.388888889	magic
M178	2B	19	4	19-Apr	2016		6	33	34	144	145	1	475	3	50	0	M178_19-Apr_2B	0	0	magic
M178	2B	19	4	19-Apr	2016		6	33	34	144	145	1	475	3	51	0	M178_19-Apr_2B	0	0	magic
M178	3	14	4	13-Apr	2016		6	30	34	99	182	83	473	1	1	0	M178_13-Apr_3	0	0	magic
M178	3	14	4	13-Apr	2016		6	30	34	99	182	83	473	1	2	0	M178_13-Apr_3	0	0	magic
M178	3	14	4	13-Apr	2016		6	30	34	99	182	83	473	1	3	12	M178_13-Apr_3	6.593406593	12.12121212	magic
M178	3	14	4	13-Apr	2016		6	30	34	99	182	83	473	1	4	47	M178_13-Apr_3	25.82417582	47.47474747	magic
M178	3	14	4	13-Apr	2016		6	30	34	99	182	83	473	1	5	11	M178_13-Apr_3	6.043956044	11.11111111	magic
M178	3	14	4	13-Apr	2016		6	30	34	99	182	83	473	1	6	17	M178_13-Apr_3	9.340659341	17.17171717	magic
M178	3	14	4	13-Apr	2016		6	30	34	99	182	83	473	1	7	10	M178_13-Apr_3	5.494505495	10.1010101	magic
M178	3	14	4	13-Apr	2016		6	30	34	99	182	83	473	1	8	1	M178_13-Apr_3	0.549450549	1.01010101	magic
M178	3	14	4	13-Apr	2016		6	30	34	99	182	83	473	1	9	0	M178_13-Apr_3	0	0	magic
M178	3	14	4	13-Apr	2016		6	30	34	99	182	83	473	1	10	0	M178_13-Apr_3	0	0	magic
M178	3	14	4	13-Apr	2016		6	30	34	99	182	83	473	1	11	0	M178_13-Apr_3	0	0	magic
M178	3	14	4	13-Apr	2016		6	30	34	99	182	83	473	1	12	0	M178_13-Apr_3	0	0	magic
M178	3	14	4	13-Apr	2016		6	30	34	99	182	83	473	1	13	0	M178_13-Apr_3	0	0	magic
M178	3	14	4	13-Apr	2016		6	30	34	99	182	83	473	1	14	1	M178_13-Apr_3	0.549450549	1.01010101	magic
M178	3	14	4	13-Apr	2016		6	30	34	99	182	83	473	1	15	0	M178_13-Apr_3	0	0	magic
M178	3	14	4	13-Apr	2016		6	30	34	99	182	83	473	1	16	0	M178_13-Apr_3	0	0	magic
M178	3	14	4	13-Apr	2016		6	30	34	99	182	83	473	1	17	0	M178_13-Apr_3	0	0	magic
M178	3	14	4	13-Apr	2016		6	30	34	99	182	83	473	1	18	0	M178_13-Apr_3	0	0	magic
M178	3	14	4	13-Apr	2016		6	30	34	99	182	83	473	1	19	0	M178_13-Apr_3	0	0	magic
M178	3	14	4	13-Apr	2016		6	30	34	99	182	83	473	1	20	0	M178_13-Apr_3	0	0	magic
M178	3	14	4	13-Apr	2016		6	30	34	99	182	83	473	1	21	0	M178_13-Apr_3	0	0	magic
M178	3	14	4	13-Apr	2016		6	30	34	99	182	83	473	1	22	0	M178_13-Apr_3	0	0	magic
M178	3	14	4	13-Apr	2016		6	30	34	99	182	83	473	1	23	0	M178_13-Apr_3	0	0	magic
M178	3	14	4	13-Apr	2016		6	30	34	99	182	83	473	1	24	0	M178_13-Apr_3	0	0	magic
M178	4	19	4	19-Apr	2016		6	34	34	128	138	10	476	4	1	0	M178_19-Apr_4	0	0	magic
M178	4	19	4	19-Apr	2016		6	34	34	128	138	10	476	4	2	0	M178_19-Apr_4	0	0	magic
M178	4	19	4	19-Apr	2016		6	34	34	128	138	10	476	4	3	8	M178_19-Apr_4	5.797101449	6.25	magic
M178	4	19	4	19-Apr	2016		6	34	34	128	138	10	476	4	4	10	M178_19-Apr_4	7.246376812	7.8125	magic
M178	4	19	4	19-Apr	2016		6	34	34	128	138	10	476	4	5	12	M178_19-Apr_4	8.695652174	9.375	magic
M178	4	19	4	19-Apr	2016		6	34	34	128	138	10	476	4	6	15	M178_19-Apr_4	10.86956522	11.71875	magic
M178	4	19	4	19-Apr	2016		6	34	34	128	138	10	476	4	7	20	M178_19-Apr_4	14.49275362	15.625	magic
M178	4	19	4	19-Apr	2016		6	34	34	128	138	10	476	4	8	9	M178_19-Apr_4	6.52173913	7.03125	magic
M178	4	19	4	19-Apr	2016		6	34	34	128	138	10	476	4	9	11	M178_19-Apr_4	7.971014493	8.59375	magic
M178	4	19	4	19-Apr	2016		6	34	34	128	138	10	476	4	10	7	M178_19-Apr_4	5.072463768	5.46875	magic
M178	4	19	4	19-Apr	2016		6	34	34	128	138	10	476	4	11	1	M178_19-Apr_4	0.724637681	0.78125	magic
M178	4	19	4	19-Apr	2016		6	34	34	128	138	10	476	4	12	1	M178_19-Apr_4	0.724637681	0.78125	magic
M178	4	19	4	19-Apr	2016		6	34	34	128	138	10	476	4	13	1	M178_19-Apr_4	0.724637681	0.78125	magic
M178	4	19	4	19-Apr	2016		6	34	34	128	138	10	476	4	14	0	M178_19-Apr_4	0	0	magic
M178	4	19	4	19-Apr	2016		6	34	34	128	138	10	476	4	15	0	M178_19-Apr_4	0	0	magic
M178	4	19	4	19-Apr	2016		6	34	34	128	138	10	476	4	16	0	M178_19-Apr_4	0	0	magic
M178	4	19	4	19-Apr	2016		6	34	34	128	138	10	476	4	17	0	M178_19-Apr_4	0	0	magic
M178	4	19	4	19-Apr	2016		6	34	34	128	138	10	476	4	18	0	M178_19-Apr_4	0	0	magic
M178	4	19	4	19-Apr	2016		6	34	34	128	138	10	476	4	19	0	M178_19-Apr_4	0	0	magic
M178	4	19	4	19-Apr	2016		6	34	34	128	138	10	476	4	20	0	M178_19-Apr_4	0	0	magic
M178	4	19	4	19-Apr	2016		6	34	34	128	138	10	476	4	21	0	M178_19-Apr_4	0	0	magic
M178	4	19	4	19-Apr	2016		6	34	34	128	138	10	476	4	22	1	M178_19-Apr_4	0.724637681	0.78125	magic
M178	4	19	4	19-Apr	2016		6	34	34	128	138	10	476	4	23	2	M178_19-Apr_4	1.449275362	1.5625	magic
M178	4	19	4	19-Apr	2016		6	34	34	128	138	10	476	4	24	1	M178_19-Apr_4	0.724637681	0.78125	magic
M178	4	19	4	19-Apr	2016		6	34	34	128	138	10	476	4	25	0	M178_19-Apr_4	0	0	magic
M178	4	19	4	19-Apr	2016		6	34	34	128	138	10	476	4	26	0	M178_19-Apr_4	0	0	magic
M178	4	19	4	19-Apr	2016		6	34	34	128	138	10	476	4	27	0	M178_19-Apr_4	0	0	magic
M178	4	19	4	19-Apr	2016		6	34	34	128	138	10	476	4	28	0	M178_19-Apr_4	0	0	magic
M178	4	19	4	19-Apr	2016		6	34	34	128	138	10	476	4	29	0	M178_19-Apr_4	0	0	magic
M178	4	19	4	19-Apr	2016		6	34	34	128	138	10	476	4	30	0	M178_19-Apr_4	0	0	magic
M178	4	19	4	19-Apr	2016		6	34	34	128	138	10	476	4	31	0	M178_19-Apr_4	0	0	magic
M178	4	19	4	19-Apr	2016		6	34	34	128	138	10	476	4	32	0	M178_19-Apr_4	0	0	magic
M178	4	19	4	19-Apr	2016		6	34	34	128	138	10	476	4	33	1	M178_19-Apr_4	0.724637681	0.78125	magic
M178	4	19	4	19-Apr	2016		6	34	34	128	138	10	476	4	34	0	M178_19-Apr_4	0	0	magic
M178	4	19	4	19-Apr	2016		6	34	34	128	138	10	476	4	35	1	M178_19-Apr_4	0.724637681	0.78125	magic
M178	4	19	4	19-Apr	2016		6	34	34	128	138	10	476	4	36	1	M178_19-Apr_4	0.724637681	0.78125	magic
M178	4	19	4	19-Apr	2016		6	34	34	128	138	10	476	4	37	7	M178_19-Apr_4	5.072463768	5.46875	magic
M178	4	19	4	19-Apr	2016		6	34	34	128	138	10	476	4	38	4	M178_19-Apr_4	2.898550725	3.125	magic
M178	4	19	4	19-Apr	2016		6	34	34	128	138	10	476	4	39	3	M178_19-Apr_4	2.173913043	2.34375	magic
M178	4	19	4	19-Apr	2016		6	34	34	128	138	10	476	4	40	2	M178_19-Apr_4	1.449275362	1.5625	magic
M178	4	19	4	19-Apr	2016		6	34	34	128	138	10	476	4	41	0	M178_19-Apr_4	0	0	magic
M178	4	19	4	19-Apr	2016		6	34	34	128	138	10	476	4	42	0	M178_19-Apr_4	0	0	magic
M178	4	19	4	19-Apr	2016		6	34	34	128	138	10	476	4	43	1	M178_19-Apr_4	0.724637681	0.78125	magic
M178	4	19	4	19-Apr	2016		6	34	34	128	138	10	476	4	44	2	M178_19-Apr_4	1.449275362	1.5625	magic
M178	4	19	4	19-Apr	2016		6	34	34	128	138	10	476	4	45	1	M178_19-Apr_4	0.724637681	0.78125	magic
M178	4	19	4	19-Apr	2016		6	34	34	128	138	10	476	4	46	0	M178_19-Apr_4	0	0	magic
M178	4	19	4	19-Apr	2016		6	34	34	128	138	10	476	4	47	0	M178_19-Apr_4	0	0	magic
M178	4	19	4	19-Apr	2016		6	34	34	128	138	10	476	4	48	2	M178_19-Apr_4	1.449275362	1.5625	magic
M178	4	19	4	19-Apr	2016		6	34	34	128	138	10	476	4	49	1	M178_19-Apr_4	0.724637681	0.78125	magic
M178	4	19	4	19-Apr	2016		6	34	34	128	138	10	476	4	50	2	M178_19-Apr_4	1.449275362	1.5625	magic
M178	4	19	4	19-Apr	2016		6	34	34	128	138	10	476	4	51	1	M178_19-Apr_4	0.724637681	0.78125	magic
M178	5	14	4	13-Apr	2016		6	33	34	62	150	88	474	2	1	0	M178_13-Apr_5	0	0	magic
M178	5	14	4	13-Apr	2016		6	33	34	62	150	88	474	2	2	0	M178_13-Apr_5	0	0	magic
M178	5	14	4	13-Apr	2016		6	33	34	62	150	88	474	2	3	7	M178_13-Apr_5	4.666666667	11.29032258	magic
M178	5	14	4	13-Apr	2016		6	33	34	62	150	88	474	2	4	18	M178_13-Apr_5	12	29.03225806	magic
M178	5	14	4	13-Apr	2016		6	33	34	62	150	88	474	2	5	15	M178_13-Apr_5	10	24.19354839	magic
M178	5	14	4	13-Apr	2016		6	33	34	62	150	88	474	2	6	11	M178_13-Apr_5	7.333333333	17.74193548	magic
M178	5	14	4	13-Apr	2016		6	33	34	62	150	88	474	2	7	8	M178_13-Apr_5	5.333333333	12.90322581	magic
M178	5	14	4	13-Apr	2016		6	33	34	62	150	88	474	2	8	2	M178_13-Apr_5	1.333333333	3.225806452	magic
M178	5	14	4	13-Apr	2016		6	33	34	62	150	88	474	2	9	1	M178_13-Apr_5	0.666666667	1.612903226	magic
M178	5	14	4	13-Apr	2016		6	33	34	62	150	88	474	2	10	0	M178_13-Apr_5	0	0	magic
M178	5	14	4	13-Apr	2016		6	33	34	62	150	88	474	2	11	0	M178_13-Apr_5	0	0	magic
M178	5	14	4	13-Apr	2016		6	33	34	62	150	88	474	2	12	0	M178_13-Apr_5	0	0	magic
M178	5	14	4	13-Apr	2016		6	33	34	62	150	88	474	2	13	0	M178_13-Apr_5	0	0	magic
M178	5	14	4	13-Apr	2016		6	33	34	62	150	88	474	2	14	0	M178_13-Apr_5	0	0	magic
M178	5	14	4	13-Apr	2016		6	33	34	62	150	88	474	2	15	0	M178_13-Apr_5	0	0	magic
M178	5	14	4	13-Apr	2016		6	33	34	62	150	88	474	2	16	0	M178_13-Apr_5	0	0	magic
M178	5	14	4	13-Apr	2016		6	33	34	62	150	88	474	2	17	0	M178_13-Apr_5	0	0	magic
M178	5	14	4	13-Apr	2016		6	33	34	62	150	88	474	2	18	0	M178_13-Apr_5	0	0	magic
M178	5	14	4	13-Apr	2016		6	33	34	62	150	88	474	2	19	0	M178_13-Apr_5	0	0	magic
M178	5	14	4	13-Apr	2016		6	33	34	62	150	88	474	2	20	0	M178_13-Apr_5	0	0	magic
M178	5	14	4	13-Apr	2016		6	33	34	62	150	88	474	2	21	0	M178_13-Apr_5	0	0	magic
M178	5	14	4	13-Apr	2016		6	33	34	62	150	88	474	2	22	0	M178_13-Apr_5	0	0	magic
M178	5	14	4	13-Apr	2016		6	33	34	62	150	88	474	2	23	0	M178_13-Apr_5	0	0	magic
M178	5	14	4	13-Apr	2016		6	33	34	62	150	88	474	2	24	1	M178_13-Apr_5	0.666666667	1.612903226	magic
M178	6	19	4	19-Apr	2016		6	33	34	119	140	21	477	5	1	0	M178_19-Apr_6	0	0	magic
M178	6	19	4	19-Apr	2016		6	33	34	119	140	21	477	5	2	0	M178_19-Apr_6	0	0	magic
M178	6	19	4	19-Apr	2016		6	33	34	119	140	21	477	5	3	8	M178_19-Apr_6	5.714285714	6.722689076	magic
M178	6	19	4	19-Apr	2016		6	33	34	119	140	21	477	5	4	17	M178_19-Apr_6	12.14285714	14.28571429	magic
M178	6	19	4	19-Apr	2016		6	33	34	119	140	21	477	5	5	14	M178_19-Apr_6	10	11.76470588	magic
M178	6	19	4	19-Apr	2016		6	33	34	119	140	21	477	5	6	20	M178_19-Apr_6	14.28571429	16.80672269	magic
M178	6	19	4	19-Apr	2016		6	33	34	119	140	21	477	5	7	16	M178_19-Apr_6	11.42857143	13.44537815	magic
M178	6	19	4	19-Apr	2016		6	33	34	119	140	21	477	5	8	10	M178_19-Apr_6	7.142857143	8.403361345	magic
M178	6	19	4	19-Apr	2016		6	33	34	119	140	21	477	5	9	2	M178_19-Apr_6	1.428571429	1.680672269	magic
M178	6	19	4	19-Apr	2016		6	33	34	119	140	21	477	5	10	4	M178_19-Apr_6	2.857142857	3.361344538	magic
M178	6	19	4	19-Apr	2016		6	33	34	119	140	21	477	5	11	1	M178_19-Apr_6	0.714285714	0.840336134	magic
M178	6	19	4	19-Apr	2016		6	33	34	119	140	21	477	5	12	0	M178_19-Apr_6	0	0	magic
M178	6	19	4	19-Apr	2016		6	33	34	119	140	21	477	5	13	0	M178_19-Apr_6	0	0	magic
M178	6	19	4	19-Apr	2016		6	33	34	119	140	21	477	5	14	0	M178_19-Apr_6	0	0	magic
M178	6	19	4	19-Apr	2016		6	33	34	119	140	21	477	5	15	0	M178_19-Apr_6	0	0	magic
M178	6	19	4	19-Apr	2016		6	33	34	119	140	21	477	5	16	0	M178_19-Apr_6	0	0	magic
M178	6	19	4	19-Apr	2016		6	33	34	119	140	21	477	5	17	0	M178_19-Apr_6	0	0	magic
M178	6	19	4	19-Apr	2016		6	33	34	119	140	21	477	5	18	0	M178_19-Apr_6	0	0	magic
M178	6	19	4	19-Apr	2016		6	33	34	119	140	21	477	5	19	0	M178_19-Apr_6	0	0	magic
M178	6	19	4	19-Apr	2016		6	33	34	119	140	21	477	5	20	0	M178_19-Apr_6	0	0	magic
M178	6	19	4	19-Apr	2016		6	33	34	119	140	21	477	5	21	0	M178_19-Apr_6	0	0	magic
M178	6	19	4	19-Apr	2016		6	33	34	119	140	21	477	5	22	0	M178_19-Apr_6	0	0	magic
M178	6	19	4	19-Apr	2016		6	33	34	119	140	21	477	5	23	0	M178_19-Apr_6	0	0	magic
M178	6	19	4	19-Apr	2016		6	33	34	119	140	21	477	5	24	0	M178_19-Apr_6	0	0	magic
M178	6	19	4	19-Apr	2016		6	33	34	119	140	21	477	5	25	0	M178_19-Apr_6	0	0	magic
M178	6	19	4	19-Apr	2016		6	33	34	119	140	21	477	5	26	0	M178_19-Apr_6	0	0	magic
M178	6	19	4	19-Apr	2016		6	33	34	119	140	21	477	5	27	0	M178_19-Apr_6	0	0	magic
M178	6	19	4	19-Apr	2016		6	33	34	119	140	21	477	5	28	0	M178_19-Apr_6	0	0	magic
M178	6	19	4	19-Apr	2016		6	33	34	119	140	21	477	5	29	0	M178_19-Apr_6	0	0	magic
M178	6	19	4	19-Apr	2016		6	33	34	119	140	21	477	5	30	0	M178_19-Apr_6	0	0	magic
M178	6	19	4	19-Apr	2016		6	33	34	119	140	21	477	5	31	0	M178_19-Apr_6	0	0	magic
M178	6	19	4	19-Apr	2016		6	33	34	119	140	21	477	5	32	0	M178_19-Apr_6	0	0	magic
M178	6	19	4	19-Apr	2016		6	33	34	119	140	21	477	5	33	0	M178_19-Apr_6	0	0	magic
M178	6	19	4	19-Apr	2016		6	33	34	119	140	21	477	5	34	0	M178_19-Apr_6	0	0	magic
M178	6	19	4	19-Apr	2016		6	33	34	119	140	21	477	5	35	1	M178_19-Apr_6	0.714285714	0.840336134	magic
M178	6	19	4	19-Apr	2016		6	33	34	119	140	21	477	5	36	0	M178_19-Apr_6	0	0	magic
M178	6	19	4	19-Apr	2016		6	33	34	119	140	21	477	5	37	0	M178_19-Apr_6	0	0	magic
M178	6	19	4	19-Apr	2016		6	33	34	119	140	21	477	5	38	0	M178_19-Apr_6	0	0	magic
M178	6	19	4	19-Apr	2016		6	33	34	119	140	21	477	5	39	0	M178_19-Apr_6	0	0	magic
M178	6	19	4	19-Apr	2016		6	33	34	119	140	21	477	5	40	0	M178_19-Apr_6	0	0	magic
M178	6	19	4	19-Apr	2016		6	33	34	119	140	21	477	5	41	0	M178_19-Apr_6	0	0	magic
M178	6	19	4	19-Apr	2016		6	33	34	119	140	21	477	5	42	3	M178_19-Apr_6	2.142857143	2.521008403	magic
M178	6	19	4	19-Apr	2016		6	33	34	119	140	21	477	5	43	3	M178_19-Apr_6	2.142857143	2.521008403	magic
M178	6	19	4	19-Apr	2016		6	33	34	119	140	21	477	5	44	2	M178_19-Apr_6	1.428571429	1.680672269	magic
M178	6	19	4	19-Apr	2016		6	33	34	119	140	21	477	5	45	2	M178_19-Apr_6	1.428571429	1.680672269	magic
M178	6	19	4	19-Apr	2016		6	33	34	119	140	21	477	5	46	0	M178_19-Apr_6	0	0	magic
M178	6	19	4	19-Apr	2016		6	33	34	119	140	21	477	5	47	6	M178_19-Apr_6	4.285714286	5.042016807	magic
M178	6	19	4	19-Apr	2016		6	33	34	119	140	21	477	5	48	2	M178_19-Apr_6	1.428571429	1.680672269	magic
M178	6	19	4	19-Apr	2016		6	33	34	119	140	21	477	5	49	2	M178_19-Apr_6	1.428571429	1.680672269	magic
M178	6	19	4	19-Apr	2016		6	33	34	119	140	21	477	5	50	3	M178_19-Apr_6	2.142857143	2.521008403	magic
M178	6	19	4	19-Apr	2016		6	33	34	119	140	21	477	5	51	3	M178_19-Apr_6	2.142857143	2.521008403	magic
M192	4	6	4	6-Apr	2016		6	27	29	52	160	108	604	2	1	0	M192_06-Apr_4	0	0	magic
M192	4	6	4	6-Apr	2016		6	27	29	52	160	108	604	2	2	0	M192_06-Apr_4	0	0	magic
M192	4	6	4	6-Apr	2016		6	27	29	52	160	108	604	2	3	6	M192_06-Apr_4	3.75	11.53846154	magic
M192	4	6	4	6-Apr	2016		6	27	29	52	160	108	604	2	4	28	M192_06-Apr_4	17.5	53.84615385	magic
M192	4	6	4	6-Apr	2016		6	27	29	52	160	108	604	2	5	10	M192_06-Apr_4	6.25	19.23076923	magic
M192	4	6	4	6-Apr	2016		6	27	29	52	160	108	604	2	6	8	M192_06-Apr_4	5	15.38461538	magic
M192	4	6	4	6-Apr	2016		6	27	29	52	160	108	604	2	7	0	M192_06-Apr_4	0	0	magic
M192	5	6	4	6-Apr	2016		6	30	29	37	193	156	605	3	1	0	M192_06-Apr_5	0	0	magic
M192	5	6	4	6-Apr	2016		6	30	29	37	193	156	605	3	2	0	M192_06-Apr_5	0	0	magic
M192	5	6	4	6-Apr	2016		6	30	29	37	193	156	605	3	3	6	M192_06-Apr_5	3.10880829	16.21621622	magic
M192	5	6	4	6-Apr	2016		6	30	29	37	193	156	605	3	4	12	M192_06-Apr_5	6.21761658	32.43243243	magic
M192	5	6	4	6-Apr	2016		6	30	29	37	193	156	605	3	5	14	M192_06-Apr_5	7.25388601	37.83783784	magic
M192	5	6	4	6-Apr	2016		6	30	29	37	193	156	605	3	6	5	M192_06-Apr_5	2.590673575	13.51351351	magic
M192	5	6	4	6-Apr	2016		6	30	29	37	193	156	605	3	7	0	M192_06-Apr_5	0	0	magic
M192	6	6	4	6-Apr	2016		6	30	29	99	146	47	603	1	1	0	M192_06-Apr_6	0	0	magic
M192	6	6	4	6-Apr	2016		6	30	29	99	146	47	603	1	2	1	M192_06-Apr_6	0.684931507	1.01010101	magic
M192	6	6	4	6-Apr	2016		6	30	29	99	146	47	603	1	3	27	M192_06-Apr_6	18.49315068	27.27272727	magic
M192	6	6	4	6-Apr	2016		6	30	29	99	146	47	603	1	4	35	M192_06-Apr_6	23.97260274	35.35353535	magic
M192	6	6	4	6-Apr	2016		6	30	29	99	146	47	603	1	5	24	M192_06-Apr_6	16.43835616	24.24242424	magic
M192	6	6	4	6-Apr	2016		6	30	29	99	146	47	603	1	6	11	M192_06-Apr_6	7.534246575	11.11111111	magic
M192	6	6	4	6-Apr	2016		6	30	29	99	146	47	603	1	7	1	M192_06-Apr_6	0.684931507	1.01010101	magic
M311	1	25	11	25-Nov	2016	31/01/2017	13	31	31	29	114	85	875	3	1	0	M311_25-Nov_1	0	0	magic
M311	1	25	11	25-Nov	2016	31/01/2017	13	31	31	29	114	85	875	3	2	3	M311_25-Nov_1	2.631578947	10.34482759	magic
M311	1	25	11	25-Nov	2016	31/01/2017	13	31	31	29	114	85	875	3	3	11	M311_25-Nov_1	9.649122807	37.93103448	magic
M311	1	25	11	25-Nov	2016	31/01/2017	13	31	31	29	114	85	875	3	4	2	M311_25-Nov_1	1.754385965	6.896551724	magic
M311	1	25	11	25-Nov	2016	31/01/2017	13	31	31	29	114	85	875	3	5	1	M311_25-Nov_1	0.877192982	3.448275862	magic
M311	1	25	11	25-Nov	2016	31/01/2017	13	31	31	29	114	85	875	3	6	1	M311_25-Nov_1	0.877192982	3.448275862	magic
M311	1	25	11	25-Nov	2016	31/01/2017	13	31	31	29	114	85	875	3	7	1	M311_25-Nov_1	0.877192982	3.448275862	magic
M311	1	25	11	25-Nov	2016	31/01/2017	13	31	31	29	114	85	875	3	8	0	M311_25-Nov_1	0	0	magic
M311	1	25	11	25-Nov	2016	31/01/2017	13	31	31	29	114	85	875	3	9	0	M311_25-Nov_1	0	0	magic
M311	1	25	11	25-Nov	2016	31/01/2017	13	31	31	29	114	85	875	3	10	0	M311_25-Nov_1	0	0	magic
M311	1	25	11	25-Nov	2016	31/01/2017	13	31	31	29	114	85	875	3	11	0	M311_25-Nov_1	0	0	magic
M311	1	25	11	25-Nov	2016	31/01/2017	13	31	31	29	114	85	875	3	12	0	M311_25-Nov_1	0	0	magic
M311	1	25	11	25-Nov	2016	31/01/2017	13	31	31	29	114	85	875	3	13	0	M311_25-Nov_1	0	0	magic
M311	1	25	11	25-Nov	2016	31/01/2017	13	31	31	29	114	85	875	3	14	0	M311_25-Nov_1	0	0	magic
M311	1	25	11	25-Nov	2016	31/01/2017	13	31	31	29	114	85	875	3	15	0	M311_25-Nov_1	0	0	magic
M311	1	25	11	25-Nov	2016	31/01/2017	13	31	31	29	114	85	875	3	16	0	M311_25-Nov_1	0	0	magic
M311	1	25	11	25-Nov	2016	31/01/2017	13	31	31	29	114	85	875	3	17	0	M311_25-Nov_1	0	0	magic
M311	1	25	11	25-Nov	2016	31/01/2017	13	31	31	29	114	85	875	3	18	0	M311_25-Nov_1	0	0	magic
M311	1	25	11	25-Nov	2016	31/01/2017	13	31	31	29	114	85	875	3	19	0	M311_25-Nov_1	0	0	magic
M311	1	25	11	25-Nov	2016	31/01/2017	13	31	31	29	114	85	875	3	20	0	M311_25-Nov_1	0	0	magic
M311	1	25	11	25-Nov	2016	31/01/2017	13	31	31	29	114	85	875	3	21	0	M311_25-Nov_1	0	0	magic
M311	1	25	11	25-Nov	2016	31/01/2017	13	31	31	29	114	85	875	3	22	0	M311_25-Nov_1	0	0	magic
M311	1	25	11	25-Nov	2016	31/01/2017	13	31	31	29	114	85	875	3	23	0	M311_25-Nov_1	0	0	magic
M311	1	25	11	25-Nov	2016	31/01/2017	13	31	31	29	114	85	875	3	24	0	M311_25-Nov_1	0	0	magic
M311	1	25	11	25-Nov	2016	31/01/2017	13	31	31	29	114	85	875	3	25	0	M311_25-Nov_1	0	0	magic
M311	1	25	11	25-Nov	2016	31/01/2017	13	31	31	29	114	85	875	3	26	0	M311_25-Nov_1	0	0	magic
M311	1	25	11	25-Nov	2016	31/01/2017	13	31	31	29	114	85	875	3	27	0	M311_25-Nov_1	0	0	magic
M311	1	25	11	25-Nov	2016	31/01/2017	13	31	31	29	114	85	875	3	28	0	M311_25-Nov_1	0	0	magic
M311	1	25	11	25-Nov	2016	31/01/2017	13	31	31	29	114	85	875	3	29	0	M311_25-Nov_1	0	0	magic
M311	1	25	11	25-Nov	2016	31/01/2017	13	31	31	29	114	85	875	3	30	0	M311_25-Nov_1	0	0	magic
M311	1	25	11	25-Nov	2016	31/01/2017	13	31	31	29	114	85	875	3	31	0	M311_25-Nov_1	0	0	magic
M311	1	25	11	25-Nov	2016	31/01/2017	13	31	31	29	114	85	875	3	32	0	M311_25-Nov_1	0	0	magic
M311	1	25	11	25-Nov	2016	31/01/2017	13	31	31	29	114	85	875	3	33	0	M311_25-Nov_1	0	0	magic
M311	1	25	11	25-Nov	2016	31/01/2017	13	31	31	29	114	85	875	3	34	0	M311_25-Nov_1	0	0	magic
M311	1	25	11	25-Nov	2016	31/01/2017	13	31	31	29	114	85	875	3	35	0	M311_25-Nov_1	0	0	magic
M311	1	25	11	25-Nov	2016	31/01/2017	13	31	31	29	114	85	875	3	36	0	M311_25-Nov_1	0	0	magic
M311	1	25	11	25-Nov	2016	31/01/2017	13	31	31	29	114	85	875	3	37	0	M311_25-Nov_1	0	0	magic
M311	1	25	11	25-Nov	2016	31/01/2017	13	31	31	29	114	85	875	3	38	0	M311_25-Nov_1	0	0	magic
M311	1	25	11	25-Nov	2016	31/01/2017	13	31	31	29	114	85	875	3	39	0	M311_25-Nov_1	0	0	magic
M311	1	25	11	25-Nov	2016	31/01/2017	13	31	31	29	114	85	875	3	40	0	M311_25-Nov_1	0	0	magic
M311	1	25	11	25-Nov	2016	31/01/2017	13	31	31	29	114	85	875	3	41	0	M311_25-Nov_1	0	0	magic
M311	1	25	11	25-Nov	2016	31/01/2017	13	31	31	29	114	85	875	3	42	0	M311_25-Nov_1	0	0	magic
M311	1	25	11	25-Nov	2016	31/01/2017	13	31	31	29	114	85	875	3	43	0	M311_25-Nov_1	0	0	magic
M311	1	25	11	25-Nov	2016	31/01/2017	13	31	31	29	114	85	875	3	44	0	M311_25-Nov_1	0	0	magic
M311	1	25	11	25-Nov	2016	31/01/2017	13	31	31	29	114	85	875	3	45	0	M311_25-Nov_1	0	0	magic
M311	1	25	11	25-Nov	2016	31/01/2017	13	31	31	29	114	85	875	3	46	0	M311_25-Nov_1	0	0	magic
M311	1	25	11	25-Nov	2016	31/01/2017	13	31	31	29	114	85	875	3	47	1	M311_25-Nov_1	0.877192982	3.448275862	magic
M311	1	25	11	25-Nov	2016	31/01/2017	13	31	31	29	114	85	875	3	48	0	M311_25-Nov_1	0	0	magic
M311	1	25	11	25-Nov	2016	31/01/2017	13	31	31	29	114	85	875	3	49	0	M311_25-Nov_1	0	0	magic
M311	1	25	11	25-Nov	2016	31/01/2017	13	31	31	29	114	85	875	3	50	0	M311_25-Nov_1	0	0	magic
M311	1	25	11	25-Nov	2016	31/01/2017	13	31	31	29	114	85	875	3	51	1	M311_25-Nov_1	0.877192982	3.448275862	magic
M311	1	25	11	25-Nov	2016	31/01/2017	13	31	31	29	114	85	875	3	52	1	M311_25-Nov_1	0.877192982	3.448275862	magic
M311	1	25	11	25-Nov	2016	31/01/2017	13	31	31	29	114	85	875	3	53	0	M311_25-Nov_1	0	0	magic
M311	1	25	11	25-Nov	2016	31/01/2017	13	31	31	29	114	85	875	3	54	0	M311_25-Nov_1	0	0	magic
M311	1	25	11	25-Nov	2016	31/01/2017	13	31	31	29	114	85	875	3	55	1	M311_25-Nov_1	0.877192982	3.448275862	magic
M311	1	25	11	25-Nov	2016	31/01/2017	13	31	31	29	114	85	875	3	56	0	M311_25-Nov_1	0	0	magic
M311	1	25	11	25-Nov	2016	31/01/2017	13	31	31	29	114	85	875	3	57	1	M311_25-Nov_1	0.877192982	3.448275862	magic
M311	1	25	11	25-Nov	2016	31/01/2017	13	31	31	29	114	85	875	3	58	0	M311_25-Nov_1	0	0	magic
M311	1	25	11	25-Nov	2016	31/01/2017	13	31	31	29	114	85	875	3	59	0	M311_25-Nov_1	0	0	magic
M311	1	25	11	25-Nov	2016	31/01/2017	13	31	31	29	114	85	875	3	60	0	M311_25-Nov_1	0	0	magic
M311	1	25	11	25-Nov	2016	31/01/2017	13	31	31	29	114	85	875	3	61	1	M311_25-Nov_1	0.877192982	3.448275862	magic
M311	1	25	11	25-Nov	2016	31/01/2017	13	31	31	29	114	85	875	3	62	0	M311_25-Nov_1	0	0	magic
M311	1	25	11	25-Nov	2016	31/01/2017	13	31	31	29	114	85	875	3	63	0	M311_25-Nov_1	0	0	magic
M311	1	25	11	25-Nov	2016	31/01/2017	13	31	31	29	114	85	875	3	64	1	M311_25-Nov_1	0.877192982	3.448275862	magic
M311	1	25	11	25-Nov	2016	31/01/2017	13	31	31	29	114	85	875	3	65	1	M311_25-Nov_1	0.877192982	3.448275862	magic
M311	1	25	11	25-Nov	2016	31/01/2017	13	31	31	29	114	85	875	3	66	1	M311_25-Nov_1	0.877192982	3.448275862	magic
M311	1	25	11	25-Nov	2016	31/01/2017	13	31	31	29	114	85	875	3	67	1	M311_25-Nov_1	0.877192982	3.448275862	magic
M311	2	25	11	25-Nov	2016	31/01/2017	13	31	31	45	118	73	873	1	1	0	M311_25-Nov_2	0	0	magic
M311	2	25	11	25-Nov	2016	31/01/2017	13	31	31	45	118	73	873	1	2	6	M311_25-Nov_2	5.084745763	13.33333333	magic
M311	2	25	11	25-Nov	2016	31/01/2017	13	31	31	45	118	73	873	1	3	14	M311_25-Nov_2	11.86440678	31.11111111	magic
M311	2	25	11	25-Nov	2016	31/01/2017	13	31	31	45	118	73	873	1	4	8	M311_25-Nov_2	6.779661017	17.77777778	magic
M311	2	25	11	25-Nov	2016	31/01/2017	13	31	31	45	118	73	873	1	5	4	M311_25-Nov_2	3.389830508	8.888888889	magic
M311	2	25	11	25-Nov	2016	31/01/2017	13	31	31	45	118	73	873	1	6	2	M311_25-Nov_2	1.694915254	4.444444444	magic
M311	2	25	11	25-Nov	2016	31/01/2017	13	31	31	45	118	73	873	1	7	1	M311_25-Nov_2	0.847457627	2.222222222	magic
M311	2	25	11	25-Nov	2016	31/01/2017	13	31	31	45	118	73	873	1	8	0	M311_25-Nov_2	0	0	magic
M311	2	25	11	25-Nov	2016	31/01/2017	13	31	31	45	118	73	873	1	9	0	M311_25-Nov_2	0	0	magic
M311	2	25	11	25-Nov	2016	31/01/2017	13	31	31	45	118	73	873	1	10	0	M311_25-Nov_2	0	0	magic
M311	2	25	11	25-Nov	2016	31/01/2017	13	31	31	45	118	73	873	1	11	0	M311_25-Nov_2	0	0	magic
M311	2	25	11	25-Nov	2016	31/01/2017	13	31	31	45	118	73	873	1	12	0	M311_25-Nov_2	0	0	magic
M311	2	25	11	25-Nov	2016	31/01/2017	13	31	31	45	118	73	873	1	13	0	M311_25-Nov_2	0	0	magic
M311	2	25	11	25-Nov	2016	31/01/2017	13	31	31	45	118	73	873	1	14	0	M311_25-Nov_2	0	0	magic
M311	2	25	11	25-Nov	2016	31/01/2017	13	31	31	45	118	73	873	1	15	0	M311_25-Nov_2	0	0	magic
M311	2	25	11	25-Nov	2016	31/01/2017	13	31	31	45	118	73	873	1	16	0	M311_25-Nov_2	0	0	magic
M311	2	25	11	25-Nov	2016	31/01/2017	13	31	31	45	118	73	873	1	17	0	M311_25-Nov_2	0	0	magic
M311	2	25	11	25-Nov	2016	31/01/2017	13	31	31	45	118	73	873	1	18	0	M311_25-Nov_2	0	0	magic
M311	2	25	11	25-Nov	2016	31/01/2017	13	31	31	45	118	73	873	1	19	0	M311_25-Nov_2	0	0	magic
M311	2	25	11	25-Nov	2016	31/01/2017	13	31	31	45	118	73	873	1	20	0	M311_25-Nov_2	0	0	magic
M311	2	25	11	25-Nov	2016	31/01/2017	13	31	31	45	118	73	873	1	21	0	M311_25-Nov_2	0	0	magic
M311	2	25	11	25-Nov	2016	31/01/2017	13	31	31	45	118	73	873	1	22	0	M311_25-Nov_2	0	0	magic
M311	2	25	11	25-Nov	2016	31/01/2017	13	31	31	45	118	73	873	1	23	0	M311_25-Nov_2	0	0	magic
M311	2	25	11	25-Nov	2016	31/01/2017	13	31	31	45	118	73	873	1	24	0	M311_25-Nov_2	0	0	magic
M311	2	25	11	25-Nov	2016	31/01/2017	13	31	31	45	118	73	873	1	25	0	M311_25-Nov_2	0	0	magic
M311	2	25	11	25-Nov	2016	31/01/2017	13	31	31	45	118	73	873	1	26	1	M311_25-Nov_2	0.847457627	2.222222222	magic
M311	2	25	11	25-Nov	2016	31/01/2017	13	31	31	45	118	73	873	1	27	0	M311_25-Nov_2	0	0	magic
M311	2	25	11	25-Nov	2016	31/01/2017	13	31	31	45	118	73	873	1	28	0	M311_25-Nov_2	0	0	magic
M311	2	25	11	25-Nov	2016	31/01/2017	13	31	31	45	118	73	873	1	29	0	M311_25-Nov_2	0	0	magic
M311	2	25	11	25-Nov	2016	31/01/2017	13	31	31	45	118	73	873	1	30	0	M311_25-Nov_2	0	0	magic
M311	2	25	11	25-Nov	2016	31/01/2017	13	31	31	45	118	73	873	1	31	0	M311_25-Nov_2	0	0	magic
M311	2	25	11	25-Nov	2016	31/01/2017	13	31	31	45	118	73	873	1	32	0	M311_25-Nov_2	0	0	magic
M311	2	25	11	25-Nov	2016	31/01/2017	13	31	31	45	118	73	873	1	33	0	M311_25-Nov_2	0	0	magic
M311	2	25	11	25-Nov	2016	31/01/2017	13	31	31	45	118	73	873	1	34	0	M311_25-Nov_2	0	0	magic
M311	2	25	11	25-Nov	2016	31/01/2017	13	31	31	45	118	73	873	1	35	0	M311_25-Nov_2	0	0	magic
M311	2	25	11	25-Nov	2016	31/01/2017	13	31	31	45	118	73	873	1	36	0	M311_25-Nov_2	0	0	magic
M311	2	25	11	25-Nov	2016	31/01/2017	13	31	31	45	118	73	873	1	37	0	M311_25-Nov_2	0	0	magic
M311	2	25	11	25-Nov	2016	31/01/2017	13	31	31	45	118	73	873	1	38	0	M311_25-Nov_2	0	0	magic
M311	2	25	11	25-Nov	2016	31/01/2017	13	31	31	45	118	73	873	1	39	0	M311_25-Nov_2	0	0	magic
M311	2	25	11	25-Nov	2016	31/01/2017	13	31	31	45	118	73	873	1	40	0	M311_25-Nov_2	0	0	magic
M311	2	25	11	25-Nov	2016	31/01/2017	13	31	31	45	118	73	873	1	41	0	M311_25-Nov_2	0	0	magic
M311	2	25	11	25-Nov	2016	31/01/2017	13	31	31	45	118	73	873	1	42	0	M311_25-Nov_2	0	0	magic
M311	2	25	11	25-Nov	2016	31/01/2017	13	31	31	45	118	73	873	1	43	0	M311_25-Nov_2	0	0	magic
M311	2	25	11	25-Nov	2016	31/01/2017	13	31	31	45	118	73	873	1	44	0	M311_25-Nov_2	0	0	magic
M311	2	25	11	25-Nov	2016	31/01/2017	13	31	31	45	118	73	873	1	45	0	M311_25-Nov_2	0	0	magic
M311	2	25	11	25-Nov	2016	31/01/2017	13	31	31	45	118	73	873	1	46	0	M311_25-Nov_2	0	0	magic
M311	2	25	11	25-Nov	2016	31/01/2017	13	31	31	45	118	73	873	1	47	0	M311_25-Nov_2	0	0	magic
M311	2	25	11	25-Nov	2016	31/01/2017	13	31	31	45	118	73	873	1	48	4	M311_25-Nov_2	3.389830508	8.888888889	magic
M311	2	25	11	25-Nov	2016	31/01/2017	13	31	31	45	118	73	873	1	49	1	M311_25-Nov_2	0.847457627	2.222222222	magic
M311	2	25	11	25-Nov	2016	31/01/2017	13	31	31	45	118	73	873	1	50	0	M311_25-Nov_2	0	0	magic
M311	2	25	11	25-Nov	2016	31/01/2017	13	31	31	45	118	73	873	1	51	1	M311_25-Nov_2	0.847457627	2.222222222	magic
M311	2	25	11	25-Nov	2016	31/01/2017	13	31	31	45	118	73	873	1	52	0	M311_25-Nov_2	0	0	magic
M311	2	25	11	25-Nov	2016	31/01/2017	13	31	31	45	118	73	873	1	53	0	M311_25-Nov_2	0	0	magic
M311	2	25	11	25-Nov	2016	31/01/2017	13	31	31	45	118	73	873	1	54	2	M311_25-Nov_2	1.694915254	4.444444444	magic
M311	2	25	11	25-Nov	2016	31/01/2017	13	31	31	45	118	73	873	1	55	0	M311_25-Nov_2	0	0	magic
M311	2	25	11	25-Nov	2016	31/01/2017	13	31	31	45	118	73	873	1	56	0	M311_25-Nov_2	0	0	magic
M311	2	25	11	25-Nov	2016	31/01/2017	13	31	31	45	118	73	873	1	57	0	M311_25-Nov_2	0	0	magic
M311	2	25	11	25-Nov	2016	31/01/2017	13	31	31	45	118	73	873	1	58	0	M311_25-Nov_2	0	0	magic
M311	2	25	11	25-Nov	2016	31/01/2017	13	31	31	45	118	73	873	1	59	0	M311_25-Nov_2	0	0	magic
M311	2	25	11	25-Nov	2016	31/01/2017	13	31	31	45	118	73	873	1	60	0	M311_25-Nov_2	0	0	magic
M311	2	25	11	25-Nov	2016	31/01/2017	13	31	31	45	118	73	873	1	61	0	M311_25-Nov_2	0	0	magic
M311	2	25	11	25-Nov	2016	31/01/2017	13	31	31	45	118	73	873	1	62	0	M311_25-Nov_2	0	0	magic
M311	2	25	11	25-Nov	2016	31/01/2017	13	31	31	45	118	73	873	1	63	1	M311_25-Nov_2	0.847457627	2.222222222	magic
M311	2	25	11	25-Nov	2016	31/01/2017	13	31	31	45	118	73	873	1	64	0	M311_25-Nov_2	0	0	magic
M311	2	25	11	25-Nov	2016	31/01/2017	13	31	31	45	118	73	873	1	65	0	M311_25-Nov_2	0	0	magic
M311	2	25	11	25-Nov	2016	31/01/2017	13	31	31	45	118	73	873	1	66	0	M311_25-Nov_2	0	0	magic
M311	2	25	11	25-Nov	2016	31/01/2017	13	31	31	45	118	73	873	1	67	0	M311_25-Nov_2	0	0	magic
M311	3	25	11	25-Nov	2016	31/01/2017	13	31	31	27	112	85	874	2	1	0	M311_25-Nov_3	0	0	magic
M311	3	25	11	25-Nov	2016	31/01/2017	13	31	31	27	112	85	874	2	2	2	M311_25-Nov_3	1.785714286	7.407407407	magic
M311	3	25	11	25-Nov	2016	31/01/2017	13	31	31	27	112	85	874	2	3	7	M311_25-Nov_3	6.25	25.92592593	magic
M311	3	25	11	25-Nov	2016	31/01/2017	13	31	31	27	112	85	874	2	4	4	M311_25-Nov_3	3.571428571	14.81481481	magic
M311	3	25	11	25-Nov	2016	31/01/2017	13	31	31	27	112	85	874	2	5	5	M311_25-Nov_3	4.464285714	18.51851852	magic
M311	3	25	11	25-Nov	2016	31/01/2017	13	31	31	27	112	85	874	2	6	1	M311_25-Nov_3	0.892857143	3.703703704	magic
M311	3	25	11	25-Nov	2016	31/01/2017	13	31	31	27	112	85	874	2	7	0	M311_25-Nov_3	0	0	magic
M311	3	25	11	25-Nov	2016	31/01/2017	13	31	31	27	112	85	874	2	8	0	M311_25-Nov_3	0	0	magic
M311	3	25	11	25-Nov	2016	31/01/2017	13	31	31	27	112	85	874	2	9	0	M311_25-Nov_3	0	0	magic
M311	3	25	11	25-Nov	2016	31/01/2017	13	31	31	27	112	85	874	2	10	0	M311_25-Nov_3	0	0	magic
M311	3	25	11	25-Nov	2016	31/01/2017	13	31	31	27	112	85	874	2	11	0	M311_25-Nov_3	0	0	magic
M311	3	25	11	25-Nov	2016	31/01/2017	13	31	31	27	112	85	874	2	12	0	M311_25-Nov_3	0	0	magic
M311	3	25	11	25-Nov	2016	31/01/2017	13	31	31	27	112	85	874	2	13	0	M311_25-Nov_3	0	0	magic
M311	3	25	11	25-Nov	2016	31/01/2017	13	31	31	27	112	85	874	2	14	0	M311_25-Nov_3	0	0	magic
M311	3	25	11	25-Nov	2016	31/01/2017	13	31	31	27	112	85	874	2	15	0	M311_25-Nov_3	0	0	magic
M311	3	25	11	25-Nov	2016	31/01/2017	13	31	31	27	112	85	874	2	16	0	M311_25-Nov_3	0	0	magic
M311	3	25	11	25-Nov	2016	31/01/2017	13	31	31	27	112	85	874	2	17	0	M311_25-Nov_3	0	0	magic
M311	3	25	11	25-Nov	2016	31/01/2017	13	31	31	27	112	85	874	2	18	0	M311_25-Nov_3	0	0	magic
M311	3	25	11	25-Nov	2016	31/01/2017	13	31	31	27	112	85	874	2	19	0	M311_25-Nov_3	0	0	magic
M311	3	25	11	25-Nov	2016	31/01/2017	13	31	31	27	112	85	874	2	20	0	M311_25-Nov_3	0	0	magic
M311	3	25	11	25-Nov	2016	31/01/2017	13	31	31	27	112	85	874	2	21	0	M311_25-Nov_3	0	0	magic
M311	3	25	11	25-Nov	2016	31/01/2017	13	31	31	27	112	85	874	2	22	0	M311_25-Nov_3	0	0	magic
M311	3	25	11	25-Nov	2016	31/01/2017	13	31	31	27	112	85	874	2	23	0	M311_25-Nov_3	0	0	magic
M311	3	25	11	25-Nov	2016	31/01/2017	13	31	31	27	112	85	874	2	24	0	M311_25-Nov_3	0	0	magic
M311	3	25	11	25-Nov	2016	31/01/2017	13	31	31	27	112	85	874	2	25	0	M311_25-Nov_3	0	0	magic
M311	3	25	11	25-Nov	2016	31/01/2017	13	31	31	27	112	85	874	2	26	1	M311_25-Nov_3	0.892857143	3.703703704	magic
M311	3	25	11	25-Nov	2016	31/01/2017	13	31	31	27	112	85	874	2	27	0	M311_25-Nov_3	0	0	magic
M311	3	25	11	25-Nov	2016	31/01/2017	13	31	31	27	112	85	874	2	28	0	M311_25-Nov_3	0	0	magic
M311	3	25	11	25-Nov	2016	31/01/2017	13	31	31	27	112	85	874	2	29	0	M311_25-Nov_3	0	0	magic
M311	3	25	11	25-Nov	2016	31/01/2017	13	31	31	27	112	85	874	2	30	0	M311_25-Nov_3	0	0	magic
M311	3	25	11	25-Nov	2016	31/01/2017	13	31	31	27	112	85	874	2	31	0	M311_25-Nov_3	0	0	magic
M311	3	25	11	25-Nov	2016	31/01/2017	13	31	31	27	112	85	874	2	32	0	M311_25-Nov_3	0	0	magic
M311	3	25	11	25-Nov	2016	31/01/2017	13	31	31	27	112	85	874	2	33	0	M311_25-Nov_3	0	0	magic
M311	3	25	11	25-Nov	2016	31/01/2017	13	31	31	27	112	85	874	2	34	0	M311_25-Nov_3	0	0	magic
M311	3	25	11	25-Nov	2016	31/01/2017	13	31	31	27	112	85	874	2	35	0	M311_25-Nov_3	0	0	magic
M311	3	25	11	25-Nov	2016	31/01/2017	13	31	31	27	112	85	874	2	36	0	M311_25-Nov_3	0	0	magic
M311	3	25	11	25-Nov	2016	31/01/2017	13	31	31	27	112	85	874	2	37	0	M311_25-Nov_3	0	0	magic
M311	3	25	11	25-Nov	2016	31/01/2017	13	31	31	27	112	85	874	2	38	0	M311_25-Nov_3	0	0	magic
M311	3	25	11	25-Nov	2016	31/01/2017	13	31	31	27	112	85	874	2	39	0	M311_25-Nov_3	0	0	magic
M311	3	25	11	25-Nov	2016	31/01/2017	13	31	31	27	112	85	874	2	40	0	M311_25-Nov_3	0	0	magic
M311	3	25	11	25-Nov	2016	31/01/2017	13	31	31	27	112	85	874	2	41	0	M311_25-Nov_3	0	0	magic
M311	3	25	11	25-Nov	2016	31/01/2017	13	31	31	27	112	85	874	2	42	0	M311_25-Nov_3	0	0	magic
M311	3	25	11	25-Nov	2016	31/01/2017	13	31	31	27	112	85	874	2	43	0	M311_25-Nov_3	0	0	magic
M311	3	25	11	25-Nov	2016	31/01/2017	13	31	31	27	112	85	874	2	44	0	M311_25-Nov_3	0	0	magic
M311	3	25	11	25-Nov	2016	31/01/2017	13	31	31	27	112	85	874	2	45	0	M311_25-Nov_3	0	0	magic
M311	3	25	11	25-Nov	2016	31/01/2017	13	31	31	27	112	85	874	2	46	0	M311_25-Nov_3	0	0	magic
M311	3	25	11	25-Nov	2016	31/01/2017	13	31	31	27	112	85	874	2	47	0	M311_25-Nov_3	0	0	magic
M311	3	25	11	25-Nov	2016	31/01/2017	13	31	31	27	112	85	874	2	48	0	M311_25-Nov_3	0	0	magic
M311	3	25	11	25-Nov	2016	31/01/2017	13	31	31	27	112	85	874	2	49	0	M311_25-Nov_3	0	0	magic
M311	3	25	11	25-Nov	2016	31/01/2017	13	31	31	27	112	85	874	2	50	0	M311_25-Nov_3	0	0	magic
M311	3	25	11	25-Nov	2016	31/01/2017	13	31	31	27	112	85	874	2	51	1	M311_25-Nov_3	0.892857143	3.703703704	magic
M311	3	25	11	25-Nov	2016	31/01/2017	13	31	31	27	112	85	874	2	52	1	M311_25-Nov_3	0.892857143	3.703703704	magic
M311	3	25	11	25-Nov	2016	31/01/2017	13	31	31	27	112	85	874	2	53	0	M311_25-Nov_3	0	0	magic
M311	3	25	11	25-Nov	2016	31/01/2017	13	31	31	27	112	85	874	2	54	0	M311_25-Nov_3	0	0	magic
M311	3	25	11	25-Nov	2016	31/01/2017	13	31	31	27	112	85	874	2	55	2	M311_25-Nov_3	1.785714286	7.407407407	magic
M311	3	25	11	25-Nov	2016	31/01/2017	13	31	31	27	112	85	874	2	56	2	M311_25-Nov_3	1.785714286	7.407407407	magic
M311	3	25	11	25-Nov	2016	31/01/2017	13	31	31	27	112	85	874	2	57	0	M311_25-Nov_3	0	0	magic
M311	3	25	11	25-Nov	2016	31/01/2017	13	31	31	27	112	85	874	2	58	0	M311_25-Nov_3	0	0	magic
M311	3	25	11	25-Nov	2016	31/01/2017	13	31	31	27	112	85	874	2	59	0	M311_25-Nov_3	0	0	magic
M311	3	25	11	25-Nov	2016	31/01/2017	13	31	31	27	112	85	874	2	60	0	M311_25-Nov_3	0	0	magic
M311	3	25	11	25-Nov	2016	31/01/2017	13	31	31	27	112	85	874	2	61	0	M311_25-Nov_3	0	0	magic
M311	3	25	11	25-Nov	2016	31/01/2017	13	31	31	27	112	85	874	2	62	0	M311_25-Nov_3	0	0	magic
M311	3	25	11	25-Nov	2016	31/01/2017	13	31	31	27	112	85	874	2	63	0	M311_25-Nov_3	0	0	magic
M311	3	25	11	25-Nov	2016	31/01/2017	13	31	31	27	112	85	874	2	64	0	M311_25-Nov_3	0	0	magic
M311	3	25	11	25-Nov	2016	31/01/2017	13	31	31	27	112	85	874	2	65	0	M311_25-Nov_3	0	0	magic
M311	3	25	11	25-Nov	2016	31/01/2017	13	31	31	27	112	85	874	2	66	0	M311_25-Nov_3	0	0	magic
M311	3	25	11	25-Nov	2016	31/01/2017	13	31	31	27	112	85	874	2	67	1	M311_25-Nov_3	0.892857143	3.703703704	magic
M355	1	13	7	13-Jul	2016	2-Aug	9	33	33	128	129	1	1054	1	1	0	M355_13-Jul_1	0	0	magic
M355	1	13	7	13-Jul	2016	2-Aug	9	33	33	128	129	1	1054	1	2	89	M355_13-Jul_1	68.99224806	69.53125	magic
M355	1	13	7	13-Jul	2016	2-Aug	9	33	33	128	129	1	1054	1	3	30	M355_13-Jul_1	23.25581395	23.4375	magic
M355	1	13	7	13-Jul	2016	2-Aug	9	33	33	128	129	1	1054	1	4	6	M355_13-Jul_1	4.651162791	4.6875	magic
M355	1	13	7	13-Jul	2016	2-Aug	9	33	33	128	129	1	1054	1	5	2	M355_13-Jul_1	1.550387597	1.5625	magic
M355	1	13	7	13-Jul	2016	2-Aug	9	33	33	128	129	1	1054	1	6	0	M355_13-Jul_1	0	0	magic
M355	1	13	7	13-Jul	2016	2-Aug	9	33	33	128	129	1	1054	1	7	0	M355_13-Jul_1	0	0	magic
M355	1	13	7	13-Jul	2016	2-Aug	9	33	33	128	129	1	1054	1	8	0	M355_13-Jul_1	0	0	magic
M355	1	13	7	13-Jul	2016	2-Aug	9	33	33	128	129	1	1054	1	9	0	M355_13-Jul_1	0	0	magic
M355	1	13	7	13-Jul	2016	2-Aug	9	33	33	128	129	1	1054	1	10	1	M355_13-Jul_1	0.775193798	0.78125	magic
M355	1	13	7	13-Jul	2016	2-Aug	9	33	33	128	129	1	1054	1	11	0	M355_13-Jul_1	0	0	magic
M355	1	13	7	13-Jul	2016	2-Aug	9	33	33	128	129	1	1054	1	12	0	M355_13-Jul_1	0	0	magic
M355	1	13	7	13-Jul	2016	2-Aug	9	33	33	128	129	1	1054	1	13	0	M355_13-Jul_1	0	0	magic
M355	1	13	7	13-Jul	2016	2-Aug	9	33	33	128	129	1	1054	1	14	0	M355_13-Jul_1	0	0	magic
M355	4	13	7	13-Jul	2016	31-Aug	9	36	33	103	124	21	1056	3	1	0	M355_13-Jul_4	0	0	magic
M355	4	13	7	13-Jul	2016	31-Aug	9	36	33	103	124	21	1056	3	2	46	M355_13-Jul_4	37.09677419	44.66019417	magic
M355	4	13	7	13-Jul	2016	31-Aug	9	36	33	103	124	21	1056	3	3	37	M355_13-Jul_4	29.83870968	35.9223301	magic
M355	4	13	7	13-Jul	2016	31-Aug	9	36	33	103	124	21	1056	3	4	11	M355_13-Jul_4	8.870967742	10.67961165	magic
M355	4	13	7	13-Jul	2016	31-Aug	9	36	33	103	124	21	1056	3	5	4	M355_13-Jul_4	3.225806452	3.883495146	magic
M355	4	13	7	13-Jul	2016	31-Aug	9	36	33	103	124	21	1056	3	6	2	M355_13-Jul_4	1.612903226	1.941747573	magic
M355	4	13	7	13-Jul	2016	31-Aug	9	36	33	103	124	21	1056	3	7	2	M355_13-Jul_4	1.612903226	1.941747573	magic
M355	4	13	7	13-Jul	2016	31-Aug	9	36	33	103	124	21	1056	3	8	0	M355_13-Jul_4	0	0	magic
M355	4	13	7	13-Jul	2016	31-Aug	9	36	33	103	124	21	1056	3	9	0	M355_13-Jul_4	0	0	magic
M355	4	13	7	13-Jul	2016	31-Aug	9	36	33	103	124	21	1056	3	10	0	M355_13-Jul_4	0	0	magic
M355	4	13	7	13-Jul	2016	31-Aug	9	36	33	103	124	21	1056	3	11	0	M355_13-Jul_4	0	0	magic
M355	4	13	7	13-Jul	2016	31-Aug	9	36	33	103	124	21	1056	3	12	0	M355_13-Jul_4	0	0	magic
M355	4	13	7	13-Jul	2016	31-Aug	9	36	33	103	124	21	1056	3	13	0	M355_13-Jul_4	0	0	magic
M355	4	13	7	13-Jul	2016	31-Aug	9	36	33	103	124	21	1056	3	14	1	M355_13-Jul_4	0.806451613	0.970873786	magic
M355	6	13	7	13-Jul	2016	2-Aug	9	30	33	130	135	5	1055	2	1	0	M355_13-Jul_6	0	0	magic
M355	6	13	7	13-Jul	2016	2-Aug	9	30	33	130	135	5	1055	2	2	115	M355_13-Jul_6	85.18518519	88.46153846	magic
M355	6	13	7	13-Jul	2016	2-Aug	9	30	33	130	135	5	1055	2	3	11	M355_13-Jul_6	8.148148148	8.461538462	magic
M355	6	13	7	13-Jul	2016	2-Aug	9	30	33	130	135	5	1055	2	4	4	M355_13-Jul_6	2.962962963	3.076923077	magic
M355	6	13	7	13-Jul	2016	2-Aug	9	30	33	130	135	5	1055	2	5	0	M355_13-Jul_6	0	0	magic
M355	6	13	7	13-Jul	2016	2-Aug	9	30	33	130	135	5	1055	2	6	0	M355_13-Jul_6	0	0	magic
M355	6	13	7	13-Jul	2016	2-Aug	9	30	33	130	135	5	1055	2	7	0	M355_13-Jul_6	0	0	magic
M355	6	13	7	13-Jul	2016	2-Aug	9	30	33	130	135	5	1055	2	8	0	M355_13-Jul_6	0	0	magic
M355	6	13	7	13-Jul	2016	2-Aug	9	30	33	130	135	5	1055	2	9	0	M355_13-Jul_6	0	0	magic
M355	6	13	7	13-Jul	2016	2-Aug	9	30	33	130	135	5	1055	2	10	0	M355_13-Jul_6	0	0	magic
M355	6	13	7	13-Jul	2016	2-Aug	9	30	33	130	135	5	1055	2	11	0	M355_13-Jul_6	0	0	magic
M355	6	13	7	13-Jul	2016	2-Aug	9	30	33	130	135	5	1055	2	12	0	M355_13-Jul_6	0	0	magic
M355	6	13	7	13-Jul	2016	2-Aug	9	30	33	130	135	5	1055	2	13	0	M355_13-Jul_6	0	0	magic
M355	6	13	7	13-Jul	2016	2-Aug	9	30	33	130	135	5	1055	2	14	0	M355_13-Jul_6	0	0	magic
M393	2	19	7	19-Jul	2016	31-Aug	10	29	29	131	138	7	1166	3	1	0	M393_19-Jul_2	0	0	magic
M393	2	19	7	19-Jul	2016	31-Aug	10	29	29	131	138	7	1166	3	2	7	M393_19-Jul_2	5.072463768	5.34351145	magic
M393	2	19	7	19-Jul	2016	31-Aug	10	29	29	131	138	7	1166	3	3	54	M393_19-Jul_2	39.13043478	41.22137405	magic
M393	2	19	7	19-Jul	2016	31-Aug	10	29	29	131	138	7	1166	3	4	45	M393_19-Jul_2	32.60869565	34.35114504	magic
M393	2	19	7	19-Jul	2016	31-Aug	10	29	29	131	138	7	1166	3	5	13	M393_19-Jul_2	9.420289855	9.923664122	magic
M393	2	19	7	19-Jul	2016	31-Aug	10	29	29	131	138	7	1166	3	6	5	M393_19-Jul_2	3.623188406	3.816793893	magic
M393	2	19	7	19-Jul	2016	31-Aug	10	29	29	131	138	7	1166	3	7	3	M393_19-Jul_2	2.173913043	2.290076336	magic
M393	2	19	7	19-Jul	2016	31-Aug	10	29	29	131	138	7	1166	3	8	0	M393_19-Jul_2	0	0	magic
M393	2	19	7	19-Jul	2016	31-Aug	10	29	29	131	138	7	1166	3	9	1	M393_19-Jul_2	0.724637681	0.763358779	magic
M393	2	19	7	19-Jul	2016	31-Aug	10	29	29	131	138	7	1166	3	10	0	M393_19-Jul_2	0	0	magic
M393	2	19	7	19-Jul	2016	31-Aug	10	29	29	131	138	7	1166	3	11	1	M393_19-Jul_2	0.724637681	0.763358779	magic
M393	2	19	7	19-Jul	2016	31-Aug	10	29	29	131	138	7	1166	3	12	0	M393_19-Jul_2	0	0	magic
M393	2	19	7	19-Jul	2016	31-Aug	10	29	29	131	138	7	1166	3	13	1	M393_19-Jul_2	0.724637681	0.763358779	magic
M393	2	19	7	19-Jul	2016	31-Aug	10	29	29	131	138	7	1166	3	14	0	M393_19-Jul_2	0	0	magic
M393	2	19	7	19-Jul	2016	31-Aug	10	29	29	131	138	7	1166	3	15	1	M393_19-Jul_2	0.724637681	0.763358779	magic
M393	2	19	7	19-Jul	2016	31-Aug	10	29	29	131	138	7	1166	3	16	0	M393_19-Jul_2	0	0	magic
M393	2	19	7	19-Jul	2016	31-Aug	10	29	29	131	138	7	1166	3	17	0	M393_19-Jul_2	0	0	magic
M393	2	19	7	19-Jul	2016	31-Aug	10	29	29	131	138	7	1166	3	18	0	M393_19-Jul_2	0	0	magic
M393	4a	19	7	19-Jul	2016	31-Aug	10	29	29	121	127	6	1165	2	1	0	M393_19-Jul_4a	0	0	magic
M393	4a	19	7	19-Jul	2016	31-Aug	10	29	29	121	127	6	1165	2	2	0	M393_19-Jul_4a	0	0	magic
M393	4a	19	7	19-Jul	2016	31-Aug	10	29	29	121	127	6	1165	2	3	38	M393_19-Jul_4a	29.92125984	31.40495868	magic
M393	4a	19	7	19-Jul	2016	31-Aug	10	29	29	121	127	6	1165	2	4	33	M393_19-Jul_4a	25.98425197	27.27272727	magic
M393	4a	19	7	19-Jul	2016	31-Aug	10	29	29	121	127	6	1165	2	5	25	M393_19-Jul_4a	19.68503937	20.66115702	magic
M393	4a	19	7	19-Jul	2016	31-Aug	10	29	29	121	127	6	1165	2	6	4	M393_19-Jul_4a	3.149606299	3.305785124	magic
M393	4a	19	7	19-Jul	2016	31-Aug	10	29	29	121	127	6	1165	2	7	4	M393_19-Jul_4a	3.149606299	3.305785124	magic
M393	4a	19	7	19-Jul	2016	31-Aug	10	29	29	121	127	6	1165	2	8	9	M393_19-Jul_4a	7.086614173	7.438016529	magic
M393	4a	19	7	19-Jul	2016	31-Aug	10	29	29	121	127	6	1165	2	9	3	M393_19-Jul_4a	2.362204724	2.479338843	magic
M393	4a	19	7	19-Jul	2016	31-Aug	10	29	29	121	127	6	1165	2	10	3	M393_19-Jul_4a	2.362204724	2.479338843	magic
M393	4a	19	7	19-Jul	2016	31-Aug	10	29	29	121	127	6	1165	2	11	1	M393_19-Jul_4a	0.787401575	0.826446281	magic
M393	4a	19	7	19-Jul	2016	31-Aug	10	29	29	121	127	6	1165	2	12	0	M393_19-Jul_4a	0	0	magic
M393	4a	19	7	19-Jul	2016	31-Aug	10	29	29	121	127	6	1165	2	13	0	M393_19-Jul_4a	0	0	magic
M393	4a	19	7	19-Jul	2016	31-Aug	10	29	29	121	127	6	1165	2	14	0	M393_19-Jul_4a	0	0	magic
M393	4a	19	7	19-Jul	2016	31-Aug	10	29	29	121	127	6	1165	2	15	0	M393_19-Jul_4a	0	0	magic
M393	4a	19	7	19-Jul	2016	31-Aug	10	29	29	121	127	6	1165	2	16	0	M393_19-Jul_4a	0	0	magic
M393	4a	19	7	19-Jul	2016	31-Aug	10	29	29	121	127	6	1165	2	17	0	M393_19-Jul_4a	0	0	magic
M393	4a	19	7	19-Jul	2016	31-Aug	10	29	29	121	127	6	1165	2	18	1	M393_19-Jul_4a	0.787401575	0.826446281	magic
M393	4b	19	7	19-Jul	2016	2-Aug	10	29	29	134	136	2	1164	1	1	0	M393_19-Jul_4b	0	0	magic
M393	4b	19	7	19-Jul	2016	2-Aug	10	29	29	134	136	2	1164	1	2	4	M393_19-Jul_4b	2.941176471	2.985074627	magic
M393	4b	19	7	19-Jul	2016	2-Aug	10	29	29	134	136	2	1164	1	3	87	M393_19-Jul_4b	63.97058824	64.92537313	magic
M393	4b	19	7	19-Jul	2016	2-Aug	10	29	29	134	136	2	1164	1	4	27	M393_19-Jul_4b	19.85294118	20.14925373	magic
M393	4b	19	7	19-Jul	2016	2-Aug	10	29	29	134	136	2	1164	1	5	13	M393_19-Jul_4b	9.558823529	9.701492537	magic
M393	4b	19	7	19-Jul	2016	2-Aug	10	29	29	134	136	2	1164	1	6	1	M393_19-Jul_4b	0.735294118	0.746268657	magic
M393	4b	19	7	19-Jul	2016	2-Aug	10	29	29	134	136	2	1164	1	7	0	M393_19-Jul_4b	0	0	magic
M393	4b	19	7	19-Jul	2016	2-Aug	10	29	29	134	136	2	1164	1	8	0	M393_19-Jul_4b	0	0	magic
M393	4b	19	7	19-Jul	2016	2-Aug	10	29	29	134	136	2	1164	1	9	1	M393_19-Jul_4b	0.735294118	0.746268657	magic
M393	4b	19	7	19-Jul	2016	2-Aug	10	29	29	134	136	2	1164	1	10	0	M393_19-Jul_4b	0	0	magic
M393	4b	19	7	19-Jul	2016	2-Aug	10	29	29	134	136	2	1164	1	11	0	M393_19-Jul_4b	0	0	magic
M393	4b	19	7	19-Jul	2016	2-Aug	10	29	29	134	136	2	1164	1	12	0	M393_19-Jul_4b	0	0	magic
M393	4b	19	7	19-Jul	2016	2-Aug	10	29	29	134	136	2	1164	1	13	1	M393_19-Jul_4b	0.735294118	0.746268657	magic
M393	4b	19	7	19-Jul	2016	2-Aug	10	29	29	134	136	2	1164	1	14	0	M393_19-Jul_4b	0	0	magic
M393	4b	19	7	19-Jul	2016	2-Aug	10	29	29	134	136	2	1164	1	15	0	M393_19-Jul_4b	0	0	magic
M393	4b	19	7	19-Jul	2016	2-Aug	10	29	29	134	136	2	1164	1	16	0	M393_19-Jul_4b	0	0	magic
M393	4b	19	7	19-Jul	2016	2-Aug	10	29	29	134	136	2	1164	1	17	0	M393_19-Jul_4b	0	0	magic
M393	4b	19	7	19-Jul	2016	2-Aug	10	29	29	134	136	2	1164	1	18	0	M393_19-Jul_4b	0	0	magic
M426	1	26	7	26-Jul	2016	28/09/2016	10	32	30	41	116	75	1282	2	1	0	M426_26-Jul_1	0	0	magic
M426	1	26	7	26-Jul	2016	28/09/2016	10	32	30	41	116	75	1282	2	2	16	M426_26-Jul_1	13.79310345	39.02439024	magic
M426	1	26	7	26-Jul	2016	28/09/2016	10	32	30	41	116	75	1282	2	3	22	M426_26-Jul_1	18.96551724	53.65853659	magic
M426	1	26	7	26-Jul	2016	28/09/2016	10	32	30	41	116	75	1282	2	4	3	M426_26-Jul_1	2.586206897	7.317073171	magic
M426	2	3	8	3-Aug	2016	28/09/2016	10	27	30	54	128	74	1283	3	1	0	M426_03-Aug_2	0	0	magic
M426	2	3	8	3-Aug	2016	28/09/2016	10	27	30	54	128	74	1283	3	2	4	M426_03-Aug_2	3.125	7.407407407	magic
M426	2	3	8	3-Aug	2016	28/09/2016	10	27	30	54	128	74	1283	3	3	38	M426_03-Aug_2	29.6875	70.37037037	magic
M426	2	3	8	3-Aug	2016	28/09/2016	10	27	30	54	128	74	1283	3	4	12	M426_03-Aug_2	9.375	22.22222222	magic
M426	6	26	7	26-Jul	2016	28/09/2016	10	32	30	51	124	73	1281	1	1	0	M426_26-Jul_6	0	0	magic
M426	6	26	7	26-Jul	2016	28/09/2016	10	32	30	51	124	73	1281	1	2	3	M426_26-Jul_6	2.419354839	5.882352941	magic
M426	6	26	7	26-Jul	2016	28/09/2016	10	32	30	51	124	73	1281	1	3	37	M426_26-Jul_6	29.83870968	72.54901961	magic
M426	6	26	7	26-Jul	2016	28/09/2016	10	32	30	51	124	73	1281	1	4	11	M426_26-Jul_6	8.870967742	21.56862745	magic
M492	1	3	10	3-Oct	2016	19/10/2016	12	34	32	107	164	57	1519	3	1	0	M492_03-Oct_1	0	0	magic
M492	1	3	10	3-Oct	2016	19/10/2016	12	34	32	107	164	57	1519	3	2	0	M492_03-Oct_1	0	0	magic
M492	1	3	10	3-Oct	2016	19/10/2016	12	34	32	107	164	57	1519	3	3	16	M492_03-Oct_1	9.756097561	14.95327103	magic
M492	1	3	10	3-Oct	2016	19/10/2016	12	34	32	107	164	57	1519	3	4	22	M492_03-Oct_1	13.41463415	20.56074766	magic
M492	1	3	10	3-Oct	2016	19/10/2016	12	34	32	107	164	57	1519	3	5	17	M492_03-Oct_1	10.36585366	15.88785047	magic
M492	1	3	10	3-Oct	2016	19/10/2016	12	34	32	107	164	57	1519	3	6	28	M492_03-Oct_1	17.07317073	26.1682243	magic
M492	1	3	10	3-Oct	2016	19/10/2016	12	34	32	107	164	57	1519	3	7	12	M492_03-Oct_1	7.317073171	11.21495327	magic
M492	1	3	10	3-Oct	2016	19/10/2016	12	34	32	107	164	57	1519	3	8	6	M492_03-Oct_1	3.658536585	5.607476636	magic
M492	1	3	10	3-Oct	2016	19/10/2016	12	34	32	107	164	57	1519	3	9	1	M492_03-Oct_1	0.609756098	0.934579439	magic
M492	1	3	10	3-Oct	2016	19/10/2016	12	34	32	107	164	57	1519	3	10	4	M492_03-Oct_1	2.43902439	3.738317757	magic
M492	1	3	10	3-Oct	2016	19/10/2016	12	34	32	107	164	57	1519	3	11	1	M492_03-Oct_1	0.609756098	0.934579439	magic
M492	1	3	10	3-Oct	2016	19/10/2016	12	34	32	107	164	57	1519	3	12	0	M492_03-Oct_1	0	0	magic
M492	1	3	10	3-Oct	2016	19/10/2016	12	34	32	107	164	57	1519	3	13	0	M492_03-Oct_1	0	0	magic
M492	1	3	10	3-Oct	2016	19/10/2016	12	34	32	107	164	57	1519	3	14	0	M492_03-Oct_1	0	0	magic
M492	3	12	9	12-Sep	2016	17/10/2016	12	31	32	101	120	19	1517	1	1	0	M492_12-Sep_3	0	0	magic
M492	3	12	9	12-Sep	2016	17/10/2016	12	31	32	101	120	19	1517	1	2	0	M492_12-Sep_3	0	0	magic
M492	3	12	9	12-Sep	2016	17/10/2016	12	31	32	101	120	19	1517	1	3	9	M492_12-Sep_3	7.5	8.910891089	magic
M492	3	12	9	12-Sep	2016	17/10/2016	12	31	32	101	120	19	1517	1	4	37	M492_12-Sep_3	30.83333333	36.63366337	magic
M492	3	12	9	12-Sep	2016	17/10/2016	12	31	32	101	120	19	1517	1	5	22	M492_12-Sep_3	18.33333333	21.78217822	magic
M492	3	12	9	12-Sep	2016	17/10/2016	12	31	32	101	120	19	1517	1	6	18	M492_12-Sep_3	15	17.82178218	magic
M492	3	12	9	12-Sep	2016	17/10/2016	12	31	32	101	120	19	1517	1	7	8	M492_12-Sep_3	6.666666667	7.920792079	magic
M492	3	12	9	12-Sep	2016	17/10/2016	12	31	32	101	120	19	1517	1	8	4	M492_12-Sep_3	3.333333333	3.96039604	magic
M492	3	12	9	12-Sep	2016	17/10/2016	12	31	32	101	120	19	1517	1	9	1	M492_12-Sep_3	0.833333333	0.99009901	magic
M492	3	12	9	12-Sep	2016	17/10/2016	12	31	32	101	120	19	1517	1	10	2	M492_12-Sep_3	1.666666667	1.98019802	magic
M492	3	12	9	12-Sep	2016	17/10/2016	12	31	32	101	120	19	1517	1	11	0	M492_12-Sep_3	0	0	magic
M492	3	12	9	12-Sep	2016	17/10/2016	12	31	32	101	120	19	1517	1	12	0	M492_12-Sep_3	0	0	magic
M492	3	12	9	12-Sep	2016	17/10/2016	12	31	32	101	120	19	1517	1	13	0	M492_12-Sep_3	0	0	magic
M492	3	12	9	12-Sep	2016	17/10/2016	12	31	32	101	120	19	1517	1	14	0	M492_12-Sep_3	0	0	magic
M492	4	3	10	3-Oct	2016	19/10/2016	12	27	32	61	143	82	1520	4	1	0	M492_03-Oct_4	0	0	magic
M492	4	3	10	3-Oct	2016	19/10/2016	12	27	32	61	143	82	1520	4	2	2	M492_03-Oct_4	1.398601399	3.278688525	magic
M492	4	3	10	3-Oct	2016	19/10/2016	12	27	32	61	143	82	1520	4	3	20	M492_03-Oct_4	13.98601399	32.78688525	magic
M492	4	3	10	3-Oct	2016	19/10/2016	12	27	32	61	143	82	1520	4	4	3	M492_03-Oct_4	2.097902098	4.918032787	magic
M492	4	3	10	3-Oct	2016	19/10/2016	12	27	32	61	143	82	1520	4	5	12	M492_03-Oct_4	8.391608392	19.67213115	magic
M492	4	3	10	3-Oct	2016	19/10/2016	12	27	32	61	143	82	1520	4	6	8	M492_03-Oct_4	5.594405594	13.1147541	magic
M492	4	3	10	3-Oct	2016	19/10/2016	12	27	32	61	143	82	1520	4	7	7	M492_03-Oct_4	4.895104895	11.47540984	magic
M492	4	3	10	3-Oct	2016	19/10/2016	12	27	32	61	143	82	1520	4	8	0	M492_03-Oct_4	0	0	magic
M492	4	3	10	3-Oct	2016	19/10/2016	12	27	32	61	143	82	1520	4	9	4	M492_03-Oct_4	2.797202797	6.557377049	magic
M492	4	3	10	3-Oct	2016	19/10/2016	12	27	32	61	143	82	1520	4	10	4	M492_03-Oct_4	2.797202797	6.557377049	magic
M492	4	3	10	3-Oct	2016	19/10/2016	12	27	32	61	143	82	1520	4	11	0	M492_03-Oct_4	0	0	magic
M492	4	3	10	3-Oct	2016	19/10/2016	12	27	32	61	143	82	1520	4	12	0	M492_03-Oct_4	0	0	magic
M492	4	3	10	3-Oct	2016	19/10/2016	12	27	32	61	143	82	1520	4	13	0	M492_03-Oct_4	0	0	magic
M492	4	3	10	3-Oct	2016	19/10/2016	12	27	32	61	143	82	1520	4	14	1	M492_03-Oct_4	0.699300699	1.639344262	magic
M492	6	3	10	3-Oct	2016	19/10/2016	12	34	32	148	162	14	1518	2	1	0	M492_03-Oct_6	0	0	magic
M492	6	3	10	3-Oct	2016	19/10/2016	12	34	32	148	162	14	1518	2	2	25	M492_03-Oct_6	15.43209877	16.89189189	magic
M492	6	3	10	3-Oct	2016	19/10/2016	12	34	32	148	162	14	1518	2	3	53	M492_03-Oct_6	32.71604938	35.81081081	magic
M492	6	3	10	3-Oct	2016	19/10/2016	12	34	32	148	162	14	1518	2	4	33	M492_03-Oct_6	20.37037037	22.2972973	magic
M492	6	3	10	3-Oct	2016	19/10/2016	12	34	32	148	162	14	1518	2	5	16	M492_03-Oct_6	9.87654321	10.81081081	magic
M492	6	3	10	3-Oct	2016	19/10/2016	12	34	32	148	162	14	1518	2	6	13	M492_03-Oct_6	8.024691358	8.783783784	magic
M492	6	3	10	3-Oct	2016	19/10/2016	12	34	32	148	162	14	1518	2	7	4	M492_03-Oct_6	2.469135802	2.702702703	magic
M492	6	3	10	3-Oct	2016	19/10/2016	12	34	32	148	162	14	1518	2	8	0	M492_03-Oct_6	0	0	magic
M492	6	3	10	3-Oct	2016	19/10/2016	12	34	32	148	162	14	1518	2	9	2	M492_03-Oct_6	1.234567901	1.351351351	magic
M492	6	3	10	3-Oct	2016	19/10/2016	12	34	32	148	162	14	1518	2	10	0	M492_03-Oct_6	0	0	magic
M492	6	3	10	3-Oct	2016	19/10/2016	12	34	32	148	162	14	1518	2	11	0	M492_03-Oct_6	0	0	magic
M492	6	3	10	3-Oct	2016	19/10/2016	12	34	32	148	162	14	1518	2	12	0	M492_03-Oct_6	0	0	magic
M492	6	3	10	3-Oct	2016	19/10/2016	12	34	32	148	162	14	1518	2	13	0	M492_03-Oct_6	0	0	magic
M492	6	3	10	3-Oct	2016	19/10/2016	12	34	32	148	162	14	1518	2	14	2	M492_03-Oct_6	1.234567901	1.351351351	magic
