# Supplementary material for: An ABA-GA bistable switch can account for natural variation in the variability of Arabidopsis seed germination time
Source: eLife. 2021 Jun 1;10:e59485. doi: 10.7554/eLife.59485 (PMC8169117; doi:10.7554/eLife.59485)
Supplement: Figure 4—figure supplement 3—source data 1. [file elife-59485-fig4-figsupp3-data1.tds]

Seed_sample	Rep	DAR	Total_germ	day	number	name	perc
Average F2		NA	1193.75	1	0	Average F2_	0
Average F2		NA	1193.75	2	0	Average F2_	0
Average F2		NA	1193.75	3	145.375	Average F2_	12.1780104712042
Average F2		NA	1193.75	4	501.875	Average F2_	42.0418848167539
Average F2		NA	1193.75	5	214.375	Average F2_	17.9581151832461
Average F2		NA	1193.75	6	74.625	Average F2_	6.25130890052356
Average F2		NA	1193.75	7	38.625	Average F2_	3.23560209424084
Average F2		NA	1193.75	8	26	Average F2_	2.17801047120419
Average F2		NA	1193.75	9	25.75	Average F2_	2.15706806282723
Average F2		NA	1193.75	10	25.5	Average F2_	2.13612565445026
Average F2		NA	1193.75	11	13.875	Average F2_	1.16230366492147
Average F2		NA	1193.75	12	6	Average F2_	0.50261780104712
Average F2		NA	1193.75	13	5.875	Average F2_	0.492146596858639
Average F2		NA	1193.75	14	5.875	Average F2_	0.492146596858639
Average F2		NA	1193.75	15	1.75	Average F2_	0.146596858638743
Average F2		NA	1193.75	16	1.625	Average F2_	0.136125654450262
Average F2		NA	1193.75	17	1.625	Average F2_	0.136125654450262
Average F2		NA	1193.75	18	0	Average F2_	0
Average F2		NA	1193.75	19	1.625	Average F2_	0.136125654450262
Average F2		NA	1193.75	20	0	Average F2_	0
Average F2		NA	1193.75	21	1.375	Average F2_	0.115183246073298
Average F2		NA	1193.75	22	0	Average F2_	0
Average F2		NA	1193.75	23	0	Average F2_	0
Average F2		NA	1193.75	24	0.125	Average F2_	0.0104712041884817
Average F2		NA	1193.75	25	1.125	Average F2_	0.0942408376963351
Average F2		NA	1193.75	26	1.125	Average F2_	0.0942408376963351
Average F2		NA	1193.75	27	4.875	Average F2_	0.408376963350785
Average F2		NA	1193.75	28	4.875	Average F2_	0.408376963350785
Average F2		NA	1193.75	29	5.125	Average F2_	0.429319371727749
Average F2		NA	1193.75	30	5.25	Average F2_	0.43979057591623
Average F2		NA	1193.75	31	5.25	Average F2_	0.43979057591623
Average F2		NA	1193.75	32	4.25	Average F2_	0.356020942408377
Average F2		NA	1193.75	33	4.375	Average F2_	0.366492146596859
Average F2		NA	1193.75	34	4.75	Average F2_	0.397905759162304
Average F2		NA	1193.75	35	3.875	Average F2_	0.324607329842932
Average F2		NA	1193.75	36	4	Average F2_	0.335078534031414
Average F2		NA	1193.75	37	3.875	Average F2_	0.324607329842932
Average F2		NA	1193.75	38	4	Average F2_	0.335078534031414
Average F2		NA	1193.75	39	4.625	Average F2_	0.387434554973822
Average F2		NA	1193.75	40	4.625	Average F2_	0.387434554973822
Average F2		NA	1193.75	41	4.5	Average F2_	0.37696335078534
Average F2		NA	1193.75	42	4.5	Average F2_	0.37696335078534
Average F2		NA	1193.75	43	4.125	Average F2_	0.345549738219895
Average F2		NA	1193.75	44	4.25	Average F2_	0.356020942408377
Average F2		NA	1193.75	45	4.25	Average F2_	0.356020942408377
Average F2		NA	1193.75	46	4.25	Average F2_	0.356020942408377
Average F2		NA	1193.75	47	2.375	Average F2_	0.198952879581152
Average F2		NA	1193.75	48	2.25	Average F2_	0.18848167539267
Average F2		NA	1193.75	49	2.25	Average F2_	0.18848167539267
Average F2		NA	1193.75	50	0	Average F2_	0
Average F2		NA	1193.75	51	0	Average F2_	0
Average F2		NA	1193.75	52	0.125	Average F2_	0.0104712041884817
Average F2		NA	1193.75	53	0.25	Average F2_	0.0209424083769633
Average F2		NA	1193.75	54	0.75	Average F2_	0.06282722513089
Average F2		NA	1193.75	55	0	Average F2_	0
Average F2		NA	1193.75	56	0	Average F2_	0
Average F2		NA	1193.75	57	0	Average F2_	0
Average F2		NA	1193.75	58	0	Average F2_	0
Average F2		NA	1193.75	59	0	Average F2_	0
Average F2		NA	1193.75	60	2	Average F2_	0.167539267015707
Col-0	pool	41	1131	1	0	Col-0_pool	0
Col-0	pool	41	1131	2	0	Col-0_pool	0
Col-0	pool	41	1131	3	643	Col-0_pool	56.8523430592396
Col-0	pool	41	1131	4	429	Col-0_pool	37.9310344827586
Col-0	pool	41	1131	5	29	Col-0_pool	2.56410256410256
Col-0	pool	41	1131	6	9	Col-0_pool	0.795755968169761
Col-0	pool	41	1131	7	3	Col-0_pool	0.26525198938992
Col-0	pool	41	1131	8	4	Col-0_pool	0.353669319186561
Col-0	pool	41	1131	9	3	Col-0_pool	0.26525198938992
Col-0	pool	41	1131	10	3	Col-0_pool	0.26525198938992
Col-0	pool	41	1131	11	4	Col-0_pool	0.353669319186561
Col-0	pool	41	1131	12	0	Col-0_pool	0
Col-0	pool	41	1131	13	0	Col-0_pool	0
Col-0	pool	41	1131	14	2	Col-0_pool	0.17683465959328
Col-0	pool	41	1131	15	0	Col-0_pool	0
Col-0	pool	41	1131	16	0	Col-0_pool	0
Col-0	pool	41	1131	17	1	Col-0_pool	0.0884173297966401
Col-0	pool	41	1131	18	0	Col-0_pool	0
Col-0	pool	41	1131	19	0	Col-0_pool	0
Col-0	pool	41	1131	20	0	Col-0_pool	0
Col-0	pool	41	1131	21	0	Col-0_pool	0
Col-0	pool	41	1131	22	0	Col-0_pool	0
Col-0	pool	41	1131	23	0	Col-0_pool	0
Col-0	pool	41	1131	24	0	Col-0_pool	0
Col-0	pool	41	1131	25	0	Col-0_pool	0
Col-0	pool	41	1131	26	0	Col-0_pool	0
Col-0	pool	41	1131	27	0	Col-0_pool	0
Col-0	pool	41	1131	28	0	Col-0_pool	0
Col-0	pool	41	1131	29	0	Col-0_pool	0
Col-0	pool	41	1131	30	0	Col-0_pool	0
Col-0	pool	41	1131	31	1	Col-0_pool	0.0884173297966401
Col-0	pool	41	1131	32	0	Col-0_pool	0
Col-0	pool	41	1131	33	0	Col-0_pool	0
Col-0	pool	41	1131	34	0	Col-0_pool	0
Col-0	pool	41	1131	35	0	Col-0_pool	0
Col-0	pool	41	1131	36	0	Col-0_pool	0
Col-0	pool	41	1131	37	0	Col-0_pool	0
Col-0	pool	41	1131	38	0	Col-0_pool	0
Col-0	pool	41	1131	39	0	Col-0_pool	0
Col-0	pool	41	1131	40	0	Col-0_pool	0
Col-0	pool	41	1131	41	0	Col-0_pool	0
Col-0	pool	41	1131	42	0	Col-0_pool	0
Col-0	pool	41	1131	43	0	Col-0_pool	0
Col-0	pool	41	1131	44	0	Col-0_pool	0
Col-0	pool	41	1131	45	0	Col-0_pool	0
Col-0	pool	41	1131	46	0	Col-0_pool	0
Col-0	pool	41	1131	47	0	Col-0_pool	0
Col-0	pool	41	1131	48	0	Col-0_pool	0
Col-0	pool	41	1131	49	0	Col-0_pool	0
Col-0	pool	41	1131	50	0	Col-0_pool	0
Col-0	pool	41	1131	51	0	Col-0_pool	0
Col-0	pool	41	1131	52	0	Col-0_pool	0
Col-0	pool	41	1131	53	0	Col-0_pool	0
Col-0	pool	41	1131	54	0	Col-0_pool	0
Col-0	pool	41	1131	55	0	Col-0_pool	0
Col-0	pool	41	1131	56	0	Col-0_pool	0
Col-0	pool	41	1131	57	0	Col-0_pool	0
Col-0	pool	41	1131	58	0	Col-0_pool	0
Col-0	pool	41	1131	59	0	Col-0_pool	0
Col-0	pool	41	1131	60	0	Col-0_pool	0
No-0	pool	35	1071	1	0	No-0_pool	0
No-0	pool	35	1071	2	0	No-0_pool	0
No-0	pool	35	1071	3	16	No-0_pool	1.49393090569561
No-0	pool	35	1071	4	660	No-0_pool	61.624649859944
No-0	pool	35	1071	5	153	No-0_pool	14.2857142857143
No-0	pool	35	1071	6	81	No-0_pool	7.56302521008403
No-0	pool	35	1071	7	62	No-0_pool	5.78898225957049
No-0	pool	35	1071	8	18	No-0_pool	1.68067226890756
No-0	pool	35	1071	9	18	No-0_pool	1.68067226890756
No-0	pool	35	1071	10	18	No-0_pool	1.68067226890756
No-0	pool	35	1071	11	13	No-0_pool	1.21381886087768
No-0	pool	35	1071	12	4	No-0_pool	0.373482726423903
No-0	pool	35	1071	13	3	No-0_pool	0.280112044817927
No-0	pool	35	1071	14	3	No-0_pool	0.280112044817927
No-0	pool	35	1071	15	3	No-0_pool	0.280112044817927
No-0	pool	35	1071	16	2	No-0_pool	0.186741363211951
No-0	pool	35	1071	17	2	No-0_pool	0.186741363211951
No-0	pool	35	1071	18	0	No-0_pool	0
No-0	pool	35	1071	19	0	No-0_pool	0
No-0	pool	35	1071	20	0	No-0_pool	0
No-0	pool	35	1071	21	0	No-0_pool	0
No-0	pool	35	1071	22	0	No-0_pool	0
No-0	pool	35	1071	23	0	No-0_pool	0
No-0	pool	35	1071	24	1	No-0_pool	0.0933706816059757
No-0	pool	35	1071	25	0	No-0_pool	0
No-0	pool	35	1071	26	0	No-0_pool	0
No-0	pool	35	1071	27	0	No-0_pool	0
No-0	pool	35	1071	28	0	No-0_pool	0
No-0	pool	35	1071	29	0	No-0_pool	0
No-0	pool	35	1071	30	0	No-0_pool	0
No-0	pool	35	1071	31	0	No-0_pool	0
No-0	pool	35	1071	32	0	No-0_pool	0
No-0	pool	35	1071	33	0	No-0_pool	0
No-0	pool	35	1071	34	0	No-0_pool	0
No-0	pool	35	1071	35	0	No-0_pool	0
No-0	pool	35	1071	36	0	No-0_pool	0
No-0	pool	35	1071	37	1	No-0_pool	0.0933706816059757
No-0	pool	35	1071	38	1	No-0_pool	0.0933706816059757
No-0	pool	35	1071	39	0	No-0_pool	0
No-0	pool	35	1071	40	0	No-0_pool	0
No-0	pool	35	1071	41	0	No-0_pool	0
No-0	pool	35	1071	42	1	No-0_pool	0.0933706816059757
No-0	pool	35	1071	43	0	No-0_pool	0
No-0	pool	35	1071	44	1	No-0_pool	0.0933706816059757
No-0	pool	35	1071	45	1	No-0_pool	0.0933706816059757
No-0	pool	35	1071	46	1	No-0_pool	0.0933706816059757
No-0	pool	35	1071	47	1	No-0_pool	0.0933706816059757
No-0	pool	35	1071	48	1	No-0_pool	0.0933706816059757
No-0	pool	35	1071	49	1	No-0_pool	0.0933706816059757
No-0	pool	35	1071	50	0	No-0_pool	0
No-0	pool	35	1071	51	0	No-0_pool	0
No-0	pool	35	1071	52	1	No-0_pool	0.0933706816059757
No-0	pool	35	1071	53	1	No-0_pool	0.0933706816059757
No-0	pool	35	1071	54	1	No-0_pool	0.0933706816059757
No-0	pool	35	1071	55	0	No-0_pool	0
No-0	pool	35	1071	56	0	No-0_pool	0
No-0	pool	35	1071	57	0	No-0_pool	0
No-0	pool	35	1071	58	0	No-0_pool	0
No-0	pool	35	1071	59	0	No-0_pool	0
No-0	pool	35	1071	60	2	No-0_pool	0.186741363211951
