# Supplementary material for: An ABA-GA bistable switch can account for natural variation in the variability of Arabidopsis seed germination time
Source: eLife. 2021 Jun 1;10:e59485. doi: 10.7554/eLife.59485 (PMC8169117; doi:10.7554/eLife.59485)
Supplement: Figure 4—figure supplement 4—source data 1. [file elife-59485-fig4-figsupp4-data1.tds]

F3_line	Day_parent_germ	name	Early.or.late.germinator	median	mean	mode	var	sd	cv	range	rel_range	iqr	quartile_coeff_disp	pct_germ
1_1	4	1_1_4	Early	3	2.84942084942085	3	0.275687647780671	0.525059661163063	0.184268905475926	5	1.75474254742547	0	0	100
1_1	49	1_1_49	Late	3	3.58181818181818	3	1.93361134278565	1.39054354221134	0.388222816353419	9	2.51269035532995	1.75	0.225806451612903	66.6666666666667
1_1	54	1_1_54	Late	2	2.35265700483092	2	0.258524459453121	0.508453006140313	0.216118628893316	3	1.27515400410678	1	0.2	99.0430622009569
1_2	4	1_2_4	Early	3	3.02314814814815	3	0.245973298880276	0.495956952648388	0.164053142070524	5	1.65390505359877	0	0	96.8609865470852
1_2	49	1_2_49	Late	3	2.67428571428571	2	0.680656814449918	0.825019281259485	0.308500799616261	6	2.24358974358974	1	0.2	98.314606741573
1_2	60	1_2_60	Late	3	3.07185628742515	3	0.657456171993363	0.810836711054305	0.263956590148283	8	2.60428849902534	0	0	97.0930232558139
1_3	4	1_3_4	Early	3	2.93827160493827	3	0.611876339149066	0.782225248345428	0.266219517294032	6	2.04201680672269	0	0	97.609561752988
1_4	4	1_4_4	Early	3	3.10931174089069	3	0.219709686975412	0.468731999094805	0.150751046583876	4	1.28645833333333	0	0	99.1967871485944
1_5	4	1_5_4	Early	3	3.50643776824034	3	0.880346307532929	0.938267716343757	0.267584305885062	6	1.71113831089351	1	0.142857142857143	99.1596638655462
2_1	4	2_1_4	Early	3	3.13186813186813	3	0.535000910691518	0.731437564452031	0.233546731105736	6	1.91578947368421	0	0	96.8253968253968
2_1	38	2_1_38	Late	3	3.14375	3	1.10499213836478	1.05118606267624	0.334373300254868	6	1.90854870775348	2	0.333333333333333	92.2279792746114
2_1	60	2_1_60	Late	4	3.86567164179104	4	0.733699921445405	0.856562853178565	0.2215818963821	6	1.55212355212355	1	0.142857142857143	75.7062146892655
2_2	4	2_2_4	Early	3	2.888	3	0.123951807228916	0.352067901446462	0.12190716809088	3	1.0387811634349	0	0	99.6078431372549
2_2	38	2_2_38	Late	4	3.90909090909091	4	1.38333333333333	1.17615191762516	0.300876071950621	6	1.53488372093023	1	0.142857142857143	75
2_3	4	2_3_4	Early	3	2.67588932806324	3	0.275487797226928	0.524869314426865	0.196147616765136	3	1.12112259970458	1	0.2	100
2_3	38	2_3_38	Late	3	3.23566878980892	3	0.488975992160706	0.699268183289291	0.216112410977202	5	1.54527559055118	0	0	95.3367875647668
2_4	4	2_4_4	Early	3	2.82432432432432	3	0.353613794790265	0.594654349004752	0.210547472853357	7	2.47846889952153	0	0	99.5535714285714
3_1	4	3_1_4	Early	3	3.35172413793103	3	0.576819923371648	0.759486618296628	0.226595801755167	5	1.4917695473251	1	0.142857142857143	67.4418604651163
3_1	43	3_1_43	Late	3	3.53125	3	0.79265873015873	0.890313838013725	0.252124272711851	5	1.41592920353982	1	0.142857142857143	95.5665024630542
3_1	47	3_1_47	Late	3	3.07826086956522	3	0.546453089244851	0.739224654110543	0.240143602324046	6	1.94915254237288	0	0	97.8571428571428
3_1	49	3_1_49	Late	2	2.60843373493976	2	0.97907995618839	0.98948469224561	0.379340551761597	6	2.30023094688222	1	0.2	86.4583333333333
3_1	54	3_1_54	Late	3	2.91061452513966	3	0.58747096855188	0.766466547575222	0.263334955884769	6	2.06142034548944	1	0.2	95.7219251336899
3_2	4	3_2_4	Early	3	3.09565217391304	3	0.121815074995253	0.349020164167134	0.112745277750619	4	1.29213483146067	0	0	99.1379310344828
3_2	43	3_2_43	Late	3	3.90740740740741	3	1.67051013277428	1.29248215955745	0.330777424720863	6	1.53554502369668	1	0.142857142857143	99.5
3_2	47	3_2_47	Late	3	2.89051094890511	3	0.495276942893946	0.703759151197301	0.243472231601087	5	1.72979797979798	1	0.2	35.1648351648352
3_2	49	3_2_49	Late	2	2.72268907563025	2	0.947870673693206	0.973586500365122	0.357582696121758	5	1.83641975308642	1	0.2	72.5609756097561
3_3	4	3_3_4	Early	3	3.12217194570136	3	0.271369806663924	0.520931671780402	0.166849129657201	5	1.60144927536232	0	0	100
3_3	43	3_3_43	Late	3	3.07591623036649	3	0.500783279053469	0.707660426372331	0.23006492159509	5	1.62553191489362	0	0	99.5215311004785
3_3	47	3_3_47	Late	3	3.11111111111111	3	0.685823754789272	0.828144766806669	0.266189389330715	5	1.60714285714286	0	0	98.9583333333333
3_4	4	3_4_4	Early	3	3.28333333333333	3	0.931938633193863	0.96536968731873	0.29402122456408	6	1.82741116751269	1	0.142857142857143	85.4092526690391
3_4	43	3_4_43	Late	4	4.37777777777778	4	1.49612983770287	1.22316386379866	0.279402913050456	7	1.5989847715736	2	0.25	32.3353293413174
3_4	47	3_4_47	Late	3	3.20224719101124	3	0.286548593918619	0.535302338794273	0.16716459000944	5	1.56140350877193	0	0	100
4_1	4	4_1_4	Early	3	2.83196721311475	3	0.165064426904135	0.406281216528817	0.143462542450118	3	1.05933429811867	0	0	98.7854251012146
4_1	47	4_1_47	Late	3	3.45217391304348	3	0.635850495804729	0.797402342487611	0.23098556520422	5	1.44836272040302	1	0.142857142857143	100
4_2	4	4_2_4	Early	3	3.11382113821138	3	0.370665339306454	0.608822912928262	0.195522763159729	5	1.60574412532637	0	0	100
4_3	4	4_3_4	Early	4	3.94767441860465	3	1.03233374133007	1.01603825780827	0.257376406985306	5	1.26656848306333	1	0.142857142857143	76.1061946902655
4_4	4	4_4_4	Early	3	3.24896265560166	3	0.729426002766252	0.854064402001542	0.262872951318482	7	2.15453384418902	0	0	99.1836734693878
4_5	4	4_5_4	Early	3	3.05813953488372	3	0.546307629538964	0.739126260891171	0.241691476945402	5	1.63498098859316	0	0	81.3084112149533
5_1	49	5_1_49	Late	3	3.61428571428571	3	2.3825282631038	1.54354405933352	0.427067526297812	9	2.4901185770751	2	0.333333333333333	84.5238095238095
5_1	60	5_1_60	Late	3	3.33566433566434	3	1.36540923864868	1.16850726940344	0.350307210743588	8	2.39832285115304	1	0.142857142857143	87.1951219512195
5_2	49	5_2_49	Late	3	2.9741935483871	2	1.40192710515291	1.18403002713314	0.398101202181426	6	2.01735357917571	2	0.333333333333333	79.4871794871795
5_2	60	5_2_60	Late	3	2.87150837988827	3	0.517105015378821	0.719100142802671	0.250425925217272	4	1.39299610894942	1	0.2	95.2127659574468
6_1	31	6_1_31	Late	3	2.64130434782609	3	0.406153480636731	0.637301718683334	0.241282955221674	3	1.1358024691358	1	0.2	81.3953488372093
6_1	47	6_1_47	Late	3	3.06806282722513	3	0.316395701295123	0.562490623295289	0.183337387456314	4	1.3037542662116	0	0	97.2677595628415
6_1	49	6_1_49	Late	2	2.58720930232558	2	0.688256493948048	0.82961225518193	0.320659118856836	5	1.93258426966292	1	0.2	91.9786096256685
6_1	60	6_1_60	Late	3	2.83333333333333	3	0.41304347826087	0.642684586917151	0.226829854206053	4	1.41176470588235	1	0.2	97.5903614457831
6_2	31	6_2_31	Late	2	2.5	2	0.586486486486486	0.765824057134853	0.306329622853941	6	2.4	1	0.2	91.4285714285714
6_2	47	6_2_47	Late	3	2.61421319796954	3	0.401429607375945	0.633584727858828	0.242361536676095	5	1.9126213592233	1	0.2	98.6175115207373
6_3	31	6_3_31	Late	3	2.98314606741573	3	0.581635244080493	0.762650145270092	0.255652967717658	5	1.67608286252354	0	0	95.1219512195122
6_3	47	6_3_47	Late	3	3.43243243243243	3	0.723294723294723	0.850467355807807	0.247773954054243	6	1.74803149606299	1	0.142857142857143	86.4661654135338
7_1	4	7_1_4	Early	3	2.80797101449275	3	0.206627140974967	0.454562582022506	0.161882932436402	4	1.42451612903226	0	0	98.5865724381625
7_1	31	7_1_31	Late	2	2.25233644859813	2	0.227107191435216	0.476557647546669	0.211583685840223	3	1.33195020746888	0	0	80.5128205128205
7_1	38	7_1_38	Late	3	3.36231884057971	3	0.991854437744631	0.995918891147583	0.296200015039583	6	1.78448275862069	1	0.142857142857143	61.734693877551
7_1	49	7_1_49	Late	3	2.91044776119403	2	1.07462686567164	1.03664211069763	0.35617959700893	5	1.71794871794872	2	0.333333333333333	78.8235294117647
7_2	4	7_2_4	Early	3	3.024	3	0.168096385542169	0.409995592100901	0.13558055294342	7	2.31481481481481	0	0	99.601593625498
7_2	31	7_2_31	Late	2	2.40865384615385	2	0.291132478632479	0.539566936192794	0.224011821812577	3	1.24550898203593	1	0.2	100
7_2	38	7_2_38	Late	3	3.07894736842105	3	0.506961849067112	0.712012534346912	0.23125193423233	6	1.94871794871795	0	0	100
7_3	4	7_3_4	Early	3	2.94047619047619	3	0.151821286283438	0.389642510878161	0.132510003699455	3	1.02024291497976	0	0	100
7_3	31	7_3_31	Late	2	2.3048128342246	2	0.309815421769881	0.556610655458446	0.241499286707029	4	1.73549883990719	1	0.2	93.4959349593496
7_4	4	7_4_4	Early	3	2.68650793650794	3	0.232008474040347	0.481672579705703	0.179293190673319	3	1.11669128508124	1	0.2	99.604743083004
7_4	31	7_4_31	Late	3	2.76923076923077	3	0.518636003172086	0.720163872442992	0.260059176159969	6	2.16666666666667	1	0.2	81.3186813186813
7_5	4	7_5_4	Early	3	2.73799126637555	3	0.220524017467249	0.469599848240232	0.171512544253609	3	1.09569377990431	1	0.2	99.1341991341991
7_5	31	7_5_31	Late	3	3.125	3	0.535024154589372	0.731453453467391	0.234065105109565	5	1.6	0	0	97.8947368421053
7_6	31	7_6_31	Late	2	2.44723618090452	2	0.329272625755038	0.573822817387944	0.234477906899796	4	1.63449691991786	1	0.2	47.3684210526316
7_7	31	7_7_31	Late	3	2.88421052631579	3	0.52620439988861	0.725399476074122	0.25150711761694	5	1.73357664233577	1	0.2	98.9583333333333
8_1	38	8_1_38	Late	3	2.70879120879121	3	0.406441624673669	0.637527744238373	0.235355069881103	4	1.47667342799189	1	0.2	100
8_1	54	8_1_54	Late	2	2.5	2	0.328729281767956	0.573349179617409	0.229339671846964	3	1.2	1	0.2	98.9130434782609
8_2	54	8_2_54	Late	3	2.53012048192771	3	0.250602409638554	0.50060204717775	0.197856999598825	2	0.79047619047619	1	0.2	100
8_3	54	8_3_54	Late	3	2.85474860335196	3	0.563053166781746	0.750368687234313	0.262849305312998	6	2.10176125244618	1	0.2	94.7089947089947
