# Supplementary material for: An ABA-GA bistable switch can account for natural variation in the variability of Arabidopsis seed germination time
Source: eLife. 2021 Jun 1;10:e59485. doi: 10.7554/eLife.59485 (PMC8169117; doi:10.7554/eLife.59485)
Supplement: Figure 4—figure supplement 5—source data 1. [file elife-59485-fig4-figsupp5-data1.tds]

Line	rep	accession background	ABA_uM	Experiment	Sowing.day	Sowing.month	Sowing_date	Year	Scoring.date	DAR	MeanDAR	Total.germinated	Total	NonGer	number.green	X..green	comments	id	day	number	name	perc
ahg1	1	Col-0	0	6	9	10	10-Sep	2020	29/10/2020	NA	2	187	188	1		NA	NA	103	1	0	ahg1_1_6_0	0
ahg1	1	Col-0	0	6	9	10	10-Sep	2020	29/10/2020	NA	2	187	188	1		NA	NA	103	2	42	ahg1_1_6_0	22.34042553
ahg1	1	Col-0	0	6	9	10	10-Sep	2020	29/10/2020	NA	2	187	188	1		NA	NA	103	3	116	ahg1_1_6_0	61.70212766
ahg1	1	Col-0	0	6	9	10	10-Sep	2020	29/10/2020	NA	2	187	188	1		NA	NA	103	4	22	ahg1_1_6_0	11.70212766
ahg1	1	Col-0	0	6	9	10	10-Sep	2020	29/10/2020	NA	2	187	188	1		NA	NA	103	5	4	ahg1_1_6_0	2.127659574
ahg1	1	Col-0	0	6	9	10	10-Sep	2020	29/10/2020	NA	2	187	188	1		NA	NA	103	6	1	ahg1_1_6_0	0.531914894
ahg1	1	Col-0	0	6	9	10	10-Sep	2020	29/10/2020	NA	2	187	188	1		NA	NA	103	7	0	ahg1_1_6_0	0
ahg1	1	Col-0	0	6	9	10	10-Sep	2020	29/10/2020	NA	2	187	188	1		NA	NA	103	8	2	ahg1_1_6_0	1.063829787
ahg1	1	Col-0	0	6	9	10	10-Sep	2020	29/10/2020	NA	2	187	188	1		NA	NA	103	9	0	ahg1_1_6_0	0
ahg1	1	Col-0	0	6	9	10	10-Sep	2020	29/10/2020	NA	2	187	188	1		NA	NA	103	10	0	ahg1_1_6_0	0
ahg1	1	Col-0	0	6	9	10	10-Sep	2020	29/10/2020	NA	2	187	188	1		NA	NA	103	11	0	ahg1_1_6_0	0
ahg1	1	Col-0	0	6	9	10	10-Sep	2020	29/10/2020	NA	2	187	188	1		NA	NA	103	12	0	ahg1_1_6_0	0
ahg1	1	Col-0	0	6	9	10	10-Sep	2020	29/10/2020	NA	2	187	188	1		NA	NA	103	13	0	ahg1_1_6_0	0
ahg1	1	Col-0	0	6	9	10	10-Sep	2020	29/10/2020	NA	2	187	188	1		NA	NA	103	14	0	ahg1_1_6_0	0
ahg1	1	Col-0	0	6	9	10	10-Sep	2020	29/10/2020	NA	2	187	188	1		NA	NA	103	15	0	ahg1_1_6_0	0
ahg1	1	Col-0	0	6	9	10	10-Sep	2020	29/10/2020	NA	2	187	188	1		NA	NA	103	16	0	ahg1_1_6_0	0
ahg1	1	Col-0	0	6	9	10	10-Sep	2020	29/10/2020	NA	2	187	188	1		NA	NA	103	17	0	ahg1_1_6_0	0
ahg1	1	Col-0	0	6	9	10	10-Sep	2020	29/10/2020	NA	2	187	188	1		NA	NA	103	18	0	ahg1_1_6_0	0
ahg1	1	Col-0	0	6	9	10	10-Sep	2020	29/10/2020	NA	2	187	188	1		NA	NA	103	19	0	ahg1_1_6_0	0
ahg1	1	Col-0	1	6	9	10	10-Sep	2020	29/10/2020	NA	2	144	159	15		NA	NA	97	1	0	ahg1_1_6_1	0
ahg1	1	Col-0	1	6	9	10	10-Sep	2020	29/10/2020	NA	2	144	159	15		NA	NA	97	2	1	ahg1_1_6_1	0.628930818
ahg1	1	Col-0	1	6	9	10	10-Sep	2020	29/10/2020	NA	2	144	159	15		NA	NA	97	3	5	ahg1_1_6_1	3.144654088
ahg1	1	Col-0	1	6	9	10	10-Sep	2020	29/10/2020	NA	2	144	159	15		NA	NA	97	4	40	ahg1_1_6_1	25.1572327
ahg1	1	Col-0	1	6	9	10	10-Sep	2020	29/10/2020	NA	2	144	159	15		NA	NA	97	5	56	ahg1_1_6_1	35.22012579
ahg1	1	Col-0	1	6	9	10	10-Sep	2020	29/10/2020	NA	2	144	159	15		NA	NA	97	6	14	ahg1_1_6_1	8.805031447
ahg1	1	Col-0	1	6	9	10	10-Sep	2020	29/10/2020	NA	2	144	159	15		NA	NA	97	7	17	ahg1_1_6_1	10.6918239
ahg1	1	Col-0	1	6	9	10	10-Sep	2020	29/10/2020	NA	2	144	159	15		NA	NA	97	8	4	ahg1_1_6_1	2.51572327
ahg1	1	Col-0	1	6	9	10	10-Sep	2020	29/10/2020	NA	2	144	159	15		NA	NA	97	9	0	ahg1_1_6_1	0
ahg1	1	Col-0	1	6	9	10	10-Sep	2020	29/10/2020	NA	2	144	159	15		NA	NA	97	10	2	ahg1_1_6_1	1.257861635
ahg1	1	Col-0	1	6	9	10	10-Sep	2020	29/10/2020	NA	2	144	159	15		NA	NA	97	11	0	ahg1_1_6_1	0
ahg1	1	Col-0	1	6	9	10	10-Sep	2020	29/10/2020	NA	2	144	159	15		NA	NA	97	12	0	ahg1_1_6_1	0
ahg1	1	Col-0	1	6	9	10	10-Sep	2020	29/10/2020	NA	2	144	159	15		NA	NA	97	13	0	ahg1_1_6_1	0
ahg1	1	Col-0	1	6	9	10	10-Sep	2020	29/10/2020	NA	2	144	159	15		NA	NA	97	14	0	ahg1_1_6_1	0
ahg1	1	Col-0	1	6	9	10	10-Sep	2020	29/10/2020	NA	2	144	159	15		NA	NA	97	15	0	ahg1_1_6_1	0
ahg1	1	Col-0	1	6	9	10	10-Sep	2020	29/10/2020	NA	2	144	159	15		NA	NA	97	16	1	ahg1_1_6_1	0.628930818
ahg1	1	Col-0	1	6	9	10	10-Sep	2020	29/10/2020	NA	2	144	159	15		NA	NA	97	17	0	ahg1_1_6_1	0
ahg1	1	Col-0	1	6	9	10	10-Sep	2020	29/10/2020	NA	2	144	159	15		NA	NA	97	18	3	ahg1_1_6_1	1.886792453
ahg1	1	Col-0	1	6	9	10	10-Sep	2020	29/10/2020	NA	2	144	159	15		NA	NA	97	19	1	ahg1_1_6_1	0.628930818
ahg1	1	Col-0	5	6	9	10	10-Sep	2020	29/10/2020	NA	2	13	157	144		NA	NA	99	1	0	ahg1_1_6_5	0
ahg1	1	Col-0	5	6	9	10	10-Sep	2020	29/10/2020	NA	2	13	157	144		NA	NA	99	2	0	ahg1_1_6_5	0
ahg1	1	Col-0	5	6	9	10	10-Sep	2020	29/10/2020	NA	2	13	157	144		NA	NA	99	3	1	ahg1_1_6_5	0.636942675
ahg1	1	Col-0	5	6	9	10	10-Sep	2020	29/10/2020	NA	2	13	157	144		NA	NA	99	4	0	ahg1_1_6_5	0
ahg1	1	Col-0	5	6	9	10	10-Sep	2020	29/10/2020	NA	2	13	157	144		NA	NA	99	5	3	ahg1_1_6_5	1.910828025
ahg1	1	Col-0	5	6	9	10	10-Sep	2020	29/10/2020	NA	2	13	157	144		NA	NA	99	6	0	ahg1_1_6_5	0
ahg1	1	Col-0	5	6	9	10	10-Sep	2020	29/10/2020	NA	2	13	157	144		NA	NA	99	7	2	ahg1_1_6_5	1.27388535
ahg1	1	Col-0	5	6	9	10	10-Sep	2020	29/10/2020	NA	2	13	157	144		NA	NA	99	8	3	ahg1_1_6_5	1.910828025
ahg1	1	Col-0	5	6	9	10	10-Sep	2020	29/10/2020	NA	2	13	157	144		NA	NA	99	9	0	ahg1_1_6_5	0
ahg1	1	Col-0	5	6	9	10	10-Sep	2020	29/10/2020	NA	2	13	157	144		NA	NA	99	10	1	ahg1_1_6_5	0.636942675
ahg1	1	Col-0	5	6	9	10	10-Sep	2020	29/10/2020	NA	2	13	157	144		NA	NA	99	11	0	ahg1_1_6_5	0
ahg1	1	Col-0	5	6	9	10	10-Sep	2020	29/10/2020	NA	2	13	157	144		NA	NA	99	12	2	ahg1_1_6_5	1.27388535
ahg1	1	Col-0	5	6	9	10	10-Sep	2020	29/10/2020	NA	2	13	157	144		NA	NA	99	13	0	ahg1_1_6_5	0
ahg1	1	Col-0	5	6	9	10	10-Sep	2020	29/10/2020	NA	2	13	157	144		NA	NA	99	14	1	ahg1_1_6_5	0.636942675
ahg1	1	Col-0	5	6	9	10	10-Sep	2020	29/10/2020	NA	2	13	157	144		NA	NA	99	15	0	ahg1_1_6_5	0
ahg1	1	Col-0	5	6	9	10	10-Sep	2020	29/10/2020	NA	2	13	157	144		NA	NA	99	16	0	ahg1_1_6_5	0
ahg1	1	Col-0	5	6	9	10	10-Sep	2020	29/10/2020	NA	2	13	157	144		NA	NA	99	17	0	ahg1_1_6_5	0
ahg1	1	Col-0	5	6	9	10	10-Sep	2020	29/10/2020	NA	2	13	157	144		NA	NA	99	18	0	ahg1_1_6_5	0
ahg1	1	Col-0	5	6	9	10	10-Sep	2020	29/10/2020	NA	2	13	157	144		NA	NA	99	19	0	ahg1_1_6_5	0
ahg1	1	Col-0	10	6	9	10	10-Sep	2020	29/10/2020	NA	2	2	157	155		NA	NA	98	1	0	ahg1_1_6_10	0
ahg1	1	Col-0	10	6	9	10	10-Sep	2020	29/10/2020	NA	2	2	157	155		NA	NA	98	2	0	ahg1_1_6_10	0
ahg1	1	Col-0	10	6	9	10	10-Sep	2020	29/10/2020	NA	2	2	157	155		NA	NA	98	3	0	ahg1_1_6_10	0
ahg1	1	Col-0	10	6	9	10	10-Sep	2020	29/10/2020	NA	2	2	157	155		NA	NA	98	4	0	ahg1_1_6_10	0
ahg1	1	Col-0	10	6	9	10	10-Sep	2020	29/10/2020	NA	2	2	157	155		NA	NA	98	5	0	ahg1_1_6_10	0
ahg1	1	Col-0	10	6	9	10	10-Sep	2020	29/10/2020	NA	2	2	157	155		NA	NA	98	6	0	ahg1_1_6_10	0
ahg1	1	Col-0	10	6	9	10	10-Sep	2020	29/10/2020	NA	2	2	157	155		NA	NA	98	7	0	ahg1_1_6_10	0
ahg1	1	Col-0	10	6	9	10	10-Sep	2020	29/10/2020	NA	2	2	157	155		NA	NA	98	8	0	ahg1_1_6_10	0
ahg1	1	Col-0	10	6	9	10	10-Sep	2020	29/10/2020	NA	2	2	157	155		NA	NA	98	9	0	ahg1_1_6_10	0
ahg1	1	Col-0	10	6	9	10	10-Sep	2020	29/10/2020	NA	2	2	157	155		NA	NA	98	10	1	ahg1_1_6_10	0.636942675
ahg1	1	Col-0	10	6	9	10	10-Sep	2020	29/10/2020	NA	2	2	157	155		NA	NA	98	11	0	ahg1_1_6_10	0
ahg1	1	Col-0	10	6	9	10	10-Sep	2020	29/10/2020	NA	2	2	157	155		NA	NA	98	12	1	ahg1_1_6_10	0.636942675
ahg1	1	Col-0	10	6	9	10	10-Sep	2020	29/10/2020	NA	2	2	157	155		NA	NA	98	13	0	ahg1_1_6_10	0
ahg1	1	Col-0	10	6	9	10	10-Sep	2020	29/10/2020	NA	2	2	157	155		NA	NA	98	14	0	ahg1_1_6_10	0
ahg1	1	Col-0	10	6	9	10	10-Sep	2020	29/10/2020	NA	2	2	157	155		NA	NA	98	15	0	ahg1_1_6_10	0
ahg1	1	Col-0	10	6	9	10	10-Sep	2020	29/10/2020	NA	2	2	157	155		NA	NA	98	16	0	ahg1_1_6_10	0
ahg1	1	Col-0	10	6	9	10	10-Sep	2020	29/10/2020	NA	2	2	157	155		NA	NA	98	17	0	ahg1_1_6_10	0
ahg1	1	Col-0	10	6	9	10	10-Sep	2020	29/10/2020	NA	2	2	157	155		NA	NA	98	18	0	ahg1_1_6_10	0
ahg1	1	Col-0	10	6	9	10	10-Sep	2020	29/10/2020	NA	2	2	157	155		NA	NA	98	19	0	ahg1_1_6_10	0
ahg1	2	Col-0	0	6	9	10	10-Sep	2020	29/10/2020	NA	2	162	173	11		NA	NA	104	1	0	ahg1_2_6_0	0
ahg1	2	Col-0	0	6	9	10	10-Sep	2020	29/10/2020	NA	2	162	173	11		NA	NA	104	2	7	ahg1_2_6_0	4.046242775
ahg1	2	Col-0	0	6	9	10	10-Sep	2020	29/10/2020	NA	2	162	173	11		NA	NA	104	3	132	ahg1_2_6_0	76.30057803
ahg1	2	Col-0	0	6	9	10	10-Sep	2020	29/10/2020	NA	2	162	173	11		NA	NA	104	4	15	ahg1_2_6_0	8.670520231
ahg1	2	Col-0	0	6	9	10	10-Sep	2020	29/10/2020	NA	2	162	173	11		NA	NA	104	5	7	ahg1_2_6_0	4.046242775
ahg1	2	Col-0	0	6	9	10	10-Sep	2020	29/10/2020	NA	2	162	173	11		NA	NA	104	6	1	ahg1_2_6_0	0.578034682
ahg1	2	Col-0	0	6	9	10	10-Sep	2020	29/10/2020	NA	2	162	173	11		NA	NA	104	7	0	ahg1_2_6_0	0
ahg1	2	Col-0	0	6	9	10	10-Sep	2020	29/10/2020	NA	2	162	173	11		NA	NA	104	8	0	ahg1_2_6_0	0
ahg1	2	Col-0	0	6	9	10	10-Sep	2020	29/10/2020	NA	2	162	173	11		NA	NA	104	9	0	ahg1_2_6_0	0
ahg1	2	Col-0	0	6	9	10	10-Sep	2020	29/10/2020	NA	2	162	173	11		NA	NA	104	10	0	ahg1_2_6_0	0
ahg1	2	Col-0	0	6	9	10	10-Sep	2020	29/10/2020	NA	2	162	173	11		NA	NA	104	11	0	ahg1_2_6_0	0
ahg1	2	Col-0	0	6	9	10	10-Sep	2020	29/10/2020	NA	2	162	173	11		NA	NA	104	12	0	ahg1_2_6_0	0
ahg1	2	Col-0	0	6	9	10	10-Sep	2020	29/10/2020	NA	2	162	173	11		NA	NA	104	13	0	ahg1_2_6_0	0
ahg1	2	Col-0	0	6	9	10	10-Sep	2020	29/10/2020	NA	2	162	173	11		NA	NA	104	14	0	ahg1_2_6_0	0
ahg1	2	Col-0	0	6	9	10	10-Sep	2020	29/10/2020	NA	2	162	173	11		NA	NA	104	15	0	ahg1_2_6_0	0
ahg1	2	Col-0	0	6	9	10	10-Sep	2020	29/10/2020	NA	2	162	173	11		NA	NA	104	16	0	ahg1_2_6_0	0
ahg1	2	Col-0	0	6	9	10	10-Sep	2020	29/10/2020	NA	2	162	173	11		NA	NA	104	17	0	ahg1_2_6_0	0
ahg1	2	Col-0	0	6	9	10	10-Sep	2020	29/10/2020	NA	2	162	173	11		NA	NA	104	18	0	ahg1_2_6_0	0
ahg1	2	Col-0	0	6	9	10	10-Sep	2020	29/10/2020	NA	2	162	173	11		NA	NA	104	19	0	ahg1_2_6_0	0
ahg1	2	Col-0	1	6	9	10	10-Sep	2020	29/10/2020	NA	2	145	159	14		NA	NA	95	1	0	ahg1_2_6_1	0
ahg1	2	Col-0	1	6	9	10	10-Sep	2020	29/10/2020	NA	2	145	159	14		NA	NA	95	2	0	ahg1_2_6_1	0
ahg1	2	Col-0	1	6	9	10	10-Sep	2020	29/10/2020	NA	2	145	159	14		NA	NA	95	3	10	ahg1_2_6_1	6.289308176
ahg1	2	Col-0	1	6	9	10	10-Sep	2020	29/10/2020	NA	2	145	159	14		NA	NA	95	4	90	ahg1_2_6_1	56.60377358
ahg1	2	Col-0	1	6	9	10	10-Sep	2020	29/10/2020	NA	2	145	159	14		NA	NA	95	5	31	ahg1_2_6_1	19.49685535
ahg1	2	Col-0	1	6	9	10	10-Sep	2020	29/10/2020	NA	2	145	159	14		NA	NA	95	6	9	ahg1_2_6_1	5.660377358
ahg1	2	Col-0	1	6	9	10	10-Sep	2020	29/10/2020	NA	2	145	159	14		NA	NA	95	7	5	ahg1_2_6_1	3.144654088
ahg1	2	Col-0	1	6	9	10	10-Sep	2020	29/10/2020	NA	2	145	159	14		NA	NA	95	8	0	ahg1_2_6_1	0
ahg1	2	Col-0	1	6	9	10	10-Sep	2020	29/10/2020	NA	2	145	159	14		NA	NA	95	9	0	ahg1_2_6_1	0
ahg1	2	Col-0	1	6	9	10	10-Sep	2020	29/10/2020	NA	2	145	159	14		NA	NA	95	10	0	ahg1_2_6_1	0
ahg1	2	Col-0	1	6	9	10	10-Sep	2020	29/10/2020	NA	2	145	159	14		NA	NA	95	11	0	ahg1_2_6_1	0
ahg1	2	Col-0	1	6	9	10	10-Sep	2020	29/10/2020	NA	2	145	159	14		NA	NA	95	12	0	ahg1_2_6_1	0
ahg1	2	Col-0	1	6	9	10	10-Sep	2020	29/10/2020	NA	2	145	159	14		NA	NA	95	13	0	ahg1_2_6_1	0
ahg1	2	Col-0	1	6	9	10	10-Sep	2020	29/10/2020	NA	2	145	159	14		NA	NA	95	14	0	ahg1_2_6_1	0
ahg1	2	Col-0	1	6	9	10	10-Sep	2020	29/10/2020	NA	2	145	159	14		NA	NA	95	15	0	ahg1_2_6_1	0
ahg1	2	Col-0	1	6	9	10	10-Sep	2020	29/10/2020	NA	2	145	159	14		NA	NA	95	16	0	ahg1_2_6_1	0
ahg1	2	Col-0	1	6	9	10	10-Sep	2020	29/10/2020	NA	2	145	159	14		NA	NA	95	17	0	ahg1_2_6_1	0
ahg1	2	Col-0	1	6	9	10	10-Sep	2020	29/10/2020	NA	2	145	159	14		NA	NA	95	18	0	ahg1_2_6_1	0
ahg1	2	Col-0	1	6	9	10	10-Sep	2020	29/10/2020	NA	2	145	159	14		NA	NA	95	19	0	ahg1_2_6_1	0
ahg1	2	Col-0	5	6	9	10	10-Sep	2020	29/10/2020	NA	2	5	164	159		NA	NA	93	1	0	ahg1_2_6_5	0
ahg1	2	Col-0	5	6	9	10	10-Sep	2020	29/10/2020	NA	2	5	164	159		NA	NA	93	2	0	ahg1_2_6_5	0
ahg1	2	Col-0	5	6	9	10	10-Sep	2020	29/10/2020	NA	2	5	164	159		NA	NA	93	3	0	ahg1_2_6_5	0
ahg1	2	Col-0	5	6	9	10	10-Sep	2020	29/10/2020	NA	2	5	164	159		NA	NA	93	4	0	ahg1_2_6_5	0
ahg1	2	Col-0	5	6	9	10	10-Sep	2020	29/10/2020	NA	2	5	164	159		NA	NA	93	5	1	ahg1_2_6_5	0.609756098
ahg1	2	Col-0	5	6	9	10	10-Sep	2020	29/10/2020	NA	2	5	164	159		NA	NA	93	6	1	ahg1_2_6_5	0.609756098
ahg1	2	Col-0	5	6	9	10	10-Sep	2020	29/10/2020	NA	2	5	164	159		NA	NA	93	7	0	ahg1_2_6_5	0
ahg1	2	Col-0	5	6	9	10	10-Sep	2020	29/10/2020	NA	2	5	164	159		NA	NA	93	8	1	ahg1_2_6_5	0.609756098
ahg1	2	Col-0	5	6	9	10	10-Sep	2020	29/10/2020	NA	2	5	164	159		NA	NA	93	9	0	ahg1_2_6_5	0
ahg1	2	Col-0	5	6	9	10	10-Sep	2020	29/10/2020	NA	2	5	164	159		NA	NA	93	10	1	ahg1_2_6_5	0.609756098
ahg1	2	Col-0	5	6	9	10	10-Sep	2020	29/10/2020	NA	2	5	164	159		NA	NA	93	11	0	ahg1_2_6_5	0
ahg1	2	Col-0	5	6	9	10	10-Sep	2020	29/10/2020	NA	2	5	164	159		NA	NA	93	12	1	ahg1_2_6_5	0.609756098
ahg1	2	Col-0	5	6	9	10	10-Sep	2020	29/10/2020	NA	2	5	164	159		NA	NA	93	13	0	ahg1_2_6_5	0
ahg1	2	Col-0	5	6	9	10	10-Sep	2020	29/10/2020	NA	2	5	164	159		NA	NA	93	14	0	ahg1_2_6_5	0
ahg1	2	Col-0	5	6	9	10	10-Sep	2020	29/10/2020	NA	2	5	164	159		NA	NA	93	15	0	ahg1_2_6_5	0
ahg1	2	Col-0	5	6	9	10	10-Sep	2020	29/10/2020	NA	2	5	164	159		NA	NA	93	16	0	ahg1_2_6_5	0
ahg1	2	Col-0	5	6	9	10	10-Sep	2020	29/10/2020	NA	2	5	164	159		NA	NA	93	17	0	ahg1_2_6_5	0
ahg1	2	Col-0	5	6	9	10	10-Sep	2020	29/10/2020	NA	2	5	164	159		NA	NA	93	18	0	ahg1_2_6_5	0
ahg1	2	Col-0	5	6	9	10	10-Sep	2020	29/10/2020	NA	2	5	164	159		NA	NA	93	19	0	ahg1_2_6_5	0
ahg1	2	Col-0	10	6	9	10	10-Sep	2020	29/10/2020	NA	2	2	193	191		NA	NA	101	1	0	ahg1_2_6_10	0
ahg1	2	Col-0	10	6	9	10	10-Sep	2020	29/10/2020	NA	2	2	193	191		NA	NA	101	2	0	ahg1_2_6_10	0
ahg1	2	Col-0	10	6	9	10	10-Sep	2020	29/10/2020	NA	2	2	193	191		NA	NA	101	3	0	ahg1_2_6_10	0
ahg1	2	Col-0	10	6	9	10	10-Sep	2020	29/10/2020	NA	2	2	193	191		NA	NA	101	4	0	ahg1_2_6_10	0
ahg1	2	Col-0	10	6	9	10	10-Sep	2020	29/10/2020	NA	2	2	193	191		NA	NA	101	5	1	ahg1_2_6_10	0.518134715
ahg1	2	Col-0	10	6	9	10	10-Sep	2020	29/10/2020	NA	2	2	193	191		NA	NA	101	6	0	ahg1_2_6_10	0
ahg1	2	Col-0	10	6	9	10	10-Sep	2020	29/10/2020	NA	2	2	193	191		NA	NA	101	7	0	ahg1_2_6_10	0
ahg1	2	Col-0	10	6	9	10	10-Sep	2020	29/10/2020	NA	2	2	193	191		NA	NA	101	8	0	ahg1_2_6_10	0
ahg1	2	Col-0	10	6	9	10	10-Sep	2020	29/10/2020	NA	2	2	193	191		NA	NA	101	9	0	ahg1_2_6_10	0
ahg1	2	Col-0	10	6	9	10	10-Sep	2020	29/10/2020	NA	2	2	193	191		NA	NA	101	10	0	ahg1_2_6_10	0
ahg1	2	Col-0	10	6	9	10	10-Sep	2020	29/10/2020	NA	2	2	193	191		NA	NA	101	11	0	ahg1_2_6_10	0
ahg1	2	Col-0	10	6	9	10	10-Sep	2020	29/10/2020	NA	2	2	193	191		NA	NA	101	12	0	ahg1_2_6_10	0
ahg1	2	Col-0	10	6	9	10	10-Sep	2020	29/10/2020	NA	2	2	193	191		NA	NA	101	13	1	ahg1_2_6_10	0.518134715
ahg1	2	Col-0	10	6	9	10	10-Sep	2020	29/10/2020	NA	2	2	193	191		NA	NA	101	14	0	ahg1_2_6_10	0
ahg1	2	Col-0	10	6	9	10	10-Sep	2020	29/10/2020	NA	2	2	193	191		NA	NA	101	15	0	ahg1_2_6_10	0
ahg1	2	Col-0	10	6	9	10	10-Sep	2020	29/10/2020	NA	2	2	193	191		NA	NA	101	16	0	ahg1_2_6_10	0
ahg1	2	Col-0	10	6	9	10	10-Sep	2020	29/10/2020	NA	2	2	193	191		NA	NA	101	17	0	ahg1_2_6_10	0
ahg1	2	Col-0	10	6	9	10	10-Sep	2020	29/10/2020	NA	2	2	193	191		NA	NA	101	18	0	ahg1_2_6_10	0
ahg1	2	Col-0	10	6	9	10	10-Sep	2020	29/10/2020	NA	2	2	193	191		NA	NA	101	19	0	ahg1_2_6_10	0
ahg1	2	Col-0	0	9	16	11	16-Nov	2020	04/12/2020	NA	30	159	168	9		NA	NA	196	1	0	ahg1_2_9_0	0
ahg1	2	Col-0	0	9	16	11	16-Nov	2020	04/12/2020	NA	30	159	168	9		NA	NA	196	2	0	ahg1_2_9_0	0
ahg1	2	Col-0	0	9	16	11	16-Nov	2020	04/12/2020	NA	30	159	168	9		NA	NA	196	3	70	ahg1_2_9_0	41.66666667
ahg1	2	Col-0	0	9	16	11	16-Nov	2020	04/12/2020	NA	30	159	168	9		NA	NA	196	4	65	ahg1_2_9_0	38.69047619
ahg1	2	Col-0	0	9	16	11	16-Nov	2020	04/12/2020	NA	30	159	168	9		NA	NA	196	5	21	ahg1_2_9_0	12.5
ahg1	2	Col-0	0	9	16	11	16-Nov	2020	04/12/2020	NA	30	159	168	9		NA	NA	196	6	3	ahg1_2_9_0	1.785714286
ahg1	2	Col-0	0	9	16	11	16-Nov	2020	04/12/2020	NA	30	159	168	9		NA	NA	196	7	0	ahg1_2_9_0	0
ahg1	2	Col-0	0	9	16	11	16-Nov	2020	04/12/2020	NA	30	159	168	9		NA	NA	196	8	0	ahg1_2_9_0	0
ahg1	2	Col-0	0	9	16	11	16-Nov	2020	04/12/2020	NA	30	159	168	9		NA	NA	196	9	0	ahg1_2_9_0	0
ahg1	2	Col-0	0	9	16	11	16-Nov	2020	04/12/2020	NA	30	159	168	9		NA	NA	196	10	0	ahg1_2_9_0	0
ahg1	2	Col-0	0	9	16	11	16-Nov	2020	04/12/2020	NA	30	159	168	9		NA	NA	196	11	0	ahg1_2_9_0	0
ahg1	2	Col-0	0	9	16	11	16-Nov	2020	04/12/2020	NA	30	159	168	9		NA	NA	196	12	0	ahg1_2_9_0	0
ahg1	2	Col-0	0	9	16	11	16-Nov	2020	04/12/2020	NA	30	159	168	9		NA	NA	196	13	0	ahg1_2_9_0	0
ahg1	2	Col-0	0	9	16	11	16-Nov	2020	04/12/2020	NA	30	159	168	9		NA	NA	196	14	0	ahg1_2_9_0	0
ahg1	2	Col-0	0	9	16	11	16-Nov	2020	04/12/2020	NA	30	159	168	9		NA	NA	196	15	0	ahg1_2_9_0	0
ahg1	2	Col-0	0	9	16	11	16-Nov	2020	04/12/2020	NA	30	159	168	9		NA	NA	196	16	0	ahg1_2_9_0	0
ahg1	2	Col-0	0	9	16	11	16-Nov	2020	04/12/2020	NA	30	159	168	9		NA	NA	196	17	0	ahg1_2_9_0	0
ahg1	2	Col-0	0	9	16	11	16-Nov	2020	04/12/2020	NA	30	159	168	9		NA	NA	196	18	0	ahg1_2_9_0	0
ahg1	2	Col-0	1	9	16	11	16-Nov	2020	04/12/2020	NA	30	156	172	16		NA	NA	202	1	0	ahg1_2_9_1	0
ahg1	2	Col-0	1	9	16	11	16-Nov	2020	04/12/2020	NA	30	156	172	16		NA	NA	202	2	0	ahg1_2_9_1	0
ahg1	2	Col-0	1	9	16	11	16-Nov	2020	04/12/2020	NA	30	156	172	16		NA	NA	202	3	4	ahg1_2_9_1	2.325581395
ahg1	2	Col-0	1	9	16	11	16-Nov	2020	04/12/2020	NA	30	156	172	16		NA	NA	202	4	73	ahg1_2_9_1	42.44186047
ahg1	2	Col-0	1	9	16	11	16-Nov	2020	04/12/2020	NA	30	156	172	16		NA	NA	202	5	50	ahg1_2_9_1	29.06976744
ahg1	2	Col-0	1	9	16	11	16-Nov	2020	04/12/2020	NA	30	156	172	16		NA	NA	202	6	20	ahg1_2_9_1	11.62790698
ahg1	2	Col-0	1	9	16	11	16-Nov	2020	04/12/2020	NA	30	156	172	16		NA	NA	202	7	7	ahg1_2_9_1	4.069767442
ahg1	2	Col-0	1	9	16	11	16-Nov	2020	04/12/2020	NA	30	156	172	16		NA	NA	202	8	0	ahg1_2_9_1	0
ahg1	2	Col-0	1	9	16	11	16-Nov	2020	04/12/2020	NA	30	156	172	16		NA	NA	202	9	2	ahg1_2_9_1	1.162790698
ahg1	2	Col-0	1	9	16	11	16-Nov	2020	04/12/2020	NA	30	156	172	16		NA	NA	202	10	0	ahg1_2_9_1	0
ahg1	2	Col-0	1	9	16	11	16-Nov	2020	04/12/2020	NA	30	156	172	16		NA	NA	202	11	0	ahg1_2_9_1	0
ahg1	2	Col-0	1	9	16	11	16-Nov	2020	04/12/2020	NA	30	156	172	16		NA	NA	202	12	0	ahg1_2_9_1	0
ahg1	2	Col-0	1	9	16	11	16-Nov	2020	04/12/2020	NA	30	156	172	16		NA	NA	202	13	0	ahg1_2_9_1	0
ahg1	2	Col-0	1	9	16	11	16-Nov	2020	04/12/2020	NA	30	156	172	16		NA	NA	202	14	0	ahg1_2_9_1	0
ahg1	2	Col-0	1	9	16	11	16-Nov	2020	04/12/2020	NA	30	156	172	16		NA	NA	202	15	0	ahg1_2_9_1	0
ahg1	2	Col-0	1	9	16	11	16-Nov	2020	04/12/2020	NA	30	156	172	16		NA	NA	202	16	0	ahg1_2_9_1	0
ahg1	2	Col-0	1	9	16	11	16-Nov	2020	04/12/2020	NA	30	156	172	16		NA	NA	202	17	0	ahg1_2_9_1	0
ahg1	2	Col-0	1	9	16	11	16-Nov	2020	04/12/2020	NA	30	156	172	16		NA	NA	202	18	0	ahg1_2_9_1	0
ahg1	2	Col-0	5	9	16	11	16-Nov	2020	04/12/2020	NA	30	5	196	191		NA	NA	208	1	0	ahg1_2_9_5	0
ahg1	2	Col-0	5	9	16	11	16-Nov	2020	04/12/2020	NA	30	5	196	191		NA	NA	208	2	0	ahg1_2_9_5	0
ahg1	2	Col-0	5	9	16	11	16-Nov	2020	04/12/2020	NA	30	5	196	191		NA	NA	208	3	0	ahg1_2_9_5	0
ahg1	2	Col-0	5	9	16	11	16-Nov	2020	04/12/2020	NA	30	5	196	191		NA	NA	208	4	0	ahg1_2_9_5	0
ahg1	2	Col-0	5	9	16	11	16-Nov	2020	04/12/2020	NA	30	5	196	191		NA	NA	208	5	0	ahg1_2_9_5	0
ahg1	2	Col-0	5	9	16	11	16-Nov	2020	04/12/2020	NA	30	5	196	191		NA	NA	208	6	2	ahg1_2_9_5	1.020408163
ahg1	2	Col-0	5	9	16	11	16-Nov	2020	04/12/2020	NA	30	5	196	191		NA	NA	208	7	0	ahg1_2_9_5	0
ahg1	2	Col-0	5	9	16	11	16-Nov	2020	04/12/2020	NA	30	5	196	191		NA	NA	208	8	0	ahg1_2_9_5	0
ahg1	2	Col-0	5	9	16	11	16-Nov	2020	04/12/2020	NA	30	5	196	191		NA	NA	208	9	0	ahg1_2_9_5	0
ahg1	2	Col-0	5	9	16	11	16-Nov	2020	04/12/2020	NA	30	5	196	191		NA	NA	208	10	1	ahg1_2_9_5	0.510204082
ahg1	2	Col-0	5	9	16	11	16-Nov	2020	04/12/2020	NA	30	5	196	191		NA	NA	208	11	0	ahg1_2_9_5	0
ahg1	2	Col-0	5	9	16	11	16-Nov	2020	04/12/2020	NA	30	5	196	191		NA	NA	208	12	0	ahg1_2_9_5	0
ahg1	2	Col-0	5	9	16	11	16-Nov	2020	04/12/2020	NA	30	5	196	191		NA	NA	208	13	1	ahg1_2_9_5	0.510204082
ahg1	2	Col-0	5	9	16	11	16-Nov	2020	04/12/2020	NA	30	5	196	191		NA	NA	208	14	0	ahg1_2_9_5	0
ahg1	2	Col-0	5	9	16	11	16-Nov	2020	04/12/2020	NA	30	5	196	191		NA	NA	208	15	1	ahg1_2_9_5	0.510204082
ahg1	2	Col-0	5	9	16	11	16-Nov	2020	04/12/2020	NA	30	5	196	191		NA	NA	208	16	0	ahg1_2_9_5	0
ahg1	2	Col-0	5	9	16	11	16-Nov	2020	04/12/2020	NA	30	5	196	191		NA	NA	208	17	0	ahg1_2_9_5	0
ahg1	2	Col-0	5	9	16	11	16-Nov	2020	04/12/2020	NA	30	5	196	191		NA	NA	208	18	0	ahg1_2_9_5	0
ahg1	2	Col-0	10	9	16	11	16-Nov	2020	04/12/2020	NA	30	0	177	177		NA	NA	214	1	0	ahg1_2_9_10	0
ahg1	2	Col-0	10	9	16	11	16-Nov	2020	04/12/2020	NA	30	0	177	177		NA	NA	214	2	0	ahg1_2_9_10	0
ahg1	2	Col-0	10	9	16	11	16-Nov	2020	04/12/2020	NA	30	0	177	177		NA	NA	214	3	0	ahg1_2_9_10	0
ahg1	2	Col-0	10	9	16	11	16-Nov	2020	04/12/2020	NA	30	0	177	177		NA	NA	214	4	0	ahg1_2_9_10	0
ahg1	2	Col-0	10	9	16	11	16-Nov	2020	04/12/2020	NA	30	0	177	177		NA	NA	214	5	0	ahg1_2_9_10	0
ahg1	2	Col-0	10	9	16	11	16-Nov	2020	04/12/2020	NA	30	0	177	177		NA	NA	214	6	0	ahg1_2_9_10	0
ahg1	2	Col-0	10	9	16	11	16-Nov	2020	04/12/2020	NA	30	0	177	177		NA	NA	214	7	0	ahg1_2_9_10	0
ahg1	2	Col-0	10	9	16	11	16-Nov	2020	04/12/2020	NA	30	0	177	177		NA	NA	214	8	0	ahg1_2_9_10	0
ahg1	2	Col-0	10	9	16	11	16-Nov	2020	04/12/2020	NA	30	0	177	177		NA	NA	214	9	0	ahg1_2_9_10	0
ahg1	2	Col-0	10	9	16	11	16-Nov	2020	04/12/2020	NA	30	0	177	177		NA	NA	214	10	0	ahg1_2_9_10	0
ahg1	2	Col-0	10	9	16	11	16-Nov	2020	04/12/2020	NA	30	0	177	177		NA	NA	214	11	0	ahg1_2_9_10	0
ahg1	2	Col-0	10	9	16	11	16-Nov	2020	04/12/2020	NA	30	0	177	177		NA	NA	214	12	0	ahg1_2_9_10	0
ahg1	2	Col-0	10	9	16	11	16-Nov	2020	04/12/2020	NA	30	0	177	177		NA	NA	214	13	0	ahg1_2_9_10	0
ahg1	2	Col-0	10	9	16	11	16-Nov	2020	04/12/2020	NA	30	0	177	177		NA	NA	214	14	0	ahg1_2_9_10	0
ahg1	2	Col-0	10	9	16	11	16-Nov	2020	04/12/2020	NA	30	0	177	177		NA	NA	214	15	0	ahg1_2_9_10	0
ahg1	2	Col-0	10	9	16	11	16-Nov	2020	04/12/2020	NA	30	0	177	177		NA	NA	214	16	0	ahg1_2_9_10	0
ahg1	2	Col-0	10	9	16	11	16-Nov	2020	04/12/2020	NA	30	0	177	177		NA	NA	214	17	0	ahg1_2_9_10	0
ahg1	2	Col-0	10	9	16	11	16-Nov	2020	04/12/2020	NA	30	0	177	177		NA	NA	214	18	0	ahg1_2_9_10	0
ahg1	3	Col-0	0	6	9	10	10-Sep	2020	29/10/2020	NA	2	87	171	84		NA	NA	102	1	0	ahg1_3_6_0	0
ahg1	3	Col-0	0	6	9	10	10-Sep	2020	29/10/2020	NA	2	87	171	84		NA	NA	102	2	0	ahg1_3_6_0	0
ahg1	3	Col-0	0	6	9	10	10-Sep	2020	29/10/2020	NA	2	87	171	84		NA	NA	102	3	38	ahg1_3_6_0	22.22222222
ahg1	3	Col-0	0	6	9	10	10-Sep	2020	29/10/2020	NA	2	87	171	84		NA	NA	102	4	41	ahg1_3_6_0	23.97660819
ahg1	3	Col-0	0	6	9	10	10-Sep	2020	29/10/2020	NA	2	87	171	84		NA	NA	102	5	6	ahg1_3_6_0	3.50877193
ahg1	3	Col-0	0	6	9	10	10-Sep	2020	29/10/2020	NA	2	87	171	84		NA	NA	102	6	2	ahg1_3_6_0	1.169590643
ahg1	3	Col-0	0	6	9	10	10-Sep	2020	29/10/2020	NA	2	87	171	84		NA	NA	102	7	0	ahg1_3_6_0	0
ahg1	3	Col-0	0	6	9	10	10-Sep	2020	29/10/2020	NA	2	87	171	84		NA	NA	102	8	0	ahg1_3_6_0	0
ahg1	3	Col-0	0	6	9	10	10-Sep	2020	29/10/2020	NA	2	87	171	84		NA	NA	102	9	0	ahg1_3_6_0	0
ahg1	3	Col-0	0	6	9	10	10-Sep	2020	29/10/2020	NA	2	87	171	84		NA	NA	102	10	0	ahg1_3_6_0	0
ahg1	3	Col-0	0	6	9	10	10-Sep	2020	29/10/2020	NA	2	87	171	84		NA	NA	102	11	0	ahg1_3_6_0	0
ahg1	3	Col-0	0	6	9	10	10-Sep	2020	29/10/2020	NA	2	87	171	84		NA	NA	102	12	0	ahg1_3_6_0	0
ahg1	3	Col-0	0	6	9	10	10-Sep	2020	29/10/2020	NA	2	87	171	84		NA	NA	102	13	0	ahg1_3_6_0	0
ahg1	3	Col-0	0	6	9	10	10-Sep	2020	29/10/2020	NA	2	87	171	84		NA	NA	102	14	0	ahg1_3_6_0	0
ahg1	3	Col-0	0	6	9	10	10-Sep	2020	29/10/2020	NA	2	87	171	84		NA	NA	102	15	0	ahg1_3_6_0	0
ahg1	3	Col-0	0	6	9	10	10-Sep	2020	29/10/2020	NA	2	87	171	84		NA	NA	102	16	0	ahg1_3_6_0	0
ahg1	3	Col-0	0	6	9	10	10-Sep	2020	29/10/2020	NA	2	87	171	84		NA	NA	102	17	0	ahg1_3_6_0	0
ahg1	3	Col-0	0	6	9	10	10-Sep	2020	29/10/2020	NA	2	87	171	84		NA	NA	102	18	0	ahg1_3_6_0	0
ahg1	3	Col-0	0	6	9	10	10-Sep	2020	29/10/2020	NA	2	87	171	84		NA	NA	102	19	0	ahg1_3_6_0	0
ahg1	3	Col-0	1	6	9	10	10-Sep	2020	29/10/2020	NA	2	129	174	45		NA	NA	100	1	0	ahg1_3_6_1	0
ahg1	3	Col-0	1	6	9	10	10-Sep	2020	29/10/2020	NA	2	129	174	45		NA	NA	100	2	0	ahg1_3_6_1	0
ahg1	3	Col-0	1	6	9	10	10-Sep	2020	29/10/2020	NA	2	129	174	45		NA	NA	100	3	1	ahg1_3_6_1	0.574712644
ahg1	3	Col-0	1	6	9	10	10-Sep	2020	29/10/2020	NA	2	129	174	45		NA	NA	100	4	55	ahg1_3_6_1	31.6091954
ahg1	3	Col-0	1	6	9	10	10-Sep	2020	29/10/2020	NA	2	129	174	45		NA	NA	100	5	56	ahg1_3_6_1	32.18390805
ahg1	3	Col-0	1	6	9	10	10-Sep	2020	29/10/2020	NA	2	129	174	45		NA	NA	100	6	11	ahg1_3_6_1	6.32183908
ahg1	3	Col-0	1	6	9	10	10-Sep	2020	29/10/2020	NA	2	129	174	45		NA	NA	100	7	5	ahg1_3_6_1	2.873563218
ahg1	3	Col-0	1	6	9	10	10-Sep	2020	29/10/2020	NA	2	129	174	45		NA	NA	100	8	1	ahg1_3_6_1	0.574712644
ahg1	3	Col-0	1	6	9	10	10-Sep	2020	29/10/2020	NA	2	129	174	45		NA	NA	100	9	0	ahg1_3_6_1	0
ahg1	3	Col-0	1	6	9	10	10-Sep	2020	29/10/2020	NA	2	129	174	45		NA	NA	100	10	0	ahg1_3_6_1	0
ahg1	3	Col-0	1	6	9	10	10-Sep	2020	29/10/2020	NA	2	129	174	45		NA	NA	100	11	0	ahg1_3_6_1	0
ahg1	3	Col-0	1	6	9	10	10-Sep	2020	29/10/2020	NA	2	129	174	45		NA	NA	100	12	0	ahg1_3_6_1	0
ahg1	3	Col-0	1	6	9	10	10-Sep	2020	29/10/2020	NA	2	129	174	45		NA	NA	100	13	0	ahg1_3_6_1	0
ahg1	3	Col-0	1	6	9	10	10-Sep	2020	29/10/2020	NA	2	129	174	45		NA	NA	100	14	0	ahg1_3_6_1	0
ahg1	3	Col-0	1	6	9	10	10-Sep	2020	29/10/2020	NA	2	129	174	45		NA	NA	100	15	0	ahg1_3_6_1	0
ahg1	3	Col-0	1	6	9	10	10-Sep	2020	29/10/2020	NA	2	129	174	45		NA	NA	100	16	0	ahg1_3_6_1	0
ahg1	3	Col-0	1	6	9	10	10-Sep	2020	29/10/2020	NA	2	129	174	45		NA	NA	100	17	0	ahg1_3_6_1	0
ahg1	3	Col-0	1	6	9	10	10-Sep	2020	29/10/2020	NA	2	129	174	45		NA	NA	100	18	0	ahg1_3_6_1	0
ahg1	3	Col-0	1	6	9	10	10-Sep	2020	29/10/2020	NA	2	129	174	45		NA	NA	100	19	0	ahg1_3_6_1	0
ahg1	3	Col-0	5	6	9	10	10-Sep	2020	29/10/2020	NA	2	7	161	154		NA	NA	96	1	0	ahg1_3_6_5	0
ahg1	3	Col-0	5	6	9	10	10-Sep	2020	29/10/2020	NA	2	7	161	154		NA	NA	96	2	0	ahg1_3_6_5	0
ahg1	3	Col-0	5	6	9	10	10-Sep	2020	29/10/2020	NA	2	7	161	154		NA	NA	96	3	0	ahg1_3_6_5	0
ahg1	3	Col-0	5	6	9	10	10-Sep	2020	29/10/2020	NA	2	7	161	154		NA	NA	96	4	0	ahg1_3_6_5	0
ahg1	3	Col-0	5	6	9	10	10-Sep	2020	29/10/2020	NA	2	7	161	154		NA	NA	96	5	6	ahg1_3_6_5	3.726708075
ahg1	3	Col-0	5	6	9	10	10-Sep	2020	29/10/2020	NA	2	7	161	154		NA	NA	96	6	1	ahg1_3_6_5	0.621118012
ahg1	3	Col-0	5	6	9	10	10-Sep	2020	29/10/2020	NA	2	7	161	154		NA	NA	96	7	0	ahg1_3_6_5	0
ahg1	3	Col-0	5	6	9	10	10-Sep	2020	29/10/2020	NA	2	7	161	154		NA	NA	96	8	0	ahg1_3_6_5	0
ahg1	3	Col-0	5	6	9	10	10-Sep	2020	29/10/2020	NA	2	7	161	154		NA	NA	96	9	0	ahg1_3_6_5	0
ahg1	3	Col-0	5	6	9	10	10-Sep	2020	29/10/2020	NA	2	7	161	154		NA	NA	96	10	0	ahg1_3_6_5	0
ahg1	3	Col-0	5	6	9	10	10-Sep	2020	29/10/2020	NA	2	7	161	154		NA	NA	96	11	0	ahg1_3_6_5	0
ahg1	3	Col-0	5	6	9	10	10-Sep	2020	29/10/2020	NA	2	7	161	154		NA	NA	96	12	0	ahg1_3_6_5	0
ahg1	3	Col-0	5	6	9	10	10-Sep	2020	29/10/2020	NA	2	7	161	154		NA	NA	96	13	0	ahg1_3_6_5	0
ahg1	3	Col-0	5	6	9	10	10-Sep	2020	29/10/2020	NA	2	7	161	154		NA	NA	96	14	0	ahg1_3_6_5	0
ahg1	3	Col-0	5	6	9	10	10-Sep	2020	29/10/2020	NA	2	7	161	154		NA	NA	96	15	0	ahg1_3_6_5	0
ahg1	3	Col-0	5	6	9	10	10-Sep	2020	29/10/2020	NA	2	7	161	154		NA	NA	96	16	0	ahg1_3_6_5	0
ahg1	3	Col-0	5	6	9	10	10-Sep	2020	29/10/2020	NA	2	7	161	154		NA	NA	96	17	0	ahg1_3_6_5	0
ahg1	3	Col-0	5	6	9	10	10-Sep	2020	29/10/2020	NA	2	7	161	154		NA	NA	96	18	0	ahg1_3_6_5	0
ahg1	3	Col-0	5	6	9	10	10-Sep	2020	29/10/2020	NA	2	7	161	154		NA	NA	96	19	0	ahg1_3_6_5	0
ahg1	3	Col-0	10	6	9	10	10-Sep	2020	29/10/2020	NA	2	1	188	187		NA	NA	94	1	0	ahg1_3_6_10	0
ahg1	3	Col-0	10	6	9	10	10-Sep	2020	29/10/2020	NA	2	1	188	187		NA	NA	94	2	0	ahg1_3_6_10	0
ahg1	3	Col-0	10	6	9	10	10-Sep	2020	29/10/2020	NA	2	1	188	187		NA	NA	94	3	0	ahg1_3_6_10	0
ahg1	3	Col-0	10	6	9	10	10-Sep	2020	29/10/2020	NA	2	1	188	187		NA	NA	94	4	0	ahg1_3_6_10	0
ahg1	3	Col-0	10	6	9	10	10-Sep	2020	29/10/2020	NA	2	1	188	187		NA	NA	94	5	0	ahg1_3_6_10	0
ahg1	3	Col-0	10	6	9	10	10-Sep	2020	29/10/2020	NA	2	1	188	187		NA	NA	94	6	0	ahg1_3_6_10	0
ahg1	3	Col-0	10	6	9	10	10-Sep	2020	29/10/2020	NA	2	1	188	187		NA	NA	94	7	0	ahg1_3_6_10	0
ahg1	3	Col-0	10	6	9	10	10-Sep	2020	29/10/2020	NA	2	1	188	187		NA	NA	94	8	0	ahg1_3_6_10	0
ahg1	3	Col-0	10	6	9	10	10-Sep	2020	29/10/2020	NA	2	1	188	187		NA	NA	94	9	0	ahg1_3_6_10	0
ahg1	3	Col-0	10	6	9	10	10-Sep	2020	29/10/2020	NA	2	1	188	187		NA	NA	94	10	0	ahg1_3_6_10	0
ahg1	3	Col-0	10	6	9	10	10-Sep	2020	29/10/2020	NA	2	1	188	187		NA	NA	94	11	0	ahg1_3_6_10	0
ahg1	3	Col-0	10	6	9	10	10-Sep	2020	29/10/2020	NA	2	1	188	187		NA	NA	94	12	1	ahg1_3_6_10	0.531914894
ahg1	3	Col-0	10	6	9	10	10-Sep	2020	29/10/2020	NA	2	1	188	187		NA	NA	94	13	0	ahg1_3_6_10	0
ahg1	3	Col-0	10	6	9	10	10-Sep	2020	29/10/2020	NA	2	1	188	187		NA	NA	94	14	0	ahg1_3_6_10	0
ahg1	3	Col-0	10	6	9	10	10-Sep	2020	29/10/2020	NA	2	1	188	187		NA	NA	94	15	0	ahg1_3_6_10	0
ahg1	3	Col-0	10	6	9	10	10-Sep	2020	29/10/2020	NA	2	1	188	187		NA	NA	94	16	0	ahg1_3_6_10	0
ahg1	3	Col-0	10	6	9	10	10-Sep	2020	29/10/2020	NA	2	1	188	187		NA	NA	94	17	0	ahg1_3_6_10	0
ahg1	3	Col-0	10	6	9	10	10-Sep	2020	29/10/2020	NA	2	1	188	187		NA	NA	94	18	0	ahg1_3_6_10	0
ahg1	3	Col-0	10	6	9	10	10-Sep	2020	29/10/2020	NA	2	1	188	187		NA	NA	94	19	0	ahg1_3_6_10	0
ahg1	3	Col-0	0	9	16	11	16-Nov	2020	04/12/2020	NA	30	134	148	14		NA	NA	197	1	0	ahg1_3_9_0	0
ahg1	3	Col-0	0	9	16	11	16-Nov	2020	04/12/2020	NA	30	134	148	14		NA	NA	197	2	0	ahg1_3_9_0	0
ahg1	3	Col-0	0	9	16	11	16-Nov	2020	04/12/2020	NA	30	134	148	14		NA	NA	197	3	31	ahg1_3_9_0	20.94594595
ahg1	3	Col-0	0	9	16	11	16-Nov	2020	04/12/2020	NA	30	134	148	14		NA	NA	197	4	63	ahg1_3_9_0	42.56756757
ahg1	3	Col-0	0	9	16	11	16-Nov	2020	04/12/2020	NA	30	134	148	14		NA	NA	197	5	33	ahg1_3_9_0	22.2972973
ahg1	3	Col-0	0	9	16	11	16-Nov	2020	04/12/2020	NA	30	134	148	14		NA	NA	197	6	6	ahg1_3_9_0	4.054054054
ahg1	3	Col-0	0	9	16	11	16-Nov	2020	04/12/2020	NA	30	134	148	14		NA	NA	197	7	1	ahg1_3_9_0	0.675675676
ahg1	3	Col-0	0	9	16	11	16-Nov	2020	04/12/2020	NA	30	134	148	14		NA	NA	197	8	0	ahg1_3_9_0	0
ahg1	3	Col-0	0	9	16	11	16-Nov	2020	04/12/2020	NA	30	134	148	14		NA	NA	197	9	0	ahg1_3_9_0	0
ahg1	3	Col-0	0	9	16	11	16-Nov	2020	04/12/2020	NA	30	134	148	14		NA	NA	197	10	0	ahg1_3_9_0	0
ahg1	3	Col-0	0	9	16	11	16-Nov	2020	04/12/2020	NA	30	134	148	14		NA	NA	197	11	0	ahg1_3_9_0	0
ahg1	3	Col-0	0	9	16	11	16-Nov	2020	04/12/2020	NA	30	134	148	14		NA	NA	197	12	0	ahg1_3_9_0	0
ahg1	3	Col-0	0	9	16	11	16-Nov	2020	04/12/2020	NA	30	134	148	14		NA	NA	197	13	0	ahg1_3_9_0	0
ahg1	3	Col-0	0	9	16	11	16-Nov	2020	04/12/2020	NA	30	134	148	14		NA	NA	197	14	0	ahg1_3_9_0	0
ahg1	3	Col-0	0	9	16	11	16-Nov	2020	04/12/2020	NA	30	134	148	14		NA	NA	197	15	0	ahg1_3_9_0	0
ahg1	3	Col-0	0	9	16	11	16-Nov	2020	04/12/2020	NA	30	134	148	14		NA	NA	197	16	0	ahg1_3_9_0	0
ahg1	3	Col-0	0	9	16	11	16-Nov	2020	04/12/2020	NA	30	134	148	14		NA	NA	197	17	0	ahg1_3_9_0	0
ahg1	3	Col-0	0	9	16	11	16-Nov	2020	04/12/2020	NA	30	134	148	14		NA	NA	197	18	0	ahg1_3_9_0	0
ahg1	3	Col-0	1	9	16	11	16-Nov	2020	04/12/2020	NA	30	170	177	7		NA	NA	203	1	0	ahg1_3_9_1	0
ahg1	3	Col-0	1	9	16	11	16-Nov	2020	04/12/2020	NA	30	170	177	7		NA	NA	203	2	0	ahg1_3_9_1	0
ahg1	3	Col-0	1	9	16	11	16-Nov	2020	04/12/2020	NA	30	170	177	7		NA	NA	203	3	3	ahg1_3_9_1	1.694915254
ahg1	3	Col-0	1	9	16	11	16-Nov	2020	04/12/2020	NA	30	170	177	7		NA	NA	203	4	50	ahg1_3_9_1	28.24858757
ahg1	3	Col-0	1	9	16	11	16-Nov	2020	04/12/2020	NA	30	170	177	7		NA	NA	203	5	78	ahg1_3_9_1	44.06779661
ahg1	3	Col-0	1	9	16	11	16-Nov	2020	04/12/2020	NA	30	170	177	7		NA	NA	203	6	23	ahg1_3_9_1	12.99435028
ahg1	3	Col-0	1	9	16	11	16-Nov	2020	04/12/2020	NA	30	170	177	7		NA	NA	203	7	11	ahg1_3_9_1	6.214689266
ahg1	3	Col-0	1	9	16	11	16-Nov	2020	04/12/2020	NA	30	170	177	7		NA	NA	203	8	0	ahg1_3_9_1	0
ahg1	3	Col-0	1	9	16	11	16-Nov	2020	04/12/2020	NA	30	170	177	7		NA	NA	203	9	5	ahg1_3_9_1	2.824858757
ahg1	3	Col-0	1	9	16	11	16-Nov	2020	04/12/2020	NA	30	170	177	7		NA	NA	203	10	0	ahg1_3_9_1	0
ahg1	3	Col-0	1	9	16	11	16-Nov	2020	04/12/2020	NA	30	170	177	7		NA	NA	203	11	0	ahg1_3_9_1	0
ahg1	3	Col-0	1	9	16	11	16-Nov	2020	04/12/2020	NA	30	170	177	7		NA	NA	203	12	0	ahg1_3_9_1	0
ahg1	3	Col-0	1	9	16	11	16-Nov	2020	04/12/2020	NA	30	170	177	7		NA	NA	203	13	0	ahg1_3_9_1	0
ahg1	3	Col-0	1	9	16	11	16-Nov	2020	04/12/2020	NA	30	170	177	7		NA	NA	203	14	0	ahg1_3_9_1	0
ahg1	3	Col-0	1	9	16	11	16-Nov	2020	04/12/2020	NA	30	170	177	7		NA	NA	203	15	0	ahg1_3_9_1	0
ahg1	3	Col-0	1	9	16	11	16-Nov	2020	04/12/2020	NA	30	170	177	7		NA	NA	203	16	0	ahg1_3_9_1	0
ahg1	3	Col-0	1	9	16	11	16-Nov	2020	04/12/2020	NA	30	170	177	7		NA	NA	203	17	0	ahg1_3_9_1	0
ahg1	3	Col-0	1	9	16	11	16-Nov	2020	04/12/2020	NA	30	170	177	7		NA	NA	203	18	0	ahg1_3_9_1	0
ahg1	3	Col-0	5	9	16	11	16-Nov	2020	04/12/2020	NA	30	3	170	167		NA	NA	209	1	0	ahg1_3_9_5	0
ahg1	3	Col-0	5	9	16	11	16-Nov	2020	04/12/2020	NA	30	3	170	167		NA	NA	209	2	0	ahg1_3_9_5	0
ahg1	3	Col-0	5	9	16	11	16-Nov	2020	04/12/2020	NA	30	3	170	167		NA	NA	209	3	0	ahg1_3_9_5	0
ahg1	3	Col-0	5	9	16	11	16-Nov	2020	04/12/2020	NA	30	3	170	167		NA	NA	209	4	0	ahg1_3_9_5	0
ahg1	3	Col-0	5	9	16	11	16-Nov	2020	04/12/2020	NA	30	3	170	167		NA	NA	209	5	1	ahg1_3_9_5	0.588235294
ahg1	3	Col-0	5	9	16	11	16-Nov	2020	04/12/2020	NA	30	3	170	167		NA	NA	209	6	0	ahg1_3_9_5	0
ahg1	3	Col-0	5	9	16	11	16-Nov	2020	04/12/2020	NA	30	3	170	167		NA	NA	209	7	0	ahg1_3_9_5	0
ahg1	3	Col-0	5	9	16	11	16-Nov	2020	04/12/2020	NA	30	3	170	167		NA	NA	209	8	0	ahg1_3_9_5	0
ahg1	3	Col-0	5	9	16	11	16-Nov	2020	04/12/2020	NA	30	3	170	167		NA	NA	209	9	1	ahg1_3_9_5	0.588235294
ahg1	3	Col-0	5	9	16	11	16-Nov	2020	04/12/2020	NA	30	3	170	167		NA	NA	209	10	0	ahg1_3_9_5	0
ahg1	3	Col-0	5	9	16	11	16-Nov	2020	04/12/2020	NA	30	3	170	167		NA	NA	209	11	0	ahg1_3_9_5	0
ahg1	3	Col-0	5	9	16	11	16-Nov	2020	04/12/2020	NA	30	3	170	167		NA	NA	209	12	0	ahg1_3_9_5	0
ahg1	3	Col-0	5	9	16	11	16-Nov	2020	04/12/2020	NA	30	3	170	167		NA	NA	209	13	0	ahg1_3_9_5	0
ahg1	3	Col-0	5	9	16	11	16-Nov	2020	04/12/2020	NA	30	3	170	167		NA	NA	209	14	0	ahg1_3_9_5	0
ahg1	3	Col-0	5	9	16	11	16-Nov	2020	04/12/2020	NA	30	3	170	167		NA	NA	209	15	0	ahg1_3_9_5	0
ahg1	3	Col-0	5	9	16	11	16-Nov	2020	04/12/2020	NA	30	3	170	167		NA	NA	209	16	1	ahg1_3_9_5	0.588235294
ahg1	3	Col-0	5	9	16	11	16-Nov	2020	04/12/2020	NA	30	3	170	167		NA	NA	209	17	0	ahg1_3_9_5	0
ahg1	3	Col-0	5	9	16	11	16-Nov	2020	04/12/2020	NA	30	3	170	167		NA	NA	209	18	0	ahg1_3_9_5	0
ahg1	3	Col-0	10	9	16	11	16-Nov	2020	04/12/2020	NA	30	0	180	180		NA	NA	215	1	0	ahg1_3_9_10	0
ahg1	3	Col-0	10	9	16	11	16-Nov	2020	04/12/2020	NA	30	0	180	180		NA	NA	215	2	0	ahg1_3_9_10	0
ahg1	3	Col-0	10	9	16	11	16-Nov	2020	04/12/2020	NA	30	0	180	180		NA	NA	215	3	0	ahg1_3_9_10	0
ahg1	3	Col-0	10	9	16	11	16-Nov	2020	04/12/2020	NA	30	0	180	180		NA	NA	215	4	0	ahg1_3_9_10	0
ahg1	3	Col-0	10	9	16	11	16-Nov	2020	04/12/2020	NA	30	0	180	180		NA	NA	215	5	0	ahg1_3_9_10	0
ahg1	3	Col-0	10	9	16	11	16-Nov	2020	04/12/2020	NA	30	0	180	180		NA	NA	215	6	0	ahg1_3_9_10	0
ahg1	3	Col-0	10	9	16	11	16-Nov	2020	04/12/2020	NA	30	0	180	180		NA	NA	215	7	0	ahg1_3_9_10	0
ahg1	3	Col-0	10	9	16	11	16-Nov	2020	04/12/2020	NA	30	0	180	180		NA	NA	215	8	0	ahg1_3_9_10	0
ahg1	3	Col-0	10	9	16	11	16-Nov	2020	04/12/2020	NA	30	0	180	180		NA	NA	215	9	0	ahg1_3_9_10	0
ahg1	3	Col-0	10	9	16	11	16-Nov	2020	04/12/2020	NA	30	0	180	180		NA	NA	215	10	0	ahg1_3_9_10	0
ahg1	3	Col-0	10	9	16	11	16-Nov	2020	04/12/2020	NA	30	0	180	180		NA	NA	215	11	0	ahg1_3_9_10	0
ahg1	3	Col-0	10	9	16	11	16-Nov	2020	04/12/2020	NA	30	0	180	180		NA	NA	215	12	0	ahg1_3_9_10	0
ahg1	3	Col-0	10	9	16	11	16-Nov	2020	04/12/2020	NA	30	0	180	180		NA	NA	215	13	0	ahg1_3_9_10	0
ahg1	3	Col-0	10	9	16	11	16-Nov	2020	04/12/2020	NA	30	0	180	180		NA	NA	215	14	0	ahg1_3_9_10	0
ahg1	3	Col-0	10	9	16	11	16-Nov	2020	04/12/2020	NA	30	0	180	180		NA	NA	215	15	0	ahg1_3_9_10	0
ahg1	3	Col-0	10	9	16	11	16-Nov	2020	04/12/2020	NA	30	0	180	180		NA	NA	215	16	0	ahg1_3_9_10	0
ahg1	3	Col-0	10	9	16	11	16-Nov	2020	04/12/2020	NA	30	0	180	180		NA	NA	215	17	0	ahg1_3_9_10	0
ahg1	3	Col-0	10	9	16	11	16-Nov	2020	04/12/2020	NA	30	0	180	180		NA	NA	215	18	0	ahg1_3_9_10	0
ahg1	4	Col-0	0	9	16	11	16-Nov	2020	04/12/2020	NA	30	149	170	21		NA	NA	198	1	0	ahg1_4_9_0	0
ahg1	4	Col-0	0	9	16	11	16-Nov	2020	04/12/2020	NA	30	149	170	21		NA	NA	198	2	0	ahg1_4_9_0	0
ahg1	4	Col-0	0	9	16	11	16-Nov	2020	04/12/2020	NA	30	149	170	21		NA	NA	198	3	49	ahg1_4_9_0	28.82352941
ahg1	4	Col-0	0	9	16	11	16-Nov	2020	04/12/2020	NA	30	149	170	21		NA	NA	198	4	64	ahg1_4_9_0	37.64705882
ahg1	4	Col-0	0	9	16	11	16-Nov	2020	04/12/2020	NA	30	149	170	21		NA	NA	198	5	28	ahg1_4_9_0	16.47058824
ahg1	4	Col-0	0	9	16	11	16-Nov	2020	04/12/2020	NA	30	149	170	21		NA	NA	198	6	8	ahg1_4_9_0	4.705882353
ahg1	4	Col-0	0	9	16	11	16-Nov	2020	04/12/2020	NA	30	149	170	21		NA	NA	198	7	0	ahg1_4_9_0	0
ahg1	4	Col-0	0	9	16	11	16-Nov	2020	04/12/2020	NA	30	149	170	21		NA	NA	198	8	0	ahg1_4_9_0	0
ahg1	4	Col-0	0	9	16	11	16-Nov	2020	04/12/2020	NA	30	149	170	21		NA	NA	198	9	0	ahg1_4_9_0	0
ahg1	4	Col-0	0	9	16	11	16-Nov	2020	04/12/2020	NA	30	149	170	21		NA	NA	198	10	0	ahg1_4_9_0	0
ahg1	4	Col-0	0	9	16	11	16-Nov	2020	04/12/2020	NA	30	149	170	21		NA	NA	198	11	0	ahg1_4_9_0	0
ahg1	4	Col-0	0	9	16	11	16-Nov	2020	04/12/2020	NA	30	149	170	21		NA	NA	198	12	0	ahg1_4_9_0	0
ahg1	4	Col-0	0	9	16	11	16-Nov	2020	04/12/2020	NA	30	149	170	21		NA	NA	198	13	0	ahg1_4_9_0	0
ahg1	4	Col-0	0	9	16	11	16-Nov	2020	04/12/2020	NA	30	149	170	21		NA	NA	198	14	0	ahg1_4_9_0	0
ahg1	4	Col-0	0	9	16	11	16-Nov	2020	04/12/2020	NA	30	149	170	21		NA	NA	198	15	0	ahg1_4_9_0	0
ahg1	4	Col-0	0	9	16	11	16-Nov	2020	04/12/2020	NA	30	149	170	21		NA	NA	198	16	0	ahg1_4_9_0	0
ahg1	4	Col-0	0	9	16	11	16-Nov	2020	04/12/2020	NA	30	149	170	21		NA	NA	198	17	0	ahg1_4_9_0	0
ahg1	4	Col-0	0	9	16	11	16-Nov	2020	04/12/2020	NA	30	149	170	21		NA	NA	198	18	0	ahg1_4_9_0	0
ahg1	4	Col-0	1	9	16	11	16-Nov	2020	04/12/2020	NA	30	161	175	14		NA	NA	204	1	0	ahg1_4_9_1	0
ahg1	4	Col-0	1	9	16	11	16-Nov	2020	04/12/2020	NA	30	161	175	14		NA	NA	204	2	0	ahg1_4_9_1	0
ahg1	4	Col-0	1	9	16	11	16-Nov	2020	04/12/2020	NA	30	161	175	14		NA	NA	204	3	4	ahg1_4_9_1	2.285714286
ahg1	4	Col-0	1	9	16	11	16-Nov	2020	04/12/2020	NA	30	161	175	14		NA	NA	204	4	90	ahg1_4_9_1	51.42857143
ahg1	4	Col-0	1	9	16	11	16-Nov	2020	04/12/2020	NA	30	161	175	14		NA	NA	204	5	48	ahg1_4_9_1	27.42857143
ahg1	4	Col-0	1	9	16	11	16-Nov	2020	04/12/2020	NA	30	161	175	14		NA	NA	204	6	10	ahg1_4_9_1	5.714285714
ahg1	4	Col-0	1	9	16	11	16-Nov	2020	04/12/2020	NA	30	161	175	14		NA	NA	204	7	6	ahg1_4_9_1	3.428571429
ahg1	4	Col-0	1	9	16	11	16-Nov	2020	04/12/2020	NA	30	161	175	14		NA	NA	204	8	0	ahg1_4_9_1	0
ahg1	4	Col-0	1	9	16	11	16-Nov	2020	04/12/2020	NA	30	161	175	14		NA	NA	204	9	2	ahg1_4_9_1	1.142857143
ahg1	4	Col-0	1	9	16	11	16-Nov	2020	04/12/2020	NA	30	161	175	14		NA	NA	204	10	0	ahg1_4_9_1	0
ahg1	4	Col-0	1	9	16	11	16-Nov	2020	04/12/2020	NA	30	161	175	14		NA	NA	204	11	1	ahg1_4_9_1	0.571428571
ahg1	4	Col-0	1	9	16	11	16-Nov	2020	04/12/2020	NA	30	161	175	14		NA	NA	204	12	0	ahg1_4_9_1	0
ahg1	4	Col-0	1	9	16	11	16-Nov	2020	04/12/2020	NA	30	161	175	14		NA	NA	204	13	0	ahg1_4_9_1	0
ahg1	4	Col-0	1	9	16	11	16-Nov	2020	04/12/2020	NA	30	161	175	14		NA	NA	204	14	0	ahg1_4_9_1	0
ahg1	4	Col-0	1	9	16	11	16-Nov	2020	04/12/2020	NA	30	161	175	14		NA	NA	204	15	0	ahg1_4_9_1	0
ahg1	4	Col-0	1	9	16	11	16-Nov	2020	04/12/2020	NA	30	161	175	14		NA	NA	204	16	0	ahg1_4_9_1	0
ahg1	4	Col-0	1	9	16	11	16-Nov	2020	04/12/2020	NA	30	161	175	14		NA	NA	204	17	0	ahg1_4_9_1	0
ahg1	4	Col-0	1	9	16	11	16-Nov	2020	04/12/2020	NA	30	161	175	14		NA	NA	204	18	0	ahg1_4_9_1	0
ahg1	4	Col-0	5	9	16	11	16-Nov	2020	04/12/2020	NA	30	11	176	165		NA	NA	210	1	0	ahg1_4_9_5	0
ahg1	4	Col-0	5	9	16	11	16-Nov	2020	04/12/2020	NA	30	11	176	165		NA	NA	210	2	0	ahg1_4_9_5	0
ahg1	4	Col-0	5	9	16	11	16-Nov	2020	04/12/2020	NA	30	11	176	165		NA	NA	210	3	0	ahg1_4_9_5	0
ahg1	4	Col-0	5	9	16	11	16-Nov	2020	04/12/2020	NA	30	11	176	165		NA	NA	210	4	0	ahg1_4_9_5	0
ahg1	4	Col-0	5	9	16	11	16-Nov	2020	04/12/2020	NA	30	11	176	165		NA	NA	210	5	3	ahg1_4_9_5	1.704545455
ahg1	4	Col-0	5	9	16	11	16-Nov	2020	04/12/2020	NA	30	11	176	165		NA	NA	210	6	1	ahg1_4_9_5	0.568181818
ahg1	4	Col-0	5	9	16	11	16-Nov	2020	04/12/2020	NA	30	11	176	165		NA	NA	210	7	1	ahg1_4_9_5	0.568181818
ahg1	4	Col-0	5	9	16	11	16-Nov	2020	04/12/2020	NA	30	11	176	165		NA	NA	210	8	0	ahg1_4_9_5	0
ahg1	4	Col-0	5	9	16	11	16-Nov	2020	04/12/2020	NA	30	11	176	165		NA	NA	210	9	0	ahg1_4_9_5	0
ahg1	4	Col-0	5	9	16	11	16-Nov	2020	04/12/2020	NA	30	11	176	165		NA	NA	210	10	0	ahg1_4_9_5	0
ahg1	4	Col-0	5	9	16	11	16-Nov	2020	04/12/2020	NA	30	11	176	165		NA	NA	210	11	3	ahg1_4_9_5	1.704545455
ahg1	4	Col-0	5	9	16	11	16-Nov	2020	04/12/2020	NA	30	11	176	165		NA	NA	210	12	0	ahg1_4_9_5	0
ahg1	4	Col-0	5	9	16	11	16-Nov	2020	04/12/2020	NA	30	11	176	165		NA	NA	210	13	0	ahg1_4_9_5	0
ahg1	4	Col-0	5	9	16	11	16-Nov	2020	04/12/2020	NA	30	11	176	165		NA	NA	210	14	2	ahg1_4_9_5	1.136363636
ahg1	4	Col-0	5	9	16	11	16-Nov	2020	04/12/2020	NA	30	11	176	165		NA	NA	210	15	0	ahg1_4_9_5	0
ahg1	4	Col-0	5	9	16	11	16-Nov	2020	04/12/2020	NA	30	11	176	165		NA	NA	210	16	1	ahg1_4_9_5	0.568181818
ahg1	4	Col-0	5	9	16	11	16-Nov	2020	04/12/2020	NA	30	11	176	165		NA	NA	210	17	0	ahg1_4_9_5	0
ahg1	4	Col-0	5	9	16	11	16-Nov	2020	04/12/2020	NA	30	11	176	165		NA	NA	210	18	0	ahg1_4_9_5	0
ahg1	4	Col-0	10	9	16	11	16-Nov	2020	04/12/2020	NA	30	0	186	186		NA	NA	216	1	0	ahg1_4_9_10	0
ahg1	4	Col-0	10	9	16	11	16-Nov	2020	04/12/2020	NA	30	0	186	186		NA	NA	216	2	0	ahg1_4_9_10	0
ahg1	4	Col-0	10	9	16	11	16-Nov	2020	04/12/2020	NA	30	0	186	186		NA	NA	216	3	0	ahg1_4_9_10	0
ahg1	4	Col-0	10	9	16	11	16-Nov	2020	04/12/2020	NA	30	0	186	186		NA	NA	216	4	0	ahg1_4_9_10	0
ahg1	4	Col-0	10	9	16	11	16-Nov	2020	04/12/2020	NA	30	0	186	186		NA	NA	216	5	0	ahg1_4_9_10	0
ahg1	4	Col-0	10	9	16	11	16-Nov	2020	04/12/2020	NA	30	0	186	186		NA	NA	216	6	0	ahg1_4_9_10	0
ahg1	4	Col-0	10	9	16	11	16-Nov	2020	04/12/2020	NA	30	0	186	186		NA	NA	216	7	0	ahg1_4_9_10	0
ahg1	4	Col-0	10	9	16	11	16-Nov	2020	04/12/2020	NA	30	0	186	186		NA	NA	216	8	0	ahg1_4_9_10	0
ahg1	4	Col-0	10	9	16	11	16-Nov	2020	04/12/2020	NA	30	0	186	186		NA	NA	216	9	0	ahg1_4_9_10	0
ahg1	4	Col-0	10	9	16	11	16-Nov	2020	04/12/2020	NA	30	0	186	186		NA	NA	216	10	0	ahg1_4_9_10	0
ahg1	4	Col-0	10	9	16	11	16-Nov	2020	04/12/2020	NA	30	0	186	186		NA	NA	216	11	0	ahg1_4_9_10	0
ahg1	4	Col-0	10	9	16	11	16-Nov	2020	04/12/2020	NA	30	0	186	186		NA	NA	216	12	0	ahg1_4_9_10	0
ahg1	4	Col-0	10	9	16	11	16-Nov	2020	04/12/2020	NA	30	0	186	186		NA	NA	216	13	0	ahg1_4_9_10	0
ahg1	4	Col-0	10	9	16	11	16-Nov	2020	04/12/2020	NA	30	0	186	186		NA	NA	216	14	0	ahg1_4_9_10	0
ahg1	4	Col-0	10	9	16	11	16-Nov	2020	04/12/2020	NA	30	0	186	186		NA	NA	216	15	0	ahg1_4_9_10	0
ahg1	4	Col-0	10	9	16	11	16-Nov	2020	04/12/2020	NA	30	0	186	186		NA	NA	216	16	0	ahg1_4_9_10	0
ahg1	4	Col-0	10	9	16	11	16-Nov	2020	04/12/2020	NA	30	0	186	186		NA	NA	216	17	0	ahg1_4_9_10	0
ahg1	4	Col-0	10	9	16	11	16-Nov	2020	04/12/2020	NA	30	0	186	186		NA	NA	216	18	0	ahg1_4_9_10	0
ANAC060 S_012554C	1	Col-0	0	3	NA	NA	30-Jan	2018	28-Feb	NA	1	110	133	23	all these 23 germinated after the scoring period	NA	NA	31	1	0	ANAC060 S_012554C_1_3_0	0
ANAC060 S_012554C	1	Col-0	0	3	NA	NA	30-Jan	2018	28-Feb	NA	1	110	133	23	all these 23 germinated after the scoring period	NA	NA	31	2	0	ANAC060 S_012554C_1_3_0	0
ANAC060 S_012554C	1	Col-0	0	3	NA	NA	30-Jan	2018	28-Feb	NA	1	110	133	23	all these 23 germinated after the scoring period	NA	NA	31	3	12	ANAC060 S_012554C_1_3_0	9.022556391
ANAC060 S_012554C	1	Col-0	0	3	NA	NA	30-Jan	2018	28-Feb	NA	1	110	133	23	all these 23 germinated after the scoring period	NA	NA	31	4	46	ANAC060 S_012554C_1_3_0	34.58646617
ANAC060 S_012554C	1	Col-0	0	3	NA	NA	30-Jan	2018	28-Feb	NA	1	110	133	23	all these 23 germinated after the scoring period	NA	NA	31	5	43	ANAC060 S_012554C_1_3_0	32.33082707
ANAC060 S_012554C	1	Col-0	0	3	NA	NA	30-Jan	2018	28-Feb	NA	1	110	133	23	all these 23 germinated after the scoring period	NA	NA	31	6	9	ANAC060 S_012554C_1_3_0	6.766917293
ANAC060 S_012554C	1	Col-0	0	3	NA	NA	30-Jan	2018	28-Feb	NA	1	110	133	23	all these 23 germinated after the scoring period	NA	NA	31	7	0	ANAC060 S_012554C_1_3_0	0
ANAC060 S_012554C	1	Col-0	0	3	NA	NA	30-Jan	2018	28-Feb	NA	1	110	133	23	all these 23 germinated after the scoring period	NA	NA	31	8	0	ANAC060 S_012554C_1_3_0	0
ANAC060 S_012554C	1	Col-0	0	3	NA	NA	30-Jan	2018	28-Feb	NA	1	110	133	23	all these 23 germinated after the scoring period	NA	NA	31	9	0	ANAC060 S_012554C_1_3_0	0
ANAC060 S_012554C	1	Col-0	0	3	NA	NA	30-Jan	2018	28-Feb	NA	1	110	133	23	all these 23 germinated after the scoring period	NA	NA	31	10	0	ANAC060 S_012554C_1_3_0	0
ANAC060 S_012554C	1	Col-0	0	4	NA	NA	26-Feb	2018	08-Mar	NA	7	123	123	0		NA	NA	33	1	0	ANAC060 S_012554C_1_4_0	0
ANAC060 S_012554C	1	Col-0	0	4	NA	NA	26-Feb	2018	08-Mar	NA	7	123	123	0		NA	NA	33	2	2	ANAC060 S_012554C_1_4_0	1.62601626
ANAC060 S_012554C	1	Col-0	0	4	NA	NA	26-Feb	2018	08-Mar	NA	7	123	123	0		NA	NA	33	3	93	ANAC060 S_012554C_1_4_0	75.6097561
ANAC060 S_012554C	1	Col-0	0	4	NA	NA	26-Feb	2018	08-Mar	NA	7	123	123	0		NA	NA	33	4	26	ANAC060 S_012554C_1_4_0	21.13821138
ANAC060 S_012554C	1	Col-0	0	4	NA	NA	26-Feb	2018	08-Mar	NA	7	123	123	0		NA	NA	33	5	1	ANAC060 S_012554C_1_4_0	0.81300813
ANAC060 S_012554C	1	Col-0	0	4	NA	NA	26-Feb	2018	08-Mar	NA	7	123	123	0		NA	NA	33	6	1	ANAC060 S_012554C_1_4_0	0.81300813
ANAC060 S_012554C	1	Col-0	0	4	NA	NA	26-Feb	2018	08-Mar	NA	7	123	123	0		NA	NA	33	7	0	ANAC060 S_012554C_1_4_0	0
ANAC060 S_012554C	1	Col-0	0	4	NA	NA	26-Feb	2018	08-Mar	NA	7	123	123	0		NA	NA	33	8	0	ANAC060 S_012554C_1_4_0	0
ANAC060 S_012554C	1	Col-0	0	4	NA	NA	26-Feb	2018	08-Mar	NA	7	123	123	0		NA	NA	33	9	0	ANAC060 S_012554C_1_4_0	0
ANAC060 S_012554C	1	Col-0	0	4	NA	NA	26-Feb	2018	08-Mar	NA	7	123	123	0		NA	NA	33	10	0	ANAC060 S_012554C_1_4_0	0
ANAC060 S_012554C	1	Col-0	5	4	NA	NA	26-Feb	2018	08-Mar	NA	7	17	127	110		NA	NA	34	1	0	ANAC060 S_012554C_1_4_5	0
ANAC060 S_012554C	1	Col-0	5	4	NA	NA	26-Feb	2018	08-Mar	NA	7	17	127	110		NA	NA	34	2	0	ANAC060 S_012554C_1_4_5	0
ANAC060 S_012554C	1	Col-0	5	4	NA	NA	26-Feb	2018	08-Mar	NA	7	17	127	110		NA	NA	34	3	7	ANAC060 S_012554C_1_4_5	5.511811024
ANAC060 S_012554C	1	Col-0	5	4	NA	NA	26-Feb	2018	08-Mar	NA	7	17	127	110		NA	NA	34	4	6	ANAC060 S_012554C_1_4_5	4.724409449
ANAC060 S_012554C	1	Col-0	5	4	NA	NA	26-Feb	2018	08-Mar	NA	7	17	127	110		NA	NA	34	5	2	ANAC060 S_012554C_1_4_5	1.57480315
ANAC060 S_012554C	1	Col-0	5	4	NA	NA	26-Feb	2018	08-Mar	NA	7	17	127	110		NA	NA	34	6	1	ANAC060 S_012554C_1_4_5	0.787401575
ANAC060 S_012554C	1	Col-0	5	4	NA	NA	26-Feb	2018	08-Mar	NA	7	17	127	110		NA	NA	34	7	1	ANAC060 S_012554C_1_4_5	0.787401575
ANAC060 S_012554C	1	Col-0	5	4	NA	NA	26-Feb	2018	08-Mar	NA	7	17	127	110		NA	NA	34	8	0	ANAC060 S_012554C_1_4_5	0
ANAC060 S_012554C	1	Col-0	5	4	NA	NA	26-Feb	2018	08-Mar	NA	7	17	127	110		NA	NA	34	9	0	ANAC060 S_012554C_1_4_5	0
ANAC060 S_012554C	1	Col-0	5	4	NA	NA	26-Feb	2018	08-Mar	NA	7	17	127	110		NA	NA	34	10	0	ANAC060 S_012554C_1_4_5	0
ANAC060 S_012554C	1	Col-0	0	5	25	9	25-Sep	2020	14/10/2020	NA	2	177	177	0		NA	NA	57	1	0	ANAC060 S_012554C_1_5_0	0
ANAC060 S_012554C	1	Col-0	0	5	25	9	25-Sep	2020	14/10/2020	NA	2	177	177	0		NA	NA	57	2	0	ANAC060 S_012554C_1_5_0	0
ANAC060 S_012554C	1	Col-0	0	5	25	9	25-Sep	2020	14/10/2020	NA	2	177	177	0		NA	NA	57	3	168	ANAC060 S_012554C_1_5_0	94.91525424
ANAC060 S_012554C	1	Col-0	0	5	25	9	25-Sep	2020	14/10/2020	NA	2	177	177	0		NA	NA	57	4	9	ANAC060 S_012554C_1_5_0	5.084745763
ANAC060 S_012554C	1	Col-0	0	5	25	9	25-Sep	2020	14/10/2020	NA	2	177	177	0		NA	NA	57	5	0	ANAC060 S_012554C_1_5_0	0
ANAC060 S_012554C	1	Col-0	0	5	25	9	25-Sep	2020	14/10/2020	NA	2	177	177	0		NA	NA	57	6	0	ANAC060 S_012554C_1_5_0	0
ANAC060 S_012554C	1	Col-0	0	5	25	9	25-Sep	2020	14/10/2020	NA	2	177	177	0		NA	NA	57	7	0	ANAC060 S_012554C_1_5_0	0
ANAC060 S_012554C	1	Col-0	0	5	25	9	25-Sep	2020	14/10/2020	NA	2	177	177	0		NA	NA	57	8	0	ANAC060 S_012554C_1_5_0	0
ANAC060 S_012554C	1	Col-0	0	5	25	9	25-Sep	2020	14/10/2020	NA	2	177	177	0		NA	NA	57	9	0	ANAC060 S_012554C_1_5_0	0
ANAC060 S_012554C	1	Col-0	0	5	25	9	25-Sep	2020	14/10/2020	NA	2	177	177	0		NA	NA	57	10	0	ANAC060 S_012554C_1_5_0	0
ANAC060 S_012554C	1	Col-0	0	5	25	9	25-Sep	2020	14/10/2020	NA	2	177	177	0		NA	NA	57	11	0	ANAC060 S_012554C_1_5_0	0
ANAC060 S_012554C	1	Col-0	0	5	25	9	25-Sep	2020	14/10/2020	NA	2	177	177	0		NA	NA	57	12	0	ANAC060 S_012554C_1_5_0	0
ANAC060 S_012554C	1	Col-0	0	5	25	9	25-Sep	2020	14/10/2020	NA	2	177	177	0		NA	NA	57	13	0	ANAC060 S_012554C_1_5_0	0
ANAC060 S_012554C	1	Col-0	0	5	25	9	25-Sep	2020	14/10/2020	NA	2	177	177	0		NA	NA	57	14	0	ANAC060 S_012554C_1_5_0	0
ANAC060 S_012554C	1	Col-0	0	5	25	9	25-Sep	2020	14/10/2020	NA	2	177	177	0		NA	NA	57	15	0	ANAC060 S_012554C_1_5_0	0
ANAC060 S_012554C	1	Col-0	0	5	25	9	25-Sep	2020	14/10/2020	NA	2	177	177	0		NA	NA	57	16	0	ANAC060 S_012554C_1_5_0	0
ANAC060 S_012554C	1	Col-0	0	5	25	9	25-Sep	2020	14/10/2020	NA	2	177	177	0		NA	NA	57	17	0	ANAC060 S_012554C_1_5_0	0
ANAC060 S_012554C	1	Col-0	0	5	25	9	25-Sep	2020	14/10/2020	NA	2	177	177	0		NA	NA	57	18	0	ANAC060 S_012554C_1_5_0	0
ANAC060 S_012554C	1	Col-0	0	5	25	9	25-Sep	2020	14/10/2020	NA	2	177	177	0		NA	NA	57	19	0	ANAC060 S_012554C_1_5_0	0
ANAC060 S_012554C	1	Col-0	1	5	25	9	25-Sep	2020	14/10/2020	NA	2	201	203	2		NA	NA	60	1	0	ANAC060 S_012554C_1_5_1	0
ANAC060 S_012554C	1	Col-0	1	5	25	9	25-Sep	2020	14/10/2020	NA	2	201	203	2		NA	NA	60	2	38	ANAC060 S_012554C_1_5_1	18.71921182
ANAC060 S_012554C	1	Col-0	1	5	25	9	25-Sep	2020	14/10/2020	NA	2	201	203	2		NA	NA	60	3	143	ANAC060 S_012554C_1_5_1	70.44334975
ANAC060 S_012554C	1	Col-0	1	5	25	9	25-Sep	2020	14/10/2020	NA	2	201	203	2		NA	NA	60	4	17	ANAC060 S_012554C_1_5_1	8.374384236
ANAC060 S_012554C	1	Col-0	1	5	25	9	25-Sep	2020	14/10/2020	NA	2	201	203	2		NA	NA	60	5	3	ANAC060 S_012554C_1_5_1	1.477832512
ANAC060 S_012554C	1	Col-0	1	5	25	9	25-Sep	2020	14/10/2020	NA	2	201	203	2		NA	NA	60	6	0	ANAC060 S_012554C_1_5_1	0
ANAC060 S_012554C	1	Col-0	1	5	25	9	25-Sep	2020	14/10/2020	NA	2	201	203	2		NA	NA	60	7	0	ANAC060 S_012554C_1_5_1	0
ANAC060 S_012554C	1	Col-0	1	5	25	9	25-Sep	2020	14/10/2020	NA	2	201	203	2		NA	NA	60	8	0	ANAC060 S_012554C_1_5_1	0
ANAC060 S_012554C	1	Col-0	1	5	25	9	25-Sep	2020	14/10/2020	NA	2	201	203	2		NA	NA	60	9	0	ANAC060 S_012554C_1_5_1	0
ANAC060 S_012554C	1	Col-0	1	5	25	9	25-Sep	2020	14/10/2020	NA	2	201	203	2		NA	NA	60	10	0	ANAC060 S_012554C_1_5_1	0
ANAC060 S_012554C	1	Col-0	1	5	25	9	25-Sep	2020	14/10/2020	NA	2	201	203	2		NA	NA	60	11	0	ANAC060 S_012554C_1_5_1	0
ANAC060 S_012554C	1	Col-0	1	5	25	9	25-Sep	2020	14/10/2020	NA	2	201	203	2		NA	NA	60	12	0	ANAC060 S_012554C_1_5_1	0
ANAC060 S_012554C	1	Col-0	1	5	25	9	25-Sep	2020	14/10/2020	NA	2	201	203	2		NA	NA	60	13	0	ANAC060 S_012554C_1_5_1	0
ANAC060 S_012554C	1	Col-0	1	5	25	9	25-Sep	2020	14/10/2020	NA	2	201	203	2		NA	NA	60	14	0	ANAC060 S_012554C_1_5_1	0
ANAC060 S_012554C	1	Col-0	1	5	25	9	25-Sep	2020	14/10/2020	NA	2	201	203	2		NA	NA	60	15	0	ANAC060 S_012554C_1_5_1	0
ANAC060 S_012554C	1	Col-0	1	5	25	9	25-Sep	2020	14/10/2020	NA	2	201	203	2		NA	NA	60	16	0	ANAC060 S_012554C_1_5_1	0
ANAC060 S_012554C	1	Col-0	1	5	25	9	25-Sep	2020	14/10/2020	NA	2	201	203	2		NA	NA	60	17	0	ANAC060 S_012554C_1_5_1	0
ANAC060 S_012554C	1	Col-0	1	5	25	9	25-Sep	2020	14/10/2020	NA	2	201	203	2		NA	NA	60	18	0	ANAC060 S_012554C_1_5_1	0
ANAC060 S_012554C	1	Col-0	1	5	25	9	25-Sep	2020	14/10/2020	NA	2	201	203	2		NA	NA	60	19	0	ANAC060 S_012554C_1_5_1	0
ANAC060 S_012554C	1	Col-0	5	5	25	9	25-Sep	2020	14/10/2020	NA	2	79	179	100		NA	NA	63	1	0	ANAC060 S_012554C_1_5_5	0
ANAC060 S_012554C	1	Col-0	5	5	25	9	25-Sep	2020	14/10/2020	NA	2	79	179	100		NA	NA	63	2	0	ANAC060 S_012554C_1_5_5	0
ANAC060 S_012554C	1	Col-0	5	5	25	9	25-Sep	2020	14/10/2020	NA	2	79	179	100		NA	NA	63	3	13	ANAC060 S_012554C_1_5_5	7.262569832
ANAC060 S_012554C	1	Col-0	5	5	25	9	25-Sep	2020	14/10/2020	NA	2	79	179	100		NA	NA	63	4	21	ANAC060 S_012554C_1_5_5	11.73184358
ANAC060 S_012554C	1	Col-0	5	5	25	9	25-Sep	2020	14/10/2020	NA	2	79	179	100		NA	NA	63	5	16	ANAC060 S_012554C_1_5_5	8.938547486
ANAC060 S_012554C	1	Col-0	5	5	25	9	25-Sep	2020	14/10/2020	NA	2	79	179	100		NA	NA	63	6	8	ANAC060 S_012554C_1_5_5	4.469273743
ANAC060 S_012554C	1	Col-0	5	5	25	9	25-Sep	2020	14/10/2020	NA	2	79	179	100		NA	NA	63	7	10	ANAC060 S_012554C_1_5_5	5.586592179
ANAC060 S_012554C	1	Col-0	5	5	25	9	25-Sep	2020	14/10/2020	NA	2	79	179	100		NA	NA	63	8	3	ANAC060 S_012554C_1_5_5	1.675977654
ANAC060 S_012554C	1	Col-0	5	5	25	9	25-Sep	2020	14/10/2020	NA	2	79	179	100		NA	NA	63	9	3	ANAC060 S_012554C_1_5_5	1.675977654
ANAC060 S_012554C	1	Col-0	5	5	25	9	25-Sep	2020	14/10/2020	NA	2	79	179	100		NA	NA	63	10	2	ANAC060 S_012554C_1_5_5	1.117318436
ANAC060 S_012554C	1	Col-0	5	5	25	9	25-Sep	2020	14/10/2020	NA	2	79	179	100		NA	NA	63	11	0	ANAC060 S_012554C_1_5_5	0
ANAC060 S_012554C	1	Col-0	5	5	25	9	25-Sep	2020	14/10/2020	NA	2	79	179	100		NA	NA	63	12	1	ANAC060 S_012554C_1_5_5	0.558659218
ANAC060 S_012554C	1	Col-0	5	5	25	9	25-Sep	2020	14/10/2020	NA	2	79	179	100		NA	NA	63	13	0	ANAC060 S_012554C_1_5_5	0
ANAC060 S_012554C	1	Col-0	5	5	25	9	25-Sep	2020	14/10/2020	NA	2	79	179	100		NA	NA	63	14	0	ANAC060 S_012554C_1_5_5	0
ANAC060 S_012554C	1	Col-0	5	5	25	9	25-Sep	2020	14/10/2020	NA	2	79	179	100		NA	NA	63	15	0	ANAC060 S_012554C_1_5_5	0
ANAC060 S_012554C	1	Col-0	5	5	25	9	25-Sep	2020	14/10/2020	NA	2	79	179	100		NA	NA	63	16	1	ANAC060 S_012554C_1_5_5	0.558659218
ANAC060 S_012554C	1	Col-0	5	5	25	9	25-Sep	2020	14/10/2020	NA	2	79	179	100		NA	NA	63	17	1	ANAC060 S_012554C_1_5_5	0.558659218
ANAC060 S_012554C	1	Col-0	5	5	25	9	25-Sep	2020	14/10/2020	NA	2	79	179	100		NA	NA	63	18	0	ANAC060 S_012554C_1_5_5	0
ANAC060 S_012554C	1	Col-0	5	5	25	9	25-Sep	2020	14/10/2020	NA	2	79	179	100		NA	NA	63	19	0	ANAC060 S_012554C_1_5_5	0
ANAC060 S_012554C	1	Col-0	10	5	25	9	25-Sep	2020	14/10/2020	NA	2	4	184	180		NA	NA	66	1	0	ANAC060 S_012554C_1_5_10	0
ANAC060 S_012554C	1	Col-0	10	5	25	9	25-Sep	2020	14/10/2020	NA	2	4	184	180		NA	NA	66	2	0	ANAC060 S_012554C_1_5_10	0
ANAC060 S_012554C	1	Col-0	10	5	25	9	25-Sep	2020	14/10/2020	NA	2	4	184	180		NA	NA	66	3	1	ANAC060 S_012554C_1_5_10	0.543478261
ANAC060 S_012554C	1	Col-0	10	5	25	9	25-Sep	2020	14/10/2020	NA	2	4	184	180		NA	NA	66	4	0	ANAC060 S_012554C_1_5_10	0
ANAC060 S_012554C	1	Col-0	10	5	25	9	25-Sep	2020	14/10/2020	NA	2	4	184	180		NA	NA	66	5	1	ANAC060 S_012554C_1_5_10	0.543478261
ANAC060 S_012554C	1	Col-0	10	5	25	9	25-Sep	2020	14/10/2020	NA	2	4	184	180		NA	NA	66	6	1	ANAC060 S_012554C_1_5_10	0.543478261
ANAC060 S_012554C	1	Col-0	10	5	25	9	25-Sep	2020	14/10/2020	NA	2	4	184	180		NA	NA	66	7	1	ANAC060 S_012554C_1_5_10	0.543478261
ANAC060 S_012554C	1	Col-0	10	5	25	9	25-Sep	2020	14/10/2020	NA	2	4	184	180		NA	NA	66	8	0	ANAC060 S_012554C_1_5_10	0
ANAC060 S_012554C	1	Col-0	10	5	25	9	25-Sep	2020	14/10/2020	NA	2	4	184	180		NA	NA	66	9	0	ANAC060 S_012554C_1_5_10	0
ANAC060 S_012554C	1	Col-0	10	5	25	9	25-Sep	2020	14/10/2020	NA	2	4	184	180		NA	NA	66	10	0	ANAC060 S_012554C_1_5_10	0
ANAC060 S_012554C	1	Col-0	10	5	25	9	25-Sep	2020	14/10/2020	NA	2	4	184	180		NA	NA	66	11	0	ANAC060 S_012554C_1_5_10	0
ANAC060 S_012554C	1	Col-0	10	5	25	9	25-Sep	2020	14/10/2020	NA	2	4	184	180		NA	NA	66	12	0	ANAC060 S_012554C_1_5_10	0
ANAC060 S_012554C	1	Col-0	10	5	25	9	25-Sep	2020	14/10/2020	NA	2	4	184	180		NA	NA	66	13	0	ANAC060 S_012554C_1_5_10	0
ANAC060 S_012554C	1	Col-0	10	5	25	9	25-Sep	2020	14/10/2020	NA	2	4	184	180		NA	NA	66	14	0	ANAC060 S_012554C_1_5_10	0
ANAC060 S_012554C	1	Col-0	10	5	25	9	25-Sep	2020	14/10/2020	NA	2	4	184	180		NA	NA	66	15	0	ANAC060 S_012554C_1_5_10	0
ANAC060 S_012554C	1	Col-0	10	5	25	9	25-Sep	2020	14/10/2020	NA	2	4	184	180		NA	NA	66	16	0	ANAC060 S_012554C_1_5_10	0
ANAC060 S_012554C	1	Col-0	10	5	25	9	25-Sep	2020	14/10/2020	NA	2	4	184	180		NA	NA	66	17	0	ANAC060 S_012554C_1_5_10	0
ANAC060 S_012554C	1	Col-0	10	5	25	9	25-Sep	2020	14/10/2020	NA	2	4	184	180		NA	NA	66	18	0	ANAC060 S_012554C_1_5_10	0
ANAC060 S_012554C	1	Col-0	10	5	25	9	25-Sep	2020	14/10/2020	NA	2	4	184	180		NA	NA	66	19	0	ANAC060 S_012554C_1_5_10	0
ANAC060 S_012554C	1	Col-0	0	8	5	11	05-Nov	2020	23/11/2020	NA	30	201	201	0		NA	NA	157	1	0	ANAC060 S_012554C_1_8_0	0
ANAC060 S_012554C	1	Col-0	0	8	5	11	05-Nov	2020	23/11/2020	NA	30	201	201	0		NA	NA	157	2	47	ANAC060 S_012554C_1_8_0	23.38308458
ANAC060 S_012554C	1	Col-0	0	8	5	11	05-Nov	2020	23/11/2020	NA	30	201	201	0		NA	NA	157	3	150	ANAC060 S_012554C_1_8_0	74.62686567
ANAC060 S_012554C	1	Col-0	0	8	5	11	05-Nov	2020	23/11/2020	NA	30	201	201	0		NA	NA	157	4	2	ANAC060 S_012554C_1_8_0	0.995024876
ANAC060 S_012554C	1	Col-0	0	8	5	11	05-Nov	2020	23/11/2020	NA	30	201	201	0		NA	NA	157	5	0	ANAC060 S_012554C_1_8_0	0
ANAC060 S_012554C	1	Col-0	0	8	5	11	05-Nov	2020	23/11/2020	NA	30	201	201	0		NA	NA	157	6	2	ANAC060 S_012554C_1_8_0	0.995024876
ANAC060 S_012554C	1	Col-0	0	8	5	11	05-Nov	2020	23/11/2020	NA	30	201	201	0		NA	NA	157	7	0	ANAC060 S_012554C_1_8_0	0
ANAC060 S_012554C	1	Col-0	0	8	5	11	05-Nov	2020	23/11/2020	NA	30	201	201	0		NA	NA	157	8	0	ANAC060 S_012554C_1_8_0	0
ANAC060 S_012554C	1	Col-0	0	8	5	11	05-Nov	2020	23/11/2020	NA	30	201	201	0		NA	NA	157	9	0	ANAC060 S_012554C_1_8_0	0
ANAC060 S_012554C	1	Col-0	0	8	5	11	05-Nov	2020	23/11/2020	NA	30	201	201	0		NA	NA	157	10	0	ANAC060 S_012554C_1_8_0	0
ANAC060 S_012554C	1	Col-0	0	8	5	11	05-Nov	2020	23/11/2020	NA	30	201	201	0		NA	NA	157	11	0	ANAC060 S_012554C_1_8_0	0
ANAC060 S_012554C	1	Col-0	0	8	5	11	05-Nov	2020	23/11/2020	NA	30	201	201	0		NA	NA	157	12	0	ANAC060 S_012554C_1_8_0	0
ANAC060 S_012554C	1	Col-0	0	8	5	11	05-Nov	2020	23/11/2020	NA	30	201	201	0		NA	NA	157	13	0	ANAC060 S_012554C_1_8_0	0
ANAC060 S_012554C	1	Col-0	0	8	5	11	05-Nov	2020	23/11/2020	NA	30	201	201	0		NA	NA	157	14	0	ANAC060 S_012554C_1_8_0	0
ANAC060 S_012554C	1	Col-0	0	8	5	11	05-Nov	2020	23/11/2020	NA	30	201	201	0		NA	NA	157	15	0	ANAC060 S_012554C_1_8_0	0
ANAC060 S_012554C	1	Col-0	0	8	5	11	05-Nov	2020	23/11/2020	NA	30	201	201	0		NA	NA	157	16	0	ANAC060 S_012554C_1_8_0	0
ANAC060 S_012554C	1	Col-0	0	8	5	11	05-Nov	2020	23/11/2020	NA	30	201	201	0		NA	NA	157	17	0	ANAC060 S_012554C_1_8_0	0
ANAC060 S_012554C	1	Col-0	0	8	5	11	05-Nov	2020	23/11/2020	NA	30	201	201	0		NA	NA	157	18	0	ANAC060 S_012554C_1_8_0	0
ANAC060 S_012554C	1	Col-0	1	8	5	11	05-Nov	2020	23/11/2020	NA	30	224	224	0		NA	NA	160	1	0	ANAC060 S_012554C_1_8_1	0
ANAC060 S_012554C	1	Col-0	1	8	5	11	05-Nov	2020	23/11/2020	NA	30	224	224	0		NA	NA	160	2	0	ANAC060 S_012554C_1_8_1	0
ANAC060 S_012554C	1	Col-0	1	8	5	11	05-Nov	2020	23/11/2020	NA	30	224	224	0		NA	NA	160	3	89	ANAC060 S_012554C_1_8_1	39.73214286
ANAC060 S_012554C	1	Col-0	1	8	5	11	05-Nov	2020	23/11/2020	NA	30	224	224	0		NA	NA	160	4	114	ANAC060 S_012554C_1_8_1	50.89285714
ANAC060 S_012554C	1	Col-0	1	8	5	11	05-Nov	2020	23/11/2020	NA	30	224	224	0		NA	NA	160	5	13	ANAC060 S_012554C_1_8_1	5.803571429
ANAC060 S_012554C	1	Col-0	1	8	5	11	05-Nov	2020	23/11/2020	NA	30	224	224	0		NA	NA	160	6	5	ANAC060 S_012554C_1_8_1	2.232142857
ANAC060 S_012554C	1	Col-0	1	8	5	11	05-Nov	2020	23/11/2020	NA	30	224	224	0		NA	NA	160	7	1	ANAC060 S_012554C_1_8_1	0.446428571
ANAC060 S_012554C	1	Col-0	1	8	5	11	05-Nov	2020	23/11/2020	NA	30	224	224	0		NA	NA	160	8	1	ANAC060 S_012554C_1_8_1	0.446428571
ANAC060 S_012554C	1	Col-0	1	8	5	11	05-Nov	2020	23/11/2020	NA	30	224	224	0		NA	NA	160	9	0	ANAC060 S_012554C_1_8_1	0
ANAC060 S_012554C	1	Col-0	1	8	5	11	05-Nov	2020	23/11/2020	NA	30	224	224	0		NA	NA	160	10	0	ANAC060 S_012554C_1_8_1	0
ANAC060 S_012554C	1	Col-0	1	8	5	11	05-Nov	2020	23/11/2020	NA	30	224	224	0		NA	NA	160	11	0	ANAC060 S_012554C_1_8_1	0
ANAC060 S_012554C	1	Col-0	1	8	5	11	05-Nov	2020	23/11/2020	NA	30	224	224	0		NA	NA	160	12	0	ANAC060 S_012554C_1_8_1	0
ANAC060 S_012554C	1	Col-0	1	8	5	11	05-Nov	2020	23/11/2020	NA	30	224	224	0		NA	NA	160	13	0	ANAC060 S_012554C_1_8_1	0
ANAC060 S_012554C	1	Col-0	1	8	5	11	05-Nov	2020	23/11/2020	NA	30	224	224	0		NA	NA	160	14	0	ANAC060 S_012554C_1_8_1	0
ANAC060 S_012554C	1	Col-0	1	8	5	11	05-Nov	2020	23/11/2020	NA	30	224	224	0		NA	NA	160	15	0	ANAC060 S_012554C_1_8_1	0
ANAC060 S_012554C	1	Col-0	1	8	5	11	05-Nov	2020	23/11/2020	NA	30	224	224	0		NA	NA	160	16	0	ANAC060 S_012554C_1_8_1	0
ANAC060 S_012554C	1	Col-0	1	8	5	11	05-Nov	2020	23/11/2020	NA	30	224	224	0		NA	NA	160	17	1	ANAC060 S_012554C_1_8_1	0.446428571
ANAC060 S_012554C	1	Col-0	1	8	5	11	05-Nov	2020	23/11/2020	NA	30	224	224	0		NA	NA	160	18	0	ANAC060 S_012554C_1_8_1	0
ANAC060 S_012554C	1	Col-0	5	8	5	11	05-Nov	2020	23/11/2020	NA	30	10	190	180		NA	NA	163	1	0	ANAC060 S_012554C_1_8_5	0
ANAC060 S_012554C	1	Col-0	5	8	5	11	05-Nov	2020	23/11/2020	NA	30	10	190	180		NA	NA	163	2	0	ANAC060 S_012554C_1_8_5	0
ANAC060 S_012554C	1	Col-0	5	8	5	11	05-Nov	2020	23/11/2020	NA	30	10	190	180		NA	NA	163	3	4	ANAC060 S_012554C_1_8_5	2.105263158
ANAC060 S_012554C	1	Col-0	5	8	5	11	05-Nov	2020	23/11/2020	NA	30	10	190	180		NA	NA	163	4	1	ANAC060 S_012554C_1_8_5	0.526315789
ANAC060 S_012554C	1	Col-0	5	8	5	11	05-Nov	2020	23/11/2020	NA	30	10	190	180		NA	NA	163	5	1	ANAC060 S_012554C_1_8_5	0.526315789
ANAC060 S_012554C	1	Col-0	5	8	5	11	05-Nov	2020	23/11/2020	NA	30	10	190	180		NA	NA	163	6	0	ANAC060 S_012554C_1_8_5	0
ANAC060 S_012554C	1	Col-0	5	8	5	11	05-Nov	2020	23/11/2020	NA	30	10	190	180		NA	NA	163	7	0	ANAC060 S_012554C_1_8_5	0
ANAC060 S_012554C	1	Col-0	5	8	5	11	05-Nov	2020	23/11/2020	NA	30	10	190	180		NA	NA	163	8	1	ANAC060 S_012554C_1_8_5	0.526315789
ANAC060 S_012554C	1	Col-0	5	8	5	11	05-Nov	2020	23/11/2020	NA	30	10	190	180		NA	NA	163	9	0	ANAC060 S_012554C_1_8_5	0
ANAC060 S_012554C	1	Col-0	5	8	5	11	05-Nov	2020	23/11/2020	NA	30	10	190	180		NA	NA	163	10	0	ANAC060 S_012554C_1_8_5	0
ANAC060 S_012554C	1	Col-0	5	8	5	11	05-Nov	2020	23/11/2020	NA	30	10	190	180		NA	NA	163	11	1	ANAC060 S_012554C_1_8_5	0.526315789
ANAC060 S_012554C	1	Col-0	5	8	5	11	05-Nov	2020	23/11/2020	NA	30	10	190	180		NA	NA	163	12	0	ANAC060 S_012554C_1_8_5	0
ANAC060 S_012554C	1	Col-0	5	8	5	11	05-Nov	2020	23/11/2020	NA	30	10	190	180		NA	NA	163	13	1	ANAC060 S_012554C_1_8_5	0.526315789
ANAC060 S_012554C	1	Col-0	5	8	5	11	05-Nov	2020	23/11/2020	NA	30	10	190	180		NA	NA	163	14	0	ANAC060 S_012554C_1_8_5	0
ANAC060 S_012554C	1	Col-0	5	8	5	11	05-Nov	2020	23/11/2020	NA	30	10	190	180		NA	NA	163	15	0	ANAC060 S_012554C_1_8_5	0
ANAC060 S_012554C	1	Col-0	5	8	5	11	05-Nov	2020	23/11/2020	NA	30	10	190	180		NA	NA	163	16	0	ANAC060 S_012554C_1_8_5	0
ANAC060 S_012554C	1	Col-0	5	8	5	11	05-Nov	2020	23/11/2020	NA	30	10	190	180		NA	NA	163	17	0	ANAC060 S_012554C_1_8_5	0
ANAC060 S_012554C	1	Col-0	5	8	5	11	05-Nov	2020	23/11/2020	NA	30	10	190	180		NA	NA	163	18	1	ANAC060 S_012554C_1_8_5	0.526315789
ANAC060 S_012554C	1	Col-0	10	8	5	11	05-Nov	2020	23/11/2020	NA	30	1	111	110		NA	NA	166	1	0	ANAC060 S_012554C_1_8_10	0
ANAC060 S_012554C	1	Col-0	10	8	5	11	05-Nov	2020	23/11/2020	NA	30	1	111	110		NA	NA	166	2	0	ANAC060 S_012554C_1_8_10	0
ANAC060 S_012554C	1	Col-0	10	8	5	11	05-Nov	2020	23/11/2020	NA	30	1	111	110		NA	NA	166	3	1	ANAC060 S_012554C_1_8_10	0.900900901
ANAC060 S_012554C	1	Col-0	10	8	5	11	05-Nov	2020	23/11/2020	NA	30	1	111	110		NA	NA	166	4	0	ANAC060 S_012554C_1_8_10	0
ANAC060 S_012554C	1	Col-0	10	8	5	11	05-Nov	2020	23/11/2020	NA	30	1	111	110		NA	NA	166	5	0	ANAC060 S_012554C_1_8_10	0
ANAC060 S_012554C	1	Col-0	10	8	5	11	05-Nov	2020	23/11/2020	NA	30	1	111	110		NA	NA	166	6	0	ANAC060 S_012554C_1_8_10	0
ANAC060 S_012554C	1	Col-0	10	8	5	11	05-Nov	2020	23/11/2020	NA	30	1	111	110		NA	NA	166	7	0	ANAC060 S_012554C_1_8_10	0
ANAC060 S_012554C	1	Col-0	10	8	5	11	05-Nov	2020	23/11/2020	NA	30	1	111	110		NA	NA	166	8	0	ANAC060 S_012554C_1_8_10	0
ANAC060 S_012554C	1	Col-0	10	8	5	11	05-Nov	2020	23/11/2020	NA	30	1	111	110		NA	NA	166	9	0	ANAC060 S_012554C_1_8_10	0
ANAC060 S_012554C	1	Col-0	10	8	5	11	05-Nov	2020	23/11/2020	NA	30	1	111	110		NA	NA	166	10	0	ANAC060 S_012554C_1_8_10	0
ANAC060 S_012554C	1	Col-0	10	8	5	11	05-Nov	2020	23/11/2020	NA	30	1	111	110		NA	NA	166	11	0	ANAC060 S_012554C_1_8_10	0
ANAC060 S_012554C	1	Col-0	10	8	5	11	05-Nov	2020	23/11/2020	NA	30	1	111	110		NA	NA	166	12	0	ANAC060 S_012554C_1_8_10	0
ANAC060 S_012554C	1	Col-0	10	8	5	11	05-Nov	2020	23/11/2020	NA	30	1	111	110		NA	NA	166	13	0	ANAC060 S_012554C_1_8_10	0
ANAC060 S_012554C	1	Col-0	10	8	5	11	05-Nov	2020	23/11/2020	NA	30	1	111	110		NA	NA	166	14	0	ANAC060 S_012554C_1_8_10	0
ANAC060 S_012554C	1	Col-0	10	8	5	11	05-Nov	2020	23/11/2020	NA	30	1	111	110		NA	NA	166	15	0	ANAC060 S_012554C_1_8_10	0
ANAC060 S_012554C	1	Col-0	10	8	5	11	05-Nov	2020	23/11/2020	NA	30	1	111	110		NA	NA	166	16	0	ANAC060 S_012554C_1_8_10	0
ANAC060 S_012554C	1	Col-0	10	8	5	11	05-Nov	2020	23/11/2020	NA	30	1	111	110		NA	NA	166	17	0	ANAC060 S_012554C_1_8_10	0
ANAC060 S_012554C	1	Col-0	10	8	5	11	05-Nov	2020	23/11/2020	NA	30	1	111	110		NA	NA	166	18	0	ANAC060 S_012554C_1_8_10	0
ANAC060 S_012554C	2	Col-0	0	2	NA	NA	05-Dec	2017	19-Dec	NA	1	94	106	12		NA	NA	13	1	0	ANAC060 S_012554C_2_2_0	0
ANAC060 S_012554C	2	Col-0	0	2	NA	NA	05-Dec	2017	19-Dec	NA	1	94	106	12		NA	NA	13	2	0	ANAC060 S_012554C_2_2_0	0
ANAC060 S_012554C	2	Col-0	0	2	NA	NA	05-Dec	2017	19-Dec	NA	1	94	106	12		NA	NA	13	3	17	ANAC060 S_012554C_2_2_0	16.03773585
ANAC060 S_012554C	2	Col-0	0	2	NA	NA	05-Dec	2017	19-Dec	NA	1	94	106	12		NA	NA	13	4	69	ANAC060 S_012554C_2_2_0	65.09433962
ANAC060 S_012554C	2	Col-0	0	2	NA	NA	05-Dec	2017	19-Dec	NA	1	94	106	12		NA	NA	13	5	2	ANAC060 S_012554C_2_2_0	1.886792453
ANAC060 S_012554C	2	Col-0	0	2	NA	NA	05-Dec	2017	19-Dec	NA	1	94	106	12		NA	NA	13	6	4	ANAC060 S_012554C_2_2_0	3.773584906
ANAC060 S_012554C	2	Col-0	0	2	NA	NA	05-Dec	2017	19-Dec	NA	1	94	106	12		NA	NA	13	7	2	ANAC060 S_012554C_2_2_0	1.886792453
ANAC060 S_012554C	2	Col-0	0	2	NA	NA	05-Dec	2017	19-Dec	NA	1	94	106	12		NA	NA	13	8	0	ANAC060 S_012554C_2_2_0	0
ANAC060 S_012554C	2	Col-0	0	2	NA	NA	05-Dec	2017	19-Dec	NA	1	94	106	12		NA	NA	13	9	0	ANAC060 S_012554C_2_2_0	0
ANAC060 S_012554C	2	Col-0	0	2	NA	NA	05-Dec	2017	19-Dec	NA	1	94	106	12		NA	NA	13	10	0	ANAC060 S_012554C_2_2_0	0
ANAC060 S_012554C	2	Col-0	0	2	NA	NA	05-Dec	2017	19-Dec	NA	1	94	106	12		NA	NA	13	11	0	ANAC060 S_012554C_2_2_0	0
ANAC060 S_012554C	2	Col-0	0	2	NA	NA	05-Dec	2017	19-Dec	NA	1	94	106	12		NA	NA	13	12	0	ANAC060 S_012554C_2_2_0	0
ANAC060 S_012554C	2	Col-0	0	2	NA	NA	05-Dec	2017	19-Dec	NA	1	94	106	12		NA	NA	13	13	0	ANAC060 S_012554C_2_2_0	0
ANAC060 S_012554C	2	Col-0	0	2	NA	NA	05-Dec	2017	19-Dec	NA	1	94	106	12		NA	NA	13	14	0	ANAC060 S_012554C_2_2_0	0
ANAC060 S_012554C	2	Col-0	0	2	NA	NA	05-Dec	2017	19-Dec	NA	1	94	106	12		NA	NA	13	15	0	ANAC060 S_012554C_2_2_0	0
ANAC060 S_012554C	2	Col-0	0	2	NA	NA	05-Dec	2017	19-Dec	NA	1	94	106	12		NA	NA	13	16	0	ANAC060 S_012554C_2_2_0	0
ANAC060 S_012554C	2	Col-0	0	2	NA	NA	05-Dec	2017	19-Dec	NA	1	94	106	12		NA	NA	13	17	0	ANAC060 S_012554C_2_2_0	0
ANAC060 S_012554C	2	Col-0	0	2	NA	NA	05-Dec	2017	19-Dec	NA	1	94	106	12		NA	NA	13	18	0	ANAC060 S_012554C_2_2_0	0
ANAC060 S_012554C	2	Col-0	5	2	NA	NA	05-Dec	2017	19-Dec	NA	1	78	125	47		NA	NA	14	1	0	ANAC060 S_012554C_2_2_5	0
ANAC060 S_012554C	2	Col-0	5	2	NA	NA	05-Dec	2017	19-Dec	NA	1	78	125	47		NA	NA	14	2	0	ANAC060 S_012554C_2_2_5	0
ANAC060 S_012554C	2	Col-0	5	2	NA	NA	05-Dec	2017	19-Dec	NA	1	78	125	47		NA	NA	14	3	0	ANAC060 S_012554C_2_2_5	0
ANAC060 S_012554C	2	Col-0	5	2	NA	NA	05-Dec	2017	19-Dec	NA	1	78	125	47		NA	NA	14	4	0	ANAC060 S_012554C_2_2_5	0
ANAC060 S_012554C	2	Col-0	5	2	NA	NA	05-Dec	2017	19-Dec	NA	1	78	125	47		NA	NA	14	5	0	ANAC060 S_012554C_2_2_5	0
ANAC060 S_012554C	2	Col-0	5	2	NA	NA	05-Dec	2017	19-Dec	NA	1	78	125	47		NA	NA	14	6	0	ANAC060 S_012554C_2_2_5	0
ANAC060 S_012554C	2	Col-0	5	2	NA	NA	05-Dec	2017	19-Dec	NA	1	78	125	47		NA	NA	14	7	59	ANAC060 S_012554C_2_2_5	47.2
ANAC060 S_012554C	2	Col-0	5	2	NA	NA	05-Dec	2017	19-Dec	NA	1	78	125	47		NA	NA	14	8	13	ANAC060 S_012554C_2_2_5	10.4
ANAC060 S_012554C	2	Col-0	5	2	NA	NA	05-Dec	2017	19-Dec	NA	1	78	125	47		NA	NA	14	9	1	ANAC060 S_012554C_2_2_5	0.8
ANAC060 S_012554C	2	Col-0	5	2	NA	NA	05-Dec	2017	19-Dec	NA	1	78	125	47		NA	NA	14	10	2	ANAC060 S_012554C_2_2_5	1.6
ANAC060 S_012554C	2	Col-0	5	2	NA	NA	05-Dec	2017	19-Dec	NA	1	78	125	47		NA	NA	14	11	1	ANAC060 S_012554C_2_2_5	0.8
ANAC060 S_012554C	2	Col-0	5	2	NA	NA	05-Dec	2017	19-Dec	NA	1	78	125	47		NA	NA	14	12	0	ANAC060 S_012554C_2_2_5	0
ANAC060 S_012554C	2	Col-0	5	2	NA	NA	05-Dec	2017	19-Dec	NA	1	78	125	47		NA	NA	14	13	0	ANAC060 S_012554C_2_2_5	0
ANAC060 S_012554C	2	Col-0	5	2	NA	NA	05-Dec	2017	19-Dec	NA	1	78	125	47		NA	NA	14	14	1	ANAC060 S_012554C_2_2_5	0.8
ANAC060 S_012554C	2	Col-0	5	2	NA	NA	05-Dec	2017	19-Dec	NA	1	78	125	47		NA	NA	14	15	1	ANAC060 S_012554C_2_2_5	0.8
ANAC060 S_012554C	2	Col-0	5	2	NA	NA	05-Dec	2017	19-Dec	NA	1	78	125	47		NA	NA	14	16	0	ANAC060 S_012554C_2_2_5	0
ANAC060 S_012554C	2	Col-0	5	2	NA	NA	05-Dec	2017	19-Dec	NA	1	78	125	47		NA	NA	14	17	0	ANAC060 S_012554C_2_2_5	0
ANAC060 S_012554C	2	Col-0	5	2	NA	NA	05-Dec	2017	19-Dec	NA	1	78	125	47		NA	NA	14	18	0	ANAC060 S_012554C_2_2_5	0
ANAC060 S_012554C	2	Col-0	0	3	NA	NA	30-Jan	2018	28-Feb	NA	1	10	144	134		NA	NA	32	1	0	ANAC060 S_012554C_2_3_0	0
ANAC060 S_012554C	2	Col-0	0	3	NA	NA	30-Jan	2018	28-Feb	NA	1	10	144	134		NA	NA	32	2	0	ANAC060 S_012554C_2_3_0	0
ANAC060 S_012554C	2	Col-0	0	3	NA	NA	30-Jan	2018	28-Feb	NA	1	10	144	134		NA	NA	32	3	0	ANAC060 S_012554C_2_3_0	0
ANAC060 S_012554C	2	Col-0	0	3	NA	NA	30-Jan	2018	28-Feb	NA	1	10	144	134		NA	NA	32	4	0	ANAC060 S_012554C_2_3_0	0
ANAC060 S_012554C	2	Col-0	0	3	NA	NA	30-Jan	2018	28-Feb	NA	1	10	144	134		NA	NA	32	5	2	ANAC060 S_012554C_2_3_0	1.388888889
ANAC060 S_012554C	2	Col-0	0	3	NA	NA	30-Jan	2018	28-Feb	NA	1	10	144	134		NA	NA	32	6	3	ANAC060 S_012554C_2_3_0	2.083333333
ANAC060 S_012554C	2	Col-0	0	3	NA	NA	30-Jan	2018	28-Feb	NA	1	10	144	134		NA	NA	32	7	0	ANAC060 S_012554C_2_3_0	0
ANAC060 S_012554C	2	Col-0	0	3	NA	NA	30-Jan	2018	28-Feb	NA	1	10	144	134		NA	NA	32	8	2	ANAC060 S_012554C_2_3_0	1.388888889
ANAC060 S_012554C	2	Col-0	0	3	NA	NA	30-Jan	2018	28-Feb	NA	1	10	144	134		NA	NA	32	9	0	ANAC060 S_012554C_2_3_0	0
ANAC060 S_012554C	2	Col-0	0	3	NA	NA	30-Jan	2018	28-Feb	NA	1	10	144	134		NA	NA	32	10	3	ANAC060 S_012554C_2_3_0	2.083333333
ANAC060 S_012554C	2	Col-0	0	4	NA	NA	26-Feb	2018	08-Mar	NA	7	127	134	7		NA	NA	35	1	0	ANAC060 S_012554C_2_4_0	0
ANAC060 S_012554C	2	Col-0	0	4	NA	NA	26-Feb	2018	08-Mar	NA	7	127	134	7		NA	NA	35	2	1	ANAC060 S_012554C_2_4_0	0.746268657
ANAC060 S_012554C	2	Col-0	0	4	NA	NA	26-Feb	2018	08-Mar	NA	7	127	134	7		NA	NA	35	3	84	ANAC060 S_012554C_2_4_0	62.68656716
ANAC060 S_012554C	2	Col-0	0	4	NA	NA	26-Feb	2018	08-Mar	NA	7	127	134	7		NA	NA	35	4	32	ANAC060 S_012554C_2_4_0	23.88059701
ANAC060 S_012554C	2	Col-0	0	4	NA	NA	26-Feb	2018	08-Mar	NA	7	127	134	7		NA	NA	35	5	9	ANAC060 S_012554C_2_4_0	6.71641791
ANAC060 S_012554C	2	Col-0	0	4	NA	NA	26-Feb	2018	08-Mar	NA	7	127	134	7		NA	NA	35	6	1	ANAC060 S_012554C_2_4_0	0.746268657
ANAC060 S_012554C	2	Col-0	0	4	NA	NA	26-Feb	2018	08-Mar	NA	7	127	134	7		NA	NA	35	7	0	ANAC060 S_012554C_2_4_0	0
ANAC060 S_012554C	2	Col-0	0	4	NA	NA	26-Feb	2018	08-Mar	NA	7	127	134	7		NA	NA	35	8	0	ANAC060 S_012554C_2_4_0	0
ANAC060 S_012554C	2	Col-0	0	4	NA	NA	26-Feb	2018	08-Mar	NA	7	127	134	7		NA	NA	35	9	0	ANAC060 S_012554C_2_4_0	0
ANAC060 S_012554C	2	Col-0	0	4	NA	NA	26-Feb	2018	08-Mar	NA	7	127	134	7		NA	NA	35	10	0	ANAC060 S_012554C_2_4_0	0
ANAC060 S_012554C	2	Col-0	5	4	NA	NA	26-Feb	2018	08-Mar	NA	7	47	134	87	only 2 germinated outside scoring period. 85 were completely ungreminated	NA	NA	36	1	0	ANAC060 S_012554C_2_4_5	0
ANAC060 S_012554C	2	Col-0	5	4	NA	NA	26-Feb	2018	08-Mar	NA	7	47	134	87	only 2 germinated outside scoring period. 85 were completely ungreminated	NA	NA	36	2	0	ANAC060 S_012554C_2_4_5	0
ANAC060 S_012554C	2	Col-0	5	4	NA	NA	26-Feb	2018	08-Mar	NA	7	47	134	87	only 2 germinated outside scoring period. 85 were completely ungreminated	NA	NA	36	3	17	ANAC060 S_012554C_2_4_5	12.68656716
ANAC060 S_012554C	2	Col-0	5	4	NA	NA	26-Feb	2018	08-Mar	NA	7	47	134	87	only 2 germinated outside scoring period. 85 were completely ungreminated	NA	NA	36	4	13	ANAC060 S_012554C_2_4_5	9.701492537
ANAC060 S_012554C	2	Col-0	5	4	NA	NA	26-Feb	2018	08-Mar	NA	7	47	134	87	only 2 germinated outside scoring period. 85 were completely ungreminated	NA	NA	36	5	11	ANAC060 S_012554C_2_4_5	8.208955224
ANAC060 S_012554C	2	Col-0	5	4	NA	NA	26-Feb	2018	08-Mar	NA	7	47	134	87	only 2 germinated outside scoring period. 85 were completely ungreminated	NA	NA	36	6	5	ANAC060 S_012554C_2_4_5	3.731343284
ANAC060 S_012554C	2	Col-0	5	4	NA	NA	26-Feb	2018	08-Mar	NA	7	47	134	87	only 2 germinated outside scoring period. 85 were completely ungreminated	NA	NA	36	7	0	ANAC060 S_012554C_2_4_5	0
ANAC060 S_012554C	2	Col-0	5	4	NA	NA	26-Feb	2018	08-Mar	NA	7	47	134	87	only 2 germinated outside scoring period. 85 were completely ungreminated	NA	NA	36	8	1	ANAC060 S_012554C_2_4_5	0.746268657
ANAC060 S_012554C	2	Col-0	5	4	NA	NA	26-Feb	2018	08-Mar	NA	7	47	134	87	only 2 germinated outside scoring period. 85 were completely ungreminated	NA	NA	36	9	0	ANAC060 S_012554C_2_4_5	0
ANAC060 S_012554C	2	Col-0	5	4	NA	NA	26-Feb	2018	08-Mar	NA	7	47	134	87	only 2 germinated outside scoring period. 85 were completely ungreminated	NA	NA	36	10	0	ANAC060 S_012554C_2_4_5	0
ANAC060 S_012554C	2	Col-0	0	5	25	9	25-Sep	2020	14/10/2020	NA	2	177	177	0		NA	NA	58	1	0	ANAC060 S_012554C_2_5_0	0
ANAC060 S_012554C	2	Col-0	0	5	25	9	25-Sep	2020	14/10/2020	NA	2	177	177	0		NA	NA	58	2	2	ANAC060 S_012554C_2_5_0	1.129943503
ANAC060 S_012554C	2	Col-0	0	5	25	9	25-Sep	2020	14/10/2020	NA	2	177	177	0		NA	NA	58	3	143	ANAC060 S_012554C_2_5_0	80.79096045
ANAC060 S_012554C	2	Col-0	0	5	25	9	25-Sep	2020	14/10/2020	NA	2	177	177	0		NA	NA	58	4	32	ANAC060 S_012554C_2_5_0	18.07909605
ANAC060 S_012554C	2	Col-0	0	5	25	9	25-Sep	2020	14/10/2020	NA	2	177	177	0		NA	NA	58	5	0	ANAC060 S_012554C_2_5_0	0
ANAC060 S_012554C	2	Col-0	0	5	25	9	25-Sep	2020	14/10/2020	NA	2	177	177	0		NA	NA	58	6	0	ANAC060 S_012554C_2_5_0	0
ANAC060 S_012554C	2	Col-0	0	5	25	9	25-Sep	2020	14/10/2020	NA	2	177	177	0		NA	NA	58	7	0	ANAC060 S_012554C_2_5_0	0
ANAC060 S_012554C	2	Col-0	0	5	25	9	25-Sep	2020	14/10/2020	NA	2	177	177	0		NA	NA	58	8	0	ANAC060 S_012554C_2_5_0	0
ANAC060 S_012554C	2	Col-0	0	5	25	9	25-Sep	2020	14/10/2020	NA	2	177	177	0		NA	NA	58	9	0	ANAC060 S_012554C_2_5_0	0
ANAC060 S_012554C	2	Col-0	0	5	25	9	25-Sep	2020	14/10/2020	NA	2	177	177	0		NA	NA	58	10	0	ANAC060 S_012554C_2_5_0	0
ANAC060 S_012554C	2	Col-0	0	5	25	9	25-Sep	2020	14/10/2020	NA	2	177	177	0		NA	NA	58	11	0	ANAC060 S_012554C_2_5_0	0
ANAC060 S_012554C	2	Col-0	0	5	25	9	25-Sep	2020	14/10/2020	NA	2	177	177	0		NA	NA	58	12	0	ANAC060 S_012554C_2_5_0	0
ANAC060 S_012554C	2	Col-0	0	5	25	9	25-Sep	2020	14/10/2020	NA	2	177	177	0		NA	NA	58	13	0	ANAC060 S_012554C_2_5_0	0
ANAC060 S_012554C	2	Col-0	0	5	25	9	25-Sep	2020	14/10/2020	NA	2	177	177	0		NA	NA	58	14	0	ANAC060 S_012554C_2_5_0	0
ANAC060 S_012554C	2	Col-0	0	5	25	9	25-Sep	2020	14/10/2020	NA	2	177	177	0		NA	NA	58	15	0	ANAC060 S_012554C_2_5_0	0
ANAC060 S_012554C	2	Col-0	0	5	25	9	25-Sep	2020	14/10/2020	NA	2	177	177	0		NA	NA	58	16	0	ANAC060 S_012554C_2_5_0	0
ANAC060 S_012554C	2	Col-0	0	5	25	9	25-Sep	2020	14/10/2020	NA	2	177	177	0		NA	NA	58	17	0	ANAC060 S_012554C_2_5_0	0
ANAC060 S_012554C	2	Col-0	0	5	25	9	25-Sep	2020	14/10/2020	NA	2	177	177	0		NA	NA	58	18	0	ANAC060 S_012554C_2_5_0	0
ANAC060 S_012554C	2	Col-0	0	5	25	9	25-Sep	2020	14/10/2020	NA	2	177	177	0		NA	NA	58	19	0	ANAC060 S_012554C_2_5_0	0
ANAC060 S_012554C	2	Col-0	1	5	25	9	25-Sep	2020	14/10/2020	NA	2	172	172	0		NA	NA	61	1	0	ANAC060 S_012554C_2_5_1	0
ANAC060 S_012554C	2	Col-0	1	5	25	9	25-Sep	2020	14/10/2020	NA	2	172	172	0		NA	NA	61	2	2	ANAC060 S_012554C_2_5_1	1.162790698
ANAC060 S_012554C	2	Col-0	1	5	25	9	25-Sep	2020	14/10/2020	NA	2	172	172	0		NA	NA	61	3	44	ANAC060 S_012554C_2_5_1	25.58139535
ANAC060 S_012554C	2	Col-0	1	5	25	9	25-Sep	2020	14/10/2020	NA	2	172	172	0		NA	NA	61	4	101	ANAC060 S_012554C_2_5_1	58.72093023
ANAC060 S_012554C	2	Col-0	1	5	25	9	25-Sep	2020	14/10/2020	NA	2	172	172	0		NA	NA	61	5	24	ANAC060 S_012554C_2_5_1	13.95348837
ANAC060 S_012554C	2	Col-0	1	5	25	9	25-Sep	2020	14/10/2020	NA	2	172	172	0		NA	NA	61	6	0	ANAC060 S_012554C_2_5_1	0
ANAC060 S_012554C	2	Col-0	1	5	25	9	25-Sep	2020	14/10/2020	NA	2	172	172	0		NA	NA	61	7	0	ANAC060 S_012554C_2_5_1	0
ANAC060 S_012554C	2	Col-0	1	5	25	9	25-Sep	2020	14/10/2020	NA	2	172	172	0		NA	NA	61	8	0	ANAC060 S_012554C_2_5_1	0
ANAC060 S_012554C	2	Col-0	1	5	25	9	25-Sep	2020	14/10/2020	NA	2	172	172	0		NA	NA	61	9	0	ANAC060 S_012554C_2_5_1	0
ANAC060 S_012554C	2	Col-0	1	5	25	9	25-Sep	2020	14/10/2020	NA	2	172	172	0		NA	NA	61	10	0	ANAC060 S_012554C_2_5_1	0
ANAC060 S_012554C	2	Col-0	1	5	25	9	25-Sep	2020	14/10/2020	NA	2	172	172	0		NA	NA	61	11	0	ANAC060 S_012554C_2_5_1	0
ANAC060 S_012554C	2	Col-0	1	5	25	9	25-Sep	2020	14/10/2020	NA	2	172	172	0		NA	NA	61	12	0	ANAC060 S_012554C_2_5_1	0
ANAC060 S_012554C	2	Col-0	1	5	25	9	25-Sep	2020	14/10/2020	NA	2	172	172	0		NA	NA	61	13	0	ANAC060 S_012554C_2_5_1	0
ANAC060 S_012554C	2	Col-0	1	5	25	9	25-Sep	2020	14/10/2020	NA	2	172	172	0		NA	NA	61	14	0	ANAC060 S_012554C_2_5_1	0
ANAC060 S_012554C	2	Col-0	1	5	25	9	25-Sep	2020	14/10/2020	NA	2	172	172	0		NA	NA	61	15	0	ANAC060 S_012554C_2_5_1	0
ANAC060 S_012554C	2	Col-0	1	5	25	9	25-Sep	2020	14/10/2020	NA	2	172	172	0		NA	NA	61	16	1	ANAC060 S_012554C_2_5_1	0.581395349
ANAC060 S_012554C	2	Col-0	1	5	25	9	25-Sep	2020	14/10/2020	NA	2	172	172	0		NA	NA	61	17	0	ANAC060 S_012554C_2_5_1	0
ANAC060 S_012554C	2	Col-0	1	5	25	9	25-Sep	2020	14/10/2020	NA	2	172	172	0		NA	NA	61	18	0	ANAC060 S_012554C_2_5_1	0
ANAC060 S_012554C	2	Col-0	1	5	25	9	25-Sep	2020	14/10/2020	NA	2	172	172	0		NA	NA	61	19	0	ANAC060 S_012554C_2_5_1	0
ANAC060 S_012554C	2	Col-0	5	5	25	9	25-Sep	2020	14/10/2020	NA	2	38	165	127		NA	NA	64	1	0	ANAC060 S_012554C_2_5_5	0
ANAC060 S_012554C	2	Col-0	5	5	25	9	25-Sep	2020	14/10/2020	NA	2	38	165	127		NA	NA	64	2	0	ANAC060 S_012554C_2_5_5	0
ANAC060 S_012554C	2	Col-0	5	5	25	9	25-Sep	2020	14/10/2020	NA	2	38	165	127		NA	NA	64	3	2	ANAC060 S_012554C_2_5_5	1.212121212
ANAC060 S_012554C	2	Col-0	5	5	25	9	25-Sep	2020	14/10/2020	NA	2	38	165	127		NA	NA	64	4	7	ANAC060 S_012554C_2_5_5	4.242424242
ANAC060 S_012554C	2	Col-0	5	5	25	9	25-Sep	2020	14/10/2020	NA	2	38	165	127		NA	NA	64	5	12	ANAC060 S_012554C_2_5_5	7.272727273
ANAC060 S_012554C	2	Col-0	5	5	25	9	25-Sep	2020	14/10/2020	NA	2	38	165	127		NA	NA	64	6	4	ANAC060 S_012554C_2_5_5	2.424242424
ANAC060 S_012554C	2	Col-0	5	5	25	9	25-Sep	2020	14/10/2020	NA	2	38	165	127		NA	NA	64	7	4	ANAC060 S_012554C_2_5_5	2.424242424
ANAC060 S_012554C	2	Col-0	5	5	25	9	25-Sep	2020	14/10/2020	NA	2	38	165	127		NA	NA	64	8	3	ANAC060 S_012554C_2_5_5	1.818181818
ANAC060 S_012554C	2	Col-0	5	5	25	9	25-Sep	2020	14/10/2020	NA	2	38	165	127		NA	NA	64	9	2	ANAC060 S_012554C_2_5_5	1.212121212
ANAC060 S_012554C	2	Col-0	5	5	25	9	25-Sep	2020	14/10/2020	NA	2	38	165	127		NA	NA	64	10	3	ANAC060 S_012554C_2_5_5	1.818181818
ANAC060 S_012554C	2	Col-0	5	5	25	9	25-Sep	2020	14/10/2020	NA	2	38	165	127		NA	NA	64	11	0	ANAC060 S_012554C_2_5_5	0
ANAC060 S_012554C	2	Col-0	5	5	25	9	25-Sep	2020	14/10/2020	NA	2	38	165	127		NA	NA	64	12	1	ANAC060 S_012554C_2_5_5	0.606060606
ANAC060 S_012554C	2	Col-0	5	5	25	9	25-Sep	2020	14/10/2020	NA	2	38	165	127		NA	NA	64	13	0	ANAC060 S_012554C_2_5_5	0
ANAC060 S_012554C	2	Col-0	5	5	25	9	25-Sep	2020	14/10/2020	NA	2	38	165	127		NA	NA	64	14	0	ANAC060 S_012554C_2_5_5	0
ANAC060 S_012554C	2	Col-0	5	5	25	9	25-Sep	2020	14/10/2020	NA	2	38	165	127		NA	NA	64	15	0	ANAC060 S_012554C_2_5_5	0
ANAC060 S_012554C	2	Col-0	5	5	25	9	25-Sep	2020	14/10/2020	NA	2	38	165	127		NA	NA	64	16	0	ANAC060 S_012554C_2_5_5	0
ANAC060 S_012554C	2	Col-0	5	5	25	9	25-Sep	2020	14/10/2020	NA	2	38	165	127		NA	NA	64	17	0	ANAC060 S_012554C_2_5_5	0
ANAC060 S_012554C	2	Col-0	5	5	25	9	25-Sep	2020	14/10/2020	NA	2	38	165	127		NA	NA	64	18	0	ANAC060 S_012554C_2_5_5	0
ANAC060 S_012554C	2	Col-0	5	5	25	9	25-Sep	2020	14/10/2020	NA	2	38	165	127		NA	NA	64	19	0	ANAC060 S_012554C_2_5_5	0
ANAC060 S_012554C	2	Col-0	10	5	25	9	25-Sep	2020	14/10/2020	NA	2	8	186	178		NA	NA	67	1	0	ANAC060 S_012554C_2_5_10	0
ANAC060 S_012554C	2	Col-0	10	5	25	9	25-Sep	2020	14/10/2020	NA	2	8	186	178		NA	NA	67	2	0	ANAC060 S_012554C_2_5_10	0
ANAC060 S_012554C	2	Col-0	10	5	25	9	25-Sep	2020	14/10/2020	NA	2	8	186	178		NA	NA	67	3	1	ANAC060 S_012554C_2_5_10	0.537634409
ANAC060 S_012554C	2	Col-0	10	5	25	9	25-Sep	2020	14/10/2020	NA	2	8	186	178		NA	NA	67	4	2	ANAC060 S_012554C_2_5_10	1.075268817
ANAC060 S_012554C	2	Col-0	10	5	25	9	25-Sep	2020	14/10/2020	NA	2	8	186	178		NA	NA	67	5	1	ANAC060 S_012554C_2_5_10	0.537634409
ANAC060 S_012554C	2	Col-0	10	5	25	9	25-Sep	2020	14/10/2020	NA	2	8	186	178		NA	NA	67	6	1	ANAC060 S_012554C_2_5_10	0.537634409
ANAC060 S_012554C	2	Col-0	10	5	25	9	25-Sep	2020	14/10/2020	NA	2	8	186	178		NA	NA	67	7	3	ANAC060 S_012554C_2_5_10	1.612903226
ANAC060 S_012554C	2	Col-0	10	5	25	9	25-Sep	2020	14/10/2020	NA	2	8	186	178		NA	NA	67	8	0	ANAC060 S_012554C_2_5_10	0
ANAC060 S_012554C	2	Col-0	10	5	25	9	25-Sep	2020	14/10/2020	NA	2	8	186	178		NA	NA	67	9	0	ANAC060 S_012554C_2_5_10	0
ANAC060 S_012554C	2	Col-0	10	5	25	9	25-Sep	2020	14/10/2020	NA	2	8	186	178		NA	NA	67	10	0	ANAC060 S_012554C_2_5_10	0
ANAC060 S_012554C	2	Col-0	10	5	25	9	25-Sep	2020	14/10/2020	NA	2	8	186	178		NA	NA	67	11	0	ANAC060 S_012554C_2_5_10	0
ANAC060 S_012554C	2	Col-0	10	5	25	9	25-Sep	2020	14/10/2020	NA	2	8	186	178		NA	NA	67	12	0	ANAC060 S_012554C_2_5_10	0
ANAC060 S_012554C	2	Col-0	10	5	25	9	25-Sep	2020	14/10/2020	NA	2	8	186	178		NA	NA	67	13	0	ANAC060 S_012554C_2_5_10	0
ANAC060 S_012554C	2	Col-0	10	5	25	9	25-Sep	2020	14/10/2020	NA	2	8	186	178		NA	NA	67	14	0	ANAC060 S_012554C_2_5_10	0
ANAC060 S_012554C	2	Col-0	10	5	25	9	25-Sep	2020	14/10/2020	NA	2	8	186	178		NA	NA	67	15	0	ANAC060 S_012554C_2_5_10	0
ANAC060 S_012554C	2	Col-0	10	5	25	9	25-Sep	2020	14/10/2020	NA	2	8	186	178		NA	NA	67	16	0	ANAC060 S_012554C_2_5_10	0
ANAC060 S_012554C	2	Col-0	10	5	25	9	25-Sep	2020	14/10/2020	NA	2	8	186	178		NA	NA	67	17	0	ANAC060 S_012554C_2_5_10	0
ANAC060 S_012554C	2	Col-0	10	5	25	9	25-Sep	2020	14/10/2020	NA	2	8	186	178		NA	NA	67	18	0	ANAC060 S_012554C_2_5_10	0
ANAC060 S_012554C	2	Col-0	10	5	25	9	25-Sep	2020	14/10/2020	NA	2	8	186	178		NA	NA	67	19	0	ANAC060 S_012554C_2_5_10	0
ANAC060 S_012554C	2	Col-0	0	8	5	11	05-Nov	2020	23/11/2020	NA	30	191	191	0		NA	NA	158	1	0	ANAC060 S_012554C_2_8_0	0
ANAC060 S_012554C	2	Col-0	0	8	5	11	05-Nov	2020	23/11/2020	NA	30	191	191	0		NA	NA	158	2	16	ANAC060 S_012554C_2_8_0	8.376963351
ANAC060 S_012554C	2	Col-0	0	8	5	11	05-Nov	2020	23/11/2020	NA	30	191	191	0		NA	NA	158	3	173	ANAC060 S_012554C_2_8_0	90.57591623
ANAC060 S_012554C	2	Col-0	0	8	5	11	05-Nov	2020	23/11/2020	NA	30	191	191	0		NA	NA	158	4	1	ANAC060 S_012554C_2_8_0	0.523560209
ANAC060 S_012554C	2	Col-0	0	8	5	11	05-Nov	2020	23/11/2020	NA	30	191	191	0		NA	NA	158	5	1	ANAC060 S_012554C_2_8_0	0.523560209
ANAC060 S_012554C	2	Col-0	0	8	5	11	05-Nov	2020	23/11/2020	NA	30	191	191	0		NA	NA	158	6	0	ANAC060 S_012554C_2_8_0	0
ANAC060 S_012554C	2	Col-0	0	8	5	11	05-Nov	2020	23/11/2020	NA	30	191	191	0		NA	NA	158	7	0	ANAC060 S_012554C_2_8_0	0
ANAC060 S_012554C	2	Col-0	0	8	5	11	05-Nov	2020	23/11/2020	NA	30	191	191	0		NA	NA	158	8	0	ANAC060 S_012554C_2_8_0	0
ANAC060 S_012554C	2	Col-0	0	8	5	11	05-Nov	2020	23/11/2020	NA	30	191	191	0		NA	NA	158	9	0	ANAC060 S_012554C_2_8_0	0
ANAC060 S_012554C	2	Col-0	0	8	5	11	05-Nov	2020	23/11/2020	NA	30	191	191	0		NA	NA	158	10	0	ANAC060 S_012554C_2_8_0	0
ANAC060 S_012554C	2	Col-0	0	8	5	11	05-Nov	2020	23/11/2020	NA	30	191	191	0		NA	NA	158	11	0	ANAC060 S_012554C_2_8_0	0
ANAC060 S_012554C	2	Col-0	0	8	5	11	05-Nov	2020	23/11/2020	NA	30	191	191	0		NA	NA	158	12	0	ANAC060 S_012554C_2_8_0	0
ANAC060 S_012554C	2	Col-0	0	8	5	11	05-Nov	2020	23/11/2020	NA	30	191	191	0		NA	NA	158	13	0	ANAC060 S_012554C_2_8_0	0
ANAC060 S_012554C	2	Col-0	0	8	5	11	05-Nov	2020	23/11/2020	NA	30	191	191	0		NA	NA	158	14	0	ANAC060 S_012554C_2_8_0	0
ANAC060 S_012554C	2	Col-0	0	8	5	11	05-Nov	2020	23/11/2020	NA	30	191	191	0		NA	NA	158	15	0	ANAC060 S_012554C_2_8_0	0
ANAC060 S_012554C	2	Col-0	0	8	5	11	05-Nov	2020	23/11/2020	NA	30	191	191	0		NA	NA	158	16	0	ANAC060 S_012554C_2_8_0	0
ANAC060 S_012554C	2	Col-0	0	8	5	11	05-Nov	2020	23/11/2020	NA	30	191	191	0		NA	NA	158	17	0	ANAC060 S_012554C_2_8_0	0
ANAC060 S_012554C	2	Col-0	0	8	5	11	05-Nov	2020	23/11/2020	NA	30	191	191	0		NA	NA	158	18	0	ANAC060 S_012554C_2_8_0	0
ANAC060 S_012554C	2	Col-0	1	8	5	11	05-Nov	2020	23/11/2020	NA	30	206	208	2		NA	NA	161	1	0	ANAC060 S_012554C_2_8_1	0
ANAC060 S_012554C	2	Col-0	1	8	5	11	05-Nov	2020	23/11/2020	NA	30	206	208	2		NA	NA	161	2	0	ANAC060 S_012554C_2_8_1	0
ANAC060 S_012554C	2	Col-0	1	8	5	11	05-Nov	2020	23/11/2020	NA	30	206	208	2		NA	NA	161	3	79	ANAC060 S_012554C_2_8_1	37.98076923
ANAC060 S_012554C	2	Col-0	1	8	5	11	05-Nov	2020	23/11/2020	NA	30	206	208	2		NA	NA	161	4	110	ANAC060 S_012554C_2_8_1	52.88461538
ANAC060 S_012554C	2	Col-0	1	8	5	11	05-Nov	2020	23/11/2020	NA	30	206	208	2		NA	NA	161	5	10	ANAC060 S_012554C_2_8_1	4.807692308
ANAC060 S_012554C	2	Col-0	1	8	5	11	05-Nov	2020	23/11/2020	NA	30	206	208	2		NA	NA	161	6	6	ANAC060 S_012554C_2_8_1	2.884615385
ANAC060 S_012554C	2	Col-0	1	8	5	11	05-Nov	2020	23/11/2020	NA	30	206	208	2		NA	NA	161	7	1	ANAC060 S_012554C_2_8_1	0.480769231
ANAC060 S_012554C	2	Col-0	1	8	5	11	05-Nov	2020	23/11/2020	NA	30	206	208	2		NA	NA	161	8	0	ANAC060 S_012554C_2_8_1	0
ANAC060 S_012554C	2	Col-0	1	8	5	11	05-Nov	2020	23/11/2020	NA	30	206	208	2		NA	NA	161	9	0	ANAC060 S_012554C_2_8_1	0
ANAC060 S_012554C	2	Col-0	1	8	5	11	05-Nov	2020	23/11/2020	NA	30	206	208	2		NA	NA	161	10	0	ANAC060 S_012554C_2_8_1	0
ANAC060 S_012554C	2	Col-0	1	8	5	11	05-Nov	2020	23/11/2020	NA	30	206	208	2		NA	NA	161	11	0	ANAC060 S_012554C_2_8_1	0
ANAC060 S_012554C	2	Col-0	1	8	5	11	05-Nov	2020	23/11/2020	NA	30	206	208	2		NA	NA	161	12	0	ANAC060 S_012554C_2_8_1	0
ANAC060 S_012554C	2	Col-0	1	8	5	11	05-Nov	2020	23/11/2020	NA	30	206	208	2		NA	NA	161	13	0	ANAC060 S_012554C_2_8_1	0
ANAC060 S_012554C	2	Col-0	1	8	5	11	05-Nov	2020	23/11/2020	NA	30	206	208	2		NA	NA	161	14	0	ANAC060 S_012554C_2_8_1	0
ANAC060 S_012554C	2	Col-0	1	8	5	11	05-Nov	2020	23/11/2020	NA	30	206	208	2		NA	NA	161	15	0	ANAC060 S_012554C_2_8_1	0
ANAC060 S_012554C	2	Col-0	1	8	5	11	05-Nov	2020	23/11/2020	NA	30	206	208	2		NA	NA	161	16	0	ANAC060 S_012554C_2_8_1	0
ANAC060 S_012554C	2	Col-0	1	8	5	11	05-Nov	2020	23/11/2020	NA	30	206	208	2		NA	NA	161	17	0	ANAC060 S_012554C_2_8_1	0
ANAC060 S_012554C	2	Col-0	1	8	5	11	05-Nov	2020	23/11/2020	NA	30	206	208	2		NA	NA	161	18	0	ANAC060 S_012554C_2_8_1	0
ANAC060 S_012554C	2	Col-0	5	8	5	11	05-Nov	2020	23/11/2020	NA	30	8	202	194		NA	NA	164	1	0	ANAC060 S_012554C_2_8_5	0
ANAC060 S_012554C	2	Col-0	5	8	5	11	05-Nov	2020	23/11/2020	NA	30	8	202	194		NA	NA	164	2	0	ANAC060 S_012554C_2_8_5	0
ANAC060 S_012554C	2	Col-0	5	8	5	11	05-Nov	2020	23/11/2020	NA	30	8	202	194		NA	NA	164	3	1	ANAC060 S_012554C_2_8_5	0.495049505
ANAC060 S_012554C	2	Col-0	5	8	5	11	05-Nov	2020	23/11/2020	NA	30	8	202	194		NA	NA	164	4	0	ANAC060 S_012554C_2_8_5	0
ANAC060 S_012554C	2	Col-0	5	8	5	11	05-Nov	2020	23/11/2020	NA	30	8	202	194		NA	NA	164	5	2	ANAC060 S_012554C_2_8_5	0.99009901
ANAC060 S_012554C	2	Col-0	5	8	5	11	05-Nov	2020	23/11/2020	NA	30	8	202	194		NA	NA	164	6	0	ANAC060 S_012554C_2_8_5	0
ANAC060 S_012554C	2	Col-0	5	8	5	11	05-Nov	2020	23/11/2020	NA	30	8	202	194		NA	NA	164	7	0	ANAC060 S_012554C_2_8_5	0
ANAC060 S_012554C	2	Col-0	5	8	5	11	05-Nov	2020	23/11/2020	NA	30	8	202	194		NA	NA	164	8	1	ANAC060 S_012554C_2_8_5	0.495049505
ANAC060 S_012554C	2	Col-0	5	8	5	11	05-Nov	2020	23/11/2020	NA	30	8	202	194		NA	NA	164	9	0	ANAC060 S_012554C_2_8_5	0
ANAC060 S_012554C	2	Col-0	5	8	5	11	05-Nov	2020	23/11/2020	NA	30	8	202	194		NA	NA	164	10	0	ANAC060 S_012554C_2_8_5	0
ANAC060 S_012554C	2	Col-0	5	8	5	11	05-Nov	2020	23/11/2020	NA	30	8	202	194		NA	NA	164	11	1	ANAC060 S_012554C_2_8_5	0.495049505
ANAC060 S_012554C	2	Col-0	5	8	5	11	05-Nov	2020	23/11/2020	NA	30	8	202	194		NA	NA	164	12	0	ANAC060 S_012554C_2_8_5	0
ANAC060 S_012554C	2	Col-0	5	8	5	11	05-Nov	2020	23/11/2020	NA	30	8	202	194		NA	NA	164	13	0	ANAC060 S_012554C_2_8_5	0
ANAC060 S_012554C	2	Col-0	5	8	5	11	05-Nov	2020	23/11/2020	NA	30	8	202	194		NA	NA	164	14	0	ANAC060 S_012554C_2_8_5	0
ANAC060 S_012554C	2	Col-0	5	8	5	11	05-Nov	2020	23/11/2020	NA	30	8	202	194		NA	NA	164	15	0	ANAC060 S_012554C_2_8_5	0
ANAC060 S_012554C	2	Col-0	5	8	5	11	05-Nov	2020	23/11/2020	NA	30	8	202	194		NA	NA	164	16	3	ANAC060 S_012554C_2_8_5	1.485148515
ANAC060 S_012554C	2	Col-0	5	8	5	11	05-Nov	2020	23/11/2020	NA	30	8	202	194		NA	NA	164	17	0	ANAC060 S_012554C_2_8_5	0
ANAC060 S_012554C	2	Col-0	5	8	5	11	05-Nov	2020	23/11/2020	NA	30	8	202	194		NA	NA	164	18	0	ANAC060 S_012554C_2_8_5	0
ANAC060 S_012554C	2	Col-0	10	8	5	11	05-Nov	2020	23/11/2020	NA	30	2	186	184		NA	NA	167	1	0	ANAC060 S_012554C_2_8_10	0
ANAC060 S_012554C	2	Col-0	10	8	5	11	05-Nov	2020	23/11/2020	NA	30	2	186	184		NA	NA	167	2	0	ANAC060 S_012554C_2_8_10	0
ANAC060 S_012554C	2	Col-0	10	8	5	11	05-Nov	2020	23/11/2020	NA	30	2	186	184		NA	NA	167	3	0	ANAC060 S_012554C_2_8_10	0
ANAC060 S_012554C	2	Col-0	10	8	5	11	05-Nov	2020	23/11/2020	NA	30	2	186	184		NA	NA	167	4	1	ANAC060 S_012554C_2_8_10	0.537634409
ANAC060 S_012554C	2	Col-0	10	8	5	11	05-Nov	2020	23/11/2020	NA	30	2	186	184		NA	NA	167	5	0	ANAC060 S_012554C_2_8_10	0
ANAC060 S_012554C	2	Col-0	10	8	5	11	05-Nov	2020	23/11/2020	NA	30	2	186	184		NA	NA	167	6	0	ANAC060 S_012554C_2_8_10	0
ANAC060 S_012554C	2	Col-0	10	8	5	11	05-Nov	2020	23/11/2020	NA	30	2	186	184		NA	NA	167	7	0	ANAC060 S_012554C_2_8_10	0
ANAC060 S_012554C	2	Col-0	10	8	5	11	05-Nov	2020	23/11/2020	NA	30	2	186	184		NA	NA	167	8	0	ANAC060 S_012554C_2_8_10	0
ANAC060 S_012554C	2	Col-0	10	8	5	11	05-Nov	2020	23/11/2020	NA	30	2	186	184		NA	NA	167	9	0	ANAC060 S_012554C_2_8_10	0
ANAC060 S_012554C	2	Col-0	10	8	5	11	05-Nov	2020	23/11/2020	NA	30	2	186	184		NA	NA	167	10	0	ANAC060 S_012554C_2_8_10	0
ANAC060 S_012554C	2	Col-0	10	8	5	11	05-Nov	2020	23/11/2020	NA	30	2	186	184		NA	NA	167	11	0	ANAC060 S_012554C_2_8_10	0
ANAC060 S_012554C	2	Col-0	10	8	5	11	05-Nov	2020	23/11/2020	NA	30	2	186	184		NA	NA	167	12	0	ANAC060 S_012554C_2_8_10	0
ANAC060 S_012554C	2	Col-0	10	8	5	11	05-Nov	2020	23/11/2020	NA	30	2	186	184		NA	NA	167	13	0	ANAC060 S_012554C_2_8_10	0
ANAC060 S_012554C	2	Col-0	10	8	5	11	05-Nov	2020	23/11/2020	NA	30	2	186	184		NA	NA	167	14	0	ANAC060 S_012554C_2_8_10	0
ANAC060 S_012554C	2	Col-0	10	8	5	11	05-Nov	2020	23/11/2020	NA	30	2	186	184		NA	NA	167	15	1	ANAC060 S_012554C_2_8_10	0.537634409
ANAC060 S_012554C	2	Col-0	10	8	5	11	05-Nov	2020	23/11/2020	NA	30	2	186	184		NA	NA	167	16	0	ANAC060 S_012554C_2_8_10	0
ANAC060 S_012554C	2	Col-0	10	8	5	11	05-Nov	2020	23/11/2020	NA	30	2	186	184		NA	NA	167	17	0	ANAC060 S_012554C_2_8_10	0
ANAC060 S_012554C	2	Col-0	10	8	5	11	05-Nov	2020	23/11/2020	NA	30	2	186	184		NA	NA	167	18	0	ANAC060 S_012554C_2_8_10	0
ANAC060 S_012554C	3	Col-0	0	4	NA	NA	26-Feb	2018	08-Mar	NA	7	142	148	6		NA	NA	37	1	0	ANAC060 S_012554C_3_4_0	0
ANAC060 S_012554C	3	Col-0	0	4	NA	NA	26-Feb	2018	08-Mar	NA	7	142	148	6		NA	NA	37	2	0	ANAC060 S_012554C_3_4_0	0
ANAC060 S_012554C	3	Col-0	0	4	NA	NA	26-Feb	2018	08-Mar	NA	7	142	148	6		NA	NA	37	3	87	ANAC060 S_012554C_3_4_0	58.78378378
ANAC060 S_012554C	3	Col-0	0	4	NA	NA	26-Feb	2018	08-Mar	NA	7	142	148	6		NA	NA	37	4	49	ANAC060 S_012554C_3_4_0	33.10810811
ANAC060 S_012554C	3	Col-0	0	4	NA	NA	26-Feb	2018	08-Mar	NA	7	142	148	6		NA	NA	37	5	2	ANAC060 S_012554C_3_4_0	1.351351351
ANAC060 S_012554C	3	Col-0	0	4	NA	NA	26-Feb	2018	08-Mar	NA	7	142	148	6		NA	NA	37	6	4	ANAC060 S_012554C_3_4_0	2.702702703
ANAC060 S_012554C	3	Col-0	0	4	NA	NA	26-Feb	2018	08-Mar	NA	7	142	148	6		NA	NA	37	7	0	ANAC060 S_012554C_3_4_0	0
ANAC060 S_012554C	3	Col-0	0	4	NA	NA	26-Feb	2018	08-Mar	NA	7	142	148	6		NA	NA	37	8	0	ANAC060 S_012554C_3_4_0	0
ANAC060 S_012554C	3	Col-0	0	4	NA	NA	26-Feb	2018	08-Mar	NA	7	142	148	6		NA	NA	37	9	0	ANAC060 S_012554C_3_4_0	0
ANAC060 S_012554C	3	Col-0	0	4	NA	NA	26-Feb	2018	08-Mar	NA	7	142	148	6		NA	NA	37	10	0	ANAC060 S_012554C_3_4_0	0
ANAC060 S_012554C	3	Col-0	5	4	NA	NA	26-Feb	2018	08-Mar	NA	7	35	131	96	none germinated outside scoring period.	NA	NA	38	1	0	ANAC060 S_012554C_3_4_5	0
ANAC060 S_012554C	3	Col-0	5	4	NA	NA	26-Feb	2018	08-Mar	NA	7	35	131	96	none germinated outside scoring period.	NA	NA	38	2	0	ANAC060 S_012554C_3_4_5	0
ANAC060 S_012554C	3	Col-0	5	4	NA	NA	26-Feb	2018	08-Mar	NA	7	35	131	96	none germinated outside scoring period.	NA	NA	38	3	13	ANAC060 S_012554C_3_4_5	9.923664122
ANAC060 S_012554C	3	Col-0	5	4	NA	NA	26-Feb	2018	08-Mar	NA	7	35	131	96	none germinated outside scoring period.	NA	NA	38	4	3	ANAC060 S_012554C_3_4_5	2.290076336
ANAC060 S_012554C	3	Col-0	5	4	NA	NA	26-Feb	2018	08-Mar	NA	7	35	131	96	none germinated outside scoring period.	NA	NA	38	5	12	ANAC060 S_012554C_3_4_5	9.160305344
ANAC060 S_012554C	3	Col-0	5	4	NA	NA	26-Feb	2018	08-Mar	NA	7	35	131	96	none germinated outside scoring period.	NA	NA	38	6	1	ANAC060 S_012554C_3_4_5	0.763358779
ANAC060 S_012554C	3	Col-0	5	4	NA	NA	26-Feb	2018	08-Mar	NA	7	35	131	96	none germinated outside scoring period.	NA	NA	38	7	2	ANAC060 S_012554C_3_4_5	1.526717557
ANAC060 S_012554C	3	Col-0	5	4	NA	NA	26-Feb	2018	08-Mar	NA	7	35	131	96	none germinated outside scoring period.	NA	NA	38	8	2	ANAC060 S_012554C_3_4_5	1.526717557
ANAC060 S_012554C	3	Col-0	5	4	NA	NA	26-Feb	2018	08-Mar	NA	7	35	131	96	none germinated outside scoring period.	NA	NA	38	9	1	ANAC060 S_012554C_3_4_5	0.763358779
ANAC060 S_012554C	3	Col-0	5	4	NA	NA	26-Feb	2018	08-Mar	NA	7	35	131	96	none germinated outside scoring period.	NA	NA	38	10	1	ANAC060 S_012554C_3_4_5	0.763358779
ANAC060 S_012554C	3	Col-0	0	5	25	9	25-Sep	2020	14/10/2020	NA	2	162	165	3		NA	NA	59	1	0	ANAC060 S_012554C_3_5_0	0
ANAC060 S_012554C	3	Col-0	0	5	25	9	25-Sep	2020	14/10/2020	NA	2	162	165	3		NA	NA	59	2	1	ANAC060 S_012554C_3_5_0	0.606060606
ANAC060 S_012554C	3	Col-0	0	5	25	9	25-Sep	2020	14/10/2020	NA	2	162	165	3		NA	NA	59	3	124	ANAC060 S_012554C_3_5_0	75.15151515
ANAC060 S_012554C	3	Col-0	0	5	25	9	25-Sep	2020	14/10/2020	NA	2	162	165	3		NA	NA	59	4	33	ANAC060 S_012554C_3_5_0	20
ANAC060 S_012554C	3	Col-0	0	5	25	9	25-Sep	2020	14/10/2020	NA	2	162	165	3		NA	NA	59	5	4	ANAC060 S_012554C_3_5_0	2.424242424
ANAC060 S_012554C	3	Col-0	0	5	25	9	25-Sep	2020	14/10/2020	NA	2	162	165	3		NA	NA	59	6	0	ANAC060 S_012554C_3_5_0	0
ANAC060 S_012554C	3	Col-0	0	5	25	9	25-Sep	2020	14/10/2020	NA	2	162	165	3		NA	NA	59	7	0	ANAC060 S_012554C_3_5_0	0
ANAC060 S_012554C	3	Col-0	0	5	25	9	25-Sep	2020	14/10/2020	NA	2	162	165	3		NA	NA	59	8	0	ANAC060 S_012554C_3_5_0	0
ANAC060 S_012554C	3	Col-0	0	5	25	9	25-Sep	2020	14/10/2020	NA	2	162	165	3		NA	NA	59	9	0	ANAC060 S_012554C_3_5_0	0
ANAC060 S_012554C	3	Col-0	0	5	25	9	25-Sep	2020	14/10/2020	NA	2	162	165	3		NA	NA	59	10	0	ANAC060 S_012554C_3_5_0	0
ANAC060 S_012554C	3	Col-0	0	5	25	9	25-Sep	2020	14/10/2020	NA	2	162	165	3		NA	NA	59	11	0	ANAC060 S_012554C_3_5_0	0
ANAC060 S_012554C	3	Col-0	0	5	25	9	25-Sep	2020	14/10/2020	NA	2	162	165	3		NA	NA	59	12	0	ANAC060 S_012554C_3_5_0	0
ANAC060 S_012554C	3	Col-0	0	5	25	9	25-Sep	2020	14/10/2020	NA	2	162	165	3		NA	NA	59	13	0	ANAC060 S_012554C_3_5_0	0
ANAC060 S_012554C	3	Col-0	0	5	25	9	25-Sep	2020	14/10/2020	NA	2	162	165	3		NA	NA	59	14	0	ANAC060 S_012554C_3_5_0	0
ANAC060 S_012554C	3	Col-0	0	5	25	9	25-Sep	2020	14/10/2020	NA	2	162	165	3		NA	NA	59	15	0	ANAC060 S_012554C_3_5_0	0
ANAC060 S_012554C	3	Col-0	0	5	25	9	25-Sep	2020	14/10/2020	NA	2	162	165	3		NA	NA	59	16	0	ANAC060 S_012554C_3_5_0	0
ANAC060 S_012554C	3	Col-0	0	5	25	9	25-Sep	2020	14/10/2020	NA	2	162	165	3		NA	NA	59	17	0	ANAC060 S_012554C_3_5_0	0
ANAC060 S_012554C	3	Col-0	0	5	25	9	25-Sep	2020	14/10/2020	NA	2	162	165	3		NA	NA	59	18	0	ANAC060 S_012554C_3_5_0	0
ANAC060 S_012554C	3	Col-0	0	5	25	9	25-Sep	2020	14/10/2020	NA	2	162	165	3		NA	NA	59	19	0	ANAC060 S_012554C_3_5_0	0
ANAC060 S_012554C	3	Col-0	1	5	25	9	25-Sep	2020	14/10/2020	NA	2	165	165	0		NA	NA	62	1	0	ANAC060 S_012554C_3_5_1	0
ANAC060 S_012554C	3	Col-0	1	5	25	9	25-Sep	2020	14/10/2020	NA	2	165	165	0		NA	NA	62	2	0	ANAC060 S_012554C_3_5_1	0
ANAC060 S_012554C	3	Col-0	1	5	25	9	25-Sep	2020	14/10/2020	NA	2	165	165	0		NA	NA	62	3	17	ANAC060 S_012554C_3_5_1	10.3030303
ANAC060 S_012554C	3	Col-0	1	5	25	9	25-Sep	2020	14/10/2020	NA	2	165	165	0		NA	NA	62	4	105	ANAC060 S_012554C_3_5_1	63.63636364
ANAC060 S_012554C	3	Col-0	1	5	25	9	25-Sep	2020	14/10/2020	NA	2	165	165	0		NA	NA	62	5	33	ANAC060 S_012554C_3_5_1	20
ANAC060 S_012554C	3	Col-0	1	5	25	9	25-Sep	2020	14/10/2020	NA	2	165	165	0		NA	NA	62	6	3	ANAC060 S_012554C_3_5_1	1.818181818
ANAC060 S_012554C	3	Col-0	1	5	25	9	25-Sep	2020	14/10/2020	NA	2	165	165	0		NA	NA	62	7	6	ANAC060 S_012554C_3_5_1	3.636363636
ANAC060 S_012554C	3	Col-0	1	5	25	9	25-Sep	2020	14/10/2020	NA	2	165	165	0		NA	NA	62	8	0	ANAC060 S_012554C_3_5_1	0
ANAC060 S_012554C	3	Col-0	1	5	25	9	25-Sep	2020	14/10/2020	NA	2	165	165	0		NA	NA	62	9	1	ANAC060 S_012554C_3_5_1	0.606060606
ANAC060 S_012554C	3	Col-0	1	5	25	9	25-Sep	2020	14/10/2020	NA	2	165	165	0		NA	NA	62	10	0	ANAC060 S_012554C_3_5_1	0
ANAC060 S_012554C	3	Col-0	1	5	25	9	25-Sep	2020	14/10/2020	NA	2	165	165	0		NA	NA	62	11	0	ANAC060 S_012554C_3_5_1	0
ANAC060 S_012554C	3	Col-0	1	5	25	9	25-Sep	2020	14/10/2020	NA	2	165	165	0		NA	NA	62	12	0	ANAC060 S_012554C_3_5_1	0
ANAC060 S_012554C	3	Col-0	1	5	25	9	25-Sep	2020	14/10/2020	NA	2	165	165	0		NA	NA	62	13	0	ANAC060 S_012554C_3_5_1	0
ANAC060 S_012554C	3	Col-0	1	5	25	9	25-Sep	2020	14/10/2020	NA	2	165	165	0		NA	NA	62	14	0	ANAC060 S_012554C_3_5_1	0
ANAC060 S_012554C	3	Col-0	1	5	25	9	25-Sep	2020	14/10/2020	NA	2	165	165	0		NA	NA	62	15	0	ANAC060 S_012554C_3_5_1	0
ANAC060 S_012554C	3	Col-0	1	5	25	9	25-Sep	2020	14/10/2020	NA	2	165	165	0		NA	NA	62	16	0	ANAC060 S_012554C_3_5_1	0
ANAC060 S_012554C	3	Col-0	1	5	25	9	25-Sep	2020	14/10/2020	NA	2	165	165	0		NA	NA	62	17	0	ANAC060 S_012554C_3_5_1	0
ANAC060 S_012554C	3	Col-0	1	5	25	9	25-Sep	2020	14/10/2020	NA	2	165	165	0		NA	NA	62	18	0	ANAC060 S_012554C_3_5_1	0
ANAC060 S_012554C	3	Col-0	1	5	25	9	25-Sep	2020	14/10/2020	NA	2	165	165	0		NA	NA	62	19	0	ANAC060 S_012554C_3_5_1	0
ANAC060 S_012554C	3	Col-0	5	5	25	9	25-Sep	2020	14/10/2020	NA	2	105	171	66		NA	NA	65	1	0	ANAC060 S_012554C_3_5_5	0
ANAC060 S_012554C	3	Col-0	5	5	25	9	25-Sep	2020	14/10/2020	NA	2	105	171	66		NA	NA	65	2	0	ANAC060 S_012554C_3_5_5	0
ANAC060 S_012554C	3	Col-0	5	5	25	9	25-Sep	2020	14/10/2020	NA	2	105	171	66		NA	NA	65	3	4	ANAC060 S_012554C_3_5_5	2.339181287
ANAC060 S_012554C	3	Col-0	5	5	25	9	25-Sep	2020	14/10/2020	NA	2	105	171	66		NA	NA	65	4	18	ANAC060 S_012554C_3_5_5	10.52631579
ANAC060 S_012554C	3	Col-0	5	5	25	9	25-Sep	2020	14/10/2020	NA	2	105	171	66		NA	NA	65	5	33	ANAC060 S_012554C_3_5_5	19.29824561
ANAC060 S_012554C	3	Col-0	5	5	25	9	25-Sep	2020	14/10/2020	NA	2	105	171	66		NA	NA	65	6	28	ANAC060 S_012554C_3_5_5	16.37426901
ANAC060 S_012554C	3	Col-0	5	5	25	9	25-Sep	2020	14/10/2020	NA	2	105	171	66		NA	NA	65	7	5	ANAC060 S_012554C_3_5_5	2.923976608
ANAC060 S_012554C	3	Col-0	5	5	25	9	25-Sep	2020	14/10/2020	NA	2	105	171	66		NA	NA	65	8	5	ANAC060 S_012554C_3_5_5	2.923976608
ANAC060 S_012554C	3	Col-0	5	5	25	9	25-Sep	2020	14/10/2020	NA	2	105	171	66		NA	NA	65	9	5	ANAC060 S_012554C_3_5_5	2.923976608
ANAC060 S_012554C	3	Col-0	5	5	25	9	25-Sep	2020	14/10/2020	NA	2	105	171	66		NA	NA	65	10	3	ANAC060 S_012554C_3_5_5	1.754385965
ANAC060 S_012554C	3	Col-0	5	5	25	9	25-Sep	2020	14/10/2020	NA	2	105	171	66		NA	NA	65	11	0	ANAC060 S_012554C_3_5_5	0
ANAC060 S_012554C	3	Col-0	5	5	25	9	25-Sep	2020	14/10/2020	NA	2	105	171	66		NA	NA	65	12	1	ANAC060 S_012554C_3_5_5	0.584795322
ANAC060 S_012554C	3	Col-0	5	5	25	9	25-Sep	2020	14/10/2020	NA	2	105	171	66		NA	NA	65	13	1	ANAC060 S_012554C_3_5_5	0.584795322
ANAC060 S_012554C	3	Col-0	5	5	25	9	25-Sep	2020	14/10/2020	NA	2	105	171	66		NA	NA	65	14	0	ANAC060 S_012554C_3_5_5	0
ANAC060 S_012554C	3	Col-0	5	5	25	9	25-Sep	2020	14/10/2020	NA	2	105	171	66		NA	NA	65	15	0	ANAC060 S_012554C_3_5_5	0
ANAC060 S_012554C	3	Col-0	5	5	25	9	25-Sep	2020	14/10/2020	NA	2	105	171	66		NA	NA	65	16	1	ANAC060 S_012554C_3_5_5	0.584795322
ANAC060 S_012554C	3	Col-0	5	5	25	9	25-Sep	2020	14/10/2020	NA	2	105	171	66		NA	NA	65	17	0	ANAC060 S_012554C_3_5_5	0
ANAC060 S_012554C	3	Col-0	5	5	25	9	25-Sep	2020	14/10/2020	NA	2	105	171	66		NA	NA	65	18	0	ANAC060 S_012554C_3_5_5	0
ANAC060 S_012554C	3	Col-0	5	5	25	9	25-Sep	2020	14/10/2020	NA	2	105	171	66		NA	NA	65	19	1	ANAC060 S_012554C_3_5_5	0.584795322
ANAC060 S_012554C	3	Col-0	10	5	25	9	25-Sep	2020	14/10/2020	NA	2	7	182	175		NA	NA	68	1	0	ANAC060 S_012554C_3_5_10	0
ANAC060 S_012554C	3	Col-0	10	5	25	9	25-Sep	2020	14/10/2020	NA	2	7	182	175		NA	NA	68	2	0	ANAC060 S_012554C_3_5_10	0
ANAC060 S_012554C	3	Col-0	10	5	25	9	25-Sep	2020	14/10/2020	NA	2	7	182	175		NA	NA	68	3	2	ANAC060 S_012554C_3_5_10	1.098901099
ANAC060 S_012554C	3	Col-0	10	5	25	9	25-Sep	2020	14/10/2020	NA	2	7	182	175		NA	NA	68	4	3	ANAC060 S_012554C_3_5_10	1.648351648
ANAC060 S_012554C	3	Col-0	10	5	25	9	25-Sep	2020	14/10/2020	NA	2	7	182	175		NA	NA	68	5	0	ANAC060 S_012554C_3_5_10	0
ANAC060 S_012554C	3	Col-0	10	5	25	9	25-Sep	2020	14/10/2020	NA	2	7	182	175		NA	NA	68	6	2	ANAC060 S_012554C_3_5_10	1.098901099
ANAC060 S_012554C	3	Col-0	10	5	25	9	25-Sep	2020	14/10/2020	NA	2	7	182	175		NA	NA	68	7	0	ANAC060 S_012554C_3_5_10	0
ANAC060 S_012554C	3	Col-0	10	5	25	9	25-Sep	2020	14/10/2020	NA	2	7	182	175		NA	NA	68	8	0	ANAC060 S_012554C_3_5_10	0
ANAC060 S_012554C	3	Col-0	10	5	25	9	25-Sep	2020	14/10/2020	NA	2	7	182	175		NA	NA	68	9	0	ANAC060 S_012554C_3_5_10	0
ANAC060 S_012554C	3	Col-0	10	5	25	9	25-Sep	2020	14/10/2020	NA	2	7	182	175		NA	NA	68	10	0	ANAC060 S_012554C_3_5_10	0
ANAC060 S_012554C	3	Col-0	10	5	25	9	25-Sep	2020	14/10/2020	NA	2	7	182	175		NA	NA	68	11	0	ANAC060 S_012554C_3_5_10	0
ANAC060 S_012554C	3	Col-0	10	5	25	9	25-Sep	2020	14/10/2020	NA	2	7	182	175		NA	NA	68	12	0	ANAC060 S_012554C_3_5_10	0
ANAC060 S_012554C	3	Col-0	10	5	25	9	25-Sep	2020	14/10/2020	NA	2	7	182	175		NA	NA	68	13	0	ANAC060 S_012554C_3_5_10	0
ANAC060 S_012554C	3	Col-0	10	5	25	9	25-Sep	2020	14/10/2020	NA	2	7	182	175		NA	NA	68	14	0	ANAC060 S_012554C_3_5_10	0
ANAC060 S_012554C	3	Col-0	10	5	25	9	25-Sep	2020	14/10/2020	NA	2	7	182	175		NA	NA	68	15	0	ANAC060 S_012554C_3_5_10	0
ANAC060 S_012554C	3	Col-0	10	5	25	9	25-Sep	2020	14/10/2020	NA	2	7	182	175		NA	NA	68	16	0	ANAC060 S_012554C_3_5_10	0
ANAC060 S_012554C	3	Col-0	10	5	25	9	25-Sep	2020	14/10/2020	NA	2	7	182	175		NA	NA	68	17	0	ANAC060 S_012554C_3_5_10	0
ANAC060 S_012554C	3	Col-0	10	5	25	9	25-Sep	2020	14/10/2020	NA	2	7	182	175		NA	NA	68	18	0	ANAC060 S_012554C_3_5_10	0
ANAC060 S_012554C	3	Col-0	10	5	25	9	25-Sep	2020	14/10/2020	NA	2	7	182	175		NA	NA	68	19	0	ANAC060 S_012554C_3_5_10	0
ANAC060 S_012554C	3	Col-0	0	8	5	11	05-Nov	2020	23/11/2020	NA	30	197	197	0		NA	NA	159	1	0	ANAC060 S_012554C_3_8_0	0
ANAC060 S_012554C	3	Col-0	0	8	5	11	05-Nov	2020	23/11/2020	NA	30	197	197	0		NA	NA	159	2	27	ANAC060 S_012554C_3_8_0	13.70558376
ANAC060 S_012554C	3	Col-0	0	8	5	11	05-Nov	2020	23/11/2020	NA	30	197	197	0		NA	NA	159	3	169	ANAC060 S_012554C_3_8_0	85.78680203
ANAC060 S_012554C	3	Col-0	0	8	5	11	05-Nov	2020	23/11/2020	NA	30	197	197	0		NA	NA	159	4	1	ANAC060 S_012554C_3_8_0	0.507614213
ANAC060 S_012554C	3	Col-0	0	8	5	11	05-Nov	2020	23/11/2020	NA	30	197	197	0		NA	NA	159	5	0	ANAC060 S_012554C_3_8_0	0
ANAC060 S_012554C	3	Col-0	0	8	5	11	05-Nov	2020	23/11/2020	NA	30	197	197	0		NA	NA	159	6	0	ANAC060 S_012554C_3_8_0	0
ANAC060 S_012554C	3	Col-0	0	8	5	11	05-Nov	2020	23/11/2020	NA	30	197	197	0		NA	NA	159	7	0	ANAC060 S_012554C_3_8_0	0
ANAC060 S_012554C	3	Col-0	0	8	5	11	05-Nov	2020	23/11/2020	NA	30	197	197	0		NA	NA	159	8	0	ANAC060 S_012554C_3_8_0	0
ANAC060 S_012554C	3	Col-0	0	8	5	11	05-Nov	2020	23/11/2020	NA	30	197	197	0		NA	NA	159	9	0	ANAC060 S_012554C_3_8_0	0
ANAC060 S_012554C	3	Col-0	0	8	5	11	05-Nov	2020	23/11/2020	NA	30	197	197	0		NA	NA	159	10	0	ANAC060 S_012554C_3_8_0	0
ANAC060 S_012554C	3	Col-0	0	8	5	11	05-Nov	2020	23/11/2020	NA	30	197	197	0		NA	NA	159	11	0	ANAC060 S_012554C_3_8_0	0
ANAC060 S_012554C	3	Col-0	0	8	5	11	05-Nov	2020	23/11/2020	NA	30	197	197	0		NA	NA	159	12	0	ANAC060 S_012554C_3_8_0	0
ANAC060 S_012554C	3	Col-0	0	8	5	11	05-Nov	2020	23/11/2020	NA	30	197	197	0		NA	NA	159	13	0	ANAC060 S_012554C_3_8_0	0
ANAC060 S_012554C	3	Col-0	0	8	5	11	05-Nov	2020	23/11/2020	NA	30	197	197	0		NA	NA	159	14	0	ANAC060 S_012554C_3_8_0	0
ANAC060 S_012554C	3	Col-0	0	8	5	11	05-Nov	2020	23/11/2020	NA	30	197	197	0		NA	NA	159	15	0	ANAC060 S_012554C_3_8_0	0
ANAC060 S_012554C	3	Col-0	0	8	5	11	05-Nov	2020	23/11/2020	NA	30	197	197	0		NA	NA	159	16	0	ANAC060 S_012554C_3_8_0	0
ANAC060 S_012554C	3	Col-0	0	8	5	11	05-Nov	2020	23/11/2020	NA	30	197	197	0		NA	NA	159	17	0	ANAC060 S_012554C_3_8_0	0
ANAC060 S_012554C	3	Col-0	0	8	5	11	05-Nov	2020	23/11/2020	NA	30	197	197	0		NA	NA	159	18	0	ANAC060 S_012554C_3_8_0	0
ANAC060 S_012554C	3	Col-0	1	8	5	11	05-Nov	2020	23/11/2020	NA	30	206	207	1		NA	NA	162	1	0	ANAC060 S_012554C_3_8_1	0
ANAC060 S_012554C	3	Col-0	1	8	5	11	05-Nov	2020	23/11/2020	NA	30	206	207	1		NA	NA	162	2	1	ANAC060 S_012554C_3_8_1	0.483091787
ANAC060 S_012554C	3	Col-0	1	8	5	11	05-Nov	2020	23/11/2020	NA	30	206	207	1		NA	NA	162	3	54	ANAC060 S_012554C_3_8_1	26.08695652
ANAC060 S_012554C	3	Col-0	1	8	5	11	05-Nov	2020	23/11/2020	NA	30	206	207	1		NA	NA	162	4	114	ANAC060 S_012554C_3_8_1	55.07246377
ANAC060 S_012554C	3	Col-0	1	8	5	11	05-Nov	2020	23/11/2020	NA	30	206	207	1		NA	NA	162	5	24	ANAC060 S_012554C_3_8_1	11.5942029
ANAC060 S_012554C	3	Col-0	1	8	5	11	05-Nov	2020	23/11/2020	NA	30	206	207	1		NA	NA	162	6	5	ANAC060 S_012554C_3_8_1	2.415458937
ANAC060 S_012554C	3	Col-0	1	8	5	11	05-Nov	2020	23/11/2020	NA	30	206	207	1		NA	NA	162	7	4	ANAC060 S_012554C_3_8_1	1.93236715
ANAC060 S_012554C	3	Col-0	1	8	5	11	05-Nov	2020	23/11/2020	NA	30	206	207	1		NA	NA	162	8	1	ANAC060 S_012554C_3_8_1	0.483091787
ANAC060 S_012554C	3	Col-0	1	8	5	11	05-Nov	2020	23/11/2020	NA	30	206	207	1		NA	NA	162	9	0	ANAC060 S_012554C_3_8_1	0
ANAC060 S_012554C	3	Col-0	1	8	5	11	05-Nov	2020	23/11/2020	NA	30	206	207	1		NA	NA	162	10	0	ANAC060 S_012554C_3_8_1	0
ANAC060 S_012554C	3	Col-0	1	8	5	11	05-Nov	2020	23/11/2020	NA	30	206	207	1		NA	NA	162	11	0	ANAC060 S_012554C_3_8_1	0
ANAC060 S_012554C	3	Col-0	1	8	5	11	05-Nov	2020	23/11/2020	NA	30	206	207	1		NA	NA	162	12	0	ANAC060 S_012554C_3_8_1	0
ANAC060 S_012554C	3	Col-0	1	8	5	11	05-Nov	2020	23/11/2020	NA	30	206	207	1		NA	NA	162	13	1	ANAC060 S_012554C_3_8_1	0.483091787
ANAC060 S_012554C	3	Col-0	1	8	5	11	05-Nov	2020	23/11/2020	NA	30	206	207	1		NA	NA	162	14	1	ANAC060 S_012554C_3_8_1	0.483091787
ANAC060 S_012554C	3	Col-0	1	8	5	11	05-Nov	2020	23/11/2020	NA	30	206	207	1		NA	NA	162	15	0	ANAC060 S_012554C_3_8_1	0
ANAC060 S_012554C	3	Col-0	1	8	5	11	05-Nov	2020	23/11/2020	NA	30	206	207	1		NA	NA	162	16	1	ANAC060 S_012554C_3_8_1	0.483091787
ANAC060 S_012554C	3	Col-0	1	8	5	11	05-Nov	2020	23/11/2020	NA	30	206	207	1		NA	NA	162	17	0	ANAC060 S_012554C_3_8_1	0
ANAC060 S_012554C	3	Col-0	1	8	5	11	05-Nov	2020	23/11/2020	NA	30	206	207	1		NA	NA	162	18	0	ANAC060 S_012554C_3_8_1	0
ANAC060 S_012554C	3	Col-0	5	8	5	11	05-Nov	2020	23/11/2020	NA	30	11	197	186		NA	NA	165	1	0	ANAC060 S_012554C_3_8_5	0
ANAC060 S_012554C	3	Col-0	5	8	5	11	05-Nov	2020	23/11/2020	NA	30	11	197	186		NA	NA	165	2	0	ANAC060 S_012554C_3_8_5	0
ANAC060 S_012554C	3	Col-0	5	8	5	11	05-Nov	2020	23/11/2020	NA	30	11	197	186		NA	NA	165	3	0	ANAC060 S_012554C_3_8_5	0
ANAC060 S_012554C	3	Col-0	5	8	5	11	05-Nov	2020	23/11/2020	NA	30	11	197	186		NA	NA	165	4	1	ANAC060 S_012554C_3_8_5	0.507614213
ANAC060 S_012554C	3	Col-0	5	8	5	11	05-Nov	2020	23/11/2020	NA	30	11	197	186		NA	NA	165	5	2	ANAC060 S_012554C_3_8_5	1.015228426
ANAC060 S_012554C	3	Col-0	5	8	5	11	05-Nov	2020	23/11/2020	NA	30	11	197	186		NA	NA	165	6	1	ANAC060 S_012554C_3_8_5	0.507614213
ANAC060 S_012554C	3	Col-0	5	8	5	11	05-Nov	2020	23/11/2020	NA	30	11	197	186		NA	NA	165	7	2	ANAC060 S_012554C_3_8_5	1.015228426
ANAC060 S_012554C	3	Col-0	5	8	5	11	05-Nov	2020	23/11/2020	NA	30	11	197	186		NA	NA	165	8	0	ANAC060 S_012554C_3_8_5	0
ANAC060 S_012554C	3	Col-0	5	8	5	11	05-Nov	2020	23/11/2020	NA	30	11	197	186		NA	NA	165	9	2	ANAC060 S_012554C_3_8_5	1.015228426
ANAC060 S_012554C	3	Col-0	5	8	5	11	05-Nov	2020	23/11/2020	NA	30	11	197	186		NA	NA	165	10	0	ANAC060 S_012554C_3_8_5	0
ANAC060 S_012554C	3	Col-0	5	8	5	11	05-Nov	2020	23/11/2020	NA	30	11	197	186		NA	NA	165	11	0	ANAC060 S_012554C_3_8_5	0
ANAC060 S_012554C	3	Col-0	5	8	5	11	05-Nov	2020	23/11/2020	NA	30	11	197	186		NA	NA	165	12	0	ANAC060 S_012554C_3_8_5	0
ANAC060 S_012554C	3	Col-0	5	8	5	11	05-Nov	2020	23/11/2020	NA	30	11	197	186		NA	NA	165	13	0	ANAC060 S_012554C_3_8_5	0
ANAC060 S_012554C	3	Col-0	5	8	5	11	05-Nov	2020	23/11/2020	NA	30	11	197	186		NA	NA	165	14	1	ANAC060 S_012554C_3_8_5	0.507614213
ANAC060 S_012554C	3	Col-0	5	8	5	11	05-Nov	2020	23/11/2020	NA	30	11	197	186		NA	NA	165	15	1	ANAC060 S_012554C_3_8_5	0.507614213
ANAC060 S_012554C	3	Col-0	5	8	5	11	05-Nov	2020	23/11/2020	NA	30	11	197	186		NA	NA	165	16	1	ANAC060 S_012554C_3_8_5	0.507614213
ANAC060 S_012554C	3	Col-0	5	8	5	11	05-Nov	2020	23/11/2020	NA	30	11	197	186		NA	NA	165	17	0	ANAC060 S_012554C_3_8_5	0
ANAC060 S_012554C	3	Col-0	5	8	5	11	05-Nov	2020	23/11/2020	NA	30	11	197	186		NA	NA	165	18	0	ANAC060 S_012554C_3_8_5	0
ANAC060 S_012554C	3	Col-0	10	8	5	11	05-Nov	2020	23/11/2020	NA	30	0	195	195		NA	NA	168	1	0	ANAC060 S_012554C_3_8_10	0
ANAC060 S_012554C	3	Col-0	10	8	5	11	05-Nov	2020	23/11/2020	NA	30	0	195	195		NA	NA	168	2	0	ANAC060 S_012554C_3_8_10	0
ANAC060 S_012554C	3	Col-0	10	8	5	11	05-Nov	2020	23/11/2020	NA	30	0	195	195		NA	NA	168	3	0	ANAC060 S_012554C_3_8_10	0
ANAC060 S_012554C	3	Col-0	10	8	5	11	05-Nov	2020	23/11/2020	NA	30	0	195	195		NA	NA	168	4	0	ANAC060 S_012554C_3_8_10	0
ANAC060 S_012554C	3	Col-0	10	8	5	11	05-Nov	2020	23/11/2020	NA	30	0	195	195		NA	NA	168	5	0	ANAC060 S_012554C_3_8_10	0
ANAC060 S_012554C	3	Col-0	10	8	5	11	05-Nov	2020	23/11/2020	NA	30	0	195	195		NA	NA	168	6	0	ANAC060 S_012554C_3_8_10	0
ANAC060 S_012554C	3	Col-0	10	8	5	11	05-Nov	2020	23/11/2020	NA	30	0	195	195		NA	NA	168	7	0	ANAC060 S_012554C_3_8_10	0
ANAC060 S_012554C	3	Col-0	10	8	5	11	05-Nov	2020	23/11/2020	NA	30	0	195	195		NA	NA	168	8	0	ANAC060 S_012554C_3_8_10	0
ANAC060 S_012554C	3	Col-0	10	8	5	11	05-Nov	2020	23/11/2020	NA	30	0	195	195		NA	NA	168	9	0	ANAC060 S_012554C_3_8_10	0
ANAC060 S_012554C	3	Col-0	10	8	5	11	05-Nov	2020	23/11/2020	NA	30	0	195	195		NA	NA	168	10	0	ANAC060 S_012554C_3_8_10	0
ANAC060 S_012554C	3	Col-0	10	8	5	11	05-Nov	2020	23/11/2020	NA	30	0	195	195		NA	NA	168	11	0	ANAC060 S_012554C_3_8_10	0
ANAC060 S_012554C	3	Col-0	10	8	5	11	05-Nov	2020	23/11/2020	NA	30	0	195	195		NA	NA	168	12	0	ANAC060 S_012554C_3_8_10	0
ANAC060 S_012554C	3	Col-0	10	8	5	11	05-Nov	2020	23/11/2020	NA	30	0	195	195		NA	NA	168	13	0	ANAC060 S_012554C_3_8_10	0
ANAC060 S_012554C	3	Col-0	10	8	5	11	05-Nov	2020	23/11/2020	NA	30	0	195	195		NA	NA	168	14	0	ANAC060 S_012554C_3_8_10	0
ANAC060 S_012554C	3	Col-0	10	8	5	11	05-Nov	2020	23/11/2020	NA	30	0	195	195		NA	NA	168	15	0	ANAC060 S_012554C_3_8_10	0
ANAC060 S_012554C	3	Col-0	10	8	5	11	05-Nov	2020	23/11/2020	NA	30	0	195	195		NA	NA	168	16	0	ANAC060 S_012554C_3_8_10	0
ANAC060 S_012554C	3	Col-0	10	8	5	11	05-Nov	2020	23/11/2020	NA	30	0	195	195		NA	NA	168	17	0	ANAC060 S_012554C_3_8_10	0
ANAC060 S_012554C	3	Col-0	10	8	5	11	05-Nov	2020	23/11/2020	NA	30	0	195	195		NA	NA	168	18	0	ANAC060 S_012554C_3_8_10	0
ANAC060 S_012554C	4	Col-0	0	2	NA	NA	05-Dec	2017	19-Dec	NA	1	53	106	53		NA	NA	15	1	0	ANAC060 S_012554C_4_2_0	0
ANAC060 S_012554C	4	Col-0	0	2	NA	NA	05-Dec	2017	19-Dec	NA	1	53	106	53		NA	NA	15	2	0	ANAC060 S_012554C_4_2_0	0
ANAC060 S_012554C	4	Col-0	0	2	NA	NA	05-Dec	2017	19-Dec	NA	1	53	106	53		NA	NA	15	3	3	ANAC060 S_012554C_4_2_0	2.830188679
ANAC060 S_012554C	4	Col-0	0	2	NA	NA	05-Dec	2017	19-Dec	NA	1	53	106	53		NA	NA	15	4	33	ANAC060 S_012554C_4_2_0	31.13207547
ANAC060 S_012554C	4	Col-0	0	2	NA	NA	05-Dec	2017	19-Dec	NA	1	53	106	53		NA	NA	15	5	2	ANAC060 S_012554C_4_2_0	1.886792453
ANAC060 S_012554C	4	Col-0	0	2	NA	NA	05-Dec	2017	19-Dec	NA	1	53	106	53		NA	NA	15	6	7	ANAC060 S_012554C_4_2_0	6.603773585
ANAC060 S_012554C	4	Col-0	0	2	NA	NA	05-Dec	2017	19-Dec	NA	1	53	106	53		NA	NA	15	7	4	ANAC060 S_012554C_4_2_0	3.773584906
ANAC060 S_012554C	4	Col-0	0	2	NA	NA	05-Dec	2017	19-Dec	NA	1	53	106	53		NA	NA	15	8	2	ANAC060 S_012554C_4_2_0	1.886792453
ANAC060 S_012554C	4	Col-0	0	2	NA	NA	05-Dec	2017	19-Dec	NA	1	53	106	53		NA	NA	15	9	1	ANAC060 S_012554C_4_2_0	0.943396226
ANAC060 S_012554C	4	Col-0	0	2	NA	NA	05-Dec	2017	19-Dec	NA	1	53	106	53		NA	NA	15	10	1	ANAC060 S_012554C_4_2_0	0.943396226
ANAC060 S_012554C	4	Col-0	0	2	NA	NA	05-Dec	2017	19-Dec	NA	1	53	106	53		NA	NA	15	11	0	ANAC060 S_012554C_4_2_0	0
ANAC060 S_012554C	4	Col-0	0	2	NA	NA	05-Dec	2017	19-Dec	NA	1	53	106	53		NA	NA	15	12	0	ANAC060 S_012554C_4_2_0	0
ANAC060 S_012554C	4	Col-0	0	2	NA	NA	05-Dec	2017	19-Dec	NA	1	53	106	53		NA	NA	15	13	0	ANAC060 S_012554C_4_2_0	0
ANAC060 S_012554C	4	Col-0	0	2	NA	NA	05-Dec	2017	19-Dec	NA	1	53	106	53		NA	NA	15	14	0	ANAC060 S_012554C_4_2_0	0
ANAC060 S_012554C	4	Col-0	0	2	NA	NA	05-Dec	2017	19-Dec	NA	1	53	106	53		NA	NA	15	15	0	ANAC060 S_012554C_4_2_0	0
ANAC060 S_012554C	4	Col-0	0	2	NA	NA	05-Dec	2017	19-Dec	NA	1	53	106	53		NA	NA	15	16	0	ANAC060 S_012554C_4_2_0	0
ANAC060 S_012554C	4	Col-0	0	2	NA	NA	05-Dec	2017	19-Dec	NA	1	53	106	53		NA	NA	15	17	0	ANAC060 S_012554C_4_2_0	0
ANAC060 S_012554C	4	Col-0	0	2	NA	NA	05-Dec	2017	19-Dec	NA	1	53	106	53		NA	NA	15	18	0	ANAC060 S_012554C_4_2_0	0
ANAC060 S_012554C	4	Col-0	5	2	NA	NA	05-Dec	2017	19-Dec	NA	1	17	120	103		NA	NA	16	1	0	ANAC060 S_012554C_4_2_5	0
ANAC060 S_012554C	4	Col-0	5	2	NA	NA	05-Dec	2017	19-Dec	NA	1	17	120	103		NA	NA	16	2	0	ANAC060 S_012554C_4_2_5	0
ANAC060 S_012554C	4	Col-0	5	2	NA	NA	05-Dec	2017	19-Dec	NA	1	17	120	103		NA	NA	16	3	0	ANAC060 S_012554C_4_2_5	0
ANAC060 S_012554C	4	Col-0	5	2	NA	NA	05-Dec	2017	19-Dec	NA	1	17	120	103		NA	NA	16	4	0	ANAC060 S_012554C_4_2_5	0
ANAC060 S_012554C	4	Col-0	5	2	NA	NA	05-Dec	2017	19-Dec	NA	1	17	120	103		NA	NA	16	5	0	ANAC060 S_012554C_4_2_5	0
ANAC060 S_012554C	4	Col-0	5	2	NA	NA	05-Dec	2017	19-Dec	NA	1	17	120	103		NA	NA	16	6	0	ANAC060 S_012554C_4_2_5	0
ANAC060 S_012554C	4	Col-0	5	2	NA	NA	05-Dec	2017	19-Dec	NA	1	17	120	103		NA	NA	16	7	9	ANAC060 S_012554C_4_2_5	7.5
ANAC060 S_012554C	4	Col-0	5	2	NA	NA	05-Dec	2017	19-Dec	NA	1	17	120	103		NA	NA	16	8	2	ANAC060 S_012554C_4_2_5	1.666666667
ANAC060 S_012554C	4	Col-0	5	2	NA	NA	05-Dec	2017	19-Dec	NA	1	17	120	103		NA	NA	16	9	3	ANAC060 S_012554C_4_2_5	2.5
ANAC060 S_012554C	4	Col-0	5	2	NA	NA	05-Dec	2017	19-Dec	NA	1	17	120	103		NA	NA	16	10	1	ANAC060 S_012554C_4_2_5	0.833333333
ANAC060 S_012554C	4	Col-0	5	2	NA	NA	05-Dec	2017	19-Dec	NA	1	17	120	103		NA	NA	16	11	2	ANAC060 S_012554C_4_2_5	1.666666667
ANAC060 S_012554C	4	Col-0	5	2	NA	NA	05-Dec	2017	19-Dec	NA	1	17	120	103		NA	NA	16	12	0	ANAC060 S_012554C_4_2_5	0
ANAC060 S_012554C	4	Col-0	5	2	NA	NA	05-Dec	2017	19-Dec	NA	1	17	120	103		NA	NA	16	13	0	ANAC060 S_012554C_4_2_5	0
ANAC060 S_012554C	4	Col-0	5	2	NA	NA	05-Dec	2017	19-Dec	NA	1	17	120	103		NA	NA	16	14	0	ANAC060 S_012554C_4_2_5	0
ANAC060 S_012554C	4	Col-0	5	2	NA	NA	05-Dec	2017	19-Dec	NA	1	17	120	103		NA	NA	16	15	0	ANAC060 S_012554C_4_2_5	0
ANAC060 S_012554C	4	Col-0	5	2	NA	NA	05-Dec	2017	19-Dec	NA	1	17	120	103		NA	NA	16	16	0	ANAC060 S_012554C_4_2_5	0
ANAC060 S_012554C	4	Col-0	5	2	NA	NA	05-Dec	2017	19-Dec	NA	1	17	120	103		NA	NA	16	17	0	ANAC060 S_012554C_4_2_5	0
ANAC060 S_012554C	4	Col-0	5	2	NA	NA	05-Dec	2017	19-Dec	NA	1	17	120	103		NA	NA	16	18	0	ANAC060 S_012554C_4_2_5	0
ANAC060 S_012554C	6	Col-0	0	2	NA	NA	05-Dec	2017	19-Dec	NA	1	78	103	25		NA	NA	17	1	0	ANAC060 S_012554C_6_2_0	0
ANAC060 S_012554C	6	Col-0	0	2	NA	NA	05-Dec	2017	19-Dec	NA	1	78	103	25		NA	NA	17	2	0	ANAC060 S_012554C_6_2_0	0
ANAC060 S_012554C	6	Col-0	0	2	NA	NA	05-Dec	2017	19-Dec	NA	1	78	103	25		NA	NA	17	3	6	ANAC060 S_012554C_6_2_0	5.825242718
ANAC060 S_012554C	6	Col-0	0	2	NA	NA	05-Dec	2017	19-Dec	NA	1	78	103	25		NA	NA	17	4	50	ANAC060 S_012554C_6_2_0	48.54368932
ANAC060 S_012554C	6	Col-0	0	2	NA	NA	05-Dec	2017	19-Dec	NA	1	78	103	25		NA	NA	17	5	3	ANAC060 S_012554C_6_2_0	2.912621359
ANAC060 S_012554C	6	Col-0	0	2	NA	NA	05-Dec	2017	19-Dec	NA	1	78	103	25		NA	NA	17	6	12	ANAC060 S_012554C_6_2_0	11.65048544
ANAC060 S_012554C	6	Col-0	0	2	NA	NA	05-Dec	2017	19-Dec	NA	1	78	103	25		NA	NA	17	7	2	ANAC060 S_012554C_6_2_0	1.941747573
ANAC060 S_012554C	6	Col-0	0	2	NA	NA	05-Dec	2017	19-Dec	NA	1	78	103	25		NA	NA	17	8	2	ANAC060 S_012554C_6_2_0	1.941747573
ANAC060 S_012554C	6	Col-0	0	2	NA	NA	05-Dec	2017	19-Dec	NA	1	78	103	25		NA	NA	17	9	0	ANAC060 S_012554C_6_2_0	0
ANAC060 S_012554C	6	Col-0	0	2	NA	NA	05-Dec	2017	19-Dec	NA	1	78	103	25		NA	NA	17	10	3	ANAC060 S_012554C_6_2_0	2.912621359
ANAC060 S_012554C	6	Col-0	0	2	NA	NA	05-Dec	2017	19-Dec	NA	1	78	103	25		NA	NA	17	11	0	ANAC060 S_012554C_6_2_0	0
ANAC060 S_012554C	6	Col-0	0	2	NA	NA	05-Dec	2017	19-Dec	NA	1	78	103	25		NA	NA	17	12	0	ANAC060 S_012554C_6_2_0	0
ANAC060 S_012554C	6	Col-0	0	2	NA	NA	05-Dec	2017	19-Dec	NA	1	78	103	25		NA	NA	17	13	0	ANAC060 S_012554C_6_2_0	0
ANAC060 S_012554C	6	Col-0	0	2	NA	NA	05-Dec	2017	19-Dec	NA	1	78	103	25		NA	NA	17	14	0	ANAC060 S_012554C_6_2_0	0
ANAC060 S_012554C	6	Col-0	0	2	NA	NA	05-Dec	2017	19-Dec	NA	1	78	103	25		NA	NA	17	15	0	ANAC060 S_012554C_6_2_0	0
ANAC060 S_012554C	6	Col-0	0	2	NA	NA	05-Dec	2017	19-Dec	NA	1	78	103	25		NA	NA	17	16	0	ANAC060 S_012554C_6_2_0	0
ANAC060 S_012554C	6	Col-0	0	2	NA	NA	05-Dec	2017	19-Dec	NA	1	78	103	25		NA	NA	17	17	0	ANAC060 S_012554C_6_2_0	0
ANAC060 S_012554C	6	Col-0	0	2	NA	NA	05-Dec	2017	19-Dec	NA	1	78	103	25		NA	NA	17	18	0	ANAC060 S_012554C_6_2_0	0
ANAC060 S_012554C	6	Col-0	5	2	NA	NA	05-Dec	2017	19-Dec	NA	1	39	113	74		NA	NA	18	1	0	ANAC060 S_012554C_6_2_5	0
ANAC060 S_012554C	6	Col-0	5	2	NA	NA	05-Dec	2017	19-Dec	NA	1	39	113	74		NA	NA	18	2	0	ANAC060 S_012554C_6_2_5	0
ANAC060 S_012554C	6	Col-0	5	2	NA	NA	05-Dec	2017	19-Dec	NA	1	39	113	74		NA	NA	18	3	0	ANAC060 S_012554C_6_2_5	0
ANAC060 S_012554C	6	Col-0	5	2	NA	NA	05-Dec	2017	19-Dec	NA	1	39	113	74		NA	NA	18	4	1	ANAC060 S_012554C_6_2_5	0.884955752
ANAC060 S_012554C	6	Col-0	5	2	NA	NA	05-Dec	2017	19-Dec	NA	1	39	113	74		NA	NA	18	5	0	ANAC060 S_012554C_6_2_5	0
ANAC060 S_012554C	6	Col-0	5	2	NA	NA	05-Dec	2017	19-Dec	NA	1	39	113	74		NA	NA	18	6	0	ANAC060 S_012554C_6_2_5	0
ANAC060 S_012554C	6	Col-0	5	2	NA	NA	05-Dec	2017	19-Dec	NA	1	39	113	74		NA	NA	18	7	27	ANAC060 S_012554C_6_2_5	23.89380531
ANAC060 S_012554C	6	Col-0	5	2	NA	NA	05-Dec	2017	19-Dec	NA	1	39	113	74		NA	NA	18	8	6	ANAC060 S_012554C_6_2_5	5.309734513
ANAC060 S_012554C	6	Col-0	5	2	NA	NA	05-Dec	2017	19-Dec	NA	1	39	113	74		NA	NA	18	9	1	ANAC060 S_012554C_6_2_5	0.884955752
ANAC060 S_012554C	6	Col-0	5	2	NA	NA	05-Dec	2017	19-Dec	NA	1	39	113	74		NA	NA	18	10	2	ANAC060 S_012554C_6_2_5	1.769911504
ANAC060 S_012554C	6	Col-0	5	2	NA	NA	05-Dec	2017	19-Dec	NA	1	39	113	74		NA	NA	18	11	0	ANAC060 S_012554C_6_2_5	0
ANAC060 S_012554C	6	Col-0	5	2	NA	NA	05-Dec	2017	19-Dec	NA	1	39	113	74		NA	NA	18	12	0	ANAC060 S_012554C_6_2_5	0
ANAC060 S_012554C	6	Col-0	5	2	NA	NA	05-Dec	2017	19-Dec	NA	1	39	113	74		NA	NA	18	13	0	ANAC060 S_012554C_6_2_5	0
ANAC060 S_012554C	6	Col-0	5	2	NA	NA	05-Dec	2017	19-Dec	NA	1	39	113	74		NA	NA	18	14	1	ANAC060 S_012554C_6_2_5	0.884955752
ANAC060 S_012554C	6	Col-0	5	2	NA	NA	05-Dec	2017	19-Dec	NA	1	39	113	74		NA	NA	18	15	1	ANAC060 S_012554C_6_2_5	0.884955752
ANAC060 S_012554C	6	Col-0	5	2	NA	NA	05-Dec	2017	19-Dec	NA	1	39	113	74		NA	NA	18	16	0	ANAC060 S_012554C_6_2_5	0
ANAC060 S_012554C	6	Col-0	5	2	NA	NA	05-Dec	2017	19-Dec	NA	1	39	113	74		NA	NA	18	17	0	ANAC060 S_012554C_6_2_5	0
ANAC060 S_012554C	6	Col-0	5	2	NA	NA	05-Dec	2017	19-Dec	NA	1	39	113	74		NA	NA	18	18	0	ANAC060 S_012554C_6_2_5	0
Col	1	Col-0	0	1	NA	NA	11-Oct	2017	25/11/2017	NA	10	143	143	0		NA	NA	1	1	0	Col_1_1_0	0
Col	1	Col-0	0	1	NA	NA	11-Oct	2017	25/11/2017	NA	10	143	143	0		NA	NA	1	2	3	Col_1_1_0	2.097902098
Col	1	Col-0	0	1	NA	NA	11-Oct	2017	25/11/2017	NA	10	143	143	0		NA	NA	1	3	140	Col_1_1_0	97.9020979
Col	1	Col-0	0	1	NA	NA	11-Oct	2017	25/11/2017	NA	10	143	143	0		NA	NA	1	4	0	Col_1_1_0	0
Col	1	Col-0	0	1	NA	NA	11-Oct	2017	25/11/2017	NA	10	143	143	0		NA	NA	1	5	0	Col_1_1_0	0
Col	1	Col-0	0	1	NA	NA	11-Oct	2017	25/11/2017	NA	10	143	143	0		NA	NA	1	6	0	Col_1_1_0	0
Col	1	Col-0	0	1	NA	NA	11-Oct	2017	25/11/2017	NA	10	143	143	0		NA	NA	1	7	0	Col_1_1_0	0
Col	1	Col-0	0	1	NA	NA	11-Oct	2017	25/11/2017	NA	10	143	143	0		NA	NA	1	8	0	Col_1_1_0	0
Col	1	Col-0	5	1	NA	NA	11-Oct	2017	25/11/2017	NA	10	32	117	85	none green, some of these germinated after scoring period	NA	NA	2	1	0	Col_1_1_5	0
Col	1	Col-0	5	1	NA	NA	11-Oct	2017	25/11/2017	NA	10	32	117	85	none green, some of these germinated after scoring period	NA	NA	2	2	3	Col_1_1_5	2.564102564
Col	1	Col-0	5	1	NA	NA	11-Oct	2017	25/11/2017	NA	10	32	117	85	none green, some of these germinated after scoring period	NA	NA	2	3	2	Col_1_1_5	1.709401709
Col	1	Col-0	5	1	NA	NA	11-Oct	2017	25/11/2017	NA	10	32	117	85	none green, some of these germinated after scoring period	NA	NA	2	4	5	Col_1_1_5	4.273504274
Col	1	Col-0	5	1	NA	NA	11-Oct	2017	25/11/2017	NA	10	32	117	85	none green, some of these germinated after scoring period	NA	NA	2	5	3	Col_1_1_5	2.564102564
Col	1	Col-0	5	1	NA	NA	11-Oct	2017	25/11/2017	NA	10	32	117	85	none green, some of these germinated after scoring period	NA	NA	2	6	2	Col_1_1_5	1.709401709
Col	1	Col-0	5	1	NA	NA	11-Oct	2017	25/11/2017	NA	10	32	117	85	none green, some of these germinated after scoring period	NA	NA	2	7	3	Col_1_1_5	2.564102564
Col	1	Col-0	5	1	NA	NA	11-Oct	2017	25/11/2017	NA	10	32	117	85	none green, some of these germinated after scoring period	NA	NA	2	8	3	Col_1_1_5	2.564102564
Col	1	Col-0	5	1	NA	NA	11-Oct	2017	25/11/2017	NA	10	32	117	85	none green, some of these germinated after scoring period	NA	NA	2	9	1	Col_1_1_5	0.854700855
Col	1	Col-0	5	1	NA	NA	11-Oct	2017	25/11/2017	NA	10	32	117	85	none green, some of these germinated after scoring period	NA	NA	2	10	0	Col_1_1_5	0
Col	1	Col-0	5	1	NA	NA	11-Oct	2017	25/11/2017	NA	10	32	117	85	none green, some of these germinated after scoring period	NA	NA	2	11	4	Col_1_1_5	3.418803419
Col	1	Col-0	5	1	NA	NA	11-Oct	2017	25/11/2017	NA	10	32	117	85	none green, some of these germinated after scoring period	NA	NA	2	12	3	Col_1_1_5	2.564102564
Col	1	Col-0	5	1	NA	NA	11-Oct	2017	25/11/2017	NA	10	32	117	85	none green, some of these germinated after scoring period	NA	NA	2	13	1	Col_1_1_5	0.854700855
Col	1	Col-0	5	1	NA	NA	11-Oct	2017	25/11/2017	NA	10	32	117	85	none green, some of these germinated after scoring period	NA	NA	2	14	2	Col_1_1_5	1.709401709
Col	1	Col-0	0	3	NA	NA	30-Jan	2018	28-Feb	NA	1	136	136	0		NA	NA	39	1	0	Col_1_3_0	0
Col	1	Col-0	0	3	NA	NA	30-Jan	2018	28-Feb	NA	1	136	136	0		NA	NA	39	2	16	Col_1_3_0	11.76470588
Col	1	Col-0	0	3	NA	NA	30-Jan	2018	28-Feb	NA	1	136	136	0		NA	NA	39	3	102	Col_1_3_0	75
Col	1	Col-0	0	3	NA	NA	30-Jan	2018	28-Feb	NA	1	136	136	0		NA	NA	39	4	10	Col_1_3_0	7.352941176
Col	1	Col-0	0	3	NA	NA	30-Jan	2018	28-Feb	NA	1	136	136	0		NA	NA	39	5	7	Col_1_3_0	5.147058824
Col	1	Col-0	0	3	NA	NA	30-Jan	2018	28-Feb	NA	1	136	136	0		NA	NA	39	6	1	Col_1_3_0	0.735294118
Col	1	Col-0	0	3	NA	NA	30-Jan	2018	28-Feb	NA	1	136	136	0		NA	NA	39	7	0	Col_1_3_0	0
Col	1	Col-0	0	3	NA	NA	30-Jan	2018	28-Feb	NA	1	136	136	0		NA	NA	39	8	0	Col_1_3_0	0
Col	1	Col-0	0	3	NA	NA	30-Jan	2018	28-Feb	NA	1	136	136	0		NA	NA	39	9	0	Col_1_3_0	0
Col	1	Col-0	0	3	NA	NA	30-Jan	2018	28-Feb	NA	1	136	136	0		NA	NA	39	10	0	Col_1_3_0	0
Col	1	Col-0	0	4	NA	NA	26-Feb	2018	08-Mar	NA	7	163	163	0		NA	NA	42	1	0	Col_1_4_0	0
Col	1	Col-0	0	4	NA	NA	26-Feb	2018	08-Mar	NA	7	163	163	0		NA	NA	42	2	0	Col_1_4_0	0
Col	1	Col-0	0	4	NA	NA	26-Feb	2018	08-Mar	NA	7	163	163	0		NA	NA	42	3	162	Col_1_4_0	99.38650307
Col	1	Col-0	0	4	NA	NA	26-Feb	2018	08-Mar	NA	7	163	163	0		NA	NA	42	4	1	Col_1_4_0	0.613496933
Col	1	Col-0	0	4	NA	NA	26-Feb	2018	08-Mar	NA	7	163	163	0		NA	NA	42	5	0	Col_1_4_0	0
Col	1	Col-0	0	4	NA	NA	26-Feb	2018	08-Mar	NA	7	163	163	0		NA	NA	42	6	0	Col_1_4_0	0
Col	1	Col-0	0	4	NA	NA	26-Feb	2018	08-Mar	NA	7	163	163	0		NA	NA	42	7	0	Col_1_4_0	0
Col	1	Col-0	0	4	NA	NA	26-Feb	2018	08-Mar	NA	7	163	163	0		NA	NA	42	8	0	Col_1_4_0	0
Col	1	Col-0	0	4	NA	NA	26-Feb	2018	08-Mar	NA	7	163	163	0		NA	NA	42	9	0	Col_1_4_0	0
Col	1	Col-0	0	4	NA	NA	26-Feb	2018	08-Mar	NA	7	163	163	0		NA	NA	42	10	0	Col_1_4_0	0
Col	1	Col-0	5	4	NA	NA	26-Feb	2018	08-Mar	NA	7	32	148	116	nealy all germ outside scoring period.None green	NA	NA	43	1	0	Col_1_4_5	0
Col	1	Col-0	5	4	NA	NA	26-Feb	2018	08-Mar	NA	7	32	148	116	nealy all germ outside scoring period.None green	NA	NA	43	2	0	Col_1_4_5	0
Col	1	Col-0	5	4	NA	NA	26-Feb	2018	08-Mar	NA	7	32	148	116	nealy all germ outside scoring period.None green	NA	NA	43	3	10	Col_1_4_5	6.756756757
Col	1	Col-0	5	4	NA	NA	26-Feb	2018	08-Mar	NA	7	32	148	116	nealy all germ outside scoring period.None green	NA	NA	43	4	8	Col_1_4_5	5.405405405
Col	1	Col-0	5	4	NA	NA	26-Feb	2018	08-Mar	NA	7	32	148	116	nealy all germ outside scoring period.None green	NA	NA	43	5	5	Col_1_4_5	3.378378378
Col	1	Col-0	5	4	NA	NA	26-Feb	2018	08-Mar	NA	7	32	148	116	nealy all germ outside scoring period.None green	NA	NA	43	6	4	Col_1_4_5	2.702702703
Col	1	Col-0	5	4	NA	NA	26-Feb	2018	08-Mar	NA	7	32	148	116	nealy all germ outside scoring period.None green	NA	NA	43	7	2	Col_1_4_5	1.351351351
Col	1	Col-0	5	4	NA	NA	26-Feb	2018	08-Mar	NA	7	32	148	116	nealy all germ outside scoring period.None green	NA	NA	43	8	1	Col_1_4_5	0.675675676
Col	1	Col-0	5	4	NA	NA	26-Feb	2018	08-Mar	NA	7	32	148	116	nealy all germ outside scoring period.None green	NA	NA	43	9	1	Col_1_4_5	0.675675676
Col	1	Col-0	5	4	NA	NA	26-Feb	2018	08-Mar	NA	7	32	148	116	nealy all germ outside scoring period.None green	NA	NA	43	10	1	Col_1_4_5	0.675675676
Col	1	Col-0	0	5	25	9	25-Sep	2020	14/10/2020	NA	2	176	176	0		NA	NA	69	1	0	Col_1_5_0	0
Col	1	Col-0	0	5	25	9	25-Sep	2020	14/10/2020	NA	2	176	176	0		NA	NA	69	2	13	Col_1_5_0	7.386363636
Col	1	Col-0	0	5	25	9	25-Sep	2020	14/10/2020	NA	2	176	176	0		NA	NA	69	3	130	Col_1_5_0	73.86363636
Col	1	Col-0	0	5	25	9	25-Sep	2020	14/10/2020	NA	2	176	176	0		NA	NA	69	4	5	Col_1_5_0	2.840909091
Col	1	Col-0	0	5	25	9	25-Sep	2020	14/10/2020	NA	2	176	176	0		NA	NA	69	5	19	Col_1_5_0	10.79545455
Col	1	Col-0	0	5	25	9	25-Sep	2020	14/10/2020	NA	2	176	176	0		NA	NA	69	6	5	Col_1_5_0	2.840909091
Col	1	Col-0	0	5	25	9	25-Sep	2020	14/10/2020	NA	2	176	176	0		NA	NA	69	7	3	Col_1_5_0	1.704545455
Col	1	Col-0	0	5	25	9	25-Sep	2020	14/10/2020	NA	2	176	176	0		NA	NA	69	8	0	Col_1_5_0	0
Col	1	Col-0	0	5	25	9	25-Sep	2020	14/10/2020	NA	2	176	176	0		NA	NA	69	9	1	Col_1_5_0	0.568181818
Col	1	Col-0	0	5	25	9	25-Sep	2020	14/10/2020	NA	2	176	176	0		NA	NA	69	10	0	Col_1_5_0	0
Col	1	Col-0	0	5	25	9	25-Sep	2020	14/10/2020	NA	2	176	176	0		NA	NA	69	11	0	Col_1_5_0	0
Col	1	Col-0	0	5	25	9	25-Sep	2020	14/10/2020	NA	2	176	176	0		NA	NA	69	12	0	Col_1_5_0	0
Col	1	Col-0	0	5	25	9	25-Sep	2020	14/10/2020	NA	2	176	176	0		NA	NA	69	13	0	Col_1_5_0	0
Col	1	Col-0	0	5	25	9	25-Sep	2020	14/10/2020	NA	2	176	176	0		NA	NA	69	14	0	Col_1_5_0	0
Col	1	Col-0	0	5	25	9	25-Sep	2020	14/10/2020	NA	2	176	176	0		NA	NA	69	15	0	Col_1_5_0	0
Col	1	Col-0	0	5	25	9	25-Sep	2020	14/10/2020	NA	2	176	176	0		NA	NA	69	16	0	Col_1_5_0	0
Col	1	Col-0	0	5	25	9	25-Sep	2020	14/10/2020	NA	2	176	176	0		NA	NA	69	17	0	Col_1_5_0	0
Col	1	Col-0	0	5	25	9	25-Sep	2020	14/10/2020	NA	2	176	176	0		NA	NA	69	18	0	Col_1_5_0	0
Col	1	Col-0	0	5	25	9	25-Sep	2020	14/10/2020	NA	2	176	176	0		NA	NA	69	19	0	Col_1_5_0	0
Col	1	Col-0	1	5	25	9	25-Sep	2020	14/10/2020	NA	2	174	178	4		NA	NA	72	1	0	Col_1_5_1	0
Col	1	Col-0	1	5	25	9	25-Sep	2020	14/10/2020	NA	2	174	178	4		NA	NA	72	2	2	Col_1_5_1	1.123595506
Col	1	Col-0	1	5	25	9	25-Sep	2020	14/10/2020	NA	2	174	178	4		NA	NA	72	3	107	Col_1_5_1	60.11235955
Col	1	Col-0	1	5	25	9	25-Sep	2020	14/10/2020	NA	2	174	178	4		NA	NA	72	4	34	Col_1_5_1	19.1011236
Col	1	Col-0	1	5	25	9	25-Sep	2020	14/10/2020	NA	2	174	178	4		NA	NA	72	5	7	Col_1_5_1	3.93258427
Col	1	Col-0	1	5	25	9	25-Sep	2020	14/10/2020	NA	2	174	178	4		NA	NA	72	6	8	Col_1_5_1	4.494382022
Col	1	Col-0	1	5	25	9	25-Sep	2020	14/10/2020	NA	2	174	178	4		NA	NA	72	7	7	Col_1_5_1	3.93258427
Col	1	Col-0	1	5	25	9	25-Sep	2020	14/10/2020	NA	2	174	178	4		NA	NA	72	8	2	Col_1_5_1	1.123595506
Col	1	Col-0	1	5	25	9	25-Sep	2020	14/10/2020	NA	2	174	178	4		NA	NA	72	9	2	Col_1_5_1	1.123595506
Col	1	Col-0	1	5	25	9	25-Sep	2020	14/10/2020	NA	2	174	178	4		NA	NA	72	10	2	Col_1_5_1	1.123595506
Col	1	Col-0	1	5	25	9	25-Sep	2020	14/10/2020	NA	2	174	178	4		NA	NA	72	11	1	Col_1_5_1	0.561797753
Col	1	Col-0	1	5	25	9	25-Sep	2020	14/10/2020	NA	2	174	178	4		NA	NA	72	12	1	Col_1_5_1	0.561797753
Col	1	Col-0	1	5	25	9	25-Sep	2020	14/10/2020	NA	2	174	178	4		NA	NA	72	13	0	Col_1_5_1	0
Col	1	Col-0	1	5	25	9	25-Sep	2020	14/10/2020	NA	2	174	178	4		NA	NA	72	14	0	Col_1_5_1	0
Col	1	Col-0	1	5	25	9	25-Sep	2020	14/10/2020	NA	2	174	178	4		NA	NA	72	15	1	Col_1_5_1	0.561797753
Col	1	Col-0	1	5	25	9	25-Sep	2020	14/10/2020	NA	2	174	178	4		NA	NA	72	16	0	Col_1_5_1	0
Col	1	Col-0	1	5	25	9	25-Sep	2020	14/10/2020	NA	2	174	178	4		NA	NA	72	17	0	Col_1_5_1	0
Col	1	Col-0	1	5	25	9	25-Sep	2020	14/10/2020	NA	2	174	178	4		NA	NA	72	18	0	Col_1_5_1	0
Col	1	Col-0	1	5	25	9	25-Sep	2020	14/10/2020	NA	2	174	178	4		NA	NA	72	19	0	Col_1_5_1	0
Col	1	Col-0	5	5	25	9	25-Sep	2020	14/10/2020	NA	2	99	156	57		NA	NA	75	1	0	Col_1_5_5	0
Col	1	Col-0	5	5	25	9	25-Sep	2020	14/10/2020	NA	2	99	156	57		NA	NA	75	2	0	Col_1_5_5	0
Col	1	Col-0	5	5	25	9	25-Sep	2020	14/10/2020	NA	2	99	156	57		NA	NA	75	3	3	Col_1_5_5	1.923076923
Col	1	Col-0	5	5	25	9	25-Sep	2020	14/10/2020	NA	2	99	156	57		NA	NA	75	4	21	Col_1_5_5	13.46153846
Col	1	Col-0	5	5	25	9	25-Sep	2020	14/10/2020	NA	2	99	156	57		NA	NA	75	5	23	Col_1_5_5	14.74358974
Col	1	Col-0	5	5	25	9	25-Sep	2020	14/10/2020	NA	2	99	156	57		NA	NA	75	6	9	Col_1_5_5	5.769230769
Col	1	Col-0	5	5	25	9	25-Sep	2020	14/10/2020	NA	2	99	156	57		NA	NA	75	7	5	Col_1_5_5	3.205128205
Col	1	Col-0	5	5	25	9	25-Sep	2020	14/10/2020	NA	2	99	156	57		NA	NA	75	8	4	Col_1_5_5	2.564102564
Col	1	Col-0	5	5	25	9	25-Sep	2020	14/10/2020	NA	2	99	156	57		NA	NA	75	9	4	Col_1_5_5	2.564102564
Col	1	Col-0	5	5	25	9	25-Sep	2020	14/10/2020	NA	2	99	156	57		NA	NA	75	10	8	Col_1_5_5	5.128205128
Col	1	Col-0	5	5	25	9	25-Sep	2020	14/10/2020	NA	2	99	156	57		NA	NA	75	11	0	Col_1_5_5	0
Col	1	Col-0	5	5	25	9	25-Sep	2020	14/10/2020	NA	2	99	156	57		NA	NA	75	12	4	Col_1_5_5	2.564102564
Col	1	Col-0	5	5	25	9	25-Sep	2020	14/10/2020	NA	2	99	156	57		NA	NA	75	13	2	Col_1_5_5	1.282051282
Col	1	Col-0	5	5	25	9	25-Sep	2020	14/10/2020	NA	2	99	156	57		NA	NA	75	14	4	Col_1_5_5	2.564102564
Col	1	Col-0	5	5	25	9	25-Sep	2020	14/10/2020	NA	2	99	156	57		NA	NA	75	15	0	Col_1_5_5	0
Col	1	Col-0	5	5	25	9	25-Sep	2020	14/10/2020	NA	2	99	156	57		NA	NA	75	16	6	Col_1_5_5	3.846153846
Col	1	Col-0	5	5	25	9	25-Sep	2020	14/10/2020	NA	2	99	156	57		NA	NA	75	17	2	Col_1_5_5	1.282051282
Col	1	Col-0	5	5	25	9	25-Sep	2020	14/10/2020	NA	2	99	156	57		NA	NA	75	18	1	Col_1_5_5	0.641025641
Col	1	Col-0	5	5	25	9	25-Sep	2020	14/10/2020	NA	2	99	156	57		NA	NA	75	19	3	Col_1_5_5	1.923076923
Col	1	Col-0	10	5	25	9	25-Sep	2020	14/10/2020	NA	2	9	173	164		NA	NA	78	1	0	Col_1_5_10	0
Col	1	Col-0	10	5	25	9	25-Sep	2020	14/10/2020	NA	2	9	173	164		NA	NA	78	2	0	Col_1_5_10	0
Col	1	Col-0	10	5	25	9	25-Sep	2020	14/10/2020	NA	2	9	173	164		NA	NA	78	3	0	Col_1_5_10	0
Col	1	Col-0	10	5	25	9	25-Sep	2020	14/10/2020	NA	2	9	173	164		NA	NA	78	4	2	Col_1_5_10	1.156069364
Col	1	Col-0	10	5	25	9	25-Sep	2020	14/10/2020	NA	2	9	173	164		NA	NA	78	5	2	Col_1_5_10	1.156069364
Col	1	Col-0	10	5	25	9	25-Sep	2020	14/10/2020	NA	2	9	173	164		NA	NA	78	6	3	Col_1_5_10	1.734104046
Col	1	Col-0	10	5	25	9	25-Sep	2020	14/10/2020	NA	2	9	173	164		NA	NA	78	7	1	Col_1_5_10	0.578034682
Col	1	Col-0	10	5	25	9	25-Sep	2020	14/10/2020	NA	2	9	173	164		NA	NA	78	8	0	Col_1_5_10	0
Col	1	Col-0	10	5	25	9	25-Sep	2020	14/10/2020	NA	2	9	173	164		NA	NA	78	9	1	Col_1_5_10	0.578034682
Col	1	Col-0	10	5	25	9	25-Sep	2020	14/10/2020	NA	2	9	173	164		NA	NA	78	10	0	Col_1_5_10	0
Col	1	Col-0	10	5	25	9	25-Sep	2020	14/10/2020	NA	2	9	173	164		NA	NA	78	11	0	Col_1_5_10	0
Col	1	Col-0	10	5	25	9	25-Sep	2020	14/10/2020	NA	2	9	173	164		NA	NA	78	12	0	Col_1_5_10	0
Col	1	Col-0	10	5	25	9	25-Sep	2020	14/10/2020	NA	2	9	173	164		NA	NA	78	13	0	Col_1_5_10	0
Col	1	Col-0	10	5	25	9	25-Sep	2020	14/10/2020	NA	2	9	173	164		NA	NA	78	14	0	Col_1_5_10	0
Col	1	Col-0	10	5	25	9	25-Sep	2020	14/10/2020	NA	2	9	173	164		NA	NA	78	15	0	Col_1_5_10	0
Col	1	Col-0	10	5	25	9	25-Sep	2020	14/10/2020	NA	2	9	173	164		NA	NA	78	16	0	Col_1_5_10	0
Col	1	Col-0	10	5	25	9	25-Sep	2020	14/10/2020	NA	2	9	173	164		NA	NA	78	17	0	Col_1_5_10	0
Col	1	Col-0	10	5	25	9	25-Sep	2020	14/10/2020	NA	2	9	173	164		NA	NA	78	18	0	Col_1_5_10	0
Col	1	Col-0	10	5	25	9	25-Sep	2020	14/10/2020	NA	2	9	173	164		NA	NA	78	19	0	Col_1_5_10	0
Col	1	Col-0	0	8	5	11	05-Nov	2020	23/11/2020	NA	30	196	196	0		NA	NA	169	1	0	Col_1_8_0	0
Col	1	Col-0	0	8	5	11	05-Nov	2020	23/11/2020	NA	30	196	196	0		NA	NA	169	2	44	Col_1_8_0	22.44897959
Col	1	Col-0	0	8	5	11	05-Nov	2020	23/11/2020	NA	30	196	196	0		NA	NA	169	3	130	Col_1_8_0	66.32653061
Col	1	Col-0	0	8	5	11	05-Nov	2020	23/11/2020	NA	30	196	196	0		NA	NA	169	4	16	Col_1_8_0	8.163265306
Col	1	Col-0	0	8	5	11	05-Nov	2020	23/11/2020	NA	30	196	196	0		NA	NA	169	5	4	Col_1_8_0	2.040816327
Col	1	Col-0	0	8	5	11	05-Nov	2020	23/11/2020	NA	30	196	196	0		NA	NA	169	6	0	Col_1_8_0	0
Col	1	Col-0	0	8	5	11	05-Nov	2020	23/11/2020	NA	30	196	196	0		NA	NA	169	7	2	Col_1_8_0	1.020408163
Col	1	Col-0	0	8	5	11	05-Nov	2020	23/11/2020	NA	30	196	196	0		NA	NA	169	8	0	Col_1_8_0	0
Col	1	Col-0	0	8	5	11	05-Nov	2020	23/11/2020	NA	30	196	196	0		NA	NA	169	9	0	Col_1_8_0	0
Col	1	Col-0	0	8	5	11	05-Nov	2020	23/11/2020	NA	30	196	196	0		NA	NA	169	10	0	Col_1_8_0	0
Col	1	Col-0	0	8	5	11	05-Nov	2020	23/11/2020	NA	30	196	196	0		NA	NA	169	11	0	Col_1_8_0	0
Col	1	Col-0	0	8	5	11	05-Nov	2020	23/11/2020	NA	30	196	196	0		NA	NA	169	12	0	Col_1_8_0	0
Col	1	Col-0	0	8	5	11	05-Nov	2020	23/11/2020	NA	30	196	196	0		NA	NA	169	13	0	Col_1_8_0	0
Col	1	Col-0	0	8	5	11	05-Nov	2020	23/11/2020	NA	30	196	196	0		NA	NA	169	14	0	Col_1_8_0	0
Col	1	Col-0	0	8	5	11	05-Nov	2020	23/11/2020	NA	30	196	196	0		NA	NA	169	15	0	Col_1_8_0	0
Col	1	Col-0	0	8	5	11	05-Nov	2020	23/11/2020	NA	30	196	196	0		NA	NA	169	16	0	Col_1_8_0	0
Col	1	Col-0	0	8	5	11	05-Nov	2020	23/11/2020	NA	30	196	196	0		NA	NA	169	17	0	Col_1_8_0	0
Col	1	Col-0	0	8	5	11	05-Nov	2020	23/11/2020	NA	30	196	196	0		NA	NA	169	18	0	Col_1_8_0	0
Col	1	Col-0	1	8	5	11	05-Nov	2020	23/11/2020	NA	30	173	182	9		NA	NA	172	1	0	Col_1_8_1	0
Col	1	Col-0	1	8	5	11	05-Nov	2020	23/11/2020	NA	30	173	182	9		NA	NA	172	2	0	Col_1_8_1	0
Col	1	Col-0	1	8	5	11	05-Nov	2020	23/11/2020	NA	30	173	182	9		NA	NA	172	3	65	Col_1_8_1	35.71428571
Col	1	Col-0	1	8	5	11	05-Nov	2020	23/11/2020	NA	30	173	182	9		NA	NA	172	4	66	Col_1_8_1	36.26373626
Col	1	Col-0	1	8	5	11	05-Nov	2020	23/11/2020	NA	30	173	182	9		NA	NA	172	5	23	Col_1_8_1	12.63736264
Col	1	Col-0	1	8	5	11	05-Nov	2020	23/11/2020	NA	30	173	182	9		NA	NA	172	6	9	Col_1_8_1	4.945054945
Col	1	Col-0	1	8	5	11	05-Nov	2020	23/11/2020	NA	30	173	182	9		NA	NA	172	7	1	Col_1_8_1	0.549450549
Col	1	Col-0	1	8	5	11	05-Nov	2020	23/11/2020	NA	30	173	182	9		NA	NA	172	8	0	Col_1_8_1	0
Col	1	Col-0	1	8	5	11	05-Nov	2020	23/11/2020	NA	30	173	182	9		NA	NA	172	9	2	Col_1_8_1	1.098901099
Col	1	Col-0	1	8	5	11	05-Nov	2020	23/11/2020	NA	30	173	182	9		NA	NA	172	10	1	Col_1_8_1	0.549450549
Col	1	Col-0	1	8	5	11	05-Nov	2020	23/11/2020	NA	30	173	182	9		NA	NA	172	11	1	Col_1_8_1	0.549450549
Col	1	Col-0	1	8	5	11	05-Nov	2020	23/11/2020	NA	30	173	182	9		NA	NA	172	12	1	Col_1_8_1	0.549450549
Col	1	Col-0	1	8	5	11	05-Nov	2020	23/11/2020	NA	30	173	182	9		NA	NA	172	13	1	Col_1_8_1	0.549450549
Col	1	Col-0	1	8	5	11	05-Nov	2020	23/11/2020	NA	30	173	182	9		NA	NA	172	14	2	Col_1_8_1	1.098901099
Col	1	Col-0	1	8	5	11	05-Nov	2020	23/11/2020	NA	30	173	182	9		NA	NA	172	15	0	Col_1_8_1	0
Col	1	Col-0	1	8	5	11	05-Nov	2020	23/11/2020	NA	30	173	182	9		NA	NA	172	16	1	Col_1_8_1	0.549450549
Col	1	Col-0	1	8	5	11	05-Nov	2020	23/11/2020	NA	30	173	182	9		NA	NA	172	17	0	Col_1_8_1	0
Col	1	Col-0	1	8	5	11	05-Nov	2020	23/11/2020	NA	30	173	182	9		NA	NA	172	18	0	Col_1_8_1	0
Col	1	Col-0	5	8	5	11	05-Nov	2020	23/11/2020	NA	30	31	169	138		NA	NA	175	1	0	Col_1_8_5	0
Col	1	Col-0	5	8	5	11	05-Nov	2020	23/11/2020	NA	30	31	169	138		NA	NA	175	2	0	Col_1_8_5	0
Col	1	Col-0	5	8	5	11	05-Nov	2020	23/11/2020	NA	30	31	169	138		NA	NA	175	3	1	Col_1_8_5	0.591715976
Col	1	Col-0	5	8	5	11	05-Nov	2020	23/11/2020	NA	30	31	169	138		NA	NA	175	4	1	Col_1_8_5	0.591715976
Col	1	Col-0	5	8	5	11	05-Nov	2020	23/11/2020	NA	30	31	169	138		NA	NA	175	5	2	Col_1_8_5	1.183431953
Col	1	Col-0	5	8	5	11	05-Nov	2020	23/11/2020	NA	30	31	169	138		NA	NA	175	6	0	Col_1_8_5	0
Col	1	Col-0	5	8	5	11	05-Nov	2020	23/11/2020	NA	30	31	169	138		NA	NA	175	7	2	Col_1_8_5	1.183431953
Col	1	Col-0	5	8	5	11	05-Nov	2020	23/11/2020	NA	30	31	169	138		NA	NA	175	8	0	Col_1_8_5	0
Col	1	Col-0	5	8	5	11	05-Nov	2020	23/11/2020	NA	30	31	169	138		NA	NA	175	9	1	Col_1_8_5	0.591715976
Col	1	Col-0	5	8	5	11	05-Nov	2020	23/11/2020	NA	30	31	169	138		NA	NA	175	10	2	Col_1_8_5	1.183431953
Col	1	Col-0	5	8	5	11	05-Nov	2020	23/11/2020	NA	30	31	169	138		NA	NA	175	11	1	Col_1_8_5	0.591715976
Col	1	Col-0	5	8	5	11	05-Nov	2020	23/11/2020	NA	30	31	169	138		NA	NA	175	12	2	Col_1_8_5	1.183431953
Col	1	Col-0	5	8	5	11	05-Nov	2020	23/11/2020	NA	30	31	169	138		NA	NA	175	13	2	Col_1_8_5	1.183431953
Col	1	Col-0	5	8	5	11	05-Nov	2020	23/11/2020	NA	30	31	169	138		NA	NA	175	14	4	Col_1_8_5	2.366863905
Col	1	Col-0	5	8	5	11	05-Nov	2020	23/11/2020	NA	30	31	169	138		NA	NA	175	15	3	Col_1_8_5	1.775147929
Col	1	Col-0	5	8	5	11	05-Nov	2020	23/11/2020	NA	30	31	169	138		NA	NA	175	16	3	Col_1_8_5	1.775147929
Col	1	Col-0	5	8	5	11	05-Nov	2020	23/11/2020	NA	30	31	169	138		NA	NA	175	17	1	Col_1_8_5	0.591715976
Col	1	Col-0	5	8	5	11	05-Nov	2020	23/11/2020	NA	30	31	169	138		NA	NA	175	18	6	Col_1_8_5	3.550295858
Col	1	Col-0	10	8	5	11	05-Nov	2020	23/11/2020	NA	30	1	193	192		NA	NA	178	1	0	Col_1_8_10	0
Col	1	Col-0	10	8	5	11	05-Nov	2020	23/11/2020	NA	30	1	193	192		NA	NA	178	2	0	Col_1_8_10	0
Col	1	Col-0	10	8	5	11	05-Nov	2020	23/11/2020	NA	30	1	193	192		NA	NA	178	3	1	Col_1_8_10	0.518134715
Col	1	Col-0	10	8	5	11	05-Nov	2020	23/11/2020	NA	30	1	193	192		NA	NA	178	4	0	Col_1_8_10	0
Col	1	Col-0	10	8	5	11	05-Nov	2020	23/11/2020	NA	30	1	193	192		NA	NA	178	5	0	Col_1_8_10	0
Col	1	Col-0	10	8	5	11	05-Nov	2020	23/11/2020	NA	30	1	193	192		NA	NA	178	6	0	Col_1_8_10	0
Col	1	Col-0	10	8	5	11	05-Nov	2020	23/11/2020	NA	30	1	193	192		NA	NA	178	7	0	Col_1_8_10	0
Col	1	Col-0	10	8	5	11	05-Nov	2020	23/11/2020	NA	30	1	193	192		NA	NA	178	8	0	Col_1_8_10	0
Col	1	Col-0	10	8	5	11	05-Nov	2020	23/11/2020	NA	30	1	193	192		NA	NA	178	9	0	Col_1_8_10	0
Col	1	Col-0	10	8	5	11	05-Nov	2020	23/11/2020	NA	30	1	193	192		NA	NA	178	10	0	Col_1_8_10	0
Col	1	Col-0	10	8	5	11	05-Nov	2020	23/11/2020	NA	30	1	193	192		NA	NA	178	11	0	Col_1_8_10	0
Col	1	Col-0	10	8	5	11	05-Nov	2020	23/11/2020	NA	30	1	193	192		NA	NA	178	12	0	Col_1_8_10	0
Col	1	Col-0	10	8	5	11	05-Nov	2020	23/11/2020	NA	30	1	193	192		NA	NA	178	13	0	Col_1_8_10	0
Col	1	Col-0	10	8	5	11	05-Nov	2020	23/11/2020	NA	30	1	193	192		NA	NA	178	14	0	Col_1_8_10	0
Col	1	Col-0	10	8	5	11	05-Nov	2020	23/11/2020	NA	30	1	193	192		NA	NA	178	15	0	Col_1_8_10	0
Col	1	Col-0	10	8	5	11	05-Nov	2020	23/11/2020	NA	30	1	193	192		NA	NA	178	16	0	Col_1_8_10	0
Col	1	Col-0	10	8	5	11	05-Nov	2020	23/11/2020	NA	30	1	193	192		NA	NA	178	17	0	Col_1_8_10	0
Col	1	Col-0	10	8	5	11	05-Nov	2020	23/11/2020	NA	30	1	193	192		NA	NA	178	18	0	Col_1_8_10	0
Col	2	Col-0	0	1	NA	NA	11-Oct	2017	25/11/2017	NA	10	139	139	0		NA	NA	3	1	0	Col_2_1_0	0
Col	2	Col-0	0	1	NA	NA	11-Oct	2017	25/11/2017	NA	10	139	139	0		NA	NA	3	2	4	Col_2_1_0	2.877697842
Col	2	Col-0	0	1	NA	NA	11-Oct	2017	25/11/2017	NA	10	139	139	0		NA	NA	3	3	127	Col_2_1_0	91.36690647
Col	2	Col-0	0	1	NA	NA	11-Oct	2017	25/11/2017	NA	10	139	139	0		NA	NA	3	4	4	Col_2_1_0	2.877697842
Col	2	Col-0	0	1	NA	NA	11-Oct	2017	25/11/2017	NA	10	139	139	0		NA	NA	3	5	4	Col_2_1_0	2.877697842
Col	2	Col-0	0	1	NA	NA	11-Oct	2017	25/11/2017	NA	10	139	139	0		NA	NA	3	6	0	Col_2_1_0	0
Col	2	Col-0	0	1	NA	NA	11-Oct	2017	25/11/2017	NA	10	139	139	0		NA	NA	3	7	0	Col_2_1_0	0
Col	2	Col-0	0	1	NA	NA	11-Oct	2017	25/11/2017	NA	10	139	139	0		NA	NA	3	8	0	Col_2_1_0	0
Col	2	Col-0	5	1	NA	NA	11-Oct	2017	25/11/2017	NA	10	57	130	73	none green, some of these germinated after scoring period	NA	NA	4	1	0	Col_2_1_5	0
Col	2	Col-0	5	1	NA	NA	11-Oct	2017	25/11/2017	NA	10	57	130	73	none green, some of these germinated after scoring period	NA	NA	4	2	2	Col_2_1_5	1.538461538
Col	2	Col-0	5	1	NA	NA	11-Oct	2017	25/11/2017	NA	10	57	130	73	none green, some of these germinated after scoring period	NA	NA	4	3	23	Col_2_1_5	17.69230769
Col	2	Col-0	5	1	NA	NA	11-Oct	2017	25/11/2017	NA	10	57	130	73	none green, some of these germinated after scoring period	NA	NA	4	4	15	Col_2_1_5	11.53846154
Col	2	Col-0	5	1	NA	NA	11-Oct	2017	25/11/2017	NA	10	57	130	73	none green, some of these germinated after scoring period	NA	NA	4	5	3	Col_2_1_5	2.307692308
Col	2	Col-0	5	1	NA	NA	11-Oct	2017	25/11/2017	NA	10	57	130	73	none green, some of these germinated after scoring period	NA	NA	4	6	1	Col_2_1_5	0.769230769
Col	2	Col-0	5	1	NA	NA	11-Oct	2017	25/11/2017	NA	10	57	130	73	none green, some of these germinated after scoring period	NA	NA	4	7	2	Col_2_1_5	1.538461538
Col	2	Col-0	5	1	NA	NA	11-Oct	2017	25/11/2017	NA	10	57	130	73	none green, some of these germinated after scoring period	NA	NA	4	8	2	Col_2_1_5	1.538461538
Col	2	Col-0	5	1	NA	NA	11-Oct	2017	25/11/2017	NA	10	57	130	73	none green, some of these germinated after scoring period	NA	NA	4	9	1	Col_2_1_5	0.769230769
Col	2	Col-0	5	1	NA	NA	11-Oct	2017	25/11/2017	NA	10	57	130	73	none green, some of these germinated after scoring period	NA	NA	4	10	0	Col_2_1_5	0
Col	2	Col-0	5	1	NA	NA	11-Oct	2017	25/11/2017	NA	10	57	130	73	none green, some of these germinated after scoring period	NA	NA	4	11	2	Col_2_1_5	1.538461538
Col	2	Col-0	5	1	NA	NA	11-Oct	2017	25/11/2017	NA	10	57	130	73	none green, some of these germinated after scoring period	NA	NA	4	12	2	Col_2_1_5	1.538461538
Col	2	Col-0	5	1	NA	NA	11-Oct	2017	25/11/2017	NA	10	57	130	73	none green, some of these germinated after scoring period	NA	NA	4	13	1	Col_2_1_5	0.769230769
Col	2	Col-0	5	1	NA	NA	11-Oct	2017	25/11/2017	NA	10	57	130	73	none green, some of these germinated after scoring period	NA	NA	4	14	3	Col_2_1_5	2.307692308
Col	2	Col-0	0	2	NA	NA	05-Dec	2017	19-Dec	NA	1	113	113	0		NA	NA	19	1	0	Col_2_2_0	0
Col	2	Col-0	0	2	NA	NA	05-Dec	2017	19-Dec	NA	1	113	113	0		NA	NA	19	2	11	Col_2_2_0	9.734513274
Col	2	Col-0	0	2	NA	NA	05-Dec	2017	19-Dec	NA	1	113	113	0		NA	NA	19	3	102	Col_2_2_0	90.26548673
Col	2	Col-0	0	2	NA	NA	05-Dec	2017	19-Dec	NA	1	113	113	0		NA	NA	19	4	0	Col_2_2_0	0
Col	2	Col-0	0	2	NA	NA	05-Dec	2017	19-Dec	NA	1	113	113	0		NA	NA	19	5	0	Col_2_2_0	0
Col	2	Col-0	0	2	NA	NA	05-Dec	2017	19-Dec	NA	1	113	113	0		NA	NA	19	6	0	Col_2_2_0	0
Col	2	Col-0	0	2	NA	NA	05-Dec	2017	19-Dec	NA	1	113	113	0		NA	NA	19	7	0	Col_2_2_0	0
Col	2	Col-0	0	2	NA	NA	05-Dec	2017	19-Dec	NA	1	113	113	0		NA	NA	19	8	0	Col_2_2_0	0
Col	2	Col-0	0	2	NA	NA	05-Dec	2017	19-Dec	NA	1	113	113	0		NA	NA	19	9	0	Col_2_2_0	0
Col	2	Col-0	0	2	NA	NA	05-Dec	2017	19-Dec	NA	1	113	113	0		NA	NA	19	10	0	Col_2_2_0	0
Col	2	Col-0	0	2	NA	NA	05-Dec	2017	19-Dec	NA	1	113	113	0		NA	NA	19	11	0	Col_2_2_0	0
Col	2	Col-0	0	2	NA	NA	05-Dec	2017	19-Dec	NA	1	113	113	0		NA	NA	19	12	0	Col_2_2_0	0
Col	2	Col-0	0	2	NA	NA	05-Dec	2017	19-Dec	NA	1	113	113	0		NA	NA	19	13	0	Col_2_2_0	0
Col	2	Col-0	0	2	NA	NA	05-Dec	2017	19-Dec	NA	1	113	113	0		NA	NA	19	14	0	Col_2_2_0	0
Col	2	Col-0	0	2	NA	NA	05-Dec	2017	19-Dec	NA	1	113	113	0		NA	NA	19	15	0	Col_2_2_0	0
Col	2	Col-0	0	2	NA	NA	05-Dec	2017	19-Dec	NA	1	113	113	0		NA	NA	19	16	0	Col_2_2_0	0
Col	2	Col-0	0	2	NA	NA	05-Dec	2017	19-Dec	NA	1	113	113	0		NA	NA	19	17	0	Col_2_2_0	0
Col	2	Col-0	0	2	NA	NA	05-Dec	2017	19-Dec	NA	1	113	113	0		NA	NA	19	18	0	Col_2_2_0	0
Col	2	Col-0	5	2	NA	NA	05-Dec	2017	19-Dec	NA	1	28	80	52		NA	NA	20	1	0	Col_2_2_5	0
Col	2	Col-0	5	2	NA	NA	05-Dec	2017	19-Dec	NA	1	28	80	52		NA	NA	20	2	0	Col_2_2_5	0
Col	2	Col-0	5	2	NA	NA	05-Dec	2017	19-Dec	NA	1	28	80	52		NA	NA	20	3	0	Col_2_2_5	0
Col	2	Col-0	5	2	NA	NA	05-Dec	2017	19-Dec	NA	1	28	80	52		NA	NA	20	4	6	Col_2_2_5	7.5
Col	2	Col-0	5	2	NA	NA	05-Dec	2017	19-Dec	NA	1	28	80	52		NA	NA	20	5	0	Col_2_2_5	0
Col	2	Col-0	5	2	NA	NA	05-Dec	2017	19-Dec	NA	1	28	80	52		NA	NA	20	6	0	Col_2_2_5	0
Col	2	Col-0	5	2	NA	NA	05-Dec	2017	19-Dec	NA	1	28	80	52		NA	NA	20	7	12	Col_2_2_5	15
Col	2	Col-0	5	2	NA	NA	05-Dec	2017	19-Dec	NA	1	28	80	52		NA	NA	20	8	5	Col_2_2_5	6.25
Col	2	Col-0	5	2	NA	NA	05-Dec	2017	19-Dec	NA	1	28	80	52		NA	NA	20	9	0	Col_2_2_5	0
Col	2	Col-0	5	2	NA	NA	05-Dec	2017	19-Dec	NA	1	28	80	52		NA	NA	20	10	1	Col_2_2_5	1.25
Col	2	Col-0	5	2	NA	NA	05-Dec	2017	19-Dec	NA	1	28	80	52		NA	NA	20	11	1	Col_2_2_5	1.25
Col	2	Col-0	5	2	NA	NA	05-Dec	2017	19-Dec	NA	1	28	80	52		NA	NA	20	12	0	Col_2_2_5	0
Col	2	Col-0	5	2	NA	NA	05-Dec	2017	19-Dec	NA	1	28	80	52		NA	NA	20	13	0	Col_2_2_5	0
Col	2	Col-0	5	2	NA	NA	05-Dec	2017	19-Dec	NA	1	28	80	52		NA	NA	20	14	1	Col_2_2_5	1.25
Col	2	Col-0	5	2	NA	NA	05-Dec	2017	19-Dec	NA	1	28	80	52		NA	NA	20	15	2	Col_2_2_5	2.5
Col	2	Col-0	5	2	NA	NA	05-Dec	2017	19-Dec	NA	1	28	80	52		NA	NA	20	16	0	Col_2_2_5	0
Col	2	Col-0	5	2	NA	NA	05-Dec	2017	19-Dec	NA	1	28	80	52		NA	NA	20	17	0	Col_2_2_5	0
Col	2	Col-0	5	2	NA	NA	05-Dec	2017	19-Dec	NA	1	28	80	52		NA	NA	20	18	0	Col_2_2_5	0
Col	2	Col-0	0	3	NA	NA	30-Jan	2018	28-Feb	NA	1	104	123	19		NA	NA	40	1	0	Col_2_3_0	0
Col	2	Col-0	0	3	NA	NA	30-Jan	2018	28-Feb	NA	1	104	123	19		NA	NA	40	2	0	Col_2_3_0	0
Col	2	Col-0	0	3	NA	NA	30-Jan	2018	28-Feb	NA	1	104	123	19		NA	NA	40	3	25	Col_2_3_0	20.32520325
Col	2	Col-0	0	3	NA	NA	30-Jan	2018	28-Feb	NA	1	104	123	19		NA	NA	40	4	37	Col_2_3_0	30.08130081
Col	2	Col-0	0	3	NA	NA	30-Jan	2018	28-Feb	NA	1	104	123	19		NA	NA	40	5	26	Col_2_3_0	21.13821138
Col	2	Col-0	0	3	NA	NA	30-Jan	2018	28-Feb	NA	1	104	123	19		NA	NA	40	6	16	Col_2_3_0	13.00813008
Col	2	Col-0	0	3	NA	NA	30-Jan	2018	28-Feb	NA	1	104	123	19		NA	NA	40	7	0	Col_2_3_0	0
Col	2	Col-0	0	3	NA	NA	30-Jan	2018	28-Feb	NA	1	104	123	19		NA	NA	40	8	0	Col_2_3_0	0
Col	2	Col-0	0	3	NA	NA	30-Jan	2018	28-Feb	NA	1	104	123	19		NA	NA	40	9	0	Col_2_3_0	0
Col	2	Col-0	0	3	NA	NA	30-Jan	2018	28-Feb	NA	1	104	123	19		NA	NA	40	10	0	Col_2_3_0	0
Col	2	Col-0	0	4	NA	NA	26-Feb	2018	08-Mar	NA	7	162	162	0		NA	NA	44	1	0	Col_2_4_0	0
Col	2	Col-0	0	4	NA	NA	26-Feb	2018	08-Mar	NA	7	162	162	0		NA	NA	44	2	3	Col_2_4_0	1.851851852
Col	2	Col-0	0	4	NA	NA	26-Feb	2018	08-Mar	NA	7	162	162	0		NA	NA	44	3	159	Col_2_4_0	98.14814815
Col	2	Col-0	0	4	NA	NA	26-Feb	2018	08-Mar	NA	7	162	162	0		NA	NA	44	4	0	Col_2_4_0	0
Col	2	Col-0	0	4	NA	NA	26-Feb	2018	08-Mar	NA	7	162	162	0		NA	NA	44	5	0	Col_2_4_0	0
Col	2	Col-0	0	4	NA	NA	26-Feb	2018	08-Mar	NA	7	162	162	0		NA	NA	44	6	0	Col_2_4_0	0
Col	2	Col-0	0	4	NA	NA	26-Feb	2018	08-Mar	NA	7	162	162	0		NA	NA	44	7	0	Col_2_4_0	0
Col	2	Col-0	0	4	NA	NA	26-Feb	2018	08-Mar	NA	7	162	162	0		NA	NA	44	8	0	Col_2_4_0	0
Col	2	Col-0	0	4	NA	NA	26-Feb	2018	08-Mar	NA	7	162	162	0		NA	NA	44	9	0	Col_2_4_0	0
Col	2	Col-0	0	4	NA	NA	26-Feb	2018	08-Mar	NA	7	162	162	0		NA	NA	44	10	0	Col_2_4_0	0
Col	2	Col-0	5	4	NA	NA	26-Feb	2018	08-Mar	NA	7	16	151	135	90% germinated	NA	NA	45	1	0	Col_2_4_5	0
Col	2	Col-0	5	4	NA	NA	26-Feb	2018	08-Mar	NA	7	16	151	135	90% germinated	NA	NA	45	2	0	Col_2_4_5	0
Col	2	Col-0	5	4	NA	NA	26-Feb	2018	08-Mar	NA	7	16	151	135	90% germinated	NA	NA	45	3	2	Col_2_4_5	1.324503311
Col	2	Col-0	5	4	NA	NA	26-Feb	2018	08-Mar	NA	7	16	151	135	90% germinated	NA	NA	45	4	2	Col_2_4_5	1.324503311
Col	2	Col-0	5	4	NA	NA	26-Feb	2018	08-Mar	NA	7	16	151	135	90% germinated	NA	NA	45	5	8	Col_2_4_5	5.298013245
Col	2	Col-0	5	4	NA	NA	26-Feb	2018	08-Mar	NA	7	16	151	135	90% germinated	NA	NA	45	6	0	Col_2_4_5	0
Col	2	Col-0	5	4	NA	NA	26-Feb	2018	08-Mar	NA	7	16	151	135	90% germinated	NA	NA	45	7	1	Col_2_4_5	0.662251656
Col	2	Col-0	5	4	NA	NA	26-Feb	2018	08-Mar	NA	7	16	151	135	90% germinated	NA	NA	45	8	0	Col_2_4_5	0
Col	2	Col-0	5	4	NA	NA	26-Feb	2018	08-Mar	NA	7	16	151	135	90% germinated	NA	NA	45	9	0	Col_2_4_5	0
Col	2	Col-0	5	4	NA	NA	26-Feb	2018	08-Mar	NA	7	16	151	135	90% germinated	NA	NA	45	10	3	Col_2_4_5	1.986754967
Col	2	Col-0	0	5	25	9	25-Sep	2020	14/10/2020	NA	2	179	181	2		NA	NA	70	1	0	Col_2_5_0	0
Col	2	Col-0	0	5	25	9	25-Sep	2020	14/10/2020	NA	2	179	181	2		NA	NA	70	2	13	Col_2_5_0	7.182320442
Col	2	Col-0	0	5	25	9	25-Sep	2020	14/10/2020	NA	2	179	181	2		NA	NA	70	3	144	Col_2_5_0	79.55801105
Col	2	Col-0	0	5	25	9	25-Sep	2020	14/10/2020	NA	2	179	181	2		NA	NA	70	4	8	Col_2_5_0	4.419889503
Col	2	Col-0	0	5	25	9	25-Sep	2020	14/10/2020	NA	2	179	181	2		NA	NA	70	5	9	Col_2_5_0	4.972375691
Col	2	Col-0	0	5	25	9	25-Sep	2020	14/10/2020	NA	2	179	181	2		NA	NA	70	6	3	Col_2_5_0	1.657458564
Col	2	Col-0	0	5	25	9	25-Sep	2020	14/10/2020	NA	2	179	181	2		NA	NA	70	7	2	Col_2_5_0	1.104972376
Col	2	Col-0	0	5	25	9	25-Sep	2020	14/10/2020	NA	2	179	181	2		NA	NA	70	8	0	Col_2_5_0	0
Col	2	Col-0	0	5	25	9	25-Sep	2020	14/10/2020	NA	2	179	181	2		NA	NA	70	9	0	Col_2_5_0	0
Col	2	Col-0	0	5	25	9	25-Sep	2020	14/10/2020	NA	2	179	181	2		NA	NA	70	10	0	Col_2_5_0	0
Col	2	Col-0	0	5	25	9	25-Sep	2020	14/10/2020	NA	2	179	181	2		NA	NA	70	11	0	Col_2_5_0	0
Col	2	Col-0	0	5	25	9	25-Sep	2020	14/10/2020	NA	2	179	181	2		NA	NA	70	12	0	Col_2_5_0	0
Col	2	Col-0	0	5	25	9	25-Sep	2020	14/10/2020	NA	2	179	181	2		NA	NA	70	13	0	Col_2_5_0	0
Col	2	Col-0	0	5	25	9	25-Sep	2020	14/10/2020	NA	2	179	181	2		NA	NA	70	14	0	Col_2_5_0	0
Col	2	Col-0	0	5	25	9	25-Sep	2020	14/10/2020	NA	2	179	181	2		NA	NA	70	15	0	Col_2_5_0	0
Col	2	Col-0	0	5	25	9	25-Sep	2020	14/10/2020	NA	2	179	181	2		NA	NA	70	16	0	Col_2_5_0	0
Col	2	Col-0	0	5	25	9	25-Sep	2020	14/10/2020	NA	2	179	181	2		NA	NA	70	17	0	Col_2_5_0	0
Col	2	Col-0	0	5	25	9	25-Sep	2020	14/10/2020	NA	2	179	181	2		NA	NA	70	18	0	Col_2_5_0	0
Col	2	Col-0	0	5	25	9	25-Sep	2020	14/10/2020	NA	2	179	181	2		NA	NA	70	19	0	Col_2_5_0	0
Col	2	Col-0	1	5	25	9	25-Sep	2020	14/10/2020	NA	2	162	165	3		NA	NA	73	1	0	Col_2_5_1	0
Col	2	Col-0	1	5	25	9	25-Sep	2020	14/10/2020	NA	2	162	165	3		NA	NA	73	2	4	Col_2_5_1	2.424242424
Col	2	Col-0	1	5	25	9	25-Sep	2020	14/10/2020	NA	2	162	165	3		NA	NA	73	3	96	Col_2_5_1	58.18181818
Col	2	Col-0	1	5	25	9	25-Sep	2020	14/10/2020	NA	2	162	165	3		NA	NA	73	4	45	Col_2_5_1	27.27272727
Col	2	Col-0	1	5	25	9	25-Sep	2020	14/10/2020	NA	2	162	165	3		NA	NA	73	5	6	Col_2_5_1	3.636363636
Col	2	Col-0	1	5	25	9	25-Sep	2020	14/10/2020	NA	2	162	165	3		NA	NA	73	6	6	Col_2_5_1	3.636363636
Col	2	Col-0	1	5	25	9	25-Sep	2020	14/10/2020	NA	2	162	165	3		NA	NA	73	7	0	Col_2_5_1	0
Col	2	Col-0	1	5	25	9	25-Sep	2020	14/10/2020	NA	2	162	165	3		NA	NA	73	8	1	Col_2_5_1	0.606060606
Col	2	Col-0	1	5	25	9	25-Sep	2020	14/10/2020	NA	2	162	165	3		NA	NA	73	9	1	Col_2_5_1	0.606060606
Col	2	Col-0	1	5	25	9	25-Sep	2020	14/10/2020	NA	2	162	165	3		NA	NA	73	10	1	Col_2_5_1	0.606060606
Col	2	Col-0	1	5	25	9	25-Sep	2020	14/10/2020	NA	2	162	165	3		NA	NA	73	11	0	Col_2_5_1	0
Col	2	Col-0	1	5	25	9	25-Sep	2020	14/10/2020	NA	2	162	165	3		NA	NA	73	12	0	Col_2_5_1	0
Col	2	Col-0	1	5	25	9	25-Sep	2020	14/10/2020	NA	2	162	165	3		NA	NA	73	13	0	Col_2_5_1	0
Col	2	Col-0	1	5	25	9	25-Sep	2020	14/10/2020	NA	2	162	165	3		NA	NA	73	14	0	Col_2_5_1	0
Col	2	Col-0	1	5	25	9	25-Sep	2020	14/10/2020	NA	2	162	165	3		NA	NA	73	15	0	Col_2_5_1	0
Col	2	Col-0	1	5	25	9	25-Sep	2020	14/10/2020	NA	2	162	165	3		NA	NA	73	16	1	Col_2_5_1	0.606060606
Col	2	Col-0	1	5	25	9	25-Sep	2020	14/10/2020	NA	2	162	165	3		NA	NA	73	17	0	Col_2_5_1	0
Col	2	Col-0	1	5	25	9	25-Sep	2020	14/10/2020	NA	2	162	165	3		NA	NA	73	18	0	Col_2_5_1	0
Col	2	Col-0	1	5	25	9	25-Sep	2020	14/10/2020	NA	2	162	165	3		NA	NA	73	19	1	Col_2_5_1	0.606060606
Col	2	Col-0	5	5	25	9	25-Sep	2020	14/10/2020	NA	2	132	161	29		NA	NA	76	1	0	Col_2_5_5	0
Col	2	Col-0	5	5	25	9	25-Sep	2020	14/10/2020	NA	2	132	161	29		NA	NA	76	2	3	Col_2_5_5	1.863354037
Col	2	Col-0	5	5	25	9	25-Sep	2020	14/10/2020	NA	2	132	161	29		NA	NA	76	3	11	Col_2_5_5	6.832298137
Col	2	Col-0	5	5	25	9	25-Sep	2020	14/10/2020	NA	2	132	161	29		NA	NA	76	4	20	Col_2_5_5	12.42236025
Col	2	Col-0	5	5	25	9	25-Sep	2020	14/10/2020	NA	2	132	161	29		NA	NA	76	5	16	Col_2_5_5	9.937888199
Col	2	Col-0	5	5	25	9	25-Sep	2020	14/10/2020	NA	2	132	161	29		NA	NA	76	6	18	Col_2_5_5	11.18012422
Col	2	Col-0	5	5	25	9	25-Sep	2020	14/10/2020	NA	2	132	161	29		NA	NA	76	7	21	Col_2_5_5	13.04347826
Col	2	Col-0	5	5	25	9	25-Sep	2020	14/10/2020	NA	2	132	161	29		NA	NA	76	8	5	Col_2_5_5	3.105590062
Col	2	Col-0	5	5	25	9	25-Sep	2020	14/10/2020	NA	2	132	161	29		NA	NA	76	9	5	Col_2_5_5	3.105590062
Col	2	Col-0	5	5	25	9	25-Sep	2020	14/10/2020	NA	2	132	161	29		NA	NA	76	10	6	Col_2_5_5	3.726708075
Col	2	Col-0	5	5	25	9	25-Sep	2020	14/10/2020	NA	2	132	161	29		NA	NA	76	11	1	Col_2_5_5	0.621118012
Col	2	Col-0	5	5	25	9	25-Sep	2020	14/10/2020	NA	2	132	161	29		NA	NA	76	12	1	Col_2_5_5	0.621118012
Col	2	Col-0	5	5	25	9	25-Sep	2020	14/10/2020	NA	2	132	161	29		NA	NA	76	13	3	Col_2_5_5	1.863354037
Col	2	Col-0	5	5	25	9	25-Sep	2020	14/10/2020	NA	2	132	161	29		NA	NA	76	14	0	Col_2_5_5	0
Col	2	Col-0	5	5	25	9	25-Sep	2020	14/10/2020	NA	2	132	161	29		NA	NA	76	15	5	Col_2_5_5	3.105590062
Col	2	Col-0	5	5	25	9	25-Sep	2020	14/10/2020	NA	2	132	161	29		NA	NA	76	16	4	Col_2_5_5	2.48447205
Col	2	Col-0	5	5	25	9	25-Sep	2020	14/10/2020	NA	2	132	161	29		NA	NA	76	17	3	Col_2_5_5	1.863354037
Col	2	Col-0	5	5	25	9	25-Sep	2020	14/10/2020	NA	2	132	161	29		NA	NA	76	18	3	Col_2_5_5	1.863354037
Col	2	Col-0	5	5	25	9	25-Sep	2020	14/10/2020	NA	2	132	161	29		NA	NA	76	19	7	Col_2_5_5	4.347826087
Col	2	Col-0	10	5	25	9	25-Sep	2020	14/10/2020	NA	2	11	169	158		NA	NA	79	1	0	Col_2_5_10	0
Col	2	Col-0	10	5	25	9	25-Sep	2020	14/10/2020	NA	2	11	169	158		NA	NA	79	2	0	Col_2_5_10	0
Col	2	Col-0	10	5	25	9	25-Sep	2020	14/10/2020	NA	2	11	169	158		NA	NA	79	3	0	Col_2_5_10	0
Col	2	Col-0	10	5	25	9	25-Sep	2020	14/10/2020	NA	2	11	169	158		NA	NA	79	4	2	Col_2_5_10	1.183431953
Col	2	Col-0	10	5	25	9	25-Sep	2020	14/10/2020	NA	2	11	169	158		NA	NA	79	5	3	Col_2_5_10	1.775147929
Col	2	Col-0	10	5	25	9	25-Sep	2020	14/10/2020	NA	2	11	169	158		NA	NA	79	6	2	Col_2_5_10	1.183431953
Col	2	Col-0	10	5	25	9	25-Sep	2020	14/10/2020	NA	2	11	169	158		NA	NA	79	7	3	Col_2_5_10	1.775147929
Col	2	Col-0	10	5	25	9	25-Sep	2020	14/10/2020	NA	2	11	169	158		NA	NA	79	8	0	Col_2_5_10	0
Col	2	Col-0	10	5	25	9	25-Sep	2020	14/10/2020	NA	2	11	169	158		NA	NA	79	9	0	Col_2_5_10	0
Col	2	Col-0	10	5	25	9	25-Sep	2020	14/10/2020	NA	2	11	169	158		NA	NA	79	10	1	Col_2_5_10	0.591715976
Col	2	Col-0	10	5	25	9	25-Sep	2020	14/10/2020	NA	2	11	169	158		NA	NA	79	11	0	Col_2_5_10	0
Col	2	Col-0	10	5	25	9	25-Sep	2020	14/10/2020	NA	2	11	169	158		NA	NA	79	12	0	Col_2_5_10	0
Col	2	Col-0	10	5	25	9	25-Sep	2020	14/10/2020	NA	2	11	169	158		NA	NA	79	13	0	Col_2_5_10	0
Col	2	Col-0	10	5	25	9	25-Sep	2020	14/10/2020	NA	2	11	169	158		NA	NA	79	14	0	Col_2_5_10	0
Col	2	Col-0	10	5	25	9	25-Sep	2020	14/10/2020	NA	2	11	169	158		NA	NA	79	15	0	Col_2_5_10	0
Col	2	Col-0	10	5	25	9	25-Sep	2020	14/10/2020	NA	2	11	169	158		NA	NA	79	16	0	Col_2_5_10	0
Col	2	Col-0	10	5	25	9	25-Sep	2020	14/10/2020	NA	2	11	169	158		NA	NA	79	17	0	Col_2_5_10	0
Col	2	Col-0	10	5	25	9	25-Sep	2020	14/10/2020	NA	2	11	169	158		NA	NA	79	18	0	Col_2_5_10	0
Col	2	Col-0	10	5	25	9	25-Sep	2020	14/10/2020	NA	2	11	169	158		NA	NA	79	19	0	Col_2_5_10	0
Col	2	Col-0	0	8	5	11	05-Nov	2020	23/11/2020	NA	30	194	194	0		NA	NA	170	1	0	Col_2_8_0	0
Col	2	Col-0	0	8	5	11	05-Nov	2020	23/11/2020	NA	30	194	194	0		NA	NA	170	2	72	Col_2_8_0	37.11340206
Col	2	Col-0	0	8	5	11	05-Nov	2020	23/11/2020	NA	30	194	194	0		NA	NA	170	3	121	Col_2_8_0	62.37113402
Col	2	Col-0	0	8	5	11	05-Nov	2020	23/11/2020	NA	30	194	194	0		NA	NA	170	4	1	Col_2_8_0	0.515463918
Col	2	Col-0	0	8	5	11	05-Nov	2020	23/11/2020	NA	30	194	194	0		NA	NA	170	5	0	Col_2_8_0	0
Col	2	Col-0	0	8	5	11	05-Nov	2020	23/11/2020	NA	30	194	194	0		NA	NA	170	6	0	Col_2_8_0	0
Col	2	Col-0	0	8	5	11	05-Nov	2020	23/11/2020	NA	30	194	194	0		NA	NA	170	7	0	Col_2_8_0	0
Col	2	Col-0	0	8	5	11	05-Nov	2020	23/11/2020	NA	30	194	194	0		NA	NA	170	8	0	Col_2_8_0	0
Col	2	Col-0	0	8	5	11	05-Nov	2020	23/11/2020	NA	30	194	194	0		NA	NA	170	9	0	Col_2_8_0	0
Col	2	Col-0	0	8	5	11	05-Nov	2020	23/11/2020	NA	30	194	194	0		NA	NA	170	10	0	Col_2_8_0	0
Col	2	Col-0	0	8	5	11	05-Nov	2020	23/11/2020	NA	30	194	194	0		NA	NA	170	11	0	Col_2_8_0	0
Col	2	Col-0	0	8	5	11	05-Nov	2020	23/11/2020	NA	30	194	194	0		NA	NA	170	12	0	Col_2_8_0	0
Col	2	Col-0	0	8	5	11	05-Nov	2020	23/11/2020	NA	30	194	194	0		NA	NA	170	13	0	Col_2_8_0	0
Col	2	Col-0	0	8	5	11	05-Nov	2020	23/11/2020	NA	30	194	194	0		NA	NA	170	14	0	Col_2_8_0	0
Col	2	Col-0	0	8	5	11	05-Nov	2020	23/11/2020	NA	30	194	194	0		NA	NA	170	15	0	Col_2_8_0	0
Col	2	Col-0	0	8	5	11	05-Nov	2020	23/11/2020	NA	30	194	194	0		NA	NA	170	16	0	Col_2_8_0	0
Col	2	Col-0	0	8	5	11	05-Nov	2020	23/11/2020	NA	30	194	194	0		NA	NA	170	17	0	Col_2_8_0	0
Col	2	Col-0	0	8	5	11	05-Nov	2020	23/11/2020	NA	30	194	194	0		NA	NA	170	18	0	Col_2_8_0	0
Col	2	Col-0	1	8	5	11	05-Nov	2020	23/11/2020	NA	30	215	215	0		NA	NA	173	1	0	Col_2_8_1	0
Col	2	Col-0	1	8	5	11	05-Nov	2020	23/11/2020	NA	30	215	215	0		NA	NA	173	2	1	Col_2_8_1	0.465116279
Col	2	Col-0	1	8	5	11	05-Nov	2020	23/11/2020	NA	30	215	215	0		NA	NA	173	3	121	Col_2_8_1	56.27906977
Col	2	Col-0	1	8	5	11	05-Nov	2020	23/11/2020	NA	30	215	215	0		NA	NA	173	4	82	Col_2_8_1	38.13953488
Col	2	Col-0	1	8	5	11	05-Nov	2020	23/11/2020	NA	30	215	215	0		NA	NA	173	5	7	Col_2_8_1	3.255813953
Col	2	Col-0	1	8	5	11	05-Nov	2020	23/11/2020	NA	30	215	215	0		NA	NA	173	6	3	Col_2_8_1	1.395348837
Col	2	Col-0	1	8	5	11	05-Nov	2020	23/11/2020	NA	30	215	215	0		NA	NA	173	7	1	Col_2_8_1	0.465116279
Col	2	Col-0	1	8	5	11	05-Nov	2020	23/11/2020	NA	30	215	215	0		NA	NA	173	8	0	Col_2_8_1	0
Col	2	Col-0	1	8	5	11	05-Nov	2020	23/11/2020	NA	30	215	215	0		NA	NA	173	9	0	Col_2_8_1	0
Col	2	Col-0	1	8	5	11	05-Nov	2020	23/11/2020	NA	30	215	215	0		NA	NA	173	10	0	Col_2_8_1	0
Col	2	Col-0	1	8	5	11	05-Nov	2020	23/11/2020	NA	30	215	215	0		NA	NA	173	11	0	Col_2_8_1	0
Col	2	Col-0	1	8	5	11	05-Nov	2020	23/11/2020	NA	30	215	215	0		NA	NA	173	12	0	Col_2_8_1	0
Col	2	Col-0	1	8	5	11	05-Nov	2020	23/11/2020	NA	30	215	215	0		NA	NA	173	13	0	Col_2_8_1	0
Col	2	Col-0	1	8	5	11	05-Nov	2020	23/11/2020	NA	30	215	215	0		NA	NA	173	14	0	Col_2_8_1	0
Col	2	Col-0	1	8	5	11	05-Nov	2020	23/11/2020	NA	30	215	215	0		NA	NA	173	15	0	Col_2_8_1	0
Col	2	Col-0	1	8	5	11	05-Nov	2020	23/11/2020	NA	30	215	215	0		NA	NA	173	16	0	Col_2_8_1	0
Col	2	Col-0	1	8	5	11	05-Nov	2020	23/11/2020	NA	30	215	215	0		NA	NA	173	17	0	Col_2_8_1	0
Col	2	Col-0	1	8	5	11	05-Nov	2020	23/11/2020	NA	30	215	215	0		NA	NA	173	18	0	Col_2_8_1	0
Col	2	Col-0	5	8	5	11	05-Nov	2020	23/11/2020	NA	30	42	188	146		NA	NA	176	1	0	Col_2_8_5	0
Col	2	Col-0	5	8	5	11	05-Nov	2020	23/11/2020	NA	30	42	188	146		NA	NA	176	2	0	Col_2_8_5	0
Col	2	Col-0	5	8	5	11	05-Nov	2020	23/11/2020	NA	30	42	188	146		NA	NA	176	3	2	Col_2_8_5	1.063829787
Col	2	Col-0	5	8	5	11	05-Nov	2020	23/11/2020	NA	30	42	188	146		NA	NA	176	4	1	Col_2_8_5	0.531914894
Col	2	Col-0	5	8	5	11	05-Nov	2020	23/11/2020	NA	30	42	188	146		NA	NA	176	5	3	Col_2_8_5	1.595744681
Col	2	Col-0	5	8	5	11	05-Nov	2020	23/11/2020	NA	30	42	188	146		NA	NA	176	6	5	Col_2_8_5	2.659574468
Col	2	Col-0	5	8	5	11	05-Nov	2020	23/11/2020	NA	30	42	188	146		NA	NA	176	7	3	Col_2_8_5	1.595744681
Col	2	Col-0	5	8	5	11	05-Nov	2020	23/11/2020	NA	30	42	188	146		NA	NA	176	8	0	Col_2_8_5	0
Col	2	Col-0	5	8	5	11	05-Nov	2020	23/11/2020	NA	30	42	188	146		NA	NA	176	9	5	Col_2_8_5	2.659574468
Col	2	Col-0	5	8	5	11	05-Nov	2020	23/11/2020	NA	30	42	188	146		NA	NA	176	10	3	Col_2_8_5	1.595744681
Col	2	Col-0	5	8	5	11	05-Nov	2020	23/11/2020	NA	30	42	188	146		NA	NA	176	11	2	Col_2_8_5	1.063829787
Col	2	Col-0	5	8	5	11	05-Nov	2020	23/11/2020	NA	30	42	188	146		NA	NA	176	12	0	Col_2_8_5	0
Col	2	Col-0	5	8	5	11	05-Nov	2020	23/11/2020	NA	30	42	188	146		NA	NA	176	13	1	Col_2_8_5	0.531914894
Col	2	Col-0	5	8	5	11	05-Nov	2020	23/11/2020	NA	30	42	188	146		NA	NA	176	14	4	Col_2_8_5	2.127659574
Col	2	Col-0	5	8	5	11	05-Nov	2020	23/11/2020	NA	30	42	188	146		NA	NA	176	15	4	Col_2_8_5	2.127659574
Col	2	Col-0	5	8	5	11	05-Nov	2020	23/11/2020	NA	30	42	188	146		NA	NA	176	16	3	Col_2_8_5	1.595744681
Col	2	Col-0	5	8	5	11	05-Nov	2020	23/11/2020	NA	30	42	188	146		NA	NA	176	17	4	Col_2_8_5	2.127659574
Col	2	Col-0	5	8	5	11	05-Nov	2020	23/11/2020	NA	30	42	188	146		NA	NA	176	18	2	Col_2_8_5	1.063829787
Col	2	Col-0	10	8	5	11	05-Nov	2020	23/11/2020	NA	30	4	169	165		NA	NA	179	1	0	Col_2_8_10	0
Col	2	Col-0	10	8	5	11	05-Nov	2020	23/11/2020	NA	30	4	169	165		NA	NA	179	2	0	Col_2_8_10	0
Col	2	Col-0	10	8	5	11	05-Nov	2020	23/11/2020	NA	30	4	169	165		NA	NA	179	3	1	Col_2_8_10	0.591715976
Col	2	Col-0	10	8	5	11	05-Nov	2020	23/11/2020	NA	30	4	169	165		NA	NA	179	4	0	Col_2_8_10	0
Col	2	Col-0	10	8	5	11	05-Nov	2020	23/11/2020	NA	30	4	169	165		NA	NA	179	5	1	Col_2_8_10	0.591715976
Col	2	Col-0	10	8	5	11	05-Nov	2020	23/11/2020	NA	30	4	169	165		NA	NA	179	6	0	Col_2_8_10	0
Col	2	Col-0	10	8	5	11	05-Nov	2020	23/11/2020	NA	30	4	169	165		NA	NA	179	7	0	Col_2_8_10	0
Col	2	Col-0	10	8	5	11	05-Nov	2020	23/11/2020	NA	30	4	169	165		NA	NA	179	8	1	Col_2_8_10	0.591715976
Col	2	Col-0	10	8	5	11	05-Nov	2020	23/11/2020	NA	30	4	169	165		NA	NA	179	9	0	Col_2_8_10	0
Col	2	Col-0	10	8	5	11	05-Nov	2020	23/11/2020	NA	30	4	169	165		NA	NA	179	10	0	Col_2_8_10	0
Col	2	Col-0	10	8	5	11	05-Nov	2020	23/11/2020	NA	30	4	169	165		NA	NA	179	11	0	Col_2_8_10	0
Col	2	Col-0	10	8	5	11	05-Nov	2020	23/11/2020	NA	30	4	169	165		NA	NA	179	12	0	Col_2_8_10	0
Col	2	Col-0	10	8	5	11	05-Nov	2020	23/11/2020	NA	30	4	169	165		NA	NA	179	13	0	Col_2_8_10	0
Col	2	Col-0	10	8	5	11	05-Nov	2020	23/11/2020	NA	30	4	169	165		NA	NA	179	14	1	Col_2_8_10	0.591715976
Col	2	Col-0	10	8	5	11	05-Nov	2020	23/11/2020	NA	30	4	169	165		NA	NA	179	15	0	Col_2_8_10	0
Col	2	Col-0	10	8	5	11	05-Nov	2020	23/11/2020	NA	30	4	169	165		NA	NA	179	16	0	Col_2_8_10	0
Col	2	Col-0	10	8	5	11	05-Nov	2020	23/11/2020	NA	30	4	169	165		NA	NA	179	17	0	Col_2_8_10	0
Col	2	Col-0	10	8	5	11	05-Nov	2020	23/11/2020	NA	30	4	169	165		NA	NA	179	18	0	Col_2_8_10	0
Col	3	Col-0	0	1	NA	NA	11-Oct	2017	25/11/2017	NA	10	129	129	0		NA	NA	5	1	0	Col_3_1_0	0
Col	3	Col-0	0	1	NA	NA	11-Oct	2017	25/11/2017	NA	10	129	129	0		NA	NA	5	2	10	Col_3_1_0	7.751937984
Col	3	Col-0	0	1	NA	NA	11-Oct	2017	25/11/2017	NA	10	129	129	0		NA	NA	5	3	104	Col_3_1_0	80.62015504
Col	3	Col-0	0	1	NA	NA	11-Oct	2017	25/11/2017	NA	10	129	129	0		NA	NA	5	4	6	Col_3_1_0	4.651162791
Col	3	Col-0	0	1	NA	NA	11-Oct	2017	25/11/2017	NA	10	129	129	0		NA	NA	5	5	6	Col_3_1_0	4.651162791
Col	3	Col-0	0	1	NA	NA	11-Oct	2017	25/11/2017	NA	10	129	129	0		NA	NA	5	6	1	Col_3_1_0	0.775193798
Col	3	Col-0	0	1	NA	NA	11-Oct	2017	25/11/2017	NA	10	129	129	0		NA	NA	5	7	1	Col_3_1_0	0.775193798
Col	3	Col-0	0	1	NA	NA	11-Oct	2017	25/11/2017	NA	10	129	129	0		NA	NA	5	8	1	Col_3_1_0	0.775193798
Col	3	Col-0	5	1	NA	NA	11-Oct	2017	25/11/2017	NA	10	30	125	95	not green	NA	NA	6	1	0	Col_3_1_5	0
Col	3	Col-0	5	1	NA	NA	11-Oct	2017	25/11/2017	NA	10	30	125	95	not green	NA	NA	6	2	0	Col_3_1_5	0
Col	3	Col-0	5	1	NA	NA	11-Oct	2017	25/11/2017	NA	10	30	125	95	not green	NA	NA	6	3	12	Col_3_1_5	9.6
Col	3	Col-0	5	1	NA	NA	11-Oct	2017	25/11/2017	NA	10	30	125	95	not green	NA	NA	6	4	2	Col_3_1_5	1.6
Col	3	Col-0	5	1	NA	NA	11-Oct	2017	25/11/2017	NA	10	30	125	95	not green	NA	NA	6	5	4	Col_3_1_5	3.2
Col	3	Col-0	5	1	NA	NA	11-Oct	2017	25/11/2017	NA	10	30	125	95	not green	NA	NA	6	6	2	Col_3_1_5	1.6
Col	3	Col-0	5	1	NA	NA	11-Oct	2017	25/11/2017	NA	10	30	125	95	not green	NA	NA	6	7	1	Col_3_1_5	0.8
Col	3	Col-0	5	1	NA	NA	11-Oct	2017	25/11/2017	NA	10	30	125	95	not green	NA	NA	6	8	4	Col_3_1_5	3.2
Col	3	Col-0	5	1	NA	NA	11-Oct	2017	25/11/2017	NA	10	30	125	95	not green	NA	NA	6	9	2	Col_3_1_5	1.6
Col	3	Col-0	5	1	NA	NA	11-Oct	2017	25/11/2017	NA	10	30	125	95	not green	NA	NA	6	10	0	Col_3_1_5	0
Col	3	Col-0	5	1	NA	NA	11-Oct	2017	25/11/2017	NA	10	30	125	95	not green	NA	NA	6	11	0	Col_3_1_5	0
Col	3	Col-0	5	1	NA	NA	11-Oct	2017	25/11/2017	NA	10	30	125	95	not green	NA	NA	6	12	2	Col_3_1_5	1.6
Col	3	Col-0	5	1	NA	NA	11-Oct	2017	25/11/2017	NA	10	30	125	95	not green	NA	NA	6	13	0	Col_3_1_5	0
Col	3	Col-0	5	1	NA	NA	11-Oct	2017	25/11/2017	NA	10	30	125	95	not green	NA	NA	6	14	1	Col_3_1_5	0.8
Col	3	Col-0	0	3	NA	NA	30-Jan	2018	28-Feb	NA	1	112	148	36		NA	NA	41	1	0	Col_3_3_0	0
Col	3	Col-0	0	3	NA	NA	30-Jan	2018	28-Feb	NA	1	112	148	36		NA	NA	41	2	0	Col_3_3_0	0
Col	3	Col-0	0	3	NA	NA	30-Jan	2018	28-Feb	NA	1	112	148	36		NA	NA	41	3	1	Col_3_3_0	0.675675676
Col	3	Col-0	0	3	NA	NA	30-Jan	2018	28-Feb	NA	1	112	148	36		NA	NA	41	4	21	Col_3_3_0	14.18918919
Col	3	Col-0	0	3	NA	NA	30-Jan	2018	28-Feb	NA	1	112	148	36		NA	NA	41	5	57	Col_3_3_0	38.51351351
Col	3	Col-0	0	3	NA	NA	30-Jan	2018	28-Feb	NA	1	112	148	36		NA	NA	41	6	31	Col_3_3_0	20.94594595
Col	3	Col-0	0	3	NA	NA	30-Jan	2018	28-Feb	NA	1	112	148	36		NA	NA	41	7	0	Col_3_3_0	0
Col	3	Col-0	0	3	NA	NA	30-Jan	2018	28-Feb	NA	1	112	148	36		NA	NA	41	8	0	Col_3_3_0	0
Col	3	Col-0	0	3	NA	NA	30-Jan	2018	28-Feb	NA	1	112	148	36		NA	NA	41	9	0	Col_3_3_0	0
Col	3	Col-0	0	3	NA	NA	30-Jan	2018	28-Feb	NA	1	112	148	36		NA	NA	41	10	2	Col_3_3_0	1.351351351
Col	3	Col-0	0	4	NA	NA	26-Feb	2018	08-Mar	NA	7	144	144	0		NA	NA	46	1	0	Col_3_4_0	0
Col	3	Col-0	0	4	NA	NA	26-Feb	2018	08-Mar	NA	7	144	144	0		NA	NA	46	2	0	Col_3_4_0	0
Col	3	Col-0	0	4	NA	NA	26-Feb	2018	08-Mar	NA	7	144	144	0		NA	NA	46	3	141	Col_3_4_0	97.91666667
Col	3	Col-0	0	4	NA	NA	26-Feb	2018	08-Mar	NA	7	144	144	0		NA	NA	46	4	3	Col_3_4_0	2.083333333
Col	3	Col-0	0	4	NA	NA	26-Feb	2018	08-Mar	NA	7	144	144	0		NA	NA	46	5	0	Col_3_4_0	0
Col	3	Col-0	0	4	NA	NA	26-Feb	2018	08-Mar	NA	7	144	144	0		NA	NA	46	6	0	Col_3_4_0	0
Col	3	Col-0	0	4	NA	NA	26-Feb	2018	08-Mar	NA	7	144	144	0		NA	NA	46	7	0	Col_3_4_0	0
Col	3	Col-0	0	4	NA	NA	26-Feb	2018	08-Mar	NA	7	144	144	0		NA	NA	46	8	0	Col_3_4_0	0
Col	3	Col-0	0	4	NA	NA	26-Feb	2018	08-Mar	NA	7	144	144	0		NA	NA	46	9	0	Col_3_4_0	0
Col	3	Col-0	0	4	NA	NA	26-Feb	2018	08-Mar	NA	7	144	144	0		NA	NA	46	10	0	Col_3_4_0	0
Col	3	Col-0	5	4	NA	NA	26-Feb	2018	08-Mar	NA	7	18	146	128	nearly all 128 germ with radicle protrustion outside scoring period. 0 green	NA	NA	47	1	0	Col_3_4_5	0
Col	3	Col-0	5	4	NA	NA	26-Feb	2018	08-Mar	NA	7	18	146	128	nearly all 128 germ with radicle protrustion outside scoring period. 0 green	NA	NA	47	2	0	Col_3_4_5	0
Col	3	Col-0	5	4	NA	NA	26-Feb	2018	08-Mar	NA	7	18	146	128	nearly all 128 germ with radicle protrustion outside scoring period. 0 green	NA	NA	47	3	3	Col_3_4_5	2.054794521
Col	3	Col-0	5	4	NA	NA	26-Feb	2018	08-Mar	NA	7	18	146	128	nearly all 128 germ with radicle protrustion outside scoring period. 0 green	NA	NA	47	4	4	Col_3_4_5	2.739726027
Col	3	Col-0	5	4	NA	NA	26-Feb	2018	08-Mar	NA	7	18	146	128	nearly all 128 germ with radicle protrustion outside scoring period. 0 green	NA	NA	47	5	4	Col_3_4_5	2.739726027
Col	3	Col-0	5	4	NA	NA	26-Feb	2018	08-Mar	NA	7	18	146	128	nearly all 128 germ with radicle protrustion outside scoring period. 0 green	NA	NA	47	6	4	Col_3_4_5	2.739726027
Col	3	Col-0	5	4	NA	NA	26-Feb	2018	08-Mar	NA	7	18	146	128	nearly all 128 germ with radicle protrustion outside scoring period. 0 green	NA	NA	47	7	2	Col_3_4_5	1.369863014
Col	3	Col-0	5	4	NA	NA	26-Feb	2018	08-Mar	NA	7	18	146	128	nearly all 128 germ with radicle protrustion outside scoring period. 0 green	NA	NA	47	8	0	Col_3_4_5	0
Col	3	Col-0	5	4	NA	NA	26-Feb	2018	08-Mar	NA	7	18	146	128	nearly all 128 germ with radicle protrustion outside scoring period. 0 green	NA	NA	47	9	0	Col_3_4_5	0
Col	3	Col-0	5	4	NA	NA	26-Feb	2018	08-Mar	NA	7	18	146	128	nearly all 128 germ with radicle protrustion outside scoring period. 0 green	NA	NA	47	10	1	Col_3_4_5	0.684931507
Col	3	Col-0	0	5	25	9	25-Sep	2020	14/10/2020	NA	2	162	163	1		NA	NA	71	1	0	Col_3_5_0	0
Col	3	Col-0	0	5	25	9	25-Sep	2020	14/10/2020	NA	2	162	163	1		NA	NA	71	2	10	Col_3_5_0	6.134969325
Col	3	Col-0	0	5	25	9	25-Sep	2020	14/10/2020	NA	2	162	163	1		NA	NA	71	3	123	Col_3_5_0	75.4601227
Col	3	Col-0	0	5	25	9	25-Sep	2020	14/10/2020	NA	2	162	163	1		NA	NA	71	4	1	Col_3_5_0	0.613496933
Col	3	Col-0	0	5	25	9	25-Sep	2020	14/10/2020	NA	2	162	163	1		NA	NA	71	5	18	Col_3_5_0	11.04294479
Col	3	Col-0	0	5	25	9	25-Sep	2020	14/10/2020	NA	2	162	163	1		NA	NA	71	6	9	Col_3_5_0	5.521472393
Col	3	Col-0	0	5	25	9	25-Sep	2020	14/10/2020	NA	2	162	163	1		NA	NA	71	7	1	Col_3_5_0	0.613496933
Col	3	Col-0	0	5	25	9	25-Sep	2020	14/10/2020	NA	2	162	163	1		NA	NA	71	8	0	Col_3_5_0	0
Col	3	Col-0	0	5	25	9	25-Sep	2020	14/10/2020	NA	2	162	163	1		NA	NA	71	9	0	Col_3_5_0	0
Col	3	Col-0	0	5	25	9	25-Sep	2020	14/10/2020	NA	2	162	163	1		NA	NA	71	10	0	Col_3_5_0	0
Col	3	Col-0	0	5	25	9	25-Sep	2020	14/10/2020	NA	2	162	163	1		NA	NA	71	11	0	Col_3_5_0	0
Col	3	Col-0	0	5	25	9	25-Sep	2020	14/10/2020	NA	2	162	163	1		NA	NA	71	12	0	Col_3_5_0	0
Col	3	Col-0	0	5	25	9	25-Sep	2020	14/10/2020	NA	2	162	163	1		NA	NA	71	13	0	Col_3_5_0	0
Col	3	Col-0	0	5	25	9	25-Sep	2020	14/10/2020	NA	2	162	163	1		NA	NA	71	14	0	Col_3_5_0	0
Col	3	Col-0	0	5	25	9	25-Sep	2020	14/10/2020	NA	2	162	163	1		NA	NA	71	15	0	Col_3_5_0	0
Col	3	Col-0	0	5	25	9	25-Sep	2020	14/10/2020	NA	2	162	163	1		NA	NA	71	16	0	Col_3_5_0	0
Col	3	Col-0	0	5	25	9	25-Sep	2020	14/10/2020	NA	2	162	163	1		NA	NA	71	17	0	Col_3_5_0	0
Col	3	Col-0	0	5	25	9	25-Sep	2020	14/10/2020	NA	2	162	163	1		NA	NA	71	18	0	Col_3_5_0	0
Col	3	Col-0	0	5	25	9	25-Sep	2020	14/10/2020	NA	2	162	163	1		NA	NA	71	19	0	Col_3_5_0	0
Col	3	Col-0	1	5	25	9	25-Sep	2020	14/10/2020	NA	2	175	177	2		NA	NA	74	1	0	Col_3_5_1	0
Col	3	Col-0	1	5	25	9	25-Sep	2020	14/10/2020	NA	2	175	177	2		NA	NA	74	2	3	Col_3_5_1	1.694915254
Col	3	Col-0	1	5	25	9	25-Sep	2020	14/10/2020	NA	2	175	177	2		NA	NA	74	3	105	Col_3_5_1	59.3220339
Col	3	Col-0	1	5	25	9	25-Sep	2020	14/10/2020	NA	2	175	177	2		NA	NA	74	4	44	Col_3_5_1	24.85875706
Col	3	Col-0	1	5	25	9	25-Sep	2020	14/10/2020	NA	2	175	177	2		NA	NA	74	5	12	Col_3_5_1	6.779661017
Col	3	Col-0	1	5	25	9	25-Sep	2020	14/10/2020	NA	2	175	177	2		NA	NA	74	6	3	Col_3_5_1	1.694915254
Col	3	Col-0	1	5	25	9	25-Sep	2020	14/10/2020	NA	2	175	177	2		NA	NA	74	7	2	Col_3_5_1	1.129943503
Col	3	Col-0	1	5	25	9	25-Sep	2020	14/10/2020	NA	2	175	177	2		NA	NA	74	8	1	Col_3_5_1	0.564971751
Col	3	Col-0	1	5	25	9	25-Sep	2020	14/10/2020	NA	2	175	177	2		NA	NA	74	9	1	Col_3_5_1	0.564971751
Col	3	Col-0	1	5	25	9	25-Sep	2020	14/10/2020	NA	2	175	177	2		NA	NA	74	10	2	Col_3_5_1	1.129943503
Col	3	Col-0	1	5	25	9	25-Sep	2020	14/10/2020	NA	2	175	177	2		NA	NA	74	11	0	Col_3_5_1	0
Col	3	Col-0	1	5	25	9	25-Sep	2020	14/10/2020	NA	2	175	177	2		NA	NA	74	12	1	Col_3_5_1	0.564971751
Col	3	Col-0	1	5	25	9	25-Sep	2020	14/10/2020	NA	2	175	177	2		NA	NA	74	13	0	Col_3_5_1	0
Col	3	Col-0	1	5	25	9	25-Sep	2020	14/10/2020	NA	2	175	177	2		NA	NA	74	14	0	Col_3_5_1	0
Col	3	Col-0	1	5	25	9	25-Sep	2020	14/10/2020	NA	2	175	177	2		NA	NA	74	15	0	Col_3_5_1	0
Col	3	Col-0	1	5	25	9	25-Sep	2020	14/10/2020	NA	2	175	177	2		NA	NA	74	16	1	Col_3_5_1	0.564971751
Col	3	Col-0	1	5	25	9	25-Sep	2020	14/10/2020	NA	2	175	177	2		NA	NA	74	17	0	Col_3_5_1	0
Col	3	Col-0	1	5	25	9	25-Sep	2020	14/10/2020	NA	2	175	177	2		NA	NA	74	18	0	Col_3_5_1	0
Col	3	Col-0	1	5	25	9	25-Sep	2020	14/10/2020	NA	2	175	177	2		NA	NA	74	19	0	Col_3_5_1	0
Col	3	Col-0	5	5	25	9	25-Sep	2020	14/10/2020	NA	2	103	153	50		NA	NA	77	1	0	Col_3_5_5	0
Col	3	Col-0	5	5	25	9	25-Sep	2020	14/10/2020	NA	2	103	153	50		NA	NA	77	2	0	Col_3_5_5	0
Col	3	Col-0	5	5	25	9	25-Sep	2020	14/10/2020	NA	2	103	153	50		NA	NA	77	3	14	Col_3_5_5	9.150326797
Col	3	Col-0	5	5	25	9	25-Sep	2020	14/10/2020	NA	2	103	153	50		NA	NA	77	4	18	Col_3_5_5	11.76470588
Col	3	Col-0	5	5	25	9	25-Sep	2020	14/10/2020	NA	2	103	153	50		NA	NA	77	5	30	Col_3_5_5	19.60784314
Col	3	Col-0	5	5	25	9	25-Sep	2020	14/10/2020	NA	2	103	153	50		NA	NA	77	6	12	Col_3_5_5	7.843137255
Col	3	Col-0	5	5	25	9	25-Sep	2020	14/10/2020	NA	2	103	153	50		NA	NA	77	7	3	Col_3_5_5	1.960784314
Col	3	Col-0	5	5	25	9	25-Sep	2020	14/10/2020	NA	2	103	153	50		NA	NA	77	8	3	Col_3_5_5	1.960784314
Col	3	Col-0	5	5	25	9	25-Sep	2020	14/10/2020	NA	2	103	153	50		NA	NA	77	9	3	Col_3_5_5	1.960784314
Col	3	Col-0	5	5	25	9	25-Sep	2020	14/10/2020	NA	2	103	153	50		NA	NA	77	10	4	Col_3_5_5	2.614379085
Col	3	Col-0	5	5	25	9	25-Sep	2020	14/10/2020	NA	2	103	153	50		NA	NA	77	11	3	Col_3_5_5	1.960784314
Col	3	Col-0	5	5	25	9	25-Sep	2020	14/10/2020	NA	2	103	153	50		NA	NA	77	12	3	Col_3_5_5	1.960784314
Col	3	Col-0	5	5	25	9	25-Sep	2020	14/10/2020	NA	2	103	153	50		NA	NA	77	13	1	Col_3_5_5	0.653594771
Col	3	Col-0	5	5	25	9	25-Sep	2020	14/10/2020	NA	2	103	153	50		NA	NA	77	14	1	Col_3_5_5	0.653594771
Col	3	Col-0	5	5	25	9	25-Sep	2020	14/10/2020	NA	2	103	153	50		NA	NA	77	15	3	Col_3_5_5	1.960784314
Col	3	Col-0	5	5	25	9	25-Sep	2020	14/10/2020	NA	2	103	153	50		NA	NA	77	16	3	Col_3_5_5	1.960784314
Col	3	Col-0	5	5	25	9	25-Sep	2020	14/10/2020	NA	2	103	153	50		NA	NA	77	17	1	Col_3_5_5	0.653594771
Col	3	Col-0	5	5	25	9	25-Sep	2020	14/10/2020	NA	2	103	153	50		NA	NA	77	18	1	Col_3_5_5	0.653594771
Col	3	Col-0	5	5	25	9	25-Sep	2020	14/10/2020	NA	2	103	153	50		NA	NA	77	19	0	Col_3_5_5	0
Col	3	Col-0	10	5	25	9	25-Sep	2020	14/10/2020	NA	2	21	168	147		NA	NA	80	1	0	Col_3_5_10	0
Col	3	Col-0	10	5	25	9	25-Sep	2020	14/10/2020	NA	2	21	168	147		NA	NA	80	2	0	Col_3_5_10	0
Col	3	Col-0	10	5	25	9	25-Sep	2020	14/10/2020	NA	2	21	168	147		NA	NA	80	3	4	Col_3_5_10	2.380952381
Col	3	Col-0	10	5	25	9	25-Sep	2020	14/10/2020	NA	2	21	168	147		NA	NA	80	4	10	Col_3_5_10	5.952380952
Col	3	Col-0	10	5	25	9	25-Sep	2020	14/10/2020	NA	2	21	168	147		NA	NA	80	5	1	Col_3_5_10	0.595238095
Col	3	Col-0	10	5	25	9	25-Sep	2020	14/10/2020	NA	2	21	168	147		NA	NA	80	6	3	Col_3_5_10	1.785714286
Col	3	Col-0	10	5	25	9	25-Sep	2020	14/10/2020	NA	2	21	168	147		NA	NA	80	7	1	Col_3_5_10	0.595238095
Col	3	Col-0	10	5	25	9	25-Sep	2020	14/10/2020	NA	2	21	168	147		NA	NA	80	8	0	Col_3_5_10	0
Col	3	Col-0	10	5	25	9	25-Sep	2020	14/10/2020	NA	2	21	168	147		NA	NA	80	9	0	Col_3_5_10	0
Col	3	Col-0	10	5	25	9	25-Sep	2020	14/10/2020	NA	2	21	168	147		NA	NA	80	10	0	Col_3_5_10	0
Col	3	Col-0	10	5	25	9	25-Sep	2020	14/10/2020	NA	2	21	168	147		NA	NA	80	11	0	Col_3_5_10	0
Col	3	Col-0	10	5	25	9	25-Sep	2020	14/10/2020	NA	2	21	168	147		NA	NA	80	12	1	Col_3_5_10	0.595238095
Col	3	Col-0	10	5	25	9	25-Sep	2020	14/10/2020	NA	2	21	168	147		NA	NA	80	13	1	Col_3_5_10	0.595238095
Col	3	Col-0	10	5	25	9	25-Sep	2020	14/10/2020	NA	2	21	168	147		NA	NA	80	14	0	Col_3_5_10	0
Col	3	Col-0	10	5	25	9	25-Sep	2020	14/10/2020	NA	2	21	168	147		NA	NA	80	15	0	Col_3_5_10	0
Col	3	Col-0	10	5	25	9	25-Sep	2020	14/10/2020	NA	2	21	168	147		NA	NA	80	16	0	Col_3_5_10	0
Col	3	Col-0	10	5	25	9	25-Sep	2020	14/10/2020	NA	2	21	168	147		NA	NA	80	17	0	Col_3_5_10	0
Col	3	Col-0	10	5	25	9	25-Sep	2020	14/10/2020	NA	2	21	168	147		NA	NA	80	18	0	Col_3_5_10	0
Col	3	Col-0	10	5	25	9	25-Sep	2020	14/10/2020	NA	2	21	168	147		NA	NA	80	19	0	Col_3_5_10	0
Col	3	Col-0	0	8	5	11	05-Nov	2020	23/11/2020	NA	30	192	192	0		NA	NA	171	1	0	Col_3_8_0	0
Col	3	Col-0	0	8	5	11	05-Nov	2020	23/11/2020	NA	30	192	192	0		NA	NA	171	2	38	Col_3_8_0	19.79166667
Col	3	Col-0	0	8	5	11	05-Nov	2020	23/11/2020	NA	30	192	192	0		NA	NA	171	3	154	Col_3_8_0	80.20833333
Col	3	Col-0	0	8	5	11	05-Nov	2020	23/11/2020	NA	30	192	192	0		NA	NA	171	4	0	Col_3_8_0	0
Col	3	Col-0	0	8	5	11	05-Nov	2020	23/11/2020	NA	30	192	192	0		NA	NA	171	5	0	Col_3_8_0	0
Col	3	Col-0	0	8	5	11	05-Nov	2020	23/11/2020	NA	30	192	192	0		NA	NA	171	6	0	Col_3_8_0	0
Col	3	Col-0	0	8	5	11	05-Nov	2020	23/11/2020	NA	30	192	192	0		NA	NA	171	7	0	Col_3_8_0	0
Col	3	Col-0	0	8	5	11	05-Nov	2020	23/11/2020	NA	30	192	192	0		NA	NA	171	8	0	Col_3_8_0	0
Col	3	Col-0	0	8	5	11	05-Nov	2020	23/11/2020	NA	30	192	192	0		NA	NA	171	9	0	Col_3_8_0	0
Col	3	Col-0	0	8	5	11	05-Nov	2020	23/11/2020	NA	30	192	192	0		NA	NA	171	10	0	Col_3_8_0	0
Col	3	Col-0	0	8	5	11	05-Nov	2020	23/11/2020	NA	30	192	192	0		NA	NA	171	11	0	Col_3_8_0	0
Col	3	Col-0	0	8	5	11	05-Nov	2020	23/11/2020	NA	30	192	192	0		NA	NA	171	12	0	Col_3_8_0	0
Col	3	Col-0	0	8	5	11	05-Nov	2020	23/11/2020	NA	30	192	192	0		NA	NA	171	13	0	Col_3_8_0	0
Col	3	Col-0	0	8	5	11	05-Nov	2020	23/11/2020	NA	30	192	192	0		NA	NA	171	14	0	Col_3_8_0	0
Col	3	Col-0	0	8	5	11	05-Nov	2020	23/11/2020	NA	30	192	192	0		NA	NA	171	15	0	Col_3_8_0	0
Col	3	Col-0	0	8	5	11	05-Nov	2020	23/11/2020	NA	30	192	192	0		NA	NA	171	16	0	Col_3_8_0	0
Col	3	Col-0	0	8	5	11	05-Nov	2020	23/11/2020	NA	30	192	192	0		NA	NA	171	17	0	Col_3_8_0	0
Col	3	Col-0	0	8	5	11	05-Nov	2020	23/11/2020	NA	30	192	192	0		NA	NA	171	18	0	Col_3_8_0	0
Col	3	Col-0	1	8	5	11	05-Nov	2020	23/11/2020	NA	30	190	190	0		NA	NA	174	1	0	Col_3_8_1	0
Col	3	Col-0	1	8	5	11	05-Nov	2020	23/11/2020	NA	30	190	190	0		NA	NA	174	2	1	Col_3_8_1	0.526315789
Col	3	Col-0	1	8	5	11	05-Nov	2020	23/11/2020	NA	30	190	190	0		NA	NA	174	3	115	Col_3_8_1	60.52631579
Col	3	Col-0	1	8	5	11	05-Nov	2020	23/11/2020	NA	30	190	190	0		NA	NA	174	4	66	Col_3_8_1	34.73684211
Col	3	Col-0	1	8	5	11	05-Nov	2020	23/11/2020	NA	30	190	190	0		NA	NA	174	5	6	Col_3_8_1	3.157894737
Col	3	Col-0	1	8	5	11	05-Nov	2020	23/11/2020	NA	30	190	190	0		NA	NA	174	6	2	Col_3_8_1	1.052631579
Col	3	Col-0	1	8	5	11	05-Nov	2020	23/11/2020	NA	30	190	190	0		NA	NA	174	7	0	Col_3_8_1	0
Col	3	Col-0	1	8	5	11	05-Nov	2020	23/11/2020	NA	30	190	190	0		NA	NA	174	8	0	Col_3_8_1	0
Col	3	Col-0	1	8	5	11	05-Nov	2020	23/11/2020	NA	30	190	190	0		NA	NA	174	9	0	Col_3_8_1	0
Col	3	Col-0	1	8	5	11	05-Nov	2020	23/11/2020	NA	30	190	190	0		NA	NA	174	10	0	Col_3_8_1	0
Col	3	Col-0	1	8	5	11	05-Nov	2020	23/11/2020	NA	30	190	190	0		NA	NA	174	11	0	Col_3_8_1	0
Col	3	Col-0	1	8	5	11	05-Nov	2020	23/11/2020	NA	30	190	190	0		NA	NA	174	12	0	Col_3_8_1	0
Col	3	Col-0	1	8	5	11	05-Nov	2020	23/11/2020	NA	30	190	190	0		NA	NA	174	13	0	Col_3_8_1	0
Col	3	Col-0	1	8	5	11	05-Nov	2020	23/11/2020	NA	30	190	190	0		NA	NA	174	14	0	Col_3_8_1	0
Col	3	Col-0	1	8	5	11	05-Nov	2020	23/11/2020	NA	30	190	190	0		NA	NA	174	15	0	Col_3_8_1	0
Col	3	Col-0	1	8	5	11	05-Nov	2020	23/11/2020	NA	30	190	190	0		NA	NA	174	16	0	Col_3_8_1	0
Col	3	Col-0	1	8	5	11	05-Nov	2020	23/11/2020	NA	30	190	190	0		NA	NA	174	17	0	Col_3_8_1	0
Col	3	Col-0	1	8	5	11	05-Nov	2020	23/11/2020	NA	30	190	190	0		NA	NA	174	18	0	Col_3_8_1	0
Col	3	Col-0	5	8	5	11	05-Nov	2020	23/11/2020	NA	30	39	187	148		NA	NA	177	1	0	Col_3_8_5	0
Col	3	Col-0	5	8	5	11	05-Nov	2020	23/11/2020	NA	30	39	187	148		NA	NA	177	2	0	Col_3_8_5	0
Col	3	Col-0	5	8	5	11	05-Nov	2020	23/11/2020	NA	30	39	187	148		NA	NA	177	3	1	Col_3_8_5	0.534759358
Col	3	Col-0	5	8	5	11	05-Nov	2020	23/11/2020	NA	30	39	187	148		NA	NA	177	4	1	Col_3_8_5	0.534759358
Col	3	Col-0	5	8	5	11	05-Nov	2020	23/11/2020	NA	30	39	187	148		NA	NA	177	5	2	Col_3_8_5	1.069518717
Col	3	Col-0	5	8	5	11	05-Nov	2020	23/11/2020	NA	30	39	187	148		NA	NA	177	6	2	Col_3_8_5	1.069518717
Col	3	Col-0	5	8	5	11	05-Nov	2020	23/11/2020	NA	30	39	187	148		NA	NA	177	7	1	Col_3_8_5	0.534759358
Col	3	Col-0	5	8	5	11	05-Nov	2020	23/11/2020	NA	30	39	187	148		NA	NA	177	8	1	Col_3_8_5	0.534759358
Col	3	Col-0	5	8	5	11	05-Nov	2020	23/11/2020	NA	30	39	187	148		NA	NA	177	9	3	Col_3_8_5	1.604278075
Col	3	Col-0	5	8	5	11	05-Nov	2020	23/11/2020	NA	30	39	187	148		NA	NA	177	10	0	Col_3_8_5	0
Col	3	Col-0	5	8	5	11	05-Nov	2020	23/11/2020	NA	30	39	187	148		NA	NA	177	11	0	Col_3_8_5	0
Col	3	Col-0	5	8	5	11	05-Nov	2020	23/11/2020	NA	30	39	187	148		NA	NA	177	12	3	Col_3_8_5	1.604278075
Col	3	Col-0	5	8	5	11	05-Nov	2020	23/11/2020	NA	30	39	187	148		NA	NA	177	13	3	Col_3_8_5	1.604278075
Col	3	Col-0	5	8	5	11	05-Nov	2020	23/11/2020	NA	30	39	187	148		NA	NA	177	14	1	Col_3_8_5	0.534759358
Col	3	Col-0	5	8	5	11	05-Nov	2020	23/11/2020	NA	30	39	187	148		NA	NA	177	15	3	Col_3_8_5	1.604278075
Col	3	Col-0	5	8	5	11	05-Nov	2020	23/11/2020	NA	30	39	187	148		NA	NA	177	16	4	Col_3_8_5	2.139037433
Col	3	Col-0	5	8	5	11	05-Nov	2020	23/11/2020	NA	30	39	187	148		NA	NA	177	17	3	Col_3_8_5	1.604278075
Col	3	Col-0	5	8	5	11	05-Nov	2020	23/11/2020	NA	30	39	187	148		NA	NA	177	18	11	Col_3_8_5	5.882352941
Col	3	Col-0	10	8	5	11	05-Nov	2020	23/11/2020	NA	30	4	188	184		NA	NA	180	1	0	Col_3_8_10	0
Col	3	Col-0	10	8	5	11	05-Nov	2020	23/11/2020	NA	30	4	188	184		NA	NA	180	2	0	Col_3_8_10	0
Col	3	Col-0	10	8	5	11	05-Nov	2020	23/11/2020	NA	30	4	188	184		NA	NA	180	3	1	Col_3_8_10	0.531914894
Col	3	Col-0	10	8	5	11	05-Nov	2020	23/11/2020	NA	30	4	188	184		NA	NA	180	4	0	Col_3_8_10	0
Col	3	Col-0	10	8	5	11	05-Nov	2020	23/11/2020	NA	30	4	188	184		NA	NA	180	5	1	Col_3_8_10	0.531914894
Col	3	Col-0	10	8	5	11	05-Nov	2020	23/11/2020	NA	30	4	188	184		NA	NA	180	6	0	Col_3_8_10	0
Col	3	Col-0	10	8	5	11	05-Nov	2020	23/11/2020	NA	30	4	188	184		NA	NA	180	7	2	Col_3_8_10	1.063829787
Col	3	Col-0	10	8	5	11	05-Nov	2020	23/11/2020	NA	30	4	188	184		NA	NA	180	8	0	Col_3_8_10	0
Col	3	Col-0	10	8	5	11	05-Nov	2020	23/11/2020	NA	30	4	188	184		NA	NA	180	9	0	Col_3_8_10	0
Col	3	Col-0	10	8	5	11	05-Nov	2020	23/11/2020	NA	30	4	188	184		NA	NA	180	10	0	Col_3_8_10	0
Col	3	Col-0	10	8	5	11	05-Nov	2020	23/11/2020	NA	30	4	188	184		NA	NA	180	11	0	Col_3_8_10	0
Col	3	Col-0	10	8	5	11	05-Nov	2020	23/11/2020	NA	30	4	188	184		NA	NA	180	12	0	Col_3_8_10	0
Col	3	Col-0	10	8	5	11	05-Nov	2020	23/11/2020	NA	30	4	188	184		NA	NA	180	13	0	Col_3_8_10	0
Col	3	Col-0	10	8	5	11	05-Nov	2020	23/11/2020	NA	30	4	188	184		NA	NA	180	14	0	Col_3_8_10	0
Col	3	Col-0	10	8	5	11	05-Nov	2020	23/11/2020	NA	30	4	188	184		NA	NA	180	15	0	Col_3_8_10	0
Col	3	Col-0	10	8	5	11	05-Nov	2020	23/11/2020	NA	30	4	188	184		NA	NA	180	16	0	Col_3_8_10	0
Col	3	Col-0	10	8	5	11	05-Nov	2020	23/11/2020	NA	30	4	188	184		NA	NA	180	17	0	Col_3_8_10	0
Col	3	Col-0	10	8	5	11	05-Nov	2020	23/11/2020	NA	30	4	188	184		NA	NA	180	18	0	Col_3_8_10	0
Col	4	Col-0	5	2	NA	NA	05-Dec	2017	19-Dec	NA	1	56	117	61		NA	NA	21	1	0	Col_4_2_5	0
Col	4	Col-0	5	2	NA	NA	05-Dec	2017	19-Dec	NA	1	56	117	61		NA	NA	21	2	0	Col_4_2_5	0
Col	4	Col-0	5	2	NA	NA	05-Dec	2017	19-Dec	NA	1	56	117	61		NA	NA	21	3	0	Col_4_2_5	0
Col	4	Col-0	5	2	NA	NA	05-Dec	2017	19-Dec	NA	1	56	117	61		NA	NA	21	4	3	Col_4_2_5	2.564102564
Col	4	Col-0	5	2	NA	NA	05-Dec	2017	19-Dec	NA	1	56	117	61		NA	NA	21	5	0	Col_4_2_5	0
Col	4	Col-0	5	2	NA	NA	05-Dec	2017	19-Dec	NA	1	56	117	61		NA	NA	21	6	0	Col_4_2_5	0
Col	4	Col-0	5	2	NA	NA	05-Dec	2017	19-Dec	NA	1	56	117	61		NA	NA	21	7	40	Col_4_2_5	34.18803419
Col	4	Col-0	5	2	NA	NA	05-Dec	2017	19-Dec	NA	1	56	117	61		NA	NA	21	8	7	Col_4_2_5	5.982905983
Col	4	Col-0	5	2	NA	NA	05-Dec	2017	19-Dec	NA	1	56	117	61		NA	NA	21	9	1	Col_4_2_5	0.854700855
Col	4	Col-0	5	2	NA	NA	05-Dec	2017	19-Dec	NA	1	56	117	61		NA	NA	21	10	2	Col_4_2_5	1.709401709
Col	4	Col-0	5	2	NA	NA	05-Dec	2017	19-Dec	NA	1	56	117	61		NA	NA	21	11	1	Col_4_2_5	0.854700855
Col	4	Col-0	5	2	NA	NA	05-Dec	2017	19-Dec	NA	1	56	117	61		NA	NA	21	12	0	Col_4_2_5	0
Col	4	Col-0	5	2	NA	NA	05-Dec	2017	19-Dec	NA	1	56	117	61		NA	NA	21	13	0	Col_4_2_5	0
Col	4	Col-0	5	2	NA	NA	05-Dec	2017	19-Dec	NA	1	56	117	61		NA	NA	21	14	1	Col_4_2_5	0.854700855
Col	4	Col-0	5	2	NA	NA	05-Dec	2017	19-Dec	NA	1	56	117	61		NA	NA	21	15	1	Col_4_2_5	0.854700855
Col	4	Col-0	5	2	NA	NA	05-Dec	2017	19-Dec	NA	1	56	117	61		NA	NA	21	16	0	Col_4_2_5	0
Col	4	Col-0	5	2	NA	NA	05-Dec	2017	19-Dec	NA	1	56	117	61		NA	NA	21	17	0	Col_4_2_5	0
Col	4	Col-0	5	2	NA	NA	05-Dec	2017	19-Dec	NA	1	56	117	61		NA	NA	21	18	0	Col_4_2_5	0
Col	4+1	Col-0	0	2	NA	NA	05-Dec	2017	19-Dec	NA	1	118	118	0		NA	NA	24	1	0	Col_4+1_2_0	0
Col	4+1	Col-0	0	2	NA	NA	05-Dec	2017	19-Dec	NA	1	118	118	0		NA	NA	24	2	0	Col_4+1_2_0	0
Col	4+1	Col-0	0	2	NA	NA	05-Dec	2017	19-Dec	NA	1	118	118	0		NA	NA	24	3	95	Col_4+1_2_0	80.50847458
Col	4+1	Col-0	0	2	NA	NA	05-Dec	2017	19-Dec	NA	1	118	118	0		NA	NA	24	4	23	Col_4+1_2_0	19.49152542
Col	4+1	Col-0	0	2	NA	NA	05-Dec	2017	19-Dec	NA	1	118	118	0		NA	NA	24	5	0	Col_4+1_2_0	0
Col	4+1	Col-0	0	2	NA	NA	05-Dec	2017	19-Dec	NA	1	118	118	0		NA	NA	24	6	0	Col_4+1_2_0	0
Col	4+1	Col-0	0	2	NA	NA	05-Dec	2017	19-Dec	NA	1	118	118	0		NA	NA	24	7	0	Col_4+1_2_0	0
Col	4+1	Col-0	0	2	NA	NA	05-Dec	2017	19-Dec	NA	1	118	118	0		NA	NA	24	8	0	Col_4+1_2_0	0
Col	4+1	Col-0	0	2	NA	NA	05-Dec	2017	19-Dec	NA	1	118	118	0		NA	NA	24	9	0	Col_4+1_2_0	0
Col	4+1	Col-0	0	2	NA	NA	05-Dec	2017	19-Dec	NA	1	118	118	0		NA	NA	24	10	0	Col_4+1_2_0	0
Col	4+1	Col-0	0	2	NA	NA	05-Dec	2017	19-Dec	NA	1	118	118	0		NA	NA	24	11	0	Col_4+1_2_0	0
Col	4+1	Col-0	0	2	NA	NA	05-Dec	2017	19-Dec	NA	1	118	118	0		NA	NA	24	12	0	Col_4+1_2_0	0
Col	4+1	Col-0	0	2	NA	NA	05-Dec	2017	19-Dec	NA	1	118	118	0		NA	NA	24	13	0	Col_4+1_2_0	0
Col	4+1	Col-0	0	2	NA	NA	05-Dec	2017	19-Dec	NA	1	118	118	0		NA	NA	24	14	0	Col_4+1_2_0	0
Col	4+1	Col-0	0	2	NA	NA	05-Dec	2017	19-Dec	NA	1	118	118	0		NA	NA	24	15	0	Col_4+1_2_0	0
Col	4+1	Col-0	0	2	NA	NA	05-Dec	2017	19-Dec	NA	1	118	118	0		NA	NA	24	16	0	Col_4+1_2_0	0
Col	4+1	Col-0	0	2	NA	NA	05-Dec	2017	19-Dec	NA	1	118	118	0		NA	NA	24	17	0	Col_4+1_2_0	0
Col	4+1	Col-0	0	2	NA	NA	05-Dec	2017	19-Dec	NA	1	118	118	0		NA	NA	24	18	0	Col_4+1_2_0	0
Col	5	Col-0	0	2	NA	NA	05-Dec	2017	19-Dec	NA	1	102	102	0		NA	NA	22	1	0	Col_5_2_0	0
Col	5	Col-0	0	2	NA	NA	05-Dec	2017	19-Dec	NA	1	102	102	0		NA	NA	22	2	0	Col_5_2_0	0
Col	5	Col-0	0	2	NA	NA	05-Dec	2017	19-Dec	NA	1	102	102	0		NA	NA	22	3	75	Col_5_2_0	73.52941176
Col	5	Col-0	0	2	NA	NA	05-Dec	2017	19-Dec	NA	1	102	102	0		NA	NA	22	4	24	Col_5_2_0	23.52941176
Col	5	Col-0	0	2	NA	NA	05-Dec	2017	19-Dec	NA	1	102	102	0		NA	NA	22	5	3	Col_5_2_0	2.941176471
Col	5	Col-0	0	2	NA	NA	05-Dec	2017	19-Dec	NA	1	102	102	0		NA	NA	22	6	0	Col_5_2_0	0
Col	5	Col-0	0	2	NA	NA	05-Dec	2017	19-Dec	NA	1	102	102	0		NA	NA	22	7	0	Col_5_2_0	0
Col	5	Col-0	0	2	NA	NA	05-Dec	2017	19-Dec	NA	1	102	102	0		NA	NA	22	8	0	Col_5_2_0	0
Col	5	Col-0	0	2	NA	NA	05-Dec	2017	19-Dec	NA	1	102	102	0		NA	NA	22	9	0	Col_5_2_0	0
Col	5	Col-0	0	2	NA	NA	05-Dec	2017	19-Dec	NA	1	102	102	0		NA	NA	22	10	0	Col_5_2_0	0
Col	5	Col-0	0	2	NA	NA	05-Dec	2017	19-Dec	NA	1	102	102	0		NA	NA	22	11	0	Col_5_2_0	0
Col	5	Col-0	0	2	NA	NA	05-Dec	2017	19-Dec	NA	1	102	102	0		NA	NA	22	12	0	Col_5_2_0	0
Col	5	Col-0	0	2	NA	NA	05-Dec	2017	19-Dec	NA	1	102	102	0		NA	NA	22	13	0	Col_5_2_0	0
Col	5	Col-0	0	2	NA	NA	05-Dec	2017	19-Dec	NA	1	102	102	0		NA	NA	22	14	0	Col_5_2_0	0
Col	5	Col-0	0	2	NA	NA	05-Dec	2017	19-Dec	NA	1	102	102	0		NA	NA	22	15	0	Col_5_2_0	0
Col	5	Col-0	0	2	NA	NA	05-Dec	2017	19-Dec	NA	1	102	102	0		NA	NA	22	16	0	Col_5_2_0	0
Col	5	Col-0	0	2	NA	NA	05-Dec	2017	19-Dec	NA	1	102	102	0		NA	NA	22	17	0	Col_5_2_0	0
Col	5	Col-0	0	2	NA	NA	05-Dec	2017	19-Dec	NA	1	102	102	0		NA	NA	22	18	0	Col_5_2_0	0
Col	5	Col-0	5	2	NA	NA	05-Dec	2017	19-Dec	NA	1	25	101	76		NA	NA	23	1	0	Col_5_2_5	0
Col	5	Col-0	5	2	NA	NA	05-Dec	2017	19-Dec	NA	1	25	101	76		NA	NA	23	2	0	Col_5_2_5	0
Col	5	Col-0	5	2	NA	NA	05-Dec	2017	19-Dec	NA	1	25	101	76		NA	NA	23	3	0	Col_5_2_5	0
Col	5	Col-0	5	2	NA	NA	05-Dec	2017	19-Dec	NA	1	25	101	76		NA	NA	23	4	1	Col_5_2_5	0.99009901
Col	5	Col-0	5	2	NA	NA	05-Dec	2017	19-Dec	NA	1	25	101	76		NA	NA	23	5	0	Col_5_2_5	0
Col	5	Col-0	5	2	NA	NA	05-Dec	2017	19-Dec	NA	1	25	101	76		NA	NA	23	6	0	Col_5_2_5	0
Col	5	Col-0	5	2	NA	NA	05-Dec	2017	19-Dec	NA	1	25	101	76		NA	NA	23	7	23	Col_5_2_5	22.77227723
Col	5	Col-0	5	2	NA	NA	05-Dec	2017	19-Dec	NA	1	25	101	76		NA	NA	23	8	0	Col_5_2_5	0
Col	5	Col-0	5	2	NA	NA	05-Dec	2017	19-Dec	NA	1	25	101	76		NA	NA	23	9	0	Col_5_2_5	0
Col	5	Col-0	5	2	NA	NA	05-Dec	2017	19-Dec	NA	1	25	101	76		NA	NA	23	10	1	Col_5_2_5	0.99009901
Col	5	Col-0	5	2	NA	NA	05-Dec	2017	19-Dec	NA	1	25	101	76		NA	NA	23	11	0	Col_5_2_5	0
Col	5	Col-0	5	2	NA	NA	05-Dec	2017	19-Dec	NA	1	25	101	76		NA	NA	23	12	0	Col_5_2_5	0
Col	5	Col-0	5	2	NA	NA	05-Dec	2017	19-Dec	NA	1	25	101	76		NA	NA	23	13	0	Col_5_2_5	0
Col	5	Col-0	5	2	NA	NA	05-Dec	2017	19-Dec	NA	1	25	101	76		NA	NA	23	14	0	Col_5_2_5	0
Col	5	Col-0	5	2	NA	NA	05-Dec	2017	19-Dec	NA	1	25	101	76		NA	NA	23	15	0	Col_5_2_5	0
Col	5	Col-0	5	2	NA	NA	05-Dec	2017	19-Dec	NA	1	25	101	76		NA	NA	23	16	0	Col_5_2_5	0
Col	5	Col-0	5	2	NA	NA	05-Dec	2017	19-Dec	NA	1	25	101	76		NA	NA	23	17	0	Col_5_2_5	0
Col	5	Col-0	5	2	NA	NA	05-Dec	2017	19-Dec	NA	1	25	101	76		NA	NA	23	18	0	Col_5_2_5	0
Col-0	1	Col-0	0	6	9	10	10-Sep	2020	29/10/2020	NA	2	157	157	0		NA	NA	114	1	0	Col-0_1_6_0	0
Col-0	1	Col-0	0	6	9	10	10-Sep	2020	29/10/2020	NA	2	157	157	0		NA	NA	114	2	12	Col-0_1_6_0	7.643312102
Col-0	1	Col-0	0	6	9	10	10-Sep	2020	29/10/2020	NA	2	157	157	0		NA	NA	114	3	144	Col-0_1_6_0	91.71974522
Col-0	1	Col-0	0	6	9	10	10-Sep	2020	29/10/2020	NA	2	157	157	0		NA	NA	114	4	1	Col-0_1_6_0	0.636942675
Col-0	1	Col-0	0	6	9	10	10-Sep	2020	29/10/2020	NA	2	157	157	0		NA	NA	114	5	0	Col-0_1_6_0	0
Col-0	1	Col-0	0	6	9	10	10-Sep	2020	29/10/2020	NA	2	157	157	0		NA	NA	114	6	0	Col-0_1_6_0	0
Col-0	1	Col-0	0	6	9	10	10-Sep	2020	29/10/2020	NA	2	157	157	0		NA	NA	114	7	0	Col-0_1_6_0	0
Col-0	1	Col-0	0	6	9	10	10-Sep	2020	29/10/2020	NA	2	157	157	0		NA	NA	114	8	0	Col-0_1_6_0	0
Col-0	1	Col-0	0	6	9	10	10-Sep	2020	29/10/2020	NA	2	157	157	0		NA	NA	114	9	0	Col-0_1_6_0	0
Col-0	1	Col-0	0	6	9	10	10-Sep	2020	29/10/2020	NA	2	157	157	0		NA	NA	114	10	0	Col-0_1_6_0	0
Col-0	1	Col-0	0	6	9	10	10-Sep	2020	29/10/2020	NA	2	157	157	0		NA	NA	114	11	0	Col-0_1_6_0	0
Col-0	1	Col-0	0	6	9	10	10-Sep	2020	29/10/2020	NA	2	157	157	0		NA	NA	114	12	0	Col-0_1_6_0	0
Col-0	1	Col-0	0	6	9	10	10-Sep	2020	29/10/2020	NA	2	157	157	0		NA	NA	114	13	0	Col-0_1_6_0	0
Col-0	1	Col-0	0	6	9	10	10-Sep	2020	29/10/2020	NA	2	157	157	0		NA	NA	114	14	0	Col-0_1_6_0	0
Col-0	1	Col-0	0	6	9	10	10-Sep	2020	29/10/2020	NA	2	157	157	0		NA	NA	114	15	0	Col-0_1_6_0	0
Col-0	1	Col-0	0	6	9	10	10-Sep	2020	29/10/2020	NA	2	157	157	0		NA	NA	114	16	0	Col-0_1_6_0	0
Col-0	1	Col-0	0	6	9	10	10-Sep	2020	29/10/2020	NA	2	157	157	0		NA	NA	114	17	0	Col-0_1_6_0	0
Col-0	1	Col-0	0	6	9	10	10-Sep	2020	29/10/2020	NA	2	157	157	0		NA	NA	114	18	0	Col-0_1_6_0	0
Col-0	1	Col-0	0	6	9	10	10-Sep	2020	29/10/2020	NA	2	157	157	0		NA	NA	114	19	0	Col-0_1_6_0	0
Col-0	1	Col-0	1	6	9	10	10-Sep	2020	29/10/2020	NA	2	165	166	1		NA	NA	112	1	0	Col-0_1_6_1	0
Col-0	1	Col-0	1	6	9	10	10-Sep	2020	29/10/2020	NA	2	165	166	1		NA	NA	112	2	0	Col-0_1_6_1	0
Col-0	1	Col-0	1	6	9	10	10-Sep	2020	29/10/2020	NA	2	165	166	1		NA	NA	112	3	18	Col-0_1_6_1	10.84337349
Col-0	1	Col-0	1	6	9	10	10-Sep	2020	29/10/2020	NA	2	165	166	1		NA	NA	112	4	109	Col-0_1_6_1	65.6626506
Col-0	1	Col-0	1	6	9	10	10-Sep	2020	29/10/2020	NA	2	165	166	1		NA	NA	112	5	36	Col-0_1_6_1	21.68674699
Col-0	1	Col-0	1	6	9	10	10-Sep	2020	29/10/2020	NA	2	165	166	1		NA	NA	112	6	1	Col-0_1_6_1	0.602409639
Col-0	1	Col-0	1	6	9	10	10-Sep	2020	29/10/2020	NA	2	165	166	1		NA	NA	112	7	1	Col-0_1_6_1	0.602409639
Col-0	1	Col-0	1	6	9	10	10-Sep	2020	29/10/2020	NA	2	165	166	1		NA	NA	112	8	0	Col-0_1_6_1	0
Col-0	1	Col-0	1	6	9	10	10-Sep	2020	29/10/2020	NA	2	165	166	1		NA	NA	112	9	0	Col-0_1_6_1	0
Col-0	1	Col-0	1	6	9	10	10-Sep	2020	29/10/2020	NA	2	165	166	1		NA	NA	112	10	0	Col-0_1_6_1	0
Col-0	1	Col-0	1	6	9	10	10-Sep	2020	29/10/2020	NA	2	165	166	1		NA	NA	112	11	0	Col-0_1_6_1	0
Col-0	1	Col-0	1	6	9	10	10-Sep	2020	29/10/2020	NA	2	165	166	1		NA	NA	112	12	0	Col-0_1_6_1	0
Col-0	1	Col-0	1	6	9	10	10-Sep	2020	29/10/2020	NA	2	165	166	1		NA	NA	112	13	0	Col-0_1_6_1	0
Col-0	1	Col-0	1	6	9	10	10-Sep	2020	29/10/2020	NA	2	165	166	1		NA	NA	112	14	0	Col-0_1_6_1	0
Col-0	1	Col-0	1	6	9	10	10-Sep	2020	29/10/2020	NA	2	165	166	1		NA	NA	112	15	0	Col-0_1_6_1	0
Col-0	1	Col-0	1	6	9	10	10-Sep	2020	29/10/2020	NA	2	165	166	1		NA	NA	112	16	0	Col-0_1_6_1	0
Col-0	1	Col-0	1	6	9	10	10-Sep	2020	29/10/2020	NA	2	165	166	1		NA	NA	112	17	0	Col-0_1_6_1	0
Col-0	1	Col-0	1	6	9	10	10-Sep	2020	29/10/2020	NA	2	165	166	1		NA	NA	112	18	0	Col-0_1_6_1	0
Col-0	1	Col-0	1	6	9	10	10-Sep	2020	29/10/2020	NA	2	165	166	1		NA	NA	112	19	0	Col-0_1_6_1	0
Col-0	1	Col-0	5	6	9	10	10-Sep	2020	29/10/2020	NA	2	50	171	121		NA	NA	105	1	0	Col-0_1_6_5	0
Col-0	1	Col-0	5	6	9	10	10-Sep	2020	29/10/2020	NA	2	50	171	121		NA	NA	105	2	0	Col-0_1_6_5	0
Col-0	1	Col-0	5	6	9	10	10-Sep	2020	29/10/2020	NA	2	50	171	121		NA	NA	105	3	1	Col-0_1_6_5	0.584795322
Col-0	1	Col-0	5	6	9	10	10-Sep	2020	29/10/2020	NA	2	50	171	121		NA	NA	105	4	10	Col-0_1_6_5	5.847953216
Col-0	1	Col-0	5	6	9	10	10-Sep	2020	29/10/2020	NA	2	50	171	121		NA	NA	105	5	10	Col-0_1_6_5	5.847953216
Col-0	1	Col-0	5	6	9	10	10-Sep	2020	29/10/2020	NA	2	50	171	121		NA	NA	105	6	7	Col-0_1_6_5	4.093567251
Col-0	1	Col-0	5	6	9	10	10-Sep	2020	29/10/2020	NA	2	50	171	121		NA	NA	105	7	1	Col-0_1_6_5	0.584795322
Col-0	1	Col-0	5	6	9	10	10-Sep	2020	29/10/2020	NA	2	50	171	121		NA	NA	105	8	1	Col-0_1_6_5	0.584795322
Col-0	1	Col-0	5	6	9	10	10-Sep	2020	29/10/2020	NA	2	50	171	121		NA	NA	105	9	4	Col-0_1_6_5	2.339181287
Col-0	1	Col-0	5	6	9	10	10-Sep	2020	29/10/2020	NA	2	50	171	121		NA	NA	105	10	3	Col-0_1_6_5	1.754385965
Col-0	1	Col-0	5	6	9	10	10-Sep	2020	29/10/2020	NA	2	50	171	121		NA	NA	105	11	1	Col-0_1_6_5	0.584795322
Col-0	1	Col-0	5	6	9	10	10-Sep	2020	29/10/2020	NA	2	50	171	121		NA	NA	105	12	1	Col-0_1_6_5	0.584795322
Col-0	1	Col-0	5	6	9	10	10-Sep	2020	29/10/2020	NA	2	50	171	121		NA	NA	105	13	3	Col-0_1_6_5	1.754385965
Col-0	1	Col-0	5	6	9	10	10-Sep	2020	29/10/2020	NA	2	50	171	121		NA	NA	105	14	1	Col-0_1_6_5	0.584795322
Col-0	1	Col-0	5	6	9	10	10-Sep	2020	29/10/2020	NA	2	50	171	121		NA	NA	105	15	1	Col-0_1_6_5	0.584795322
Col-0	1	Col-0	5	6	9	10	10-Sep	2020	29/10/2020	NA	2	50	171	121		NA	NA	105	16	0	Col-0_1_6_5	0
Col-0	1	Col-0	5	6	9	10	10-Sep	2020	29/10/2020	NA	2	50	171	121		NA	NA	105	17	4	Col-0_1_6_5	2.339181287
Col-0	1	Col-0	5	6	9	10	10-Sep	2020	29/10/2020	NA	2	50	171	121		NA	NA	105	18	0	Col-0_1_6_5	0
Col-0	1	Col-0	5	6	9	10	10-Sep	2020	29/10/2020	NA	2	50	171	121		NA	NA	105	19	2	Col-0_1_6_5	1.169590643
Col-0	1	Col-0	10	6	9	10	10-Sep	2020	29/10/2020	NA	2	3	174	171		NA	NA	113	1	0	Col-0_1_6_10	0
Col-0	1	Col-0	10	6	9	10	10-Sep	2020	29/10/2020	NA	2	3	174	171		NA	NA	113	2	0	Col-0_1_6_10	0
Col-0	1	Col-0	10	6	9	10	10-Sep	2020	29/10/2020	NA	2	3	174	171		NA	NA	113	3	0	Col-0_1_6_10	0
Col-0	1	Col-0	10	6	9	10	10-Sep	2020	29/10/2020	NA	2	3	174	171		NA	NA	113	4	1	Col-0_1_6_10	0.574712644
Col-0	1	Col-0	10	6	9	10	10-Sep	2020	29/10/2020	NA	2	3	174	171		NA	NA	113	5	1	Col-0_1_6_10	0.574712644
Col-0	1	Col-0	10	6	9	10	10-Sep	2020	29/10/2020	NA	2	3	174	171		NA	NA	113	6	0	Col-0_1_6_10	0
Col-0	1	Col-0	10	6	9	10	10-Sep	2020	29/10/2020	NA	2	3	174	171		NA	NA	113	7	0	Col-0_1_6_10	0
Col-0	1	Col-0	10	6	9	10	10-Sep	2020	29/10/2020	NA	2	3	174	171		NA	NA	113	8	1	Col-0_1_6_10	0.574712644
Col-0	1	Col-0	10	6	9	10	10-Sep	2020	29/10/2020	NA	2	3	174	171		NA	NA	113	9	0	Col-0_1_6_10	0
Col-0	1	Col-0	10	6	9	10	10-Sep	2020	29/10/2020	NA	2	3	174	171		NA	NA	113	10	0	Col-0_1_6_10	0
Col-0	1	Col-0	10	6	9	10	10-Sep	2020	29/10/2020	NA	2	3	174	171		NA	NA	113	11	0	Col-0_1_6_10	0
Col-0	1	Col-0	10	6	9	10	10-Sep	2020	29/10/2020	NA	2	3	174	171		NA	NA	113	12	0	Col-0_1_6_10	0
Col-0	1	Col-0	10	6	9	10	10-Sep	2020	29/10/2020	NA	2	3	174	171		NA	NA	113	13	0	Col-0_1_6_10	0
Col-0	1	Col-0	10	6	9	10	10-Sep	2020	29/10/2020	NA	2	3	174	171		NA	NA	113	14	0	Col-0_1_6_10	0
Col-0	1	Col-0	10	6	9	10	10-Sep	2020	29/10/2020	NA	2	3	174	171		NA	NA	113	15	0	Col-0_1_6_10	0
Col-0	1	Col-0	10	6	9	10	10-Sep	2020	29/10/2020	NA	2	3	174	171		NA	NA	113	16	0	Col-0_1_6_10	0
Col-0	1	Col-0	10	6	9	10	10-Sep	2020	29/10/2020	NA	2	3	174	171		NA	NA	113	17	0	Col-0_1_6_10	0
Col-0	1	Col-0	10	6	9	10	10-Sep	2020	29/10/2020	NA	2	3	174	171		NA	NA	113	18	0	Col-0_1_6_10	0
Col-0	1	Col-0	10	6	9	10	10-Sep	2020	29/10/2020	NA	2	3	174	171		NA	NA	113	19	0	Col-0_1_6_10	0
Col-0	1	Col-0	0	9	16	11	16-Nov	2020	04/12/2020	NA	30	153	154	1		NA	NA	193	1	0	Col-0_1_9_0	0
Col-0	1	Col-0	0	9	16	11	16-Nov	2020	04/12/2020	NA	30	153	154	1		NA	NA	193	2	1	Col-0_1_9_0	0.649350649
Col-0	1	Col-0	0	9	16	11	16-Nov	2020	04/12/2020	NA	30	153	154	1		NA	NA	193	3	140	Col-0_1_9_0	90.90909091
Col-0	1	Col-0	0	9	16	11	16-Nov	2020	04/12/2020	NA	30	153	154	1		NA	NA	193	4	5	Col-0_1_9_0	3.246753247
Col-0	1	Col-0	0	9	16	11	16-Nov	2020	04/12/2020	NA	30	153	154	1		NA	NA	193	5	6	Col-0_1_9_0	3.896103896
Col-0	1	Col-0	0	9	16	11	16-Nov	2020	04/12/2020	NA	30	153	154	1		NA	NA	193	6	1	Col-0_1_9_0	0.649350649
Col-0	1	Col-0	0	9	16	11	16-Nov	2020	04/12/2020	NA	30	153	154	1		NA	NA	193	7	0	Col-0_1_9_0	0
Col-0	1	Col-0	0	9	16	11	16-Nov	2020	04/12/2020	NA	30	153	154	1		NA	NA	193	8	0	Col-0_1_9_0	0
Col-0	1	Col-0	0	9	16	11	16-Nov	2020	04/12/2020	NA	30	153	154	1		NA	NA	193	9	0	Col-0_1_9_0	0
Col-0	1	Col-0	0	9	16	11	16-Nov	2020	04/12/2020	NA	30	153	154	1		NA	NA	193	10	0	Col-0_1_9_0	0
Col-0	1	Col-0	0	9	16	11	16-Nov	2020	04/12/2020	NA	30	153	154	1		NA	NA	193	11	0	Col-0_1_9_0	0
Col-0	1	Col-0	0	9	16	11	16-Nov	2020	04/12/2020	NA	30	153	154	1		NA	NA	193	12	0	Col-0_1_9_0	0
Col-0	1	Col-0	0	9	16	11	16-Nov	2020	04/12/2020	NA	30	153	154	1		NA	NA	193	13	0	Col-0_1_9_0	0
Col-0	1	Col-0	0	9	16	11	16-Nov	2020	04/12/2020	NA	30	153	154	1		NA	NA	193	14	0	Col-0_1_9_0	0
Col-0	1	Col-0	0	9	16	11	16-Nov	2020	04/12/2020	NA	30	153	154	1		NA	NA	193	15	0	Col-0_1_9_0	0
Col-0	1	Col-0	0	9	16	11	16-Nov	2020	04/12/2020	NA	30	153	154	1		NA	NA	193	16	0	Col-0_1_9_0	0
Col-0	1	Col-0	0	9	16	11	16-Nov	2020	04/12/2020	NA	30	153	154	1		NA	NA	193	17	0	Col-0_1_9_0	0
Col-0	1	Col-0	0	9	16	11	16-Nov	2020	04/12/2020	NA	30	153	154	1		NA	NA	193	18	0	Col-0_1_9_0	0
Col-0	1	Col-0	1	9	16	11	16-Nov	2020	04/12/2020	NA	30	158	164	6		NA	NA	200	1	0	Col-0_1_9_1	0
Col-0	1	Col-0	1	9	16	11	16-Nov	2020	04/12/2020	NA	30	158	164	6		NA	NA	200	2	0	Col-0_1_9_1	0
Col-0	1	Col-0	1	9	16	11	16-Nov	2020	04/12/2020	NA	30	158	164	6		NA	NA	200	3	64	Col-0_1_9_1	39.02439024
Col-0	1	Col-0	1	9	16	11	16-Nov	2020	04/12/2020	NA	30	158	164	6		NA	NA	200	4	76	Col-0_1_9_1	46.34146341
Col-0	1	Col-0	1	9	16	11	16-Nov	2020	04/12/2020	NA	30	158	164	6		NA	NA	200	5	4	Col-0_1_9_1	2.43902439
Col-0	1	Col-0	1	9	16	11	16-Nov	2020	04/12/2020	NA	30	158	164	6		NA	NA	200	6	1	Col-0_1_9_1	0.609756098
Col-0	1	Col-0	1	9	16	11	16-Nov	2020	04/12/2020	NA	30	158	164	6		NA	NA	200	7	2	Col-0_1_9_1	1.219512195
Col-0	1	Col-0	1	9	16	11	16-Nov	2020	04/12/2020	NA	30	158	164	6		NA	NA	200	8	0	Col-0_1_9_1	0
Col-0	1	Col-0	1	9	16	11	16-Nov	2020	04/12/2020	NA	30	158	164	6		NA	NA	200	9	2	Col-0_1_9_1	1.219512195
Col-0	1	Col-0	1	9	16	11	16-Nov	2020	04/12/2020	NA	30	158	164	6		NA	NA	200	10	0	Col-0_1_9_1	0
Col-0	1	Col-0	1	9	16	11	16-Nov	2020	04/12/2020	NA	30	158	164	6		NA	NA	200	11	6	Col-0_1_9_1	3.658536585
Col-0	1	Col-0	1	9	16	11	16-Nov	2020	04/12/2020	NA	30	158	164	6		NA	NA	200	12	0	Col-0_1_9_1	0
Col-0	1	Col-0	1	9	16	11	16-Nov	2020	04/12/2020	NA	30	158	164	6		NA	NA	200	13	0	Col-0_1_9_1	0
Col-0	1	Col-0	1	9	16	11	16-Nov	2020	04/12/2020	NA	30	158	164	6		NA	NA	200	14	1	Col-0_1_9_1	0.609756098
Col-0	1	Col-0	1	9	16	11	16-Nov	2020	04/12/2020	NA	30	158	164	6		NA	NA	200	15	0	Col-0_1_9_1	0
Col-0	1	Col-0	1	9	16	11	16-Nov	2020	04/12/2020	NA	30	158	164	6		NA	NA	200	16	1	Col-0_1_9_1	0.609756098
Col-0	1	Col-0	1	9	16	11	16-Nov	2020	04/12/2020	NA	30	158	164	6		NA	NA	200	17	0	Col-0_1_9_1	0
Col-0	1	Col-0	1	9	16	11	16-Nov	2020	04/12/2020	NA	30	158	164	6		NA	NA	200	18	1	Col-0_1_9_1	0.609756098
Col-0	1	Col-0	5	9	16	11	16-Nov	2020	04/12/2020	NA	30	24	169	145		NA	NA	205	1	0	Col-0_1_9_5	0
Col-0	1	Col-0	5	9	16	11	16-Nov	2020	04/12/2020	NA	30	24	169	145		NA	NA	205	2	0	Col-0_1_9_5	0
Col-0	1	Col-0	5	9	16	11	16-Nov	2020	04/12/2020	NA	30	24	169	145		NA	NA	205	3	0	Col-0_1_9_5	0
Col-0	1	Col-0	5	9	16	11	16-Nov	2020	04/12/2020	NA	30	24	169	145		NA	NA	205	4	1	Col-0_1_9_5	0.591715976
Col-0	1	Col-0	5	9	16	11	16-Nov	2020	04/12/2020	NA	30	24	169	145		NA	NA	205	5	2	Col-0_1_9_5	1.183431953
Col-0	1	Col-0	5	9	16	11	16-Nov	2020	04/12/2020	NA	30	24	169	145		NA	NA	205	6	1	Col-0_1_9_5	0.591715976
Col-0	1	Col-0	5	9	16	11	16-Nov	2020	04/12/2020	NA	30	24	169	145		NA	NA	205	7	0	Col-0_1_9_5	0
Col-0	1	Col-0	5	9	16	11	16-Nov	2020	04/12/2020	NA	30	24	169	145		NA	NA	205	8	3	Col-0_1_9_5	1.775147929
Col-0	1	Col-0	5	9	16	11	16-Nov	2020	04/12/2020	NA	30	24	169	145		NA	NA	205	9	2	Col-0_1_9_5	1.183431953
Col-0	1	Col-0	5	9	16	11	16-Nov	2020	04/12/2020	NA	30	24	169	145		NA	NA	205	10	0	Col-0_1_9_5	0
Col-0	1	Col-0	5	9	16	11	16-Nov	2020	04/12/2020	NA	30	24	169	145		NA	NA	205	11	2	Col-0_1_9_5	1.183431953
Col-0	1	Col-0	5	9	16	11	16-Nov	2020	04/12/2020	NA	30	24	169	145		NA	NA	205	12	2	Col-0_1_9_5	1.183431953
Col-0	1	Col-0	5	9	16	11	16-Nov	2020	04/12/2020	NA	30	24	169	145		NA	NA	205	13	1	Col-0_1_9_5	0.591715976
Col-0	1	Col-0	5	9	16	11	16-Nov	2020	04/12/2020	NA	30	24	169	145		NA	NA	205	14	1	Col-0_1_9_5	0.591715976
Col-0	1	Col-0	5	9	16	11	16-Nov	2020	04/12/2020	NA	30	24	169	145		NA	NA	205	15	0	Col-0_1_9_5	0
Col-0	1	Col-0	5	9	16	11	16-Nov	2020	04/12/2020	NA	30	24	169	145		NA	NA	205	16	2	Col-0_1_9_5	1.183431953
Col-0	1	Col-0	5	9	16	11	16-Nov	2020	04/12/2020	NA	30	24	169	145		NA	NA	205	17	4	Col-0_1_9_5	2.366863905
Col-0	1	Col-0	5	9	16	11	16-Nov	2020	04/12/2020	NA	30	24	169	145		NA	NA	205	18	3	Col-0_1_9_5	1.775147929
Col-0	1	Col-0	10	9	16	11	16-Nov	2020	04/12/2020	NA	30	0	188	188		NA	NA	213	1	0	Col-0_1_9_10	0
Col-0	1	Col-0	10	9	16	11	16-Nov	2020	04/12/2020	NA	30	0	188	188		NA	NA	213	2	0	Col-0_1_9_10	0
Col-0	1	Col-0	10	9	16	11	16-Nov	2020	04/12/2020	NA	30	0	188	188		NA	NA	213	3	0	Col-0_1_9_10	0
Col-0	1	Col-0	10	9	16	11	16-Nov	2020	04/12/2020	NA	30	0	188	188		NA	NA	213	4	0	Col-0_1_9_10	0
Col-0	1	Col-0	10	9	16	11	16-Nov	2020	04/12/2020	NA	30	0	188	188		NA	NA	213	5	0	Col-0_1_9_10	0
Col-0	1	Col-0	10	9	16	11	16-Nov	2020	04/12/2020	NA	30	0	188	188		NA	NA	213	6	0	Col-0_1_9_10	0
Col-0	1	Col-0	10	9	16	11	16-Nov	2020	04/12/2020	NA	30	0	188	188		NA	NA	213	7	0	Col-0_1_9_10	0
Col-0	1	Col-0	10	9	16	11	16-Nov	2020	04/12/2020	NA	30	0	188	188		NA	NA	213	8	0	Col-0_1_9_10	0
Col-0	1	Col-0	10	9	16	11	16-Nov	2020	04/12/2020	NA	30	0	188	188		NA	NA	213	9	0	Col-0_1_9_10	0
Col-0	1	Col-0	10	9	16	11	16-Nov	2020	04/12/2020	NA	30	0	188	188		NA	NA	213	10	0	Col-0_1_9_10	0
Col-0	1	Col-0	10	9	16	11	16-Nov	2020	04/12/2020	NA	30	0	188	188		NA	NA	213	11	0	Col-0_1_9_10	0
Col-0	1	Col-0	10	9	16	11	16-Nov	2020	04/12/2020	NA	30	0	188	188		NA	NA	213	12	0	Col-0_1_9_10	0
Col-0	1	Col-0	10	9	16	11	16-Nov	2020	04/12/2020	NA	30	0	188	188		NA	NA	213	13	0	Col-0_1_9_10	0
Col-0	1	Col-0	10	9	16	11	16-Nov	2020	04/12/2020	NA	30	0	188	188		NA	NA	213	14	0	Col-0_1_9_10	0
Col-0	1	Col-0	10	9	16	11	16-Nov	2020	04/12/2020	NA	30	0	188	188		NA	NA	213	15	0	Col-0_1_9_10	0
Col-0	1	Col-0	10	9	16	11	16-Nov	2020	04/12/2020	NA	30	0	188	188		NA	NA	213	16	0	Col-0_1_9_10	0
Col-0	1	Col-0	10	9	16	11	16-Nov	2020	04/12/2020	NA	30	0	188	188		NA	NA	213	17	0	Col-0_1_9_10	0
Col-0	1	Col-0	10	9	16	11	16-Nov	2020	04/12/2020	NA	30	0	188	188		NA	NA	213	18	0	Col-0_1_9_10	0
Col-0	2	Col-0	0	6	9	10	10-Sep	2020	29/10/2020	NA	2	174	174	0		NA	NA	115	1	0	Col-0_2_6_0	0
Col-0	2	Col-0	0	6	9	10	10-Sep	2020	29/10/2020	NA	2	174	174	0		NA	NA	115	2	29	Col-0_2_6_0	16.66666667
Col-0	2	Col-0	0	6	9	10	10-Sep	2020	29/10/2020	NA	2	174	174	0		NA	NA	115	3	144	Col-0_2_6_0	82.75862069
Col-0	2	Col-0	0	6	9	10	10-Sep	2020	29/10/2020	NA	2	174	174	0		NA	NA	115	4	1	Col-0_2_6_0	0.574712644
Col-0	2	Col-0	0	6	9	10	10-Sep	2020	29/10/2020	NA	2	174	174	0		NA	NA	115	5	0	Col-0_2_6_0	0
Col-0	2	Col-0	0	6	9	10	10-Sep	2020	29/10/2020	NA	2	174	174	0		NA	NA	115	6	0	Col-0_2_6_0	0
Col-0	2	Col-0	0	6	9	10	10-Sep	2020	29/10/2020	NA	2	174	174	0		NA	NA	115	7	0	Col-0_2_6_0	0
Col-0	2	Col-0	0	6	9	10	10-Sep	2020	29/10/2020	NA	2	174	174	0		NA	NA	115	8	0	Col-0_2_6_0	0
Col-0	2	Col-0	0	6	9	10	10-Sep	2020	29/10/2020	NA	2	174	174	0		NA	NA	115	9	0	Col-0_2_6_0	0
Col-0	2	Col-0	0	6	9	10	10-Sep	2020	29/10/2020	NA	2	174	174	0		NA	NA	115	10	0	Col-0_2_6_0	0
Col-0	2	Col-0	0	6	9	10	10-Sep	2020	29/10/2020	NA	2	174	174	0		NA	NA	115	11	0	Col-0_2_6_0	0
Col-0	2	Col-0	0	6	9	10	10-Sep	2020	29/10/2020	NA	2	174	174	0		NA	NA	115	12	0	Col-0_2_6_0	0
Col-0	2	Col-0	0	6	9	10	10-Sep	2020	29/10/2020	NA	2	174	174	0		NA	NA	115	13	0	Col-0_2_6_0	0
Col-0	2	Col-0	0	6	9	10	10-Sep	2020	29/10/2020	NA	2	174	174	0		NA	NA	115	14	0	Col-0_2_6_0	0
Col-0	2	Col-0	0	6	9	10	10-Sep	2020	29/10/2020	NA	2	174	174	0		NA	NA	115	15	0	Col-0_2_6_0	0
Col-0	2	Col-0	0	6	9	10	10-Sep	2020	29/10/2020	NA	2	174	174	0		NA	NA	115	16	0	Col-0_2_6_0	0
Col-0	2	Col-0	0	6	9	10	10-Sep	2020	29/10/2020	NA	2	174	174	0		NA	NA	115	17	0	Col-0_2_6_0	0
Col-0	2	Col-0	0	6	9	10	10-Sep	2020	29/10/2020	NA	2	174	174	0		NA	NA	115	18	0	Col-0_2_6_0	0
Col-0	2	Col-0	0	6	9	10	10-Sep	2020	29/10/2020	NA	2	174	174	0		NA	NA	115	19	0	Col-0_2_6_0	0
Col-0	2	Col-0	1	6	9	10	10-Sep	2020	29/10/2020	NA	2	154	159	5		NA	NA	108	1	0	Col-0_2_6_1	0
Col-0	2	Col-0	1	6	9	10	10-Sep	2020	29/10/2020	NA	2	154	159	5		NA	NA	108	2	1	Col-0_2_6_1	0.628930818
Col-0	2	Col-0	1	6	9	10	10-Sep	2020	29/10/2020	NA	2	154	159	5		NA	NA	108	3	50	Col-0_2_6_1	31.44654088
Col-0	2	Col-0	1	6	9	10	10-Sep	2020	29/10/2020	NA	2	154	159	5		NA	NA	108	4	83	Col-0_2_6_1	52.20125786
Col-0	2	Col-0	1	6	9	10	10-Sep	2020	29/10/2020	NA	2	154	159	5		NA	NA	108	5	17	Col-0_2_6_1	10.6918239
Col-0	2	Col-0	1	6	9	10	10-Sep	2020	29/10/2020	NA	2	154	159	5		NA	NA	108	6	1	Col-0_2_6_1	0.628930818
Col-0	2	Col-0	1	6	9	10	10-Sep	2020	29/10/2020	NA	2	154	159	5		NA	NA	108	7	1	Col-0_2_6_1	0.628930818
Col-0	2	Col-0	1	6	9	10	10-Sep	2020	29/10/2020	NA	2	154	159	5		NA	NA	108	8	1	Col-0_2_6_1	0.628930818
Col-0	2	Col-0	1	6	9	10	10-Sep	2020	29/10/2020	NA	2	154	159	5		NA	NA	108	9	0	Col-0_2_6_1	0
Col-0	2	Col-0	1	6	9	10	10-Sep	2020	29/10/2020	NA	2	154	159	5		NA	NA	108	10	0	Col-0_2_6_1	0
Col-0	2	Col-0	1	6	9	10	10-Sep	2020	29/10/2020	NA	2	154	159	5		NA	NA	108	11	0	Col-0_2_6_1	0
Col-0	2	Col-0	1	6	9	10	10-Sep	2020	29/10/2020	NA	2	154	159	5		NA	NA	108	12	0	Col-0_2_6_1	0
Col-0	2	Col-0	1	6	9	10	10-Sep	2020	29/10/2020	NA	2	154	159	5		NA	NA	108	13	0	Col-0_2_6_1	0
Col-0	2	Col-0	1	6	9	10	10-Sep	2020	29/10/2020	NA	2	154	159	5		NA	NA	108	14	0	Col-0_2_6_1	0
Col-0	2	Col-0	1	6	9	10	10-Sep	2020	29/10/2020	NA	2	154	159	5		NA	NA	108	15	0	Col-0_2_6_1	0
Col-0	2	Col-0	1	6	9	10	10-Sep	2020	29/10/2020	NA	2	154	159	5		NA	NA	108	16	0	Col-0_2_6_1	0
Col-0	2	Col-0	1	6	9	10	10-Sep	2020	29/10/2020	NA	2	154	159	5		NA	NA	108	17	0	Col-0_2_6_1	0
Col-0	2	Col-0	1	6	9	10	10-Sep	2020	29/10/2020	NA	2	154	159	5		NA	NA	108	18	0	Col-0_2_6_1	0
Col-0	2	Col-0	1	6	9	10	10-Sep	2020	29/10/2020	NA	2	154	159	5		NA	NA	108	19	0	Col-0_2_6_1	0
Col-0	2	Col-0	5	6	9	10	10-Sep	2020	29/10/2020	NA	2	48	162	114		NA	NA	109	1	0	Col-0_2_6_5	0
Col-0	2	Col-0	5	6	9	10	10-Sep	2020	29/10/2020	NA	2	48	162	114		NA	NA	109	2	0	Col-0_2_6_5	0
Col-0	2	Col-0	5	6	9	10	10-Sep	2020	29/10/2020	NA	2	48	162	114		NA	NA	109	3	1	Col-0_2_6_5	0.617283951
Col-0	2	Col-0	5	6	9	10	10-Sep	2020	29/10/2020	NA	2	48	162	114		NA	NA	109	4	11	Col-0_2_6_5	6.790123457
Col-0	2	Col-0	5	6	9	10	10-Sep	2020	29/10/2020	NA	2	48	162	114		NA	NA	109	5	14	Col-0_2_6_5	8.641975309
Col-0	2	Col-0	5	6	9	10	10-Sep	2020	29/10/2020	NA	2	48	162	114		NA	NA	109	6	4	Col-0_2_6_5	2.469135802
Col-0	2	Col-0	5	6	9	10	10-Sep	2020	29/10/2020	NA	2	48	162	114		NA	NA	109	7	3	Col-0_2_6_5	1.851851852
Col-0	2	Col-0	5	6	9	10	10-Sep	2020	29/10/2020	NA	2	48	162	114		NA	NA	109	8	1	Col-0_2_6_5	0.617283951
Col-0	2	Col-0	5	6	9	10	10-Sep	2020	29/10/2020	NA	2	48	162	114		NA	NA	109	9	3	Col-0_2_6_5	1.851851852
Col-0	2	Col-0	5	6	9	10	10-Sep	2020	29/10/2020	NA	2	48	162	114		NA	NA	109	10	3	Col-0_2_6_5	1.851851852
Col-0	2	Col-0	5	6	9	10	10-Sep	2020	29/10/2020	NA	2	48	162	114		NA	NA	109	11	0	Col-0_2_6_5	0
Col-0	2	Col-0	5	6	9	10	10-Sep	2020	29/10/2020	NA	2	48	162	114		NA	NA	109	12	5	Col-0_2_6_5	3.086419753
Col-0	2	Col-0	5	6	9	10	10-Sep	2020	29/10/2020	NA	2	48	162	114		NA	NA	109	13	1	Col-0_2_6_5	0.617283951
Col-0	2	Col-0	5	6	9	10	10-Sep	2020	29/10/2020	NA	2	48	162	114		NA	NA	109	14	0	Col-0_2_6_5	0
Col-0	2	Col-0	5	6	9	10	10-Sep	2020	29/10/2020	NA	2	48	162	114		NA	NA	109	15	1	Col-0_2_6_5	0.617283951
Col-0	2	Col-0	5	6	9	10	10-Sep	2020	29/10/2020	NA	2	48	162	114		NA	NA	109	16	1	Col-0_2_6_5	0.617283951
Col-0	2	Col-0	5	6	9	10	10-Sep	2020	29/10/2020	NA	2	48	162	114		NA	NA	109	17	0	Col-0_2_6_5	0
Col-0	2	Col-0	5	6	9	10	10-Sep	2020	29/10/2020	NA	2	48	162	114		NA	NA	109	18	0	Col-0_2_6_5	0
Col-0	2	Col-0	5	6	9	10	10-Sep	2020	29/10/2020	NA	2	48	162	114		NA	NA	109	19	0	Col-0_2_6_5	0
Col-0	2	Col-0	10	6	9	10	10-Sep	2020	29/10/2020	NA	2	10	162	152		NA	NA	111	1	0	Col-0_2_6_10	0
Col-0	2	Col-0	10	6	9	10	10-Sep	2020	29/10/2020	NA	2	10	162	152		NA	NA	111	2	0	Col-0_2_6_10	0
Col-0	2	Col-0	10	6	9	10	10-Sep	2020	29/10/2020	NA	2	10	162	152		NA	NA	111	3	1	Col-0_2_6_10	0.617283951
Col-0	2	Col-0	10	6	9	10	10-Sep	2020	29/10/2020	NA	2	10	162	152		NA	NA	111	4	1	Col-0_2_6_10	0.617283951
Col-0	2	Col-0	10	6	9	10	10-Sep	2020	29/10/2020	NA	2	10	162	152		NA	NA	111	5	2	Col-0_2_6_10	1.234567901
Col-0	2	Col-0	10	6	9	10	10-Sep	2020	29/10/2020	NA	2	10	162	152		NA	NA	111	6	2	Col-0_2_6_10	1.234567901
Col-0	2	Col-0	10	6	9	10	10-Sep	2020	29/10/2020	NA	2	10	162	152		NA	NA	111	7	2	Col-0_2_6_10	1.234567901
Col-0	2	Col-0	10	6	9	10	10-Sep	2020	29/10/2020	NA	2	10	162	152		NA	NA	111	8	0	Col-0_2_6_10	0
Col-0	2	Col-0	10	6	9	10	10-Sep	2020	29/10/2020	NA	2	10	162	152		NA	NA	111	9	0	Col-0_2_6_10	0
Col-0	2	Col-0	10	6	9	10	10-Sep	2020	29/10/2020	NA	2	10	162	152		NA	NA	111	10	0	Col-0_2_6_10	0
[truncated: 1,681 more rows]
