# Supplementary material for: An ABA-GA bistable switch can account for natural variation in the variability of Arabidopsis seed germination time
Source: eLife. 2021 Jun 1;10:e59485. doi: 10.7554/eLife.59485 (PMC8169117; doi:10.7554/eLife.59485)
Supplement: Figure 6—source data 1. [file elife-59485-fig6-data1.tds]

Magic_line	Hormone	conc_uM	High.or.low.variability	mean_median	mean_mean	mean_mode	mean_cv	mean_percent
108	ABA	0	L	3	2.86666666666667	3	0.142531818219726	100
108	ABA	1	L	3	3.27442380460956	3	0.189392297906329	95.3225806451613
108	ABA	5	L	8	8.05263157894737	3	0.494761549482675	85.7142857142857
108	ABA	10	L	4.25	7.08800690250216	3.5	0.639737783983708	64.6446078431373
108	GA	0	L	3	2.69107431725188	3	0.20292273954344	99.7797356828194
108	GA	1	L	2.5	2.68357265586647	2.5	0.237250080048942	99.4897959183673
108	GA	10	L	2.5	2.38726940909539	2.5	0.200260434667868	100
108	GA	100	L	2	2.02907268170426	2	0.0775872779970478	100
123	ABA	0	L	2.5	2.50211573045594	2.5	0.236599838094595	99.7596153846154
123	ABA	1	L	3	3.0093611316568	3	0.251786266781864	98.8439306358381
123	ABA	5	L	6	6.67477191267514	5	0.491557259735186	99.009900990099
123	ABA	10	L	7.5	7.7190708081074	5.5	0.542040884253208	70.7359740097463
123	GA	0	L	2.5	2.32587510719576	2.5	0.158504487096517	99.5098039215686
123	GA	1	L	2.5	2.29212957051036	2.5	0.153919697172367	100
123	GA	10	L	2	2.29591881274553	2	0.210139565586386	99.3197278911565
123	GA	100	L	2	2.07980556239232	2	0.110437699730689	100
143	ABA	0	H	5	5.25795121198086	4.33333333333333	0.323549058551223	86.1147156889249
143	ABA	1	H	7.33333333333333	7.62728281276668	7	0.310389838549838	90.5957504953201
143	ABA	5	H	17.6666666666667	15.49	19.6666666666667	0.327341310295012	39.0957446808511
143	ABA	10	H	11.5	9.93333333333333	11.1666666666667	0.351243791803242	2.22634049913516
143	GA	0	H	3.5	3.57447845583934	3	0.246147979587673	99.4170734840699
143	GA	1	H	3.5	3.55025070852409	3.5	0.204715499125979	100
143	GA	10	H	3.5	3.50082417582418	3.5	0.270025292140849	99.2424242424242
143	GA	100	H	3	3.00460235640648	3	0.165693168240651	99.7435897435898
151	ABA	0	L	3	2.90580286168521	3	0.179535896005405	76.9107551487414
151	ABA	1	L	5	4.83225604670559	5.5	0.193299504993408	67.6388888888889
151	ABA	5	L	9.5	8.98182957393484	11.5	0.437598512215164	42.0530281077948
151	ABA	10	L	8.5	9.42727272727273	10	0.36962043393695	20.5128205128205
151	GA	0	L	2	2.17272727272727	2	0.174776359628227	99.0990990990991
151	GA	1	L	2	2.08139534883721	2	0.131757608339031	100
151	GA	10	L	2	2.06818181818182	2	0.132702748629597	100
151	GA	100	L	2	2.03061224489796	2	0.110776243158207	100
178	ABA	0	H	4.5	4.88698836276084	4.5	0.432004830379705	83.75
178	ABA	1	H	5.5	5.90467289719626	5	0.403208907606691	88.2925378208397
178	ABA	5	H	5	7.77558941920644	4.75	0.628742487029217	50.4492600422833
178	ABA	10	H	7	7.65044479330194	5.5	0.437875210837366	34.0777211183401
178	GA	0	H	5.5	5.46198951434879	6	0.365754077753658	80.6049213943951
178	GA	1	H	4.5	4.73096078678603	3.5	0.37374467934921	85.8303002729754
178	GA	10	H	3.75	3.8347619047619	3.5	0.307266369140463	100
178	GA	100	H	3	3.26120857699805	3	0.232979848120194	100
182	ABA	0	H	4	4.55800151883878	3.66666666666667	0.461488978265185	75.0127232729183
182	ABA	1	H	6	6.79723995376493	4.83333333333333	0.410420637523228	79.4250277942717
182	ABA	5	H	7.16666666666667	9.03703703703704	6.55555555555556	0.535447075666645	10.5600551056006
182	ABA	10	H	7.83333333333333	9	7	0.445014202430996	3.60204042932453
182	GA	0	H	4.5	5.01523359974253	3	0.420066331270404	91.1609088079676
182	GA	1	H	3.5	4.8832745677889	3	0.502157068156453	98.4567901234568
182	GA	10	H	3	3.58688387635756	3	0.375263496123179	100
182	GA	100	H	3	3.41733461169703	3	0.287482934409421	100
213	ABA	0	L	2.66666666666667	2.94189814814815	2.66666666666667	0.19325758409326	100
213	ABA	1	L	3	3.2861297522413	3	0.24708270624545	99.4632313472893
213	ABA	5	L	6	6.88983855650522	7	0.594874187630721	97.1409253356515
213	ABA	10	L	6.5	7.20588438906196	3	0.699359386897848	73.1826286513786
213	GA	0	L	2	2.36186123805567	2	0.199663568744726	100
213	GA	1	L	2	2.20405966132107	2	0.174790044445863	100
213	GA	10	L	2	2.14500473933649	2	0.160977023717991	100
213	GA	100	L	2	2.07979447393494	2	0.118714827568984	100
285	ABA	0	H	5	4.93398268398268	4	0.386021120899578	59.6949152542373
285	ABA	1	H	6	7.17577030812325	7	0.42313188033515	56.568613451378
285	ABA	5	H	9	9.42412617220801	12	0.379074850713123	31.9277108433735
285	ABA	10	H	10.5	10.7285714285714	10.5	0.349898009848631	18.7749500998004
285	GA	0	H	4.5	4.6333855799373	4.25	0.279933991763834	48.2675438596491
285	GA	1	H	4.5	4.67955529319166	4.5	0.439710060777547	57.6771975773449
285	GA	10	H	4.5	4.57813881520778	4.25	0.305551363111978	100
285	GA	100	H	4	4.19278294521013	4	0.282978865616525	99.7584541062802
393	ABA	0	H	4	4.64758412424504	4	0.359702531900565	93.1750298685783
393	ABA	1	H	5.5	6.19260606060606	4	0.388616908771232	95.4128440366972
393	ABA	5	H	14.5	12.9315384615385	16.5	0.337374165077048	51.7040149393091
393	ABA	10	H	5.5	5.72222222222222	5.66666666666667	0.356997054786447	4.16320967168425
393	GA	0	H	4	3.8869713174526	3	0.266192283252332	98.2880806010929
393	GA	1	H	4	3.95995550611791	4	0.308840957432585	98.9473684210526
393	GA	10	H	3	3.39505335503708	3	0.194322411034369	100
393	GA	100	H	3	3.02086118199862	3	0.250009820107859	99.5762711864407
467	ABA	0	L	2.5	2.79048645320197	2.5	0.25387405403117	97.9901477832512
467	ABA	1	L	3	3.13053467000835	3	0.209460164611674	97.1074380165289
467	ABA	5	L	5	5.53990093560815	4	0.481848099370173	86.7773046734725
467	ABA	10	L	5	5.47444298820446	4.5	0.420502756860323	46.4780816785313
467	GA	0	L	3	2.825	3	0.236959158671977	96
467	GA	1	L	3	2.76875	3	0.168102010819326	94.6745562130178
467	GA	10	L	2	2.57894736842105	2	0.277295402268674	95
467	GA	100	L	2	2.50877192982456	2	0.346206819426198	100
53	ABA	0	H	7	7.04475213133945	7.33333333333333	0.515699764479338	44.6812326160152
53	ABA	1	H	6.66666666666667	6.22272272272272	6.66666666666667	0.41891444743694	37.4453584413173
53	ABA	5	H	10.8333333333333	11.8118858153341	10.8888888888889	0.352748690988152	34.5518294503545
53	ABA	10	H	13.3333333333333	12.3316502463054	13.6666666666667	0.31643640686229	23.2795835449467
53	GA	0	H	4.5	4.82298850574713	3.25	0.488783819384524	80.2850796001481
53	GA	1	H	4	4.53107476635514	3	0.50964879282756	93.9498321851263
53	GA	10	H	3.25	3.38837746952501	2.5	0.341253404230933	100
53	GA	100	H	3.5	3.50994639666468	3.5	0.317251008159011	99.7727272727273
Col	ABA	0	L	2	2.38055555555556	2	0.199815653722844	97.3684210526316
Col	ABA	1	L	2.5	2.57768218623482	2.5	0.209948464779068	95.2409007593611
Col	ABA	5	L	3	4.00358206552363	3	0.501817346274662	93.8902654867257
Col	ABA	10	L	4	4.68892045454546	3	0.596186069086799	81.516290726817
Col	GA	0	L	2	2.32412358882947	2	0.216244599051748	95.945945945946
Col	GA	1	L	2.5	2.42370453731649	2.5	0.191530869059599	98.8430784607696
Col	GA	10	L	2	2.25579845374567	2	0.214490585353904	100
Col	GA	100	L	2	2.06812674743709	2	0.142925160671018	99.2111056751468
