# Supplementary material for: An ABA-GA bistable switch can account for natural variation in the variability of Arabidopsis seed germination time
Source: eLife. 2021 Jun 1;10:e59485. doi: 10.7554/eLife.59485 (PMC8169117; doi:10.7554/eLife.59485)
Supplement: Figure 7—source data 1. [file elife-59485-fig7-data1.tds]

Line	Rep	Sowing.day	Sowing.month	Sowing_date	Year	Scoring.date	Experiment	DAR	MeanDAR	Total.germinated	Total	NonGer	X	id	day	number	name	perc
Col	1	10	9	10/09/2018	2018	19/09/2018	2	39	39	171	171	0		1	1	0	Col_1_2	0
Col	1	10	9	10/09/2018	2018	19/09/2018	2	39	39	171	171	0		1	2	40	Col_1_2	23.3918128654971
Col	1	10	9	10/09/2018	2018	19/09/2018	2	39	39	171	171	0		1	3	83	Col_1_2	48.5380116959064
Col	1	10	9	10/09/2018	2018	19/09/2018	2	39	39	171	171	0		1	4	21	Col_1_2	12.280701754386
Col	1	10	9	10/09/2018	2018	19/09/2018	2	39	39	171	171	0		1	5	15	Col_1_2	8.7719298245614
Col	1	10	9	10/09/2018	2018	19/09/2018	2	39	39	171	171	0		1	6	6	Col_1_2	3.50877192982456
Col	1	10	9	10/09/2018	2018	19/09/2018	2	39	39	171	171	0		1	7	3	Col_1_2	1.75438596491228
Col	1	10	9	10/09/2018	2018	19/09/2018	2	39	39	171	171	0		1	8	2	Col_1_2	1.16959064327485
Col	1	10	9	10/09/2018	2018	19/09/2018	2	39	39	171	171	0		1	9	1	Col_1_2	0.584795321637427
Col	1	10	9	10/09/2018	2018	19/09/2018	2	39	39	171	171	0		1	10	0	Col_1_2	0
Col	1	10	9	10/09/2018	2018	19/09/2018	2	39	39	171	171	0		1	11	0	Col_1_2	0
Col	1	10	9	10/09/2018	2018	19/09/2018	2	39	39	171	171	0		1	12	0	Col_1_2	0
Col	1	10	9	10/09/2018	2018	19/09/2018	2	39	39	171	171	0		1	13	0	Col_1_2	0
Col	1	10	9	10/09/2018	2018	19/09/2018	2	39	39	171	171	0		1	14	0	Col_1_2	0
Col	1	10	9	10/09/2018	2018	19/09/2018	2	39	39	171	171	0		1	15	0	Col_1_2	0
Col	1	10	9	10/09/2018	2018	19/09/2018	2	39	39	171	171	0		1	16	0	Col_1_2	0
Col	1	10	9	10/09/2018	2018	19/09/2018	2	39	39	171	171	0		1	17	0	Col_1_2	0
Col	1	10	9	10/09/2018	2018	19/09/2018	2	39	39	171	171	0		1	18	0	Col_1_2	0
Col	1	10	9	10/09/2018	2018	19/09/2018	2	39	39	171	171	0		1	19	0	Col_1_2	0
Col	1	10	9	10/09/2018	2018	19/09/2018	2	39	39	171	171	0		1	20	0	Col_1_2	0
Col	1	10	9	10/09/2018	2018	19/09/2018	2	39	39	171	171	0		1	21	0	Col_1_2	0
Col	1	10	9	10/09/2018	2018	19/09/2018	2	39	39	171	171	0		1	22	0	Col_1_2	0
Col	1	10	9	10/09/2018	2018	19/09/2018	2	39	39	171	171	0		1	23	0	Col_1_2	0
Col	1	10	9	10/09/2018	2018	19/09/2018	2	39	39	171	171	0		1	24	0	Col_1_2	0
Col	1	10	9	10/09/2018	2018	19/09/2018	2	39	39	171	171	0		1	25	0	Col_1_2	0
Col	1	10	9	10/09/2018	2018	19/09/2018	2	39	39	171	171	0		1	26	0	Col_1_2	0
Col	1	10	9	10/09/2018	2018	19/09/2018	2	39	39	171	171	0		1	27	0	Col_1_2	0
Col	1	10	9	10/09/2018	2018	19/09/2018	2	39	39	171	171	0		1	28	0	Col_1_2	0
Col	1	10	9	10/09/2018	2018	19/09/2018	2	39	39	171	171	0		1	29	0	Col_1_2	0
Col	1	10	9	10/09/2018	2018	19/09/2018	2	39	39	171	171	0		1	30	0	Col_1_2	0
Col	1	10	9	10/09/2018	2018	19/09/2018	2	39	39	171	171	0		1	31	0	Col_1_2	0
Col	1	10	9	10/09/2018	2018	19/09/2018	2	39	39	171	171	0		1	32	0	Col_1_2	0
Col	1	10	9	10/09/2018	2018	19/09/2018	2	39	39	171	171	0		1	33	0	Col_1_2	0
Col	1	10	9	10/09/2018	2018	19/09/2018	2	39	39	171	171	0		1	34	0	Col_1_2	0
Col	1	10	9	10/09/2018	2018	19/09/2018	2	39	39	171	171	0		1	35	0	Col_1_2	0
Col	1	10	9	10/09/2018	2018	19/09/2018	2	39	39	171	171	0		1	36	0	Col_1_2	0
Col	1	10	9	10/09/2018	2018	19/09/2018	2	39	39	171	171	0		1	37	0	Col_1_2	0
Col	1	10	9	10/09/2018	2018	19/09/2018	2	39	39	171	171	0		1	38	0	Col_1_2	0
Col	1	10	9	10/09/2018	2018	19/09/2018	2	39	39	171	171	0		1	39	0	Col_1_2	0
Col	1	10	9	10/09/2018	2018	19/09/2018	2	39	39	171	171	0		1	40	0	Col_1_2	0
Col	1	10	9	10/09/2018	2018	19/09/2018	2	39	39	171	171	0		1	41	0	Col_1_2	0
Col	1	10	9	10/09/2018	2018	19/09/2018	2	39	39	171	171	0		1	42	0	Col_1_2	0
Col	1	10	9	10/09/2018	2018	19/09/2018	2	39	39	171	171	0		1	43	0	Col_1_2	0
Col	1	10	9	10/09/2018	2018	19/09/2018	2	39	39	171	171	0		1	44	0	Col_1_2	0
Col	1	10	9	10/09/2018	2018	19/09/2018	2	39	39	171	171	0		1	45	0	Col_1_2	0
Col	1	10	9	10/09/2018	2018	19/09/2018	2	39	39	171	171	0		1	46	0	Col_1_2	0
Col	1	10	9	10/09/2018	2018	19/09/2018	2	39	39	171	171	0		1	47	0	Col_1_2	0
Col	1	10	9	10/09/2018	2018	19/09/2018	2	39	39	171	171	0		1	48	0	Col_1_2	0
Col	2	10	9	10/09/2018	2018	19/09/2018	2	39	39	233	239	6		2	1	0	Col_2_2	0
Col	2	10	9	10/09/2018	2018	19/09/2018	2	39	39	233	239	6		2	2	221	Col_2_2	92.4686192468619
Col	2	10	9	10/09/2018	2018	19/09/2018	2	39	39	233	239	6		2	3	12	Col_2_2	5.02092050209205
Col	2	10	9	10/09/2018	2018	19/09/2018	2	39	39	233	239	6		2	4	0	Col_2_2	0
Col	2	10	9	10/09/2018	2018	19/09/2018	2	39	39	233	239	6		2	5	0	Col_2_2	0
Col	2	10	9	10/09/2018	2018	19/09/2018	2	39	39	233	239	6		2	6	0	Col_2_2	0
Col	2	10	9	10/09/2018	2018	19/09/2018	2	39	39	233	239	6		2	7	0	Col_2_2	0
Col	2	10	9	10/09/2018	2018	19/09/2018	2	39	39	233	239	6		2	8	0	Col_2_2	0
Col	2	10	9	10/09/2018	2018	19/09/2018	2	39	39	233	239	6		2	9	0	Col_2_2	0
Col	2	10	9	10/09/2018	2018	19/09/2018	2	39	39	233	239	6		2	10	0	Col_2_2	0
Col	2	10	9	10/09/2018	2018	19/09/2018	2	39	39	233	239	6		2	11	0	Col_2_2	0
Col	2	10	9	10/09/2018	2018	19/09/2018	2	39	39	233	239	6		2	12	0	Col_2_2	0
Col	2	10	9	10/09/2018	2018	19/09/2018	2	39	39	233	239	6		2	13	0	Col_2_2	0
Col	2	10	9	10/09/2018	2018	19/09/2018	2	39	39	233	239	6		2	14	0	Col_2_2	0
Col	2	10	9	10/09/2018	2018	19/09/2018	2	39	39	233	239	6		2	15	0	Col_2_2	0
Col	2	10	9	10/09/2018	2018	19/09/2018	2	39	39	233	239	6		2	16	0	Col_2_2	0
Col	2	10	9	10/09/2018	2018	19/09/2018	2	39	39	233	239	6		2	17	0	Col_2_2	0
Col	2	10	9	10/09/2018	2018	19/09/2018	2	39	39	233	239	6		2	18	0	Col_2_2	0
Col	2	10	9	10/09/2018	2018	19/09/2018	2	39	39	233	239	6		2	19	0	Col_2_2	0
Col	2	10	9	10/09/2018	2018	19/09/2018	2	39	39	233	239	6		2	20	0	Col_2_2	0
Col	2	10	9	10/09/2018	2018	19/09/2018	2	39	39	233	239	6		2	21	0	Col_2_2	0
Col	2	10	9	10/09/2018	2018	19/09/2018	2	39	39	233	239	6		2	22	0	Col_2_2	0
Col	2	10	9	10/09/2018	2018	19/09/2018	2	39	39	233	239	6		2	23	0	Col_2_2	0
Col	2	10	9	10/09/2018	2018	19/09/2018	2	39	39	233	239	6		2	24	0	Col_2_2	0
Col	2	10	9	10/09/2018	2018	19/09/2018	2	39	39	233	239	6		2	25	0	Col_2_2	0
Col	2	10	9	10/09/2018	2018	19/09/2018	2	39	39	233	239	6		2	26	0	Col_2_2	0
Col	2	10	9	10/09/2018	2018	19/09/2018	2	39	39	233	239	6		2	27	0	Col_2_2	0
Col	2	10	9	10/09/2018	2018	19/09/2018	2	39	39	233	239	6		2	28	0	Col_2_2	0
Col	2	10	9	10/09/2018	2018	19/09/2018	2	39	39	233	239	6		2	29	0	Col_2_2	0
Col	2	10	9	10/09/2018	2018	19/09/2018	2	39	39	233	239	6		2	30	0	Col_2_2	0
Col	2	10	9	10/09/2018	2018	19/09/2018	2	39	39	233	239	6		2	31	0	Col_2_2	0
Col	2	10	9	10/09/2018	2018	19/09/2018	2	39	39	233	239	6		2	32	0	Col_2_2	0
Col	2	10	9	10/09/2018	2018	19/09/2018	2	39	39	233	239	6		2	33	0	Col_2_2	0
Col	2	10	9	10/09/2018	2018	19/09/2018	2	39	39	233	239	6		2	34	0	Col_2_2	0
Col	2	10	9	10/09/2018	2018	19/09/2018	2	39	39	233	239	6		2	35	0	Col_2_2	0
Col	2	10	9	10/09/2018	2018	19/09/2018	2	39	39	233	239	6		2	36	0	Col_2_2	0
Col	2	10	9	10/09/2018	2018	19/09/2018	2	39	39	233	239	6		2	37	0	Col_2_2	0
Col	2	10	9	10/09/2018	2018	19/09/2018	2	39	39	233	239	6		2	38	0	Col_2_2	0
Col	2	10	9	10/09/2018	2018	19/09/2018	2	39	39	233	239	6		2	39	0	Col_2_2	0
Col	2	10	9	10/09/2018	2018	19/09/2018	2	39	39	233	239	6		2	40	0	Col_2_2	0
Col	2	10	9	10/09/2018	2018	19/09/2018	2	39	39	233	239	6		2	41	0	Col_2_2	0
Col	2	10	9	10/09/2018	2018	19/09/2018	2	39	39	233	239	6		2	42	0	Col_2_2	0
Col	2	10	9	10/09/2018	2018	19/09/2018	2	39	39	233	239	6		2	43	0	Col_2_2	0
Col	2	10	9	10/09/2018	2018	19/09/2018	2	39	39	233	239	6		2	44	0	Col_2_2	0
Col	2	10	9	10/09/2018	2018	19/09/2018	2	39	39	233	239	6		2	45	0	Col_2_2	0
Col	2	10	9	10/09/2018	2018	19/09/2018	2	39	39	233	239	6		2	46	0	Col_2_2	0
Col	2	10	9	10/09/2018	2018	19/09/2018	2	39	39	233	239	6		2	47	0	Col_2_2	0
Col	2	10	9	10/09/2018	2018	19/09/2018	2	39	39	233	239	6		2	48	0	Col_2_2	0
Col	3	10	9	10/09/2018	2018	19/09/2018	2	39	39	200	200	0		3	1	0	Col_3_2	0
Col	3	10	9	10/09/2018	2018	19/09/2018	2	39	39	200	200	0		3	2	174	Col_3_2	87
Col	3	10	9	10/09/2018	2018	19/09/2018	2	39	39	200	200	0		3	3	21	Col_3_2	10.5
Col	3	10	9	10/09/2018	2018	19/09/2018	2	39	39	200	200	0		3	4	4	Col_3_2	2
Col	3	10	9	10/09/2018	2018	19/09/2018	2	39	39	200	200	0		3	5	1	Col_3_2	0.5
Col	3	10	9	10/09/2018	2018	19/09/2018	2	39	39	200	200	0		3	6	0	Col_3_2	0
Col	3	10	9	10/09/2018	2018	19/09/2018	2	39	39	200	200	0		3	7	0	Col_3_2	0
Col	3	10	9	10/09/2018	2018	19/09/2018	2	39	39	200	200	0		3	8	0	Col_3_2	0
Col	3	10	9	10/09/2018	2018	19/09/2018	2	39	39	200	200	0		3	9	0	Col_3_2	0
Col	3	10	9	10/09/2018	2018	19/09/2018	2	39	39	200	200	0		3	10	0	Col_3_2	0
Col	3	10	9	10/09/2018	2018	19/09/2018	2	39	39	200	200	0		3	11	0	Col_3_2	0
Col	3	10	9	10/09/2018	2018	19/09/2018	2	39	39	200	200	0		3	12	0	Col_3_2	0
Col	3	10	9	10/09/2018	2018	19/09/2018	2	39	39	200	200	0		3	13	0	Col_3_2	0
Col	3	10	9	10/09/2018	2018	19/09/2018	2	39	39	200	200	0		3	14	0	Col_3_2	0
Col	3	10	9	10/09/2018	2018	19/09/2018	2	39	39	200	200	0		3	15	0	Col_3_2	0
Col	3	10	9	10/09/2018	2018	19/09/2018	2	39	39	200	200	0		3	16	0	Col_3_2	0
Col	3	10	9	10/09/2018	2018	19/09/2018	2	39	39	200	200	0		3	17	0	Col_3_2	0
Col	3	10	9	10/09/2018	2018	19/09/2018	2	39	39	200	200	0		3	18	0	Col_3_2	0
Col	3	10	9	10/09/2018	2018	19/09/2018	2	39	39	200	200	0		3	19	0	Col_3_2	0
Col	3	10	9	10/09/2018	2018	19/09/2018	2	39	39	200	200	0		3	20	0	Col_3_2	0
Col	3	10	9	10/09/2018	2018	19/09/2018	2	39	39	200	200	0		3	21	0	Col_3_2	0
Col	3	10	9	10/09/2018	2018	19/09/2018	2	39	39	200	200	0		3	22	0	Col_3_2	0
Col	3	10	9	10/09/2018	2018	19/09/2018	2	39	39	200	200	0		3	23	0	Col_3_2	0
Col	3	10	9	10/09/2018	2018	19/09/2018	2	39	39	200	200	0		3	24	0	Col_3_2	0
Col	3	10	9	10/09/2018	2018	19/09/2018	2	39	39	200	200	0		3	25	0	Col_3_2	0
Col	3	10	9	10/09/2018	2018	19/09/2018	2	39	39	200	200	0		3	26	0	Col_3_2	0
Col	3	10	9	10/09/2018	2018	19/09/2018	2	39	39	200	200	0		3	27	0	Col_3_2	0
Col	3	10	9	10/09/2018	2018	19/09/2018	2	39	39	200	200	0		3	28	0	Col_3_2	0
Col	3	10	9	10/09/2018	2018	19/09/2018	2	39	39	200	200	0		3	29	0	Col_3_2	0
Col	3	10	9	10/09/2018	2018	19/09/2018	2	39	39	200	200	0		3	30	0	Col_3_2	0
Col	3	10	9	10/09/2018	2018	19/09/2018	2	39	39	200	200	0		3	31	0	Col_3_2	0
Col	3	10	9	10/09/2018	2018	19/09/2018	2	39	39	200	200	0		3	32	0	Col_3_2	0
Col	3	10	9	10/09/2018	2018	19/09/2018	2	39	39	200	200	0		3	33	0	Col_3_2	0
Col	3	10	9	10/09/2018	2018	19/09/2018	2	39	39	200	200	0		3	34	0	Col_3_2	0
Col	3	10	9	10/09/2018	2018	19/09/2018	2	39	39	200	200	0		3	35	0	Col_3_2	0
Col	3	10	9	10/09/2018	2018	19/09/2018	2	39	39	200	200	0		3	36	0	Col_3_2	0
Col	3	10	9	10/09/2018	2018	19/09/2018	2	39	39	200	200	0		3	37	0	Col_3_2	0
Col	3	10	9	10/09/2018	2018	19/09/2018	2	39	39	200	200	0		3	38	0	Col_3_2	0
Col	3	10	9	10/09/2018	2018	19/09/2018	2	39	39	200	200	0		3	39	0	Col_3_2	0
Col	3	10	9	10/09/2018	2018	19/09/2018	2	39	39	200	200	0		3	40	0	Col_3_2	0
Col	3	10	9	10/09/2018	2018	19/09/2018	2	39	39	200	200	0		3	41	0	Col_3_2	0
Col	3	10	9	10/09/2018	2018	19/09/2018	2	39	39	200	200	0		3	42	0	Col_3_2	0
Col	3	10	9	10/09/2018	2018	19/09/2018	2	39	39	200	200	0		3	43	0	Col_3_2	0
Col	3	10	9	10/09/2018	2018	19/09/2018	2	39	39	200	200	0		3	44	0	Col_3_2	0
Col	3	10	9	10/09/2018	2018	19/09/2018	2	39	39	200	200	0		3	45	0	Col_3_2	0
Col	3	10	9	10/09/2018	2018	19/09/2018	2	39	39	200	200	0		3	46	0	Col_3_2	0
Col	3	10	9	10/09/2018	2018	19/09/2018	2	39	39	200	200	0		3	47	0	Col_3_2	0
Col	3	10	9	10/09/2018	2018	19/09/2018	2	39	39	200	200	0		3	48	0	Col_3_2	0
cyp707a1-1	1	10	9	10/09/2018	2018	19/09/2018	2	39	39	165	168	3		7	1	0	cyp707a1-1_1_2	0
cyp707a1-1	1	10	9	10/09/2018	2018	19/09/2018	2	39	39	165	168	3		7	2	57	cyp707a1-1_1_2	33.9285714285714
cyp707a1-1	1	10	9	10/09/2018	2018	19/09/2018	2	39	39	165	168	3		7	3	75	cyp707a1-1_1_2	44.6428571428571
cyp707a1-1	1	10	9	10/09/2018	2018	19/09/2018	2	39	39	165	168	3		7	4	24	cyp707a1-1_1_2	14.2857142857143
cyp707a1-1	1	10	9	10/09/2018	2018	19/09/2018	2	39	39	165	168	3		7	5	6	cyp707a1-1_1_2	3.57142857142857
cyp707a1-1	1	10	9	10/09/2018	2018	19/09/2018	2	39	39	165	168	3		7	6	0	cyp707a1-1_1_2	0
cyp707a1-1	1	10	9	10/09/2018	2018	19/09/2018	2	39	39	165	168	3		7	7	1	cyp707a1-1_1_2	0.595238095238095
cyp707a1-1	1	10	9	10/09/2018	2018	19/09/2018	2	39	39	165	168	3		7	8	1	cyp707a1-1_1_2	0.595238095238095
cyp707a1-1	1	10	9	10/09/2018	2018	19/09/2018	2	39	39	165	168	3		7	9	0	cyp707a1-1_1_2	0
cyp707a1-1	1	10	9	10/09/2018	2018	19/09/2018	2	39	39	165	168	3		7	10	0	cyp707a1-1_1_2	0
cyp707a1-1	1	10	9	10/09/2018	2018	19/09/2018	2	39	39	165	168	3		7	11	1	cyp707a1-1_1_2	0.595238095238095
cyp707a1-1	1	10	9	10/09/2018	2018	19/09/2018	2	39	39	165	168	3		7	12	0	cyp707a1-1_1_2	0
cyp707a1-1	1	10	9	10/09/2018	2018	19/09/2018	2	39	39	165	168	3		7	13	0	cyp707a1-1_1_2	0
cyp707a1-1	1	10	9	10/09/2018	2018	19/09/2018	2	39	39	165	168	3		7	14	0	cyp707a1-1_1_2	0
cyp707a1-1	1	10	9	10/09/2018	2018	19/09/2018	2	39	39	165	168	3		7	15	0	cyp707a1-1_1_2	0
cyp707a1-1	1	10	9	10/09/2018	2018	19/09/2018	2	39	39	165	168	3		7	16	0	cyp707a1-1_1_2	0
cyp707a1-1	1	10	9	10/09/2018	2018	19/09/2018	2	39	39	165	168	3		7	17	0	cyp707a1-1_1_2	0
cyp707a1-1	1	10	9	10/09/2018	2018	19/09/2018	2	39	39	165	168	3		7	18	0	cyp707a1-1_1_2	0
cyp707a1-1	1	10	9	10/09/2018	2018	19/09/2018	2	39	39	165	168	3		7	19	0	cyp707a1-1_1_2	0
cyp707a1-1	1	10	9	10/09/2018	2018	19/09/2018	2	39	39	165	168	3		7	20	0	cyp707a1-1_1_2	0
cyp707a1-1	1	10	9	10/09/2018	2018	19/09/2018	2	39	39	165	168	3		7	21	0	cyp707a1-1_1_2	0
cyp707a1-1	1	10	9	10/09/2018	2018	19/09/2018	2	39	39	165	168	3		7	22	0	cyp707a1-1_1_2	0
cyp707a1-1	1	10	9	10/09/2018	2018	19/09/2018	2	39	39	165	168	3		7	23	0	cyp707a1-1_1_2	0
cyp707a1-1	1	10	9	10/09/2018	2018	19/09/2018	2	39	39	165	168	3		7	24	0	cyp707a1-1_1_2	0
cyp707a1-1	1	10	9	10/09/2018	2018	19/09/2018	2	39	39	165	168	3		7	25	0	cyp707a1-1_1_2	0
cyp707a1-1	1	10	9	10/09/2018	2018	19/09/2018	2	39	39	165	168	3		7	26	0	cyp707a1-1_1_2	0
cyp707a1-1	1	10	9	10/09/2018	2018	19/09/2018	2	39	39	165	168	3		7	27	0	cyp707a1-1_1_2	0
cyp707a1-1	1	10	9	10/09/2018	2018	19/09/2018	2	39	39	165	168	3		7	28	0	cyp707a1-1_1_2	0
cyp707a1-1	1	10	9	10/09/2018	2018	19/09/2018	2	39	39	165	168	3		7	29	0	cyp707a1-1_1_2	0
cyp707a1-1	1	10	9	10/09/2018	2018	19/09/2018	2	39	39	165	168	3		7	30	0	cyp707a1-1_1_2	0
cyp707a1-1	1	10	9	10/09/2018	2018	19/09/2018	2	39	39	165	168	3		7	31	0	cyp707a1-1_1_2	0
cyp707a1-1	1	10	9	10/09/2018	2018	19/09/2018	2	39	39	165	168	3		7	32	0	cyp707a1-1_1_2	0
cyp707a1-1	1	10	9	10/09/2018	2018	19/09/2018	2	39	39	165	168	3		7	33	0	cyp707a1-1_1_2	0
cyp707a1-1	1	10	9	10/09/2018	2018	19/09/2018	2	39	39	165	168	3		7	34	0	cyp707a1-1_1_2	0
cyp707a1-1	1	10	9	10/09/2018	2018	19/09/2018	2	39	39	165	168	3		7	35	0	cyp707a1-1_1_2	0
cyp707a1-1	1	10	9	10/09/2018	2018	19/09/2018	2	39	39	165	168	3		7	36	0	cyp707a1-1_1_2	0
cyp707a1-1	1	10	9	10/09/2018	2018	19/09/2018	2	39	39	165	168	3		7	37	0	cyp707a1-1_1_2	0
cyp707a1-1	1	10	9	10/09/2018	2018	19/09/2018	2	39	39	165	168	3		7	38	0	cyp707a1-1_1_2	0
cyp707a1-1	1	10	9	10/09/2018	2018	19/09/2018	2	39	39	165	168	3		7	39	0	cyp707a1-1_1_2	0
cyp707a1-1	1	10	9	10/09/2018	2018	19/09/2018	2	39	39	165	168	3		7	40	0	cyp707a1-1_1_2	0
cyp707a1-1	1	10	9	10/09/2018	2018	19/09/2018	2	39	39	165	168	3		7	41	0	cyp707a1-1_1_2	0
cyp707a1-1	1	10	9	10/09/2018	2018	19/09/2018	2	39	39	165	168	3		7	42	0	cyp707a1-1_1_2	0
cyp707a1-1	1	10	9	10/09/2018	2018	19/09/2018	2	39	39	165	168	3		7	43	0	cyp707a1-1_1_2	0
cyp707a1-1	1	10	9	10/09/2018	2018	19/09/2018	2	39	39	165	168	3		7	44	0	cyp707a1-1_1_2	0
cyp707a1-1	1	10	9	10/09/2018	2018	19/09/2018	2	39	39	165	168	3		7	45	0	cyp707a1-1_1_2	0
cyp707a1-1	1	10	9	10/09/2018	2018	19/09/2018	2	39	39	165	168	3		7	46	0	cyp707a1-1_1_2	0
cyp707a1-1	1	10	9	10/09/2018	2018	19/09/2018	2	39	39	165	168	3		7	47	0	cyp707a1-1_1_2	0
cyp707a1-1	1	10	9	10/09/2018	2018	19/09/2018	2	39	39	165	168	3		7	48	0	cyp707a1-1_1_2	0
cyp707a1-1	2	10	9	10/09/2018	2018	19/09/2018	2	39	39	176	177	1		8	1	0	cyp707a1-1_2_2	0
cyp707a1-1	2	10	9	10/09/2018	2018	19/09/2018	2	39	39	176	177	1		8	2	5	cyp707a1-1_2_2	2.82485875706215
cyp707a1-1	2	10	9	10/09/2018	2018	19/09/2018	2	39	39	176	177	1		8	3	82	cyp707a1-1_2_2	46.3276836158192
cyp707a1-1	2	10	9	10/09/2018	2018	19/09/2018	2	39	39	176	177	1		8	4	57	cyp707a1-1_2_2	32.2033898305085
cyp707a1-1	2	10	9	10/09/2018	2018	19/09/2018	2	39	39	176	177	1		8	5	20	cyp707a1-1_2_2	11.2994350282486
cyp707a1-1	2	10	9	10/09/2018	2018	19/09/2018	2	39	39	176	177	1		8	6	0	cyp707a1-1_2_2	0
cyp707a1-1	2	10	9	10/09/2018	2018	19/09/2018	2	39	39	176	177	1		8	7	5	cyp707a1-1_2_2	2.82485875706215
cyp707a1-1	2	10	9	10/09/2018	2018	19/09/2018	2	39	39	176	177	1		8	8	5	cyp707a1-1_2_2	2.82485875706215
cyp707a1-1	2	10	9	10/09/2018	2018	19/09/2018	2	39	39	176	177	1		8	9	2	cyp707a1-1_2_2	1.12994350282486
cyp707a1-1	2	10	9	10/09/2018	2018	19/09/2018	2	39	39	176	177	1		8	10	0	cyp707a1-1_2_2	0
cyp707a1-1	2	10	9	10/09/2018	2018	19/09/2018	2	39	39	176	177	1		8	11	0	cyp707a1-1_2_2	0
cyp707a1-1	2	10	9	10/09/2018	2018	19/09/2018	2	39	39	176	177	1		8	12	0	cyp707a1-1_2_2	0
cyp707a1-1	2	10	9	10/09/2018	2018	19/09/2018	2	39	39	176	177	1		8	13	0	cyp707a1-1_2_2	0
cyp707a1-1	2	10	9	10/09/2018	2018	19/09/2018	2	39	39	176	177	1		8	14	0	cyp707a1-1_2_2	0
cyp707a1-1	2	10	9	10/09/2018	2018	19/09/2018	2	39	39	176	177	1		8	15	0	cyp707a1-1_2_2	0
cyp707a1-1	2	10	9	10/09/2018	2018	19/09/2018	2	39	39	176	177	1		8	16	0	cyp707a1-1_2_2	0
cyp707a1-1	2	10	9	10/09/2018	2018	19/09/2018	2	39	39	176	177	1		8	17	0	cyp707a1-1_2_2	0
cyp707a1-1	2	10	9	10/09/2018	2018	19/09/2018	2	39	39	176	177	1		8	18	0	cyp707a1-1_2_2	0
cyp707a1-1	2	10	9	10/09/2018	2018	19/09/2018	2	39	39	176	177	1		8	19	0	cyp707a1-1_2_2	0
cyp707a1-1	2	10	9	10/09/2018	2018	19/09/2018	2	39	39	176	177	1		8	20	0	cyp707a1-1_2_2	0
cyp707a1-1	2	10	9	10/09/2018	2018	19/09/2018	2	39	39	176	177	1		8	21	0	cyp707a1-1_2_2	0
cyp707a1-1	2	10	9	10/09/2018	2018	19/09/2018	2	39	39	176	177	1		8	22	0	cyp707a1-1_2_2	0
cyp707a1-1	2	10	9	10/09/2018	2018	19/09/2018	2	39	39	176	177	1		8	23	0	cyp707a1-1_2_2	0
cyp707a1-1	2	10	9	10/09/2018	2018	19/09/2018	2	39	39	176	177	1		8	24	0	cyp707a1-1_2_2	0
cyp707a1-1	2	10	9	10/09/2018	2018	19/09/2018	2	39	39	176	177	1		8	25	0	cyp707a1-1_2_2	0
cyp707a1-1	2	10	9	10/09/2018	2018	19/09/2018	2	39	39	176	177	1		8	26	0	cyp707a1-1_2_2	0
cyp707a1-1	2	10	9	10/09/2018	2018	19/09/2018	2	39	39	176	177	1		8	27	0	cyp707a1-1_2_2	0
cyp707a1-1	2	10	9	10/09/2018	2018	19/09/2018	2	39	39	176	177	1		8	28	0	cyp707a1-1_2_2	0
cyp707a1-1	2	10	9	10/09/2018	2018	19/09/2018	2	39	39	176	177	1		8	29	0	cyp707a1-1_2_2	0
cyp707a1-1	2	10	9	10/09/2018	2018	19/09/2018	2	39	39	176	177	1		8	30	0	cyp707a1-1_2_2	0
cyp707a1-1	2	10	9	10/09/2018	2018	19/09/2018	2	39	39	176	177	1		8	31	0	cyp707a1-1_2_2	0
cyp707a1-1	2	10	9	10/09/2018	2018	19/09/2018	2	39	39	176	177	1		8	32	0	cyp707a1-1_2_2	0
cyp707a1-1	2	10	9	10/09/2018	2018	19/09/2018	2	39	39	176	177	1		8	33	0	cyp707a1-1_2_2	0
cyp707a1-1	2	10	9	10/09/2018	2018	19/09/2018	2	39	39	176	177	1		8	34	0	cyp707a1-1_2_2	0
cyp707a1-1	2	10	9	10/09/2018	2018	19/09/2018	2	39	39	176	177	1		8	35	0	cyp707a1-1_2_2	0
cyp707a1-1	2	10	9	10/09/2018	2018	19/09/2018	2	39	39	176	177	1		8	36	0	cyp707a1-1_2_2	0
cyp707a1-1	2	10	9	10/09/2018	2018	19/09/2018	2	39	39	176	177	1		8	37	0	cyp707a1-1_2_2	0
cyp707a1-1	2	10	9	10/09/2018	2018	19/09/2018	2	39	39	176	177	1		8	38	0	cyp707a1-1_2_2	0
cyp707a1-1	2	10	9	10/09/2018	2018	19/09/2018	2	39	39	176	177	1		8	39	0	cyp707a1-1_2_2	0
cyp707a1-1	2	10	9	10/09/2018	2018	19/09/2018	2	39	39	176	177	1		8	40	0	cyp707a1-1_2_2	0
cyp707a1-1	2	10	9	10/09/2018	2018	19/09/2018	2	39	39	176	177	1		8	41	0	cyp707a1-1_2_2	0
cyp707a1-1	2	10	9	10/09/2018	2018	19/09/2018	2	39	39	176	177	1		8	42	0	cyp707a1-1_2_2	0
cyp707a1-1	2	10	9	10/09/2018	2018	19/09/2018	2	39	39	176	177	1		8	43	0	cyp707a1-1_2_2	0
cyp707a1-1	2	10	9	10/09/2018	2018	19/09/2018	2	39	39	176	177	1		8	44	0	cyp707a1-1_2_2	0
cyp707a1-1	2	10	9	10/09/2018	2018	19/09/2018	2	39	39	176	177	1		8	45	0	cyp707a1-1_2_2	0
cyp707a1-1	2	10	9	10/09/2018	2018	19/09/2018	2	39	39	176	177	1		8	46	0	cyp707a1-1_2_2	0
cyp707a1-1	2	10	9	10/09/2018	2018	19/09/2018	2	39	39	176	177	1		8	47	0	cyp707a1-1_2_2	0
cyp707a1-1	2	10	9	10/09/2018	2018	19/09/2018	2	39	39	176	177	1		8	48	0	cyp707a1-1_2_2	0
cyp707a1-1	3	10	9	10/09/2018	2018	19/09/2018	2	39	39	207	209	2		9	1	0	cyp707a1-1_3_2	0
cyp707a1-1	3	10	9	10/09/2018	2018	19/09/2018	2	39	39	207	209	2		9	2	72	cyp707a1-1_3_2	34.4497607655502
cyp707a1-1	3	10	9	10/09/2018	2018	19/09/2018	2	39	39	207	209	2		9	3	103	cyp707a1-1_3_2	49.2822966507177
cyp707a1-1	3	10	9	10/09/2018	2018	19/09/2018	2	39	39	207	209	2		9	4	20	cyp707a1-1_3_2	9.56937799043062
cyp707a1-1	3	10	9	10/09/2018	2018	19/09/2018	2	39	39	207	209	2		9	5	8	cyp707a1-1_3_2	3.82775119617225
cyp707a1-1	3	10	9	10/09/2018	2018	19/09/2018	2	39	39	207	209	2		9	6	1	cyp707a1-1_3_2	0.478468899521531
cyp707a1-1	3	10	9	10/09/2018	2018	19/09/2018	2	39	39	207	209	2		9	7	2	cyp707a1-1_3_2	0.956937799043062
cyp707a1-1	3	10	9	10/09/2018	2018	19/09/2018	2	39	39	207	209	2		9	8	0	cyp707a1-1_3_2	0
cyp707a1-1	3	10	9	10/09/2018	2018	19/09/2018	2	39	39	207	209	2		9	9	1	cyp707a1-1_3_2	0.478468899521531
cyp707a1-1	3	10	9	10/09/2018	2018	19/09/2018	2	39	39	207	209	2		9	10	0	cyp707a1-1_3_2	0
cyp707a1-1	3	10	9	10/09/2018	2018	19/09/2018	2	39	39	207	209	2		9	11	0	cyp707a1-1_3_2	0
cyp707a1-1	3	10	9	10/09/2018	2018	19/09/2018	2	39	39	207	209	2		9	12	0	cyp707a1-1_3_2	0
cyp707a1-1	3	10	9	10/09/2018	2018	19/09/2018	2	39	39	207	209	2		9	13	0	cyp707a1-1_3_2	0
cyp707a1-1	3	10	9	10/09/2018	2018	19/09/2018	2	39	39	207	209	2		9	14	0	cyp707a1-1_3_2	0
cyp707a1-1	3	10	9	10/09/2018	2018	19/09/2018	2	39	39	207	209	2		9	15	0	cyp707a1-1_3_2	0
cyp707a1-1	3	10	9	10/09/2018	2018	19/09/2018	2	39	39	207	209	2		9	16	0	cyp707a1-1_3_2	0
cyp707a1-1	3	10	9	10/09/2018	2018	19/09/2018	2	39	39	207	209	2		9	17	0	cyp707a1-1_3_2	0
cyp707a1-1	3	10	9	10/09/2018	2018	19/09/2018	2	39	39	207	209	2		9	18	0	cyp707a1-1_3_2	0
cyp707a1-1	3	10	9	10/09/2018	2018	19/09/2018	2	39	39	207	209	2		9	19	0	cyp707a1-1_3_2	0
cyp707a1-1	3	10	9	10/09/2018	2018	19/09/2018	2	39	39	207	209	2		9	20	0	cyp707a1-1_3_2	0
cyp707a1-1	3	10	9	10/09/2018	2018	19/09/2018	2	39	39	207	209	2		9	21	0	cyp707a1-1_3_2	0
cyp707a1-1	3	10	9	10/09/2018	2018	19/09/2018	2	39	39	207	209	2		9	22	0	cyp707a1-1_3_2	0
cyp707a1-1	3	10	9	10/09/2018	2018	19/09/2018	2	39	39	207	209	2		9	23	0	cyp707a1-1_3_2	0
cyp707a1-1	3	10	9	10/09/2018	2018	19/09/2018	2	39	39	207	209	2		9	24	0	cyp707a1-1_3_2	0
cyp707a1-1	3	10	9	10/09/2018	2018	19/09/2018	2	39	39	207	209	2		9	25	0	cyp707a1-1_3_2	0
cyp707a1-1	3	10	9	10/09/2018	2018	19/09/2018	2	39	39	207	209	2		9	26	0	cyp707a1-1_3_2	0
cyp707a1-1	3	10	9	10/09/2018	2018	19/09/2018	2	39	39	207	209	2		9	27	0	cyp707a1-1_3_2	0
cyp707a1-1	3	10	9	10/09/2018	2018	19/09/2018	2	39	39	207	209	2		9	28	0	cyp707a1-1_3_2	0
cyp707a1-1	3	10	9	10/09/2018	2018	19/09/2018	2	39	39	207	209	2		9	29	0	cyp707a1-1_3_2	0
cyp707a1-1	3	10	9	10/09/2018	2018	19/09/2018	2	39	39	207	209	2		9	30	0	cyp707a1-1_3_2	0
cyp707a1-1	3	10	9	10/09/2018	2018	19/09/2018	2	39	39	207	209	2		9	31	0	cyp707a1-1_3_2	0
cyp707a1-1	3	10	9	10/09/2018	2018	19/09/2018	2	39	39	207	209	2		9	32	0	cyp707a1-1_3_2	0
cyp707a1-1	3	10	9	10/09/2018	2018	19/09/2018	2	39	39	207	209	2		9	33	0	cyp707a1-1_3_2	0
cyp707a1-1	3	10	9	10/09/2018	2018	19/09/2018	2	39	39	207	209	2		9	34	0	cyp707a1-1_3_2	0
cyp707a1-1	3	10	9	10/09/2018	2018	19/09/2018	2	39	39	207	209	2		9	35	0	cyp707a1-1_3_2	0
cyp707a1-1	3	10	9	10/09/2018	2018	19/09/2018	2	39	39	207	209	2		9	36	0	cyp707a1-1_3_2	0
cyp707a1-1	3	10	9	10/09/2018	2018	19/09/2018	2	39	39	207	209	2		9	37	0	cyp707a1-1_3_2	0
cyp707a1-1	3	10	9	10/09/2018	2018	19/09/2018	2	39	39	207	209	2		9	38	0	cyp707a1-1_3_2	0
cyp707a1-1	3	10	9	10/09/2018	2018	19/09/2018	2	39	39	207	209	2		9	39	0	cyp707a1-1_3_2	0
cyp707a1-1	3	10	9	10/09/2018	2018	19/09/2018	2	39	39	207	209	2		9	40	0	cyp707a1-1_3_2	0
cyp707a1-1	3	10	9	10/09/2018	2018	19/09/2018	2	39	39	207	209	2		9	41	0	cyp707a1-1_3_2	0
cyp707a1-1	3	10	9	10/09/2018	2018	19/09/2018	2	39	39	207	209	2		9	42	0	cyp707a1-1_3_2	0
cyp707a1-1	3	10	9	10/09/2018	2018	19/09/2018	2	39	39	207	209	2		9	43	0	cyp707a1-1_3_2	0
cyp707a1-1	3	10	9	10/09/2018	2018	19/09/2018	2	39	39	207	209	2		9	44	0	cyp707a1-1_3_2	0
cyp707a1-1	3	10	9	10/09/2018	2018	19/09/2018	2	39	39	207	209	2		9	45	0	cyp707a1-1_3_2	0
cyp707a1-1	3	10	9	10/09/2018	2018	19/09/2018	2	39	39	207	209	2		9	46	0	cyp707a1-1_3_2	0
cyp707a1-1	3	10	9	10/09/2018	2018	19/09/2018	2	39	39	207	209	2		9	47	0	cyp707a1-1_3_2	0
cyp707a1-1	3	10	9	10/09/2018	2018	19/09/2018	2	39	39	207	209	2		9	48	0	cyp707a1-1_3_2	0
cyp707a1-1 cyp707a2-1	1	10	9	10/09/2018	2018	19/09/2018	2	39	39	7	207	200		16	1	0	cyp707a1-1 cyp707a2-1_1_2	0
cyp707a1-1 cyp707a2-1	1	10	9	10/09/2018	2018	19/09/2018	2	39	39	7	207	200		16	2	0	cyp707a1-1 cyp707a2-1_1_2	0
cyp707a1-1 cyp707a2-1	1	10	9	10/09/2018	2018	19/09/2018	2	39	39	7	207	200		16	3	1	cyp707a1-1 cyp707a2-1_1_2	0.483091787439614
cyp707a1-1 cyp707a2-1	1	10	9	10/09/2018	2018	19/09/2018	2	39	39	7	207	200		16	4	0	cyp707a1-1 cyp707a2-1_1_2	0
cyp707a1-1 cyp707a2-1	1	10	9	10/09/2018	2018	19/09/2018	2	39	39	7	207	200		16	5	1	cyp707a1-1 cyp707a2-1_1_2	0.483091787439614
cyp707a1-1 cyp707a2-1	1	10	9	10/09/2018	2018	19/09/2018	2	39	39	7	207	200		16	6	0	cyp707a1-1 cyp707a2-1_1_2	0
cyp707a1-1 cyp707a2-1	1	10	9	10/09/2018	2018	19/09/2018	2	39	39	7	207	200		16	7	1	cyp707a1-1 cyp707a2-1_1_2	0.483091787439614
cyp707a1-1 cyp707a2-1	1	10	9	10/09/2018	2018	19/09/2018	2	39	39	7	207	200		16	8	1	cyp707a1-1 cyp707a2-1_1_2	0.483091787439614
cyp707a1-1 cyp707a2-1	1	10	9	10/09/2018	2018	19/09/2018	2	39	39	7	207	200		16	9	1	cyp707a1-1 cyp707a2-1_1_2	0.483091787439614
cyp707a1-1 cyp707a2-1	1	10	9	10/09/2018	2018	19/09/2018	2	39	39	7	207	200		16	10	0	cyp707a1-1 cyp707a2-1_1_2	0
cyp707a1-1 cyp707a2-1	1	10	9	10/09/2018	2018	19/09/2018	2	39	39	7	207	200		16	11	0	cyp707a1-1 cyp707a2-1_1_2	0
cyp707a1-1 cyp707a2-1	1	10	9	10/09/2018	2018	19/09/2018	2	39	39	7	207	200		16	12	0	cyp707a1-1 cyp707a2-1_1_2	0
cyp707a1-1 cyp707a2-1	1	10	9	10/09/2018	2018	19/09/2018	2	39	39	7	207	200		16	13	0	cyp707a1-1 cyp707a2-1_1_2	0
cyp707a1-1 cyp707a2-1	1	10	9	10/09/2018	2018	19/09/2018	2	39	39	7	207	200		16	14	1	cyp707a1-1 cyp707a2-1_1_2	0.483091787439614
cyp707a1-1 cyp707a2-1	1	10	9	10/09/2018	2018	19/09/2018	2	39	39	7	207	200		16	15	0	cyp707a1-1 cyp707a2-1_1_2	0
cyp707a1-1 cyp707a2-1	1	10	9	10/09/2018	2018	19/09/2018	2	39	39	7	207	200		16	16	1	cyp707a1-1 cyp707a2-1_1_2	0.483091787439614
cyp707a1-1 cyp707a2-1	1	10	9	10/09/2018	2018	19/09/2018	2	39	39	7	207	200		16	17	0	cyp707a1-1 cyp707a2-1_1_2	0
cyp707a1-1 cyp707a2-1	1	10	9	10/09/2018	2018	19/09/2018	2	39	39	7	207	200		16	18	0	cyp707a1-1 cyp707a2-1_1_2	0
cyp707a1-1 cyp707a2-1	1	10	9	10/09/2018	2018	19/09/2018	2	39	39	7	207	200		16	19	0	cyp707a1-1 cyp707a2-1_1_2	0
cyp707a1-1 cyp707a2-1	1	10	9	10/09/2018	2018	19/09/2018	2	39	39	7	207	200		16	20	0	cyp707a1-1 cyp707a2-1_1_2	0
cyp707a1-1 cyp707a2-1	1	10	9	10/09/2018	2018	19/09/2018	2	39	39	7	207	200		16	21	0	cyp707a1-1 cyp707a2-1_1_2	0
cyp707a1-1 cyp707a2-1	1	10	9	10/09/2018	2018	19/09/2018	2	39	39	7	207	200		16	22	0	cyp707a1-1 cyp707a2-1_1_2	0
cyp707a1-1 cyp707a2-1	1	10	9	10/09/2018	2018	19/09/2018	2	39	39	7	207	200		16	23	0	cyp707a1-1 cyp707a2-1_1_2	0
cyp707a1-1 cyp707a2-1	1	10	9	10/09/2018	2018	19/09/2018	2	39	39	7	207	200		16	24	0	cyp707a1-1 cyp707a2-1_1_2	0
cyp707a1-1 cyp707a2-1	1	10	9	10/09/2018	2018	19/09/2018	2	39	39	7	207	200		16	25	0	cyp707a1-1 cyp707a2-1_1_2	0
cyp707a1-1 cyp707a2-1	1	10	9	10/09/2018	2018	19/09/2018	2	39	39	7	207	200		16	26	0	cyp707a1-1 cyp707a2-1_1_2	0
cyp707a1-1 cyp707a2-1	1	10	9	10/09/2018	2018	19/09/2018	2	39	39	7	207	200		16	27	0	cyp707a1-1 cyp707a2-1_1_2	0
cyp707a1-1 cyp707a2-1	1	10	9	10/09/2018	2018	19/09/2018	2	39	39	7	207	200		16	28	0	cyp707a1-1 cyp707a2-1_1_2	0
cyp707a1-1 cyp707a2-1	1	10	9	10/09/2018	2018	19/09/2018	2	39	39	7	207	200		16	29	0	cyp707a1-1 cyp707a2-1_1_2	0
cyp707a1-1 cyp707a2-1	1	10	9	10/09/2018	2018	19/09/2018	2	39	39	7	207	200		16	30	0	cyp707a1-1 cyp707a2-1_1_2	0
cyp707a1-1 cyp707a2-1	1	10	9	10/09/2018	2018	19/09/2018	2	39	39	7	207	200		16	31	0	cyp707a1-1 cyp707a2-1_1_2	0
cyp707a1-1 cyp707a2-1	1	10	9	10/09/2018	2018	19/09/2018	2	39	39	7	207	200		16	32	0	cyp707a1-1 cyp707a2-1_1_2	0
cyp707a1-1 cyp707a2-1	1	10	9	10/09/2018	2018	19/09/2018	2	39	39	7	207	200		16	33	0	cyp707a1-1 cyp707a2-1_1_2	0
cyp707a1-1 cyp707a2-1	1	10	9	10/09/2018	2018	19/09/2018	2	39	39	7	207	200		16	34	0	cyp707a1-1 cyp707a2-1_1_2	0
cyp707a1-1 cyp707a2-1	1	10	9	10/09/2018	2018	19/09/2018	2	39	39	7	207	200		16	35	0	cyp707a1-1 cyp707a2-1_1_2	0
cyp707a1-1 cyp707a2-1	1	10	9	10/09/2018	2018	19/09/2018	2	39	39	7	207	200		16	36	0	cyp707a1-1 cyp707a2-1_1_2	0
cyp707a1-1 cyp707a2-1	1	10	9	10/09/2018	2018	19/09/2018	2	39	39	7	207	200		16	37	0	cyp707a1-1 cyp707a2-1_1_2	0
cyp707a1-1 cyp707a2-1	1	10	9	10/09/2018	2018	19/09/2018	2	39	39	7	207	200		16	38	0	cyp707a1-1 cyp707a2-1_1_2	0
cyp707a1-1 cyp707a2-1	1	10	9	10/09/2018	2018	19/09/2018	2	39	39	7	207	200		16	39	0	cyp707a1-1 cyp707a2-1_1_2	0
cyp707a1-1 cyp707a2-1	1	10	9	10/09/2018	2018	19/09/2018	2	39	39	7	207	200		16	40	0	cyp707a1-1 cyp707a2-1_1_2	0
cyp707a1-1 cyp707a2-1	1	10	9	10/09/2018	2018	19/09/2018	2	39	39	7	207	200		16	41	0	cyp707a1-1 cyp707a2-1_1_2	0
cyp707a1-1 cyp707a2-1	1	10	9	10/09/2018	2018	19/09/2018	2	39	39	7	207	200		16	42	0	cyp707a1-1 cyp707a2-1_1_2	0
cyp707a1-1 cyp707a2-1	1	10	9	10/09/2018	2018	19/09/2018	2	39	39	7	207	200		16	43	0	cyp707a1-1 cyp707a2-1_1_2	0
cyp707a1-1 cyp707a2-1	1	10	9	10/09/2018	2018	19/09/2018	2	39	39	7	207	200		16	44	0	cyp707a1-1 cyp707a2-1_1_2	0
cyp707a1-1 cyp707a2-1	1	10	9	10/09/2018	2018	19/09/2018	2	39	39	7	207	200		16	45	0	cyp707a1-1 cyp707a2-1_1_2	0
cyp707a1-1 cyp707a2-1	1	10	9	10/09/2018	2018	19/09/2018	2	39	39	7	207	200		16	46	0	cyp707a1-1 cyp707a2-1_1_2	0
cyp707a1-1 cyp707a2-1	1	10	9	10/09/2018	2018	19/09/2018	2	39	39	7	207	200		16	47	0	cyp707a1-1 cyp707a2-1_1_2	0
cyp707a1-1 cyp707a2-1	1	10	9	10/09/2018	2018	19/09/2018	2	39	39	7	207	200		16	48	0	cyp707a1-1 cyp707a2-1_1_2	0
cyp707a1-1 cyp707a2-1	2	10	9	10/09/2018	2018	19/09/2018	2	39	39	90	152	62		17	1	0	cyp707a1-1 cyp707a2-1_2_2	0
cyp707a1-1 cyp707a2-1	2	10	9	10/09/2018	2018	19/09/2018	2	39	39	90	152	62		17	2	0	cyp707a1-1 cyp707a2-1_2_2	0
cyp707a1-1 cyp707a2-1	2	10	9	10/09/2018	2018	19/09/2018	2	39	39	90	152	62		17	3	0	cyp707a1-1 cyp707a2-1_2_2	0
cyp707a1-1 cyp707a2-1	2	10	9	10/09/2018	2018	19/09/2018	2	39	39	90	152	62		17	4	3	cyp707a1-1 cyp707a2-1_2_2	1.97368421052632
cyp707a1-1 cyp707a2-1	2	10	9	10/09/2018	2018	19/09/2018	2	39	39	90	152	62		17	5	12	cyp707a1-1 cyp707a2-1_2_2	7.89473684210526
cyp707a1-1 cyp707a2-1	2	10	9	10/09/2018	2018	19/09/2018	2	39	39	90	152	62		17	6	7	cyp707a1-1 cyp707a2-1_2_2	4.60526315789474
cyp707a1-1 cyp707a2-1	2	10	9	10/09/2018	2018	19/09/2018	2	39	39	90	152	62		17	7	26	cyp707a1-1 cyp707a2-1_2_2	17.1052631578947
cyp707a1-1 cyp707a2-1	2	10	9	10/09/2018	2018	19/09/2018	2	39	39	90	152	62		17	8	7	cyp707a1-1 cyp707a2-1_2_2	4.60526315789474
cyp707a1-1 cyp707a2-1	2	10	9	10/09/2018	2018	19/09/2018	2	39	39	90	152	62		17	9	3	cyp707a1-1 cyp707a2-1_2_2	1.97368421052632
cyp707a1-1 cyp707a2-1	2	10	9	10/09/2018	2018	19/09/2018	2	39	39	90	152	62		17	10	5	cyp707a1-1 cyp707a2-1_2_2	3.28947368421053
cyp707a1-1 cyp707a2-1	2	10	9	10/09/2018	2018	19/09/2018	2	39	39	90	152	62		17	11	10	cyp707a1-1 cyp707a2-1_2_2	6.57894736842105
cyp707a1-1 cyp707a2-1	2	10	9	10/09/2018	2018	19/09/2018	2	39	39	90	152	62		17	12	0	cyp707a1-1 cyp707a2-1_2_2	0
cyp707a1-1 cyp707a2-1	2	10	9	10/09/2018	2018	19/09/2018	2	39	39	90	152	62		17	13	0	cyp707a1-1 cyp707a2-1_2_2	0
cyp707a1-1 cyp707a2-1	2	10	9	10/09/2018	2018	19/09/2018	2	39	39	90	152	62		17	14	7	cyp707a1-1 cyp707a2-1_2_2	4.60526315789474
cyp707a1-1 cyp707a2-1	2	10	9	10/09/2018	2018	19/09/2018	2	39	39	90	152	62		17	15	0	cyp707a1-1 cyp707a2-1_2_2	0
cyp707a1-1 cyp707a2-1	2	10	9	10/09/2018	2018	19/09/2018	2	39	39	90	152	62		17	16	7	cyp707a1-1 cyp707a2-1_2_2	4.60526315789474
cyp707a1-1 cyp707a2-1	2	10	9	10/09/2018	2018	19/09/2018	2	39	39	90	152	62		17	17	3	cyp707a1-1 cyp707a2-1_2_2	1.97368421052632
cyp707a1-1 cyp707a2-1	2	10	9	10/09/2018	2018	19/09/2018	2	39	39	90	152	62		17	18	0	cyp707a1-1 cyp707a2-1_2_2	0
cyp707a1-1 cyp707a2-1	2	10	9	10/09/2018	2018	19/09/2018	2	39	39	90	152	62		17	19	0	cyp707a1-1 cyp707a2-1_2_2	0
cyp707a1-1 cyp707a2-1	2	10	9	10/09/2018	2018	19/09/2018	2	39	39	90	152	62		17	20	0	cyp707a1-1 cyp707a2-1_2_2	0
cyp707a1-1 cyp707a2-1	2	10	9	10/09/2018	2018	19/09/2018	2	39	39	90	152	62		17	21	0	cyp707a1-1 cyp707a2-1_2_2	0
cyp707a1-1 cyp707a2-1	2	10	9	10/09/2018	2018	19/09/2018	2	39	39	90	152	62		17	22	0	cyp707a1-1 cyp707a2-1_2_2	0
cyp707a1-1 cyp707a2-1	2	10	9	10/09/2018	2018	19/09/2018	2	39	39	90	152	62		17	23	0	cyp707a1-1 cyp707a2-1_2_2	0
cyp707a1-1 cyp707a2-1	2	10	9	10/09/2018	2018	19/09/2018	2	39	39	90	152	62		17	24	0	cyp707a1-1 cyp707a2-1_2_2	0
cyp707a1-1 cyp707a2-1	2	10	9	10/09/2018	2018	19/09/2018	2	39	39	90	152	62		17	25	0	cyp707a1-1 cyp707a2-1_2_2	0
cyp707a1-1 cyp707a2-1	2	10	9	10/09/2018	2018	19/09/2018	2	39	39	90	152	62		17	26	0	cyp707a1-1 cyp707a2-1_2_2	0
cyp707a1-1 cyp707a2-1	2	10	9	10/09/2018	2018	19/09/2018	2	39	39	90	152	62		17	27	0	cyp707a1-1 cyp707a2-1_2_2	0
cyp707a1-1 cyp707a2-1	2	10	9	10/09/2018	2018	19/09/2018	2	39	39	90	152	62		17	28	0	cyp707a1-1 cyp707a2-1_2_2	0
cyp707a1-1 cyp707a2-1	2	10	9	10/09/2018	2018	19/09/2018	2	39	39	90	152	62		17	29	0	cyp707a1-1 cyp707a2-1_2_2	0
cyp707a1-1 cyp707a2-1	2	10	9	10/09/2018	2018	19/09/2018	2	39	39	90	152	62		17	30	0	cyp707a1-1 cyp707a2-1_2_2	0
cyp707a1-1 cyp707a2-1	2	10	9	10/09/2018	2018	19/09/2018	2	39	39	90	152	62		17	31	0	cyp707a1-1 cyp707a2-1_2_2	0
cyp707a1-1 cyp707a2-1	2	10	9	10/09/2018	2018	19/09/2018	2	39	39	90	152	62		17	32	0	cyp707a1-1 cyp707a2-1_2_2	0
cyp707a1-1 cyp707a2-1	2	10	9	10/09/2018	2018	19/09/2018	2	39	39	90	152	62		17	33	0	cyp707a1-1 cyp707a2-1_2_2	0
cyp707a1-1 cyp707a2-1	2	10	9	10/09/2018	2018	19/09/2018	2	39	39	90	152	62		17	34	0	cyp707a1-1 cyp707a2-1_2_2	0
cyp707a1-1 cyp707a2-1	2	10	9	10/09/2018	2018	19/09/2018	2	39	39	90	152	62		17	35	0	cyp707a1-1 cyp707a2-1_2_2	0
cyp707a1-1 cyp707a2-1	2	10	9	10/09/2018	2018	19/09/2018	2	39	39	90	152	62		17	36	0	cyp707a1-1 cyp707a2-1_2_2	0
cyp707a1-1 cyp707a2-1	2	10	9	10/09/2018	2018	19/09/2018	2	39	39	90	152	62		17	37	0	cyp707a1-1 cyp707a2-1_2_2	0
cyp707a1-1 cyp707a2-1	2	10	9	10/09/2018	2018	19/09/2018	2	39	39	90	152	62		17	38	0	cyp707a1-1 cyp707a2-1_2_2	0
cyp707a1-1 cyp707a2-1	2	10	9	10/09/2018	2018	19/09/2018	2	39	39	90	152	62		17	39	0	cyp707a1-1 cyp707a2-1_2_2	0
cyp707a1-1 cyp707a2-1	2	10	9	10/09/2018	2018	19/09/2018	2	39	39	90	152	62		17	40	0	cyp707a1-1 cyp707a2-1_2_2	0
cyp707a1-1 cyp707a2-1	2	10	9	10/09/2018	2018	19/09/2018	2	39	39	90	152	62		17	41	0	cyp707a1-1 cyp707a2-1_2_2	0
cyp707a1-1 cyp707a2-1	2	10	9	10/09/2018	2018	19/09/2018	2	39	39	90	152	62		17	42	0	cyp707a1-1 cyp707a2-1_2_2	0
cyp707a1-1 cyp707a2-1	2	10	9	10/09/2018	2018	19/09/2018	2	39	39	90	152	62		17	43	0	cyp707a1-1 cyp707a2-1_2_2	0
cyp707a1-1 cyp707a2-1	2	10	9	10/09/2018	2018	19/09/2018	2	39	39	90	152	62		17	44	0	cyp707a1-1 cyp707a2-1_2_2	0
cyp707a1-1 cyp707a2-1	2	10	9	10/09/2018	2018	19/09/2018	2	39	39	90	152	62		17	45	0	cyp707a1-1 cyp707a2-1_2_2	0
cyp707a1-1 cyp707a2-1	2	10	9	10/09/2018	2018	19/09/2018	2	39	39	90	152	62		17	46	0	cyp707a1-1 cyp707a2-1_2_2	0
cyp707a1-1 cyp707a2-1	2	10	9	10/09/2018	2018	19/09/2018	2	39	39	90	152	62		17	47	0	cyp707a1-1 cyp707a2-1_2_2	0
cyp707a1-1 cyp707a2-1	2	10	9	10/09/2018	2018	19/09/2018	2	39	39	90	152	62		17	48	0	cyp707a1-1 cyp707a2-1_2_2	0
cyp707a1-1 cyp707a2-1	3	10	9	10/09/2018	2018	19/09/2018	2	39	39	36	215	179		18	1	0	cyp707a1-1 cyp707a2-1_3_2	0
cyp707a1-1 cyp707a2-1	3	10	9	10/09/2018	2018	19/09/2018	2	39	39	36	215	179		18	2	0	cyp707a1-1 cyp707a2-1_3_2	0
cyp707a1-1 cyp707a2-1	3	10	9	10/09/2018	2018	19/09/2018	2	39	39	36	215	179		18	3	0	cyp707a1-1 cyp707a2-1_3_2	0
cyp707a1-1 cyp707a2-1	3	10	9	10/09/2018	2018	19/09/2018	2	39	39	36	215	179		18	4	3	cyp707a1-1 cyp707a2-1_3_2	1.3953488372093
cyp707a1-1 cyp707a2-1	3	10	9	10/09/2018	2018	19/09/2018	2	39	39	36	215	179		18	5	3	cyp707a1-1 cyp707a2-1_3_2	1.3953488372093
cyp707a1-1 cyp707a2-1	3	10	9	10/09/2018	2018	19/09/2018	2	39	39	36	215	179		18	6	4	cyp707a1-1 cyp707a2-1_3_2	1.86046511627907
cyp707a1-1 cyp707a2-1	3	10	9	10/09/2018	2018	19/09/2018	2	39	39	36	215	179		18	7	11	cyp707a1-1 cyp707a2-1_3_2	5.11627906976744
cyp707a1-1 cyp707a2-1	3	10	9	10/09/2018	2018	19/09/2018	2	39	39	36	215	179		18	8	5	cyp707a1-1 cyp707a2-1_3_2	2.32558139534884
cyp707a1-1 cyp707a2-1	3	10	9	10/09/2018	2018	19/09/2018	2	39	39	36	215	179		18	9	2	cyp707a1-1 cyp707a2-1_3_2	0.930232558139535
cyp707a1-1 cyp707a2-1	3	10	9	10/09/2018	2018	19/09/2018	2	39	39	36	215	179		18	10	2	cyp707a1-1 cyp707a2-1_3_2	0.930232558139535
cyp707a1-1 cyp707a2-1	3	10	9	10/09/2018	2018	19/09/2018	2	39	39	36	215	179		18	11	1	cyp707a1-1 cyp707a2-1_3_2	0.465116279069767
cyp707a1-1 cyp707a2-1	3	10	9	10/09/2018	2018	19/09/2018	2	39	39	36	215	179		18	12	0	cyp707a1-1 cyp707a2-1_3_2	0
cyp707a1-1 cyp707a2-1	3	10	9	10/09/2018	2018	19/09/2018	2	39	39	36	215	179		18	13	0	cyp707a1-1 cyp707a2-1_3_2	0
cyp707a1-1 cyp707a2-1	3	10	9	10/09/2018	2018	19/09/2018	2	39	39	36	215	179		18	14	5	cyp707a1-1 cyp707a2-1_3_2	2.32558139534884
cyp707a1-1 cyp707a2-1	3	10	9	10/09/2018	2018	19/09/2018	2	39	39	36	215	179		18	15	0	cyp707a1-1 cyp707a2-1_3_2	0
cyp707a1-1 cyp707a2-1	3	10	9	10/09/2018	2018	19/09/2018	2	39	39	36	215	179		18	16	0	cyp707a1-1 cyp707a2-1_3_2	0
cyp707a1-1 cyp707a2-1	3	10	9	10/09/2018	2018	19/09/2018	2	39	39	36	215	179		18	17	0	cyp707a1-1 cyp707a2-1_3_2	0
cyp707a1-1 cyp707a2-1	3	10	9	10/09/2018	2018	19/09/2018	2	39	39	36	215	179		18	18	0	cyp707a1-1 cyp707a2-1_3_2	0
cyp707a1-1 cyp707a2-1	3	10	9	10/09/2018	2018	19/09/2018	2	39	39	36	215	179		18	19	0	cyp707a1-1 cyp707a2-1_3_2	0
cyp707a1-1 cyp707a2-1	3	10	9	10/09/2018	2018	19/09/2018	2	39	39	36	215	179		18	20	0	cyp707a1-1 cyp707a2-1_3_2	0
cyp707a1-1 cyp707a2-1	3	10	9	10/09/2018	2018	19/09/2018	2	39	39	36	215	179		18	21	0	cyp707a1-1 cyp707a2-1_3_2	0
cyp707a1-1 cyp707a2-1	3	10	9	10/09/2018	2018	19/09/2018	2	39	39	36	215	179		18	22	0	cyp707a1-1 cyp707a2-1_3_2	0
cyp707a1-1 cyp707a2-1	3	10	9	10/09/2018	2018	19/09/2018	2	39	39	36	215	179		18	23	0	cyp707a1-1 cyp707a2-1_3_2	0
cyp707a1-1 cyp707a2-1	3	10	9	10/09/2018	2018	19/09/2018	2	39	39	36	215	179		18	24	0	cyp707a1-1 cyp707a2-1_3_2	0
cyp707a1-1 cyp707a2-1	3	10	9	10/09/2018	2018	19/09/2018	2	39	39	36	215	179		18	25	0	cyp707a1-1 cyp707a2-1_3_2	0
cyp707a1-1 cyp707a2-1	3	10	9	10/09/2018	2018	19/09/2018	2	39	39	36	215	179		18	26	0	cyp707a1-1 cyp707a2-1_3_2	0
cyp707a1-1 cyp707a2-1	3	10	9	10/09/2018	2018	19/09/2018	2	39	39	36	215	179		18	27	0	cyp707a1-1 cyp707a2-1_3_2	0
cyp707a1-1 cyp707a2-1	3	10	9	10/09/2018	2018	19/09/2018	2	39	39	36	215	179		18	28	0	cyp707a1-1 cyp707a2-1_3_2	0
cyp707a1-1 cyp707a2-1	3	10	9	10/09/2018	2018	19/09/2018	2	39	39	36	215	179		18	29	0	cyp707a1-1 cyp707a2-1_3_2	0
cyp707a1-1 cyp707a2-1	3	10	9	10/09/2018	2018	19/09/2018	2	39	39	36	215	179		18	30	0	cyp707a1-1 cyp707a2-1_3_2	0
cyp707a1-1 cyp707a2-1	3	10	9	10/09/2018	2018	19/09/2018	2	39	39	36	215	179		18	31	0	cyp707a1-1 cyp707a2-1_3_2	0
cyp707a1-1 cyp707a2-1	3	10	9	10/09/2018	2018	19/09/2018	2	39	39	36	215	179		18	32	0	cyp707a1-1 cyp707a2-1_3_2	0
cyp707a1-1 cyp707a2-1	3	10	9	10/09/2018	2018	19/09/2018	2	39	39	36	215	179		18	33	0	cyp707a1-1 cyp707a2-1_3_2	0
cyp707a1-1 cyp707a2-1	3	10	9	10/09/2018	2018	19/09/2018	2	39	39	36	215	179		18	34	0	cyp707a1-1 cyp707a2-1_3_2	0
cyp707a1-1 cyp707a2-1	3	10	9	10/09/2018	2018	19/09/2018	2	39	39	36	215	179		18	35	0	cyp707a1-1 cyp707a2-1_3_2	0
cyp707a1-1 cyp707a2-1	3	10	9	10/09/2018	2018	19/09/2018	2	39	39	36	215	179		18	36	0	cyp707a1-1 cyp707a2-1_3_2	0
cyp707a1-1 cyp707a2-1	3	10	9	10/09/2018	2018	19/09/2018	2	39	39	36	215	179		18	37	0	cyp707a1-1 cyp707a2-1_3_2	0
cyp707a1-1 cyp707a2-1	3	10	9	10/09/2018	2018	19/09/2018	2	39	39	36	215	179		18	38	0	cyp707a1-1 cyp707a2-1_3_2	0
cyp707a1-1 cyp707a2-1	3	10	9	10/09/2018	2018	19/09/2018	2	39	39	36	215	179		18	39	0	cyp707a1-1 cyp707a2-1_3_2	0
cyp707a1-1 cyp707a2-1	3	10	9	10/09/2018	2018	19/09/2018	2	39	39	36	215	179		18	40	0	cyp707a1-1 cyp707a2-1_3_2	0
cyp707a1-1 cyp707a2-1	3	10	9	10/09/2018	2018	19/09/2018	2	39	39	36	215	179		18	41	0	cyp707a1-1 cyp707a2-1_3_2	0
cyp707a1-1 cyp707a2-1	3	10	9	10/09/2018	2018	19/09/2018	2	39	39	36	215	179		18	42	0	cyp707a1-1 cyp707a2-1_3_2	0
cyp707a1-1 cyp707a2-1	3	10	9	10/09/2018	2018	19/09/2018	2	39	39	36	215	179		18	43	0	cyp707a1-1 cyp707a2-1_3_2	0
cyp707a1-1 cyp707a2-1	3	10	9	10/09/2018	2018	19/09/2018	2	39	39	36	215	179		18	44	0	cyp707a1-1 cyp707a2-1_3_2	0
cyp707a1-1 cyp707a2-1	3	10	9	10/09/2018	2018	19/09/2018	2	39	39	36	215	179		18	45	0	cyp707a1-1 cyp707a2-1_3_2	0
cyp707a1-1 cyp707a2-1	3	10	9	10/09/2018	2018	19/09/2018	2	39	39	36	215	179		18	46	0	cyp707a1-1 cyp707a2-1_3_2	0
cyp707a1-1 cyp707a2-1	3	10	9	10/09/2018	2018	19/09/2018	2	39	39	36	215	179		18	47	0	cyp707a1-1 cyp707a2-1_3_2	0
cyp707a1-1 cyp707a2-1	3	10	9	10/09/2018	2018	19/09/2018	2	39	39	36	215	179		18	48	0	cyp707a1-1 cyp707a2-1_3_2	0
ga3ox1	1	10	9	10/09/2018	2018	19/09/2018	2	35	35	200	203	3		4	1	0	ga3ox1_1_2	0
ga3ox1	1	10	9	10/09/2018	2018	19/09/2018	2	35	35	200	203	3		4	2	156	ga3ox1_1_2	76.8472906403941
ga3ox1	1	10	9	10/09/2018	2018	19/09/2018	2	35	35	200	203	3		4	3	42	ga3ox1_1_2	20.6896551724138
ga3ox1	1	10	9	10/09/2018	2018	19/09/2018	2	35	35	200	203	3		4	4	2	ga3ox1_1_2	0.985221674876847
ga3ox1	1	10	9	10/09/2018	2018	19/09/2018	2	35	35	200	203	3		4	5	0	ga3ox1_1_2	0
ga3ox1	1	10	9	10/09/2018	2018	19/09/2018	2	35	35	200	203	3		4	6	0	ga3ox1_1_2	0
ga3ox1	1	10	9	10/09/2018	2018	19/09/2018	2	35	35	200	203	3		4	7	0	ga3ox1_1_2	0
ga3ox1	1	10	9	10/09/2018	2018	19/09/2018	2	35	35	200	203	3		4	8	0	ga3ox1_1_2	0
ga3ox1	1	10	9	10/09/2018	2018	19/09/2018	2	35	35	200	203	3		4	9	0	ga3ox1_1_2	0
ga3ox1	1	10	9	10/09/2018	2018	19/09/2018	2	35	35	200	203	3		4	10	0	ga3ox1_1_2	0
ga3ox1	1	10	9	10/09/2018	2018	19/09/2018	2	35	35	200	203	3		4	11	0	ga3ox1_1_2	0
ga3ox1	1	10	9	10/09/2018	2018	19/09/2018	2	35	35	200	203	3		4	12	0	ga3ox1_1_2	0
ga3ox1	1	10	9	10/09/2018	2018	19/09/2018	2	35	35	200	203	3		4	13	0	ga3ox1_1_2	0
ga3ox1	1	10	9	10/09/2018	2018	19/09/2018	2	35	35	200	203	3		4	14	0	ga3ox1_1_2	0
ga3ox1	1	10	9	10/09/2018	2018	19/09/2018	2	35	35	200	203	3		4	15	0	ga3ox1_1_2	0
ga3ox1	1	10	9	10/09/2018	2018	19/09/2018	2	35	35	200	203	3		4	16	0	ga3ox1_1_2	0
ga3ox1	1	10	9	10/09/2018	2018	19/09/2018	2	35	35	200	203	3		4	17	0	ga3ox1_1_2	0
ga3ox1	1	10	9	10/09/2018	2018	19/09/2018	2	35	35	200	203	3		4	18	0	ga3ox1_1_2	0
ga3ox1	1	10	9	10/09/2018	2018	19/09/2018	2	35	35	200	203	3		4	19	0	ga3ox1_1_2	0
ga3ox1	1	10	9	10/09/2018	2018	19/09/2018	2	35	35	200	203	3		4	20	0	ga3ox1_1_2	0
ga3ox1	1	10	9	10/09/2018	2018	19/09/2018	2	35	35	200	203	3		4	21	0	ga3ox1_1_2	0
ga3ox1	1	10	9	10/09/2018	2018	19/09/2018	2	35	35	200	203	3		4	22	0	ga3ox1_1_2	0
ga3ox1	1	10	9	10/09/2018	2018	19/09/2018	2	35	35	200	203	3		4	23	0	ga3ox1_1_2	0
ga3ox1	1	10	9	10/09/2018	2018	19/09/2018	2	35	35	200	203	3		4	24	0	ga3ox1_1_2	0
ga3ox1	1	10	9	10/09/2018	2018	19/09/2018	2	35	35	200	203	3		4	25	0	ga3ox1_1_2	0
ga3ox1	1	10	9	10/09/2018	2018	19/09/2018	2	35	35	200	203	3		4	26	0	ga3ox1_1_2	0
ga3ox1	1	10	9	10/09/2018	2018	19/09/2018	2	35	35	200	203	3		4	27	0	ga3ox1_1_2	0
ga3ox1	1	10	9	10/09/2018	2018	19/09/2018	2	35	35	200	203	3		4	28	0	ga3ox1_1_2	0
ga3ox1	1	10	9	10/09/2018	2018	19/09/2018	2	35	35	200	203	3		4	29	0	ga3ox1_1_2	0
ga3ox1	1	10	9	10/09/2018	2018	19/09/2018	2	35	35	200	203	3		4	30	0	ga3ox1_1_2	0
ga3ox1	1	10	9	10/09/2018	2018	19/09/2018	2	35	35	200	203	3		4	31	0	ga3ox1_1_2	0
ga3ox1	1	10	9	10/09/2018	2018	19/09/2018	2	35	35	200	203	3		4	32	0	ga3ox1_1_2	0
ga3ox1	1	10	9	10/09/2018	2018	19/09/2018	2	35	35	200	203	3		4	33	0	ga3ox1_1_2	0
ga3ox1	1	10	9	10/09/2018	2018	19/09/2018	2	35	35	200	203	3		4	34	0	ga3ox1_1_2	0
ga3ox1	1	10	9	10/09/2018	2018	19/09/2018	2	35	35	200	203	3		4	35	0	ga3ox1_1_2	0
ga3ox1	1	10	9	10/09/2018	2018	19/09/2018	2	35	35	200	203	3		4	36	0	ga3ox1_1_2	0
ga3ox1	1	10	9	10/09/2018	2018	19/09/2018	2	35	35	200	203	3		4	37	0	ga3ox1_1_2	0
ga3ox1	1	10	9	10/09/2018	2018	19/09/2018	2	35	35	200	203	3		4	38	0	ga3ox1_1_2	0
ga3ox1	1	10	9	10/09/2018	2018	19/09/2018	2	35	35	200	203	3		4	39	0	ga3ox1_1_2	0
ga3ox1	1	10	9	10/09/2018	2018	19/09/2018	2	35	35	200	203	3		4	40	0	ga3ox1_1_2	0
ga3ox1	1	10	9	10/09/2018	2018	19/09/2018	2	35	35	200	203	3		4	41	0	ga3ox1_1_2	0
ga3ox1	1	10	9	10/09/2018	2018	19/09/2018	2	35	35	200	203	3		4	42	0	ga3ox1_1_2	0
ga3ox1	1	10	9	10/09/2018	2018	19/09/2018	2	35	35	200	203	3		4	43	0	ga3ox1_1_2	0
ga3ox1	1	10	9	10/09/2018	2018	19/09/2018	2	35	35	200	203	3		4	44	0	ga3ox1_1_2	0
ga3ox1	1	10	9	10/09/2018	2018	19/09/2018	2	35	35	200	203	3		4	45	0	ga3ox1_1_2	0
ga3ox1	1	10	9	10/09/2018	2018	19/09/2018	2	35	35	200	203	3		4	46	0	ga3ox1_1_2	0
ga3ox1	1	10	9	10/09/2018	2018	19/09/2018	2	35	35	200	203	3		4	47	0	ga3ox1_1_2	0
ga3ox1	1	10	9	10/09/2018	2018	19/09/2018	2	35	35	200	203	3		4	48	0	ga3ox1_1_2	0
ga3ox1	2	10	9	10/09/2018	2018	19/09/2018	2	35	35	244	248	4		5	1	0	ga3ox1_2_2	0
ga3ox1	2	10	9	10/09/2018	2018	19/09/2018	2	35	35	244	248	4		5	2	136	ga3ox1_2_2	54.8387096774194
ga3ox1	2	10	9	10/09/2018	2018	19/09/2018	2	35	35	244	248	4		5	3	85	ga3ox1_2_2	34.2741935483871
ga3ox1	2	10	9	10/09/2018	2018	19/09/2018	2	35	35	244	248	4		5	4	19	ga3ox1_2_2	7.66129032258065
ga3ox1	2	10	9	10/09/2018	2018	19/09/2018	2	35	35	244	248	4		5	5	4	ga3ox1_2_2	1.61290322580645
ga3ox1	2	10	9	10/09/2018	2018	19/09/2018	2	35	35	244	248	4		5	6	0	ga3ox1_2_2	0
ga3ox1	2	10	9	10/09/2018	2018	19/09/2018	2	35	35	244	248	4		5	7	0	ga3ox1_2_2	0
ga3ox1	2	10	9	10/09/2018	2018	19/09/2018	2	35	35	244	248	4		5	8	0	ga3ox1_2_2	0
ga3ox1	2	10	9	10/09/2018	2018	19/09/2018	2	35	35	244	248	4		5	9	0	ga3ox1_2_2	0
ga3ox1	2	10	9	10/09/2018	2018	19/09/2018	2	35	35	244	248	4		5	10	0	ga3ox1_2_2	0
ga3ox1	2	10	9	10/09/2018	2018	19/09/2018	2	35	35	244	248	4		5	11	0	ga3ox1_2_2	0
ga3ox1	2	10	9	10/09/2018	2018	19/09/2018	2	35	35	244	248	4		5	12	0	ga3ox1_2_2	0
ga3ox1	2	10	9	10/09/2018	2018	19/09/2018	2	35	35	244	248	4		5	13	0	ga3ox1_2_2	0
ga3ox1	2	10	9	10/09/2018	2018	19/09/2018	2	35	35	244	248	4		5	14	0	ga3ox1_2_2	0
ga3ox1	2	10	9	10/09/2018	2018	19/09/2018	2	35	35	244	248	4		5	15	0	ga3ox1_2_2	0
ga3ox1	2	10	9	10/09/2018	2018	19/09/2018	2	35	35	244	248	4		5	16	0	ga3ox1_2_2	0
ga3ox1	2	10	9	10/09/2018	2018	19/09/2018	2	35	35	244	248	4		5	17	0	ga3ox1_2_2	0
ga3ox1	2	10	9	10/09/2018	2018	19/09/2018	2	35	35	244	248	4		5	18	0	ga3ox1_2_2	0
ga3ox1	2	10	9	10/09/2018	2018	19/09/2018	2	35	35	244	248	4		5	19	0	ga3ox1_2_2	0
ga3ox1	2	10	9	10/09/2018	2018	19/09/2018	2	35	35	244	248	4		5	20	0	ga3ox1_2_2	0
ga3ox1	2	10	9	10/09/2018	2018	19/09/2018	2	35	35	244	248	4		5	21	0	ga3ox1_2_2	0
ga3ox1	2	10	9	10/09/2018	2018	19/09/2018	2	35	35	244	248	4		5	22	0	ga3ox1_2_2	0
ga3ox1	2	10	9	10/09/2018	2018	19/09/2018	2	35	35	244	248	4		5	23	0	ga3ox1_2_2	0
ga3ox1	2	10	9	10/09/2018	2018	19/09/2018	2	35	35	244	248	4		5	24	0	ga3ox1_2_2	0
ga3ox1	2	10	9	10/09/2018	2018	19/09/2018	2	35	35	244	248	4		5	25	0	ga3ox1_2_2	0
ga3ox1	2	10	9	10/09/2018	2018	19/09/2018	2	35	35	244	248	4		5	26	0	ga3ox1_2_2	0
ga3ox1	2	10	9	10/09/2018	2018	19/09/2018	2	35	35	244	248	4		5	27	0	ga3ox1_2_2	0
ga3ox1	2	10	9	10/09/2018	2018	19/09/2018	2	35	35	244	248	4		5	28	0	ga3ox1_2_2	0
ga3ox1	2	10	9	10/09/2018	2018	19/09/2018	2	35	35	244	248	4		5	29	0	ga3ox1_2_2	0
ga3ox1	2	10	9	10/09/2018	2018	19/09/2018	2	35	35	244	248	4		5	30	0	ga3ox1_2_2	0
ga3ox1	2	10	9	10/09/2018	2018	19/09/2018	2	35	35	244	248	4		5	31	0	ga3ox1_2_2	0
ga3ox1	2	10	9	10/09/2018	2018	19/09/2018	2	35	35	244	248	4		5	32	0	ga3ox1_2_2	0
ga3ox1	2	10	9	10/09/2018	2018	19/09/2018	2	35	35	244	248	4		5	33	0	ga3ox1_2_2	0
ga3ox1	2	10	9	10/09/2018	2018	19/09/2018	2	35	35	244	248	4		5	34	0	ga3ox1_2_2	0
ga3ox1	2	10	9	10/09/2018	2018	19/09/2018	2	35	35	244	248	4		5	35	0	ga3ox1_2_2	0
ga3ox1	2	10	9	10/09/2018	2018	19/09/2018	2	35	35	244	248	4		5	36	0	ga3ox1_2_2	0
ga3ox1	2	10	9	10/09/2018	2018	19/09/2018	2	35	35	244	248	4		5	37	0	ga3ox1_2_2	0
ga3ox1	2	10	9	10/09/2018	2018	19/09/2018	2	35	35	244	248	4		5	38	0	ga3ox1_2_2	0
ga3ox1	2	10	9	10/09/2018	2018	19/09/2018	2	35	35	244	248	4		5	39	0	ga3ox1_2_2	0
ga3ox1	2	10	9	10/09/2018	2018	19/09/2018	2	35	35	244	248	4		5	40	0	ga3ox1_2_2	0
ga3ox1	2	10	9	10/09/2018	2018	19/09/2018	2	35	35	244	248	4		5	41	0	ga3ox1_2_2	0
ga3ox1	2	10	9	10/09/2018	2018	19/09/2018	2	35	35	244	248	4		5	42	0	ga3ox1_2_2	0
ga3ox1	2	10	9	10/09/2018	2018	19/09/2018	2	35	35	244	248	4		5	43	0	ga3ox1_2_2	0
ga3ox1	2	10	9	10/09/2018	2018	19/09/2018	2	35	35	244	248	4		5	44	0	ga3ox1_2_2	0
ga3ox1	2	10	9	10/09/2018	2018	19/09/2018	2	35	35	244	248	4		5	45	0	ga3ox1_2_2	0
ga3ox1	2	10	9	10/09/2018	2018	19/09/2018	2	35	35	244	248	4		5	46	0	ga3ox1_2_2	0
ga3ox1	2	10	9	10/09/2018	2018	19/09/2018	2	35	35	244	248	4		5	47	0	ga3ox1_2_2	0
ga3ox1	2	10	9	10/09/2018	2018	19/09/2018	2	35	35	244	248	4		5	48	0	ga3ox1_2_2	0
ga3ox1	3	10	9	10/09/2018	2018	19/09/2018	2	35	35	203	208	5		6	1	0	ga3ox1_3_2	0
ga3ox1	3	10	9	10/09/2018	2018	19/09/2018	2	35	35	203	208	5		6	2	94	ga3ox1_3_2	45.1923076923077
ga3ox1	3	10	9	10/09/2018	2018	19/09/2018	2	35	35	203	208	5		6	3	84	ga3ox1_3_2	40.3846153846154
ga3ox1	3	10	9	10/09/2018	2018	19/09/2018	2	35	35	203	208	5		6	4	15	ga3ox1_3_2	7.21153846153846
ga3ox1	3	10	9	10/09/2018	2018	19/09/2018	2	35	35	203	208	5		6	5	10	ga3ox1_3_2	4.80769230769231
ga3ox1	3	10	9	10/09/2018	2018	19/09/2018	2	35	35	203	208	5		6	6	0	ga3ox1_3_2	0
ga3ox1	3	10	9	10/09/2018	2018	19/09/2018	2	35	35	203	208	5		6	7	0	ga3ox1_3_2	0
ga3ox1	3	10	9	10/09/2018	2018	19/09/2018	2	35	35	203	208	5		6	8	0	ga3ox1_3_2	0
ga3ox1	3	10	9	10/09/2018	2018	19/09/2018	2	35	35	203	208	5		6	9	0	ga3ox1_3_2	0
ga3ox1	3	10	9	10/09/2018	2018	19/09/2018	2	35	35	203	208	5		6	10	0	ga3ox1_3_2	0
ga3ox1	3	10	9	10/09/2018	2018	19/09/2018	2	35	35	203	208	5		6	11	0	ga3ox1_3_2	0
ga3ox1	3	10	9	10/09/2018	2018	19/09/2018	2	35	35	203	208	5		6	12	0	ga3ox1_3_2	0
ga3ox1	3	10	9	10/09/2018	2018	19/09/2018	2	35	35	203	208	5		6	13	0	ga3ox1_3_2	0
ga3ox1	3	10	9	10/09/2018	2018	19/09/2018	2	35	35	203	208	5		6	14	0	ga3ox1_3_2	0
ga3ox1	3	10	9	10/09/2018	2018	19/09/2018	2	35	35	203	208	5		6	15	0	ga3ox1_3_2	0
ga3ox1	3	10	9	10/09/2018	2018	19/09/2018	2	35	35	203	208	5		6	16	0	ga3ox1_3_2	0
ga3ox1	3	10	9	10/09/2018	2018	19/09/2018	2	35	35	203	208	5		6	17	0	ga3ox1_3_2	0
ga3ox1	3	10	9	10/09/2018	2018	19/09/2018	2	35	35	203	208	5		6	18	0	ga3ox1_3_2	0
ga3ox1	3	10	9	10/09/2018	2018	19/09/2018	2	35	35	203	208	5		6	19	0	ga3ox1_3_2	0
ga3ox1	3	10	9	10/09/2018	2018	19/09/2018	2	35	35	203	208	5		6	20	0	ga3ox1_3_2	0
ga3ox1	3	10	9	10/09/2018	2018	19/09/2018	2	35	35	203	208	5		6	21	0	ga3ox1_3_2	0
ga3ox1	3	10	9	10/09/2018	2018	19/09/2018	2	35	35	203	208	5		6	22	0	ga3ox1_3_2	0
ga3ox1	3	10	9	10/09/2018	2018	19/09/2018	2	35	35	203	208	5		6	23	0	ga3ox1_3_2	0
ga3ox1	3	10	9	10/09/2018	2018	19/09/2018	2	35	35	203	208	5		6	24	0	ga3ox1_3_2	0
ga3ox1	3	10	9	10/09/2018	2018	19/09/2018	2	35	35	203	208	5		6	25	0	ga3ox1_3_2	0
ga3ox1	3	10	9	10/09/2018	2018	19/09/2018	2	35	35	203	208	5		6	26	0	ga3ox1_3_2	0
ga3ox1	3	10	9	10/09/2018	2018	19/09/2018	2	35	35	203	208	5		6	27	0	ga3ox1_3_2	0
ga3ox1	3	10	9	10/09/2018	2018	19/09/2018	2	35	35	203	208	5		6	28	0	ga3ox1_3_2	0
ga3ox1	3	10	9	10/09/2018	2018	19/09/2018	2	35	35	203	208	5		6	29	0	ga3ox1_3_2	0
ga3ox1	3	10	9	10/09/2018	2018	19/09/2018	2	35	35	203	208	5		6	30	0	ga3ox1_3_2	0
ga3ox1	3	10	9	10/09/2018	2018	19/09/2018	2	35	35	203	208	5		6	31	0	ga3ox1_3_2	0
ga3ox1	3	10	9	10/09/2018	2018	19/09/2018	2	35	35	203	208	5		6	32	0	ga3ox1_3_2	0
ga3ox1	3	10	9	10/09/2018	2018	19/09/2018	2	35	35	203	208	5		6	33	0	ga3ox1_3_2	0
ga3ox1	3	10	9	10/09/2018	2018	19/09/2018	2	35	35	203	208	5		6	34	0	ga3ox1_3_2	0
ga3ox1	3	10	9	10/09/2018	2018	19/09/2018	2	35	35	203	208	5		6	35	0	ga3ox1_3_2	0
ga3ox1	3	10	9	10/09/2018	2018	19/09/2018	2	35	35	203	208	5		6	36	0	ga3ox1_3_2	0
ga3ox1	3	10	9	10/09/2018	2018	19/09/2018	2	35	35	203	208	5		6	37	0	ga3ox1_3_2	0
ga3ox1	3	10	9	10/09/2018	2018	19/09/2018	2	35	35	203	208	5		6	38	0	ga3ox1_3_2	0
ga3ox1	3	10	9	10/09/2018	2018	19/09/2018	2	35	35	203	208	5		6	39	0	ga3ox1_3_2	0
ga3ox1	3	10	9	10/09/2018	2018	19/09/2018	2	35	35	203	208	5		6	40	0	ga3ox1_3_2	0
ga3ox1	3	10	9	10/09/2018	2018	19/09/2018	2	35	35	203	208	5		6	41	0	ga3ox1_3_2	0
ga3ox1	3	10	9	10/09/2018	2018	19/09/2018	2	35	35	203	208	5		6	42	0	ga3ox1_3_2	0
ga3ox1	3	10	9	10/09/2018	2018	19/09/2018	2	35	35	203	208	5		6	43	0	ga3ox1_3_2	0
ga3ox1	3	10	9	10/09/2018	2018	19/09/2018	2	35	35	203	208	5		6	44	0	ga3ox1_3_2	0
ga3ox1	3	10	9	10/09/2018	2018	19/09/2018	2	35	35	203	208	5		6	45	0	ga3ox1_3_2	0
ga3ox1	3	10	9	10/09/2018	2018	19/09/2018	2	35	35	203	208	5		6	46	0	ga3ox1_3_2	0
ga3ox1	3	10	9	10/09/2018	2018	19/09/2018	2	35	35	203	208	5		6	47	0	ga3ox1_3_2	0
ga3ox1	3	10	9	10/09/2018	2018	19/09/2018	2	35	35	203	208	5		6	48	0	ga3ox1_3_2	0
ga3ox1ga3ox2	1	10	9	10/09/2018	2018	19/09/2018	2	25	25	91	186	95		13	1	0	ga3ox1ga3ox2_1_2	0
ga3ox1ga3ox2	1	10	9	10/09/2018	2018	19/09/2018	2	25	25	91	186	95		13	2	0	ga3ox1ga3ox2_1_2	0
ga3ox1ga3ox2	1	10	9	10/09/2018	2018	19/09/2018	2	25	25	91	186	95		13	3	6	ga3ox1ga3ox2_1_2	3.2258064516129
ga3ox1ga3ox2	1	10	9	10/09/2018	2018	19/09/2018	2	25	25	91	186	95		13	4	14	ga3ox1ga3ox2_1_2	7.52688172043011
ga3ox1ga3ox2	1	10	9	10/09/2018	2018	19/09/2018	2	25	25	91	186	95		13	5	36	ga3ox1ga3ox2_1_2	19.3548387096774
ga3ox1ga3ox2	1	10	9	10/09/2018	2018	19/09/2018	2	25	25	91	186	95		13	6	5	ga3ox1ga3ox2_1_2	2.68817204301075
ga3ox1ga3ox2	1	10	9	10/09/2018	2018	19/09/2018	2	25	25	91	186	95		13	7	13	ga3ox1ga3ox2_1_2	6.98924731182796
ga3ox1ga3ox2	1	10	9	10/09/2018	2018	19/09/2018	2	25	25	91	186	95		13	8	4	ga3ox1ga3ox2_1_2	2.1505376344086
ga3ox1ga3ox2	1	10	9	10/09/2018	2018	19/09/2018	2	25	25	91	186	95		13	9	4	ga3ox1ga3ox2_1_2	2.1505376344086
ga3ox1ga3ox2	1	10	9	10/09/2018	2018	19/09/2018	2	25	25	91	186	95		13	10	1	ga3ox1ga3ox2_1_2	0.537634408602151
ga3ox1ga3ox2	1	10	9	10/09/2018	2018	19/09/2018	2	25	25	91	186	95		13	11	5	ga3ox1ga3ox2_1_2	2.68817204301075
ga3ox1ga3ox2	1	10	9	10/09/2018	2018	19/09/2018	2	25	25	91	186	95		13	12	0	ga3ox1ga3ox2_1_2	0
ga3ox1ga3ox2	1	10	9	10/09/2018	2018	19/09/2018	2	25	25	91	186	95		13	13	0	ga3ox1ga3ox2_1_2	0
ga3ox1ga3ox2	1	10	9	10/09/2018	2018	19/09/2018	2	25	25	91	186	95		13	14	2	ga3ox1ga3ox2_1_2	1.0752688172043
ga3ox1ga3ox2	1	10	9	10/09/2018	2018	19/09/2018	2	25	25	91	186	95		13	15	0	ga3ox1ga3ox2_1_2	0
ga3ox1ga3ox2	1	10	9	10/09/2018	2018	19/09/2018	2	25	25	91	186	95		13	16	1	ga3ox1ga3ox2_1_2	0.537634408602151
ga3ox1ga3ox2	1	10	9	10/09/2018	2018	19/09/2018	2	25	25	91	186	95		13	17	0	ga3ox1ga3ox2_1_2	0
ga3ox1ga3ox2	1	10	9	10/09/2018	2018	19/09/2018	2	25	25	91	186	95		13	18	0	ga3ox1ga3ox2_1_2	0
ga3ox1ga3ox2	1	10	9	10/09/2018	2018	19/09/2018	2	25	25	91	186	95		13	19	0	ga3ox1ga3ox2_1_2	0
ga3ox1ga3ox2	1	10	9	10/09/2018	2018	19/09/2018	2	25	25	91	186	95		13	20	0	ga3ox1ga3ox2_1_2	0
ga3ox1ga3ox2	1	10	9	10/09/2018	2018	19/09/2018	2	25	25	91	186	95		13	21	0	ga3ox1ga3ox2_1_2	0
ga3ox1ga3ox2	1	10	9	10/09/2018	2018	19/09/2018	2	25	25	91	186	95		13	22	0	ga3ox1ga3ox2_1_2	0
ga3ox1ga3ox2	1	10	9	10/09/2018	2018	19/09/2018	2	25	25	91	186	95		13	23	0	ga3ox1ga3ox2_1_2	0
ga3ox1ga3ox2	1	10	9	10/09/2018	2018	19/09/2018	2	25	25	91	186	95		13	24	0	ga3ox1ga3ox2_1_2	0
ga3ox1ga3ox2	1	10	9	10/09/2018	2018	19/09/2018	2	25	25	91	186	95		13	25	0	ga3ox1ga3ox2_1_2	0
ga3ox1ga3ox2	1	10	9	10/09/2018	2018	19/09/2018	2	25	25	91	186	95		13	26	0	ga3ox1ga3ox2_1_2	0
ga3ox1ga3ox2	1	10	9	10/09/2018	2018	19/09/2018	2	25	25	91	186	95		13	27	0	ga3ox1ga3ox2_1_2	0
ga3ox1ga3ox2	1	10	9	10/09/2018	2018	19/09/2018	2	25	25	91	186	95		13	28	0	ga3ox1ga3ox2_1_2	0
ga3ox1ga3ox2	1	10	9	10/09/2018	2018	19/09/2018	2	25	25	91	186	95		13	29	0	ga3ox1ga3ox2_1_2	0
ga3ox1ga3ox2	1	10	9	10/09/2018	2018	19/09/2018	2	25	25	91	186	95		13	30	0	ga3ox1ga3ox2_1_2	0
ga3ox1ga3ox2	1	10	9	10/09/2018	2018	19/09/2018	2	25	25	91	186	95		13	31	0	ga3ox1ga3ox2_1_2	0
ga3ox1ga3ox2	1	10	9	10/09/2018	2018	19/09/2018	2	25	25	91	186	95		13	32	0	ga3ox1ga3ox2_1_2	0
ga3ox1ga3ox2	1	10	9	10/09/2018	2018	19/09/2018	2	25	25	91	186	95		13	33	0	ga3ox1ga3ox2_1_2	0
ga3ox1ga3ox2	1	10	9	10/09/2018	2018	19/09/2018	2	25	25	91	186	95		13	34	0	ga3ox1ga3ox2_1_2	0
ga3ox1ga3ox2	1	10	9	10/09/2018	2018	19/09/2018	2	25	25	91	186	95		13	35	0	ga3ox1ga3ox2_1_2	0
ga3ox1ga3ox2	1	10	9	10/09/2018	2018	19/09/2018	2	25	25	91	186	95		13	36	0	ga3ox1ga3ox2_1_2	0
ga3ox1ga3ox2	1	10	9	10/09/2018	2018	19/09/2018	2	25	25	91	186	95		13	37	0	ga3ox1ga3ox2_1_2	0
ga3ox1ga3ox2	1	10	9	10/09/2018	2018	19/09/2018	2	25	25	91	186	95		13	38	0	ga3ox1ga3ox2_1_2	0
ga3ox1ga3ox2	1	10	9	10/09/2018	2018	19/09/2018	2	25	25	91	186	95		13	39	0	ga3ox1ga3ox2_1_2	0
ga3ox1ga3ox2	1	10	9	10/09/2018	2018	19/09/2018	2	25	25	91	186	95		13	40	0	ga3ox1ga3ox2_1_2	0
ga3ox1ga3ox2	1	10	9	10/09/2018	2018	19/09/2018	2	25	25	91	186	95		13	41	0	ga3ox1ga3ox2_1_2	0
ga3ox1ga3ox2	1	10	9	10/09/2018	2018	19/09/2018	2	25	25	91	186	95		13	42	0	ga3ox1ga3ox2_1_2	0
ga3ox1ga3ox2	1	10	9	10/09/2018	2018	19/09/2018	2	25	25	91	186	95		13	43	0	ga3ox1ga3ox2_1_2	0
ga3ox1ga3ox2	1	10	9	10/09/2018	2018	19/09/2018	2	25	25	91	186	95		13	44	0	ga3ox1ga3ox2_1_2	0
ga3ox1ga3ox2	1	10	9	10/09/2018	2018	19/09/2018	2	25	25	91	186	95		13	45	0	ga3ox1ga3ox2_1_2	0
ga3ox1ga3ox2	1	10	9	10/09/2018	2018	19/09/2018	2	25	25	91	186	95		13	46	0	ga3ox1ga3ox2_1_2	0
ga3ox1ga3ox2	1	10	9	10/09/2018	2018	19/09/2018	2	25	25	91	186	95		13	47	0	ga3ox1ga3ox2_1_2	0
ga3ox1ga3ox2	1	10	9	10/09/2018	2018	19/09/2018	2	25	25	91	186	95		13	48	0	ga3ox1ga3ox2_1_2	0
ga3ox1ga3ox2	2	10	9	10/09/2018	2018	19/09/2018	2	25	25	65	219	154		14	1	0	ga3ox1ga3ox2_2_2	0
ga3ox1ga3ox2	2	10	9	10/09/2018	2018	19/09/2018	2	25	25	65	219	154		14	2	0	ga3ox1ga3ox2_2_2	0
ga3ox1ga3ox2	2	10	9	10/09/2018	2018	19/09/2018	2	25	25	65	219	154		14	3	2	ga3ox1ga3ox2_2_2	0.91324200913242
ga3ox1ga3ox2	2	10	9	10/09/2018	2018	19/09/2018	2	25	25	65	219	154		14	4	19	ga3ox1ga3ox2_2_2	8.67579908675799
ga3ox1ga3ox2	2	10	9	10/09/2018	2018	19/09/2018	2	25	25	65	219	154		14	5	11	ga3ox1ga3ox2_2_2	5.02283105022831
ga3ox1ga3ox2	2	10	9	10/09/2018	2018	19/09/2018	2	25	25	65	219	154		14	6	7	ga3ox1ga3ox2_2_2	3.19634703196347
ga3ox1ga3ox2	2	10	9	10/09/2018	2018	19/09/2018	2	25	25	65	219	154		14	7	6	ga3ox1ga3ox2_2_2	2.73972602739726
ga3ox1ga3ox2	2	10	9	10/09/2018	2018	19/09/2018	2	25	25	65	219	154		14	8	7	ga3ox1ga3ox2_2_2	3.19634703196347
ga3ox1ga3ox2	2	10	9	10/09/2018	2018	19/09/2018	2	25	25	65	219	154		14	9	3	ga3ox1ga3ox2_2_2	1.36986301369863
ga3ox1ga3ox2	2	10	9	10/09/2018	2018	19/09/2018	2	25	25	65	219	154		14	10	2	ga3ox1ga3ox2_2_2	0.91324200913242
ga3ox1ga3ox2	2	10	9	10/09/2018	2018	19/09/2018	2	25	25	65	219	154		14	11	4	ga3ox1ga3ox2_2_2	1.82648401826484
ga3ox1ga3ox2	2	10	9	10/09/2018	2018	19/09/2018	2	25	25	65	219	154		14	12	0	ga3ox1ga3ox2_2_2	0
ga3ox1ga3ox2	2	10	9	10/09/2018	2018	19/09/2018	2	25	25	65	219	154		14	13	0	ga3ox1ga3ox2_2_2	0
ga3ox1ga3ox2	2	10	9	10/09/2018	2018	19/09/2018	2	25	25	65	219	154		14	14	1	ga3ox1ga3ox2_2_2	0.45662100456621
ga3ox1ga3ox2	2	10	9	10/09/2018	2018	19/09/2018	2	25	25	65	219	154		14	15	0	ga3ox1ga3ox2_2_2	0
ga3ox1ga3ox2	2	10	9	10/09/2018	2018	19/09/2018	2	25	25	65	219	154		14	16	3	ga3ox1ga3ox2_2_2	1.36986301369863
ga3ox1ga3ox2	2	10	9	10/09/2018	2018	19/09/2018	2	25	25	65	219	154		14	17	0	ga3ox1ga3ox2_2_2	0
ga3ox1ga3ox2	2	10	9	10/09/2018	2018	19/09/2018	2	25	25	65	219	154		14	18	0	ga3ox1ga3ox2_2_2	0
ga3ox1ga3ox2	2	10	9	10/09/2018	2018	19/09/2018	2	25	25	65	219	154		14	19	0	ga3ox1ga3ox2_2_2	0
ga3ox1ga3ox2	2	10	9	10/09/2018	2018	19/09/2018	2	25	25	65	219	154		14	20	0	ga3ox1ga3ox2_2_2	0
ga3ox1ga3ox2	2	10	9	10/09/2018	2018	19/09/2018	2	25	25	65	219	154		14	21	0	ga3ox1ga3ox2_2_2	0
ga3ox1ga3ox2	2	10	9	10/09/2018	2018	19/09/2018	2	25	25	65	219	154		14	22	0	ga3ox1ga3ox2_2_2	0
ga3ox1ga3ox2	2	10	9	10/09/2018	2018	19/09/2018	2	25	25	65	219	154		14	23	0	ga3ox1ga3ox2_2_2	0
ga3ox1ga3ox2	2	10	9	10/09/2018	2018	19/09/2018	2	25	25	65	219	154		14	24	0	ga3ox1ga3ox2_2_2	0
ga3ox1ga3ox2	2	10	9	10/09/2018	2018	19/09/2018	2	25	25	65	219	154		14	25	0	ga3ox1ga3ox2_2_2	0
ga3ox1ga3ox2	2	10	9	10/09/2018	2018	19/09/2018	2	25	25	65	219	154		14	26	0	ga3ox1ga3ox2_2_2	0
ga3ox1ga3ox2	2	10	9	10/09/2018	2018	19/09/2018	2	25	25	65	219	154		14	27	0	ga3ox1ga3ox2_2_2	0
ga3ox1ga3ox2	2	10	9	10/09/2018	2018	19/09/2018	2	25	25	65	219	154		14	28	0	ga3ox1ga3ox2_2_2	0
ga3ox1ga3ox2	2	10	9	10/09/2018	2018	19/09/2018	2	25	25	65	219	154		14	29	0	ga3ox1ga3ox2_2_2	0
ga3ox1ga3ox2	2	10	9	10/09/2018	2018	19/09/2018	2	25	25	65	219	154		14	30	0	ga3ox1ga3ox2_2_2	0
ga3ox1ga3ox2	2	10	9	10/09/2018	2018	19/09/2018	2	25	25	65	219	154		14	31	0	ga3ox1ga3ox2_2_2	0
ga3ox1ga3ox2	2	10	9	10/09/2018	2018	19/09/2018	2	25	25	65	219	154		14	32	0	ga3ox1ga3ox2_2_2	0
ga3ox1ga3ox2	2	10	9	10/09/2018	2018	19/09/2018	2	25	25	65	219	154		14	33	0	ga3ox1ga3ox2_2_2	0
ga3ox1ga3ox2	2	10	9	10/09/2018	2018	19/09/2018	2	25	25	65	219	154		14	34	0	ga3ox1ga3ox2_2_2	0
ga3ox1ga3ox2	2	10	9	10/09/2018	2018	19/09/2018	2	25	25	65	219	154		14	35	0	ga3ox1ga3ox2_2_2	0
ga3ox1ga3ox2	2	10	9	10/09/2018	2018	19/09/2018	2	25	25	65	219	154		14	36	0	ga3ox1ga3ox2_2_2	0
ga3ox1ga3ox2	2	10	9	10/09/2018	2018	19/09/2018	2	25	25	65	219	154		14	37	0	ga3ox1ga3ox2_2_2	0
ga3ox1ga3ox2	2	10	9	10/09/2018	2018	19/09/2018	2	25	25	65	219	154		14	38	0	ga3ox1ga3ox2_2_2	0
ga3ox1ga3ox2	2	10	9	10/09/2018	2018	19/09/2018	2	25	25	65	219	154		14	39	0	ga3ox1ga3ox2_2_2	0
ga3ox1ga3ox2	2	10	9	10/09/2018	2018	19/09/2018	2	25	25	65	219	154		14	40	0	ga3ox1ga3ox2_2_2	0
ga3ox1ga3ox2	2	10	9	10/09/2018	2018	19/09/2018	2	25	25	65	219	154		14	41	0	ga3ox1ga3ox2_2_2	0
ga3ox1ga3ox2	2	10	9	10/09/2018	2018	19/09/2018	2	25	25	65	219	154		14	42	0	ga3ox1ga3ox2_2_2	0
ga3ox1ga3ox2	2	10	9	10/09/2018	2018	19/09/2018	2	25	25	65	219	154		14	43	0	ga3ox1ga3ox2_2_2	0
ga3ox1ga3ox2	2	10	9	10/09/2018	2018	19/09/2018	2	25	25	65	219	154		14	44	0	ga3ox1ga3ox2_2_2	0
ga3ox1ga3ox2	2	10	9	10/09/2018	2018	19/09/2018	2	25	25	65	219	154		14	45	0	ga3ox1ga3ox2_2_2	0
ga3ox1ga3ox2	2	10	9	10/09/2018	2018	19/09/2018	2	25	25	65	219	154		14	46	0	ga3ox1ga3ox2_2_2	0
ga3ox1ga3ox2	2	10	9	10/09/2018	2018	19/09/2018	2	25	25	65	219	154		14	47	0	ga3ox1ga3ox2_2_2	0
ga3ox1ga3ox2	2	10	9	10/09/2018	2018	19/09/2018	2	25	25	65	219	154		14	48	0	ga3ox1ga3ox2_2_2	0
ga3ox1ga3ox2	3	10	9	10/09/2018	2018	19/09/2018	2	25	25	63	246	183		15	1	0	ga3ox1ga3ox2_3_2	0
ga3ox1ga3ox2	3	10	9	10/09/2018	2018	19/09/2018	2	25	25	63	246	183		15	2	0	ga3ox1ga3ox2_3_2	0
ga3ox1ga3ox2	3	10	9	10/09/2018	2018	19/09/2018	2	25	25	63	246	183		15	3	0	ga3ox1ga3ox2_3_2	0
ga3ox1ga3ox2	3	10	9	10/09/2018	2018	19/09/2018	2	25	25	63	246	183		15	4	3	ga3ox1ga3ox2_3_2	1.21951219512195
ga3ox1ga3ox2	3	10	9	10/09/2018	2018	19/09/2018	2	25	25	63	246	183		15	5	16	ga3ox1ga3ox2_3_2	6.50406504065041
ga3ox1ga3ox2	3	10	9	10/09/2018	2018	19/09/2018	2	25	25	63	246	183		15	6	0	ga3ox1ga3ox2_3_2	0
ga3ox1ga3ox2	3	10	9	10/09/2018	2018	19/09/2018	2	25	25	63	246	183		15	7	9	ga3ox1ga3ox2_3_2	3.65853658536585
ga3ox1ga3ox2	3	10	9	10/09/2018	2018	19/09/2018	2	25	25	63	246	183		15	8	16	ga3ox1ga3ox2_3_2	6.50406504065041
ga3ox1ga3ox2	3	10	9	10/09/2018	2018	19/09/2018	2	25	25	63	246	183		15	9	4	ga3ox1ga3ox2_3_2	1.6260162601626
ga3ox1ga3ox2	3	10	9	10/09/2018	2018	19/09/2018	2	25	25	63	246	183		15	10	2	ga3ox1ga3ox2_3_2	0.813008130081301
ga3ox1ga3ox2	3	10	9	10/09/2018	2018	19/09/2018	2	25	25	63	246	183		15	11	6	ga3ox1ga3ox2_3_2	2.4390243902439
ga3ox1ga3ox2	3	10	9	10/09/2018	2018	19/09/2018	2	25	25	63	246	183		15	12	0	ga3ox1ga3ox2_3_2	0
ga3ox1ga3ox2	3	10	9	10/09/2018	2018	19/09/2018	2	25	25	63	246	183		15	13	0	ga3ox1ga3ox2_3_2	0
ga3ox1ga3ox2	3	10	9	10/09/2018	2018	19/09/2018	2	25	25	63	246	183		15	14	5	ga3ox1ga3ox2_3_2	2.03252032520325
ga3ox1ga3ox2	3	10	9	10/09/2018	2018	19/09/2018	2	25	25	63	246	183		15	15	0	ga3ox1ga3ox2_3_2	0
ga3ox1ga3ox2	3	10	9	10/09/2018	2018	19/09/2018	2	25	25	63	246	183		15	16	0	ga3ox1ga3ox2_3_2	0
ga3ox1ga3ox2	3	10	9	10/09/2018	2018	19/09/2018	2	25	25	63	246	183		15	17	2	ga3ox1ga3ox2_3_2	0.813008130081301
ga3ox1ga3ox2	3	10	9	10/09/2018	2018	19/09/2018	2	25	25	63	246	183		15	18	0	ga3ox1ga3ox2_3_2	0
ga3ox1ga3ox2	3	10	9	10/09/2018	2018	19/09/2018	2	25	25	63	246	183		15	19	0	ga3ox1ga3ox2_3_2	0
ga3ox1ga3ox2	3	10	9	10/09/2018	2018	19/09/2018	2	25	25	63	246	183		15	20	0	ga3ox1ga3ox2_3_2	0
ga3ox1ga3ox2	3	10	9	10/09/2018	2018	19/09/2018	2	25	25	63	246	183		15	21	0	ga3ox1ga3ox2_3_2	0
ga3ox1ga3ox2	3	10	9	10/09/2018	2018	19/09/2018	2	25	25	63	246	183		15	22	0	ga3ox1ga3ox2_3_2	0
ga3ox1ga3ox2	3	10	9	10/09/2018	2018	19/09/2018	2	25	25	63	246	183		15	23	0	ga3ox1ga3ox2_3_2	0
ga3ox1ga3ox2	3	10	9	10/09/2018	2018	19/09/2018	2	25	25	63	246	183		15	24	0	ga3ox1ga3ox2_3_2	0
ga3ox1ga3ox2	3	10	9	10/09/2018	2018	19/09/2018	2	25	25	63	246	183		15	25	0	ga3ox1ga3ox2_3_2	0
ga3ox1ga3ox2	3	10	9	10/09/2018	2018	19/09/2018	2	25	25	63	246	183		15	26	0	ga3ox1ga3ox2_3_2	0
ga3ox1ga3ox2	3	10	9	10/09/2018	2018	19/09/2018	2	25	25	63	246	183		15	27	0	ga3ox1ga3ox2_3_2	0
ga3ox1ga3ox2	3	10	9	10/09/2018	2018	19/09/2018	2	25	25	63	246	183		15	28	0	ga3ox1ga3ox2_3_2	0
ga3ox1ga3ox2	3	10	9	10/09/2018	2018	19/09/2018	2	25	25	63	246	183		15	29	0	ga3ox1ga3ox2_3_2	0
ga3ox1ga3ox2	3	10	9	10/09/2018	2018	19/09/2018	2	25	25	63	246	183		15	30	0	ga3ox1ga3ox2_3_2	0
ga3ox1ga3ox2	3	10	9	10/09/2018	2018	19/09/2018	2	25	25	63	246	183		15	31	0	ga3ox1ga3ox2_3_2	0
ga3ox1ga3ox2	3	10	9	10/09/2018	2018	19/09/2018	2	25	25	63	246	183		15	32	0	ga3ox1ga3ox2_3_2	0
ga3ox1ga3ox2	3	10	9	10/09/2018	2018	19/09/2018	2	25	25	63	246	183		15	33	0	ga3ox1ga3ox2_3_2	0
ga3ox1ga3ox2	3	10	9	10/09/2018	2018	19/09/2018	2	25	25	63	246	183		15	34	0	ga3ox1ga3ox2_3_2	0
ga3ox1ga3ox2	3	10	9	10/09/2018	2018	19/09/2018	2	25	25	63	246	183		15	35	0	ga3ox1ga3ox2_3_2	0
ga3ox1ga3ox2	3	10	9	10/09/2018	2018	19/09/2018	2	25	25	63	246	183		15	36	0	ga3ox1ga3ox2_3_2	0
ga3ox1ga3ox2	3	10	9	10/09/2018	2018	19/09/2018	2	25	25	63	246	183		15	37	0	ga3ox1ga3ox2_3_2	0
ga3ox1ga3ox2	3	10	9	10/09/2018	2018	19/09/2018	2	25	25	63	246	183		15	38	0	ga3ox1ga3ox2_3_2	0
ga3ox1ga3ox2	3	10	9	10/09/2018	2018	19/09/2018	2	25	25	63	246	183		15	39	0	ga3ox1ga3ox2_3_2	0
ga3ox1ga3ox2	3	10	9	10/09/2018	2018	19/09/2018	2	25	25	63	246	183		15	40	0	ga3ox1ga3ox2_3_2	0
ga3ox1ga3ox2	3	10	9	10/09/2018	2018	19/09/2018	2	25	25	63	246	183		15	41	0	ga3ox1ga3ox2_3_2	0
ga3ox1ga3ox2	3	10	9	10/09/2018	2018	19/09/2018	2	25	25	63	246	183		15	42	0	ga3ox1ga3ox2_3_2	0
ga3ox1ga3ox2	3	10	9	10/09/2018	2018	19/09/2018	2	25	25	63	246	183		15	43	0	ga3ox1ga3ox2_3_2	0
ga3ox1ga3ox2	3	10	9	10/09/2018	2018	19/09/2018	2	25	25	63	246	183		15	44	0	ga3ox1ga3ox2_3_2	0
ga3ox1ga3ox2	3	10	9	10/09/2018	2018	19/09/2018	2	25	25	63	246	183		15	45	0	ga3ox1ga3ox2_3_2	0
ga3ox1ga3ox2	3	10	9	10/09/2018	2018	19/09/2018	2	25	25	63	246	183		15	46	0	ga3ox1ga3ox2_3_2	0
ga3ox1ga3ox2	3	10	9	10/09/2018	2018	19/09/2018	2	25	25	63	246	183		15	47	0	ga3ox1ga3ox2_3_2	0
ga3ox1ga3ox2	3	10	9	10/09/2018	2018	19/09/2018	2	25	25	63	246	183		15	48	0	ga3ox1ga3ox2_3_2	0
