# Supplementary material for: An ABA-GA bistable switch can account for natural variation in the variability of Arabidopsis seed germination time
Source: eLife. 2021 Jun 1;10:e59485. doi: 10.7554/eLife.59485 (PMC8169117; doi:10.7554/eLife.59485)
Supplement: Supplementary file 1. [file elife-59485-supp1.csv]

Magic_line	Plant	Sowing.day	Sowing.month	Sowing_date	Year	Scoring.date	Mother.plant.sowing.number	DAR	MeanDAR	Total.germinated	Total	NonGer	id	RepNumber	day	number	name	perc	perc_total_ger	group
M101	1	7	3	7-Mar	2016		3	33	33	86	162	76	10	2	1	0	M101_07-Mar_1	0	0	magic
M101	1	7	3	7-Mar	2016		3	33	33	86	162	76	10	2	2	0	M101_07-Mar_1	0	0	magic
M101	1	7	3	7-Mar	2016		3	33	33	86	162	76	10	2	3	0	M101_07-Mar_1	0	0	magic
M101	1	7	3	7-Mar	2016		3	33	33	86	162	76	10	2	4	7	M101_07-Mar_1	4.320987654	8.139534884	magic
M101	1	7	3	7-Mar	2016		3	33	33	86	162	76	10	2	5	9	M101_07-Mar_1	5.555555556	10.46511628	magic
M101	1	7	3	7-Mar	2016		3	33	33	86	162	76	10	2	6	3	M101_07-Mar_1	1.851851852	3.488372093	magic
M101	1	7	3	7-Mar	2016		3	33	33	86	162	76	10	2	7	8	M101_07-Mar_1	4.938271605	9.302325581	magic
M101	1	7	3	7-Mar	2016		3	33	33	86	162	76	10	2	8	10	M101_07-Mar_1	6.172839506	11.62790698	magic
M101	1	7	3	7-Mar	2016		3	33	33	86	162	76	10	2	9	9	M101_07-Mar_1	5.555555556	10.46511628	magic
M101	1	7	3	7-Mar	2016		3	33	33	86	162	76	10	2	10	0	M101_07-Mar_1	0	0	magic
M101	1	7	3	7-Mar	2016		3	33	33	86	162	76	10	2	11	31	M101_07-Mar_1	19.13580247	36.04651163	magic
M101	1	7	3	7-Mar	2016		3	33	33	86	162	76	10	2	12	8	M101_07-Mar_1	4.938271605	9.302325581	magic
M101	1	7	3	7-Mar	2016		3	33	33	86	162	76	10	2	13	1	M101_07-Mar_1	0.617283951	1.162790698	magic
M101	1	7	3	7-Mar	2016		3	33	33	86	162	76	10	2	14	0	M101_07-Mar_1	0	0	magic
M101	1	7	3	7-Mar	2016		3	33	33	86	162	76	10	2	15	0	M101_07-Mar_1	0	0	magic
M101	1a	11	11	11-Nov	2016	31/01/2017	13	42	42	86	95	9	39	3	1	0	M101_11-Nov_1a	0	0	magic
M101	1a	11	11	11-Nov	2016	31/01/2017	13	42	42	86	95	9	39	3	2	2	M101_11-Nov_1a	2.105263158	2.325581395	magic
M101	1a	11	11	11-Nov	2016	31/01/2017	13	42	42	86	95	9	39	3	3	29	M101_11-Nov_1a	30.52631579	33.72093023	magic
M101	1a	11	11	11-Nov	2016	31/01/2017	13	42	42	86	95	9	39	3	4	23	M101_11-Nov_1a	24.21052632	26.74418605	magic
M101	1a	11	11	11-Nov	2016	31/01/2017	13	42	42	86	95	9	39	3	5	16	M101_11-Nov_1a	16.84210526	18.60465116	magic
M101	1a	11	11	11-Nov	2016	31/01/2017	13	42	42	86	95	9	39	3	6	3	M101_11-Nov_1a	3.157894737	3.488372093	magic
M101	1a	11	11	11-Nov	2016	31/01/2017	13	42	42	86	95	9	39	3	7	2	M101_11-Nov_1a	2.105263158	2.325581395	magic
M101	1a	11	11	11-Nov	2016	31/01/2017	13	42	42	86	95	9	39	3	8	4	M101_11-Nov_1a	4.210526316	4.651162791	magic
M101	1a	11	11	11-Nov	2016	31/01/2017	13	42	42	86	95	9	39	3	9	1	M101_11-Nov_1a	1.052631579	1.162790698	magic
M101	1a	11	11	11-Nov	2016	31/01/2017	13	42	42	86	95	9	39	3	10	0	M101_11-Nov_1a	0	0	magic
M101	1a	11	11	11-Nov	2016	31/01/2017	13	42	42	86	95	9	39	3	11	0	M101_11-Nov_1a	0	0	magic
M101	1a	11	11	11-Nov	2016	31/01/2017	13	42	42	86	95	9	39	3	12	0	M101_11-Nov_1a	0	0	magic
M101	1a	11	11	11-Nov	2016	31/01/2017	13	42	42	86	95	9	39	3	13	0	M101_11-Nov_1a	0	0	magic
M101	1a	11	11	11-Nov	2016	31/01/2017	13	42	42	86	95	9	39	3	14	0	M101_11-Nov_1a	0	0	magic
M101	1a	11	11	11-Nov	2016	31/01/2017	13	42	42	86	95	9	39	3	15	0	M101_11-Nov_1a	0	0	magic
M101	1a	11	11	11-Nov	2016	31/01/2017	13	42	42	86	95	9	39	3	16	0	M101_11-Nov_1a	0	0	magic
M101	1a	11	11	11-Nov	2016	31/01/2017	13	42	42	86	95	9	39	3	17	0	M101_11-Nov_1a	0	0	magic
M101	1a	11	11	11-Nov	2016	31/01/2017	13	42	42	86	95	9	39	3	18	0	M101_11-Nov_1a	0	0	magic
M101	1a	11	11	11-Nov	2016	31/01/2017	13	42	42	86	95	9	39	3	19	0	M101_11-Nov_1a	0	0	magic
M101	1a	11	11	11-Nov	2016	31/01/2017	13	42	42	86	95	9	39	3	20	0	M101_11-Nov_1a	0	0	magic
M101	1a	11	11	11-Nov	2016	31/01/2017	13	42	42	86	95	9	39	3	21	0	M101_11-Nov_1a	0	0	magic
M101	1a	11	11	11-Nov	2016	31/01/2017	13	42	42	86	95	9	39	3	22	0	M101_11-Nov_1a	0	0	magic
M101	1a	11	11	11-Nov	2016	31/01/2017	13	42	42	86	95	9	39	3	23	0	M101_11-Nov_1a	0	0	magic
M101	1a	11	11	11-Nov	2016	31/01/2017	13	42	42	86	95	9	39	3	24	0	M101_11-Nov_1a	0	0	magic
M101	1a	11	11	11-Nov	2016	31/01/2017	13	42	42	86	95	9	39	3	25	0	M101_11-Nov_1a	0	0	magic
M101	1a	11	11	11-Nov	2016	31/01/2017	13	42	42	86	95	9	39	3	26	0	M101_11-Nov_1a	0	0	magic
M101	1a	11	11	11-Nov	2016	31/01/2017	13	42	42	86	95	9	39	3	27	0	M101_11-Nov_1a	0	0	magic
M101	1a	11	11	11-Nov	2016	31/01/2017	13	42	42	86	95	9	39	3	28	0	M101_11-Nov_1a	0	0	magic
M101	1a	11	11	11-Nov	2016	31/01/2017	13	42	42	86	95	9	39	3	29	0	M101_11-Nov_1a	0	0	magic
M101	1a	11	11	11-Nov	2016	31/01/2017	13	42	42	86	95	9	39	3	30	0	M101_11-Nov_1a	0	0	magic
M101	1a	11	11	11-Nov	2016	31/01/2017	13	42	42	86	95	9	39	3	31	0	M101_11-Nov_1a	0	0	magic
M101	1a	11	11	11-Nov	2016	31/01/2017	13	42	42	86	95	9	39	3	32	0	M101_11-Nov_1a	0	0	magic
M101	1a	11	11	11-Nov	2016	31/01/2017	13	42	42	86	95	9	39	3	33	0	M101_11-Nov_1a	0	0	magic
M101	1a	11	11	11-Nov	2016	31/01/2017	13	42	42	86	95	9	39	3	34	0	M101_11-Nov_1a	0	0	magic
M101	1a	11	11	11-Nov	2016	31/01/2017	13	42	42	86	95	9	39	3	35	0	M101_11-Nov_1a	0	0	magic
M101	1a	11	11	11-Nov	2016	31/01/2017	13	42	42	86	95	9	39	3	36	0	M101_11-Nov_1a	0	0	magic
M101	1a	11	11	11-Nov	2016	31/01/2017	13	42	42	86	95	9	39	3	37	0	M101_11-Nov_1a	0	0	magic
M101	1a	11	11	11-Nov	2016	31/01/2017	13	42	42	86	95	9	39	3	38	0	M101_11-Nov_1a	0	0	magic
M101	1a	11	11	11-Nov	2016	31/01/2017	13	42	42	86	95	9	39	3	39	0	M101_11-Nov_1a	0	0	magic
M101	1a	11	11	11-Nov	2016	31/01/2017	13	42	42	86	95	9	39	3	40	0	M101_11-Nov_1a	0	0	magic
M101	1a	11	11	11-Nov	2016	31/01/2017	13	42	42	86	95	9	39	3	41	0	M101_11-Nov_1a	0	0	magic
M101	1a	11	11	11-Nov	2016	31/01/2017	13	42	42	86	95	9	39	3	42	0	M101_11-Nov_1a	0	0	magic
M101	1a	11	11	11-Nov	2016	31/01/2017	13	42	42	86	95	9	39	3	43	0	M101_11-Nov_1a	0	0	magic
M101	1a	11	11	11-Nov	2016	31/01/2017	13	42	42	86	95	9	39	3	44	0	M101_11-Nov_1a	0	0	magic
M101	1a	11	11	11-Nov	2016	31/01/2017	13	42	42	86	95	9	39	3	45	0	M101_11-Nov_1a	0	0	magic
M101	1a	11	11	11-Nov	2016	31/01/2017	13	42	42	86	95	9	39	3	46	0	M101_11-Nov_1a	0	0	magic
M101	1a	11	11	11-Nov	2016	31/01/2017	13	42	42	86	95	9	39	3	47	0	M101_11-Nov_1a	0	0	magic
M101	1a	11	11	11-Nov	2016	31/01/2017	13	42	42	86	95	9	39	3	48	0	M101_11-Nov_1a	0	0	magic
M101	1a	11	11	11-Nov	2016	31/01/2017	13	42	42	86	95	9	39	3	49	0	M101_11-Nov_1a	0	0	magic
M101	1a	11	11	11-Nov	2016	31/01/2017	13	42	42	86	95	9	39	3	50	0	M101_11-Nov_1a	0	0	magic
M101	1a	11	11	11-Nov	2016	31/01/2017	13	42	42	86	95	9	39	3	51	0	M101_11-Nov_1a	0	0	magic
M101	1a	11	11	11-Nov	2016	31/01/2017	13	42	42	86	95	9	39	3	52	0	M101_11-Nov_1a	0	0	magic
M101	1a	11	11	11-Nov	2016	31/01/2017	13	42	42	86	95	9	39	3	53	0	M101_11-Nov_1a	0	0	magic
M101	1a	11	11	11-Nov	2016	31/01/2017	13	42	42	86	95	9	39	3	54	0	M101_11-Nov_1a	0	0	magic
M101	1a	11	11	11-Nov	2016	31/01/2017	13	42	42	86	95	9	39	3	55	0	M101_11-Nov_1a	0	0	magic
M101	1a	11	11	11-Nov	2016	31/01/2017	13	42	42	86	95	9	39	3	56	0	M101_11-Nov_1a	0	0	magic
M101	1a	11	11	11-Nov	2016	31/01/2017	13	42	42	86	95	9	39	3	57	0	M101_11-Nov_1a	0	0	magic
M101	1a	11	11	11-Nov	2016	31/01/2017	13	42	42	86	95	9	39	3	58	0	M101_11-Nov_1a	0	0	magic
M101	1a	11	11	11-Nov	2016	31/01/2017	13	42	42	86	95	9	39	3	59	0	M101_11-Nov_1a	0	0	magic
M101	1a	11	11	11-Nov	2016	31/01/2017	13	42	42	86	95	9	39	3	60	0	M101_11-Nov_1a	0	0	magic
M101	1a	11	11	11-Nov	2016	31/01/2017	13	42	42	86	95	9	39	3	61	0	M101_11-Nov_1a	0	0	magic
M101	1a	11	11	11-Nov	2016	31/01/2017	13	42	42	86	95	9	39	3	62	4	M101_11-Nov_1a	4.210526316	4.651162791	magic
M101	1a	11	11	11-Nov	2016	31/01/2017	13	42	42	86	95	9	39	3	63	0	M101_11-Nov_1a	0	0	magic
M101	1a	11	11	11-Nov	2016	31/01/2017	13	42	42	86	95	9	39	3	64	1	M101_11-Nov_1a	1.052631579	1.162790698	magic
M101	1a	11	11	11-Nov	2016	31/01/2017	13	42	42	86	95	9	39	3	65	0	M101_11-Nov_1a	0	0	magic
M101	1a	11	11	11-Nov	2016	31/01/2017	13	42	42	86	95	9	39	3	66	0	M101_11-Nov_1a	0	0	magic
M101	1a	11	11	11-Nov	2016	31/01/2017	13	42	42	86	95	9	39	3	67	0	M101_11-Nov_1a	0	0	magic
M101	1a	11	11	11-Nov	2016	31/01/2017	13	42	42	86	95	9	39	3	68	0	M101_11-Nov_1a	0	0	magic
M101	1a	11	11	11-Nov	2016	31/01/2017	13	42	42	86	95	9	39	3	69	0	M101_11-Nov_1a	0	0	magic
M101	1a	11	11	11-Nov	2016	31/01/2017	13	42	42	86	95	9	39	3	70	0	M101_11-Nov_1a	0	0	magic
M101	1a	11	11	11-Nov	2016	31/01/2017	13	42	42	86	95	9	39	3	71	0	M101_11-Nov_1a	0	0	magic
M101	1a	11	11	11-Nov	2016	31/01/2017	13	42	42	86	95	9	39	3	72	1	M101_11-Nov_1a	1.052631579	1.162790698	magic
M101	1A	17	9	17-Sep	2015		1	31	31	34	128	94	31	2	1	0	M101_17-Sep_1A	0	0	magic
M101	1A	17	9	17-Sep	2015		1	31	31	34	128	94	31	2	2	0	M101_17-Sep_1A	0	0	magic
M101	1A	17	9	17-Sep	2015		1	31	31	34	128	94	31	2	3	7	M101_17-Sep_1A	5.46875	20.58823529	magic
M101	1A	17	9	17-Sep	2015		1	31	31	34	128	94	31	2	4	11	M101_17-Sep_1A	8.59375	32.35294118	magic
M101	1A	17	9	17-Sep	2015		1	31	31	34	128	94	31	2	5	10	M101_17-Sep_1A	7.8125	29.41176471	magic
M101	1A	17	9	17-Sep	2015		1	31	31	34	128	94	31	2	6	1	M101_17-Sep_1A	0.78125	2.941176471	magic
M101	1A	17	9	17-Sep	2015		1	31	31	34	128	94	31	2	7	1	M101_17-Sep_1A	0.78125	2.941176471	magic
M101	1A	17	9	17-Sep	2015		1	31	31	34	128	94	31	2	8	2	M101_17-Sep_1A	1.5625	5.882352941	magic
M101	1A	17	9	17-Sep	2015		1	31	31	34	128	94	31	2	9	0	M101_17-Sep_1A	0	0	magic
M101	1A	17	9	17-Sep	2015		1	31	31	34	128	94	31	2	10	1	M101_17-Sep_1A	0.78125	2.941176471	magic
M101	1A	17	9	17-Sep	2015		1	31	31	34	128	94	31	2	11	0	M101_17-Sep_1A	0	0	magic
M101	1A	17	9	17-Sep	2015		1	31	31	34	128	94	31	2	12	0	M101_17-Sep_1A	0	0	magic
M101	1A	17	9	17-Sep	2015		1	31	31	34	128	94	31	2	13	1	M101_17-Sep_1A	0.78125	2.941176471	magic
M101	1A	19	1	19-Jan	2016		1b	32	32	79	97	18	1	1	1	0	M101_19-Jan_1A	0	0	magic
M101	1A	19	1	19-Jan	2016		1b	32	32	79	97	18	1	1	2	0	M101_19-Jan_1A	0	0	magic
M101	1A	19	1	19-Jan	2016		1b	32	32	79	97	18	1	1	3	30	M101_19-Jan_1A	30.92783505	37.97468354	magic
M101	1A	19	1	19-Jan	2016		1b	32	32	79	97	18	1	1	4	22	M101_19-Jan_1A	22.68041237	27.84810127	magic
M101	1A	19	1	19-Jan	2016		1b	32	32	79	97	18	1	1	5	18	M101_19-Jan_1A	18.55670103	22.78481013	magic
M101	1A	19	1	19-Jan	2016		1b	32	32	79	97	18	1	1	6	6	M101_19-Jan_1A	6.18556701	7.594936709	magic
M101	1A	19	1	19-Jan	2016		1b	32	32	79	97	18	1	1	7	7	M101_19-Jan_1A	7.216494845	8.860759494	magic
M101	1A	19	1	19-Jan	2016		1b	32	32	79	97	18	1	1	8	2	M101_19-Jan_1A	2.06185567	2.53164557	magic
M101	1A	19	1	19-Jan	2016		1b	32	32	79	97	18	1	1	9	1	M101_19-Jan_1A	1.030927835	1.265822785	magic
M101	1A	19	1	19-Jan	2016		1b	32	32	79	97	18	1	1	10	0	M101_19-Jan_1A	0	0	magic
M101	1A	19	1	19-Jan	2016		1b	32	32	79	97	18	1	1	11	0	M101_19-Jan_1A	0	0	magic
M101	1A	19	1	19-Jan	2016		1b	32	32	79	97	18	1	1	12	0	M101_19-Jan_1A	0	0	magic
M101	1A	19	1	19-Jan	2016		1b	32	32	79	97	18	1	1	13	0	M101_19-Jan_1A	0	0	magic
M101	1A	19	1	19-Jan	2016		1b	32	32	79	97	18	1	1	14	0	M101_19-Jan_1A	0	0	magic
M101	1A	19	1	19-Jan	2016		1b	32	32	79	97	18	1	1	15	0	M101_19-Jan_1A	0	0	magic
M101	1A	19	1	19-Jan	2016		1b	32	32	79	97	18	1	1	16	0	M101_19-Jan_1A	0	0	magic
M101	1A	19	1	19-Jan	2016		1b	32	32	79	97	18	1	1	17	0	M101_19-Jan_1A	0	0	magic
M101	1A	19	1	19-Jan	2016		1b	32	32	79	97	18	1	1	18	0	M101_19-Jan_1A	0	0	magic
M101	1A	19	1	19-Jan	2016		1b	32	32	79	97	18	1	1	19	0	M101_19-Jan_1A	0	0	magic
M101	1A	19	1	19-Jan	2016		1b	32	32	79	97	18	1	1	20	0	M101_19-Jan_1A	0	0	magic
M101	1A	19	1	19-Jan	2016		1b	32	32	79	97	18	1	1	21	0	M101_19-Jan_1A	0	0	magic
M101	1A	19	1	19-Jan	2016		1b	32	32	79	97	18	1	1	22	0	M101_19-Jan_1A	0	0	magic
M101	1A	19	1	19-Jan	2016		1b	32	32	79	97	18	1	1	23	0	M101_19-Jan_1A	0	0	magic
M101	1A	19	1	19-Jan	2016		1b	32	32	79	97	18	1	1	24	0	M101_19-Jan_1A	0	0	magic
M101	1A	19	1	19-Jan	2016		1b	32	32	79	97	18	1	1	25	0	M101_19-Jan_1A	0	0	magic
M101	1A	19	1	19-Jan	2016		1b	32	32	79	97	18	1	1	26	0	M101_19-Jan_1A	0	0	magic
M101	1A	19	1	19-Jan	2016		1b	32	32	79	97	18	1	1	27	0	M101_19-Jan_1A	0	0	magic
M101	1A	19	1	19-Jan	2016		1b	32	32	79	97	18	1	1	28	0	M101_19-Jan_1A	0	0	magic
M101	1A	19	1	19-Jan	2016		1b	32	32	79	97	18	1	1	29	0	M101_19-Jan_1A	0	0	magic
M101	1A	19	1	19-Jan	2016		1b	32	32	79	97	18	1	1	30	0	M101_19-Jan_1A	0	0	magic
M101	1A	19	1	19-Jan	2016		1b	32	32	79	97	18	1	1	31	0	M101_19-Jan_1A	0	0	magic
M101	1A	19	1	19-Jan	2016		1b	32	32	79	97	18	1	1	32	0	M101_19-Jan_1A	0	0	magic
M101	1A	19	1	19-Jan	2016		1b	32	32	79	97	18	1	1	33	0	M101_19-Jan_1A	0	0	magic
M101	1A	19	1	19-Jan	2016		1b	32	32	79	97	18	1	1	34	0	M101_19-Jan_1A	0	0	magic
M101	1A	19	1	19-Jan	2016		1b	32	32	79	97	18	1	1	35	0	M101_19-Jan_1A	0	0	magic
M101	1A	19	1	19-Jan	2016		1b	32	32	79	97	18	1	1	36	0	M101_19-Jan_1A	0	0	magic
M101	1A	19	1	19-Jan	2016		1b	32	32	79	97	18	1	1	37	0	M101_19-Jan_1A	0	0	magic
M101	1A	19	1	19-Jan	2016		1b	32	32	79	97	18	1	1	38	0	M101_19-Jan_1A	0	0	magic
M101	1A	19	1	19-Jan	2016		1b	32	32	79	97	18	1	1	39	0	M101_19-Jan_1A	0	0	magic
M101	1A	19	1	19-Jan	2016		1b	32	32	79	97	18	1	1	40	2	M101_19-Jan_1A	2.06185567	2.53164557	magic
M101	1A	19	1	19-Jan	2016		1b	32	32	79	97	18	1	1	41	0	M101_19-Jan_1A	0	0	magic
M101	1A	19	1	19-Jan	2016		1b	32	32	79	97	18	1	1	42	0	M101_19-Jan_1A	0	0	magic
M101	1A	19	1	19-Jan	2016		1b	32	32	79	97	18	1	1	43	0	M101_19-Jan_1A	0	0	magic
M101	1A	19	1	19-Jan	2016		1b	32	32	79	97	18	1	1	44	0	M101_19-Jan_1A	0	0	magic
M101	1A	19	1	19-Jan	2016		1b	32	32	79	97	18	1	1	45	0	M101_19-Jan_1A	0	0	magic
M101	1A	19	1	19-Jan	2016		1b	32	32	79	97	18	1	1	46	0	M101_19-Jan_1A	0	0	magic
M101	1A	19	1	19-Jan	2016		1b	32	32	79	97	18	1	1	47	0	M101_19-Jan_1A	0	0	magic
M101	1A	19	1	19-Jan	2016		1b	32	32	79	97	18	1	1	48	0	M101_19-Jan_1A	0	0	magic
M101	1A	19	1	19-Jan	2016		1b	32	32	79	97	18	1	1	49	0	M101_19-Jan_1A	0	0	magic
M101	1A	19	1	19-Jan	2016		1b	32	32	79	97	18	1	1	50	0	M101_19-Jan_1A	0	0	magic
M101	1A	19	1	19-Jan	2016		1b	32	32	79	97	18	1	1	51	0	M101_19-Jan_1A	0	0	magic
M101	1A	19	1	19-Jan	2016		1b	32	32	79	97	18	1	1	52	1	M101_19-Jan_1A	1.030927835	1.265822785	magic
M101	1A	19	1	19-Jan	2016		1b	32	32	79	97	18	1	1	53	0	M101_19-Jan_1A	0	0	magic
M101	1A	19	1	19-Jan	2016		1b	32	32	79	97	18	1	1	54	0	M101_19-Jan_1A	0	0	magic
M101	1A	19	1	19-Jan	2016		1b	32	32	79	97	18	1	1	55	0	M101_19-Jan_1A	0	0	magic
M101	1A	19	1	19-Jan	2016		1b	32	32	79	97	18	1	1	56	0	M101_19-Jan_1A	0	0	magic
M101	1A	19	1	19-Jan	2016		1b	32	32	79	97	18	1	1	57	0	M101_19-Jan_1A	0	0	magic
M101	1b	25	11	25-Nov	2016	31/01/2017	13	31	31	98	108	10	43	1	1	0	M101_25-Nov_1b	0	0	magic
M101	1b	25	11	25-Nov	2016	31/01/2017	13	31	31	98	108	10	43	1	2	1	M101_25-Nov_1b	0.925925926	1.020408163	magic
M101	1b	25	11	25-Nov	2016	31/01/2017	13	31	31	98	108	10	43	1	3	29	M101_25-Nov_1b	26.85185185	29.59183673	magic
M101	1b	25	11	25-Nov	2016	31/01/2017	13	31	31	98	108	10	43	1	4	25	M101_25-Nov_1b	23.14814815	25.51020408	magic
M101	1b	25	11	25-Nov	2016	31/01/2017	13	31	31	98	108	10	43	1	5	15	M101_25-Nov_1b	13.88888889	15.30612245	magic
M101	1b	25	11	25-Nov	2016	31/01/2017	13	31	31	98	108	10	43	1	6	3	M101_25-Nov_1b	2.777777778	3.06122449	magic
M101	1b	25	11	25-Nov	2016	31/01/2017	13	31	31	98	108	10	43	1	7	4	M101_25-Nov_1b	3.703703704	4.081632653	magic
M101	1b	25	11	25-Nov	2016	31/01/2017	13	31	31	98	108	10	43	1	8	2	M101_25-Nov_1b	1.851851852	2.040816327	magic
M101	1b	25	11	25-Nov	2016	31/01/2017	13	31	31	98	108	10	43	1	9	3	M101_25-Nov_1b	2.777777778	3.06122449	magic
M101	1b	25	11	25-Nov	2016	31/01/2017	13	31	31	98	108	10	43	1	10	2	M101_25-Nov_1b	1.851851852	2.040816327	magic
M101	1b	25	11	25-Nov	2016	31/01/2017	13	31	31	98	108	10	43	1	11	1	M101_25-Nov_1b	0.925925926	1.020408163	magic
M101	1b	25	11	25-Nov	2016	31/01/2017	13	31	31	98	108	10	43	1	12	0	M101_25-Nov_1b	0	0	magic
M101	1b	25	11	25-Nov	2016	31/01/2017	13	31	31	98	108	10	43	1	13	0	M101_25-Nov_1b	0	0	magic
M101	1b	25	11	25-Nov	2016	31/01/2017	13	31	31	98	108	10	43	1	14	0	M101_25-Nov_1b	0	0	magic
M101	1b	25	11	25-Nov	2016	31/01/2017	13	31	31	98	108	10	43	1	15	0	M101_25-Nov_1b	0	0	magic
M101	1b	25	11	25-Nov	2016	31/01/2017	13	31	31	98	108	10	43	1	16	0	M101_25-Nov_1b	0	0	magic
M101	1b	25	11	25-Nov	2016	31/01/2017	13	31	31	98	108	10	43	1	17	0	M101_25-Nov_1b	0	0	magic
M101	1b	25	11	25-Nov	2016	31/01/2017	13	31	31	98	108	10	43	1	18	0	M101_25-Nov_1b	0	0	magic
M101	1b	25	11	25-Nov	2016	31/01/2017	13	31	31	98	108	10	43	1	19	0	M101_25-Nov_1b	0	0	magic
M101	1b	25	11	25-Nov	2016	31/01/2017	13	31	31	98	108	10	43	1	20	0	M101_25-Nov_1b	0	0	magic
M101	1b	25	11	25-Nov	2016	31/01/2017	13	31	31	98	108	10	43	1	21	0	M101_25-Nov_1b	0	0	magic
M101	1b	25	11	25-Nov	2016	31/01/2017	13	31	31	98	108	10	43	1	22	0	M101_25-Nov_1b	0	0	magic
M101	1b	25	11	25-Nov	2016	31/01/2017	13	31	31	98	108	10	43	1	23	0	M101_25-Nov_1b	0	0	magic
M101	1b	25	11	25-Nov	2016	31/01/2017	13	31	31	98	108	10	43	1	24	0	M101_25-Nov_1b	0	0	magic
M101	1b	25	11	25-Nov	2016	31/01/2017	13	31	31	98	108	10	43	1	25	0	M101_25-Nov_1b	0	0	magic
M101	1b	25	11	25-Nov	2016	31/01/2017	13	31	31	98	108	10	43	1	26	0	M101_25-Nov_1b	0	0	magic
M101	1b	25	11	25-Nov	2016	31/01/2017	13	31	31	98	108	10	43	1	27	0	M101_25-Nov_1b	0	0	magic
M101	1b	25	11	25-Nov	2016	31/01/2017	13	31	31	98	108	10	43	1	28	0	M101_25-Nov_1b	0	0	magic
M101	1b	25	11	25-Nov	2016	31/01/2017	13	31	31	98	108	10	43	1	29	0	M101_25-Nov_1b	0	0	magic
M101	1b	25	11	25-Nov	2016	31/01/2017	13	31	31	98	108	10	43	1	30	0	M101_25-Nov_1b	0	0	magic
M101	1b	25	11	25-Nov	2016	31/01/2017	13	31	31	98	108	10	43	1	31	0	M101_25-Nov_1b	0	0	magic
M101	1b	25	11	25-Nov	2016	31/01/2017	13	31	31	98	108	10	43	1	32	0	M101_25-Nov_1b	0	0	magic
M101	1b	25	11	25-Nov	2016	31/01/2017	13	31	31	98	108	10	43	1	33	0	M101_25-Nov_1b	0	0	magic
M101	1b	25	11	25-Nov	2016	31/01/2017	13	31	31	98	108	10	43	1	34	0	M101_25-Nov_1b	0	0	magic
M101	1b	25	11	25-Nov	2016	31/01/2017	13	31	31	98	108	10	43	1	35	0	M101_25-Nov_1b	0	0	magic
M101	1b	25	11	25-Nov	2016	31/01/2017	13	31	31	98	108	10	43	1	36	0	M101_25-Nov_1b	0	0	magic
M101	1b	25	11	25-Nov	2016	31/01/2017	13	31	31	98	108	10	43	1	37	0	M101_25-Nov_1b	0	0	magic
M101	1b	25	11	25-Nov	2016	31/01/2017	13	31	31	98	108	10	43	1	38	0	M101_25-Nov_1b	0	0	magic
M101	1b	25	11	25-Nov	2016	31/01/2017	13	31	31	98	108	10	43	1	39	0	M101_25-Nov_1b	0	0	magic
M101	1b	25	11	25-Nov	2016	31/01/2017	13	31	31	98	108	10	43	1	40	0	M101_25-Nov_1b	0	0	magic
M101	1b	25	11	25-Nov	2016	31/01/2017	13	31	31	98	108	10	43	1	41	0	M101_25-Nov_1b	0	0	magic
M101	1b	25	11	25-Nov	2016	31/01/2017	13	31	31	98	108	10	43	1	42	0	M101_25-Nov_1b	0	0	magic
M101	1b	25	11	25-Nov	2016	31/01/2017	13	31	31	98	108	10	43	1	43	0	M101_25-Nov_1b	0	0	magic
M101	1b	25	11	25-Nov	2016	31/01/2017	13	31	31	98	108	10	43	1	44	0	M101_25-Nov_1b	0	0	magic
M101	1b	25	11	25-Nov	2016	31/01/2017	13	31	31	98	108	10	43	1	45	0	M101_25-Nov_1b	0	0	magic
M101	1b	25	11	25-Nov	2016	31/01/2017	13	31	31	98	108	10	43	1	46	0	M101_25-Nov_1b	0	0	magic
M101	1b	25	11	25-Nov	2016	31/01/2017	13	31	31	98	108	10	43	1	47	0	M101_25-Nov_1b	0	0	magic
M101	1b	25	11	25-Nov	2016	31/01/2017	13	31	31	98	108	10	43	1	48	1	M101_25-Nov_1b	0.925925926	1.020408163	magic
M101	1b	25	11	25-Nov	2016	31/01/2017	13	31	31	98	108	10	43	1	49	2	M101_25-Nov_1b	1.851851852	2.040816327	magic
M101	1b	25	11	25-Nov	2016	31/01/2017	13	31	31	98	108	10	43	1	50	0	M101_25-Nov_1b	0	0	magic
M101	1b	25	11	25-Nov	2016	31/01/2017	13	31	31	98	108	10	43	1	51	0	M101_25-Nov_1b	0	0	magic
M101	1b	25	11	25-Nov	2016	31/01/2017	13	31	31	98	108	10	43	1	52	2	M101_25-Nov_1b	1.851851852	2.040816327	magic
M101	1b	25	11	25-Nov	2016	31/01/2017	13	31	31	98	108	10	43	1	53	0	M101_25-Nov_1b	0	0	magic
M101	1b	25	11	25-Nov	2016	31/01/2017	13	31	31	98	108	10	43	1	54	1	M101_25-Nov_1b	0.925925926	1.020408163	magic
M101	1b	25	11	25-Nov	2016	31/01/2017	13	31	31	98	108	10	43	1	55	0	M101_25-Nov_1b	0	0	magic
M101	1b	25	11	25-Nov	2016	31/01/2017	13	31	31	98	108	10	43	1	56	2	M101_25-Nov_1b	1.851851852	2.040816327	magic
M101	1b	25	11	25-Nov	2016	31/01/2017	13	31	31	98	108	10	43	1	57	1	M101_25-Nov_1b	0.925925926	1.020408163	magic
M101	1b	25	11	25-Nov	2016	31/01/2017	13	31	31	98	108	10	43	1	58	0	M101_25-Nov_1b	0	0	magic
M101	1b	25	11	25-Nov	2016	31/01/2017	13	31	31	98	108	10	43	1	59	0	M101_25-Nov_1b	0	0	magic
M101	1b	25	11	25-Nov	2016	31/01/2017	13	31	31	98	108	10	43	1	60	2	M101_25-Nov_1b	1.851851852	2.040816327	magic
M101	1b	25	11	25-Nov	2016	31/01/2017	13	31	31	98	108	10	43	1	61	1	M101_25-Nov_1b	0.925925926	1.020408163	magic
M101	1b	25	11	25-Nov	2016	31/01/2017	13	31	31	98	108	10	43	1	62	0	M101_25-Nov_1b	0	0	magic
M101	1b	25	11	25-Nov	2016	31/01/2017	13	31	31	98	108	10	43	1	63	0	M101_25-Nov_1b	0	0	magic
M101	1b	25	11	25-Nov	2016	31/01/2017	13	31	31	98	108	10	43	1	64	0	M101_25-Nov_1b	0	0	magic
M101	1b	25	11	25-Nov	2016	31/01/2017	13	31	31	98	108	10	43	1	65	0	M101_25-Nov_1b	0	0	magic
M101	1b	25	11	25-Nov	2016	31/01/2017	13	31	31	98	108	10	43	1	66	0	M101_25-Nov_1b	0	0	magic
M101	1b	25	11	25-Nov	2016	31/01/2017	13	31	31	98	108	10	43	1	67	1	M101_25-Nov_1b	0.925925926	1.020408163	magic
M101	1b	25	11	25-Nov	2016	31/01/2017	13	31	31	98	108	10	43	1	68	0	M101_25-Nov_1b	0	0	magic
M101	1b	25	11	25-Nov	2016	31/01/2017	13	31	31	98	108	10	43	1	69	0	M101_25-Nov_1b	0	0	magic
M101	1b	25	11	25-Nov	2016	31/01/2017	13	31	31	98	108	10	43	1	70	0	M101_25-Nov_1b	0	0	magic
M101	1b	25	11	25-Nov	2016	31/01/2017	13	31	31	98	108	10	43	1	71	0	M101_25-Nov_1b	0	0	magic
M101	1b	25	11	25-Nov	2016	31/01/2017	13	31	31	98	108	10	43	1	72	0	M101_25-Nov_1b	0	0	magic
M101	1B	19	1	19-Jan	2016		1b	32	32	49	99	50	2	2	1	0	M101_19-Jan_1B	0	0	magic
M101	1B	19	1	19-Jan	2016		1b	32	32	49	99	50	2	2	2	0	M101_19-Jan_1B	0	0	magic
M101	1B	19	1	19-Jan	2016		1b	32	32	49	99	50	2	2	3	12	M101_19-Jan_1B	12.12121212	24.48979592	magic
M101	1B	19	1	19-Jan	2016		1b	32	32	49	99	50	2	2	4	21	M101_19-Jan_1B	21.21212121	42.85714286	magic
M101	1B	19	1	19-Jan	2016		1b	32	32	49	99	50	2	2	5	8	M101_19-Jan_1B	8.080808081	16.32653061	magic
M101	1B	19	1	19-Jan	2016		1b	32	32	49	99	50	2	2	6	3	M101_19-Jan_1B	3.03030303	6.12244898	magic
M101	1B	19	1	19-Jan	2016		1b	32	32	49	99	50	2	2	7	4	M101_19-Jan_1B	4.04040404	8.163265306	magic
M101	1B	19	1	19-Jan	2016		1b	32	32	49	99	50	2	2	8	4	M101_19-Jan_1B	4.04040404	8.163265306	magic
M101	1B	19	1	19-Jan	2016		1b	32	32	49	99	50	2	2	9	2	M101_19-Jan_1B	2.02020202	4.081632653	magic
M101	1B	19	1	19-Jan	2016		1b	32	32	49	99	50	2	2	10	0	M101_19-Jan_1B	0	0	magic
M101	1B	19	1	19-Jan	2016		1b	32	32	49	99	50	2	2	11	0	M101_19-Jan_1B	0	0	magic
M101	1B	19	1	19-Jan	2016		1b	32	32	49	99	50	2	2	12	0	M101_19-Jan_1B	0	0	magic
M101	1B	19	1	19-Jan	2016		1b	32	32	49	99	50	2	2	13	1	M101_19-Jan_1B	1.01010101	2.040816327	magic
M101	1B	19	1	19-Jan	2016		1b	32	32	49	99	50	2	2	14	1	M101_19-Jan_1B	1.01010101	2.040816327	magic
M101	1B	19	1	19-Jan	2016		1b	32	32	49	99	50	2	2	15	1	M101_19-Jan_1B	1.01010101	2.040816327	magic
M101	1B	19	1	19-Jan	2016		1b	32	32	49	99	50	2	2	16	0	M101_19-Jan_1B	0	0	magic
M101	1B	19	1	19-Jan	2016		1b	32	32	49	99	50	2	2	17	0	M101_19-Jan_1B	0	0	magic
M101	1B	19	1	19-Jan	2016		1b	32	32	49	99	50	2	2	18	0	M101_19-Jan_1B	0	0	magic
M101	1B	19	1	19-Jan	2016		1b	32	32	49	99	50	2	2	19	0	M101_19-Jan_1B	0	0	magic
M101	1B	19	1	19-Jan	2016		1b	32	32	49	99	50	2	2	20	0	M101_19-Jan_1B	0	0	magic
M101	1B	19	1	19-Jan	2016		1b	32	32	49	99	50	2	2	21	0	M101_19-Jan_1B	0	0	magic
M101	1B	19	1	19-Jan	2016		1b	32	32	49	99	50	2	2	22	0	M101_19-Jan_1B	0	0	magic
M101	1B	19	1	19-Jan	2016		1b	32	32	49	99	50	2	2	23	0	M101_19-Jan_1B	0	0	magic
M101	1B	19	1	19-Jan	2016		1b	32	32	49	99	50	2	2	24	0	M101_19-Jan_1B	0	0	magic
M101	1B	19	1	19-Jan	2016		1b	32	32	49	99	50	2	2	25	0	M101_19-Jan_1B	0	0	magic
M101	1B	19	1	19-Jan	2016		1b	32	32	49	99	50	2	2	26	0	M101_19-Jan_1B	0	0	magic
M101	1B	19	1	19-Jan	2016		1b	32	32	49	99	50	2	2	27	0	M101_19-Jan_1B	0	0	magic
M101	1B	19	1	19-Jan	2016		1b	32	32	49	99	50	2	2	28	0	M101_19-Jan_1B	0	0	magic
M101	1B	19	1	19-Jan	2016		1b	32	32	49	99	50	2	2	29	0	M101_19-Jan_1B	0	0	magic
M101	1B	19	1	19-Jan	2016		1b	32	32	49	99	50	2	2	30	0	M101_19-Jan_1B	0	0	magic
M101	1B	19	1	19-Jan	2016		1b	32	32	49	99	50	2	2	31	0	M101_19-Jan_1B	0	0	magic
M101	1B	19	1	19-Jan	2016		1b	32	32	49	99	50	2	2	32	0	M101_19-Jan_1B	0	0	magic
M101	1B	19	1	19-Jan	2016		1b	32	32	49	99	50	2	2	33	0	M101_19-Jan_1B	0	0	magic
M101	1B	19	1	19-Jan	2016		1b	32	32	49	99	50	2	2	34	0	M101_19-Jan_1B	0	0	magic
M101	1B	19	1	19-Jan	2016		1b	32	32	49	99	50	2	2	35	0	M101_19-Jan_1B	0	0	magic
M101	1B	19	1	19-Jan	2016		1b	32	32	49	99	50	2	2	36	0	M101_19-Jan_1B	0	0	magic
M101	1B	19	1	19-Jan	2016		1b	32	32	49	99	50	2	2	37	0	M101_19-Jan_1B	0	0	magic
M101	1B	19	1	19-Jan	2016		1b	32	32	49	99	50	2	2	38	0	M101_19-Jan_1B	0	0	magic
M101	1B	19	1	19-Jan	2016		1b	32	32	49	99	50	2	2	39	0	M101_19-Jan_1B	0	0	magic
M101	1B	19	1	19-Jan	2016		1b	32	32	49	99	50	2	2	40	0	M101_19-Jan_1B	0	0	magic
M101	1B	19	1	19-Jan	2016		1b	32	32	49	99	50	2	2	41	0	M101_19-Jan_1B	0	0	magic
M101	1B	19	1	19-Jan	2016		1b	32	32	49	99	50	2	2	42	0	M101_19-Jan_1B	0	0	magic
M101	1B	19	1	19-Jan	2016		1b	32	32	49	99	50	2	2	43	0	M101_19-Jan_1B	0	0	magic
M101	1B	19	1	19-Jan	2016		1b	32	32	49	99	50	2	2	44	0	M101_19-Jan_1B	0	0	magic
M101	1B	19	1	19-Jan	2016		1b	32	32	49	99	50	2	2	45	1	M101_19-Jan_1B	1.01010101	2.040816327	magic
M101	1B	19	1	19-Jan	2016		1b	32	32	49	99	50	2	2	46	1	M101_19-Jan_1B	1.01010101	2.040816327	magic
M101	1B	19	1	19-Jan	2016		1b	32	32	49	99	50	2	2	47	1	M101_19-Jan_1B	1.01010101	2.040816327	magic
M101	1B	19	1	19-Jan	2016		1b	32	32	49	99	50	2	2	48	0	M101_19-Jan_1B	0	0	magic
M101	1B	19	1	19-Jan	2016		1b	32	32	49	99	50	2	2	49	0	M101_19-Jan_1B	0	0	magic
M101	1B	19	1	19-Jan	2016		1b	32	32	49	99	50	2	2	50	0	M101_19-Jan_1B	0	0	magic
M101	1B	19	1	19-Jan	2016		1b	32	32	49	99	50	2	2	51	1	M101_19-Jan_1B	1.01010101	2.040816327	magic
M101	1B	19	1	19-Jan	2016		1b	32	32	49	99	50	2	2	52	0	M101_19-Jan_1B	0	0	magic
M101	1B	19	1	19-Jan	2016		1b	32	32	49	99	50	2	2	53	0	M101_19-Jan_1B	0	0	magic
M101	1B	19	1	19-Jan	2016		1b	32	32	49	99	50	2	2	54	0	M101_19-Jan_1B	0	0	magic
M101	1B	19	1	19-Jan	2016		1b	32	32	49	99	50	2	2	55	1	M101_19-Jan_1B	1.01010101	2.040816327	magic
M101	1B	19	1	19-Jan	2016		1b	32	32	49	99	50	2	2	56	0	M101_19-Jan_1B	0	0	magic
M101	1B	19	1	19-Jan	2016		1b	32	32	49	99	50	2	2	57	1	M101_19-Jan_1B	1.01010101	2.040816327	magic
M101	2	7	3	7-Mar	2016		3	33	33	92	148	56	9	1	1	0	M101_07-Mar_2	0	0	magic
M101	2	7	3	7-Mar	2016		3	33	33	92	148	56	9	1	2	0	M101_07-Mar_2	0	0	magic
M101	2	7	3	7-Mar	2016		3	33	33	92	148	56	9	1	3	1	M101_07-Mar_2	0.675675676	1.086956522	magic
M101	2	7	3	7-Mar	2016		3	33	33	92	148	56	9	1	4	4	M101_07-Mar_2	2.702702703	4.347826087	magic
M101	2	7	3	7-Mar	2016		3	33	33	92	148	56	9	1	5	13	M101_07-Mar_2	8.783783784	14.13043478	magic
M101	2	7	3	7-Mar	2016		3	33	33	92	148	56	9	1	6	19	M101_07-Mar_2	12.83783784	20.65217391	magic
M101	2	7	3	7-Mar	2016		3	33	33	92	148	56	9	1	7	21	M101_07-Mar_2	14.18918919	22.82608696	magic
M101	2	7	3	7-Mar	2016		3	33	33	92	148	56	9	1	8	7	M101_07-Mar_2	4.72972973	7.608695652	magic
M101	2	7	3	7-Mar	2016		3	33	33	92	148	56	9	1	9	9	M101_07-Mar_2	6.081081081	9.782608696	magic
M101	2	7	3	7-Mar	2016		3	33	33	92	148	56	9	1	10	0	M101_07-Mar_2	0	0	magic
M101	2	7	3	7-Mar	2016		3	33	33	92	148	56	9	1	11	9	M101_07-Mar_2	6.081081081	9.782608696	magic
M101	2	7	3	7-Mar	2016		3	33	33	92	148	56	9	1	12	9	M101_07-Mar_2	6.081081081	9.782608696	magic
M101	2	7	3	7-Mar	2016		3	33	33	92	148	56	9	1	13	0	M101_07-Mar_2	0	0	magic
M101	2	7	3	7-Mar	2016		3	33	33	92	148	56	9	1	14	0	M101_07-Mar_2	0	0	magic
M101	2	7	3	7-Mar	2016		3	33	33	92	148	56	9	1	15	0	M101_07-Mar_2	0	0	magic
M101	2	11	11	11-Nov	2016	4/1/2017	13	42	42	108	109	1	37	1	1	0	M101_11-Nov_2	0	0	magic
M101	2	11	11	11-Nov	2016	4/1/2017	13	42	42	108	109	1	37	1	2	5	M101_11-Nov_2	4.587155963	4.62962963	magic
M101	2	11	11	11-Nov	2016	4/1/2017	13	42	42	108	109	1	37	1	3	51	M101_11-Nov_2	46.78899083	47.22222222	magic
M101	2	11	11	11-Nov	2016	4/1/2017	13	42	42	108	109	1	37	1	4	35	M101_11-Nov_2	32.11009174	32.40740741	magic
M101	2	11	11	11-Nov	2016	4/1/2017	13	42	42	108	109	1	37	1	5	17	M101_11-Nov_2	15.59633028	15.74074074	magic
M101	2	11	11	11-Nov	2016	4/1/2017	13	42	42	108	109	1	37	1	6	0	M101_11-Nov_2	0	0	magic
M101	2	11	11	11-Nov	2016	4/1/2017	13	42	42	108	109	1	37	1	7	0	M101_11-Nov_2	0	0	magic
M101	2	11	11	11-Nov	2016	4/1/2017	13	42	42	108	109	1	37	1	8	0	M101_11-Nov_2	0	0	magic
M101	2	11	11	11-Nov	2016	4/1/2017	13	42	42	108	109	1	37	1	9	0	M101_11-Nov_2	0	0	magic
M101	2	11	11	11-Nov	2016	4/1/2017	13	42	42	108	109	1	37	1	10	0	M101_11-Nov_2	0	0	magic
M101	2	11	11	11-Nov	2016	4/1/2017	13	42	42	108	109	1	37	1	11	0	M101_11-Nov_2	0	0	magic
M101	2	11	11	11-Nov	2016	4/1/2017	13	42	42	108	109	1	37	1	12	0	M101_11-Nov_2	0	0	magic
M101	2	11	11	11-Nov	2016	4/1/2017	13	42	42	108	109	1	37	1	13	0	M101_11-Nov_2	0	0	magic
M101	2	11	11	11-Nov	2016	4/1/2017	13	42	42	108	109	1	37	1	14	0	M101_11-Nov_2	0	0	magic
M101	2	11	11	11-Nov	2016	4/1/2017	13	42	42	108	109	1	37	1	15	0	M101_11-Nov_2	0	0	magic
M101	2	11	11	11-Nov	2016	4/1/2017	13	42	42	108	109	1	37	1	16	0	M101_11-Nov_2	0	0	magic
M101	2	11	11	11-Nov	2016	4/1/2017	13	42	42	108	109	1	37	1	17	0	M101_11-Nov_2	0	0	magic
M101	2	11	11	11-Nov	2016	4/1/2017	13	42	42	108	109	1	37	1	18	0	M101_11-Nov_2	0	0	magic
M101	2	11	11	11-Nov	2016	4/1/2017	13	42	42	108	109	1	37	1	19	0	M101_11-Nov_2	0	0	magic
M101	2	11	11	11-Nov	2016	4/1/2017	13	42	42	108	109	1	37	1	20	0	M101_11-Nov_2	0	0	magic
M101	2	11	11	11-Nov	2016	4/1/2017	13	42	42	108	109	1	37	1	21	0	M101_11-Nov_2	0	0	magic
M101	2	11	11	11-Nov	2016	4/1/2017	13	42	42	108	109	1	37	1	22	0	M101_11-Nov_2	0	0	magic
M101	2	11	11	11-Nov	2016	4/1/2017	13	42	42	108	109	1	37	1	23	0	M101_11-Nov_2	0	0	magic
M101	2	11	11	11-Nov	2016	4/1/2017	13	42	42	108	109	1	37	1	24	0	M101_11-Nov_2	0	0	magic
M101	2	11	11	11-Nov	2016	4/1/2017	13	42	42	108	109	1	37	1	25	0	M101_11-Nov_2	0	0	magic
M101	2	11	11	11-Nov	2016	4/1/2017	13	42	42	108	109	1	37	1	26	0	M101_11-Nov_2	0	0	magic
M101	2	11	11	11-Nov	2016	4/1/2017	13	42	42	108	109	1	37	1	27	0	M101_11-Nov_2	0	0	magic
M101	2	11	11	11-Nov	2016	4/1/2017	13	42	42	108	109	1	37	1	28	0	M101_11-Nov_2	0	0	magic
M101	2	11	11	11-Nov	2016	4/1/2017	13	42	42	108	109	1	37	1	29	0	M101_11-Nov_2	0	0	magic
M101	2	11	11	11-Nov	2016	4/1/2017	13	42	42	108	109	1	37	1	30	0	M101_11-Nov_2	0	0	magic
M101	2	11	11	11-Nov	2016	4/1/2017	13	42	42	108	109	1	37	1	31	0	M101_11-Nov_2	0	0	magic
M101	2	11	11	11-Nov	2016	4/1/2017	13	42	42	108	109	1	37	1	32	0	M101_11-Nov_2	0	0	magic
M101	2	11	11	11-Nov	2016	4/1/2017	13	42	42	108	109	1	37	1	33	0	M101_11-Nov_2	0	0	magic
M101	2	11	11	11-Nov	2016	4/1/2017	13	42	42	108	109	1	37	1	34	0	M101_11-Nov_2	0	0	magic
M101	2	11	11	11-Nov	2016	4/1/2017	13	42	42	108	109	1	37	1	35	0	M101_11-Nov_2	0	0	magic
M101	2	11	11	11-Nov	2016	4/1/2017	13	42	42	108	109	1	37	1	36	0	M101_11-Nov_2	0	0	magic
M101	2	11	11	11-Nov	2016	4/1/2017	13	42	42	108	109	1	37	1	37	0	M101_11-Nov_2	0	0	magic
M101	2	11	11	11-Nov	2016	4/1/2017	13	42	42	108	109	1	37	1	38	0	M101_11-Nov_2	0	0	magic
M101	2	11	11	11-Nov	2016	4/1/2017	13	42	42	108	109	1	37	1	39	0	M101_11-Nov_2	0	0	magic
M101	2	11	11	11-Nov	2016	4/1/2017	13	42	42	108	109	1	37	1	40	0	M101_11-Nov_2	0	0	magic
M101	2	11	11	11-Nov	2016	4/1/2017	13	42	42	108	109	1	37	1	41	0	M101_11-Nov_2	0	0	magic
M101	2	11	11	11-Nov	2016	4/1/2017	13	42	42	108	109	1	37	1	42	0	M101_11-Nov_2	0	0	magic
M101	2	11	11	11-Nov	2016	4/1/2017	13	42	42	108	109	1	37	1	43	0	M101_11-Nov_2	0	0	magic
M101	2	11	11	11-Nov	2016	4/1/2017	13	42	42	108	109	1	37	1	44	0	M101_11-Nov_2	0	0	magic
M101	2	11	11	11-Nov	2016	4/1/2017	13	42	42	108	109	1	37	1	45	0	M101_11-Nov_2	0	0	magic
M101	2	11	11	11-Nov	2016	4/1/2017	13	42	42	108	109	1	37	1	46	0	M101_11-Nov_2	0	0	magic
M101	2	11	11	11-Nov	2016	4/1/2017	13	42	42	108	109	1	37	1	47	0	M101_11-Nov_2	0	0	magic
M101	2	11	11	11-Nov	2016	4/1/2017	13	42	42	108	109	1	37	1	48	0	M101_11-Nov_2	0	0	magic
M101	2	11	11	11-Nov	2016	4/1/2017	13	42	42	108	109	1	37	1	49	0	M101_11-Nov_2	0	0	magic
M101	2	11	11	11-Nov	2016	4/1/2017	13	42	42	108	109	1	37	1	50	0	M101_11-Nov_2	0	0	magic
M101	2	11	11	11-Nov	2016	4/1/2017	13	42	42	108	109	1	37	1	51	0	M101_11-Nov_2	0	0	magic
M101	2	11	11	11-Nov	2016	4/1/2017	13	42	42	108	109	1	37	1	52	0	M101_11-Nov_2	0	0	magic
M101	2	11	11	11-Nov	2016	4/1/2017	13	42	42	108	109	1	37	1	53	0	M101_11-Nov_2	0	0	magic
M101	2	11	11	11-Nov	2016	4/1/2017	13	42	42	108	109	1	37	1	54	0	M101_11-Nov_2	0	0	magic
M101	2	11	11	11-Nov	2016	4/1/2017	13	42	42	108	109	1	37	1	55	0	M101_11-Nov_2	0	0	magic
M101	2	11	11	11-Nov	2016	4/1/2017	13	42	42	108	109	1	37	1	56	0	M101_11-Nov_2	0	0	magic
M101	2	11	11	11-Nov	2016	4/1/2017	13	42	42	108	109	1	37	1	57	0	M101_11-Nov_2	0	0	magic
M101	2	11	11	11-Nov	2016	4/1/2017	13	42	42	108	109	1	37	1	58	0	M101_11-Nov_2	0	0	magic
M101	2	11	11	11-Nov	2016	4/1/2017	13	42	42	108	109	1	37	1	59	0	M101_11-Nov_2	0	0	magic
M101	2	11	11	11-Nov	2016	4/1/2017	13	42	42	108	109	1	37	1	60	0	M101_11-Nov_2	0	0	magic
M101	2	11	11	11-Nov	2016	4/1/2017	13	42	42	108	109	1	37	1	61	0	M101_11-Nov_2	0	0	magic
M101	2	11	11	11-Nov	2016	4/1/2017	13	42	42	108	109	1	37	1	62	0	M101_11-Nov_2	0	0	magic
M101	2	11	11	11-Nov	2016	4/1/2017	13	42	42	108	109	1	37	1	63	0	M101_11-Nov_2	0	0	magic
M101	2	11	11	11-Nov	2016	4/1/2017	13	42	42	108	109	1	37	1	64	0	M101_11-Nov_2	0	0	magic
M101	2	11	11	11-Nov	2016	4/1/2017	13	42	42	108	109	1	37	1	65	0	M101_11-Nov_2	0	0	magic
M101	2	11	11	11-Nov	2016	4/1/2017	13	42	42	108	109	1	37	1	66	0	M101_11-Nov_2	0	0	magic
M101	2	11	11	11-Nov	2016	4/1/2017	13	42	42	108	109	1	37	1	67	0	M101_11-Nov_2	0	0	magic
M101	2	11	11	11-Nov	2016	4/1/2017	13	42	42	108	109	1	37	1	68	0	M101_11-Nov_2	0	0	magic
M101	2	11	11	11-Nov	2016	4/1/2017	13	42	42	108	109	1	37	1	69	0	M101_11-Nov_2	0	0	magic
M101	2	11	11	11-Nov	2016	4/1/2017	13	42	42	108	109	1	37	1	70	0	M101_11-Nov_2	0	0	magic
M101	2	11	11	11-Nov	2016	4/1/2017	13	42	42	108	109	1	37	1	71	0	M101_11-Nov_2	0	0	magic
M101	2	11	11	11-Nov	2016	4/1/2017	13	42	42	108	109	1	37	1	72	0	M101_11-Nov_2	0	0	magic
M101	2A	19	1	19-Jan	2016		1b	32	32	39	107	68	4	4	1	0	M101_19-Jan_2A	0	0	magic
M101	2A	19	1	19-Jan	2016		1b	32	32	39	107	68	4	4	2	0	M101_19-Jan_2A	0	0	magic
M101	2A	19	1	19-Jan	2016		1b	32	32	39	107	68	4	4	3	15	M101_19-Jan_2A	14.01869159	38.46153846	magic
M101	2A	19	1	19-Jan	2016		1b	32	32	39	107	68	4	4	4	15	M101_19-Jan_2A	14.01869159	38.46153846	magic
M101	2A	19	1	19-Jan	2016		1b	32	32	39	107	68	4	4	5	3	M101_19-Jan_2A	2.803738318	7.692307692	magic
M101	2A	19	1	19-Jan	2016		1b	32	32	39	107	68	4	4	6	6	M101_19-Jan_2A	5.607476636	15.38461538	magic
M101	2A	19	1	19-Jan	2016		1b	32	32	39	107	68	4	4	7	3	M101_19-Jan_2A	2.803738318	7.692307692	magic
M101	2A	19	1	19-Jan	2016		1b	32	32	39	107	68	4	4	8	0	M101_19-Jan_2A	0	0	magic
M101	2A	19	1	19-Jan	2016		1b	32	32	39	107	68	4	4	9	1	M101_19-Jan_2A	0.934579439	2.564102564	magic
M101	2A	19	1	19-Jan	2016		1b	32	32	39	107	68	4	4	10	2	M101_19-Jan_2A	1.869158879	5.128205128	magic
M101	2A	19	1	19-Jan	2016		1b	32	32	39	107	68	4	4	11	0	M101_19-Jan_2A	0	0	magic
M101	2A	19	1	19-Jan	2016		1b	32	32	39	107	68	4	4	12	0	M101_19-Jan_2A	0	0	magic
M101	2A	19	1	19-Jan	2016		1b	32	32	39	107	68	4	4	13	0	M101_19-Jan_2A	0	0	magic
M101	2A	19	1	19-Jan	2016		1b	32	32	39	107	68	4	4	14	0	M101_19-Jan_2A	0	0	magic
M101	2A	19	1	19-Jan	2016		1b	32	32	39	107	68	4	4	15	0	M101_19-Jan_2A	0	0	magic
M101	2A	19	1	19-Jan	2016		1b	32	32	39	107	68	4	4	16	0	M101_19-Jan_2A	0	0	magic
M101	2A	19	1	19-Jan	2016		1b	32	32	39	107	68	4	4	17	0	M101_19-Jan_2A	0	0	magic
M101	2A	19	1	19-Jan	2016		1b	32	32	39	107	68	4	4	18	0	M101_19-Jan_2A	0	0	magic
M101	2A	19	1	19-Jan	2016		1b	32	32	39	107	68	4	4	19	0	M101_19-Jan_2A	0	0	magic
M101	2A	19	1	19-Jan	2016		1b	32	32	39	107	68	4	4	20	0	M101_19-Jan_2A	0	0	magic
M101	2A	19	1	19-Jan	2016		1b	32	32	39	107	68	4	4	21	0	M101_19-Jan_2A	0	0	magic
M101	2A	19	1	19-Jan	2016		1b	32	32	39	107	68	4	4	22	0	M101_19-Jan_2A	0	0	magic
M101	2A	19	1	19-Jan	2016		1b	32	32	39	107	68	4	4	23	0	M101_19-Jan_2A	0	0	magic
M101	2A	19	1	19-Jan	2016		1b	32	32	39	107	68	4	4	24	0	M101_19-Jan_2A	0	0	magic
M101	2A	19	1	19-Jan	2016		1b	32	32	39	107	68	4	4	25	0	M101_19-Jan_2A	0	0	magic
M101	2A	19	1	19-Jan	2016		1b	32	32	39	107	68	4	4	26	0	M101_19-Jan_2A	0	0	magic
M101	2A	19	1	19-Jan	2016		1b	32	32	39	107	68	4	4	27	0	M101_19-Jan_2A	0	0	magic
M101	2A	19	1	19-Jan	2016		1b	32	32	39	107	68	4	4	28	0	M101_19-Jan_2A	0	0	magic
M101	2A	19	1	19-Jan	2016		1b	32	32	39	107	68	4	4	29	0	M101_19-Jan_2A	0	0	magic
M101	2A	19	1	19-Jan	2016		1b	32	32	39	107	68	4	4	30	0	M101_19-Jan_2A	0	0	magic
M101	2A	19	1	19-Jan	2016		1b	32	32	39	107	68	4	4	31	0	M101_19-Jan_2A	0	0	magic
M101	2A	19	1	19-Jan	2016		1b	32	32	39	107	68	4	4	32	0	M101_19-Jan_2A	0	0	magic
M101	2A	19	1	19-Jan	2016		1b	32	32	39	107	68	4	4	33	0	M101_19-Jan_2A	0	0	magic
M101	2A	19	1	19-Jan	2016		1b	32	32	39	107	68	4	4	34	0	M101_19-Jan_2A	0	0	magic
M101	2A	19	1	19-Jan	2016		1b	32	32	39	107	68	4	4	35	0	M101_19-Jan_2A	0	0	magic
M101	2A	19	1	19-Jan	2016		1b	32	32	39	107	68	4	4	36	0	M101_19-Jan_2A	0	0	magic
M101	2A	19	1	19-Jan	2016		1b	32	32	39	107	68	4	4	37	0	M101_19-Jan_2A	0	0	magic
M101	2A	19	1	19-Jan	2016		1b	32	32	39	107	68	4	4	38	0	M101_19-Jan_2A	0	0	magic
M101	2A	19	1	19-Jan	2016		1b	32	32	39	107	68	4	4	39	0	M101_19-Jan_2A	0	0	magic
M101	2A	19	1	19-Jan	2016		1b	32	32	39	107	68	4	4	40	0	M101_19-Jan_2A	0	0	magic
M101	2A	19	1	19-Jan	2016		1b	32	32	39	107	68	4	4	41	0	M101_19-Jan_2A	0	0	magic
M101	2A	19	1	19-Jan	2016		1b	32	32	39	107	68	4	4	42	0	M101_19-Jan_2A	0	0	magic
M101	2A	19	1	19-Jan	2016		1b	32	32	39	107	68	4	4	43	0	M101_19-Jan_2A	0	0	magic
M101	2A	19	1	19-Jan	2016		1b	32	32	39	107	68	4	4	44	0	M101_19-Jan_2A	0	0	magic
M101	2A	19	1	19-Jan	2016		1b	32	32	39	107	68	4	4	45	0	M101_19-Jan_2A	0	0	magic
M101	2A	19	1	19-Jan	2016		1b	32	32	39	107	68	4	4	46	0	M101_19-Jan_2A	0	0	magic
M101	2A	19	1	19-Jan	2016		1b	32	32	39	107	68	4	4	47	0	M101_19-Jan_2A	0	0	magic
M101	2A	19	1	19-Jan	2016		1b	32	32	39	107	68	4	4	48	0	M101_19-Jan_2A	0	0	magic
M101	2A	19	1	19-Jan	2016		1b	32	32	39	107	68	4	4	49	0	M101_19-Jan_2A	0	0	magic
M101	2A	19	1	19-Jan	2016		1b	32	32	39	107	68	4	4	50	0	M101_19-Jan_2A	0	0	magic
M101	2A	19	1	19-Jan	2016		1b	32	32	39	107	68	4	4	51	0	M101_19-Jan_2A	0	0	magic
M101	2A	19	1	19-Jan	2016		1b	32	32	39	107	68	4	4	52	0	M101_19-Jan_2A	0	0	magic
M101	2A	19	1	19-Jan	2016		1b	32	32	39	107	68	4	4	53	0	M101_19-Jan_2A	0	0	magic
M101	2A	19	1	19-Jan	2016		1b	32	32	39	107	68	4	4	54	0	M101_19-Jan_2A	0	0	magic
M101	2A	19	1	19-Jan	2016		1b	32	32	39	107	68	4	4	55	0	M101_19-Jan_2A	0	0	magic
M101	2A	19	1	19-Jan	2016		1b	32	32	39	107	68	4	4	56	0	M101_19-Jan_2A	0	0	magic
M101	2A	19	1	19-Jan	2016		1b	32	32	39	107	68	4	4	57	0	M101_19-Jan_2A	0	0	magic
M101	2B	19	1	19-Jan	2016		1b	32	32	50	103	53	3	3	1	0	M101_19-Jan_2B	0	0	magic
M101	2B	19	1	19-Jan	2016		1b	32	32	50	103	53	3	3	2	1	M101_19-Jan_2B	0.970873786	2	magic
M101	2B	19	1	19-Jan	2016		1b	32	32	50	103	53	3	3	3	14	M101_19-Jan_2B	13.59223301	28	magic
M101	2B	19	1	19-Jan	2016		1b	32	32	50	103	53	3	3	4	17	M101_19-Jan_2B	16.50485437	34	magic
M101	2B	19	1	19-Jan	2016		1b	32	32	50	103	53	3	3	5	11	M101_19-Jan_2B	10.67961165	22	magic
M101	2B	19	1	19-Jan	2016		1b	32	32	50	103	53	3	3	6	5	M101_19-Jan_2B	4.854368932	10	magic
M101	2B	19	1	19-Jan	2016		1b	32	32	50	103	53	3	3	7	2	M101_19-Jan_2B	1.941747573	4	magic
M101	2B	19	1	19-Jan	2016		1b	32	32	50	103	53	3	3	8	3	M101_19-Jan_2B	2.912621359	6	magic
M101	2B	19	1	19-Jan	2016		1b	32	32	50	103	53	3	3	9	3	M101_19-Jan_2B	2.912621359	6	magic
M101	2B	19	1	19-Jan	2016		1b	32	32	50	103	53	3	3	10	1	M101_19-Jan_2B	0.970873786	2	magic
M101	2B	19	1	19-Jan	2016		1b	32	32	50	103	53	3	3	11	1	M101_19-Jan_2B	0.970873786	2	magic
M101	2B	19	1	19-Jan	2016		1b	32	32	50	103	53	3	3	12	0	M101_19-Jan_2B	0	0	magic
M101	2B	19	1	19-Jan	2016		1b	32	32	50	103	53	3	3	13	0	M101_19-Jan_2B	0	0	magic
M101	2B	19	1	19-Jan	2016		1b	32	32	50	103	53	3	3	14	0	M101_19-Jan_2B	0	0	magic
M101	2B	19	1	19-Jan	2016		1b	32	32	50	103	53	3	3	15	0	M101_19-Jan_2B	0	0	magic
M101	2B	19	1	19-Jan	2016		1b	32	32	50	103	53	3	3	16	0	M101_19-Jan_2B	0	0	magic
M101	2B	19	1	19-Jan	2016		1b	32	32	50	103	53	3	3	17	0	M101_19-Jan_2B	0	0	magic
M101	2B	19	1	19-Jan	2016		1b	32	32	50	103	53	3	3	18	0	M101_19-Jan_2B	0	0	magic
M101	2B	19	1	19-Jan	2016		1b	32	32	50	103	53	3	3	19	0	M101_19-Jan_2B	0	0	magic
M101	2B	19	1	19-Jan	2016		1b	32	32	50	103	53	3	3	20	0	M101_19-Jan_2B	0	0	magic
M101	2B	19	1	19-Jan	2016		1b	32	32	50	103	53	3	3	21	0	M101_19-Jan_2B	0	0	magic
M101	2B	19	1	19-Jan	2016		1b	32	32	50	103	53	3	3	22	0	M101_19-Jan_2B	0	0	magic
M101	2B	19	1	19-Jan	2016		1b	32	32	50	103	53	3	3	23	0	M101_19-Jan_2B	0	0	magic
M101	2B	19	1	19-Jan	2016		1b	32	32	50	103	53	3	3	24	0	M101_19-Jan_2B	0	0	magic
M101	2B	19	1	19-Jan	2016		1b	32	32	50	103	53	3	3	25	0	M101_19-Jan_2B	0	0	magic
M101	2B	19	1	19-Jan	2016		1b	32	32	50	103	53	3	3	26	0	M101_19-Jan_2B	0	0	magic
M101	2B	19	1	19-Jan	2016		1b	32	32	50	103	53	3	3	27	1	M101_19-Jan_2B	0.970873786	2	magic
M101	2B	19	1	19-Jan	2016		1b	32	32	50	103	53	3	3	28	0	M101_19-Jan_2B	0	0	magic
M101	2B	19	1	19-Jan	2016		1b	32	32	50	103	53	3	3	29	0	M101_19-Jan_2B	0	0	magic
M101	2B	19	1	19-Jan	2016		1b	32	32	50	103	53	3	3	30	0	M101_19-Jan_2B	0	0	magic
M101	2B	19	1	19-Jan	2016		1b	32	32	50	103	53	3	3	31	0	M101_19-Jan_2B	0	0	magic
M101	2B	19	1	19-Jan	2016		1b	32	32	50	103	53	3	3	32	0	M101_19-Jan_2B	0	0	magic
M101	2B	19	1	19-Jan	2016		1b	32	32	50	103	53	3	3	33	0	M101_19-Jan_2B	0	0	magic
M101	2B	19	1	19-Jan	2016		1b	32	32	50	103	53	3	3	34	0	M101_19-Jan_2B	0	0	magic
M101	2B	19	1	19-Jan	2016		1b	32	32	50	103	53	3	3	35	0	M101_19-Jan_2B	0	0	magic
M101	2B	19	1	19-Jan	2016		1b	32	32	50	103	53	3	3	36	0	M101_19-Jan_2B	0	0	magic
M101	2B	19	1	19-Jan	2016		1b	32	32	50	103	53	3	3	37	0	M101_19-Jan_2B	0	0	magic
M101	2B	19	1	19-Jan	2016		1b	32	32	50	103	53	3	3	38	0	M101_19-Jan_2B	0	0	magic
M101	2B	19	1	19-Jan	2016		1b	32	32	50	103	53	3	3	39	0	M101_19-Jan_2B	0	0	magic
M101	2B	19	1	19-Jan	2016		1b	32	32	50	103	53	3	3	40	0	M101_19-Jan_2B	0	0	magic
M101	2B	19	1	19-Jan	2016		1b	32	32	50	103	53	3	3	41	0	M101_19-Jan_2B	0	0	magic
M101	2B	19	1	19-Jan	2016		1b	32	32	50	103	53	3	3	42	0	M101_19-Jan_2B	0	0	magic
M101	2B	19	1	19-Jan	2016		1b	32	32	50	103	53	3	3	43	0	M101_19-Jan_2B	0	0	magic
M101	2B	19	1	19-Jan	2016		1b	32	32	50	103	53	3	3	44	0	M101_19-Jan_2B	0	0	magic
M101	2B	19	1	19-Jan	2016		1b	32	32	50	103	53	3	3	45	0	M101_19-Jan_2B	0	0	magic
M101	2B	19	1	19-Jan	2016		1b	32	32	50	103	53	3	3	46	0	M101_19-Jan_2B	0	0	magic
M101	2B	19	1	19-Jan	2016		1b	32	32	50	103	53	3	3	47	1	M101_19-Jan_2B	0.970873786	2	magic
M101	2B	19	1	19-Jan	2016		1b	32	32	50	103	53	3	3	48	0	M101_19-Jan_2B	0	0	magic
M101	2B	19	1	19-Jan	2016		1b	32	32	50	103	53	3	3	49	0	M101_19-Jan_2B	0	0	magic
M101	2B	19	1	19-Jan	2016		1b	32	32	50	103	53	3	3	50	0	M101_19-Jan_2B	0	0	magic
M101	2B	19	1	19-Jan	2016		1b	32	32	50	103	53	3	3	51	0	M101_19-Jan_2B	0	0	magic
M101	2B	19	1	19-Jan	2016		1b	32	32	50	103	53	3	3	52	0	M101_19-Jan_2B	0	0	magic
M101	2B	19	1	19-Jan	2016		1b	32	32	50	103	53	3	3	53	0	M101_19-Jan_2B	0	0	magic
M101	2B	19	1	19-Jan	2016		1b	32	32	50	103	53	3	3	54	0	M101_19-Jan_2B	0	0	magic
M101	2B	19	1	19-Jan	2016		1b	32	32	50	103	53	3	3	55	0	M101_19-Jan_2B	0	0	magic
M101	2B	19	1	19-Jan	2016		1b	32	32	50	103	53	3	3	56	0	M101_19-Jan_2B	0	0	magic
M101	2B	19	1	19-Jan	2016		1b	32	32	50	103	53	3	3	57	0	M101_19-Jan_2B	0	0	magic
M101	3a	11	11	11-Nov	2016	31/01/2017	13	42	42	106	108	2	38	2	1	0	M101_11-Nov_3a	0	0	magic
M101	3a	11	11	11-Nov	2016	31/01/2017	13	42	42	106	108	2	38	2	2	2	M101_11-Nov_3a	1.851851852	1.886792453	magic
M101	3a	11	11	11-Nov	2016	31/01/2017	13	42	42	106	108	2	38	2	3	38	M101_11-Nov_3a	35.18518519	35.8490566	magic
M101	3a	11	11	11-Nov	2016	31/01/2017	13	42	42	106	108	2	38	2	4	40	M101_11-Nov_3a	37.03703704	37.73584906	magic
M101	3a	11	11	11-Nov	2016	31/01/2017	13	42	42	106	108	2	38	2	5	14	M101_11-Nov_3a	12.96296296	13.20754717	magic
M101	3a	11	11	11-Nov	2016	31/01/2017	13	42	42	106	108	2	38	2	6	6	M101_11-Nov_3a	5.555555556	5.660377358	magic
M101	3a	11	11	11-Nov	2016	31/01/2017	13	42	42	106	108	2	38	2	7	1	M101_11-Nov_3a	0.925925926	0.943396226	magic
M101	3a	11	11	11-Nov	2016	31/01/2017	13	42	42	106	108	2	38	2	8	2	M101_11-Nov_3a	1.851851852	1.886792453	magic
M101	3a	11	11	11-Nov	2016	31/01/2017	13	42	42	106	108	2	38	2	9	3	M101_11-Nov_3a	2.777777778	2.830188679	magic
M101	3a	11	11	11-Nov	2016	31/01/2017	13	42	42	106	108	2	38	2	10	0	M101_11-Nov_3a	0	0	magic
M101	3a	11	11	11-Nov	2016	31/01/2017	13	42	42	106	108	2	38	2	11	0	M101_11-Nov_3a	0	0	magic
M101	3a	11	11	11-Nov	2016	31/01/2017	13	42	42	106	108	2	38	2	12	0	M101_11-Nov_3a	0	0	magic
M101	3a	11	11	11-Nov	2016	31/01/2017	13	42	42	106	108	2	38	2	13	0	M101_11-Nov_3a	0	0	magic
M101	3a	11	11	11-Nov	2016	31/01/2017	13	42	42	106	108	2	38	2	14	0	M101_11-Nov_3a	0	0	magic
M101	3a	11	11	11-Nov	2016	31/01/2017	13	42	42	106	108	2	38	2	15	0	M101_11-Nov_3a	0	0	magic
M101	3a	11	11	11-Nov	2016	31/01/2017	13	42	42	106	108	2	38	2	16	0	M101_11-Nov_3a	0	0	magic
M101	3a	11	11	11-Nov	2016	31/01/2017	13	42	42	106	108	2	38	2	17	0	M101_11-Nov_3a	0	0	magic
M101	3a	11	11	11-Nov	2016	31/01/2017	13	42	42	106	108	2	38	2	18	0	M101_11-Nov_3a	0	0	magic
M101	3a	11	11	11-Nov	2016	31/01/2017	13	42	42	106	108	2	38	2	19	0	M101_11-Nov_3a	0	0	magic
M101	3a	11	11	11-Nov	2016	31/01/2017	13	42	42	106	108	2	38	2	20	0	M101_11-Nov_3a	0	0	magic
M101	3a	11	11	11-Nov	2016	31/01/2017	13	42	42	106	108	2	38	2	21	0	M101_11-Nov_3a	0	0	magic
M101	3a	11	11	11-Nov	2016	31/01/2017	13	42	42	106	108	2	38	2	22	0	M101_11-Nov_3a	0	0	magic
M101	3a	11	11	11-Nov	2016	31/01/2017	13	42	42	106	108	2	38	2	23	0	M101_11-Nov_3a	0	0	magic
M101	3a	11	11	11-Nov	2016	31/01/2017	13	42	42	106	108	2	38	2	24	0	M101_11-Nov_3a	0	0	magic
M101	3a	11	11	11-Nov	2016	31/01/2017	13	42	42	106	108	2	38	2	25	0	M101_11-Nov_3a	0	0	magic
M101	3a	11	11	11-Nov	2016	31/01/2017	13	42	42	106	108	2	38	2	26	0	M101_11-Nov_3a	0	0	magic
M101	3a	11	11	11-Nov	2016	31/01/2017	13	42	42	106	108	2	38	2	27	0	M101_11-Nov_3a	0	0	magic
M101	3a	11	11	11-Nov	2016	31/01/2017	13	42	42	106	108	2	38	2	28	0	M101_11-Nov_3a	0	0	magic
M101	3a	11	11	11-Nov	2016	31/01/2017	13	42	42	106	108	2	38	2	29	0	M101_11-Nov_3a	0	0	magic
M101	3a	11	11	11-Nov	2016	31/01/2017	13	42	42	106	108	2	38	2	30	0	M101_11-Nov_3a	0	0	magic
M101	3a	11	11	11-Nov	2016	31/01/2017	13	42	42	106	108	2	38	2	31	0	M101_11-Nov_3a	0	0	magic
M101	3a	11	11	11-Nov	2016	31/01/2017	13	42	42	106	108	2	38	2	32	0	M101_11-Nov_3a	0	0	magic
M101	3a	11	11	11-Nov	2016	31/01/2017	13	42	42	106	108	2	38	2	33	0	M101_11-Nov_3a	0	0	magic
M101	3a	11	11	11-Nov	2016	31/01/2017	13	42	42	106	108	2	38	2	34	0	M101_11-Nov_3a	0	0	magic
M101	3a	11	11	11-Nov	2016	31/01/2017	13	42	42	106	108	2	38	2	35	0	M101_11-Nov_3a	0	0	magic
M101	3a	11	11	11-Nov	2016	31/01/2017	13	42	42	106	108	2	38	2	36	0	M101_11-Nov_3a	0	0	magic
M101	3a	11	11	11-Nov	2016	31/01/2017	13	42	42	106	108	2	38	2	37	0	M101_11-Nov_3a	0	0	magic
M101	3a	11	11	11-Nov	2016	31/01/2017	13	42	42	106	108	2	38	2	38	0	M101_11-Nov_3a	0	0	magic
M101	3a	11	11	11-Nov	2016	31/01/2017	13	42	42	106	108	2	38	2	39	0	M101_11-Nov_3a	0	0	magic
M101	3a	11	11	11-Nov	2016	31/01/2017	13	42	42	106	108	2	38	2	40	0	M101_11-Nov_3a	0	0	magic
M101	3a	11	11	11-Nov	2016	31/01/2017	13	42	42	106	108	2	38	2	41	0	M101_11-Nov_3a	0	0	magic
M101	3a	11	11	11-Nov	2016	31/01/2017	13	42	42	106	108	2	38	2	42	0	M101_11-Nov_3a	0	0	magic
M101	3a	11	11	11-Nov	2016	31/01/2017	13	42	42	106	108	2	38	2	43	0	M101_11-Nov_3a	0	0	magic
M101	3a	11	11	11-Nov	2016	31/01/2017	13	42	42	106	108	2	38	2	44	0	M101_11-Nov_3a	0	0	magic
M101	3a	11	11	11-Nov	2016	31/01/2017	13	42	42	106	108	2	38	2	45	0	M101_11-Nov_3a	0	0	magic
M101	3a	11	11	11-Nov	2016	31/01/2017	13	42	42	106	108	2	38	2	46	0	M101_11-Nov_3a	0	0	magic
M101	3a	11	11	11-Nov	2016	31/01/2017	13	42	42	106	108	2	38	2	47	0	M101_11-Nov_3a	0	0	magic
M101	3a	11	11	11-Nov	2016	31/01/2017	13	42	42	106	108	2	38	2	48	0	M101_11-Nov_3a	0	0	magic
M101	3a	11	11	11-Nov	2016	31/01/2017	13	42	42	106	108	2	38	2	49	0	M101_11-Nov_3a	0	0	magic
M101	3a	11	11	11-Nov	2016	31/01/2017	13	42	42	106	108	2	38	2	50	0	M101_11-Nov_3a	0	0	magic
M101	3a	11	11	11-Nov	2016	31/01/2017	13	42	42	106	108	2	38	2	51	0	M101_11-Nov_3a	0	0	magic
M101	3a	11	11	11-Nov	2016	31/01/2017	13	42	42	106	108	2	38	2	52	0	M101_11-Nov_3a	0	0	magic
M101	3a	11	11	11-Nov	2016	31/01/2017	13	42	42	106	108	2	38	2	53	0	M101_11-Nov_3a	0	0	magic
M101	3a	11	11	11-Nov	2016	31/01/2017	13	42	42	106	108	2	38	2	54	0	M101_11-Nov_3a	0	0	magic
M101	3a	11	11	11-Nov	2016	31/01/2017	13	42	42	106	108	2	38	2	55	0	M101_11-Nov_3a	0	0	magic
M101	3a	11	11	11-Nov	2016	31/01/2017	13	42	42	106	108	2	38	2	56	0	M101_11-Nov_3a	0	0	magic
M101	3a	11	11	11-Nov	2016	31/01/2017	13	42	42	106	108	2	38	2	57	0	M101_11-Nov_3a	0	0	magic
M101	3a	11	11	11-Nov	2016	31/01/2017	13	42	42	106	108	2	38	2	58	0	M101_11-Nov_3a	0	0	magic
M101	3a	11	11	11-Nov	2016	31/01/2017	13	42	42	106	108	2	38	2	59	0	M101_11-Nov_3a	0	0	magic
M101	3a	11	11	11-Nov	2016	31/01/2017	13	42	42	106	108	2	38	2	60	0	M101_11-Nov_3a	0	0	magic
M101	3a	11	11	11-Nov	2016	31/01/2017	13	42	42	106	108	2	38	2	61	0	M101_11-Nov_3a	0	0	magic
M101	3a	11	11	11-Nov	2016	31/01/2017	13	42	42	106	108	2	38	2	62	0	M101_11-Nov_3a	0	0	magic
M101	3a	11	11	11-Nov	2016	31/01/2017	13	42	42	106	108	2	38	2	63	0	M101_11-Nov_3a	0	0	magic
M101	3a	11	11	11-Nov	2016	31/01/2017	13	42	42	106	108	2	38	2	64	0	M101_11-Nov_3a	0	0	magic
M101	3a	11	11	11-Nov	2016	31/01/2017	13	42	42	106	108	2	38	2	65	0	M101_11-Nov_3a	0	0	magic
M101	3a	11	11	11-Nov	2016	31/01/2017	13	42	42	106	108	2	38	2	66	0	M101_11-Nov_3a	0	0	magic
M101	3a	11	11	11-Nov	2016	31/01/2017	13	42	42	106	108	2	38	2	67	0	M101_11-Nov_3a	0	0	magic
M101	3a	11	11	11-Nov	2016	31/01/2017	13	42	42	106	108	2	38	2	68	0	M101_11-Nov_3a	0	0	magic
M101	3a	11	11	11-Nov	2016	31/01/2017	13	42	42	106	108	2	38	2	69	0	M101_11-Nov_3a	0	0	magic
M101	3a	11	11	11-Nov	2016	31/01/2017	13	42	42	106	108	2	38	2	70	0	M101_11-Nov_3a	0	0	magic
M101	3a	11	11	11-Nov	2016	31/01/2017	13	42	42	106	108	2	38	2	71	0	M101_11-Nov_3a	0	0	magic
M101	3a	11	11	11-Nov	2016	31/01/2017	13	42	42	106	108	2	38	2	72	0	M101_11-Nov_3a	0	0	magic
M101	3b	25	11	25-Nov	2016	31/01/2017	13	31	31	100	118	18	44	2	1	0	M101_25-Nov_3b	0	0	magic
M101	3b	25	11	25-Nov	2016	31/01/2017	13	31	31	100	118	18	44	2	2	0	M101_25-Nov_3b	0	0	magic
M101	3b	25	11	25-Nov	2016	31/01/2017	13	31	31	100	118	18	44	2	3	41	M101_25-Nov_3b	34.74576271	41	magic
M101	3b	25	11	25-Nov	2016	31/01/2017	13	31	31	100	118	18	44	2	4	28	M101_25-Nov_3b	23.72881356	28	magic
M101	3b	25	11	25-Nov	2016	31/01/2017	13	31	31	100	118	18	44	2	5	18	M101_25-Nov_3b	15.25423729	18	magic
M101	3b	25	11	25-Nov	2016	31/01/2017	13	31	31	100	118	18	44	2	6	4	M101_25-Nov_3b	3.389830508	4	magic
M101	3b	25	11	25-Nov	2016	31/01/2017	13	31	31	100	118	18	44	2	7	3	M101_25-Nov_3b	2.542372881	3	magic
M101	3b	25	11	25-Nov	2016	31/01/2017	13	31	31	100	118	18	44	2	8	3	M101_25-Nov_3b	2.542372881	3	magic
M101	3b	25	11	25-Nov	2016	31/01/2017	13	31	31	100	118	18	44	2	9	1	M101_25-Nov_3b	0.847457627	1	magic
M101	3b	25	11	25-Nov	2016	31/01/2017	13	31	31	100	118	18	44	2	10	0	M101_25-Nov_3b	0	0	magic
M101	3b	25	11	25-Nov	2016	31/01/2017	13	31	31	100	118	18	44	2	11	0	M101_25-Nov_3b	0	0	magic
M101	3b	25	11	25-Nov	2016	31/01/2017	13	31	31	100	118	18	44	2	12	0	M101_25-Nov_3b	0	0	magic
M101	3b	25	11	25-Nov	2016	31/01/2017	13	31	31	100	118	18	44	2	13	0	M101_25-Nov_3b	0	0	magic
M101	3b	25	11	25-Nov	2016	31/01/2017	13	31	31	100	118	18	44	2	14	0	M101_25-Nov_3b	0	0	magic
M101	3b	25	11	25-Nov	2016	31/01/2017	13	31	31	100	118	18	44	2	15	0	M101_25-Nov_3b	0	0	magic
M101	3b	25	11	25-Nov	2016	31/01/2017	13	31	31	100	118	18	44	2	16	0	M101_25-Nov_3b	0	0	magic
M101	3b	25	11	25-Nov	2016	31/01/2017	13	31	31	100	118	18	44	2	17	0	M101_25-Nov_3b	0	0	magic
M101	3b	25	11	25-Nov	2016	31/01/2017	13	31	31	100	118	18	44	2	18	0	M101_25-Nov_3b	0	0	magic
M101	3b	25	11	25-Nov	2016	31/01/2017	13	31	31	100	118	18	44	2	19	0	M101_25-Nov_3b	0	0	magic
M101	3b	25	11	25-Nov	2016	31/01/2017	13	31	31	100	118	18	44	2	20	0	M101_25-Nov_3b	0	0	magic
M101	3b	25	11	25-Nov	2016	31/01/2017	13	31	31	100	118	18	44	2	21	0	M101_25-Nov_3b	0	0	magic
M101	3b	25	11	25-Nov	2016	31/01/2017	13	31	31	100	118	18	44	2	22	0	M101_25-Nov_3b	0	0	magic
M101	3b	25	11	25-Nov	2016	31/01/2017	13	31	31	100	118	18	44	2	23	0	M101_25-Nov_3b	0	0	magic
M101	3b	25	11	25-Nov	2016	31/01/2017	13	31	31	100	118	18	44	2	24	0	M101_25-Nov_3b	0	0	magic
M101	3b	25	11	25-Nov	2016	31/01/2017	13	31	31	100	118	18	44	2	25	0	M101_25-Nov_3b	0	0	magic
M101	3b	25	11	25-Nov	2016	31/01/2017	13	31	31	100	118	18	44	2	26	1	M101_25-Nov_3b	0.847457627	1	magic
M101	3b	25	11	25-Nov	2016	31/01/2017	13	31	31	100	118	18	44	2	27	0	M101_25-Nov_3b	0	0	magic
M101	3b	25	11	25-Nov	2016	31/01/2017	13	31	31	100	118	18	44	2	28	0	M101_25-Nov_3b	0	0	magic
M101	3b	25	11	25-Nov	2016	31/01/2017	13	31	31	100	118	18	44	2	29	0	M101_25-Nov_3b	0	0	magic
M101	3b	25	11	25-Nov	2016	31/01/2017	13	31	31	100	118	18	44	2	30	0	M101_25-Nov_3b	0	0	magic
M101	3b	25	11	25-Nov	2016	31/01/2017	13	31	31	100	118	18	44	2	31	0	M101_25-Nov_3b	0	0	magic
M101	3b	25	11	25-Nov	2016	31/01/2017	13	31	31	100	118	18	44	2	32	1	M101_25-Nov_3b	0.847457627	1	magic
M101	3b	25	11	25-Nov	2016	31/01/2017	13	31	31	100	118	18	44	2	33	0	M101_25-Nov_3b	0	0	magic
M101	3b	25	11	25-Nov	2016	31/01/2017	13	31	31	100	118	18	44	2	34	0	M101_25-Nov_3b	0	0	magic
M101	3b	25	11	25-Nov	2016	31/01/2017	13	31	31	100	118	18	44	2	35	0	M101_25-Nov_3b	0	0	magic
M101	3b	25	11	25-Nov	2016	31/01/2017	13	31	31	100	118	18	44	2	36	0	M101_25-Nov_3b	0	0	magic
M101	3b	25	11	25-Nov	2016	31/01/2017	13	31	31	100	118	18	44	2	37	0	M101_25-Nov_3b	0	0	magic
M101	3b	25	11	25-Nov	2016	31/01/2017	13	31	31	100	118	18	44	2	38	0	M101_25-Nov_3b	0	0	magic
M101	3b	25	11	25-Nov	2016	31/01/2017	13	31	31	100	118	18	44	2	39	0	M101_25-Nov_3b	0	0	magic
M101	3b	25	11	25-Nov	2016	31/01/2017	13	31	31	100	118	18	44	2	40	0	M101_25-Nov_3b	0	0	magic
M101	3b	25	11	25-Nov	2016	31/01/2017	13	31	31	100	118	18	44	2	41	0	M101_25-Nov_3b	0	0	magic
M101	3b	25	11	25-Nov	2016	31/01/2017	13	31	31	100	118	18	44	2	42	0	M101_25-Nov_3b	0	0	magic
M101	3b	25	11	25-Nov	2016	31/01/2017	13	31	31	100	118	18	44	2	43	0	M101_25-Nov_3b	0	0	magic
M101	3b	25	11	25-Nov	2016	31/01/2017	13	31	31	100	118	18	44	2	44	0	M101_25-Nov_3b	0	0	magic
M101	3b	25	11	25-Nov	2016	31/01/2017	13	31	31	100	118	18	44	2	45	0	M101_25-Nov_3b	0	0	magic
M101	3b	25	11	25-Nov	2016	31/01/2017	13	31	31	100	118	18	44	2	46	0	M101_25-Nov_3b	0	0	magic
M101	3b	25	11	25-Nov	2016	31/01/2017	13	31	31	100	118	18	44	2	47	0	M101_25-Nov_3b	0	0	magic
M101	3b	25	11	25-Nov	2016	31/01/2017	13	31	31	100	118	18	44	2	48	0	M101_25-Nov_3b	0	0	magic
M101	3b	25	11	25-Nov	2016	31/01/2017	13	31	31	100	118	18	44	2	49	0	M101_25-Nov_3b	0	0	magic
M101	3b	25	11	25-Nov	2016	31/01/2017	13	31	31	100	118	18	44	2	50	0	M101_25-Nov_3b	0	0	magic
M101	3b	25	11	25-Nov	2016	31/01/2017	13	31	31	100	118	18	44	2	51	0	M101_25-Nov_3b	0	0	magic
M101	3b	25	11	25-Nov	2016	31/01/2017	13	31	31	100	118	18	44	2	52	0	M101_25-Nov_3b	0	0	magic
M101	3b	25	11	25-Nov	2016	31/01/2017	13	31	31	100	118	18	44	2	53	0	M101_25-Nov_3b	0	0	magic
M101	3b	25	11	25-Nov	2016	31/01/2017	13	31	31	100	118	18	44	2	54	0	M101_25-Nov_3b	0	0	magic
M101	3b	25	11	25-Nov	2016	31/01/2017	13	31	31	100	118	18	44	2	55	0	M101_25-Nov_3b	0	0	magic
M101	3b	25	11	25-Nov	2016	31/01/2017	13	31	31	100	118	18	44	2	56	0	M101_25-Nov_3b	0	0	magic
M101	3b	25	11	25-Nov	2016	31/01/2017	13	31	31	100	118	18	44	2	57	0	M101_25-Nov_3b	0	0	magic
M101	3b	25	11	25-Nov	2016	31/01/2017	13	31	31	100	118	18	44	2	58	0	M101_25-Nov_3b	0	0	magic
M101	3b	25	11	25-Nov	2016	31/01/2017	13	31	31	100	118	18	44	2	59	0	M101_25-Nov_3b	0	0	magic
M101	3b	25	11	25-Nov	2016	31/01/2017	13	31	31	100	118	18	44	2	60	0	M101_25-Nov_3b	0	0	magic
M101	3b	25	11	25-Nov	2016	31/01/2017	13	31	31	100	118	18	44	2	61	0	M101_25-Nov_3b	0	0	magic
M101	3b	25	11	25-Nov	2016	31/01/2017	13	31	31	100	118	18	44	2	62	0	M101_25-Nov_3b	0	0	magic
M101	3b	25	11	25-Nov	2016	31/01/2017	13	31	31	100	118	18	44	2	63	0	M101_25-Nov_3b	0	0	magic
M101	3b	25	11	25-Nov	2016	31/01/2017	13	31	31	100	118	18	44	2	64	0	M101_25-Nov_3b	0	0	magic
M101	3b	25	11	25-Nov	2016	31/01/2017	13	31	31	100	118	18	44	2	65	0	M101_25-Nov_3b	0	0	magic
M101	3b	25	11	25-Nov	2016	31/01/2017	13	31	31	100	118	18	44	2	66	0	M101_25-Nov_3b	0	0	magic
M101	3b	25	11	25-Nov	2016	31/01/2017	13	31	31	100	118	18	44	2	67	0	M101_25-Nov_3b	0	0	magic
M101	3b	25	11	25-Nov	2016	31/01/2017	13	31	31	100	118	18	44	2	68	0	M101_25-Nov_3b	0	0	magic
M101	3b	25	11	25-Nov	2016	31/01/2017	13	31	31	100	118	18	44	2	69	0	M101_25-Nov_3b	0	0	magic
M101	3b	25	11	25-Nov	2016	31/01/2017	13	31	31	100	118	18	44	2	70	0	M101_25-Nov_3b	0	0	magic
M101	3b	25	11	25-Nov	2016	31/01/2017	13	31	31	100	118	18	44	2	71	0	M101_25-Nov_3b	0	0	magic
M101	3b	25	11	25-Nov	2016	31/01/2017	13	31	31	100	118	18	44	2	72	0	M101_25-Nov_3b	0	0	magic
M101	4	25	11	25-Nov	2016	31/01/2017	13	31	31	84	112	28	45	3	1	0	M101_25-Nov_4	0	0	magic
M101	4	25	11	25-Nov	2016	31/01/2017	13	31	31	84	112	28	45	3	2	0	M101_25-Nov_4	0	0	magic
M101	4	25	11	25-Nov	2016	31/01/2017	13	31	31	84	112	28	45	3	3	17	M101_25-Nov_4	15.17857143	20.23809524	magic
M101	4	25	11	25-Nov	2016	31/01/2017	13	31	31	84	112	28	45	3	4	10	M101_25-Nov_4	8.928571429	11.9047619	magic
M101	4	25	11	25-Nov	2016	31/01/2017	13	31	31	84	112	28	45	3	5	7	M101_25-Nov_4	6.25	8.333333333	magic
M101	4	25	11	25-Nov	2016	31/01/2017	13	31	31	84	112	28	45	3	6	4	M101_25-Nov_4	3.571428571	4.761904762	magic
M101	4	25	11	25-Nov	2016	31/01/2017	13	31	31	84	112	28	45	3	7	4	M101_25-Nov_4	3.571428571	4.761904762	magic
M101	4	25	11	25-Nov	2016	31/01/2017	13	31	31	84	112	28	45	3	8	3	M101_25-Nov_4	2.678571429	3.571428571	magic
M101	4	25	11	25-Nov	2016	31/01/2017	13	31	31	84	112	28	45	3	9	14	M101_25-Nov_4	12.5	16.66666667	magic
M101	4	25	11	25-Nov	2016	31/01/2017	13	31	31	84	112	28	45	3	10	5	M101_25-Nov_4	4.464285714	5.952380952	magic
M101	4	25	11	25-Nov	2016	31/01/2017	13	31	31	84	112	28	45	3	11	7	M101_25-Nov_4	6.25	8.333333333	magic
M101	4	25	11	25-Nov	2016	31/01/2017	13	31	31	84	112	28	45	3	12	2	M101_25-Nov_4	1.785714286	2.380952381	magic
M101	4	25	11	25-Nov	2016	31/01/2017	13	31	31	84	112	28	45	3	13	2	M101_25-Nov_4	1.785714286	2.380952381	magic
M101	4	25	11	25-Nov	2016	31/01/2017	13	31	31	84	112	28	45	3	14	0	M101_25-Nov_4	0	0	magic
M101	4	25	11	25-Nov	2016	31/01/2017	13	31	31	84	112	28	45	3	15	1	M101_25-Nov_4	0.892857143	1.19047619	magic
M101	4	25	11	25-Nov	2016	31/01/2017	13	31	31	84	112	28	45	3	16	0	M101_25-Nov_4	0	0	magic
M101	4	25	11	25-Nov	2016	31/01/2017	13	31	31	84	112	28	45	3	17	0	M101_25-Nov_4	0	0	magic
M101	4	25	11	25-Nov	2016	31/01/2017	13	31	31	84	112	28	45	3	18	0	M101_25-Nov_4	0	0	magic
M101	4	25	11	25-Nov	2016	31/01/2017	13	31	31	84	112	28	45	3	19	0	M101_25-Nov_4	0	0	magic
M101	4	25	11	25-Nov	2016	31/01/2017	13	31	31	84	112	28	45	3	20	0	M101_25-Nov_4	0	0	magic
M101	4	25	11	25-Nov	2016	31/01/2017	13	31	31	84	112	28	45	3	21	0	M101_25-Nov_4	0	0	magic
M101	4	25	11	25-Nov	2016	31/01/2017	13	31	31	84	112	28	45	3	22	0	M101_25-Nov_4	0	0	magic
M101	4	25	11	25-Nov	2016	31/01/2017	13	31	31	84	112	28	45	3	23	0	M101_25-Nov_4	0	0	magic
M101	4	25	11	25-Nov	2016	31/01/2017	13	31	31	84	112	28	45	3	24	0	M101_25-Nov_4	0	0	magic
M101	4	25	11	25-Nov	2016	31/01/2017	13	31	31	84	112	28	45	3	25	0	M101_25-Nov_4	0	0	magic
M101	4	25	11	25-Nov	2016	31/01/2017	13	31	31	84	112	28	45	3	26	1	M101_25-Nov_4	0.892857143	1.19047619	magic
M101	4	25	11	25-Nov	2016	31/01/2017	13	31	31	84	112	28	45	3	27	0	M101_25-Nov_4	0	0	magic
M101	4	25	11	25-Nov	2016	31/01/2017	13	31	31	84	112	28	45	3	28	0	M101_25-Nov_4	0	0	magic
M101	4	25	11	25-Nov	2016	31/01/2017	13	31	31	84	112	28	45	3	29	0	M101_25-Nov_4	0	0	magic
M101	4	25	11	25-Nov	2016	31/01/2017	13	31	31	84	112	28	45	3	30	0	M101_25-Nov_4	0	0	magic
M101	4	25	11	25-Nov	2016	31/01/2017	13	31	31	84	112	28	45	3	31	0	M101_25-Nov_4	0	0	magic
M101	4	25	11	25-Nov	2016	31/01/2017	13	31	31	84	112	28	45	3	32	1	M101_25-Nov_4	0.892857143	1.19047619	magic
M101	4	25	11	25-Nov	2016	31/01/2017	13	31	31	84	112	28	45	3	33	0	M101_25-Nov_4	0	0	magic
M101	4	25	11	25-Nov	2016	31/01/2017	13	31	31	84	112	28	45	3	34	0	M101_25-Nov_4	0	0	magic
M101	4	25	11	25-Nov	2016	31/01/2017	13	31	31	84	112	28	45	3	35	0	M101_25-Nov_4	0	0	magic
M101	4	25	11	25-Nov	2016	31/01/2017	13	31	31	84	112	28	45	3	36	0	M101_25-Nov_4	0	0	magic
M101	4	25	11	25-Nov	2016	31/01/2017	13	31	31	84	112	28	45	3	37	0	M101_25-Nov_4	0	0	magic
M101	4	25	11	25-Nov	2016	31/01/2017	13	31	31	84	112	28	45	3	38	0	M101_25-Nov_4	0	0	magic
M101	4	25	11	25-Nov	2016	31/01/2017	13	31	31	84	112	28	45	3	39	0	M101_25-Nov_4	0	0	magic
M101	4	25	11	25-Nov	2016	31/01/2017	13	31	31	84	112	28	45	3	40	0	M101_25-Nov_4	0	0	magic
M101	4	25	11	25-Nov	2016	31/01/2017	13	31	31	84	112	28	45	3	41	0	M101_25-Nov_4	0	0	magic
M101	4	25	11	25-Nov	2016	31/01/2017	13	31	31	84	112	28	45	3	42	0	M101_25-Nov_4	0	0	magic
M101	4	25	11	25-Nov	2016	31/01/2017	13	31	31	84	112	28	45	3	43	0	M101_25-Nov_4	0	0	magic
M101	4	25	11	25-Nov	2016	31/01/2017	13	31	31	84	112	28	45	3	44	0	M101_25-Nov_4	0	0	magic
M101	4	25	11	25-Nov	2016	31/01/2017	13	31	31	84	112	28	45	3	45	1	M101_25-Nov_4	0.892857143	1.19047619	magic
M101	4	25	11	25-Nov	2016	31/01/2017	13	31	31	84	112	28	45	3	46	1	M101_25-Nov_4	0.892857143	1.19047619	magic
M101	4	25	11	25-Nov	2016	31/01/2017	13	31	31	84	112	28	45	3	47	1	M101_25-Nov_4	0.892857143	1.19047619	magic
M101	4	25	11	25-Nov	2016	31/01/2017	13	31	31	84	112	28	45	3	48	0	M101_25-Nov_4	0	0	magic
M101	4	25	11	25-Nov	2016	31/01/2017	13	31	31	84	112	28	45	3	49	0	M101_25-Nov_4	0	0	magic
M101	4	25	11	25-Nov	2016	31/01/2017	13	31	31	84	112	28	45	3	50	0	M101_25-Nov_4	0	0	magic
M101	4	25	11	25-Nov	2016	31/01/2017	13	31	31	84	112	28	45	3	51	0	M101_25-Nov_4	0	0	magic
M101	4	25	11	25-Nov	2016	31/01/2017	13	31	31	84	112	28	45	3	52	0	M101_25-Nov_4	0	0	magic
M101	4	25	11	25-Nov	2016	31/01/2017	13	31	31	84	112	28	45	3	53	0	M101_25-Nov_4	0	0	magic
M101	4	25	11	25-Nov	2016	31/01/2017	13	31	31	84	112	28	45	3	54	0	M101_25-Nov_4	0	0	magic
M101	4	25	11	25-Nov	2016	31/01/2017	13	31	31	84	112	28	45	3	55	1	M101_25-Nov_4	0.892857143	1.19047619	magic
M101	4	25	11	25-Nov	2016	31/01/2017	13	31	31	84	112	28	45	3	56	0	M101_25-Nov_4	0	0	magic
M101	4	25	11	25-Nov	2016	31/01/2017	13	31	31	84	112	28	45	3	57	0	M101_25-Nov_4	0	0	magic
M101	4	25	11	25-Nov	2016	31/01/2017	13	31	31	84	112	28	45	3	58	0	M101_25-Nov_4	0	0	magic
M101	4	25	11	25-Nov	2016	31/01/2017	13	31	31	84	112	28	45	3	59	0	M101_25-Nov_4	0	0	magic
M101	4	25	11	25-Nov	2016	31/01/2017	13	31	31	84	112	28	45	3	60	0	M101_25-Nov_4	0	0	magic
M101	4	25	11	25-Nov	2016	31/01/2017	13	31	31	84	112	28	45	3	61	1	M101_25-Nov_4	0.892857143	1.19047619	magic
M101	4	25	11	25-Nov	2016	31/01/2017	13	31	31	84	112	28	45	3	62	1	M101_25-Nov_4	0.892857143	1.19047619	magic
M101	4	25	11	25-Nov	2016	31/01/2017	13	31	31	84	112	28	45	3	63	0	M101_25-Nov_4	0	0	magic
M101	4	25	11	25-Nov	2016	31/01/2017	13	31	31	84	112	28	45	3	64	0	M101_25-Nov_4	0	0	magic
M101	4	25	11	25-Nov	2016	31/01/2017	13	31	31	84	112	28	45	3	65	0	M101_25-Nov_4	0	0	magic
M101	4	25	11	25-Nov	2016	31/01/2017	13	31	31	84	112	28	45	3	66	0	M101_25-Nov_4	0	0	magic
M101	4	25	11	25-Nov	2016	31/01/2017	13	31	31	84	112	28	45	3	67	0	M101_25-Nov_4	0	0	magic
M101	4	25	11	25-Nov	2016	31/01/2017	13	31	31	84	112	28	45	3	68	0	M101_25-Nov_4	0	0	magic
M101	4	25	11	25-Nov	2016	31/01/2017	13	31	31	84	112	28	45	3	69	0	M101_25-Nov_4	0	0	magic
M101	4	25	11	25-Nov	2016	31/01/2017	13	31	31	84	112	28	45	3	70	0	M101_25-Nov_4	0	0	magic
M101	4	25	11	25-Nov	2016	31/01/2017	13	31	31	84	112	28	45	3	71	0	M101_25-Nov_4	0	0	magic
M101	4	25	11	25-Nov	2016	31/01/2017	13	31	31	84	112	28	45	3	72	0	M101_25-Nov_4	0	0	magic
M101	4A	17	9	17-Sep	2015		1	31	31	78	89	11	25	1	1	0	M101_17-Sep_4A	0	0	magic
M101	4A	17	9	17-Sep	2015		1	31	31	78	89	11	25	1	2	30	M101_17-Sep_4A	33.70786517	38.46153846	magic
M101	4A	17	9	17-Sep	2015		1	31	31	78	89	11	25	1	3	37	M101_17-Sep_4A	41.57303371	47.43589744	magic
M101	4A	17	9	17-Sep	2015		1	31	31	78	89	11	25	1	4	8	M101_17-Sep_4A	8.988764045	10.25641026	magic
M101	4A	17	9	17-Sep	2015		1	31	31	78	89	11	25	1	5	1	M101_17-Sep_4A	1.123595506	1.282051282	magic
M101	4A	17	9	17-Sep	2015		1	31	31	78	89	11	25	1	6	1	M101_17-Sep_4A	1.123595506	1.282051282	magic
M101	4A	17	9	17-Sep	2015		1	31	31	78	89	11	25	1	7	0	M101_17-Sep_4A	0	0	magic
M101	4A	17	9	17-Sep	2015		1	31	31	78	89	11	25	1	8	1	M101_17-Sep_4A	1.123595506	1.282051282	magic
M101	4A	17	9	17-Sep	2015		1	31	31	78	89	11	25	1	9	0	M101_17-Sep_4A	0	0	magic
M101	4A	17	9	17-Sep	2015		1	31	31	78	89	11	25	1	10	0	M101_17-Sep_4A	0	0	magic
M101	4A	17	9	17-Sep	2015		1	31	31	78	89	11	25	1	11	0	M101_17-Sep_4A	0	0	magic
M101	4A	17	9	17-Sep	2015		1	31	31	78	89	11	25	1	12	0	M101_17-Sep_4A	0	0	magic
M101	4A	17	9	17-Sep	2015		1	31	31	78	89	11	25	1	13	0	M101_17-Sep_4A	0	0	magic
M101	5	7	3	7-Mar	2016		3	33	33	35	155	120	11	3	1	0	M101_07-Mar_5	0	0	magic
M101	5	7	3	7-Mar	2016		3	33	33	35	155	120	11	3	2	0	M101_07-Mar_5	0	0	magic
M101	5	7	3	7-Mar	2016		3	33	33	35	155	120	11	3	3	0	M101_07-Mar_5	0	0	magic
M101	5	7	3	7-Mar	2016		3	33	33	35	155	120	11	3	4	1	M101_07-Mar_5	0.64516129	2.857142857	magic
M101	5	7	3	7-Mar	2016		3	33	33	35	155	120	11	3	5	4	M101_07-Mar_5	2.580645161	11.42857143	magic
M101	5	7	3	7-Mar	2016		3	33	33	35	155	120	11	3	6	6	M101_07-Mar_5	3.870967742	17.14285714	magic
M101	5	7	3	7-Mar	2016		3	33	33	35	155	120	11	3	7	4	M101_07-Mar_5	2.580645161	11.42857143	magic
M101	5	7	3	7-Mar	2016		3	33	33	35	155	120	11	3	8	1	M101_07-Mar_5	0.64516129	2.857142857	magic
M101	5	7	3	7-Mar	2016		3	33	33	35	155	120	11	3	9	3	M101_07-Mar_5	1.935483871	8.571428571	magic
M101	5	7	3	7-Mar	2016		3	33	33	35	155	120	11	3	10	0	M101_07-Mar_5	0	0	magic
M101	5	7	3	7-Mar	2016		3	33	33	35	155	120	11	3	11	11	M101_07-Mar_5	7.096774194	31.42857143	magic
M101	5	7	3	7-Mar	2016		3	33	33	35	155	120	11	3	12	3	M101_07-Mar_5	1.935483871	8.571428571	magic
M101	5	7	3	7-Mar	2016		3	33	33	35	155	120	11	3	13	1	M101_07-Mar_5	0.64516129	2.857142857	magic
M101	5	7	3	7-Mar	2016		3	33	33	35	155	120	11	3	14	0	M101_07-Mar_5	0	0	magic
M101	5	7	3	7-Mar	2016		3	33	33	35	155	120	11	3	15	1	M101_07-Mar_5	0.64516129	2.857142857	magic
M103	2	26	2	26-Feb	2016		3	28	28	34	174	140	48	3	1	0	M103_26-Feb_2	0	0	magic
M103	2	26	2	26-Feb	2016		3	28	28	34	174	140	48	3	2	0	M103_26-Feb_2	0	0	magic
M103	2	26	2	26-Feb	2016		3	28	28	34	174	140	48	3	3	4	M103_26-Feb_2	2.298850575	11.76470588	magic
M103	2	26	2	26-Feb	2016		3	28	28	34	174	140	48	3	4	13	M103_26-Feb_2	7.471264368	38.23529412	magic
M103	2	26	2	26-Feb	2016		3	28	28	34	174	140	48	3	5	11	M103_26-Feb_2	6.32183908	32.35294118	magic
M103	2	26	2	26-Feb	2016		3	28	28	34	174	140	48	3	6	4	M103_26-Feb_2	2.298850575	11.76470588	magic
M103	2	26	2	26-Feb	2016		3	28	28	34	174	140	48	3	7	1	M103_26-Feb_2	0.574712644	2.941176471	magic
M103	2	26	2	26-Feb	2016		3	28	28	34	174	140	48	3	8	0	M103_26-Feb_2	0	0	magic
M103	2	26	2	26-Feb	2016		3	28	28	34	174	140	48	3	9	1	M103_26-Feb_2	0.574712644	2.941176471	magic
M103	2	26	2	26-Feb	2016		3	28	28	34	174	140	48	3	10	0	M103_26-Feb_2	0	0	magic
M103	5	26	2	26-Feb	2016		3	28	28	93	182	89	47	2	1	0	M103_26-Feb_5	0	0	magic
M103	5	26	2	26-Feb	2016		3	28	28	93	182	89	47	2	2	18	M103_26-Feb_5	9.89010989	19.35483871	magic
M103	5	26	2	26-Feb	2016		3	28	28	93	182	89	47	2	3	30	M103_26-Feb_5	16.48351648	32.25806452	magic
M103	5	26	2	26-Feb	2016		3	28	28	93	182	89	47	2	4	16	M103_26-Feb_5	8.791208791	17.20430108	magic
M103	5	26	2	26-Feb	2016		3	28	28	93	182	89	47	2	5	20	M103_26-Feb_5	10.98901099	21.50537634	magic
M103	5	26	2	26-Feb	2016		3	28	28	93	182	89	47	2	6	7	M103_26-Feb_5	3.846153846	7.52688172	magic
M103	5	26	2	26-Feb	2016		3	28	28	93	182	89	47	2	7	2	M103_26-Feb_5	1.098901099	2.150537634	magic
M103	5	26	2	26-Feb	2016		3	28	28	93	182	89	47	2	8	0	M103_26-Feb_5	0	0	magic
M103	5	26	2	26-Feb	2016		3	28	28	93	182	89	47	2	9	0	M103_26-Feb_5	0	0	magic
M103	5	26	2	26-Feb	2016		3	28	28	93	182	89	47	2	10	0	M103_26-Feb_5	0	0	magic
M103	6	26	2	26-Feb	2016		3	28	28	93	180	87	46	1	1	0	M103_26-Feb_6	0	0	magic
M103	6	26	2	26-Feb	2016		3	28	28	93	180	87	46	1	2	5	M103_26-Feb_6	2.777777778	5.376344086	magic
M103	6	26	2	26-Feb	2016		3	28	28	93	180	87	46	1	3	27	M103_26-Feb_6	15	29.03225806	magic
M103	6	26	2	26-Feb	2016		3	28	28	93	180	87	46	1	4	15	M103_26-Feb_6	8.333333333	16.12903226	magic
M103	6	26	2	26-Feb	2016		3	28	28	93	180	87	46	1	5	22	M103_26-Feb_6	12.22222222	23.65591398	magic
M103	6	26	2	26-Feb	2016		3	28	28	93	180	87	46	1	6	11	M103_26-Feb_6	6.111111111	11.82795699	magic
M103	6	26	2	26-Feb	2016		3	28	28	93	180	87	46	1	7	8	M103_26-Feb_6	4.444444444	8.602150538	magic
M103	6	26	2	26-Feb	2016		3	28	28	93	180	87	46	1	8	3	M103_26-Feb_6	1.666666667	3.225806452	magic
M103	6	26	2	26-Feb	2016		3	28	28	93	180	87	46	1	9	1	M103_26-Feb_6	0.555555556	1.075268817	magic
M103	6	26	2	26-Feb	2016		3	28	28	93	180	87	46	1	10	1	M103_26-Feb_6	0.555555556	1.075268817	magic
M104	1	4	3	4-Mar	2016		3	28	28	67	176	109	52	4	1	0	M104_04-Mar_1	0	0	magic
M104	1	4	3	4-Mar	2016		3	28	28	67	176	109	52	4	2	0	M104_04-Mar_1	0	0	magic
M104	1	4	3	4-Mar	2016		3	28	28	67	176	109	52	4	3	42	M104_04-Mar_1	23.86363636	62.68656716	magic
M104	1	4	3	4-Mar	2016		3	28	28	67	176	109	52	4	4	14	M104_04-Mar_1	7.954545455	20.89552239	magic
M104	1	4	3	4-Mar	2016		3	28	28	67	176	109	52	4	5	7	M104_04-Mar_1	3.977272727	10.44776119	magic
M104	1	4	3	4-Mar	2016		3	28	28	67	176	109	52	4	6	1	M104_04-Mar_1	0.568181818	1.492537313	magic
M104	1	4	3	4-Mar	2016		3	28	28	67	176	109	52	4	7	3	M104_04-Mar_1	1.704545455	4.47761194	magic
M104	2	4	3	4-Mar	2016		3	28	28	159	162	3	49	1	1	0	M104_04-Mar_2	0	0	magic
M104	2	4	3	4-Mar	2016		3	28	28	159	162	3	49	1	2	29	M104_04-Mar_2	17.90123457	18.23899371	magic
M104	2	4	3	4-Mar	2016		3	28	28	159	162	3	49	1	3	127	M104_04-Mar_2	78.39506173	79.87421384	magic
M104	2	4	3	4-Mar	2016		3	28	28	159	162	3	49	1	4	2	M104_04-Mar_2	1.234567901	1.257861635	magic
M104	2	4	3	4-Mar	2016		3	28	28	159	162	3	49	1	5	1	M104_04-Mar_2	0.617283951	0.628930818	magic
M104	3	4	3	4-Mar	2016		3	28	28	143	163	20	50	2	1	0	M104_04-Mar_3	0	0	magic
M104	3	4	3	4-Mar	2016		3	28	28	143	163	20	50	2	2	3	M104_04-Mar_3	1.840490798	2.097902098	magic
M104	3	4	3	4-Mar	2016		3	28	28	143	163	20	50	2	3	120	M104_04-Mar_3	73.6196319	83.91608392	magic
M104	3	4	3	4-Mar	2016		3	28	28	143	163	20	50	2	4	14	M104_04-Mar_3	8.588957055	9.79020979	magic
M104	3	4	3	4-Mar	2016		3	28	28	143	163	20	50	2	5	4	M104_04-Mar_3	2.45398773	2.797202797	magic
M104	3	4	3	4-Mar	2016		3	28	28	143	163	20	50	2	6	2	M104_04-Mar_3	1.226993865	1.398601399	magic
M104	3	4	3	4-Mar	2016		3	28	28	143	163	20	50	2	7	0	M104_04-Mar_3	0	0	magic
M104	4	4	3	4-Mar	2016		3	28	28	139	165	26	51	3	1	0	M104_04-Mar_4	0	0	magic
M104	4	4	3	4-Mar	2016		3	28	28	139	165	26	51	3	2	9	M104_04-Mar_4	5.454545455	6.474820144	magic
M104	4	4	3	4-Mar	2016		3	28	28	139	165	26	51	3	3	101	M104_04-Mar_4	61.21212121	72.6618705	magic
M104	4	4	3	4-Mar	2016		3	28	28	139	165	26	51	3	4	18	M104_04-Mar_4	10.90909091	12.94964029	magic
M104	4	4	3	4-Mar	2016		3	28	28	139	165	26	51	3	5	10	M104_04-Mar_4	6.060606061	7.194244604	magic
M104	4	4	3	4-Mar	2016		3	28	28	139	165	26	51	3	6	1	M104_04-Mar_4	0.606060606	0.71942446	magic
M104	4	4	3	4-Mar	2016		3	28	28	139	165	26	51	3	7	0	M104_04-Mar_4	0	0	magic
M106	3	14	3	14-Mar	2016		3	34	40	109	161	52	55	3	1	0	M106_14-Mar_3	0	0	magic
M106	3	14	3	14-Mar	2016		3	34	40	109	161	52	55	3	2	2	M106_14-Mar_3	1.242236025	1.834862385	magic
M106	3	14	3	14-Mar	2016		3	34	40	109	161	52	55	3	3	93	M106_14-Mar_3	57.76397516	85.32110092	magic
M106	3	14	3	14-Mar	2016		3	34	40	109	161	52	55	3	4	10	M106_14-Mar_3	6.211180124	9.174311927	magic
M106	3	14	3	14-Mar	2016		3	34	40	109	161	52	55	3	5	4	M106_14-Mar_3	2.48447205	3.669724771	magic
M106	3	14	3	14-Mar	2016		3	34	40	109	161	52	55	3	6	0	M106_14-Mar_3	0	0	magic
M106	3	14	3	14-Mar	2016		3	34	40	109	161	52	55	3	7	0	M106_14-Mar_3	0	0	magic
M106	3	14	3	14-Mar	2016		3	34	40	109	161	52	55	3	8	0	M106_14-Mar_3	0	0	magic
M106	3	14	3	14-Mar	2016		3	34	40	109	161	52	55	3	9	0	M106_14-Mar_3	0	0	magic
M106	3	14	3	14-Mar	2016		3	34	40	109	161	52	55	3	10	0	M106_14-Mar_3	0	0	magic
M106	4	14	3	14-Mar	2016		3	34	40	129	167	38	53	1	1	0	M106_14-Mar_4	0	0	magic
M106	4	14	3	14-Mar	2016		3	34	40	129	167	38	53	1	2	2	M106_14-Mar_4	1.19760479	1.550387597	magic
M106	4	14	3	14-Mar	2016		3	34	40	129	167	38	53	1	3	43	M106_14-Mar_4	25.74850299	33.33333333	magic
M106	4	14	3	14-Mar	2016		3	34	40	129	167	38	53	1	4	28	M106_14-Mar_4	16.76646707	21.70542636	magic
M106	4	14	3	14-Mar	2016		3	34	40	129	167	38	53	1	5	28	M106_14-Mar_4	16.76646707	21.70542636	magic
M106	4	14	3	14-Mar	2016		3	34	40	129	167	38	53	1	6	20	M106_14-Mar_4	11.9760479	15.50387597	magic
M106	4	14	3	14-Mar	2016		3	34	40	129	167	38	53	1	7	4	M106_14-Mar_4	2.395209581	3.100775194	magic
M106	4	14	3	14-Mar	2016		3	34	40	129	167	38	53	1	8	2	M106_14-Mar_4	1.19760479	1.550387597	magic
M106	4	14	3	14-Mar	2016		3	34	40	129	167	38	53	1	9	1	M106_14-Mar_4	0.598802395	0.775193798	magic
M106	4	14	3	14-Mar	2016		3	34	40	129	167	38	53	1	10	1	M106_14-Mar_4	0.598802395	0.775193798	magic
M106	4	31	3	31-Mar	2016		3	45	40	153	179	26	56	4	1	0	M106_31-Mar_4	0	0	magic
M106	4	31	3	31-Mar	2016		3	45	40	153	179	26	56	4	2	27	M106_31-Mar_4	15.08379888	17.64705882	magic
M106	4	31	3	31-Mar	2016		3	45	40	153	179	26	56	4	3	53	M106_31-Mar_4	29.60893855	34.64052288	magic
M106	4	31	3	31-Mar	2016		3	45	40	153	179	26	56	4	4	40	M106_31-Mar_4	22.34636872	26.14379085	magic
M106	4	31	3	31-Mar	2016		3	45	40	153	179	26	56	4	5	18	M106_31-Mar_4	10.05586592	11.76470588	magic
M106	4	31	3	31-Mar	2016		3	45	40	153	179	26	56	4	6	9	M106_31-Mar_4	5.027932961	5.882352941	magic
M106	4	31	3	31-Mar	2016		3	45	40	153	179	26	56	4	7	4	M106_31-Mar_4	2.234636872	2.614379085	magic
M106	4	31	3	31-Mar	2016		3	45	40	153	179	26	56	4	8	2	M106_31-Mar_4	1.117318436	1.307189542	magic
M106	4	31	3	31-Mar	2016		3	45	40	153	179	26	56	4	9	0	M106_31-Mar_4	0	0	magic
M106	4	31	3	31-Mar	2016		3	45	40	153	179	26	56	4	10	0	M106_31-Mar_4	0	0	magic
M106	4	31	3	31-Mar	2016		3	45	40	153	179	26	56	4	11	0	M106_31-Mar_4	0	0	magic
M106	5	31	3	31-Mar	2016		3	45	40	95	152	57	58	6	1	0	M106_31-Mar_5	0	0	magic
M106	5	31	3	31-Mar	2016		3	45	40	95	152	57	58	6	2	6	M106_31-Mar_5	3.947368421	6.315789474	magic
M106	5	31	3	31-Mar	2016		3	45	40	95	152	57	58	6	3	53	M106_31-Mar_5	34.86842105	55.78947368	magic
M106	5	31	3	31-Mar	2016		3	45	40	95	152	57	58	6	4	18	M106_31-Mar_5	11.84210526	18.94736842	magic
M106	5	31	3	31-Mar	2016		3	45	40	95	152	57	58	6	5	7	M106_31-Mar_5	4.605263158	7.368421053	magic
M106	5	31	3	31-Mar	2016		3	45	40	95	152	57	58	6	6	4	M106_31-Mar_5	2.631578947	4.210526316	magic
M106	5	31	3	31-Mar	2016		3	45	40	95	152	57	58	6	7	2	M106_31-Mar_5	1.315789474	2.105263158	magic
M106	5	31	3	31-Mar	2016		3	45	40	95	152	57	58	6	8	0	M106_31-Mar_5	0	0	magic
M106	5	31	3	31-Mar	2016		3	45	40	95	152	57	58	6	9	1	M106_31-Mar_5	0.657894737	1.052631579	magic
M106	5	31	3	31-Mar	2016		3	45	40	95	152	57	58	6	10	1	M106_31-Mar_5	0.657894737	1.052631579	magic
M106	5	31	3	31-Mar	2016		3	45	40	95	152	57	58	6	11	3	M106_31-Mar_5	1.973684211	3.157894737	magic
M106	6	14	3	14-Mar	2016		3	34	40	115	159	44	54	2	1	0	M106_14-Mar_6	0	0	magic
M106	6	14	3	14-Mar	2016		3	34	40	115	159	44	54	2	2	3	M106_14-Mar_6	1.886792453	2.608695652	magic
M106	6	14	3	14-Mar	2016		3	34	40	115	159	44	54	2	3	84	M106_14-Mar_6	52.83018868	73.04347826	magic
M106	6	14	3	14-Mar	2016		3	34	40	115	159	44	54	2	4	14	M106_14-Mar_6	8.805031447	12.17391304	magic
M106	6	14	3	14-Mar	2016		3	34	40	115	159	44	54	2	5	9	M106_14-Mar_6	5.660377358	7.826086957	magic
M106	6	14	3	14-Mar	2016		3	34	40	115	159	44	54	2	6	3	M106_14-Mar_6	1.886792453	2.608695652	magic
M106	6	14	3	14-Mar	2016		3	34	40	115	159	44	54	2	7	1	M106_14-Mar_6	0.628930818	0.869565217	magic
M106	6	14	3	14-Mar	2016		3	34	40	115	159	44	54	2	8	0	M106_14-Mar_6	0	0	magic
M106	6	14	3	14-Mar	2016		3	34	40	115	159	44	54	2	9	1	M106_14-Mar_6	0.628930818	0.869565217	magic
M106	6	14	3	14-Mar	2016		3	34	40	115	159	44	54	2	10	0	M106_14-Mar_6	0	0	magic
M106	6	31	3	31-Mar	2016		3	45	40	159	185	26	57	5	1	0	M106_31-Mar_6	0	0	magic
M106	6	31	3	31-Mar	2016		3	45	40	159	185	26	57	5	2	45	M106_31-Mar_6	24.32432432	28.30188679	magic
M106	6	31	3	31-Mar	2016		3	45	40	159	185	26	57	5	3	75	M106_31-Mar_6	40.54054054	47.16981132	magic
M106	6	31	3	31-Mar	2016		3	45	40	159	185	26	57	5	4	19	M106_31-Mar_6	10.27027027	11.94968553	magic
M106	6	31	3	31-Mar	2016		3	45	40	159	185	26	57	5	5	10	M106_31-Mar_6	5.405405405	6.289308176	magic
M106	6	31	3	31-Mar	2016		3	45	40	159	185	26	57	5	6	5	M106_31-Mar_6	2.702702703	3.144654088	magic
M106	6	31	3	31-Mar	2016		3	45	40	159	185	26	57	5	7	1	M106_31-Mar_6	0.540540541	0.628930818	magic
M106	6	31	3	31-Mar	2016		3	45	40	159	185	26	57	5	8	1	M106_31-Mar_6	0.540540541	0.628930818	magic
M106	6	31	3	31-Mar	2016		3	45	40	159	185	26	57	5	9	1	M106_31-Mar_6	0.540540541	0.628930818	magic
M106	6	31	3	31-Mar	2016		3	45	40	159	185	26	57	5	10	2	M106_31-Mar_6	1.081081081	1.257861635	magic
M106	6	31	3	31-Mar	2016		3	45	40	159	185	26	57	5	11	0	M106_31-Mar_6	0	0	magic
M107	1	31	3	31-Mar	2016		3	45	37	192	198	6	62	4	1	0	M107_31-Mar_1	0	0	magic
M107	1	31	3	31-Mar	2016		3	45	37	192	198	6	62	4	2	5	M107_31-Mar_1	2.525252525	2.604166667	magic
M107	1	31	3	31-Mar	2016		3	45	37	192	198	6	62	4	3	71	M107_31-Mar_1	35.85858586	36.97916667	magic
M107	1	31	3	31-Mar	2016		3	45	37	192	198	6	62	4	4	66	M107_31-Mar_1	33.33333333	34.375	magic
M107	1	31	3	31-Mar	2016		3	45	37	192	198	6	62	4	5	31	M107_31-Mar_1	15.65656566	16.14583333	magic
M107	1	31	3	31-Mar	2016		3	45	37	192	198	6	62	4	6	14	M107_31-Mar_1	7.070707071	7.291666667	magic
M107	1	31	3	31-Mar	2016		3	45	37	192	198	6	62	4	7	4	M107_31-Mar_1	2.02020202	2.083333333	magic
M107	1	31	3	31-Mar	2016		3	45	37	192	198	6	62	4	8	1	M107_31-Mar_1	0.505050505	0.520833333	magic
M107	1	31	3	31-Mar	2016		3	45	37	192	198	6	62	4	9	0	M107_31-Mar_1	0	0	magic
M107	1	31	3	31-Mar	2016		3	45	37	192	198	6	62	4	10	0	M107_31-Mar_1	0	0	magic
M107	1	31	3	31-Mar	2016		3	45	37	192	198	6	62	4	11	0	M107_31-Mar_1	0	0	magic
M107	1	31	3	31-Mar	2016		3	45	37	192	198	6	62	4	12	0	M107_31-Mar_1	0	0	magic
M107	1	31	3	31-Mar	2016		3	45	37	192	198	6	62	4	13	0	M107_31-Mar_1	0	0	magic
M107	1	31	3	31-Mar	2016		3	45	37	192	198	6	62	4	14	0	M107_31-Mar_1	0	0	magic
M107	1	31	3	31-Mar	2016		3	45	37	192	198	6	62	4	15	0	M107_31-Mar_1	0	0	magic
M107	2	26	2	26-Feb	2016		3	32	37	177	205	28	61	3	1	0	M107_26-Feb_2	0	0	magic
M107	2	26	2	26-Feb	2016		3	32	37	177	205	28	61	3	2	0	M107_26-Feb_2	0	0	magic
M107	2	26	2	26-Feb	2016		3	32	37	177	205	28	61	3	3	17	M107_26-Feb_2	8.292682927	9.604519774	magic
M107	2	26	2	26-Feb	2016		3	32	37	177	205	28	61	3	4	42	M107_26-Feb_2	20.48780488	23.72881356	magic
M107	2	26	2	26-Feb	2016		3	32	37	177	205	28	61	3	5	47	M107_26-Feb_2	22.92682927	26.55367232	magic
M107	2	26	2	26-Feb	2016		3	32	37	177	205	28	61	3	6	51	M107_26-Feb_2	24.87804878	28.81355932	magic
M107	2	26	2	26-Feb	2016		3	32	37	177	205	28	61	3	7	14	M107_26-Feb_2	6.829268293	7.90960452	magic
M107	2	26	2	26-Feb	2016		3	32	37	177	205	28	61	3	8	5	M107_26-Feb_2	2.43902439	2.824858757	magic
M107	2	26	2	26-Feb	2016		3	32	37	177	205	28	61	3	9	0	M107_26-Feb_2	0	0	magic
M107	2	26	2	26-Feb	2016		3	32	37	177	205	28	61	3	10	1	M107_26-Feb_2	0.487804878	0.564971751	magic
M107	2	26	2	26-Feb	2016		3	32	37	177	205	28	61	3	11	0	M107_26-Feb_2	0	0	magic
M107	2	26	2	26-Feb	2016		3	32	37	177	205	28	61	3	12	0	M107_26-Feb_2	0	0	magic
M107	2	26	2	26-Feb	2016		3	32	37	177	205	28	61	3	13	0	M107_26-Feb_2	0	0	magic
M107	2	26	2	26-Feb	2016		3	32	37	177	205	28	61	3	14	0	M107_26-Feb_2	0	0	magic
M107	2	26	2	26-Feb	2016		3	32	37	177	205	28	61	3	15	0	M107_26-Feb_2	0	0	magic
M107	2	26	2	26-Feb	2016		3	32	37	177	205	28	61	3	16	0	M107_26-Feb_2	0	0	magic
M107	2	26	2	26-Feb	2016		3	32	37	177	205	28	61	3	17	0	M107_26-Feb_2	0	0	magic
M107	2	26	2	26-Feb	2016		3	32	37	177	205	28	61	3	18	0	M107_26-Feb_2	0	0	magic
M107	2	26	2	26-Feb	2016		3	32	37	177	205	28	61	3	19	0	M107_26-Feb_2	0	0	magic
M107	2	26	2	26-Feb	2016		3	32	37	177	205	28	61	3	20	0	M107_26-Feb_2	0	0	magic
M107	3	31	3	31-Mar	2016		3	46	37	158	198	40	63	5	1	0	M107_31-Mar_3	0	0	magic
M107	3	31	3	31-Mar	2016		3	46	37	158	198	40	63	5	2	6	M107_31-Mar_3	3.03030303	3.797468354	magic
M107	3	31	3	31-Mar	2016		3	46	37	158	198	40	63	5	3	56	M107_31-Mar_3	28.28282828	35.44303797	magic
M107	3	31	3	31-Mar	2016		3	46	37	158	198	40	63	5	4	49	M107_31-Mar_3	24.74747475	31.01265823	magic
M107	3	31	3	31-Mar	2016		3	46	37	158	198	40	63	5	5	30	M107_31-Mar_3	15.15151515	18.98734177	magic
M107	3	31	3	31-Mar	2016		3	46	37	158	198	40	63	5	6	9	M107_31-Mar_3	4.545454545	5.696202532	magic
M107	3	31	3	31-Mar	2016		3	46	37	158	198	40	63	5	7	1	M107_31-Mar_3	0.505050505	0.632911392	magic
M107	3	31	3	31-Mar	2016		3	46	37	158	198	40	63	5	8	4	M107_31-Mar_3	2.02020202	2.53164557	magic
M107	3	31	3	31-Mar	2016		3	46	37	158	198	40	63	5	9	0	M107_31-Mar_3	0	0	magic
M107	3	31	3	31-Mar	2016		3	46	37	158	198	40	63	5	10	1	M107_31-Mar_3	0.505050505	0.632911392	magic
M107	3	31	3	31-Mar	2016		3	46	37	158	198	40	63	5	11	1	M107_31-Mar_3	0.505050505	0.632911392	magic
M107	3	31	3	31-Mar	2016		3	46	37	158	198	40	63	5	12	0	M107_31-Mar_3	0	0	magic
M107	3	31	3	31-Mar	2016		3	46	37	158	198	40	63	5	13	0	M107_31-Mar_3	0	0	magic
M107	3	31	3	31-Mar	2016		3	46	37	158	198	40	63	5	14	0	M107_31-Mar_3	0	0	magic
M107	3	31	3	31-Mar	2016		3	46	37	158	198	40	63	5	15	1	M107_31-Mar_3	0.505050505	0.632911392	magic
M107	4	26	2	26-Feb	2016		3	28	37	162	164	2	59	1	1	0	M107_26-Feb_4	0	0	magic
M107	4	26	2	26-Feb	2016		3	28	37	162	164	2	59	1	2	17	M107_26-Feb_4	10.36585366	10.49382716	magic
M107	4	26	2	26-Feb	2016		3	28	37	162	164	2	59	1	3	67	M107_26-Feb_4	40.85365854	41.35802469	magic
M107	4	26	2	26-Feb	2016		3	28	37	162	164	2	59	1	4	52	M107_26-Feb_4	31.70731707	32.09876543	magic
M107	4	26	2	26-Feb	2016		3	28	37	162	164	2	59	1	5	24	M107_26-Feb_4	14.63414634	14.81481481	magic
M107	4	26	2	26-Feb	2016		3	28	37	162	164	2	59	1	6	1	M107_26-Feb_4	0.609756098	0.617283951	magic
M107	4	26	2	26-Feb	2016		3	28	37	162	164	2	59	1	7	1	M107_26-Feb_4	0.609756098	0.617283951	magic
M107	4	26	2	26-Feb	2016		3	28	37	162	164	2	59	1	8	0	M107_26-Feb_4	0	0	magic
M107	4	26	2	26-Feb	2016		3	28	37	162	164	2	59	1	9	0	M107_26-Feb_4	0	0	magic
M107	4	26	2	26-Feb	2016		3	28	37	162	164	2	59	1	10	0	M107_26-Feb_4	0	0	magic
M107	4	26	2	26-Feb	2016		3	28	37	162	164	2	59	1	11	0	M107_26-Feb_4	0	0	magic
M107	4	26	2	26-Feb	2016		3	28	37	162	164	2	59	1	12	0	M107_26-Feb_4	0	0	magic
M107	4	26	2	26-Feb	2016		3	28	37	162	164	2	59	1	13	0	M107_26-Feb_4	0	0	magic
M107	4	26	2	26-Feb	2016		3	28	37	162	164	2	59	1	14	0	M107_26-Feb_4	0	0	magic
M107	4	26	2	26-Feb	2016		3	28	37	162	164	2	59	1	15	0	M107_26-Feb_4	0	0	magic
M107	4	26	2	26-Feb	2016		3	28	37	162	164	2	59	1	16	0	M107_26-Feb_4	0	0	magic
M107	4	26	2	26-Feb	2016		3	28	37	162	164	2	59	1	17	0	M107_26-Feb_4	0	0	magic
M107	4	26	2	26-Feb	2016		3	28	37	162	164	2	59	1	18	0	M107_26-Feb_4	0	0	magic
M107	4	26	2	26-Feb	2016		3	28	37	162	164	2	59	1	19	0	M107_26-Feb_4	0	0	magic
M107	4	26	2	26-Feb	2016		3	28	37	162	164	2	59	1	20	0	M107_26-Feb_4	0	0	magic
M107	5	26	2	26-Feb	2016		3	35	37	199	210	11	60	2	1	0	M107_26-Feb_5	0	0	magic
M107	5	26	2	26-Feb	2016		3	35	37	199	210	11	60	2	2	3	M107_26-Feb_5	1.428571429	1.507537688	magic
M107	5	26	2	26-Feb	2016		3	35	37	199	210	11	60	2	3	51	M107_26-Feb_5	24.28571429	25.6281407	magic
M107	5	26	2	26-Feb	2016		3	35	37	199	210	11	60	2	4	73	M107_26-Feb_5	34.76190476	36.68341709	magic
M107	5	26	2	26-Feb	2016		3	35	37	199	210	11	60	2	5	38	M107_26-Feb_5	18.0952381	19.09547739	magic
M107	5	26	2	26-Feb	2016		3	35	37	199	210	11	60	2	6	26	M107_26-Feb_5	12.38095238	13.06532663	magic
M107	5	26	2	26-Feb	2016		3	35	37	199	210	11	60	2	7	4	M107_26-Feb_5	1.904761905	2.010050251	magic
M107	5	26	2	26-Feb	2016		3	35	37	199	210	11	60	2	8	2	M107_26-Feb_5	0.952380952	1.005025126	magic
M107	5	26	2	26-Feb	2016		3	35	37	199	210	11	60	2	9	0	M107_26-Feb_5	0	0	magic
M107	5	26	2	26-Feb	2016		3	35	37	199	210	11	60	2	10	0	M107_26-Feb_5	0	0	magic
M107	5	26	2	26-Feb	2016		3	35	37	199	210	11	60	2	11	0	M107_26-Feb_5	0	0	magic
M107	5	26	2	26-Feb	2016		3	35	37	199	210	11	60	2	12	0	M107_26-Feb_5	0	0	magic
M107	5	26	2	26-Feb	2016		3	35	37	199	210	11	60	2	13	0	M107_26-Feb_5	0	0	magic
M107	5	26	2	26-Feb	2016		3	35	37	199	210	11	60	2	14	0	M107_26-Feb_5	0	0	magic
M107	5	26	2	26-Feb	2016		3	35	37	199	210	11	60	2	15	0	M107_26-Feb_5	0	0	magic
M107	5	26	2	26-Feb	2016		3	35	37	199	210	11	60	2	16	0	M107_26-Feb_5	0	0	magic
M107	5	26	2	26-Feb	2016		3	35	37	199	210	11	60	2	17	0	M107_26-Feb_5	0	0	magic
M107	5	26	2	26-Feb	2016		3	35	37	199	210	11	60	2	18	0	M107_26-Feb_5	0	0	magic
M107	5	26	2	26-Feb	2016		3	35	37	199	210	11	60	2	19	0	M107_26-Feb_5	0	0	magic
M107	5	26	2	26-Feb	2016		3	35	37	199	210	11	60	2	20	2	M107_26-Feb_5	0.952380952	1.005025126	magic
M108	1	4	3	4-Mar	2016		3	28	28	156	156	0	64	1	1	0	M108_04-Mar_1	0	0	magic
M108	1	4	3	4-Mar	2016		3	28	28	156	156	0	64	1	2	0	M108_04-Mar_1	0	0	magic
M108	1	4	3	4-Mar	2016		3	28	28	156	156	0	64	1	3	142	M108_04-Mar_1	91.02564103	91.02564103	magic
M108	1	4	3	4-Mar	2016		3	28	28	156	156	0	64	1	4	13	M108_04-Mar_1	8.333333333	8.333333333	magic
M108	1	4	3	4-Mar	2016		3	28	28	156	156	0	64	1	5	1	M108_04-Mar_1	0.641025641	0.641025641	magic
M108	2	4	3	4-Mar	2016		3	28	28	159	160	1	65	2	1	0	M108_04-Mar_2	0	0	magic
M108	2	4	3	4-Mar	2016		3	28	28	159	160	1	65	2	2	0	M108_04-Mar_2	0	0	magic
M108	2	4	3	4-Mar	2016		3	28	28	159	160	1	65	2	3	152	M108_04-Mar_2	95	95.59748428	magic
M108	2	4	3	4-Mar	2016		3	28	28	159	160	1	65	2	4	7	M108_04-Mar_2	4.375	4.402515723	magic
M108	2	4	3	4-Mar	2016		3	28	28	159	160	1	65	2	5	0	M108_04-Mar_2	0	0	magic
M108	4	4	3	4-Mar	2016		3	28	28	160	161	1	66	3	1	0	M108_04-Mar_4	0	0	magic
M108	4	4	3	4-Mar	2016		3	28	28	160	161	1	66	3	2	1	M108_04-Mar_4	0.621118012	0.625	magic
M108	4	4	3	4-Mar	2016		3	28	28	160	161	1	66	3	3	142	M108_04-Mar_4	88.19875776	88.75	magic
M108	4	4	3	4-Mar	2016		3	28	28	160	161	1	66	3	4	16	M108_04-Mar_4	9.937888199	10	magic
M108	4	4	3	4-Mar	2016		3	28	28	160	161	1	66	3	5	1	M108_04-Mar_4	0.621118012	0.625	magic
M108	5	4	3	4-Mar	2016		3	28	28	175	176	1	67	4	1	0	M108_04-Mar_5	0	0	magic
M108	5	4	3	4-Mar	2016		3	28	28	175	176	1	67	4	2	7	M108_04-Mar_5	3.977272727	4	magic
M108	5	4	3	4-Mar	2016		3	28	28	175	176	1	67	4	3	164	M108_04-Mar_5	93.18181818	93.71428571	magic
M108	5	4	3	4-Mar	2016		3	28	28	175	176	1	67	4	4	4	M108_04-Mar_5	2.272727273	2.285714286	magic
M108	5	4	3	4-Mar	2016		3	28	28	175	176	1	67	4	5	0	M108_04-Mar_5	0	0	magic
M109	1b	30	3	30-Mar	2016		4	37	37	158	224	66	70	3	1	0	M109_30-Mar_1b	0	0	magic
M109	1b	30	3	30-Mar	2016		4	37	37	158	224	66	70	3	2	0	M109_30-Mar_1b	0	0	magic
M109	1b	30	3	30-Mar	2016		4	37	37	158	224	66	70	3	3	49	M109_30-Mar_1b	21.875	31.01265823	magic
M109	1b	30	3	30-Mar	2016		4	37	37	158	224	66	70	3	4	58	M109_30-Mar_1b	25.89285714	36.70886076	magic
M109	1b	30	3	30-Mar	2016		4	37	37	158	224	66	70	3	5	22	M109_30-Mar_1b	9.821428571	13.92405063	magic
M109	1b	30	3	30-Mar	2016		4	37	37	158	224	66	70	3	6	21	M109_30-Mar_1b	9.375	13.29113924	magic
M109	1b	30	3	30-Mar	2016		4	37	37	158	224	66	70	3	7	8	M109_30-Mar_1b	3.571428571	5.063291139	magic
M109	1b	30	3	30-Mar	2016		4	37	37	158	224	66	70	3	8	0	M109_30-Mar_1b	0	0	magic
M109	2b	30	3	30-Mar	2016		4	37	37	167	191	24	68	1	1	0	M109_30-Mar_2b	0	0	magic
M109	2b	30	3	30-Mar	2016		4	37	37	167	191	24	68	1	2	0	M109_30-Mar_2b	0	0	magic
M109	2b	30	3	30-Mar	2016		4	37	37	167	191	24	68	1	3	108	M109_30-Mar_2b	56.54450262	64.67065868	magic
M109	2b	30	3	30-Mar	2016		4	37	37	167	191	24	68	1	4	28	M109_30-Mar_2b	14.65968586	16.76646707	magic
M109	2b	30	3	30-Mar	2016		4	37	37	167	191	24	68	1	5	15	M109_30-Mar_2b	7.853403141	8.982035928	magic
M109	2b	30	3	30-Mar	2016		4	37	37	167	191	24	68	1	6	8	M109_30-Mar_2b	4.188481675	4.790419162	magic
M109	2b	30	3	30-Mar	2016		4	37	37	167	191	24	68	1	7	5	M109_30-Mar_2b	2.617801047	2.994011976	magic
M109	2b	30	3	30-Mar	2016		4	37	37	167	191	24	68	1	8	3	M109_30-Mar_2b	1.570680628	1.796407186	magic
M109	3b	30	3	30-Mar	2016		4	37	37	166	190	24	69	2	1	0	M109_30-Mar_3b	0	0	magic
M109	3b	30	3	30-Mar	2016		4	37	37	166	190	24	69	2	2	0	M109_30-Mar_3b	0	0	magic
M109	3b	30	3	30-Mar	2016		4	37	37	166	190	24	69	2	3	108	M109_30-Mar_3b	56.84210526	65.06024096	magic
M109	3b	30	3	30-Mar	2016		4	37	37	166	190	24	69	2	4	31	M109_30-Mar_3b	16.31578947	18.6746988	magic
M109	3b	30	3	30-Mar	2016		4	37	37	166	190	24	69	2	5	9	M109_30-Mar_3b	4.736842105	5.421686747	magic
M109	3b	30	3	30-Mar	2016		4	37	37	166	190	24	69	2	6	13	M109_30-Mar_3b	6.842105263	7.831325301	magic
M109	3b	30	3	30-Mar	2016		4	37	37	166	190	24	69	2	7	4	M109_30-Mar_3b	2.105263158	2.409638554	magic
M109	3b	30	3	30-Mar	2016		4	37	37	166	190	24	69	2	8	1	M109_30-Mar_3b	0.526315789	0.602409639	magic
M11	1	2	12	2-Dec	2015		2	27	27	114	115	1	106	1	1	0	M11_02-Dec_1	0	0	magic
M11	1	2	12	2-Dec	2015		2	27	27	114	115	1	106	1	2	70	M11_02-Dec_1	60.86956522	61.40350877	magic
M11	1	2	12	2-Dec	2015		2	27	27	114	115	1	106	1	3	40	M11_02-Dec_1	34.7826087	35.0877193	magic
M11	1	2	12	2-Dec	2015		2	27	27	114	115	1	106	1	4	4	M11_02-Dec_1	3.47826087	3.50877193	magic
M11	1	2	12	2-Dec	2015		2	27	27	114	115	1	106	1	5	0	M11_02-Dec_1	0	0	magic
M11	1	11	11	11-Nov	2016	4/1/2017	13	29	29	64	136	72	105	3	1	0	M11_11-Nov_1	0	0	magic
M11	1	11	11	11-Nov	2016	4/1/2017	13	29	29	64	136	72	105	3	2	11	M11_11-Nov_1	8.088235294	17.1875	magic
M11	1	11	11	11-Nov	2016	4/1/2017	13	29	29	64	136	72	105	3	3	27	M11_11-Nov_1	19.85294118	42.1875	magic
M11	1	11	11	11-Nov	2016	4/1/2017	13	29	29	64	136	72	105	3	4	23	M11_11-Nov_1	16.91176471	35.9375	magic
M11	1	11	11	11-Nov	2016	4/1/2017	13	29	29	64	136	72	105	3	5	3	M11_11-Nov_1	2.205882353	4.6875	magic
M11	1	23	9	23-Sep	2016	18/10/2016		32	32	173	173	0	97	2	1	0	M11_23-Sep_1	0	0	magic
M11	1	23	9	23-Sep	2016	18/10/2016		32	32	173	173	0	97	2	2	55	M11_23-Sep_1	31.79190751	31.79190751	magic
M11	1	23	9	23-Sep	2016	18/10/2016		32	32	173	173	0	97	2	3	115	M11_23-Sep_1	66.47398844	66.47398844	magic
M11	1	23	9	23-Sep	2016	18/10/2016		32	32	173	173	0	97	2	4	3	M11_23-Sep_1	1.734104046	1.734104046	magic
M11	1A	4	1	4-Jan	2016		1b	31	31	107	111	4	72	2	1	0	M11_04-Jan_1A	0	0	magic
M11	1A	4	1	4-Jan	2016		1b	31	31	107	111	4	72	2	2	60	M11_04-Jan_1A	54.05405405	56.07476636	magic
M11	1A	4	1	4-Jan	2016		1b	31	31	107	111	4	72	2	3	43	M11_04-Jan_1A	38.73873874	40.18691589	magic
M11	1A	4	1	4-Jan	2016		1b	31	31	107	111	4	72	2	4	4	M11_04-Jan_1A	3.603603604	3.738317757	magic
M11	1A	4	1	4-Jan	2016		1b	31	31	107	111	4	72	2	5	0	M11_04-Jan_1A	0	0	magic
M11	1A	4	1	4-Jan	2016		1b	31	31	107	111	4	72	2	6	0	M11_04-Jan_1A	0	0	magic
M11	1B	26	8	26-Aug	2015		1	23	23	17	116	99	80	2	1	0	M11_26-Aug_1B	0	0	magic
M11	1B	26	8	26-Aug	2015		1	23	23	17	116	99	80	2	2	0	M11_26-Aug_1B	0	0	magic
M11	1B	26	8	26-Aug	2015		1	23	23	17	116	99	80	2	3	11	M11_26-Aug_1B	9.482758621	64.70588235	magic
M11	1B	26	8	26-Aug	2015		1	23	23	17	116	99	80	2	4	5	M11_26-Aug_1B	4.310344828	29.41176471	magic
M11	1B	26	8	26-Aug	2015		1	23	23	17	116	99	80	2	5	1	M11_26-Aug_1B	0.862068966	5.882352941	magic
M11	1B	4	1	4-Jan	2016		1b	31	31	108	110	2	71	1	1	0	M11_04-Jan_1B	0	0	magic
M11	1B	4	1	4-Jan	2016		1b	31	31	108	110	2	71	1	2	67	M11_04-Jan_1B	60.90909091	62.03703704	magic
M11	1B	4	1	4-Jan	2016		1b	31	31	108	110	2	71	1	3	40	M11_04-Jan_1B	36.36363636	37.03703704	magic
M11	1B	4	1	4-Jan	2016		1b	31	31	108	110	2	71	1	4	1	M11_04-Jan_1B	0.909090909	0.925925926	magic
M11	1B	4	1	4-Jan	2016		1b	31	31	108	110	2	71	1	5	0	M11_04-Jan_1B	0	0	magic
M11	1B	4	1	4-Jan	2016		1b	31	31	108	110	2	71	1	6	0	M11_04-Jan_1B	0	0	magic
M11	1B	7	9	7-Sep	2015		1	35	35	20	122	102	84	1	1	0	M11_07-Sep_1B	0	0	magic
M11	1B	7	9	7-Sep	2015		1	35	35	20	122	102	84	1	2	1	M11_07-Sep_1B	0.819672131	5	magic
M11	1B	7	9	7-Sep	2015		1	35	35	20	122	102	84	1	3	12	M11_07-Sep_1B	9.836065574	60	magic
M11	1B	7	9	7-Sep	2015		1	35	35	20	122	102	84	1	4	6	M11_07-Sep_1B	4.918032787	30	magic
M11	1B	7	9	7-Sep	2015		1	35	35	20	122	102	84	1	5	1	M11_07-Sep_1B	0.819672131	5	magic
M11	2	11	11	11-Nov	2016	4/1/2017	13	29	29	106	144	38	103	1	1	0	M11_11-Nov_2	0	0	magic
M11	2	11	11	11-Nov	2016	4/1/2017	13	29	29	106	144	38	103	1	2	6	M11_11-Nov_2	4.166666667	5.660377358	magic
M11	2	11	11	11-Nov	2016	4/1/2017	13	29	29	106	144	38	103	1	3	80	M11_11-Nov_2	55.55555556	75.47169811	magic
M11	2	11	11	11-Nov	2016	4/1/2017	13	29	29	106	144	38	103	1	4	19	M11_11-Nov_2	13.19444444	17.9245283	magic
M11	2	11	11	11-Nov	2016	4/1/2017	13	29	29	106	144	38	103	1	5	1	M11_11-Nov_2	0.694444444	0.943396226	magic
M11	2	23	9	23-Sep	2016	18/10/2016		32	32	159	160	1	98	3	1	0	M11_23-Sep_2	0	0	magic
M11	2	23	9	23-Sep	2016	18/10/2016		32	32	159	160	1	98	3	2	83	M11_23-Sep_2	51.875	52.20125786	magic
M11	2	23	9	23-Sep	2016	18/10/2016		32	32	159	160	1	98	3	3	75	M11_23-Sep_2	46.875	47.16981132	magic
M11	2	23	9	23-Sep	2016	18/10/2016		32	32	159	160	1	98	3	4	1	M11_23-Sep_2	0.625	0.628930818	magic
M11	2A	4	1	4-Jan	2016		1b	31	31	109	113	4	73	3	1	0	M11_04-Jan_2A	0	0	magic
M11	2A	4	1	4-Jan	2016		1b	31	31	109	113	4	73	3	2	76	M11_04-Jan_2A	67.25663717	69.72477064	magic
M11	2A	4	1	4-Jan	2016		1b	31	31	109	113	4	73	3	3	30	M11_04-Jan_2A	26.54867257	27.52293578	magic
M11	2A	4	1	4-Jan	2016		1b	31	31	109	113	4	73	3	4	3	M11_04-Jan_2A	2.654867257	2.752293578	magic
M11	2A	4	1	4-Jan	2016		1b	31	31	109	113	4	73	3	5	0	M11_04-Jan_2A	0	0	magic
M11	2A	4	1	4-Jan	2016		1b	31	31	109	113	4	73	3	6	0	M11_04-Jan_2A	0	0	magic
M11	2B	26	8	26-Aug	2015		1	23	23	18	107	89	79	1	1	0	M11_26-Aug_2B	0	0	magic
M11	2B	26	8	26-Aug	2015		1	23	23	18	107	89	79	1	2	0	M11_26-Aug_2B	0	0	magic
M11	2B	26	8	26-Aug	2015		1	23	23	18	107	89	79	1	3	15	M11_26-Aug_2B	14.01869159	83.33333333	magic
M11	2B	26	8	26-Aug	2015		1	23	23	18	107	89	79	1	4	3	M11_26-Aug_2B	2.803738318	16.66666667	magic
M11	2B	26	8	26-Aug	2015		1	23	23	18	107	89	79	1	5	0	M11_26-Aug_2B	0	0	magic
M11	2B	7	9	7-Sep	2015		1	35	35	13	123	110	85	2	1	0	M11_07-Sep_2B	0	0	magic
M11	2B	7	9	7-Sep	2015		1	35	35	13	123	110	85	2	2	0	M11_07-Sep_2B	0	0	magic
M11	2B	7	9	7-Sep	2015		1	35	35	13	123	110	85	2	3	6	M11_07-Sep_2B	4.87804878	46.15384615	magic
M11	2B	7	9	7-Sep	2015		1	35	35	13	123	110	85	2	4	7	M11_07-Sep_2B	5.691056911	53.84615385	magic
M11	2B	7	9	7-Sep	2015		1	35	35	13	123	110	85	2	5	0	M11_07-Sep_2B	0	0	magic
M11	3	2	12	2-Dec	2015		2	27	27	97	112	15	109	4	1	0	M11_02-Dec_3	0	0	magic
M11	3	2	12	2-Dec	2015		2	27	27	97	112	15	109	4	2	10	M11_02-Dec_3	8.928571429	10.30927835	magic
M11	3	2	12	2-Dec	2015		2	27	27	97	112	15	109	4	3	68	M11_02-Dec_3	60.71428571	70.10309278	magic
M11	3	2	12	2-Dec	2015		2	27	27	97	112	15	109	4	4	19	M11_02-Dec_3	16.96428571	19.58762887	magic
M11	3	2	12	2-Dec	2015		2	27	27	97	112	15	109	4	5	0	M11_02-Dec_3	0	0	magic
M11	3	11	11	11-Nov	2016	4/1/2017	13	29	29	89	127	38	104	2	1	0	M11_11-Nov_3	0	0	magic
M11	3	11	11	11-Nov	2016	4/1/2017	13	29	29	89	127	38	104	2	2	3	M11_11-Nov_3	2.362204724	3.370786517	magic
M11	3	11	11	11-Nov	2016	4/1/2017	13	29	29	89	127	38	104	2	3	57	M11_11-Nov_3	44.88188976	64.04494382	magic
M11	3	11	11	11-Nov	2016	4/1/2017	13	29	29	89	127	38	104	2	4	21	M11_11-Nov_3	16.53543307	23.59550562	magic
M11	3	11	11	11-Nov	2016	4/1/2017	13	29	29	89	127	38	104	2	5	8	M11_11-Nov_3	6.299212598	8.988764045	magic
M11	3	23	9	23-Sep	2016	18/10/2016		32	32	140	140	0	96	1	1	0	M11_23-Sep_3	0	0	magic
M11	3	23	9	23-Sep	2016	18/10/2016		32	32	140	140	0	96	1	2	76	M11_23-Sep_3	54.28571429	54.28571429	magic
M11	3	23	9	23-Sep	2016	18/10/2016		32	32	140	140	0	96	1	3	57	M11_23-Sep_3	40.71428571	40.71428571	magic
M11	3	23	9	23-Sep	2016	18/10/2016		32	32	140	140	0	96	1	4	7	M11_23-Sep_3	5	5	magic
M11	3A	4	1	4-Jan	2016		1b	31	31	115	119	4	74	4	1	0	M11_04-Jan_3A	0	0	magic
M11	3A	4	1	4-Jan	2016		1b	31	31	115	119	4	74	4	2	57	M11_04-Jan_3A	47.89915966	49.56521739	magic
M11	3A	4	1	4-Jan	2016		1b	31	31	115	119	4	74	4	3	48	M11_04-Jan_3A	40.33613445	41.73913043	magic
M11	3A	4	1	4-Jan	2016		1b	31	31	115	119	4	74	4	4	8	M11_04-Jan_3A	6.722689076	6.956521739	magic
M11	3A	4	1	4-Jan	2016		1b	31	31	115	119	4	74	4	5	2	M11_04-Jan_3A	1.680672269	1.739130435	magic
M11	3A	4	1	4-Jan	2016		1b	31	31	115	119	4	74	4	6	0	M11_04-Jan_3A	0	0	magic
M11	3B	26	8	26-Aug	2015		1	23	23	5	111	106	81	3	1	0	M11_26-Aug_3B	0	0	magic
M11	3B	26	8	26-Aug	2015		1	23	23	5	111	106	81	3	2	0	M11_26-Aug_3B	0	0	magic
M11	3B	26	8	26-Aug	2015		1	23	23	5	111	106	81	3	3	1	M11_26-Aug_3B	0.900900901	20	magic
M11	3B	26	8	26-Aug	2015		1	23	23	5	111	106	81	3	4	3	M11_26-Aug_3B	2.702702703	60	magic
M11	3B	26	8	26-Aug	2015		1	23	23	5	111	106	81	3	5	1	M11_26-Aug_3B	0.900900901	20	magic
M11	3B	7	9	7-Sep	2015		1	35	35	7	126	119	86	3	1	0	M11_07-Sep_3B	0	0	magic
M11	3B	7	9	7-Sep	2015		1	35	35	7	126	119	86	3	2	1	M11_07-Sep_3B	0.793650794	14.28571429	magic
M11	3B	7	9	7-Sep	2015		1	35	35	7	126	119	86	3	3	5	M11_07-Sep_3B	3.968253968	71.42857143	magic
M11	3B	7	9	7-Sep	2015		1	35	35	7	126	119	86	3	4	0	M11_07-Sep_3B	0	0	magic
M11	3B	7	9	7-Sep	2015		1	35	35	7	126	119	86	3	5	1	M11_07-Sep_3B	0.793650794	14.28571429	magic
M11	4	2	12	2-Dec	2015		2	27	27	108	113	5	107	2	1	0	M11_02-Dec_4	0	0	magic
M11	4	2	12	2-Dec	2015		2	27	27	108	113	5	107	2	2	31	M11_02-Dec_4	27.43362832	28.7037037	magic
M11	4	2	12	2-Dec	2015		2	27	27	108	113	5	107	2	3	71	M11_02-Dec_4	62.83185841	65.74074074	magic
M11	4	2	12	2-Dec	2015		2	27	27	108	113	5	107	2	4	3	M11_02-Dec_4	2.654867257	2.777777778	magic
M11	4	2	12	2-Dec	2015		2	27	27	108	113	5	107	2	5	3	M11_02-Dec_4	2.654867257	2.777777778	magic
M11	5	2	12	2-Dec	2015		2	27	27	107	114	7	108	3	1	0	M11_02-Dec_5	0	0	magic
M11	5	2	12	2-Dec	2015		2	27	27	107	114	7	108	3	2	48	M11_02-Dec_5	42.10526316	44.85981308	magic
M11	5	2	12	2-Dec	2015		2	27	27	107	114	7	108	3	3	54	M11_02-Dec_5	47.36842105	50.46728972	magic
M11	5	2	12	2-Dec	2015		2	27	27	107	114	7	108	3	4	4	M11_02-Dec_5	3.50877193	3.738317757	magic
M11	5	2	12	2-Dec	2015		2	27	27	107	114	7	108	3	5	1	M11_02-Dec_5	0.877192982	0.934579439	magic
M111	1A	22	1	22-Jan	2016		1b	32	32	116	119	3	114	2	1	0	M111_22-Jan_1A	0	0	magic
M111	1A	22	1	22-Jan	2016		1b	32	32	116	119	3	114	2	2	22	M111_22-Jan_1A	18.48739496	18.96551724	magic
M111	1A	22	1	22-Jan	2016		1b	32	32	116	119	3	114	2	3	71	M111_22-Jan_1A	59.66386555	61.20689655	magic
M111	1A	22	1	22-Jan	2016		1b	32	32	116	119	3	114	2	4	19	M111_22-Jan_1A	15.96638655	16.37931034	magic
M111	1A	22	1	22-Jan	2016		1b	32	32	116	119	3	114	2	5	4	M111_22-Jan_1A	3.361344538	3.448275862	magic
M111	1A	22	1	22-Jan	2016		1b	32	32	116	119	3	114	2	6	0	M111_22-Jan_1A	0	0	magic
M111	1A	22	1	22-Jan	2016		1b	32	32	116	119	3	114	2	7	0	M111_22-Jan_1A	0	0	magic
M111	1A	4	9	4-Sep	2015		1	22	22	15	121	106	130	3	1	0	M111_04-Sep_1A	0	0	magic
M111	1A	4	9	4-Sep	2015		1	22	22	15	121	106	130	3	2	0	M111_04-Sep_1A	0	0	magic
M111	1A	4	9	4-Sep	2015		1	22	22	15	121	106	130	3	3	0	M111_04-Sep_1A	0	0	magic
M111	1A	4	9	4-Sep	2015		1	22	22	15	121	106	130	3	4	0	M111_04-Sep_1A	0	0	magic
M111	1A	4	9	4-Sep	2015		1	22	22	15	121	106	130	3	5	1	M111_04-Sep_1A	0.826446281	6.666666667	magic
M111	1A	4	9	4-Sep	2015		1	22	22	15	121	106	130	3	6	1	M111_04-Sep_1A	0.826446281	6.666666667	magic
M111	1A	4	9	4-Sep	2015		1	22	22	15	121	106	130	3	7	2	M111_04-Sep_1A	1.652892562	13.33333333	magic
M111	1A	4	9	4-Sep	2015		1	22	22	15	121	106	130	3	8	1	M111_04-Sep_1A	0.826446281	6.666666667	magic
M111	1A	4	9	4-Sep	2015		1	22	22	15	121	106	130	3	9	0	M111_04-Sep_1A	0	0	magic
M111	1A	4	9	4-Sep	2015		1	22	22	15	121	106	130	3	10	2	M111_04-Sep_1A	1.652892562	13.33333333	magic
M111	1A	4	9	4-Sep	2015		1	22	22	15	121	106	130	3	11	1	M111_04-Sep_1A	0.826446281	6.666666667	magic
M111	1A	4	9	4-Sep	2015		1	22	22	15	121	106	130	3	12	0	M111_04-Sep_1A	0	0	magic
M111	1A	4	9	4-Sep	2015		1	22	22	15	121	106	130	3	13	1	M111_04-Sep_1A	0.826446281	6.666666667	magic
M111	1A	4	9	4-Sep	2015		1	22	22	15	121	106	130	3	14	3	M111_04-Sep_1A	2.479338843	20	magic
M111	1A	4	9	4-Sep	2015		1	22	22	15	121	106	130	3	15	3	M111_04-Sep_1A	2.479338843	20	magic
M111	1B	22	1	22-Jan	2016		1b	32	32	117	119	2	113	1	1	0	M111_22-Jan_1B	0	0	magic
M111	1B	22	1	22-Jan	2016		1b	32	32	117	119	2	113	1	2	17	M111_22-Jan_1B	14.28571429	14.52991453	magic
M111	1B	22	1	22-Jan	2016		1b	32	32	117	119	2	113	1	3	71	M111_22-Jan_1B	59.66386555	60.68376068	magic
M111	1B	22	1	22-Jan	2016		1b	32	32	117	119	2	113	1	4	24	M111_22-Jan_1B	20.16806723	20.51282051	magic
M111	1B	22	1	22-Jan	2016		1b	32	32	117	119	2	113	1	5	3	M111_22-Jan_1B	2.521008403	2.564102564	magic
M111	1B	22	1	22-Jan	2016		1b	32	32	117	119	2	113	1	6	2	M111_22-Jan_1B	1.680672269	1.709401709	magic
M111	1B	22	1	22-Jan	2016		1b	32	32	117	119	2	113	1	7	0	M111_22-Jan_1B	0	0	magic
M111	2A	22	1	22-Jan	2016		1b	32	32	72	115	43	116	4	1	0	M111_22-Jan_2A	0	0	magic
M111	2A	22	1	22-Jan	2016		1b	32	32	72	115	43	116	4	2	3	M111_22-Jan_2A	2.608695652	4.166666667	magic
M111	2A	22	1	22-Jan	2016		1b	32	32	72	115	43	116	4	3	25	M111_22-Jan_2A	21.73913043	34.72222222	magic
M111	2A	22	1	22-Jan	2016		1b	32	32	72	115	43	116	4	4	26	M111_22-Jan_2A	22.60869565	36.11111111	magic
M111	2A	22	1	22-Jan	2016		1b	32	32	72	115	43	116	4	5	12	M111_22-Jan_2A	10.43478261	16.66666667	magic
M111	2A	22	1	22-Jan	2016		1b	32	32	72	115	43	116	4	6	6	M111_22-Jan_2A	5.217391304	8.333333333	magic
M111	2A	22	1	22-Jan	2016		1b	32	32	72	115	43	116	4	7	2	M111_22-Jan_2A	1.739130435	2.777777778	magic
M111	3a	14	4	14-Apr	2016		4	31	30	161	162	1	121	1	1	0	M111_14-Apr_3a	0	0	magic
M111	3a	14	4	14-Apr	2016		4	31	30	161	162	1	121	1	2	4	M111_14-Apr_3a	2.469135802	2.48447205	magic
M111	3a	14	4	14-Apr	2016		4	31	30	161	162	1	121	1	3	137	M111_14-Apr_3a	84.56790123	85.0931677	magic
M111	3a	14	4	14-Apr	2016		4	31	30	161	162	1	121	1	4	18	M111_14-Apr_3a	11.11111111	11.18012422	magic
M111	3a	14	4	14-Apr	2016		4	31	30	161	162	1	121	1	5	2	M111_14-Apr_3a	1.234567901	1.242236025	magic
M111	3A	4	9	4-Sep	2015		1	22	22	20	78	58	127	2	1	0	M111_04-Sep_3A	0	0	magic
M111	3A	4	9	4-Sep	2015		1	22	22	20	78	58	127	2	2	0	M111_04-Sep_3A	0	0	magic
M111	3A	4	9	4-Sep	2015		1	22	22	20	78	58	127	2	3	6	M111_04-Sep_3A	7.692307692	30	magic
M111	3A	4	9	4-Sep	2015		1	22	22	20	78	58	127	2	4	7	M111_04-Sep_3A	8.974358974	35	magic
M111	3A	4	9	4-Sep	2015		1	22	22	20	78	58	127	2	5	5	M111_04-Sep_3A	6.41025641	25	magic
M111	3A	4	9	4-Sep	2015		1	22	22	20	78	58	127	2	6	1	M111_04-Sep_3A	1.282051282	5	magic
M111	3A	4	9	4-Sep	2015		1	22	22	20	78	58	127	2	7	1	M111_04-Sep_3A	1.282051282	5	magic
M111	3A	4	9	4-Sep	2015		1	22	22	20	78	58	127	2	8	0	M111_04-Sep_3A	0	0	magic
M111	3A	4	9	4-Sep	2015		1	22	22	20	78	58	127	2	9	0	M111_04-Sep_3A	0	0	magic
M111	3A	4	9	4-Sep	2015		1	22	22	20	78	58	127	2	10	0	M111_04-Sep_3A	0	0	magic
M111	3A	4	9	4-Sep	2015		1	22	22	20	78	58	127	2	11	0	M111_04-Sep_3A	0	0	magic
M111	3A	4	9	4-Sep	2015		1	22	22	20	78	58	127	2	12	0	M111_04-Sep_3A	0	0	magic
M111	3A	4	9	4-Sep	2015		1	22	22	20	78	58	127	2	13	0	M111_04-Sep_3A	0	0	magic
M111	3A	4	9	4-Sep	2015		1	22	22	20	78	58	127	2	14	0	M111_04-Sep_3A	0	0	magic
M111	3A	4	9	4-Sep	2015		1	22	22	20	78	58	127	2	15	0	M111_04-Sep_3A	0	0	magic
M111	3A	22	1	22-Jan	2016		1b	32	32	111	119	8	115	3	1	0	M111_22-Jan_3A	0	0	magic
M111	3A	22	1	22-Jan	2016		1b	32	32	111	119	8	115	3	2	9	M111_22-Jan_3A	7.56302521	8.108108108	magic
M111	3A	22	1	22-Jan	2016		1b	32	32	111	119	8	115	3	3	59	M111_22-Jan_3A	49.57983193	53.15315315	magic
M111	3A	22	1	22-Jan	2016		1b	32	32	111	119	8	115	3	4	30	M111_22-Jan_3A	25.21008403	27.02702703	magic
M111	3A	22	1	22-Jan	2016		1b	32	32	111	119	8	115	3	5	11	M111_22-Jan_3A	9.243697479	9.90990991	magic
M111	3A	22	1	22-Jan	2016		1b	32	32	111	119	8	115	3	6	2	M111_22-Jan_3A	1.680672269	1.801801802	magic
M111	3A	22	1	22-Jan	2016		1b	32	32	111	119	8	115	3	7	2	M111_22-Jan_3A	1.680672269	1.801801802	magic
M111	3b	14	4	14-Apr	2016		4	28	30	171	237	66	122	2	1	0	M111_14-Apr_3b	0	0	magic
M111	3b	14	4	14-Apr	2016		4	28	30	171	237	66	122	2	2	0	M111_14-Apr_3b	0	0	magic
M111	3b	14	4	14-Apr	2016		4	28	30	171	237	66	122	2	3	157	M111_14-Apr_3b	66.24472574	91.8128655	magic
M111	3b	14	4	14-Apr	2016		4	28	30	171	237	66	122	2	4	14	M111_14-Apr_3b	5.907172996	8.187134503	magic
M111	3b	14	4	14-Apr	2016		4	28	30	171	237	66	122	2	5	0	M111_14-Apr_3b	0	0	magic
M111	4A	4	9	4-Sep	2015		1	22	22	39	91	52	126	1	1	0	M111_04-Sep_4A	0	0	magic
M111	4A	4	9	4-Sep	2015		1	22	22	39	91	52	126	1	2	0	M111_04-Sep_4A	0	0	magic
M111	4A	4	9	4-Sep	2015		1	22	22	39	91	52	126	1	3	9	M111_04-Sep_4A	9.89010989	23.07692308	magic
M111	4A	4	9	4-Sep	2015		1	22	22	39	91	52	126	1	4	13	M111_04-Sep_4A	14.28571429	33.33333333	magic
M111	4A	4	9	4-Sep	2015		1	22	22	39	91	52	126	1	5	8	M111_04-Sep_4A	8.791208791	20.51282051	magic
M111	4A	4	9	4-Sep	2015		1	22	22	39	91	52	126	1	6	8	M111_04-Sep_4A	8.791208791	20.51282051	magic
M111	4A	4	9	4-Sep	2015		1	22	22	39	91	52	126	1	7	0	M111_04-Sep_4A	0	0	magic
M111	4A	4	9	4-Sep	2015		1	22	22	39	91	52	126	1	8	0	M111_04-Sep_4A	0	0	magic
M111	4A	4	9	4-Sep	2015		1	22	22	39	91	52	126	1	9	0	M111_04-Sep_4A	0	0	magic
M111	4A	4	9	4-Sep	2015		1	22	22	39	91	52	126	1	10	1	M111_04-Sep_4A	1.098901099	2.564102564	magic
M111	4A	4	9	4-Sep	2015		1	22	22	39	91	52	126	1	11	0	M111_04-Sep_4A	0	0	magic
M111	4A	4	9	4-Sep	2015		1	22	22	39	91	52	126	1	12	0	M111_04-Sep_4A	0	0	magic
M111	4A	4	9	4-Sep	2015		1	22	22	39	91	52	126	1	13	0	M111_04-Sep_4A	0	0	magic
M111	4A	4	9	4-Sep	2015		1	22	22	39	91	52	126	1	14	0	M111_04-Sep_4A	0	0	magic
M111	4A	4	9	4-Sep	2015		1	22	22	39	91	52	126	1	15	0	M111_04-Sep_4A	0	0	magic
M112	1a	14	3	14-Mar	2016		4	24	24	107	176	69	144	3	1	0	M112_14-Mar_1a	0	0	magic
M112	1a	14	3	14-Mar	2016		4	24	24	107	176	69	144	3	2	0	M112_14-Mar_1a	0	0	magic
M112	1a	14	3	14-Mar	2016		4	24	24	107	176	69	144	3	3	11	M112_14-Mar_1a	6.25	10.28037383	magic
M112	1a	14	3	14-Mar	2016		4	24	24	107	176	69	144	3	4	29	M112_14-Mar_1a	16.47727273	27.10280374	magic
M112	1a	14	3	14-Mar	2016		4	24	24	107	176	69	144	3	5	39	M112_14-Mar_1a	22.15909091	36.44859813	magic
M112	1a	14	3	14-Mar	2016		4	24	24	107	176	69	144	3	6	0	M112_14-Mar_1a	0	0	magic
M112	1a	14	3	14-Mar	2016		4	24	24	107	176	69	144	3	7	26	M112_14-Mar_1a	14.77272727	24.29906542	magic
M112	1a	14	3	14-Mar	2016		4	24	24	107	176	69	144	3	8	2	M112_14-Mar_1a	1.136363636	1.869158879	magic
M112	1a	14	3	14-Mar	2016		4	24	24	107	176	69	144	3	9	0	M112_14-Mar_1a	0	0	magic
M112	1a	14	3	14-Mar	2016		4	24	24	107	176	69	144	3	10	0	M112_14-Mar_1a	0	0	magic
M112	2a	14	3	14-Mar	2016		4	24	24	165	169	4	142	1	1	0	M112_14-Mar_2a	0	0	magic
M112	2a	14	3	14-Mar	2016		4	24	24	165	169	4	142	1	2	0	M112_14-Mar_2a	0	0	magic
M112	2a	14	3	14-Mar	2016		4	24	24	165	169	4	142	1	3	71	M112_14-Mar_2a	42.01183432	43.03030303	magic
M112	2a	14	3	14-Mar	2016		4	24	24	165	169	4	142	1	4	72	M112_14-Mar_2a	42.6035503	43.63636364	magic
M112	2a	14	3	14-Mar	2016		4	24	24	165	169	4	142	1	5	21	M112_14-Mar_2a	12.4260355	12.72727273	magic
M112	2a	14	3	14-Mar	2016		4	24	24	165	169	4	142	1	6	1	M112_14-Mar_2a	0.591715976	0.606060606	magic
M112	2a	14	3	14-Mar	2016		4	24	24	165	169	4	142	1	7	0	M112_14-Mar_2a	0	0	magic
M112	2a	14	3	14-Mar	2016		4	24	24	165	169	4	142	1	8	0	M112_14-Mar_2a	0	0	magic
M112	2a	14	3	14-Mar	2016		4	24	24	165	169	4	142	1	9	0	M112_14-Mar_2a	0	0	magic
M112	2a	14	3	14-Mar	2016		4	24	24	165	169	4	142	1	10	0	M112_14-Mar_2a	0	0	magic
M112	3b	14	3	14-Mar	2016		4	24	24	145	167	22	143	2	1	0	M112_14-Mar_3b	0	0	magic
M112	3b	14	3	14-Mar	2016		4	24	24	145	167	22	143	2	2	0	M112_14-Mar_3b	0	0	magic
M112	3b	14	3	14-Mar	2016		4	24	24	145	167	22	143	2	3	35	M112_14-Mar_3b	20.95808383	24.13793103	magic
M112	3b	14	3	14-Mar	2016		4	24	24	145	167	22	143	2	4	70	M112_14-Mar_3b	41.91616766	48.27586207	magic
M112	3b	14	3	14-Mar	2016		4	24	24	145	167	22	143	2	5	24	M112_14-Mar_3b	14.37125749	16.55172414	magic
M112	3b	14	3	14-Mar	2016		4	24	24	145	167	22	143	2	6	7	M112_14-Mar_3b	4.191616766	4.827586207	magic
M112	3b	14	3	14-Mar	2016		4	24	24	145	167	22	143	2	7	4	M112_14-Mar_3b	2.395209581	2.75862069	magic
M112	3b	14	3	14-Mar	2016		4	24	24	145	167	22	143	2	8	1	M112_14-Mar_3b	0.598802395	0.689655172	magic
M112	3b	14	3	14-Mar	2016		4	24	24	145	167	22	143	2	9	0	M112_14-Mar_3b	0	0	magic
M112	3b	14	3	14-Mar	2016		4	24	24	145	167	22	143	2	10	4	M112_14-Mar_3b	2.395209581	2.75862069	magic
M113	1a	10	3	10-Mar	2016		4	31	27	138	153	15	147	3	1	0	M113_10-Mar_1a	0	0	magic
M113	1a	10	3	10-Mar	2016		4	31	27	138	153	15	147	3	2	1	M113_10-Mar_1a	0.653594771	0.724637681	magic
M113	1a	10	3	10-Mar	2016		4	31	27	138	153	15	147	3	3	94	M113_10-Mar_1a	61.4379085	68.11594203	magic
M113	1a	10	3	10-Mar	2016		4	31	27	138	153	15	147	3	4	40	M113_10-Mar_1a	26.14379085	28.98550725	magic
M113	1a	10	3	10-Mar	2016		4	31	27	138	153	15	147	3	5	3	M113_10-Mar_1a	1.960784314	2.173913043	magic
M113	1a	10	3	10-Mar	2016		4	31	27	138	153	15	147	3	6	0	M113_10-Mar_1a	0	0	magic
M113	1a	10	3	10-Mar	2016		4	31	27	138	153	15	147	3	7	0	M113_10-Mar_1a	0	0	magic
M113	1a	10	3	10-Mar	2016		4	31	27	138	153	15	147	3	8	0	M113_10-Mar_1a	0	0	magic
M113	1a	10	3	10-Mar	2016		4	31	27	138	153	15	147	3	9	0	M113_10-Mar_1a	0	0	magic
M113	1a	10	3	10-Mar	2016		4	31	27	138	153	15	147	3	10	0	M113_10-Mar_1a	0	0	magic
M113	1a	10	3	10-Mar	2016		4	31	27	138	153	15	147	3	11	0	M113_10-Mar_1a	0	0	magic
M113	1b	10	3	10-Mar	2016		4	24	27	151	163	12	146	2	1	0	M113_10-Mar_1b	0	0	magic
M113	1b	10	3	10-Mar	2016		4	24	27	151	163	12	146	2	2	1	M113_10-Mar_1b	0.613496933	0.662251656	magic
M113	1b	10	3	10-Mar	2016		4	24	27	151	163	12	146	2	3	124	M113_10-Mar_1b	76.07361963	82.1192053	magic
M113	1b	10	3	10-Mar	2016		4	24	27	151	163	12	146	2	4	22	M113_10-Mar_1b	13.49693252	14.56953642	magic
M113	1b	10	3	10-Mar	2016		4	24	27	151	163	12	146	2	5	1	M113_10-Mar_1b	0.613496933	0.662251656	magic
M113	1b	10	3	10-Mar	2016		4	24	27	151	163	12	146	2	6	0	M113_10-Mar_1b	0	0	magic
M113	1b	10	3	10-Mar	2016		4	24	27	151	163	12	146	2	7	0	M113_10-Mar_1b	0	0	magic
M113	1b	10	3	10-Mar	2016		4	24	27	151	163	12	146	2	8	2	M113_10-Mar_1b	1.226993865	1.324503311	magic
M113	1b	10	3	10-Mar	2016		4	24	27	151	163	12	146	2	9	0	M113_10-Mar_1b	0	0	magic
M113	1b	10	3	10-Mar	2016		4	24	27	151	163	12	146	2	10	0	M113_10-Mar_1b	0	0	magic
M113	1b	10	3	10-Mar	2016		4	24	27	151	163	12	146	2	11	1	M113_10-Mar_1b	0.613496933	0.662251656	magic
M113	3b	10	3	10-Mar	2016		4	27	27	159	165	6	145	1	1	0	M113_10-Mar_3b	0	0	magic
M113	3b	10	3	10-Mar	2016		4	27	27	159	165	6	145	1	2	2	M113_10-Mar_3b	1.212121212	1.257861635	magic
M113	3b	10	3	10-Mar	2016		4	27	27	159	165	6	145	1	3	113	M113_10-Mar_3b	68.48484848	71.06918239	magic
M113	3b	10	3	10-Mar	2016		4	27	27	159	165	6	145	1	4	33	M113_10-Mar_3b	20	20.75471698	magic
M113	3b	10	3	10-Mar	2016		4	27	27	159	165	6	145	1	5	8	M113_10-Mar_3b	4.848484848	5.031446541	magic
M113	3b	10	3	10-Mar	2016		4	27	27	159	165	6	145	1	6	1	M113_10-Mar_3b	0.606060606	0.628930818	magic
M113	3b	10	3	10-Mar	2016		4	27	27	159	165	6	145	1	7	2	M113_10-Mar_3b	1.212121212	1.257861635	magic
M113	3b	10	3	10-Mar	2016		4	27	27	159	165	6	145	1	8	0	M113_10-Mar_3b	0	0	magic
M113	3b	10	3	10-Mar	2016		4	27	27	159	165	6	145	1	9	0	M113_10-Mar_3b	0	0	magic
M113	3b	10	3	10-Mar	2016		4	27	27	159	165	6	145	1	10	0	M113_10-Mar_3b	0	0	magic
M113	3b	10	3	10-Mar	2016		4	27	27	159	165	6	145	1	11	0	M113_10-Mar_3b	0	0	magic
M114	1a	30	3	30-Mar	2016		4	33	33	233	233	0	154	1	1	0	M114_30-Mar_1a	0	0	magic
M114	1a	30	3	30-Mar	2016		4	33	33	233	233	0	154	1	2	0	M114_30-Mar_1a	0	0	magic
M114	1a	30	3	30-Mar	2016		4	33	33	233	233	0	154	1	3	212	M114_30-Mar_1a	90.98712446	90.98712446	magic
M114	1a	30	3	30-Mar	2016		4	33	33	233	233	0	154	1	4	21	M114_30-Mar_1a	9.012875536	9.012875536	magic
M114	1a	30	3	30-Mar	2016		4	33	33	233	233	0	154	1	5	0	M114_30-Mar_1a	0	0	magic
M114	1a	30	3	30-Mar	2016		4	33	33	233	233	0	154	1	6	0	M114_30-Mar_1a	0	0	magic
M114	1a	30	3	30-Mar	2016		4	33	33	233	233	0	154	1	7	0	M114_30-Mar_1a	0	0	magic
M114	1A	17	9	17-Sep	2015		1	24	24	98	98	0	170	1	1	0	M114_17-Sep_1A	0	0	magic
M114	1A	17	9	17-Sep	2015		1	24	24	98	98	0	170	1	2	0	M114_17-Sep_1A	0	0	magic
M114	1A	17	9	17-Sep	2015		1	24	24	98	98	0	170	1	3	3	M114_17-Sep_1A	3.06122449	3.06122449	magic
M114	1A	17	9	17-Sep	2015		1	24	24	98	98	0	170	1	4	33	M114_17-Sep_1A	33.67346939	33.67346939	magic
M114	1A	17	9	17-Sep	2015		1	24	24	98	98	0	170	1	5	36	M114_17-Sep_1A	36.73469388	36.73469388	magic
M114	1A	17	9	17-Sep	2015		1	24	24	98	98	0	170	1	6	21	M114_17-Sep_1A	21.42857143	21.42857143	magic
M114	1A	17	9	17-Sep	2015		1	24	24	98	98	0	170	1	7	3	M114_17-Sep_1A	3.06122449	3.06122449	magic
M114	1A	17	9	17-Sep	2015		1	24	24	98	98	0	170	1	8	2	M114_17-Sep_1A	2.040816327	2.040816327	magic
M114	1A	17	9	17-Sep	2015		1	24	24	93	96	3	178	5	1	0	M114_17-Sep_1A	0	0	magic
M114	1A	17	9	17-Sep	2015		1	24	24	93	96	3	178	5	2	0	M114_17-Sep_1A	0	0	magic
M114	1A	17	9	17-Sep	2015		1	24	24	93	96	3	178	5	3	10	M114_17-Sep_1A	10.41666667	10.75268817	magic
M114	1A	17	9	17-Sep	2015		1	24	24	93	96	3	178	5	4	43	M114_17-Sep_1A	44.79166667	46.23655914	magic
M114	1A	17	9	17-Sep	2015		1	24	24	93	96	3	178	5	5	28	M114_17-Sep_1A	29.16666667	30.10752688	magic
M114	1A	17	9	17-Sep	2015		1	24	24	93	96	3	178	5	6	8	M114_17-Sep_1A	8.333333333	8.602150538	magic
M114	1A	17	9	17-Sep	2015		1	24	24	93	96	3	178	5	7	4	M114_17-Sep_1A	4.166666667	4.301075269	magic
M114	1A	17	9	17-Sep	2015		1	24	24	93	96	3	178	5	8	0	M114_17-Sep_1A	0	0	magic
M114	1A	17	9	17-Sep	2015		1	24	24	112	117	5	179	6	1	0	M114_17-Sep_1A	0	0	magic
M114	1A	17	9	17-Sep	2015		1	24	24	112	117	5	179	6	2	0	M114_17-Sep_1A	0	0	magic
M114	1A	17	9	17-Sep	2015		1	24	24	112	117	5	179	6	3	4	M114_17-Sep_1A	3.418803419	3.571428571	magic
M114	1A	17	9	17-Sep	2015		1	24	24	112	117	5	179	6	4	26	M114_17-Sep_1A	22.22222222	23.21428571	magic
M114	1A	17	9	17-Sep	2015		1	24	24	112	117	5	179	6	5	45	M114_17-Sep_1A	38.46153846	40.17857143	magic
M114	1A	17	9	17-Sep	2015		1	24	24	112	117	5	179	6	6	32	M114_17-Sep_1A	27.35042735	28.57142857	magic
M114	1A	17	9	17-Sep	2015		1	24	24	112	117	5	179	6	7	3	M114_17-Sep_1A	2.564102564	2.678571429	magic
M114	1A	17	9	17-Sep	2015		1	24	24	112	117	5	179	6	8	2	M114_17-Sep_1A	1.709401709	1.785714286	magic
M114	1b	30	3	30-Mar	2016		4	33	33	225	226	1	156	3	1	0	M114_30-Mar_1b	0	0	magic
M114	1b	30	3	30-Mar	2016		4	33	33	225	226	1	156	3	2	0	M114_30-Mar_1b	0	0	magic
M114	1b	30	3	30-Mar	2016		4	33	33	225	226	1	156	3	3	143	M114_30-Mar_1b	63.27433628	63.55555556	magic
M114	1b	30	3	30-Mar	2016		4	33	33	225	226	1	156	3	4	65	M114_30-Mar_1b	28.76106195	28.88888889	magic
M114	1b	30	3	30-Mar	2016		4	33	33	225	226	1	156	3	5	15	M114_30-Mar_1b	6.637168142	6.666666667	magic
M114	1b	30	3	30-Mar	2016		4	33	33	225	226	1	156	3	6	2	M114_30-Mar_1b	0.884955752	0.888888889	magic
M114	1b	30	3	30-Mar	2016		4	33	33	225	226	1	156	3	7	0	M114_30-Mar_1b	0	0	magic
M114	1B	25	1	25-Jan	2016		1b	29	29	113	113	0	148	1	1	0	M114_25-Jan_1B	0	0	magic
M114	1B	25	1	25-Jan	2016		1b	29	29	113	113	0	148	1	2	7	M114_25-Jan_1B	6.194690265	6.194690265	magic
M114	1B	25	1	25-Jan	2016		1b	29	29	113	113	0	148	1	3	72	M114_25-Jan_1B	63.71681416	63.71681416	magic
M114	1B	25	1	25-Jan	2016		1b	29	29	113	113	0	148	1	4	32	M114_25-Jan_1B	28.31858407	28.31858407	magic
M114	1B	25	1	25-Jan	2016		1b	29	29	113	113	0	148	1	5	0	M114_25-Jan_1B	0	0	magic
M114	1B	25	1	25-Jan	2016		1b	29	29	113	113	0	148	1	6	2	M114_25-Jan_1B	1.769911504	1.769911504	magic
M114	1B	8	2	8-Feb	2016		1b	43	43	119	122	3	152	2	1	0	M114_08-Feb_1B	0	0	magic
M114	1B	8	2	8-Feb	2016		1b	43	43	119	122	3	152	2	2	9	M114_08-Feb_1B	7.37704918	7.56302521	magic
M114	1B	8	2	8-Feb	2016		1b	43	43	119	122	3	152	2	3	64	M114_08-Feb_1B	52.45901639	53.78151261	magic
M114	1B	8	2	8-Feb	2016		1b	43	43	119	122	3	152	2	4	39	M114_08-Feb_1B	31.96721311	32.77310924	magic
M114	1B	8	2	8-Feb	2016		1b	43	43	119	122	3	152	2	5	6	M114_08-Feb_1B	4.918032787	5.042016807	magic
M114	1B	8	2	8-Feb	2016		1b	43	43	119	122	3	152	2	6	1	M114_08-Feb_1B	0.819672131	0.840336134	magic
M114	2A	17	9	17-Sep	2015		1	24	24	105	106	1	173	2	1	0	M114_17-Sep_2A	0	0	magic
M114	2A	17	9	17-Sep	2015		1	24	24	105	106	1	173	2	2	13	M114_17-Sep_2A	12.26415094	12.38095238	magic
M114	2A	17	9	17-Sep	2015		1	24	24	105	106	1	173	2	3	35	M114_17-Sep_2A	33.01886792	33.33333333	magic
M114	2A	17	9	17-Sep	2015		1	24	24	105	106	1	173	2	4	42	M114_17-Sep_2A	39.62264151	40	magic
M114	2A	17	9	17-Sep	2015		1	24	24	105	106	1	173	2	5	12	M114_17-Sep_2A	11.32075472	11.42857143	magic
M114	2A	17	9	17-Sep	2015		1	24	24	105	106	1	173	2	6	3	M114_17-Sep_2A	2.830188679	2.857142857	magic
M114	2A	17	9	17-Sep	2015		1	24	24	105	106	1	173	2	7	0	M114_17-Sep_2A	0	0	magic
M114	2A	17	9	17-Sep	2015		1	24	24	105	106	1	173	2	8	0	M114_17-Sep_2A	0	0	magic
M114	2A	25	1	25-Jan	2016		1b	29	29	117	117	0	149	2	1	0	M114_25-Jan_2A	0	0	magic
M114	2A	25	1	25-Jan	2016		1b	29	29	117	117	0	149	2	2	5	M114_25-Jan_2A	4.273504274	4.273504274	magic
M114	2A	25	1	25-Jan	2016		1b	29	29	117	117	0	149	2	3	93	M114_25-Jan_2A	79.48717949	79.48717949	magic
M114	2A	25	1	25-Jan	2016		1b	29	29	117	117	0	149	2	4	18	M114_25-Jan_2A	15.38461538	15.38461538	magic
M114	2A	25	1	25-Jan	2016		1b	29	29	117	117	0	149	2	5	1	M114_25-Jan_2A	0.854700855	0.854700855	magic
M114	2A	25	1	25-Jan	2016		1b	29	29	117	117	0	149	2	6	0	M114_25-Jan_2A	0	0	magic
M114	2A	8	2	8-Feb	2016		1b	43	43	117	117	0	151	1	1	0	M114_08-Feb_2A	0	0	magic
M114	2A	8	2	8-Feb	2016		1b	43	43	117	117	0	151	1	2	3	M114_08-Feb_2A	2.564102564	2.564102564	magic
M114	2A	8	2	8-Feb	2016		1b	43	43	117	117	0	151	1	3	72	M114_08-Feb_2A	61.53846154	61.53846154	magic
M114	2A	8	2	8-Feb	2016		1b	43	43	117	117	0	151	1	4	36	M114_08-Feb_2A	30.76923077	30.76923077	magic
M114	2A	8	2	8-Feb	2016		1b	43	43	117	117	0	151	1	5	5	M114_08-Feb_2A	4.273504274	4.273504274	magic
M114	2A	8	2	8-Feb	2016		1b	43	43	117	117	0	151	1	6	1	M114_08-Feb_2A	0.854700855	0.854700855	magic
M114	3A	17	9	17-Sep	2015		1	24	24	167	169	2	175	3	1	0	M114_17-Sep_3A	0	0	magic
M114	3A	17	9	17-Sep	2015		1	24	24	167	169	2	175	3	2	14	M114_17-Sep_3A	8.284023669	8.383233533	magic
M114	3A	17	9	17-Sep	2015		1	24	24	167	169	2	175	3	3	11	M114_17-Sep_3A	6.50887574	6.586826347	magic
M114	3A	17	9	17-Sep	2015		1	24	24	167	169	2	175	3	4	33	M114_17-Sep_3A	19.52662722	19.76047904	magic
M114	3A	17	9	17-Sep	2015		1	24	24	167	169	2	175	3	5	71	M114_17-Sep_3A	42.01183432	42.51497006	magic
M114	3A	17	9	17-Sep	2015		1	24	24	167	169	2	175	3	6	35	M114_17-Sep_3A	20.71005917	20.95808383	magic
M114	3A	17	9	17-Sep	2015		1	24	24	167	169	2	175	3	7	3	M114_17-Sep_3A	1.775147929	1.796407186	magic
M114	3A	17	9	17-Sep	2015		1	24	24	167	169	2	175	3	8	0	M114_17-Sep_3A	0	0	magic
M114	3A	25	1	25-Jan	2016		1b	29	29	109	111	2	150	3	1	0	M114_25-Jan_3A	0	0	magic
M114	3A	25	1	25-Jan	2016		1b	29	29	109	111	2	150	3	2	18	M114_25-Jan_3A	16.21621622	16.51376147	magic
M114	3A	25	1	25-Jan	2016		1b	29	29	109	111	2	150	3	3	71	M114_25-Jan_3A	63.96396396	65.13761468	magic
M114	3A	25	1	25-Jan	2016		1b	29	29	109	111	2	150	3	4	20	M114_25-Jan_3A	18.01801802	18.34862385	magic
M114	3A	25	1	25-Jan	2016		1b	29	29	109	111	2	150	3	5	0	M114_25-Jan_3A	0	0	magic
M114	3A	25	1	25-Jan	2016		1b	29	29	109	111	2	150	3	6	0	M114_25-Jan_3A	0	0	magic
M114	3A	8	2	8-Feb	2016		1b	43	43	112	115	3	153	3	1	0	M114_08-Feb_3A	0	0	magic
M114	3A	8	2	8-Feb	2016		1b	43	43	112	115	3	153	3	2	23	M114_08-Feb_3A	20	20.53571429	magic
M114	3A	8	2	8-Feb	2016		1b	43	43	112	115	3	153	3	3	58	M114_08-Feb_3A	50.43478261	51.78571429	magic
M114	3A	8	2	8-Feb	2016		1b	43	43	112	115	3	153	3	4	29	M114_08-Feb_3A	25.2173913	25.89285714	magic
M114	3A	8	2	8-Feb	2016		1b	43	43	112	115	3	153	3	5	0	M114_08-Feb_3A	0	0	magic
M114	3A	8	2	8-Feb	2016		1b	43	43	112	115	3	153	3	6	2	M114_08-Feb_3A	1.739130435	1.785714286	magic
M114	3b	30	3	30-Mar	2016		4	33	33	309	309	0	155	2	1	0	M114_30-Mar_3b	0	0	magic
M114	3b	30	3	30-Mar	2016		4	33	33	309	309	0	155	2	2	14	M114_30-Mar_3b	4.530744337	4.530744337	magic
M114	3b	30	3	30-Mar	2016		4	33	33	309	309	0	155	2	3	276	M114_30-Mar_3b	89.32038835	89.32038835	magic
M114	3b	30	3	30-Mar	2016		4	33	33	309	309	0	155	2	4	16	M114_30-Mar_3b	5.177993528	5.177993528	magic
M114	3b	30	3	30-Mar	2016		4	33	33	309	309	0	155	2	5	2	M114_30-Mar_3b	0.647249191	0.647249191	magic
M114	3b	30	3	30-Mar	2016		4	33	33	309	309	0	155	2	6	0	M114_30-Mar_3b	0	0	magic
M114	3b	30	3	30-Mar	2016		4	33	33	309	309	0	155	2	7	1	M114_30-Mar_3b	0.323624595	0.323624595	magic
M114	5A	17	9	17-Sep	2015		1	24	24	110	112	2	176	4	1	0	M114_17-Sep_5A	0	0	magic
M114	5A	17	9	17-Sep	2015		1	24	24	110	112	2	176	4	2	1	M114_17-Sep_5A	0.892857143	0.909090909	magic
M114	5A	17	9	17-Sep	2015		1	24	24	110	112	2	176	4	3	1	M114_17-Sep_5A	0.892857143	0.909090909	magic
M114	5A	17	9	17-Sep	2015		1	24	24	110	112	2	176	4	4	18	M114_17-Sep_5A	16.07142857	16.36363636	magic
M114	5A	17	9	17-Sep	2015		1	24	24	110	112	2	176	4	5	49	M114_17-Sep_5A	43.75	44.54545455	magic
M114	5A	17	9	17-Sep	2015		1	24	24	110	112	2	176	4	6	37	M114_17-Sep_5A	33.03571429	33.63636364	magic
M114	5A	17	9	17-Sep	2015		1	24	24	110	112	2	176	4	7	4	M114_17-Sep_5A	3.571428571	3.636363636	magic
M114	5A	17	9	17-Sep	2015		1	24	24	110	112	2	176	4	8	0	M114_17-Sep_5A	0	0	magic
M115	1	25	11	25-Nov	2016	31/01/2017	13	25	26	21	131	110	192	2	1	0	M115_25-Nov_1	0	0	magic
M115	1	25	11	25-Nov	2016	31/01/2017	13	25	26	21	131	110	192	2	2	0	M115_25-Nov_1	0	0	magic
M115	1	25	11	25-Nov	2016	31/01/2017	13	25	26	21	131	110	192	2	3	10	M115_25-Nov_1	7.633587786	47.61904762	magic
M115	1	25	11	25-Nov	2016	31/01/2017	13	25	26	21	131	110	192	2	4	8	M115_25-Nov_1	6.106870229	38.0952381	magic
M115	1	25	11	25-Nov	2016	31/01/2017	13	25	26	21	131	110	192	2	5	3	M115_25-Nov_1	2.290076336	14.28571429	magic
M115	1	25	11	25-Nov	2016	31/01/2017	13	25	26	21	131	110	192	2	6	0	M115_25-Nov_1	0	0	magic
M115	1	25	11	25-Nov	2016	31/01/2017	13	25	26	21	131	110	192	2	7	0	M115_25-Nov_1	0	0	magic
M115	1b	31	3	31-Mar	2016		4	31	32	92	200	108	188	1	1	0	M115_31-Mar_1b	0	0	magic
M115	1b	31	3	31-Mar	2016		4	31	32	92	200	108	188	1	2	16	M115_31-Mar_1b	8	17.39130435	magic
M115	1b	31	3	31-Mar	2016		4	31	32	92	200	108	188	1	3	48	M115_31-Mar_1b	24	52.17391304	magic
M115	1b	31	3	31-Mar	2016		4	31	32	92	200	108	188	1	4	18	M115_31-Mar_1b	9	19.56521739	magic
M115	1b	31	3	31-Mar	2016		4	31	32	92	200	108	188	1	5	7	M115_31-Mar_1b	3.5	7.608695652	magic
M115	1b	31	3	31-Mar	2016		4	31	32	92	200	108	188	1	6	3	M115_31-Mar_1b	1.5	3.260869565	magic
M115	1b	31	3	31-Mar	2016		4	31	32	92	200	108	188	1	7	0	M115_31-Mar_1b	0	0	magic
M115	1b	31	3	31-Mar	2016		4	31	32	92	200	108	188	1	8	0	M115_31-Mar_1b	0	0	magic
M115	1b	31	3	31-Mar	2016		4	31	32	92	200	108	188	1	9	0	M115_31-Mar_1b	0	0	magic
M115	1b	31	3	31-Mar	2016		4	31	32	92	200	108	188	1	10	0	M115_31-Mar_1b	0	0	magic
M115	1b	31	3	31-Mar	2016		4	31	32	92	200	108	188	1	11	0	M115_31-Mar_1b	0	0	magic
M115	1b	31	3	31-Mar	2016		4	31	32	92	200	108	188	1	12	0	M115_31-Mar_1b	0	0	magic
M115	1b	31	3	31-Mar	2016		4	31	32	92	200	108	188	1	13	0	M115_31-Mar_1b	0	0	magic
M115	1b	31	3	31-Mar	2016		4	31	32	92	200	108	188	1	14	0	M115_31-Mar_1b	0	0	magic
M115	2	25	11	25-Nov	2016	4/1/2017	13	29	26	26	140	114	193	3	1	0	M115_25-Nov_2	0	0	magic
M115	2	25	11	25-Nov	2016	4/1/2017	13	29	26	26	140	114	193	3	2	0	M115_25-Nov_2	0	0	magic
M115	2	25	11	25-Nov	2016	4/1/2017	13	29	26	26	140	114	193	3	3	22	M115_25-Nov_2	15.71428571	84.61538462	magic
M115	2	25	11	25-Nov	2016	4/1/2017	13	29	26	26	140	114	193	3	4	4	M115_25-Nov_2	2.857142857	15.38461538	magic
M115	2	25	11	25-Nov	2016	4/1/2017	13	29	26	26	140	114	193	3	5	0	M115_25-Nov_2	0	0	magic
M115	2	25	11	25-Nov	2016	4/1/2017	13	29	26	26	140	114	193	3	6	0	M115_25-Nov_2	0	0	magic
M115	2	25	11	25-Nov	2016	4/1/2017	13	29	26	26	140	114	193	3	7	0	M115_25-Nov_2	0	0	magic
M115	3	25	11	25-Nov	2016	4/1/2017	13	25	26	11	115	104	191	1	1	0	M115_25-Nov_3	0	0	magic
M115	3	25	11	25-Nov	2016	4/1/2017	13	25	26	11	115	104	191	1	2	0	M115_25-Nov_3	0	0	magic
M115	3	25	11	25-Nov	2016	4/1/2017	13	25	26	11	115	104	191	1	3	9	M115_25-Nov_3	7.826086957	81.81818182	magic
M115	3	25	11	25-Nov	2016	4/1/2017	13	25	26	11	115	104	191	1	4	0	M115_25-Nov_3	0	0	magic
M115	3	25	11	25-Nov	2016	4/1/2017	13	25	26	11	115	104	191	1	5	0	M115_25-Nov_3	0	0	magic
M115	3	25	11	25-Nov	2016	4/1/2017	13	25	26	11	115	104	191	1	6	0	M115_25-Nov_3	0	0	magic
M115	3	25	11	25-Nov	2016	4/1/2017	13	25	26	11	115	104	191	1	7	2	M115_25-Nov_3	1.739130435	18.18181818	magic
M115	3a	31	3	31-Mar	2016		4	31	32	20	178	158	189	2	1	0	M115_31-Mar_3a	0	0	magic
M115	3a	31	3	31-Mar	2016		4	31	32	20	178	158	189	2	2	0	M115_31-Mar_3a	0	0	magic
M115	3a	31	3	31-Mar	2016		4	31	32	20	178	158	189	2	3	9	M115_31-Mar_3a	5.056179775	45	magic
M115	3a	31	3	31-Mar	2016		4	31	32	20	178	158	189	2	4	9	M115_31-Mar_3a	5.056179775	45	magic
M115	3a	31	3	31-Mar	2016		4	31	32	20	178	158	189	2	5	1	M115_31-Mar_3a	0.561797753	5	magic
M115	3a	31	3	31-Mar	2016		4	31	32	20	178	158	189	2	6	0	M115_31-Mar_3a	0	0	magic
M115	3a	31	3	31-Mar	2016		4	31	32	20	178	158	189	2	7	1	M115_31-Mar_3a	0.561797753	5	magic
M115	3a	31	3	31-Mar	2016		4	31	32	20	178	158	189	2	8	0	M115_31-Mar_3a	0	0	magic
M115	3a	31	3	31-Mar	2016		4	31	32	20	178	158	189	2	9	0	M115_31-Mar_3a	0	0	magic
M115	3a	31	3	31-Mar	2016		4	31	32	20	178	158	189	2	10	0	M115_31-Mar_3a	0	0	magic
M115	3a	31	3	31-Mar	2016		4	31	32	20	178	158	189	2	11	0	M115_31-Mar_3a	0	0	magic
M115	3a	31	3	31-Mar	2016		4	31	32	20	178	158	189	2	12	0	M115_31-Mar_3a	0	0	magic
M115	3a	31	3	31-Mar	2016		4	31	32	20	178	158	189	2	13	0	M115_31-Mar_3a	0	0	magic
M115	3a	31	3	31-Mar	2016		4	31	32	20	178	158	189	2	14	0	M115_31-Mar_3a	0	0	magic
M115	3b	31	3	31-Mar	2016		4	34	32	24	190	166	190	3	1	0	M115_31-Mar_3b	0	0	magic
M115	3b	31	3	31-Mar	2016		4	34	32	24	190	166	190	3	2	0	M115_31-Mar_3b	0	0	magic
M115	3b	31	3	31-Mar	2016		4	34	32	24	190	166	190	3	3	4	M115_31-Mar_3b	2.105263158	16.66666667	magic
M115	3b	31	3	31-Mar	2016		4	34	32	24	190	166	190	3	4	9	M115_31-Mar_3b	4.736842105	37.5	magic
M115	3b	31	3	31-Mar	2016		4	34	32	24	190	166	190	3	5	5	M115_31-Mar_3b	2.631578947	20.83333333	magic
M115	3b	31	3	31-Mar	2016		4	34	32	24	190	166	190	3	6	0	M115_31-Mar_3b	0	0	magic
M115	3b	31	3	31-Mar	2016		4	34	32	24	190	166	190	3	7	2	M115_31-Mar_3b	1.052631579	8.333333333	magic
M115	3b	31	3	31-Mar	2016		4	34	32	24	190	166	190	3	8	1	M115_31-Mar_3b	0.526315789	4.166666667	magic
M115	3b	31	3	31-Mar	2016		4	34	32	24	190	166	190	3	9	0	M115_31-Mar_3b	0	0	magic
M115	3b	31	3	31-Mar	2016		4	34	32	24	190	166	190	3	10	1	M115_31-Mar_3b	0.526315789	4.166666667	magic
M115	3b	31	3	31-Mar	2016		4	34	32	24	190	166	190	3	11	0	M115_31-Mar_3b	0	0	magic
M115	3b	31	3	31-Mar	2016		4	34	32	24	190	166	190	3	12	0	M115_31-Mar_3b	0	0	magic
M115	3b	31	3	31-Mar	2016		4	34	32	24	190	166	190	3	13	0	M115_31-Mar_3b	0	0	magic
M115	3b	31	3	31-Mar	2016		4	34	32	24	190	166	190	3	14	2	M115_31-Mar_3b	1.052631579	8.333333333	magic
M116	2b	30	3	30-Mar	2016		4	37	37	224	226	2	195	2	1	0	M116_30-Mar_2b	0	0	magic
M116	2b	30	3	30-Mar	2016		4	37	37	224	226	2	195	2	2	19	M116_30-Mar_2b	8.407079646	8.482142857	magic
M116	2b	30	3	30-Mar	2016		4	37	37	224	226	2	195	2	3	201	M116_30-Mar_2b	88.9380531	89.73214286	magic
M116	2b	30	3	30-Mar	2016		4	37	37	224	226	2	195	2	4	4	M116_30-Mar_2b	1.769911504	1.785714286	magic
M116	3b	30	3	30-Mar	2016		4	37	37	251	252	1	194	1	1	0	M116_30-Mar_3b	0	0	magic
M116	3b	30	3	30-Mar	2016		4	37	37	251	252	1	194	1	2	43	M116_30-Mar_3b	17.06349206	17.1314741	magic
M116	3b	30	3	30-Mar	2016		4	37	37	251	252	1	194	1	3	207	M116_30-Mar_3b	82.14285714	82.47011952	magic
M116	3b	30	3	30-Mar	2016		4	37	37	251	252	1	194	1	4	1	M116_30-Mar_3b	0.396825397	0.398406375	magic
M117	1a	6	4	6-Apr	2016		4	30	34	189	192	3	198	3	1	0	M117_06-Apr_1a	0	0	magic
M117	1a	6	4	6-Apr	2016		4	30	34	189	192	3	198	3	2	121	M117_06-Apr_1a	63.02083333	64.02116402	magic
M117	1a	6	4	6-Apr	2016		4	30	34	189	192	3	198	3	3	63	M117_06-Apr_1a	32.8125	33.33333333	magic
M117	1a	6	4	6-Apr	2016		4	30	34	189	192	3	198	3	4	4	M117_06-Apr_1a	2.083333333	2.116402116	magic
M117	1a	6	4	6-Apr	2016		4	30	34	189	192	3	198	3	5	1	M117_06-Apr_1a	0.520833333	0.529100529	magic
M117	1b	6	4	6-Apr	2016		4	30	34	172	174	2	197	2	1	0	M117_06-Apr_1b	0	0	magic
M117	1b	6	4	6-Apr	2016		4	30	34	172	174	2	197	2	2	114	M117_06-Apr_1b	65.51724138	66.27906977	magic
M117	1b	6	4	6-Apr	2016		4	30	34	172	174	2	197	2	3	57	M117_06-Apr_1b	32.75862069	33.13953488	magic
M117	1b	6	4	6-Apr	2016		4	30	34	172	174	2	197	2	4	1	M117_06-Apr_1b	0.574712644	0.581395349	magic
M117	1b	6	4	6-Apr	2016		4	30	34	172	174	2	197	2	5	0	M117_06-Apr_1b	0	0	magic
M117	3a	6	4	6-Apr	2016		4	41	34	181	181	0	196	1	1	0	M117_06-Apr_3a	0	0	magic
M117	3a	6	4	6-Apr	2016		4	41	34	181	181	0	196	1	2	138	M117_06-Apr_3a	76.24309392	76.24309392	magic
M117	3a	6	4	6-Apr	2016		4	41	34	181	181	0	196	1	3	38	M117_06-Apr_3a	20.99447514	20.99447514	magic
M117	3a	6	4	6-Apr	2016		4	41	34	181	181	0	196	1	4	4	M117_06-Apr_3a	2.209944751	2.209944751	magic
M117	3a	6	4	6-Apr	2016		4	41	34	181	181	0	196	1	5	1	M117_06-Apr_3a	0.552486188	0.552486188	magic
M118	1b	30	3	30-Mar	2016		4	37	37	163	166	3	199	1	1	0	M118_30-Mar_1b	0	0	magic
M118	1b	30	3	30-Mar	2016		4	37	37	163	166	3	199	1	2	7	M118_30-Mar_1b	4.21686747	4.294478528	magic
M118	1b	30	3	30-Mar	2016		4	37	37	163	166	3	199	1	3	134	M118_30-Mar_1b	80.72289157	82.20858896	magic
M118	1b	30	3	30-Mar	2016		4	37	37	163	166	3	199	1	4	19	M118_30-Mar_1b	11.44578313	11.65644172	magic
M118	1b	30	3	30-Mar	2016		4	37	37	163	166	3	199	1	5	3	M118_30-Mar_1b	1.807228916	1.840490798	magic
M118	2a	30	3	30-Mar	2016		4	37	37	241	249	8	201	3	1	0	M118_30-Mar_2a	0	0	magic
M118	2a	30	3	30-Mar	2016		4	37	37	241	249	8	201	3	2	24	M118_30-Mar_2a	9.638554217	9.958506224	magic
M118	2a	30	3	30-Mar	2016		4	37	37	241	249	8	201	3	3	199	M118_30-Mar_2a	79.91967871	82.57261411	magic
M118	2a	30	3	30-Mar	2016		4	37	37	241	249	8	201	3	4	14	M118_30-Mar_2a	5.62248996	5.809128631	magic
M118	2a	30	3	30-Mar	2016		4	37	37	241	249	8	201	3	5	4	M118_30-Mar_2a	1.606425703	1.659751037	magic
M118	2b	30	3	30-Mar	2016		4	37	37	204	210	6	200	2	1	0	M118_30-Mar_2b	0	0	magic
M118	2b	30	3	30-Mar	2016		4	37	37	204	210	6	200	2	2	2	M118_30-Mar_2b	0.952380952	0.980392157	magic
M118	2b	30	3	30-Mar	2016		4	37	37	204	210	6	200	2	3	190	M118_30-Mar_2b	90.47619048	93.1372549	magic
M118	2b	30	3	30-Mar	2016		4	37	37	204	210	6	200	2	4	11	M118_30-Mar_2b	5.238095238	5.392156863	magic
M118	2b	30	3	30-Mar	2016		4	37	37	204	210	6	200	2	5	1	M118_30-Mar_2b	0.476190476	0.490196078	magic
M119	1a	6	4	6-Apr	2016		4	30	30	125	170	45	203	2	1	0	M119_06-Apr_1a	0	0	magic
M119	1a	6	4	6-Apr	2016		4	30	30	125	170	45	203	2	2	23	M119_06-Apr_1a	13.52941176	18.4	magic
M119	1a	6	4	6-Apr	2016		4	30	30	125	170	45	203	2	3	79	M119_06-Apr_1a	46.47058824	63.2	magic
M119	1a	6	4	6-Apr	2016		4	30	30	125	170	45	203	2	4	11	M119_06-Apr_1a	6.470588235	8.8	magic
M119	1a	6	4	6-Apr	2016		4	30	30	125	170	45	203	2	5	12	M119_06-Apr_1a	7.058823529	9.6	magic
M119	1a	6	4	6-Apr	2016		4	30	30	125	170	45	203	2	6	0	M119_06-Apr_1a	0	0	magic
M119	1a	6	4	6-Apr	2016		4	30	30	125	170	45	203	2	7	0	M119_06-Apr_1a	0	0	magic
M119	1a	6	4	6-Apr	2016		4	30	30	125	170	45	203	2	8	0	M119_06-Apr_1a	0	0	magic
M119	1A	2	10	2-Oct	2015		1	28	32	50	108	58	212	2	1	0	M119_02-Oct_1A	0	0	magic
M119	1A	2	10	2-Oct	2015		1	28	32	50	108	58	212	2	2	16	M119_02-Oct_1A	14.81481481	32	magic
M119	1A	2	10	2-Oct	2015		1	28	32	50	108	58	212	2	3	23	M119_02-Oct_1A	21.2962963	46	magic
M119	1A	2	10	2-Oct	2015		1	28	32	50	108	58	212	2	4	8	M119_02-Oct_1A	7.407407407	16	magic
M119	1A	2	10	2-Oct	2015		1	28	32	50	108	58	212	2	5	3	M119_02-Oct_1A	2.777777778	6	magic
M119	1A	2	10	2-Oct	2015		1	28	32	50	108	58	212	2	6	0	M119_02-Oct_1A	0	0	magic
M119	1A	2	10	2-Oct	2015		1	28	32	50	108	58	212	2	7	0	M119_02-Oct_1A	0	0	magic
M119	3a	6	4	6-Apr	2016		4	30	30	149	193	44	202	1	1	0	M119_06-Apr_3a	0	0	magic
M119	3a	6	4	6-Apr	2016		4	30	30	149	193	44	202	1	2	24	M119_06-Apr_3a	12.43523316	16.10738255	magic
M119	3a	6	4	6-Apr	2016		4	30	30	149	193	44	202	1	3	91	M119_06-Apr_3a	47.15025907	61.0738255	magic
M119	3a	6	4	6-Apr	2016		4	30	30	149	193	44	202	1	4	22	M119_06-Apr_3a	11.39896373	14.76510067	magic
M119	3a	6	4	6-Apr	2016		4	30	30	149	193	44	202	1	5	11	M119_06-Apr_3a	5.699481865	7.382550336	magic
M119	3a	6	4	6-Apr	2016		4	30	30	149	193	44	202	1	6	0	M119_06-Apr_3a	0	0	magic
M119	3a	6	4	6-Apr	2016		4	30	30	149	193	44	202	1	7	0	M119_06-Apr_3a	0	0	magic
M119	3a	6	4	6-Apr	2016		4	30	30	149	193	44	202	1	8	1	M119_06-Apr_3a	0.518134715	0.67114094	magic
M119	3A	2	10	2-Oct	2015		1	39	32	23	114	91	214	3	1	0	M119_02-Oct_3A	0	0	magic
M119	3A	2	10	2-Oct	2015		1	39	32	23	114	91	214	3	2	4	M119_02-Oct_3A	3.50877193	17.39130435	magic
M119	3A	2	10	2-Oct	2015		1	39	32	23	114	91	214	3	3	13	M119_02-Oct_3A	11.40350877	56.52173913	magic
M119	3A	2	10	2-Oct	2015		1	39	32	23	114	91	214	3	4	3	M119_02-Oct_3A	2.631578947	13.04347826	magic
M119	3A	2	10	2-Oct	2015		1	39	32	23	114	91	214	3	5	2	M119_02-Oct_3A	1.754385965	8.695652174	magic
M119	3A	2	10	2-Oct	2015		1	39	32	23	114	91	214	3	6	0	M119_02-Oct_3A	0	0	magic
M119	3A	2	10	2-Oct	2015		1	39	32	23	114	91	214	3	7	1	M119_02-Oct_3A	0.877192982	4.347826087	magic
M119	3b	6	4	6-Apr	2016		4	30	30	129	184	55	204	3	1	0	M119_06-Apr_3b	0	0	magic
M119	3b	6	4	6-Apr	2016		4	30	30	129	184	55	204	3	2	36	M119_06-Apr_3b	19.56521739	27.90697674	magic
M119	3b	6	4	6-Apr	2016		4	30	30	129	184	55	204	3	3	67	M119_06-Apr_3b	36.41304348	51.9379845	magic
M119	3b	6	4	6-Apr	2016		4	30	30	129	184	55	204	3	4	12	M119_06-Apr_3b	6.52173913	9.302325581	magic
M119	3b	6	4	6-Apr	2016		4	30	30	129	184	55	204	3	5	7	M119_06-Apr_3b	3.804347826	5.426356589	magic
M119	3b	6	4	6-Apr	2016		4	30	30	129	184	55	204	3	6	6	M119_06-Apr_3b	3.260869565	4.651162791	magic
M119	3b	6	4	6-Apr	2016		4	30	30	129	184	55	204	3	7	1	M119_06-Apr_3b	0.543478261	0.775193798	magic
M119	3b	6	4	6-Apr	2016		4	30	30	129	184	55	204	3	8	0	M119_06-Apr_3b	0	0	magic
M119	5A	2	10	2-Oct	2015		1	28	32	102	110	8	210	1	1	0	M119_02-Oct_5A	0	0	magic
M119	5A	2	10	2-Oct	2015		1	28	32	102	110	8	210	1	2	67	M119_02-Oct_5A	60.90909091	65.68627451	magic
M119	5A	2	10	2-Oct	2015		1	28	32	102	110	8	210	1	3	31	M119_02-Oct_5A	28.18181818	30.39215686	magic
M119	5A	2	10	2-Oct	2015		1	28	32	102	110	8	210	1	4	2	M119_02-Oct_5A	1.818181818	1.960784314	magic
M119	5A	2	10	2-Oct	2015		1	28	32	102	110	8	210	1	5	1	M119_02-Oct_5A	0.909090909	0.980392157	magic
M119	5A	2	10	2-Oct	2015		1	28	32	102	110	8	210	1	6	1	M119_02-Oct_5A	0.909090909	0.980392157	magic
M119	5A	2	10	2-Oct	2015		1	28	32	102	110	8	210	1	7	0	M119_02-Oct_5A	0	0	magic
M12	2A	1	10	1-Oct	2015		1	30	30	43	120	77	237	2	1	0	M12_01-Oct_2A	0	0	magic
M12	2A	1	10	1-Oct	2015		1	30	30	43	120	77	237	2	2	0	M12_01-Oct_2A	0	0	magic
M12	2A	1	10	1-Oct	2015		1	30	30	43	120	77	237	2	3	39	M12_01-Oct_2A	32.5	90.69767442	magic
M12	2A	1	10	1-Oct	2015		1	30	30	43	120	77	237	2	4	4	M12_01-Oct_2A	3.333333333	9.302325581	magic
M12	2A	1	10	1-Oct	2015		1	30	30	43	120	77	237	2	5	0	M12_01-Oct_2A	0	0	magic
M12	2B	25	1	25-Jan	2016		1b	29	33	80	109	29	223	1	1	0	M12_25-Jan_2B	0	0	magic
M12	2B	25	1	25-Jan	2016		1b	29	33	80	109	29	223	1	2	0	M12_25-Jan_2B	0	0	magic
M12	2B	25	1	25-Jan	2016		1b	29	33	80	109	29	223	1	3	42	M12_25-Jan_2B	38.53211009	52.5	magic
M12	2B	25	1	25-Jan	2016		1b	29	33	80	109	29	223	1	4	32	M12_25-Jan_2B	29.35779817	40	magic
M12	2B	25	1	25-Jan	2016		1b	29	33	80	109	29	223	1	5	5	M12_25-Jan_2B	4.587155963	6.25	magic
M12	2B	25	1	25-Jan	2016		1b	29	33	80	109	29	223	1	6	1	M12_25-Jan_2B	0.917431193	1.25	magic
M12	3A	1	10	1-Oct	2015		1	30	30	57	112	55	233	1	1	0	M12_01-Oct_3A	0	0	magic
M12	3A	1	10	1-Oct	2015		1	30	30	57	112	55	233	1	2	8	M12_01-Oct_3A	7.142857143	14.03508772	magic
M12	3A	1	10	1-Oct	2015		1	30	30	57	112	55	233	1	3	46	M12_01-Oct_3A	41.07142857	80.70175439	magic
M12	3A	1	10	1-Oct	2015		1	30	30	57	112	55	233	1	4	3	M12_01-Oct_3A	2.678571429	5.263157895	magic
M12	3B	25	1	25-Jan	2016		1b	37	33	94	129	35	224	2	1	0	M12_25-Jan_3B	0	0	magic
M12	3B	25	1	25-Jan	2016		1b	37	33	94	129	35	224	2	2	1	M12_25-Jan_3B	0.775193798	1.063829787	magic
M12	3B	25	1	25-Jan	2016		1b	37	33	94	129	35	224	2	3	30	M12_25-Jan_3B	23.25581395	31.91489362	magic
M12	3B	25	1	25-Jan	2016		1b	37	33	94	129	35	224	2	4	58	M12_25-Jan_3B	44.96124031	61.70212766	magic
M12	3B	25	1	25-Jan	2016		1b	37	33	94	129	35	224	2	5	4	M12_25-Jan_3B	3.100775194	4.255319149	magic
M12	3B	25	1	25-Jan	2016		1b	37	33	94	129	35	224	2	6	1	M12_25-Jan_3B	0.775193798	1.063829787	magic
M12	5A	1	10	1-Oct	2015		1	30	30	34	111	77	238	3	1	0	M12_01-Oct_5A	0	0	magic
M12	5A	1	10	1-Oct	2015		1	30	30	34	111	77	238	3	2	0	M12_01-Oct_5A	0	0	magic
M12	5A	1	10	1-Oct	2015		1	30	30	34	111	77	238	3	3	32	M12_01-Oct_5A	28.82882883	94.11764706	magic
M12	5A	1	10	1-Oct	2015		1	30	30	34	111	77	238	3	4	2	M12_01-Oct_5A	1.801801802	5.882352941	magic
M12	5A	1	10	1-Oct	2015		1	30	30	34	111	77	238	3	5	0	M12_01-Oct_5A	0	0	magic
M121	1a	10	3	10-Mar	2016		4	24	25	161	164	3	243	2	1	0	M121_10-Mar_1a	0	0	magic
M121	1a	10	3	10-Mar	2016		4	24	25	161	164	3	243	2	2	0	M121_10-Mar_1a	0	0	magic
M121	1a	10	3	10-Mar	2016		4	24	25	161	164	3	243	2	3	112	M121_10-Mar_1a	68.29268293	69.56521739	magic
M121	1a	10	3	10-Mar	2016		4	24	25	161	164	3	243	2	4	30	M121_10-Mar_1a	18.29268293	18.63354037	magic
M121	1a	10	3	10-Mar	2016		4	24	25	161	164	3	243	2	5	11	M121_10-Mar_1a	6.707317073	6.832298137	magic
M121	1a	10	3	10-Mar	2016		4	24	25	161	164	3	243	2	6	4	M121_10-Mar_1a	2.43902439	2.48447205	magic
M121	1a	10	3	10-Mar	2016		4	24	25	161	164	3	243	2	7	0	M121_10-Mar_1a	0	0	magic
M121	1a	10	3	10-Mar	2016		4	24	25	161	164	3	243	2	8	2	M121_10-Mar_1a	1.219512195	1.242236025	magic
M121	1a	10	3	10-Mar	2016		4	24	25	161	164	3	243	2	9	1	M121_10-Mar_1a	0.609756098	0.621118012	magic
M121	1a	10	3	10-Mar	2016		4	24	25	161	164	3	243	2	10	0	M121_10-Mar_1a	0	0	magic
M121	1a	10	3	10-Mar	2016		4	24	25	161	164	3	243	2	11	1	M121_10-Mar_1a	0.609756098	0.621118012	magic
M121	2	10	3	10-Mar	2016		4	27	25	170	171	1	242	1	1	0	M121_10-Mar_2	0	0	magic
M121	2	10	3	10-Mar	2016		4	27	25	170	171	1	242	1	2	1	M121_10-Mar_2	0.584795322	0.588235294	magic
M121	2	10	3	10-Mar	2016		4	27	25	170	171	1	242	1	3	163	M121_10-Mar_2	95.32163743	95.88235294	magic
M121	2	10	3	10-Mar	2016		4	27	25	170	171	1	242	1	4	6	M121_10-Mar_2	3.50877193	3.529411765	magic
M121	2	10	3	10-Mar	2016		4	27	25	170	171	1	242	1	5	0	M121_10-Mar_2	0	0	magic
M121	2	10	3	10-Mar	2016		4	27	25	170	171	1	242	1	6	0	M121_10-Mar_2	0	0	magic
M121	2	10	3	10-Mar	2016		4	27	25	170	171	1	242	1	7	0	M121_10-Mar_2	0	0	magic
M121	2	10	3	10-Mar	2016		4	27	25	170	171	1	242	1	8	0	M121_10-Mar_2	0	0	magic
M121	2	10	3	10-Mar	2016		4	27	25	170	171	1	242	1	9	0	M121_10-Mar_2	0	0	magic
M121	2	10	3	10-Mar	2016		4	27	25	170	171	1	242	1	10	0	M121_10-Mar_2	0	0	magic
M121	2	10	3	10-Mar	2016		4	27	25	170	171	1	242	1	11	0	M121_10-Mar_2	0	0	magic
M121	2b	10	3	10-Mar	2016		4	24	25	157	160	3	244	3	1	0	M121_10-Mar_2b	0	0	magic
M121	2b	10	3	10-Mar	2016		4	24	25	157	160	3	244	3	2	22	M121_10-Mar_2b	13.75	14.01273885	magic
M121	2b	10	3	10-Mar	2016		4	24	25	157	160	3	244	3	3	101	M121_10-Mar_2b	63.125	64.33121019	magic
M121	2b	10	3	10-Mar	2016		4	24	25	157	160	3	244	3	4	23	M121_10-Mar_2b	14.375	14.64968153	magic
M121	2b	10	3	10-Mar	2016		4	24	25	157	160	3	244	3	5	5	M121_10-Mar_2b	3.125	3.184713376	magic
M121	2b	10	3	10-Mar	2016		4	24	25	157	160	3	244	3	6	2	M121_10-Mar_2b	1.25	1.27388535	magic
M121	2b	10	3	10-Mar	2016		4	24	25	157	160	3	244	3	7	0	M121_10-Mar_2b	0	0	magic
M121	2b	10	3	10-Mar	2016		4	24	25	157	160	3	244	3	8	3	M121_10-Mar_2b	1.875	1.910828025	magic
M121	2b	10	3	10-Mar	2016		4	24	25	157	160	3	244	3	9	1	M121_10-Mar_2b	0.625	0.636942675	magic
M121	2b	10	3	10-Mar	2016		4	24	25	157	160	3	244	3	10	0	M121_10-Mar_2b	0	0	magic
M121	2b	10	3	10-Mar	2016		4	24	25	157	160	3	244	3	11	0	M121_10-Mar_2b	0	0	magic
M122	1b	10	3	10-Mar	2016		4	31	29	162	164	2	246	2	1	0	M122_10-Mar_1b	0	0	magic
M122	1b	10	3	10-Mar	2016		4	31	29	162	164	2	246	2	2	3	M122_10-Mar_1b	1.829268293	1.851851852	magic
M122	1b	10	3	10-Mar	2016		4	31	29	162	164	2	246	2	3	124	M122_10-Mar_1b	75.6097561	76.54320988	magic
M122	1b	10	3	10-Mar	2016		4	31	29	162	164	2	246	2	4	30	M122_10-Mar_1b	18.29268293	18.51851852	magic
M122	1b	10	3	10-Mar	2016		4	31	29	162	164	2	246	2	5	3	M122_10-Mar_1b	1.829268293	1.851851852	magic
M122	1b	10	3	10-Mar	2016		4	31	29	162	164	2	246	2	6	0	M122_10-Mar_1b	0	0	magic
M122	1b	10	3	10-Mar	2016		4	31	29	162	164	2	246	2	7	0	M122_10-Mar_1b	0	0	magic
M122	1b	10	3	10-Mar	2016		4	31	29	162	164	2	246	2	8	2	M122_10-Mar_1b	1.219512195	1.234567901	magic
M122	2b	10	3	10-Mar	2016		4	24	29	163	163	0	245	1	1	0	M122_10-Mar_2b	0	0	magic
M122	2b	10	3	10-Mar	2016		4	24	29	163	163	0	245	1	2	0	M122_10-Mar_2b	0	0	magic
M122	2b	10	3	10-Mar	2016		4	24	29	163	163	0	245	1	3	124	M122_10-Mar_2b	76.07361963	76.07361963	magic
M122	2b	10	3	10-Mar	2016		4	24	29	163	163	0	245	1	4	37	M122_10-Mar_2b	22.6993865	22.6993865	magic
M122	2b	10	3	10-Mar	2016		4	24	29	163	163	0	245	1	5	2	M122_10-Mar_2b	1.226993865	1.226993865	magic
M122	2b	10	3	10-Mar	2016		4	24	29	163	163	0	245	1	6	0	M122_10-Mar_2b	0	0	magic
M122	2b	10	3	10-Mar	2016		4	24	29	163	163	0	245	1	7	0	M122_10-Mar_2b	0	0	magic
M122	2b	10	3	10-Mar	2016		4	24	29	163	163	0	245	1	8	0	M122_10-Mar_2b	0	0	magic
M122	3a	10	3	10-Mar	2016		4	31	29	151	153	2	247	3	1	0	M122_10-Mar_3a	0	0	magic
M122	3a	10	3	10-Mar	2016		4	31	29	151	153	2	247	3	2	2	M122_10-Mar_3a	1.307189542	1.324503311	magic
M122	3a	10	3	10-Mar	2016		4	31	29	151	153	2	247	3	3	145	M122_10-Mar_3a	94.77124183	96.02649007	magic
M122	3a	10	3	10-Mar	2016		4	31	29	151	153	2	247	3	4	4	M122_10-Mar_3a	2.614379085	2.649006623	magic
M122	3a	10	3	10-Mar	2016		4	31	29	151	153	2	247	3	5	0	M122_10-Mar_3a	0	0	magic
M122	3a	10	3	10-Mar	2016		4	31	29	151	153	2	247	3	6	0	M122_10-Mar_3a	0	0	magic
M122	3a	10	3	10-Mar	2016		4	31	29	151	153	2	247	3	7	0	M122_10-Mar_3a	0	0	magic
M122	3a	10	3	10-Mar	2016		4	31	29	151	153	2	247	3	8	0	M122_10-Mar_3a	0	0	magic
M123	1	11	11	11-Nov	2016	4/1/2017	13	42	42	139	139	0	251	1	1	0	M123_11-Nov_1	0	0	magic
M123	1	11	11	11-Nov	2016	4/1/2017	13	42	42	139	139	0	251	1	2	121	M123_11-Nov_1	87.05035971	87.05035971	magic
M123	1	11	11	11-Nov	2016	4/1/2017	13	42	42	139	139	0	251	1	3	15	M123_11-Nov_1	10.79136691	10.79136691	magic
M123	1	11	11	11-Nov	2016	4/1/2017	13	42	42	139	139	0	251	1	4	3	M123_11-Nov_1	2.158273381	2.158273381	magic
M123	1a	3	4	3-Apr	2016		4	34	30	175	175	0	248	1	1	0	M123_03-Apr_1a	0	0	magic
M123	1a	3	4	3-Apr	2016		4	34	30	175	175	0	248	1	2	175	M123_03-Apr_1a	100	100	magic
M123	1a	3	4	3-Apr	2016		4	34	30	175	175	0	248	1	3	0	M123_03-Apr_1a	0	0	magic
M123	1b	3	4	3-Apr	2016		4	30	30	184	184	0	249	2	1	0	M123_03-Apr_1b	0	0	magic
M123	1b	3	4	3-Apr	2016		4	30	30	184	184	0	249	2	2	182	M123_03-Apr_1b	98.91304348	98.91304348	magic
M123	1b	3	4	3-Apr	2016		4	30	30	184	184	0	249	2	3	2	M123_03-Apr_1b	1.086956522	1.086956522	magic
M123	2	11	11	11-Nov	2016	4/1/2017	13	42	42	148	148	0	252	2	1	0	M123_11-Nov_2	0	0	magic
M123	2	11	11	11-Nov	2016	4/1/2017	13	42	42	148	148	0	252	2	2	141	M123_11-Nov_2	95.27027027	95.27027027	magic
M123	2	11	11	11-Nov	2016	4/1/2017	13	42	42	148	148	0	252	2	3	7	M123_11-Nov_2	4.72972973	4.72972973	magic
M123	2	11	11	11-Nov	2016	4/1/2017	13	42	42	148	148	0	252	2	4	0	M123_11-Nov_2	0	0	magic
M123	3	11	11	11-Nov	2016	4/1/2017	13	42	42	144	146	2	253	3	1	0	M123_11-Nov_3	0	0	magic
M123	3	11	11	11-Nov	2016	4/1/2017	13	42	42	144	146	2	253	3	2	116	M123_11-Nov_3	79.45205479	80.55555556	magic
M123	3	11	11	11-Nov	2016	4/1/2017	13	42	42	144	146	2	253	3	3	28	M123_11-Nov_3	19.17808219	19.44444444	magic
M123	3	11	11	11-Nov	2016	4/1/2017	13	42	42	144	146	2	253	3	4	0	M123_11-Nov_3	0	0	magic
M123	3b	3	4	3-Apr	2016		4	27	30	180	181	1	250	3	1	0	M123_03-Apr_3b	0	0	magic
M123	3b	3	4	3-Apr	2016		4	27	30	180	181	1	250	3	2	167	M123_03-Apr_3b	92.26519337	92.77777778	magic
M123	3b	3	4	3-Apr	2016		4	27	30	180	181	1	250	3	3	13	M123_03-Apr_3b	7.182320442	7.222222222	magic
M124	1a	19	4	19-Apr	2016		4	33	34	154	155	1	257	4	1	0	M124_19-Apr_1a	0	0	magic
M124	1a	19	4	19-Apr	2016		4	33	34	154	155	1	257	4	2	64	M124_19-Apr_1a	41.29032258	41.55844156	magic
M124	1a	19	4	19-Apr	2016		4	33	34	154	155	1	257	4	3	89	M124_19-Apr_1a	57.41935484	57.79220779	magic
M124	1a	19	4	19-Apr	2016		4	33	34	154	155	1	257	4	4	1	M124_19-Apr_1a	0.64516129	0.649350649	magic
M124	1b	1	4	1-Apr	2016		4	33	34	184	189	5	256	3	1	0	M124_01-Apr_1b	0	0	magic
M124	1b	1	4	1-Apr	2016		4	33	34	184	189	5	256	3	2	136	M124_01-Apr_1b	71.95767196	73.91304348	magic
M124	1b	1	4	1-Apr	2016		4	33	34	184	189	5	256	3	3	47	M124_01-Apr_1b	24.86772487	25.54347826	magic
M124	1b	1	4	1-Apr	2016		4	33	34	184	189	5	256	3	4	1	M124_01-Apr_1b	0.529100529	0.543478261	magic
M124	3a	1	4	1-Apr	2016		4	33	34	196	197	1	255	2	1	0	M124_01-Apr_3a	0	0	magic
M124	3a	1	4	1-Apr	2016		4	33	34	196	197	1	255	2	2	114	M124_01-Apr_3a	57.8680203	58.16326531	magic
M124	3a	1	4	1-Apr	2016		4	33	34	196	197	1	255	2	3	73	M124_01-Apr_3a	37.05583756	37.24489796	magic
M124	3a	1	4	1-Apr	2016		4	33	34	196	197	1	255	2	4	9	M124_01-Apr_3a	4.568527919	4.591836735	magic
M124	3b	1	4	1-Apr	2016		4	36	34	205	205	0	254	1	1	0	M124_01-Apr_3b	0	0	magic
M124	3b	1	4	1-Apr	2016		4	36	34	205	205	0	254	1	2	99	M124_01-Apr_3b	48.29268293	48.29268293	magic
M124	3b	1	4	1-Apr	2016		4	36	34	205	205	0	254	1	3	103	M124_01-Apr_3b	50.24390244	50.24390244	magic
M124	3b	1	4	1-Apr	2016		4	36	34	205	205	0	254	1	4	3	M124_01-Apr_3b	1.463414634	1.463414634	magic
M127	1a	1	4	1-Apr	2016		4	33	34	181	202	21	258	1	1	0	M127_01-Apr_1a	0	0	magic
M127	1a	1	4	1-Apr	2016		4	33	34	181	202	21	258	1	2	30	M127_01-Apr_1a	14.85148515	16.57458564	magic
M127	1a	1	4	1-Apr	2016		4	33	34	181	202	21	258	1	3	64	M127_01-Apr_1a	31.68316832	35.35911602	magic
M127	1a	1	4	1-Apr	2016		4	33	34	181	202	21	258	1	4	42	M127_01-Apr_1a	20.79207921	23.20441989	magic
M127	1a	1	4	1-Apr	2016		4	33	34	181	202	21	258	1	5	32	M127_01-Apr_1a	15.84158416	17.67955801	magic
M127	1a	1	4	1-Apr	2016		4	33	34	181	202	21	258	1	6	8	M127_01-Apr_1a	3.96039604	4.419889503	magic
M127	1a	1	4	1-Apr	2016		4	33	34	181	202	21	258	1	7	4	M127_01-Apr_1a	1.98019802	2.209944751	magic
M127	1a	1	4	1-Apr	2016		4	33	34	181	202	21	258	1	8	1	M127_01-Apr_1a	0.495049505	0.552486188	magic
M127	1a	1	4	1-Apr	2016		4	33	34	181	202	21	258	1	9	0	M127_01-Apr_1a	0	0	magic
M127	1a	1	4	1-Apr	2016		4	33	34	181	202	21	258	1	10	0	M127_01-Apr_1a	0	0	magic
M127	1a	1	4	1-Apr	2016		4	33	34	181	202	21	258	1	11	0	M127_01-Apr_1a	0	0	magic
M127	1a	1	4	1-Apr	2016		4	33	34	181	202	21	258	1	12	0	M127_01-Apr_1a	0	0	magic
M127	1a_2	1	4	1-Apr	2016		4	36	34	146	192	46	260	3	1	0	M127_01-Apr_1a_2	0	0	magic
M127	1a_2	1	4	1-Apr	2016		4	36	34	146	192	46	260	3	2	21	M127_01-Apr_1a_2	10.9375	14.38356164	magic
M127	1a_2	1	4	1-Apr	2016		4	36	34	146	192	46	260	3	3	50	M127_01-Apr_1a_2	26.04166667	34.24657534	magic
M127	1a_2	1	4	1-Apr	2016		4	36	34	146	192	46	260	3	4	37	M127_01-Apr_1a_2	19.27083333	25.34246575	magic
M127	1a_2	1	4	1-Apr	2016		4	36	34	146	192	46	260	3	5	28	M127_01-Apr_1a_2	14.58333333	19.17808219	magic
M127	1a_2	1	4	1-Apr	2016		4	36	34	146	192	46	260	3	6	7	M127_01-Apr_1a_2	3.645833333	4.794520548	magic
M127	1a_2	1	4	1-Apr	2016		4	36	34	146	192	46	260	3	7	3	M127_01-Apr_1a_2	1.5625	2.054794521	magic
M127	1a_2	1	4	1-Apr	2016		4	36	34	146	192	46	260	3	8	0	M127_01-Apr_1a_2	0	0	magic
M127	1a_2	1	4	1-Apr	2016		4	36	34	146	192	46	260	3	9	0	M127_01-Apr_1a_2	0	0	magic
M127	1a_2	1	4	1-Apr	2016		4	36	34	146	192	46	260	3	10	0	M127_01-Apr_1a_2	0	0	magic
M127	1a_2	1	4	1-Apr	2016		4	36	34	146	192	46	260	3	11	0	M127_01-Apr_1a_2	0	0	magic
M127	1a_2	1	4	1-Apr	2016		4	36	34	146	192	46	260	3	12	0	M127_01-Apr_1a_2	0	0	magic
M127	3a	1	4	1-Apr	2016		4	33	34	146	182	36	259	2	1	0	M127_01-Apr_3a	0	0	magic
M127	3a	1	4	1-Apr	2016		4	33	34	146	182	36	259	2	2	36	M127_01-Apr_3a	19.78021978	24.65753425	magic
M127	3a	1	4	1-Apr	2016		4	33	34	146	182	36	259	2	3	48	M127_01-Apr_3a	26.37362637	32.87671233	magic
M127	3a	1	4	1-Apr	2016		4	33	34	146	182	36	259	2	4	25	M127_01-Apr_3a	13.73626374	17.12328767	magic
M127	3a	1	4	1-Apr	2016		4	33	34	146	182	36	259	2	5	20	M127_01-Apr_3a	10.98901099	13.69863014	magic
M127	3a	1	4	1-Apr	2016		4	33	34	146	182	36	259	2	6	10	M127_01-Apr_3a	5.494505495	6.849315068	magic
M127	3a	1	4	1-Apr	2016		4	33	34	146	182	36	259	2	7	4	M127_01-Apr_3a	2.197802198	2.739726027	magic
M127	3a	1	4	1-Apr	2016		4	33	34	146	182	36	259	2	8	2	M127_01-Apr_3a	1.098901099	1.369863014	magic
M127	3a	1	4	1-Apr	2016		4	33	34	146	182	36	259	2	9	0	M127_01-Apr_3a	0	0	magic
M127	3a	1	4	1-Apr	2016		4	33	34	146	182	36	259	2	10	0	M127_01-Apr_3a	0	0	magic
M127	3a	1	4	1-Apr	2016		4	33	34	146	182	36	259	2	11	0	M127_01-Apr_3a	0	0	magic
M127	3a	1	4	1-Apr	2016		4	33	34	146	182	36	259	2	12	1	M127_01-Apr_3a	0.549450549	0.684931507	magic
M128	1a	10	3	10-Mar	2016		4	24	25	155	158	3	269	3	1	0	M128_10-Mar_1a	0	0	magic
M128	1a	10	3	10-Mar	2016		4	24	25	155	158	3	269	3	2	8	M128_10-Mar_1a	5.063291139	5.161290323	magic
M128	1a	10	3	10-Mar	2016		4	24	25	155	158	3	269	3	3	133	M128_10-Mar_1a	84.17721519	85.80645161	magic
M128	1a	10	3	10-Mar	2016		4	24	25	155	158	3	269	3	4	14	M128_10-Mar_1a	8.860759494	9.032258065	magic
M128	1b	10	3	10-Mar	2016		4	24	25	151	151	0	267	1	1	0	M128_10-Mar_1b	0	0	magic
M128	1b	10	3	10-Mar	2016		4	24	25	151	151	0	267	1	2	36	M128_10-Mar_1b	23.8410596	23.8410596	magic
M128	1b	10	3	10-Mar	2016		4	24	25	151	151	0	267	1	3	113	M128_10-Mar_1b	74.83443709	74.83443709	magic
M128	1b	10	3	10-Mar	2016		4	24	25	151	151	0	267	1	4	2	M128_10-Mar_1b	1.324503311	1.324503311	magic
M128	2a	10	3	10-Mar	2016		4	27	25	151	153	2	268	2	1	0	M128_10-Mar_2a	0	0	magic
M128	2a	10	3	10-Mar	2016		4	27	25	151	153	2	268	2	2	5	M128_10-Mar_2a	3.267973856	3.311258278	magic
M128	2a	10	3	10-Mar	2016		4	27	25	151	153	2	268	2	3	146	M128_10-Mar_2a	95.4248366	96.68874172	magic
M128	2a	10	3	10-Mar	2016		4	27	25	151	153	2	268	2	4	0	M128_10-Mar_2a	0	0	magic
M129	1a	3	4	3-Apr	2016		4	30	30	154	170	16	272	3	1	0	M129_03-Apr_1a	0	0	magic
M129	1a	3	4	3-Apr	2016		4	30	30	154	170	16	272	3	2	78	M129_03-Apr_1a	45.88235294	50.64935065	magic
M129	1a	3	4	3-Apr	2016		4	30	30	154	170	16	272	3	3	53	M129_03-Apr_1a	31.17647059	34.41558442	magic
M129	1a	3	4	3-Apr	2016		4	30	30	154	170	16	272	3	4	11	M129_03-Apr_1a	6.470588235	7.142857143	magic
M129	1a	3	4	3-Apr	2016		4	30	30	154	170	16	272	3	5	7	M129_03-Apr_1a	4.117647059	4.545454545	magic
M129	1a	3	4	3-Apr	2016		4	30	30	154	170	16	272	3	6	2	M129_03-Apr_1a	1.176470588	1.298701299	magic
M129	1a	3	4	3-Apr	2016		4	30	30	154	170	16	272	3	7	2	M129_03-Apr_1a	1.176470588	1.298701299	magic
M129	1a	3	4	3-Apr	2016		4	30	30	154	170	16	272	3	8	1	M129_03-Apr_1a	0.588235294	0.649350649	magic
M129	2a	3	4	3-Apr	2016		4	30	30	186	189	3	271	2	1	0	M129_03-Apr_2a	0	0	magic
M129	2a	3	4	3-Apr	2016		4	30	30	186	189	3	271	2	2	119	M129_03-Apr_2a	62.96296296	63.97849462	magic
M129	2a	3	4	3-Apr	2016		4	30	30	186	189	3	271	2	3	62	M129_03-Apr_2a	32.8042328	33.33333333	magic
M129	2a	3	4	3-Apr	2016		4	30	30	186	189	3	271	2	4	4	M129_03-Apr_2a	2.116402116	2.150537634	magic
M129	2a	3	4	3-Apr	2016		4	30	30	186	189	3	271	2	5	1	M129_03-Apr_2a	0.529100529	0.537634409	magic
M129	2a	3	4	3-Apr	2016		4	30	30	186	189	3	271	2	6	0	M129_03-Apr_2a	0	0	magic
M129	2a	3	4	3-Apr	2016		4	30	30	186	189	3	271	2	7	0	M129_03-Apr_2a	0	0	magic
M129	2a	3	4	3-Apr	2016		4	30	30	186	189	3	271	2	8	0	M129_03-Apr_2a	0	0	magic
M129	3b	3	4	3-Apr	2016		4	30	30	165	167	2	270	1	1	0	M129_03-Apr_3b	0	0	magic
M129	3b	3	4	3-Apr	2016		4	30	30	165	167	2	270	1	2	108	M129_03-Apr_3b	64.67065868	65.45454545	magic
M129	3b	3	4	3-Apr	2016		4	30	30	165	167	2	270	1	3	49	M129_03-Apr_3b	29.34131737	29.6969697	magic
M129	3b	3	4	3-Apr	2016		4	30	30	165	167	2	270	1	4	5	M129_03-Apr_3b	2.994011976	3.03030303	magic
M129	3b	3	4	3-Apr	2016		4	30	30	165	167	2	270	1	5	3	M129_03-Apr_3b	1.796407186	1.818181818	magic
M129	3b	3	4	3-Apr	2016		4	30	30	165	167	2	270	1	6	0	M129_03-Apr_3b	0	0	magic
M129	3b	3	4	3-Apr	2016		4	30	30	165	167	2	270	1	7	0	M129_03-Apr_3b	0	0	magic
M129	3b	3	4	3-Apr	2016		4	30	30	165	167	2	270	1	8	0	M129_03-Apr_3b	0	0	magic
M131	3a-1	3	4	3-Apr	2016		4	30	30	86	173	87	274	2	1	0	M131_03-Apr_3a-1	0	0	magic
M131	3a-1	3	4	3-Apr	2016		4	30	30	86	173	87	274	2	2	2	M131_03-Apr_3a-1	1.156069364	2.325581395	magic
M131	3a-1	3	4	3-Apr	2016		4	30	30	86	173	87	274	2	3	16	M131_03-Apr_3a-1	9.248554913	18.60465116	magic
M131	3a-1	3	4	3-Apr	2016		4	30	30	86	173	87	274	2	4	19	M131_03-Apr_3a-1	10.98265896	22.09302326	magic
M131	3a-1	3	4	3-Apr	2016		4	30	30	86	173	87	274	2	5	24	M131_03-Apr_3a-1	13.87283237	27.90697674	magic
M131	3a-1	3	4	3-Apr	2016		4	30	30	86	173	87	274	2	6	15	M131_03-Apr_3a-1	8.670520231	17.44186047	magic
M131	3a-1	3	4	3-Apr	2016		4	30	30	86	173	87	274	2	7	6	M131_03-Apr_3a-1	3.468208092	6.976744186	magic
M131	3a-1	3	4	3-Apr	2016		4	30	30	86	173	87	274	2	8	4	M131_03-Apr_3a-1	2.312138728	4.651162791	magic
M131	3a-1	3	4	3-Apr	2016		4	30	30	86	173	87	274	2	9	0	M131_03-Apr_3a-1	0	0	magic
M131	3a-1	3	4	3-Apr	2016		4	30	30	86	173	87	274	2	10	0	M131_03-Apr_3a-1	0	0	magic
M131	3a-1	3	4	3-Apr	2016		4	30	30	86	173	87	274	2	11	0	M131_03-Apr_3a-1	0	0	magic
M131	3a-2	3	4	3-Apr	2016		4	30	30	130	177	47	273	1	1	0	M131_03-Apr_3a-2	0	0	magic
M131	3a-2	3	4	3-Apr	2016		4	30	30	130	177	47	273	1	2	17	M131_03-Apr_3a-2	9.604519774	13.07692308	magic
M131	3a-2	3	4	3-Apr	2016		4	30	30	130	177	47	273	1	3	49	M131_03-Apr_3a-2	27.68361582	37.69230769	magic
M131	3a-2	3	4	3-Apr	2016		4	30	30	130	177	47	273	1	4	41	M131_03-Apr_3a-2	23.16384181	31.53846154	magic
M131	3a-2	3	4	3-Apr	2016		4	30	30	130	177	47	273	1	5	17	M131_03-Apr_3a-2	9.604519774	13.07692308	magic
M131	3a-2	3	4	3-Apr	2016		4	30	30	130	177	47	273	1	6	4	M131_03-Apr_3a-2	2.259887006	3.076923077	magic
M131	3a-2	3	4	3-Apr	2016		4	30	30	130	177	47	273	1	7	2	M131_03-Apr_3a-2	1.129943503	1.538461538	magic
M131	3a-2	3	4	3-Apr	2016		4	30	30	130	177	47	273	1	8	0	M131_03-Apr_3a-2	0	0	magic
M131	3a-2	3	4	3-Apr	2016		4	30	30	130	177	47	273	1	9	0	M131_03-Apr_3a-2	0	0	magic
M131	3a-2	3	4	3-Apr	2016		4	30	30	130	177	47	273	1	10	0	M131_03-Apr_3a-2	0	0	magic
M131	3a-2	3	4	3-Apr	2016		4	30	30	130	177	47	273	1	11	0	M131_03-Apr_3a-2	0	0	magic
M131	3b	3	4	3-Apr	2016		4	30	30	25	169	144	275	3	1	0	M131_03-Apr_3b	0	0	magic
M131	3b	3	4	3-Apr	2016		4	30	30	25	169	144	275	3	2	1	M131_03-Apr_3b	0.591715976	4	magic
M131	3b	3	4	3-Apr	2016		4	30	30	25	169	144	275	3	3	0	M131_03-Apr_3b	0	0	magic
M131	3b	3	4	3-Apr	2016		4	30	30	25	169	144	275	3	4	5	M131_03-Apr_3b	2.958579882	20	magic
M131	3b	3	4	3-Apr	2016		4	30	30	25	169	144	275	3	5	10	M131_03-Apr_3b	5.917159763	40	magic
M131	3b	3	4	3-Apr	2016		4	30	30	25	169	144	275	3	6	6	M131_03-Apr_3b	3.550295858	24	magic
M131	3b	3	4	3-Apr	2016		4	30	30	25	169	144	275	3	7	1	M131_03-Apr_3b	0.591715976	4	magic
M131	3b	3	4	3-Apr	2016		4	30	30	25	169	144	275	3	8	0	M131_03-Apr_3b	0	0	magic
M131	3b	3	4	3-Apr	2016		4	30	30	25	169	144	275	3	9	1	M131_03-Apr_3b	0.591715976	4	magic
M131	3b	3	4	3-Apr	2016		4	30	30	25	169	144	275	3	10	0	M131_03-Apr_3b	0	0	magic
M131	3b	3	4	3-Apr	2016		4	30	30	25	169	144	275	3	11	1	M131_03-Apr_3b	0.591715976	4	magic
M135	2a	14	3	14-Mar	2016		4	24	24	161	163	2	278	3	1	0	M135_14-Mar_2a	0	0	magic
M135	2a	14	3	14-Mar	2016		4	24	24	161	163	2	278	3	2	129	M135_14-Mar_2a	79.14110429	80.1242236	magic
M135	2a	14	3	14-Mar	2016		4	24	24	161	163	2	278	3	3	27	M135_14-Mar_2a	16.56441718	16.77018634	magic
M135	2a	14	3	14-Mar	2016		4	24	24	161	163	2	278	3	4	0	M135_14-Mar_2a	0	0	magic
M135	2a	14	3	14-Mar	2016		4	24	24	161	163	2	278	3	5	3	M135_14-Mar_2a	1.840490798	1.863354037	magic
M135	2a	14	3	14-Mar	2016		4	24	24	161	163	2	278	3	6	2	M135_14-Mar_2a	1.226993865	1.242236025	magic
M135	2b	14	3	14-Mar	2016		4	28	24	169	169	0	276	1	1	0	M135_14-Mar_2b	0	0	magic
M135	2b	14	3	14-Mar	2016		4	28	24	169	169	0	276	1	2	159	M135_14-Mar_2b	94.08284024	94.08284024	magic
M135	2b	14	3	14-Mar	2016		4	28	24	169	169	0	276	1	3	10	M135_14-Mar_2b	5.917159763	5.917159763	magic
M135	2b	14	3	14-Mar	2016		4	28	24	169	169	0	276	1	4	0	M135_14-Mar_2b	0	0	magic
M135	2b	14	3	14-Mar	2016		4	28	24	169	169	0	276	1	5	0	M135_14-Mar_2b	0	0	magic
M135	2b	14	3	14-Mar	2016		4	28	24	169	169	0	276	1	6	0	M135_14-Mar_2b	0	0	magic
M135	3b	14	3	14-Mar	2016		4	21	24	153	153	0	277	2	1	0	M135_14-Mar_3b	0	0	magic
M135	3b	14	3	14-Mar	2016		4	21	24	153	153	0	277	2	2	119	M135_14-Mar_3b	77.77777778	77.77777778	magic
M135	3b	14	3	14-Mar	2016		4	21	24	153	153	0	277	2	3	34	M135_14-Mar_3b	22.22222222	22.22222222	magic
M135	3b	14	3	14-Mar	2016		4	21	24	153	153	0	277	2	4	0	M135_14-Mar_3b	0	0	magic
M135	3b	14	3	14-Mar	2016		4	21	24	153	153	0	277	2	5	0	M135_14-Mar_3b	0	0	magic
M135	3b	14	3	14-Mar	2016		4	21	24	153	153	0	277	2	6	0	M135_14-Mar_3b	0	0	magic
M138	1b	30	3	30-Mar	2016		5	33	32	247	250	3	280	2	1	0	M138_30-Mar_1b	0	0	magic
M138	1b	30	3	30-Mar	2016		5	33	32	247	250	3	280	2	2	44	M138_30-Mar_1b	17.6	17.81376518	magic
M138	1b	30	3	30-Mar	2016		5	33	32	247	250	3	280	2	3	192	M138_30-Mar_1b	76.8	77.73279352	magic
M138	1b	30	3	30-Mar	2016		5	33	32	247	250	3	280	2	4	9	M138_30-Mar_1b	3.6	3.643724696	magic
M138	1b	30	3	30-Mar	2016		5	33	32	247	250	3	280	2	5	2	M138_30-Mar_1b	0.8	0.809716599	magic
M138	1b	30	3	30-Mar	2016		5	33	32	247	250	3	280	2	6	0	M138_30-Mar_1b	0	0	magic
M138	1b	30	3	30-Mar	2016		5	33	32	247	250	3	280	2	7	0	M138_30-Mar_1b	0	0	magic
M138	2b	30	3	30-Mar	2016		5	30	32	198	210	12	281	3	1	0	M138_30-Mar_2b	0	0	magic
M138	2b	30	3	30-Mar	2016		5	30	32	198	210	12	281	3	2	28	M138_30-Mar_2b	13.33333333	14.14141414	magic
M138	2b	30	3	30-Mar	2016		5	30	32	198	210	12	281	3	3	137	M138_30-Mar_2b	65.23809524	69.19191919	magic
M138	2b	30	3	30-Mar	2016		5	30	32	198	210	12	281	3	4	16	M138_30-Mar_2b	7.619047619	8.080808081	magic
M138	2b	30	3	30-Mar	2016		5	30	32	198	210	12	281	3	5	7	M138_30-Mar_2b	3.333333333	3.535353535	magic
M138	2b	30	3	30-Mar	2016		5	30	32	198	210	12	281	3	6	5	M138_30-Mar_2b	2.380952381	2.525252525	magic
M138	2b	30	3	30-Mar	2016		5	30	32	198	210	12	281	3	7	5	M138_30-Mar_2b	2.380952381	2.525252525	magic
M138	3a	30	3	30-Mar	2016		5	33	32	216	218	2	279	1	1	0	M138_30-Mar_3a	0	0	magic
M138	3a	30	3	30-Mar	2016		5	33	32	216	218	2	279	1	2	38	M138_30-Mar_3a	17.43119266	17.59259259	magic
M138	3a	30	3	30-Mar	2016		5	33	32	216	218	2	279	1	3	150	M138_30-Mar_3a	68.80733945	69.44444444	magic
M138	3a	30	3	30-Mar	2016		5	33	32	216	218	2	279	1	4	25	M138_30-Mar_3a	11.46788991	11.57407407	magic
M138	3a	30	3	30-Mar	2016		5	33	32	216	218	2	279	1	5	3	M138_30-Mar_3a	1.376146789	1.388888889	magic
M138	3a	30	3	30-Mar	2016		5	33	32	216	218	2	279	1	6	0	M138_30-Mar_3a	0	0	magic
M138	3a	30	3	30-Mar	2016		5	33	32	216	218	2	279	1	7	0	M138_30-Mar_3a	0	0	magic
M139	1b	19	4	19-Apr	2016		5	33	32	158	163	5	284	3	1	0	M139_19-Apr_1b	0	0	magic
M139	1b	19	4	19-Apr	2016		5	33	32	158	163	5	284	3	2	10	M139_19-Apr_1b	6.134969325	6.329113924	magic
M139	1b	19	4	19-Apr	2016		5	33	32	158	163	5	284	3	3	0	M139_19-Apr_1b	0	0	magic
M139	1b	19	4	19-Apr	2016		5	33	32	158	163	5	284	3	4	138	M139_19-Apr_1b	84.66257669	87.34177215	magic
M139	1b	19	4	19-Apr	2016		5	33	32	158	163	5	284	3	5	4	M139_19-Apr_1b	2.45398773	2.53164557	magic
M139	1b	19	4	19-Apr	2016		5	33	32	158	163	5	284	3	6	4	M139_19-Apr_1b	2.45398773	2.53164557	magic
M139	1b	19	4	19-Apr	2016		5	33	32	158	163	5	284	3	7	2	M139_19-Apr_1b	1.226993865	1.265822785	magic
M139	2b	3	4	3-Apr	2016		5	30	32	184	187	3	283	2	1	0	M139_03-Apr_2b	0	0	magic
M139	2b	3	4	3-Apr	2016		5	30	32	184	187	3	283	2	2	31	M139_03-Apr_2b	16.57754011	16.84782609	magic
M139	2b	3	4	3-Apr	2016		5	30	32	184	187	3	283	2	3	111	M139_03-Apr_2b	59.35828877	60.32608696	magic
M139	2b	3	4	3-Apr	2016		5	30	32	184	187	3	283	2	4	39	M139_03-Apr_2b	20.85561497	21.19565217	magic
M139	2b	3	4	3-Apr	2016		5	30	32	184	187	3	283	2	5	1	M139_03-Apr_2b	0.534759358	0.543478261	magic
M139	2b	3	4	3-Apr	2016		5	30	32	184	187	3	283	2	6	1	M139_03-Apr_2b	0.534759358	0.543478261	magic
M139	2b	3	4	3-Apr	2016		5	30	32	184	187	3	283	2	7	1	M139_03-Apr_2b	0.534759358	0.543478261	magic
M139	3a	19	4	19-Apr	2016		5	33	32	160	167	7	285	4	1	0	M139_19-Apr_3a	0	0	magic
M139	3a	19	4	19-Apr	2016		5	33	32	160	167	7	285	4	2	11	M139_19-Apr_3a	6.586826347	6.875	magic
M139	3a	19	4	19-Apr	2016		5	33	32	160	167	7	285	4	3	0	M139_19-Apr_3a	0	0	magic
M139	3a	19	4	19-Apr	2016		5	33	32	160	167	7	285	4	4	138	M139_19-Apr_3a	82.63473054	86.25	magic
M139	3a	19	4	19-Apr	2016		5	33	32	160	167	7	285	4	5	8	M139_19-Apr_3a	4.790419162	5	magic
M139	3a	19	4	19-Apr	2016		5	33	32	160	167	7	285	4	6	2	M139_19-Apr_3a	1.19760479	1.25	magic
M139	3a	19	4	19-Apr	2016		5	33	32	160	167	7	285	4	7	1	M139_19-Apr_3a	0.598802395	0.625	magic
M139	3b	3	4	3-Apr	2016		5	30	32	174	175	1	282	1	1	0	M139_03-Apr_3b	0	0	magic
M139	3b	3	4	3-Apr	2016		5	30	32	174	175	1	282	1	2	17	M139_03-Apr_3b	9.714285714	9.770114943	magic
M139	3b	3	4	3-Apr	2016		5	30	32	174	175	1	282	1	3	77	M139_03-Apr_3b	44	44.25287356	magic
M139	3b	3	4	3-Apr	2016		5	30	32	174	175	1	282	1	4	68	M139_03-Apr_3b	38.85714286	39.08045977	magic
M139	3b	3	4	3-Apr	2016		5	30	32	174	175	1	282	1	5	8	M139_03-Apr_3b	4.571428571	4.597701149	magic
M139	3b	3	4	3-Apr	2016		5	30	32	174	175	1	282	1	6	4	M139_03-Apr_3b	2.285714286	2.298850575	magic
M139	3b	3	4	3-Apr	2016		5	30	32	174	175	1	282	1	7	0	M139_03-Apr_3b	0	0	magic
M14	1B	25	1	25-Jan	2016		1b	29	29	73	119	46	287	2	1	0	M14_25-Jan_1B	0	0	magic
M14	1B	25	1	25-Jan	2016		1b	29	29	73	119	46	287	2	2	4	M14_25-Jan_1B	3.361344538	5.479452055	magic
M14	1B	25	1	25-Jan	2016		1b	29	29	73	119	46	287	2	3	30	M14_25-Jan_1B	25.21008403	41.09589041	magic
M14	1B	25	1	25-Jan	2016		1b	29	29	73	119	46	287	2	4	32	M14_25-Jan_1B	26.8907563	43.83561644	magic
M14	1B	25	1	25-Jan	2016		1b	29	29	73	119	46	287	2	5	6	M14_25-Jan_1B	5.042016807	8.219178082	magic
M14	1B	25	1	25-Jan	2016		1b	29	29	73	119	46	287	2	6	1	M14_25-Jan_1B	0.840336134	1.369863014	magic
M14	1B	25	1	25-Jan	2016		1b	29	29	73	119	46	287	2	7	0	M14_25-Jan_1B	0	0	magic
M14	1B	8	2	8-Feb	2016		1b	43	43	36	119	83	293	4	1	0	M14_08-Feb_1B	0	0	magic
M14	1B	8	2	8-Feb	2016		1b	43	43	36	119	83	293	4	2	1	M14_08-Feb_1B	0.840336134	2.777777778	magic
M14	1B	8	2	8-Feb	2016		1b	43	43	36	119	83	293	4	3	13	M14_08-Feb_1B	10.92436975	36.11111111	magic
M14	1B	8	2	8-Feb	2016		1b	43	43	36	119	83	293	4	4	17	M14_08-Feb_1B	14.28571429	47.22222222	magic
M14	1B	8	2	8-Feb	2016		1b	43	43	36	119	83	293	4	5	3	M14_08-Feb_1B	2.521008403	8.333333333	magic
M14	1B	8	2	8-Feb	2016		1b	43	43	36	119	83	293	4	6	2	M14_08-Feb_1B	1.680672269	5.555555556	magic
M14	1B	8	2	8-Feb	2016		1b	43	43	36	119	83	293	4	7	0	M14_08-Feb_1B	0	0	magic
M14	1B	8	2	8-Feb	2016		1b	43	43	36	119	83	293	4	8	0	M14_08-Feb_1B	0	0	magic
M14	1B	8	2	8-Feb	2016		1b	43	43	36	119	83	293	4	9	0	M14_08-Feb_1B	0	0	magic
M14	1B	8	2	8-Feb	2016		1b	43	43	36	119	83	293	4	10	0	M14_08-Feb_1B	0	0	magic
M14	1B	8	2	8-Feb	2016		1b	43	43	36	119	83	293	4	11	0	M14_08-Feb_1B	0	0	magic
M14	1B	8	2	8-Feb	2016		1b	43	43	36	119	83	293	4	12	0	M14_08-Feb_1B	0	0	magic
M14	1B	8	2	8-Feb	2016		1b	43	43	36	119	83	293	4	13	0	M14_08-Feb_1B	0	0	magic
M14	1B	23	9	23-Sep	2015		1	44	44	5	128	123	301	2	1	0	M14_23-Sep_1B	0	0	magic
M14	1B	23	9	23-Sep	2015		1	44	44	5	128	123	301	2	2	0	M14_23-Sep_1B	0	0	magic
M14	1B	23	9	23-Sep	2015		1	44	44	5	128	123	301	2	3	2	M14_23-Sep_1B	1.5625	40	magic
M14	1B	23	9	23-Sep	2015		1	44	44	5	128	123	301	2	4	2	M14_23-Sep_1B	1.5625	40	magic
M14	1B	23	9	23-Sep	2015		1	44	44	5	128	123	301	2	5	1	M14_23-Sep_1B	0.78125	20	magic
M14	1B	23	9	23-Sep	2015		1	44	44	5	128	123	301	2	6	0	M14_23-Sep_1B	0	0	magic
M14	1B	23	9	23-Sep	2015		1	44	44	5	128	123	301	2	7	0	M14_23-Sep_1B	0	0	magic
M14	2A	25	1	25-Jan	2016		1b	29	29	63	112	49	289	4	1	0	M14_25-Jan_2A	0	0	magic
M14	2A	25	1	25-Jan	2016		1b	29	29	63	112	49	289	4	2	1	M14_25-Jan_2A	0.892857143	1.587301587	magic
M14	2A	25	1	25-Jan	2016		1b	29	29	63	112	49	289	4	3	27	M14_25-Jan_2A	24.10714286	42.85714286	magic
M14	2A	25	1	25-Jan	2016		1b	29	29	63	112	49	289	4	4	22	M14_25-Jan_2A	19.64285714	34.92063492	magic
M14	2A	25	1	25-Jan	2016		1b	29	29	63	112	49	289	4	5	9	M14_25-Jan_2A	8.035714286	14.28571429	magic
M14	2A	25	1	25-Jan	2016		1b	29	29	63	112	49	289	4	6	4	M14_25-Jan_2A	3.571428571	6.349206349	magic
M14	2A	25	1	25-Jan	2016		1b	29	29	63	112	49	289	4	7	1	M14_25-Jan_2A	0.892857143	1.587301587	magic
M14	2A	8	2	8-Feb	2016		1b	43	43	42	111	69	290	1	1	0	M14_08-Feb_2A	0	0	magic
M14	2A	8	2	8-Feb	2016		1b	43	43	42	111	69	290	1	2	5	M14_08-Feb_2A	4.504504505	11.9047619	magic
M14	2A	8	2	8-Feb	2016		1b	43	43	42	111	69	290	1	3	17	M14_08-Feb_2A	15.31531532	40.47619048	magic
M14	2A	8	2	8-Feb	2016		1b	43	43	42	111	69	290	1	4	11	M14_08-Feb_2A	9.90990991	26.19047619	magic
M14	2A	8	2	8-Feb	2016		1b	43	43	42	111	69	290	1	5	6	M14_08-Feb_2A	5.405405405	14.28571429	magic
M14	2A	8	2	8-Feb	2016		1b	43	43	42	111	69	290	1	6	2	M14_08-Feb_2A	1.801801802	4.761904762	magic
M14	2A	8	2	8-Feb	2016		1b	43	43	42	111	69	290	1	7	1	M14_08-Feb_2A	0.900900901	2.380952381	magic
M14	2A	8	2	8-Feb	2016		1b	43	43	42	111	69	290	1	8	0	M14_08-Feb_2A	0	0	magic
M14	2A	8	2	8-Feb	2016		1b	43	43	42	111	69	290	1	9	0	M14_08-Feb_2A	0	0	magic
M14	2A	8	2	8-Feb	2016		1b	43	43	42	111	69	290	1	10	0	M14_08-Feb_2A	0	0	magic
M14	2A	8	2	8-Feb	2016		1b	43	43	42	111	69	290	1	11	0	M14_08-Feb_2A	0	0	magic
M14	2A	8	2	8-Feb	2016		1b	43	43	42	111	69	290	1	12	0	M14_08-Feb_2A	0	0	magic
M14	2A	8	2	8-Feb	2016		1b	43	43	42	111	69	290	1	13	0	M14_08-Feb_2A	0	0	magic
M14	2B	25	1	25-Jan	2016		1b	29	29	69	116	47	288	3	1	0	M14_25-Jan_2B	0	0	magic
M14	2B	25	1	25-Jan	2016		1b	29	29	69	116	47	288	3	2	8	M14_25-Jan_2B	6.896551724	11.5942029	magic
M14	2B	25	1	25-Jan	2016		1b	29	29	69	116	47	288	3	3	21	M14_25-Jan_2B	18.10344828	30.43478261	magic
M14	2B	25	1	25-Jan	2016		1b	29	29	69	116	47	288	3	4	31	M14_25-Jan_2B	26.72413793	44.92753623	magic
M14	2B	25	1	25-Jan	2016		1b	29	29	69	116	47	288	3	5	8	M14_25-Jan_2B	6.896551724	11.5942029	magic
M14	2B	25	1	25-Jan	2016		1b	29	29	69	116	47	288	3	6	1	M14_25-Jan_2B	0.862068966	1.449275362	magic
M14	2B	25	1	25-Jan	2016		1b	29	29	69	116	47	288	3	7	0	M14_25-Jan_2B	0	0	magic
M14	2B	8	2	8-Feb	2016		1b	43	43	44	116	72	291	2	1	0	M14_08-Feb_2B	0	0	magic
M14	2B	8	2	8-Feb	2016		1b	43	43	44	116	72	291	2	2	2	M14_08-Feb_2B	1.724137931	4.545454545	magic
M14	2B	8	2	8-Feb	2016		1b	43	43	44	116	72	291	2	3	20	M14_08-Feb_2B	17.24137931	45.45454545	magic
M14	2B	8	2	8-Feb	2016		1b	43	43	44	116	72	291	2	4	11	M14_08-Feb_2B	9.482758621	25	magic
M14	2B	8	2	8-Feb	2016		1b	43	43	44	116	72	291	2	5	4	M14_08-Feb_2B	3.448275862	9.090909091	magic
M14	2B	8	2	8-Feb	2016		1b	43	43	44	116	72	291	2	6	5	M14_08-Feb_2B	4.310344828	11.36363636	magic
M14	2B	8	2	8-Feb	2016		1b	43	43	44	116	72	291	2	7	1	M14_08-Feb_2B	0.862068966	2.272727273	magic
M14	2B	8	2	8-Feb	2016		1b	43	43	44	116	72	291	2	8	0	M14_08-Feb_2B	0	0	magic
M14	2B	8	2	8-Feb	2016		1b	43	43	44	116	72	291	2	9	0	M14_08-Feb_2B	0	0	magic
M14	2B	8	2	8-Feb	2016		1b	43	43	44	116	72	291	2	10	0	M14_08-Feb_2B	0	0	magic
M14	2B	8	2	8-Feb	2016		1b	43	43	44	116	72	291	2	11	0	M14_08-Feb_2B	0	0	magic
M14	2B	8	2	8-Feb	2016		1b	43	43	44	116	72	291	2	12	0	M14_08-Feb_2B	0	0	magic
M14	2B	8	2	8-Feb	2016		1b	43	43	44	116	72	291	2	13	1	M14_08-Feb_2B	0.862068966	2.272727273	magic
M14	2B	23	9	23-Sep	2015		1	44	44	4	134	130	302	3	1	0	M14_23-Sep_2B	0	0	magic
M14	2B	23	9	23-Sep	2015		1	44	44	4	134	130	302	3	2	0	M14_23-Sep_2B	0	0	magic
M14	2B	23	9	23-Sep	2015		1	44	44	4	134	130	302	3	3	1	M14_23-Sep_2B	0.746268657	25	magic
M14	2B	23	9	23-Sep	2015		1	44	44	4	134	130	302	3	4	0	M14_23-Sep_2B	0	0	magic
M14	2B	23	9	23-Sep	2015		1	44	44	4	134	130	302	3	5	0	M14_23-Sep_2B	0	0	magic
M14	2B	23	9	23-Sep	2015		1	44	44	4	134	130	302	3	6	2	M14_23-Sep_2B	1.492537313	50	magic
M14	2B	23	9	23-Sep	2015		1	44	44	4	134	130	302	3	7	1	M14_23-Sep_2B	0.746268657	25	magic
M14	3A	25	1	25-Jan	2016		1b	29	29	74	115	41	286	1	1	0	M14_25-Jan_3A	0	0	magic
M14	3A	25	1	25-Jan	2016		1b	29	29	74	115	41	286	1	2	5	M14_25-Jan_3A	4.347826087	6.756756757	magic
M14	3A	25	1	25-Jan	2016		1b	29	29	74	115	41	286	1	3	27	M14_25-Jan_3A	23.47826087	36.48648649	magic
M14	3A	25	1	25-Jan	2016		1b	29	29	74	115	41	286	1	4	26	M14_25-Jan_3A	22.60869565	35.13513514	magic
M14	3A	25	1	25-Jan	2016		1b	29	29	74	115	41	286	1	5	11	M14_25-Jan_3A	9.565217391	14.86486486	magic
M14	3A	25	1	25-Jan	2016		1b	29	29	74	115	41	286	1	6	5	M14_25-Jan_3A	4.347826087	6.756756757	magic
M14	3A	25	1	25-Jan	2016		1b	29	29	74	115	41	286	1	7	1	M14_25-Jan_3A	0.869565217	1.351351351	magic
M14	3A	8	2	8-Feb	2016		1b	43	43	43	116	73	292	3	1	0	M14_08-Feb_3A	0	0	magic
M14	3A	8	2	8-Feb	2016		1b	43	43	43	116	73	292	3	2	5	M14_08-Feb_3A	4.310344828	11.62790698	magic
M14	3A	8	2	8-Feb	2016		1b	43	43	43	116	73	292	3	3	21	M14_08-Feb_3A	18.10344828	48.8372093	magic
M14	3A	8	2	8-Feb	2016		1b	43	43	43	116	73	292	3	4	9	M14_08-Feb_3A	7.75862069	20.93023256	magic
M14	3A	8	2	8-Feb	2016		1b	43	43	43	116	73	292	3	5	6	M14_08-Feb_3A	5.172413793	13.95348837	magic
M14	3A	8	2	8-Feb	2016		1b	43	43	43	116	73	292	3	6	2	M14_08-Feb_3A	1.724137931	4.651162791	magic
M14	3A	8	2	8-Feb	2016		1b	43	43	43	116	73	292	3	7	0	M14_08-Feb_3A	0	0	magic
M14	3A	8	2	8-Feb	2016		1b	43	43	43	116	73	292	3	8	0	M14_08-Feb_3A	0	0	magic
M14	3A	8	2	8-Feb	2016		1b	43	43	43	116	73	292	3	9	0	M14_08-Feb_3A	0	0	magic
M14	3A	8	2	8-Feb	2016		1b	43	43	43	116	73	292	3	10	0	M14_08-Feb_3A	0	0	magic
M14	3A	8	2	8-Feb	2016		1b	43	43	43	116	73	292	3	11	0	M14_08-Feb_3A	0	0	magic
M14	3A	8	2	8-Feb	2016		1b	43	43	43	116	73	292	3	12	0	M14_08-Feb_3A	0	0	magic
M14	3A	8	2	8-Feb	2016		1b	43	43	43	116	73	292	3	13	0	M14_08-Feb_3A	0	0	magic
M14	3B	23	9	23-Sep	2015		1	44	44	4	114	110	299	1	1	0	M14_23-Sep_3B	0	0	magic
M14	3B	23	9	23-Sep	2015		1	44	44	4	114	110	299	1	2	0	M14_23-Sep_3B	0	0	magic
M14	3B	23	9	23-Sep	2015		1	44	44	4	114	110	299	1	3	1	M14_23-Sep_3B	0.877192982	25	magic
M14	3B	23	9	23-Sep	2015		1	44	44	4	114	110	299	1	4	2	M14_23-Sep_3B	1.754385965	50	magic
M14	3B	23	9	23-Sep	2015		1	44	44	4	114	110	299	1	5	0	M14_23-Sep_3B	0	0	magic
M14	3B	23	9	23-Sep	2015		1	44	44	4	114	110	299	1	6	1	M14_23-Sep_3B	0.877192982	25	magic
M14	3B	23	9	23-Sep	2015		1	44	44	4	114	110	299	1	7	0	M14_23-Sep_3B	0	0	magic
M140	1a	13	4	13-Apr	2016		5	33	32	19	185	166	314	1	1	0	M140_13-Apr_1a	0	0	magic
M140	1a	13	4	13-Apr	2016		5	33	32	19	185	166	314	1	2	0	M140_13-Apr_1a	0	0	magic
M140	1a	13	4	13-Apr	2016		5	33	32	19	185	166	314	1	3	9	M140_13-Apr_1a	4.864864865	47.36842105	magic
M140	1a	13	4	13-Apr	2016		5	33	32	19	185	166	314	1	4	5	M140_13-Apr_1a	2.702702703	26.31578947	magic
M140	1a	13	4	13-Apr	2016		5	33	32	19	185	166	314	1	5	3	M140_13-Apr_1a	1.621621622	15.78947368	magic
M140	1a	13	4	13-Apr	2016		5	33	32	19	185	166	314	1	6	1	M140_13-Apr_1a	0.540540541	5.263157895	magic
M140	1a	13	4	13-Apr	2016		5	33	32	19	185	166	314	1	7	1	M140_13-Apr_1a	0.540540541	5.263157895	magic
M140	1a	13	4	13-Apr	2016		5	33	32	19	185	166	314	1	8	0	M140_13-Apr_1a	0	0	magic
M140	1a	13	4	13-Apr	2016		5	33	32	19	185	166	314	1	9	0	M140_13-Apr_1a	0	0	magic
M140	1a	13	4	13-Apr	2016		5	33	32	19	185	166	314	1	10	0	M140_13-Apr_1a	0	0	magic
M140	1A	8	9	8-Sep	2015		1	26	26	0	113	113	321	1	1	0	M140_08-Sep_1A	0	NA	magic
M140	1A	8	9	8-Sep	2015		1	26	26	0	113	113	321	1	2	0	M140_08-Sep_1A	0	NA	magic
M140	1A	8	9	8-Sep	2015		1	26	26	0	113	113	321	1	3	0	M140_08-Sep_1A	0	NA	magic
M140	1A	8	9	8-Sep	2015		1	26	26	0	113	113	321	1	4	0	M140_08-Sep_1A	0	NA	magic
M140	1A	8	9	8-Sep	2015		1	26	26	0	113	113	321	1	5	0	M140_08-Sep_1A	0	NA	magic
M140	1A	24	9	24-Sep	2015		1	42	42	0	120	120	330	2	1	0	M140_24-Sep_1A	0	NA	magic
M140	1A	24	9	24-Sep	2015		1	42	42	0	120	120	330	2	2	0	M140_24-Sep_1A	0	NA	magic
M140	1A	24	9	24-Sep	2015		1	42	42	0	120	120	330	2	3	0	M140_24-Sep_1A	0	NA	magic
M140	1A	24	9	24-Sep	2015		1	42	42	0	120	120	330	2	4	0	M140_24-Sep_1A	0	NA	magic
M140	1A	24	9	24-Sep	2015		1	42	42	0	120	120	330	2	5	0	M140_24-Sep_1A	0	NA	magic
M140	1A	24	9	24-Sep	2015		1	42	42	0	120	120	330	2	6	0	M140_24-Sep_1A	0	NA	magic
M140	1A	24	9	24-Sep	2015		1	42	42	0	120	120	330	2	7	0	M140_24-Sep_1A	0	NA	magic
M140	1A	24	9	24-Sep	2015		1	42	42	0	120	120	330	2	8	0	M140_24-Sep_1A	0	NA	magic
M140	1A	24	9	24-Sep	2015		1	42	42	0	120	120	330	2	9	0	M140_24-Sep_1A	0	NA	magic
M140	1A	24	9	24-Sep	2015		1	42	42	0	120	120	330	2	10	0	M140_24-Sep_1A	0	NA	magic
M140	1A	24	9	24-Sep	2015		1	42	42	0	120	120	330	2	11	0	M140_24-Sep_1A	0	NA	magic
M140	2A	8	9	8-Sep	2015		1	26	26	0	121	121	324	2	1	0	M140_08-Sep_2A	0	NA	magic
M140	2A	8	9	8-Sep	2015		1	26	26	0	121	121	324	2	2	0	M140_08-Sep_2A	0	NA	magic
M140	2A	8	9	8-Sep	2015		1	26	26	0	121	121	324	2	3	0	M140_08-Sep_2A	0	NA	magic
M140	2A	8	9	8-Sep	2015		1	26	26	0	121	121	324	2	4	0	M140_08-Sep_2A	0	NA	magic
M140	2A	8	9	8-Sep	2015		1	26	26	0	121	121	324	2	5	0	M140_08-Sep_2A	0	NA	magic
M140	2A	25	1	25-Jan	2016		1b	27	30	8	129	121	311	2	1	0	M140_25-Jan_2A	0	0	magic
M140	2A	25	1	25-Jan	2016		1b	27	30	8	129	121	311	2	2	0	M140_25-Jan_2A	0	0	magic
M140	2A	25	1	25-Jan	2016		1b	27	30	8	129	121	311	2	3	0	M140_25-Jan_2A	0	0	magic
M140	2A	25	1	25-Jan	2016		1b	27	30	8	129	121	311	2	4	2	M140_25-Jan_2A	1.550387597	25	magic
M140	2A	25	1	25-Jan	2016		1b	27	30	8	129	121	311	2	5	1	M140_25-Jan_2A	0.775193798	12.5	magic
M140	2A	25	1	25-Jan	2016		1b	27	30	8	129	121	311	2	6	2	M140_25-Jan_2A	1.550387597	25	magic
M140	2A	25	1	25-Jan	2016		1b	27	30	8	129	121	311	2	7	1	M140_25-Jan_2A	0.775193798	12.5	magic
M140	2A	25	1	25-Jan	2016		1b	27	30	8	129	121	311	2	8	2	M140_25-Jan_2A	1.550387597	25	magic
M140	2A	8	2	8-Feb	2016		1b	41	44	8	127	119	313	2	1	0	M140_08-Feb_2A	0	0	magic
M140	2A	8	2	8-Feb	2016		1b	41	44	8	127	119	313	2	2	1	M140_08-Feb_2A	0.787401575	12.5	magic
M140	2A	8	2	8-Feb	2016		1b	41	44	8	127	119	313	2	3	1	M140_08-Feb_2A	0.787401575	12.5	magic
M140	2A	8	2	8-Feb	2016		1b	41	44	8	127	119	313	2	4	0	M140_08-Feb_2A	0	0	magic
M140	2A	8	2	8-Feb	2016		1b	41	44	8	127	119	313	2	5	1	M140_08-Feb_2A	0.787401575	12.5	magic
M140	2A	8	2	8-Feb	2016		1b	41	44	8	127	119	313	2	6	2	M140_08-Feb_2A	1.57480315	25	magic
M140	2A	8	2	8-Feb	2016		1b	41	44	8	127	119	313	2	7	0	M140_08-Feb_2A	0	0	magic
M140	2A	8	2	8-Feb	2016		1b	41	44	8	127	119	313	2	8	1	M140_08-Feb_2A	0.787401575	12.5	magic
M140	2A	8	2	8-Feb	2016		1b	41	44	8	127	119	313	2	9	0	M140_08-Feb_2A	0	0	magic
M140	2A	8	2	8-Feb	2016		1b	41	44	8	127	119	313	2	10	1	M140_08-Feb_2A	0.787401575	12.5	magic
M140	2A	8	2	8-Feb	2016		1b	41	44	8	127	119	313	2	11	0	M140_08-Feb_2A	0	0	magic
M140	2A	8	2	8-Feb	2016		1b	41	44	8	127	119	313	2	12	0	M140_08-Feb_2A	0	0	magic
M140	2A	8	2	8-Feb	2016		1b	41	44	8	127	119	313	2	13	0	M140_08-Feb_2A	0	0	magic
M140	2A	8	2	8-Feb	2016		1b	41	44	8	127	119	313	2	14	1	M140_08-Feb_2A	0.787401575	12.5	magic
M140	2A	24	9	24-Sep	2015		1	42	42	0	120	120	331	3	1	0	M140_24-Sep_2A	0	NA	magic
M140	2A	24	9	24-Sep	2015		1	42	42	0	120	120	331	3	2	0	M140_24-Sep_2A	0	NA	magic
M140	2A	24	9	24-Sep	2015		1	42	42	0	120	120	331	3	3	0	M140_24-Sep_2A	0	NA	magic
M140	2A	24	9	24-Sep	2015		1	42	42	0	120	120	331	3	4	0	M140_24-Sep_2A	0	NA	magic
M140	2A	24	9	24-Sep	2015		1	42	42	0	120	120	331	3	5	0	M140_24-Sep_2A	0	NA	magic
M140	2A	24	9	24-Sep	2015		1	42	42	0	120	120	331	3	6	0	M140_24-Sep_2A	0	NA	magic
M140	2A	24	9	24-Sep	2015		1	42	42	0	120	120	331	3	7	0	M140_24-Sep_2A	0	NA	magic
M140	2A	24	9	24-Sep	2015		1	42	42	0	120	120	331	3	8	0	M140_24-Sep_2A	0	NA	magic
M140	2A	24	9	24-Sep	2015		1	42	42	0	120	120	331	3	9	0	M140_24-Sep_2A	0	NA	magic
M140	2A	24	9	24-Sep	2015		1	42	42	0	120	120	331	3	10	0	M140_24-Sep_2A	0	NA	magic
M140	2A	24	9	24-Sep	2015		1	42	42	0	120	120	331	3	11	0	M140_24-Sep_2A	0	NA	magic
M140	2B	25	1	25-Jan	2016		1b	33	30	8	129	121	310	1	1	0	M140_25-Jan_2B	0	0	magic
M140	2B	25	1	25-Jan	2016		1b	33	30	8	129	121	310	1	2	0	M140_25-Jan_2B	0	0	magic
M140	2B	25	1	25-Jan	2016		1b	33	30	8	129	121	310	1	3	0	M140_25-Jan_2B	0	0	magic
M140	2B	25	1	25-Jan	2016		1b	33	30	8	129	121	310	1	4	2	M140_25-Jan_2B	1.550387597	25	magic
M140	2B	25	1	25-Jan	2016		1b	33	30	8	129	121	310	1	5	0	M140_25-Jan_2B	0	0	magic
M140	2B	25	1	25-Jan	2016		1b	33	30	8	129	121	310	1	6	2	M140_25-Jan_2B	1.550387597	25	magic
M140	2B	25	1	25-Jan	2016		1b	33	30	8	129	121	310	1	7	3	M140_25-Jan_2B	2.325581395	37.5	magic
M140	2B	25	1	25-Jan	2016		1b	33	30	8	129	121	310	1	8	1	M140_25-Jan_2B	0.775193798	12.5	magic
M140	2B	8	2	8-Feb	2016		1b	47	44	8	116	108	312	1	1	0	M140_08-Feb_2B	0	0	magic
M140	2B	8	2	8-Feb	2016		1b	47	44	8	116	108	312	1	2	0	M140_08-Feb_2B	0	0	magic
M140	2B	8	2	8-Feb	2016		1b	47	44	8	116	108	312	1	3	0	M140_08-Feb_2B	0	0	magic
M140	2B	8	2	8-Feb	2016		1b	47	44	8	116	108	312	1	4	2	M140_08-Feb_2B	1.724137931	25	magic
M140	2B	8	2	8-Feb	2016		1b	47	44	8	116	108	312	1	5	1	M140_08-Feb_2B	0.862068966	12.5	magic
M140	2B	8	2	8-Feb	2016		1b	47	44	8	116	108	312	1	6	2	M140_08-Feb_2B	1.724137931	25	magic
M140	2B	8	2	8-Feb	2016		1b	47	44	8	116	108	312	1	7	1	M140_08-Feb_2B	0.862068966	12.5	magic
M140	2B	8	2	8-Feb	2016		1b	47	44	8	116	108	312	1	8	0	M140_08-Feb_2B	0	0	magic
M140	2B	8	2	8-Feb	2016		1b	47	44	8	116	108	312	1	9	0	M140_08-Feb_2B	0	0	magic
M140	2B	8	2	8-Feb	2016		1b	47	44	8	116	108	312	1	10	1	M140_08-Feb_2B	0.862068966	12.5	magic
M140	2B	8	2	8-Feb	2016		1b	47	44	8	116	108	312	1	11	1	M140_08-Feb_2B	0.862068966	12.5	magic
M140	2B	8	2	8-Feb	2016		1b	47	44	8	116	108	312	1	12	0	M140_08-Feb_2B	0	0	magic
M140	2B	8	2	8-Feb	2016		1b	47	44	8	116	108	312	1	13	0	M140_08-Feb_2B	0	0	magic
M140	2B	8	2	8-Feb	2016		1b	47	44	8	116	108	312	1	14	0	M140_08-Feb_2B	0	0	magic
M140	3	13	4	13-Apr	2016		5	33	32	2	186	184	316	3	1	0	M140_13-Apr_3	0	0	magic
M140	3	13	4	13-Apr	2016		5	33	32	2	186	184	316	3	2	0	M140_13-Apr_3	0	0	magic
M140	3	13	4	13-Apr	2016		5	33	32	2	186	184	316	3	3	1	M140_13-Apr_3	0.537634409	50	magic
M140	3	13	4	13-Apr	2016		5	33	32	2	186	184	316	3	4	0	M140_13-Apr_3	0	0	magic
M140	3	13	4	13-Apr	2016		5	33	32	2	186	184	316	3	5	0	M140_13-Apr_3	0	0	magic
M140	3	13	4	13-Apr	2016		5	33	32	2	186	184	316	3	6	0	M140_13-Apr_3	0	0	magic
M140	3	13	4	13-Apr	2016		5	33	32	2	186	184	316	3	7	0	M140_13-Apr_3	0	0	magic
M140	3	13	4	13-Apr	2016		5	33	32	2	186	184	316	3	8	0	M140_13-Apr_3	0	0	magic
M140	3	13	4	13-Apr	2016		5	33	32	2	186	184	316	3	9	0	M140_13-Apr_3	0	0	magic
M140	3	13	4	13-Apr	2016		5	33	32	2	186	184	316	3	10	1	M140_13-Apr_3	0.537634409	50	magic
M140	3A	8	9	8-Sep	2015		1	26	26	5	131	126	325	3	1	0	M140_08-Sep_3A	0	0	magic
M140	3A	8	9	8-Sep	2015		1	26	26	5	131	126	325	3	2	0	M140_08-Sep_3A	0	0	magic
M140	3A	8	9	8-Sep	2015		1	26	26	5	131	126	325	3	3	1	M140_08-Sep_3A	0.763358779	20	magic
M140	3A	8	9	8-Sep	2015		1	26	26	5	131	126	325	3	4	0	M140_08-Sep_3A	0	0	magic
M140	3A	8	9	8-Sep	2015		1	26	26	5	131	126	325	3	5	0	M140_08-Sep_3A	0	0	magic
M140	3A	8	9	8-Sep	2015		1	26	26	5	131	126	325	3	6	0	M140_08-Sep_3A	0	0	magic
M140	3A	8	9	8-Sep	2015		1	26	26	5	131	126	325	3	7	2	M140_08-Sep_3A	1.526717557	40	magic
M140	3A	8	9	8-Sep	2015		1	26	26	5	131	126	325	3	8	1	M140_08-Sep_3A	0.763358779	20	magic
M140	3A	8	9	8-Sep	2015		1	26	26	5	131	126	325	3	9	1	M140_08-Sep_3A	0.763358779	20	magic
M140	3A	24	9	24-Sep	2015		1	42	42	6	118	112	326	1	1	0	M140_24-Sep_3A	0	0	magic
M140	3A	24	9	24-Sep	2015		1	42	42	6	118	112	326	1	2	0	M140_24-Sep_3A	0	0	magic
M140	3A	24	9	24-Sep	2015		1	42	42	6	118	112	326	1	3	0	M140_24-Sep_3A	0	0	magic
M140	3A	24	9	24-Sep	2015		1	42	42	6	118	112	326	1	4	1	M140_24-Sep_3A	0.847457627	16.66666667	magic
M140	3A	24	9	24-Sep	2015		1	42	42	6	118	112	326	1	5	0	M140_24-Sep_3A	0	0	magic
M140	3A	24	9	24-Sep	2015		1	42	42	6	118	112	326	1	6	2	M140_24-Sep_3A	1.694915254	33.33333333	magic
M140	3A	24	9	24-Sep	2015		1	42	42	6	118	112	326	1	7	0	M140_24-Sep_3A	0	0	magic
M140	3A	24	9	24-Sep	2015		1	42	42	6	118	112	326	1	8	1	M140_24-Sep_3A	0.847457627	16.66666667	magic
M140	3A	24	9	24-Sep	2015		1	42	42	6	118	112	326	1	9	1	M140_24-Sep_3A	0.847457627	16.66666667	magic
M140	3A	24	9	24-Sep	2015		1	42	42	6	118	112	326	1	10	0	M140_24-Sep_3A	0	0	magic
M140	3A	24	9	24-Sep	2015		1	42	42	6	118	112	326	1	11	1	M140_24-Sep_3A	0.847457627	16.66666667	magic
M140	3b	13	4	13-Apr	2016		5	30	32	24	193	169	315	2	1	0	M140_13-Apr_3b	0	0	magic
M140	3b	13	4	13-Apr	2016		5	30	32	24	193	169	315	2	2	0	M140_13-Apr_3b	0	0	magic
M140	3b	13	4	13-Apr	2016		5	30	32	24	193	169	315	2	3	8	M140_13-Apr_3b	4.14507772	33.33333333	magic
M140	3b	13	4	13-Apr	2016		5	30	32	24	193	169	315	2	4	11	M140_13-Apr_3b	5.699481865	45.83333333	magic
M140	3b	13	4	13-Apr	2016		5	30	32	24	193	169	315	2	5	2	M140_13-Apr_3b	1.03626943	8.333333333	magic
M140	3b	13	4	13-Apr	2016		5	30	32	24	193	169	315	2	6	2	M140_13-Apr_3b	1.03626943	8.333333333	magic
M140	3b	13	4	13-Apr	2016		5	30	32	24	193	169	315	2	7	1	M140_13-Apr_3b	0.518134715	4.166666667	magic
M140	3b	13	4	13-Apr	2016		5	30	32	24	193	169	315	2	8	0	M140_13-Apr_3b	0	0	magic
[truncated: 11,181 more rows]
