# Supplementary material for: An ABA-GA bistable switch can account for natural variation in the variability of Arabidopsis seed germination time
Source: eLife. 2021 Jun 1;10:e59485. doi: 10.7554/eLife.59485 (PMC8169117; doi:10.7554/eLife.59485)
Supplement: Supplementary file 2. [file elife-59485-supp2.csv]

Magic_Parent_line	Plant	Sowing_date	Sowing_round	Parent_vernalised	DAR	Mean_DAR	Total.germinated	Total	Ungerminated	id	RepNumber	day	number	name	perc	perc_total_ger	group
Bur-0	1B	17-Nov	1	No	31	30	114	116	2	1	1	1	0	1_17-Nov_1B_30	0	0	magic parents
Bur-0	1B	17-Nov	1	No	31	30	114	116	2	1	1	2	112	1_17-Nov_1B_30	96.55172414	98.24561404	magic parents
Bur-0	1B	17-Nov	1	No	31	30	114	116	2	1	1	3	2	1_17-Nov_1B_30	1.724137931	1.754385965	magic parents
Bur-0	1B	17-Nov	1	No	31	30	114	116	2	1	1	4	0	1_17-Nov_1B_30	0	0	magic parents
Bur-0	1B	30-Nov	2	No	44	43	119	122	3	4	1	1	0	1_30-Nov_1B_43	0	0	magic parents
Bur-0	1B	30-Nov	2	No	44	43	119	122	3	4	1	2	104	1_30-Nov_1B_43	85.24590164	87.39495798	magic parents
Bur-0	1B	30-Nov	2	No	44	43	119	122	3	4	1	3	15	1_30-Nov_1B_43	12.29508197	12.60504202	magic parents
Bur-0	1B	30-Nov	2	No	44	43	119	122	3	4	1	4	0	1_30-Nov_1B_43	0	0	magic parents
Bur-0	2A	17-Nov	1	No	28	30	102	103	1	2	2	1	0	1_17-Nov_2A_30	0	0	magic parents
Bur-0	2A	17-Nov	1	No	28	30	102	103	1	2	2	2	99	1_17-Nov_2A_30	96.11650485	97.05882353	magic parents
Bur-0	2A	17-Nov	1	No	28	30	102	103	1	2	2	3	3	1_17-Nov_2A_30	2.912621359	2.941176471	magic parents
Bur-0	2A	17-Nov	1	No	28	30	102	103	1	2	2	4	0	1_17-Nov_2A_30	0	0	magic parents
Bur-0	2A	30-Nov	2	No	41	43	110	111	1	5	2	1	0	1_30-Nov_2A_43	0	0	magic parents
Bur-0	2A	30-Nov	2	No	41	43	110	111	1	5	2	2	93	1_30-Nov_2A_43	83.78378378	84.54545455	magic parents
Bur-0	2A	30-Nov	2	No	41	43	110	111	1	5	2	3	17	1_30-Nov_2A_43	15.31531532	15.45454545	magic parents
Bur-0	2A	30-Nov	2	No	41	43	110	111	1	5	2	4	0	1_30-Nov_2A_43	0	0	magic parents
Bur-0	2B	17-Nov	1	No	31	30	111	113	2	3	3	1	0	1_17-Nov_2B_30	0	0	magic parents
Bur-0	2B	17-Nov	1	No	31	30	111	113	2	3	3	2	106	1_17-Nov_2B_30	93.80530973	95.4954955	magic parents
Bur-0	2B	17-Nov	1	No	31	30	111	113	2	3	3	3	4	1_17-Nov_2B_30	3.539823009	3.603603604	magic parents
Bur-0	2B	17-Nov	1	No	31	30	111	113	2	3	3	4	1	1_17-Nov_2B_30	0.884955752	0.900900901	magic parents
Bur-0	2B	30-Nov	2	No	44	43	113	116	3	6	3	1	0	1_30-Nov_2B_43	0	0	magic parents
Bur-0	2B	30-Nov	2	No	44	43	113	116	3	6	3	2	72	1_30-Nov_2B_43	62.06896552	63.71681416	magic parents
Bur-0	2B	30-Nov	2	No	44	43	113	116	3	6	3	3	41	1_30-Nov_2B_43	35.34482759	36.28318584	magic parents
Bur-0	2B	30-Nov	2	No	44	43	113	116	3	6	3	4	0	1_30-Nov_2B_43	0	0	magic parents
Can-0	1A	26-Oct	1	No	28	28	120	120	0	7	1	1	0	2_26-Oct_1A_28	0	0	magic parents
Can-0	1A	26-Oct	1	No	28	28	120	120	0	7	1	2	108	2_26-Oct_1A_28	90	90	magic parents
Can-0	1A	26-Oct	1	No	28	28	120	120	0	7	1	3	12	2_26-Oct_1A_28	10	10	magic parents
Can-0	1A	26-Oct	1	No	28	28	120	120	0	7	1	4	0	2_26-Oct_1A_28	0	0	magic parents
Can-0	1A	26-Oct	1	No	28	28	120	120	0	7	1	5	0	2_26-Oct_1A_28	0	0	magic parents
Can-0	1A	9-Nov	2	No	42	42	101	101	0	10	1	1	0	2_9-Nov_1A_42	0	0	magic parents
Can-0	1A	9-Nov	2	No	42	42	101	101	0	10	1	2	17	2_9-Nov_1A_42	16.83168317	16.83168317	magic parents
Can-0	1A	9-Nov	2	No	42	42	101	101	0	10	1	3	84	2_9-Nov_1A_42	83.16831683	83.16831683	magic parents
Can-0	1A	9-Nov	2	No	42	42	101	101	0	10	1	4	0	2_9-Nov_1A_42	0	0	magic parents
Can-0	1A	9-Nov	2	No	42	42	101	101	0	10	1	5	0	2_9-Nov_1A_42	0	0	magic parents
Can-0	1A	23-Nov	3	No	56	56	108	108	0	13	1	1	0	2_23-Nov_1A_56	0	0	magic parents
Can-0	1A	23-Nov	3	No	56	56	108	108	0	13	1	2	98	2_23-Nov_1A_56	90.74074074	90.74074074	magic parents
Can-0	1A	23-Nov	3	No	56	56	108	108	0	13	1	3	10	2_23-Nov_1A_56	9.259259259	9.259259259	magic parents
Can-0	1A	23-Nov	3	No	56	56	108	108	0	13	1	4	0	2_23-Nov_1A_56	0	0	magic parents
Can-0	1A	23-Nov	3	No	56	56	108	108	0	13	1	5	0	2_23-Nov_1A_56	0	0	magic parents
Can-0	1B	26-Oct	1	No	28	28	115	116	1	8	2	1	0	2_26-Oct_1B_28	0	0	magic parents
Can-0	1B	26-Oct	1	No	28	28	115	116	1	8	2	2	111	2_26-Oct_1B_28	95.68965517	96.52173913	magic parents
Can-0	1B	26-Oct	1	No	28	28	115	116	1	8	2	3	4	2_26-Oct_1B_28	3.448275862	3.47826087	magic parents
Can-0	1B	26-Oct	1	No	28	28	115	116	1	8	2	4	0	2_26-Oct_1B_28	0	0	magic parents
Can-0	1B	26-Oct	1	No	28	28	115	116	1	8	2	5	0	2_26-Oct_1B_28	0	0	magic parents
Can-0	1B	9-Nov	2	No	42	42	111	121	10	11	2	1	0	2_9-Nov_1B_42	0	0	magic parents
Can-0	1B	9-Nov	2	No	42	42	111	121	10	11	2	2	34	2_9-Nov_1B_42	28.09917355	30.63063063	magic parents
Can-0	1B	9-Nov	2	No	42	42	111	121	10	11	2	3	76	2_9-Nov_1B_42	62.80991736	68.46846847	magic parents
Can-0	1B	9-Nov	2	No	42	42	111	121	10	11	2	4	0	2_9-Nov_1B_42	0	0	magic parents
Can-0	1B	9-Nov	2	No	42	42	111	121	10	11	2	5	1	2_9-Nov_1B_42	0.826446281	0.900900901	magic parents
Can-0	1B	23-Nov	3	No	56	56	115	115	0	14	2	1	0	2_23-Nov_1B_56	0	0	magic parents
Can-0	1B	23-Nov	3	No	56	56	115	115	0	14	2	2	100	2_23-Nov_1B_56	86.95652174	86.95652174	magic parents
Can-0	1B	23-Nov	3	No	56	56	115	115	0	14	2	3	15	2_23-Nov_1B_56	13.04347826	13.04347826	magic parents
Can-0	1B	23-Nov	3	No	56	56	115	115	0	14	2	4	0	2_23-Nov_1B_56	0	0	magic parents
Can-0	1B	23-Nov	3	No	56	56	115	115	0	14	2	5	0	2_23-Nov_1B_56	0	0	magic parents
Can-0	2B	26-Oct	1	No	28	28	116	116	0	9	3	1	0	2_26-Oct_2B_28	0	0	magic parents
Can-0	2B	26-Oct	1	No	28	28	116	116	0	9	3	2	111	2_26-Oct_2B_28	95.68965517	95.68965517	magic parents
Can-0	2B	26-Oct	1	No	28	28	116	116	0	9	3	3	5	2_26-Oct_2B_28	4.310344828	4.310344828	magic parents
Can-0	2B	26-Oct	1	No	28	28	116	116	0	9	3	4	0	2_26-Oct_2B_28	0	0	magic parents
Can-0	2B	26-Oct	1	No	28	28	116	116	0	9	3	5	0	2_26-Oct_2B_28	0	0	magic parents
Can-0	2B	9-Nov	2	No	42	42	108	108	0	12	3	1	0	2_9-Nov_2B_42	0	0	magic parents
Can-0	2B	9-Nov	2	No	42	42	108	108	0	12	3	2	22	2_9-Nov_2B_42	20.37037037	20.37037037	magic parents
Can-0	2B	9-Nov	2	No	42	42	108	108	0	12	3	3	86	2_9-Nov_2B_42	79.62962963	79.62962963	magic parents
Can-0	2B	9-Nov	2	No	42	42	108	108	0	12	3	4	0	2_9-Nov_2B_42	0	0	magic parents
Can-0	2B	9-Nov	2	No	42	42	108	108	0	12	3	5	0	2_9-Nov_2B_42	0	0	magic parents
Can-0	2B	23-Nov	3	No	56	56	115	115	0	15	3	1	0	2_23-Nov_2B_56	0	0	magic parents
Can-0	2B	23-Nov	3	No	56	56	115	115	0	15	3	2	103	2_23-Nov_2B_56	89.56521739	89.56521739	magic parents
Can-0	2B	23-Nov	3	No	56	56	115	115	0	15	3	3	12	2_23-Nov_2B_56	10.43478261	10.43478261	magic parents
Can-0	2B	23-Nov	3	No	56	56	115	115	0	15	3	4	0	2_23-Nov_2B_56	0	0	magic parents
Can-0	2B	23-Nov	3	No	56	56	115	115	0	15	3	5	0	2_23-Nov_2B_56	0	0	magic parents
Col-0	1B	3-Nov	1	No	31	33	128	132	4	17	2	1	0	3_3-Nov_1B_33	0	0	magic parents
Col-0	1B	3-Nov	1	No	31	33	128	132	4	17	2	2	128	3_3-Nov_1B_33	96.96969697	100	magic parents
Col-0	1B	3-Nov	1	No	31	33	128	132	4	17	2	3	0	3_3-Nov_1B_33	0	0	magic parents
Col-0	1B	17-Nov	2	No	46	47	115	115	0	19	1	1	0	3_17-Nov_1B_47	0	0	magic parents
Col-0	1B	17-Nov	2	No	46	47	115	115	0	19	1	2	112	3_17-Nov_1B_47	97.39130435	97.39130435	magic parents
Col-0	1B	17-Nov	2	No	46	47	115	115	0	19	1	3	3	3_17-Nov_1B_47	2.608695652	2.608695652	magic parents
Col-0	1B	30-Nov	3	No	59	60	122	123	1	22	1	1	0	3_30-Nov_1B_60	0	0	magic parents
Col-0	1B	30-Nov	3	No	59	60	122	123	1	22	1	2	119	3_30-Nov_1B_60	96.74796748	97.54098361	magic parents
Col-0	1B	30-Nov	3	No	59	60	122	123	1	22	1	3	3	3_30-Nov_1B_60	2.43902439	2.459016393	magic parents
Col-0	2A	3-Nov	1	No	36	33	128	130	2	16	1	1	0	3_3-Nov_2A_33	0	0	magic parents
Col-0	2A	3-Nov	1	No	36	33	128	130	2	16	1	2	127	3_3-Nov_2A_33	97.69230769	99.21875	magic parents
Col-0	2A	3-Nov	1	No	36	33	128	130	2	16	1	3	1	3_3-Nov_2A_33	0.769230769	0.78125	magic parents
Col-0	2A	17-Nov	2	No	50	47	110	110	0	20	2	1	0	3_17-Nov_2A_47	0	0	magic parents
Col-0	2A	17-Nov	2	No	50	47	110	110	0	20	2	2	108	3_17-Nov_2A_47	98.18181818	98.18181818	magic parents
Col-0	2A	17-Nov	2	No	50	47	110	110	0	20	2	3	2	3_17-Nov_2A_47	1.818181818	1.818181818	magic parents
Col-0	2A	30-Nov	3	No	63	60	114	115	1	23	2	1	0	3_30-Nov_2A_60	0	0	magic parents
Col-0	2A	30-Nov	3	No	63	60	114	115	1	23	2	2	113	3_30-Nov_2A_60	98.26086957	99.12280702	magic parents
Col-0	2A	30-Nov	3	No	63	60	114	115	1	23	2	3	1	3_30-Nov_2A_60	0.869565217	0.877192982	magic parents
Col-0	3A	3-Nov	1	No	31	33	132	132	0	18	3	1	0	3_3-Nov_3A_33	0	0	magic parents
Col-0	3A	3-Nov	1	No	31	33	132	132	0	18	3	2	132	3_3-Nov_3A_33	100	100	magic parents
Col-0	3A	3-Nov	1	No	31	33	132	132	0	18	3	3	0	3_3-Nov_3A_33	0	0	magic parents
Col-0	3A	17-Nov	2	No	46	47	116	117	1	21	3	1	0	3_17-Nov_3A_47	0	0	magic parents
Col-0	3A	17-Nov	2	No	46	47	116	117	1	21	3	2	115	3_17-Nov_3A_47	98.29059829	99.13793103	magic parents
Col-0	3A	17-Nov	2	No	46	47	116	117	1	21	3	3	1	3_17-Nov_3A_47	0.854700855	0.862068966	magic parents
Col-0	3A	30-Nov	3	No	59	60	119	120	1	24	3	1	0	3_30-Nov_3A_60	0	0	magic parents
Col-0	3A	30-Nov	3	No	59	60	119	120	1	24	3	2	67	3_30-Nov_3A_60	55.83333333	56.30252101	magic parents
Col-0	3A	30-Nov	3	No	59	60	119	120	1	24	3	3	52	3_30-Nov_3A_60	43.33333333	43.69747899	magic parents
Ct-1	1A	26-Oct	1	No	28	28	40	118	78	25	1	1	0	4_26-Oct_1A_28	0	0	magic parents
Ct-1	1A	26-Oct	1	No	28	28	40	118	78	25	1	2	7	4_26-Oct_1A_28	5.93220339	17.5	magic parents
Ct-1	1A	26-Oct	1	No	28	28	40	118	78	25	1	3	33	4_26-Oct_1A_28	27.96610169	82.5	magic parents
Ct-1	1A	26-Oct	1	No	28	28	40	118	78	25	1	4	0	4_26-Oct_1A_28	0	0	magic parents
Ct-1	1A	26-Oct	1	No	28	28	40	118	78	25	1	5	0	4_26-Oct_1A_28	0	0	magic parents
Ct-1	1A	9-Nov	2	No	42	42	64	110	46	29	1	1	0	4_9-Nov_1A_42	0	0	magic parents
Ct-1	1A	9-Nov	2	No	42	42	64	110	46	29	1	2	5	4_9-Nov_1A_42	4.545454545	7.8125	magic parents
Ct-1	1A	9-Nov	2	No	42	42	64	110	46	29	1	3	58	4_9-Nov_1A_42	52.72727273	90.625	magic parents
Ct-1	1A	9-Nov	2	No	42	42	64	110	46	29	1	4	1	4_9-Nov_1A_42	0.909090909	1.5625	magic parents
Ct-1	1A	9-Nov	2	No	42	42	64	110	46	29	1	5	0	4_9-Nov_1A_42	0	0	magic parents
Ct-1	1A	23-Nov	3	No	56	56	83	113	30	33	1	1	0	4_23-Nov_1A_56	0	0	magic parents
Ct-1	1A	23-Nov	3	No	56	56	83	113	30	33	1	2	18	4_23-Nov_1A_56	15.92920354	21.68674699	magic parents
Ct-1	1A	23-Nov	3	No	56	56	83	113	30	33	1	3	64	4_23-Nov_1A_56	56.63716814	77.10843373	magic parents
Ct-1	1A	23-Nov	3	No	56	56	83	113	30	33	1	4	1	4_23-Nov_1A_56	0.884955752	1.204819277	magic parents
Ct-1	1A	23-Nov	3	No	56	56	83	113	30	33	1	5	0	4_23-Nov_1A_56	0	0	magic parents
Ct-1	1B	26-Oct	1	No	28	28	74	108	34	26	2	1	0	4_26-Oct_1B_28	0	0	magic parents
Ct-1	1B	26-Oct	1	No	28	28	74	108	34	26	2	2	36	4_26-Oct_1B_28	33.33333333	48.64864865	magic parents
Ct-1	1B	26-Oct	1	No	28	28	74	108	34	26	2	3	38	4_26-Oct_1B_28	35.18518519	51.35135135	magic parents
Ct-1	1B	26-Oct	1	No	28	28	74	108	34	26	2	4	0	4_26-Oct_1B_28	0	0	magic parents
Ct-1	1B	26-Oct	1	No	28	28	74	108	34	26	2	5	0	4_26-Oct_1B_28	0	0	magic parents
Ct-1	1B	9-Nov	2	No	42	42	81	110	29	30	2	1	0	4_9-Nov_1B_42	0	0	magic parents
Ct-1	1B	9-Nov	2	No	42	42	81	110	29	30	2	2	21	4_9-Nov_1B_42	19.09090909	25.92592593	magic parents
Ct-1	1B	9-Nov	2	No	42	42	81	110	29	30	2	3	60	4_9-Nov_1B_42	54.54545455	74.07407407	magic parents
Ct-1	1B	9-Nov	2	No	42	42	81	110	29	30	2	4	0	4_9-Nov_1B_42	0	0	magic parents
Ct-1	1B	9-Nov	2	No	42	42	81	110	29	30	2	5	0	4_9-Nov_1B_42	0	0	magic parents
Ct-1	1B	23-Nov	3	No	56	56	85	101	16	34	2	1	0	4_23-Nov_1B_56	0	0	magic parents
Ct-1	1B	23-Nov	3	No	56	56	85	101	16	34	2	2	31	4_23-Nov_1B_56	30.69306931	36.47058824	magic parents
Ct-1	1B	23-Nov	3	No	56	56	85	101	16	34	2	3	51	4_23-Nov_1B_56	50.4950495	60	magic parents
Ct-1	1B	23-Nov	3	No	56	56	85	101	16	34	2	4	2	4_23-Nov_1B_56	1.98019802	2.352941176	magic parents
Ct-1	1B	23-Nov	3	No	56	56	85	101	16	34	2	5	1	4_23-Nov_1B_56	0.99009901	1.176470588	magic parents
Ct-1	2A	26-Oct	1	No	28	28	39	117	78	27	3	1	0	4_26-Oct_2A_28	0	0	magic parents
Ct-1	2A	26-Oct	1	No	28	28	39	117	78	27	3	2	6	4_26-Oct_2A_28	5.128205128	15.38461538	magic parents
Ct-1	2A	26-Oct	1	No	28	28	39	117	78	27	3	3	32	4_26-Oct_2A_28	27.35042735	82.05128205	magic parents
Ct-1	2A	26-Oct	1	No	28	28	39	117	78	27	3	4	1	4_26-Oct_2A_28	0.854700855	2.564102564	magic parents
Ct-1	2A	26-Oct	1	No	28	28	39	117	78	27	3	5	0	4_26-Oct_2A_28	0	0	magic parents
Ct-1	2A	9-Nov	2	No	42	42	45	109	64	31	3	1	0	4_9-Nov_2A_42	0	0	magic parents
Ct-1	2A	9-Nov	2	No	42	42	45	109	64	31	3	2	1	4_9-Nov_2A_42	0.917431193	2.222222222	magic parents
Ct-1	2A	9-Nov	2	No	42	42	45	109	64	31	3	3	44	4_9-Nov_2A_42	40.36697248	97.77777778	magic parents
Ct-1	2A	9-Nov	2	No	42	42	45	109	64	31	3	4	0	4_9-Nov_2A_42	0	0	magic parents
Ct-1	2A	9-Nov	2	No	42	42	45	109	64	31	3	5	0	4_9-Nov_2A_42	0	0	magic parents
Ct-1	2A	23-Nov	3	No	56	56	53	109	56	35	3	1	0	4_23-Nov_2A_56	0	0	magic parents
Ct-1	2A	23-Nov	3	No	56	56	53	109	56	35	3	2	12	4_23-Nov_2A_56	11.00917431	22.64150943	magic parents
Ct-1	2A	23-Nov	3	No	56	56	53	109	56	35	3	3	39	4_23-Nov_2A_56	35.77981651	73.58490566	magic parents
Ct-1	2A	23-Nov	3	No	56	56	53	109	56	35	3	4	2	4_23-Nov_2A_56	1.834862385	3.773584906	magic parents
Ct-1	2A	23-Nov	3	No	56	56	53	109	56	35	3	5	0	4_23-Nov_2A_56	0	0	magic parents
Ct-1	3A	26-Oct	1	No	28	28	6	127	121	28	4	1	0	4_26-Oct_3A_28	0	0	magic parents
Ct-1	3A	26-Oct	1	No	28	28	6	127	121	28	4	2	1	4_26-Oct_3A_28	0.787401575	16.66666667	magic parents
Ct-1	3A	26-Oct	1	No	28	28	6	127	121	28	4	3	5	4_26-Oct_3A_28	3.937007874	83.33333333	magic parents
Ct-1	3A	26-Oct	1	No	28	28	6	127	121	28	4	4	0	4_26-Oct_3A_28	0	0	magic parents
Ct-1	3A	26-Oct	1	No	28	28	6	127	121	28	4	5	0	4_26-Oct_3A_28	0	0	magic parents
Ct-1	3A	9-Nov	2	No	42	42	15	104	89	32	4	1	0	4_9-Nov_3A_42	0	0	magic parents
Ct-1	3A	9-Nov	2	No	42	42	15	104	89	32	4	2	0	4_9-Nov_3A_42	0	0	magic parents
Ct-1	3A	9-Nov	2	No	42	42	15	104	89	32	4	3	15	4_9-Nov_3A_42	14.42307692	100	magic parents
Ct-1	3A	9-Nov	2	No	42	42	15	104	89	32	4	4	0	4_9-Nov_3A_42	0	0	magic parents
Ct-1	3A	9-Nov	2	No	42	42	15	104	89	32	4	5	0	4_9-Nov_3A_42	0	0	magic parents
Ct-1	3A	23-Nov	3	No	56	56	11	113	102	36	4	1	0	4_23-Nov_3A_56	0	0	magic parents
Ct-1	3A	23-Nov	3	No	56	56	11	113	102	36	4	2	1	4_23-Nov_3A_56	0.884955752	9.090909091	magic parents
Ct-1	3A	23-Nov	3	No	56	56	11	113	102	36	4	3	10	4_23-Nov_3A_56	8.849557522	90.90909091	magic parents
Ct-1	3A	23-Nov	3	No	56	56	11	113	102	36	4	4	0	4_23-Nov_3A_56	0	0	magic parents
Ct-1	3A	23-Nov	3	No	56	56	11	113	102	36	4	5	0	4_23-Nov_3A_56	0	0	magic parents
Edi-1	A	11-Dec	1	No	21	21	9	111	102	37	1	1	0	5_11-Dec_A_21	0	0	magic parents
Edi-1	A	11-Dec	1	No	21	21	9	111	102	37	1	2	0	5_11-Dec_A_21	0	0	magic parents
Edi-1	A	11-Dec	1	No	21	21	9	111	102	37	1	3	2	5_11-Dec_A_21	1.801801802	22.22222222	magic parents
Edi-1	A	11-Dec	1	No	21	21	9	111	102	37	1	4	3	5_11-Dec_A_21	2.702702703	33.33333333	magic parents
Edi-1	A	11-Dec	1	No	21	21	9	111	102	37	1	5	3	5_11-Dec_A_21	2.702702703	33.33333333	magic parents
Edi-1	A	11-Dec	1	No	21	21	9	111	102	37	1	6	0	5_11-Dec_A_21	0	0	magic parents
Edi-1	A	11-Dec	1	No	21	21	9	111	102	37	1	7	1	5_11-Dec_A_21	0.900900901	11.11111111	magic parents
Edi-1	A	5-Jan	2	No	46	46	12	106	94	41	1	1	0	5_5-Jan_A_46	0	0	magic parents
Edi-1	A	5-Jan	2	No	46	46	12	106	94	41	1	2	0	5_5-Jan_A_46	0	0	magic parents
Edi-1	A	5-Jan	2	No	46	46	12	106	94	41	1	3	2	5_5-Jan_A_46	1.886792453	16.66666667	magic parents
Edi-1	A	5-Jan	2	No	46	46	12	106	94	41	1	4	8	5_5-Jan_A_46	7.547169811	66.66666667	magic parents
Edi-1	A	5-Jan	2	No	46	46	12	106	94	41	1	5	1	5_5-Jan_A_46	0.943396226	8.333333333	magic parents
Edi-1	A	5-Jan	2	No	46	46	12	106	94	41	1	6	1	5_5-Jan_A_46	0.943396226	8.333333333	magic parents
Edi-1	A	5-Jan	2	No	46	46	12	106	94	41	1	7	0	5_5-Jan_A_46	0	0	magic parents
Edi-1	B	11-Dec	1	No	21	21	18	112	94	38	2	1	0	5_11-Dec_B_21	0	0	magic parents
Edi-1	B	11-Dec	1	No	21	21	18	112	94	38	2	2	0	5_11-Dec_B_21	0	0	magic parents
Edi-1	B	11-Dec	1	No	21	21	18	112	94	38	2	3	7	5_11-Dec_B_21	6.25	38.88888889	magic parents
Edi-1	B	11-Dec	1	No	21	21	18	112	94	38	2	4	9	5_11-Dec_B_21	8.035714286	50	magic parents
Edi-1	B	11-Dec	1	No	21	21	18	112	94	38	2	5	1	5_11-Dec_B_21	0.892857143	5.555555556	magic parents
Edi-1	B	11-Dec	1	No	21	21	18	112	94	38	2	6	1	5_11-Dec_B_21	0.892857143	5.555555556	magic parents
Edi-1	B	11-Dec	1	No	21	21	18	112	94	38	2	7	0	5_11-Dec_B_21	0	0	magic parents
Edi-1	B	5-Jan	2	No	46	46	14	100	86	42	2	1	0	5_5-Jan_B_46	0	0	magic parents
Edi-1	B	5-Jan	2	No	46	46	14	100	86	42	2	2	0	5_5-Jan_B_46	0	0	magic parents
Edi-1	B	5-Jan	2	No	46	46	14	100	86	42	2	3	8	5_5-Jan_B_46	8	57.14285714	magic parents
Edi-1	B	5-Jan	2	No	46	46	14	100	86	42	2	4	4	5_5-Jan_B_46	4	28.57142857	magic parents
Edi-1	B	5-Jan	2	No	46	46	14	100	86	42	2	5	1	5_5-Jan_B_46	1	7.142857143	magic parents
Edi-1	B	5-Jan	2	No	46	46	14	100	86	42	2	6	1	5_5-Jan_B_46	1	7.142857143	magic parents
Edi-1	B	5-Jan	2	No	46	46	14	100	86	42	2	7	0	5_5-Jan_B_46	0	0	magic parents
Edi-1	C	11-Dec	1	No	21	21	18	106	88	39	3	1	0	5_11-Dec_C_21	0	0	magic parents
Edi-1	C	11-Dec	1	No	21	21	18	106	88	39	3	2	0	5_11-Dec_C_21	0	0	magic parents
Edi-1	C	11-Dec	1	No	21	21	18	106	88	39	3	3	4	5_11-Dec_C_21	3.773584906	22.22222222	magic parents
Edi-1	C	11-Dec	1	No	21	21	18	106	88	39	3	4	10	5_11-Dec_C_21	9.433962264	55.55555556	magic parents
Edi-1	C	11-Dec	1	No	21	21	18	106	88	39	3	5	4	5_11-Dec_C_21	3.773584906	22.22222222	magic parents
Edi-1	C	11-Dec	1	No	21	21	18	106	88	39	3	6	0	5_11-Dec_C_21	0	0	magic parents
Edi-1	C	11-Dec	1	No	21	21	18	106	88	39	3	7	0	5_11-Dec_C_21	0	0	magic parents
Edi-1	C	5-Jan	2	No	46	46	9	103	94	43	3	1	0	5_5-Jan_C_46	0	0	magic parents
Edi-1	C	5-Jan	2	No	46	46	9	103	94	43	3	2	0	5_5-Jan_C_46	0	0	magic parents
Edi-1	C	5-Jan	2	No	46	46	9	103	94	43	3	3	3	5_5-Jan_C_46	2.912621359	33.33333333	magic parents
Edi-1	C	5-Jan	2	No	46	46	9	103	94	43	3	4	2	5_5-Jan_C_46	1.941747573	22.22222222	magic parents
Edi-1	C	5-Jan	2	No	46	46	9	103	94	43	3	5	3	5_5-Jan_C_46	2.912621359	33.33333333	magic parents
Edi-1	C	5-Jan	2	No	46	46	9	103	94	43	3	6	1	5_5-Jan_C_46	0.970873786	11.11111111	magic parents
Edi-1	C	5-Jan	2	No	46	46	9	103	94	43	3	7	0	5_5-Jan_C_46	0	0	magic parents
Edi-1	D	11-Dec	1	No	21	21	86	105	19	40	4	1	0	5_11-Dec_D_21	0	0	magic parents
Edi-1	D	11-Dec	1	No	21	21	86	105	19	40	4	2	9	5_11-Dec_D_21	8.571428571	10.46511628	magic parents
Edi-1	D	11-Dec	1	No	21	21	86	105	19	40	4	3	49	5_11-Dec_D_21	46.66666667	56.97674419	magic parents
Edi-1	D	11-Dec	1	No	21	21	86	105	19	40	4	4	26	5_11-Dec_D_21	24.76190476	30.23255814	magic parents
Edi-1	D	11-Dec	1	No	21	21	86	105	19	40	4	5	2	5_11-Dec_D_21	1.904761905	2.325581395	magic parents
Edi-1	D	11-Dec	1	No	21	21	86	105	19	40	4	6	0	5_11-Dec_D_21	0	0	magic parents
Edi-1	D	11-Dec	1	No	21	21	86	105	19	40	4	7	0	5_11-Dec_D_21	0	0	magic parents
Edi-1	D	5-Jan	2	No	46	46	76	100	24	44	4	1	0	5_5-Jan_D_46	0	0	magic parents
Edi-1	D	5-Jan	2	No	46	46	76	100	24	44	4	2	22	5_5-Jan_D_46	22	28.94736842	magic parents
Edi-1	D	5-Jan	2	No	46	46	76	100	24	44	4	3	43	5_5-Jan_D_46	43	56.57894737	magic parents
Edi-1	D	5-Jan	2	No	46	46	76	100	24	44	4	4	11	5_5-Jan_D_46	11	14.47368421	magic parents
Edi-1	D	5-Jan	2	No	46	46	76	100	24	44	4	5	0	5_5-Jan_D_46	0	0	magic parents
Edi-1	D	5-Jan	2	No	46	46	76	100	24	44	4	6	0	5_5-Jan_D_46	0	0	magic parents
Edi-1	D	5-Jan	2	No	46	46	76	100	24	44	4	7	0	5_5-Jan_D_46	0	0	magic parents
Hi-0	1A	26-Oct	1	No	31	31	29	128	99	45	1	1	0	6_26-Oct_1A_31	0	0	magic parents
Hi-0	1A	26-Oct	1	No	31	31	29	128	99	45	1	2	0	6_26-Oct_1A_31	0	0	magic parents
Hi-0	1A	26-Oct	1	No	31	31	29	128	99	45	1	3	9	6_26-Oct_1A_31	7.03125	31.03448276	magic parents
Hi-0	1A	26-Oct	1	No	31	31	29	128	99	45	1	4	7	6_26-Oct_1A_31	5.46875	24.13793103	magic parents
Hi-0	1A	26-Oct	1	No	31	31	29	128	99	45	1	5	10	6_26-Oct_1A_31	7.8125	34.48275862	magic parents
Hi-0	1A	26-Oct	1	No	31	31	29	128	99	45	1	6	1	6_26-Oct_1A_31	0.78125	3.448275862	magic parents
Hi-0	1A	26-Oct	1	No	31	31	29	128	99	45	1	7	2	6_26-Oct_1A_31	1.5625	6.896551724	magic parents
Hi-0	1A	9-Nov	2	No	45	45	22	117	95	49	1	1	0	6_9-Nov_1A_45	0	0	magic parents
Hi-0	1A	9-Nov	2	No	45	45	22	117	95	49	1	2	0	6_9-Nov_1A_45	0	0	magic parents
Hi-0	1A	9-Nov	2	No	45	45	22	117	95	49	1	3	9	6_9-Nov_1A_45	7.692307692	40.90909091	magic parents
Hi-0	1A	9-Nov	2	No	45	45	22	117	95	49	1	4	9	6_9-Nov_1A_45	7.692307692	40.90909091	magic parents
Hi-0	1A	9-Nov	2	No	45	45	22	117	95	49	1	5	4	6_9-Nov_1A_45	3.418803419	18.18181818	magic parents
Hi-0	1A	9-Nov	2	No	45	45	22	117	95	49	1	6	0	6_9-Nov_1A_45	0	0	magic parents
Hi-0	1A	9-Nov	2	No	45	45	22	117	95	49	1	7	0	6_9-Nov_1A_45	0	0	magic parents
Hi-0	1A	23-Nov	3	No	59	59	45	123	78	53	1	1	0	6_23-Nov_1A_59	0	0	magic parents
Hi-0	1A	23-Nov	3	No	59	59	45	123	78	53	1	2	0	6_23-Nov_1A_59	0	0	magic parents
Hi-0	1A	23-Nov	3	No	59	59	45	123	78	53	1	3	23	6_23-Nov_1A_59	18.69918699	51.11111111	magic parents
Hi-0	1A	23-Nov	3	No	59	59	45	123	78	53	1	4	17	6_23-Nov_1A_59	13.82113821	37.77777778	magic parents
Hi-0	1A	23-Nov	3	No	59	59	45	123	78	53	1	5	4	6_23-Nov_1A_59	3.25203252	8.888888889	magic parents
Hi-0	1A	23-Nov	3	No	59	59	45	123	78	53	1	6	1	6_23-Nov_1A_59	0.81300813	2.222222222	magic parents
Hi-0	1A	23-Nov	3	No	59	59	45	123	78	53	1	7	0	6_23-Nov_1A_59	0	0	magic parents
Hi-0	1B	26-Oct	1	No	31	31	34	129	95	46	2	1	0	6_26-Oct_1B_31	0	0	magic parents
Hi-0	1B	26-Oct	1	No	31	31	34	129	95	46	2	2	0	6_26-Oct_1B_31	0	0	magic parents
Hi-0	1B	26-Oct	1	No	31	31	34	129	95	46	2	3	14	6_26-Oct_1B_31	10.85271318	41.17647059	magic parents
Hi-0	1B	26-Oct	1	No	31	31	34	129	95	46	2	4	12	6_26-Oct_1B_31	9.302325581	35.29411765	magic parents
Hi-0	1B	26-Oct	1	No	31	31	34	129	95	46	2	5	7	6_26-Oct_1B_31	5.426356589	20.58823529	magic parents
Hi-0	1B	26-Oct	1	No	31	31	34	129	95	46	2	6	1	6_26-Oct_1B_31	0.775193798	2.941176471	magic parents
Hi-0	1B	26-Oct	1	No	31	31	34	129	95	46	2	7	0	6_26-Oct_1B_31	0	0	magic parents
Hi-0	1B	9-Nov	2	No	45	45	34	118	84	50	2	1	0	6_9-Nov_1B_45	0	0	magic parents
Hi-0	1B	9-Nov	2	No	45	45	34	118	84	50	2	2	0	6_9-Nov_1B_45	0	0	magic parents
Hi-0	1B	9-Nov	2	No	45	45	34	118	84	50	2	3	10	6_9-Nov_1B_45	8.474576271	29.41176471	magic parents
Hi-0	1B	9-Nov	2	No	45	45	34	118	84	50	2	4	15	6_9-Nov_1B_45	12.71186441	44.11764706	magic parents
Hi-0	1B	9-Nov	2	No	45	45	34	118	84	50	2	5	7	6_9-Nov_1B_45	5.93220339	20.58823529	magic parents
Hi-0	1B	9-Nov	2	No	45	45	34	118	84	50	2	6	1	6_9-Nov_1B_45	0.847457627	2.941176471	magic parents
Hi-0	1B	9-Nov	2	No	45	45	34	118	84	50	2	7	1	6_9-Nov_1B_45	0.847457627	2.941176471	magic parents
Hi-0	1B	23-Nov	3	No	59	59	52	110	58	54	2	1	0	6_23-Nov_1B_59	0	0	magic parents
Hi-0	1B	23-Nov	3	No	59	59	52	110	58	54	2	2	0	6_23-Nov_1B_59	0	0	magic parents
Hi-0	1B	23-Nov	3	No	59	59	52	110	58	54	2	3	26	6_23-Nov_1B_59	23.63636364	50	magic parents
Hi-0	1B	23-Nov	3	No	59	59	52	110	58	54	2	4	22	6_23-Nov_1B_59	20	42.30769231	magic parents
Hi-0	1B	23-Nov	3	No	59	59	52	110	58	54	2	5	3	6_23-Nov_1B_59	2.727272727	5.769230769	magic parents
Hi-0	1B	23-Nov	3	No	59	59	52	110	58	54	2	6	1	6_23-Nov_1B_59	0.909090909	1.923076923	magic parents
Hi-0	1B	23-Nov	3	No	59	59	52	110	58	54	2	7	0	6_23-Nov_1B_59	0	0	magic parents
Hi-0	2A	26-Oct	1	No	31	31	19	118	99	47	3	1	0	6_26-Oct_2A_31	0	0	magic parents
Hi-0	2A	26-Oct	1	No	31	31	19	118	99	47	3	2	0	6_26-Oct_2A_31	0	0	magic parents
Hi-0	2A	26-Oct	1	No	31	31	19	118	99	47	3	3	3	6_26-Oct_2A_31	2.542372881	15.78947368	magic parents
Hi-0	2A	26-Oct	1	No	31	31	19	118	99	47	3	4	9	6_26-Oct_2A_31	7.627118644	47.36842105	magic parents
Hi-0	2A	26-Oct	1	No	31	31	19	118	99	47	3	5	5	6_26-Oct_2A_31	4.237288136	26.31578947	magic parents
Hi-0	2A	26-Oct	1	No	31	31	19	118	99	47	3	6	1	6_26-Oct_2A_31	0.847457627	5.263157895	magic parents
Hi-0	2A	26-Oct	1	No	31	31	19	118	99	47	3	7	1	6_26-Oct_2A_31	0.847457627	5.263157895	magic parents
Hi-0	2A	9-Nov	2	No	45	45	33	129	96	51	3	1	0	6_9-Nov_2A_45	0	0	magic parents
Hi-0	2A	9-Nov	2	No	45	45	33	129	96	51	3	2	0	6_9-Nov_2A_45	0	0	magic parents
Hi-0	2A	9-Nov	2	No	45	45	33	129	96	51	3	3	13	6_9-Nov_2A_45	10.07751938	39.39393939	magic parents
Hi-0	2A	9-Nov	2	No	45	45	33	129	96	51	3	4	13	6_9-Nov_2A_45	10.07751938	39.39393939	magic parents
Hi-0	2A	9-Nov	2	No	45	45	33	129	96	51	3	5	5	6_9-Nov_2A_45	3.875968992	15.15151515	magic parents
Hi-0	2A	9-Nov	2	No	45	45	33	129	96	51	3	6	1	6_9-Nov_2A_45	0.775193798	3.03030303	magic parents
Hi-0	2A	9-Nov	2	No	45	45	33	129	96	51	3	7	1	6_9-Nov_2A_45	0.775193798	3.03030303	magic parents
Hi-0	2A	23-Nov	3	No	59	59	48	116	68	55	3	1	0	6_23-Nov_2A_59	0	0	magic parents
Hi-0	2A	23-Nov	3	No	59	59	48	116	68	55	3	2	0	6_23-Nov_2A_59	0	0	magic parents
Hi-0	2A	23-Nov	3	No	59	59	48	116	68	55	3	3	29	6_23-Nov_2A_59	25	60.41666667	magic parents
Hi-0	2A	23-Nov	3	No	59	59	48	116	68	55	3	4	14	6_23-Nov_2A_59	12.06896552	29.16666667	magic parents
Hi-0	2A	23-Nov	3	No	59	59	48	116	68	55	3	5	4	6_23-Nov_2A_59	3.448275862	8.333333333	magic parents
Hi-0	2A	23-Nov	3	No	59	59	48	116	68	55	3	6	1	6_23-Nov_2A_59	0.862068966	2.083333333	magic parents
Hi-0	2A	23-Nov	3	No	59	59	48	116	68	55	3	7	0	6_23-Nov_2A_59	0	0	magic parents
Hi-0	3A	26-Oct	1	No	31	31	36	126	90	48	4	1	0	6_26-Oct_3A_31	0	0	magic parents
Hi-0	3A	26-Oct	1	No	31	31	36	126	90	48	4	2	1	6_26-Oct_3A_31	0.793650794	2.777777778	magic parents
Hi-0	3A	26-Oct	1	No	31	31	36	126	90	48	4	3	11	6_26-Oct_3A_31	8.73015873	30.55555556	magic parents
Hi-0	3A	26-Oct	1	No	31	31	36	126	90	48	4	4	17	6_26-Oct_3A_31	13.49206349	47.22222222	magic parents
Hi-0	3A	26-Oct	1	No	31	31	36	126	90	48	4	5	2	6_26-Oct_3A_31	1.587301587	5.555555556	magic parents
Hi-0	3A	26-Oct	1	No	31	31	36	126	90	48	4	6	4	6_26-Oct_3A_31	3.174603175	11.11111111	magic parents
Hi-0	3A	26-Oct	1	No	31	31	36	126	90	48	4	7	1	6_26-Oct_3A_31	0.793650794	2.777777778	magic parents
Hi-0	3A	9-Nov	2	No	45	45	42	110	68	52	4	1	0	6_9-Nov_3A_45	0	0	magic parents
Hi-0	3A	9-Nov	2	No	45	45	42	110	68	52	4	2	0	6_9-Nov_3A_45	0	0	magic parents
Hi-0	3A	9-Nov	2	No	45	45	42	110	68	52	4	3	16	6_9-Nov_3A_45	14.54545455	38.0952381	magic parents
Hi-0	3A	9-Nov	2	No	45	45	42	110	68	52	4	4	20	6_9-Nov_3A_45	18.18181818	47.61904762	magic parents
Hi-0	3A	9-Nov	2	No	45	45	42	110	68	52	4	5	5	6_9-Nov_3A_45	4.545454545	11.9047619	magic parents
Hi-0	3A	9-Nov	2	No	45	45	42	110	68	52	4	6	1	6_9-Nov_3A_45	0.909090909	2.380952381	magic parents
Hi-0	3A	9-Nov	2	No	45	45	42	110	68	52	4	7	0	6_9-Nov_3A_45	0	0	magic parents
Hi-0	3A	23-Nov	3	No	59	59	63	104	41	56	4	1	0	6_23-Nov_3A_59	0	0	magic parents
Hi-0	3A	23-Nov	3	No	59	59	63	104	41	56	4	2	0	6_23-Nov_3A_59	0	0	magic parents
Hi-0	3A	23-Nov	3	No	59	59	63	104	41	56	4	3	26	6_23-Nov_3A_59	25	41.26984127	magic parents
Hi-0	3A	23-Nov	3	No	59	59	63	104	41	56	4	4	30	6_23-Nov_3A_59	28.84615385	47.61904762	magic parents
Hi-0	3A	23-Nov	3	No	59	59	63	104	41	56	4	5	5	6_23-Nov_3A_59	4.807692308	7.936507937	magic parents
Hi-0	3A	23-Nov	3	No	59	59	63	104	41	56	4	6	2	6_23-Nov_3A_59	1.923076923	3.174603175	magic parents
Hi-0	3A	23-Nov	3	No	59	59	63	104	41	56	4	7	0	6_23-Nov_3A_59	0	0	magic parents
Kn-0	A	11-Dec	1	No	25	23	115	115	0	57	1	1	0	7_11-Dec_A_23	0	0	magic parents
Kn-0	A	11-Dec	1	No	25	23	115	115	0	57	1	2	0	7_11-Dec_A_23	0	0	magic parents
Kn-0	A	11-Dec	1	No	25	23	115	115	0	57	1	3	68	7_11-Dec_A_23	59.13043478	59.13043478	magic parents
Kn-0	A	11-Dec	1	No	25	23	115	115	0	57	1	4	47	7_11-Dec_A_23	40.86956522	40.86956522	magic parents
Kn-0	A	11-Dec	1	No	25	23	115	115	0	57	1	5	0	7_11-Dec_A_23	0	0	magic parents
Kn-0	A	11-Dec	1	No	25	23	115	115	0	57	1	6	0	7_11-Dec_A_23	0	0	magic parents
Kn-0	A	5-Jan	2	No	50	48	109	109	0	61	1	1	0	7_5-Jan_A_48	0	0	magic parents
Kn-0	A	5-Jan	2	No	50	48	109	109	0	61	1	2	34	7_5-Jan_A_48	31.19266055	31.19266055	magic parents
Kn-0	A	5-Jan	2	No	50	48	109	109	0	61	1	3	74	7_5-Jan_A_48	67.88990826	67.88990826	magic parents
Kn-0	A	5-Jan	2	No	50	48	109	109	0	61	1	4	1	7_5-Jan_A_48	0.917431193	0.917431193	magic parents
Kn-0	A	5-Jan	2	No	50	48	109	109	0	61	1	5	0	7_5-Jan_A_48	0	0	magic parents
Kn-0	A	5-Jan	2	No	50	48	109	109	0	61	1	6	0	7_5-Jan_A_48	0	0	magic parents
Kn-0	B	11-Dec	1	No	25	23	105	105	0	58	2	1	0	7_11-Dec_B_23	0	0	magic parents
Kn-0	B	11-Dec	1	No	25	23	105	105	0	58	2	2	0	7_11-Dec_B_23	0	0	magic parents
Kn-0	B	11-Dec	1	No	25	23	105	105	0	58	2	3	55	7_11-Dec_B_23	52.38095238	52.38095238	magic parents
Kn-0	B	11-Dec	1	No	25	23	105	105	0	58	2	4	48	7_11-Dec_B_23	45.71428571	45.71428571	magic parents
Kn-0	B	11-Dec	1	No	25	23	105	105	0	58	2	5	1	7_11-Dec_B_23	0.952380952	0.952380952	magic parents
Kn-0	B	11-Dec	1	No	25	23	105	105	0	58	2	6	1	7_11-Dec_B_23	0.952380952	0.952380952	magic parents
Kn-0	B	5-Jan	2	No	50	48	107	107	0	62	2	1	0	7_5-Jan_B_48	0	0	magic parents
Kn-0	B	5-Jan	2	No	50	48	107	107	0	62	2	2	17	7_5-Jan_B_48	15.88785047	15.88785047	magic parents
Kn-0	B	5-Jan	2	No	50	48	107	107	0	62	2	3	89	7_5-Jan_B_48	83.17757009	83.17757009	magic parents
Kn-0	B	5-Jan	2	No	50	48	107	107	0	62	2	4	1	7_5-Jan_B_48	0.934579439	0.934579439	magic parents
Kn-0	B	5-Jan	2	No	50	48	107	107	0	62	2	5	0	7_5-Jan_B_48	0	0	magic parents
Kn-0	B	5-Jan	2	No	50	48	107	107	0	62	2	6	0	7_5-Jan_B_48	0	0	magic parents
Kn-0	C	11-Dec	1	No	21	23	116	116	0	59	3	1	0	7_11-Dec_C_23	0	0	magic parents
Kn-0	C	11-Dec	1	No	21	23	116	116	0	59	3	2	0	7_11-Dec_C_23	0	0	magic parents
Kn-0	C	11-Dec	1	No	21	23	116	116	0	59	3	3	93	7_11-Dec_C_23	80.17241379	80.17241379	magic parents
Kn-0	C	11-Dec	1	No	21	23	116	116	0	59	3	4	23	7_11-Dec_C_23	19.82758621	19.82758621	magic parents
Kn-0	C	11-Dec	1	No	21	23	116	116	0	59	3	5	0	7_11-Dec_C_23	0	0	magic parents
Kn-0	C	11-Dec	1	No	21	23	116	116	0	59	3	6	0	7_11-Dec_C_23	0	0	magic parents
Kn-0	C	5-Jan	2	No	46	48	111	111	0	63	3	1	0	7_5-Jan_C_48	0	0	magic parents
Kn-0	C	5-Jan	2	No	46	48	111	111	0	63	3	2	24	7_5-Jan_C_48	21.62162162	21.62162162	magic parents
Kn-0	C	5-Jan	2	No	46	48	111	111	0	63	3	3	87	7_5-Jan_C_48	78.37837838	78.37837838	magic parents
Kn-0	C	5-Jan	2	No	46	48	111	111	0	63	3	4	0	7_5-Jan_C_48	0	0	magic parents
Kn-0	C	5-Jan	2	No	46	48	111	111	0	63	3	5	0	7_5-Jan_C_48	0	0	magic parents
Kn-0	C	5-Jan	2	No	46	48	111	111	0	63	3	6	0	7_5-Jan_C_48	0	0	magic parents
Kn-0	D	11-Dec	1	No	21	23	104	105	1	60	4	1	0	7_11-Dec_D_23	0	0	magic parents
Kn-0	D	11-Dec	1	No	21	23	104	105	1	60	4	2	3	7_11-Dec_D_23	2.857142857	2.884615385	magic parents
Kn-0	D	11-Dec	1	No	21	23	104	105	1	60	4	3	78	7_11-Dec_D_23	74.28571429	75	magic parents
Kn-0	D	11-Dec	1	No	21	23	104	105	1	60	4	4	20	7_11-Dec_D_23	19.04761905	19.23076923	magic parents
Kn-0	D	11-Dec	1	No	21	23	104	105	1	60	4	5	3	7_11-Dec_D_23	2.857142857	2.884615385	magic parents
Kn-0	D	11-Dec	1	No	21	23	104	105	1	60	4	6	0	7_11-Dec_D_23	0	0	magic parents
Kn-0	D	5-Jan	2	No	46	48	94	98	4	64	4	1	0	7_5-Jan_D_48	0	0	magic parents
Kn-0	D	5-Jan	2	No	46	48	94	98	4	64	4	2	44	7_5-Jan_D_48	44.89795918	46.80851064	magic parents
Kn-0	D	5-Jan	2	No	46	48	94	98	4	64	4	3	46	7_5-Jan_D_48	46.93877551	48.93617021	magic parents
Kn-0	D	5-Jan	2	No	46	48	94	98	4	64	4	4	4	7_5-Jan_D_48	4.081632653	4.255319149	magic parents
Kn-0	D	5-Jan	2	No	46	48	94	98	4	64	4	5	0	7_5-Jan_D_48	0	0	magic parents
Kn-0	D	5-Jan	2	No	46	48	94	98	4	64	4	6	0	7_5-Jan_D_48	0	0	magic parents
Ler-0	1A	26-Oct	1	No	28	28	113	113	0	65	1	1	0	8_26-Oct_1A_28	0	0	magic parents
Ler-0	1A	26-Oct	1	No	28	28	113	113	0	65	1	2	0	8_26-Oct_1A_28	0	0	magic parents
Ler-0	1A	26-Oct	1	No	28	28	113	113	0	65	1	3	67	8_26-Oct_1A_28	59.2920354	59.2920354	magic parents
Ler-0	1A	26-Oct	1	No	28	28	113	113	0	65	1	4	34	8_26-Oct_1A_28	30.08849558	30.08849558	magic parents
Ler-0	1A	26-Oct	1	No	28	28	113	113	0	65	1	5	7	8_26-Oct_1A_28	6.194690265	6.194690265	magic parents
Ler-0	1A	26-Oct	1	No	28	28	113	113	0	65	1	6	5	8_26-Oct_1A_28	4.424778761	4.424778761	magic parents
Ler-0	1A	26-Oct	1	No	28	28	113	113	0	65	1	7	0	8_26-Oct_1A_28	0	0	magic parents
Ler-0	1A	9-Nov	2	No	42	42	108	113	5	69	1	1	0	8_9-Nov_1A_42	0	0	magic parents
Ler-0	1A	9-Nov	2	No	42	42	108	113	5	69	1	2	1	8_9-Nov_1A_42	0.884955752	0.925925926	magic parents
Ler-0	1A	9-Nov	2	No	42	42	108	113	5	69	1	3	49	8_9-Nov_1A_42	43.36283186	45.37037037	magic parents
Ler-0	1A	9-Nov	2	No	42	42	108	113	5	69	1	4	39	8_9-Nov_1A_42	34.51327434	36.11111111	magic parents
Ler-0	1A	9-Nov	2	No	42	42	108	113	5	69	1	5	11	8_9-Nov_1A_42	9.734513274	10.18518519	magic parents
Ler-0	1A	9-Nov	2	No	42	42	108	113	5	69	1	6	7	8_9-Nov_1A_42	6.194690265	6.481481481	magic parents
Ler-0	1A	9-Nov	2	No	42	42	108	113	5	69	1	7	1	8_9-Nov_1A_42	0.884955752	0.925925926	magic parents
Ler-0	1A	23-Nov	3	No	56	56	116	116	0	73	1	1	0	8_23-Nov_1A_56	0	0	magic parents
Ler-0	1A	23-Nov	3	No	56	56	116	116	0	73	1	2	0	8_23-Nov_1A_56	0	0	magic parents
Ler-0	1A	23-Nov	3	No	56	56	116	116	0	73	1	3	55	8_23-Nov_1A_56	47.4137931	47.4137931	magic parents
Ler-0	1A	23-Nov	3	No	56	56	116	116	0	73	1	4	56	8_23-Nov_1A_56	48.27586207	48.27586207	magic parents
Ler-0	1A	23-Nov	3	No	56	56	116	116	0	73	1	5	5	8_23-Nov_1A_56	4.310344828	4.310344828	magic parents
Ler-0	1A	23-Nov	3	No	56	56	116	116	0	73	1	6	0	8_23-Nov_1A_56	0	0	magic parents
Ler-0	1A	23-Nov	3	No	56	56	116	116	0	73	1	7	0	8_23-Nov_1A_56	0	0	magic parents
Ler-0	1B	26-Oct	1	No	28	28	124	124	0	66	2	1	0	8_26-Oct_1B_28	0	0	magic parents
Ler-0	1B	26-Oct	1	No	28	28	124	124	0	66	2	2	0	8_26-Oct_1B_28	0	0	magic parents
Ler-0	1B	26-Oct	1	No	28	28	124	124	0	66	2	3	93	8_26-Oct_1B_28	75	75	magic parents
Ler-0	1B	26-Oct	1	No	28	28	124	124	0	66	2	4	29	8_26-Oct_1B_28	23.38709677	23.38709677	magic parents
Ler-0	1B	26-Oct	1	No	28	28	124	124	0	66	2	5	2	8_26-Oct_1B_28	1.612903226	1.612903226	magic parents
Ler-0	1B	26-Oct	1	No	28	28	124	124	0	66	2	6	0	8_26-Oct_1B_28	0	0	magic parents
Ler-0	1B	26-Oct	1	No	28	28	124	124	0	66	2	7	0	8_26-Oct_1B_28	0	0	magic parents
Ler-0	1B	9-Nov	2	No	42	42	106	125	19	70	2	1	0	8_9-Nov_1B_42	0	0	magic parents
Ler-0	1B	9-Nov	2	No	42	42	106	125	19	70	2	2	0	8_9-Nov_1B_42	0	0	magic parents
Ler-0	1B	9-Nov	2	No	42	42	106	125	19	70	2	3	76	8_9-Nov_1B_42	60.8	71.69811321	magic parents
Ler-0	1B	9-Nov	2	No	42	42	106	125	19	70	2	4	27	8_9-Nov_1B_42	21.6	25.47169811	magic parents
Ler-0	1B	9-Nov	2	No	42	42	106	125	19	70	2	5	0	8_9-Nov_1B_42	0	0	magic parents
Ler-0	1B	9-Nov	2	No	42	42	106	125	19	70	2	6	1	8_9-Nov_1B_42	0.8	0.943396226	magic parents
Ler-0	1B	9-Nov	2	No	42	42	106	125	19	70	2	7	2	8_9-Nov_1B_42	1.6	1.886792453	magic parents
Ler-0	1B	23-Nov	3	No	56	56	113	113	0	74	2	1	0	8_23-Nov_1B_56	0	0	magic parents
Ler-0	1B	23-Nov	3	No	56	56	113	113	0	74	2	2	0	8_23-Nov_1B_56	0	0	magic parents
Ler-0	1B	23-Nov	3	No	56	56	113	113	0	74	2	3	98	8_23-Nov_1B_56	86.72566372	86.72566372	magic parents
Ler-0	1B	23-Nov	3	No	56	56	113	113	0	74	2	4	14	8_23-Nov_1B_56	12.38938053	12.38938053	magic parents
Ler-0	1B	23-Nov	3	No	56	56	113	113	0	74	2	5	1	8_23-Nov_1B_56	0.884955752	0.884955752	magic parents
Ler-0	1B	23-Nov	3	No	56	56	113	113	0	74	2	6	0	8_23-Nov_1B_56	0	0	magic parents
Ler-0	1B	23-Nov	3	No	56	56	113	113	0	74	2	7	0	8_23-Nov_1B_56	0	0	magic parents
Ler-0	2A	26-Oct	1	No	28	28	113	115	2	67	3	1	0	8_26-Oct_2A_28	0	0	magic parents
Ler-0	2A	26-Oct	1	No	28	28	113	115	2	67	3	2	1	8_26-Oct_2A_28	0.869565217	0.884955752	magic parents
Ler-0	2A	26-Oct	1	No	28	28	113	115	2	67	3	3	82	8_26-Oct_2A_28	71.30434783	72.56637168	magic parents
Ler-0	2A	26-Oct	1	No	28	28	113	115	2	67	3	4	29	8_26-Oct_2A_28	25.2173913	25.66371681	magic parents
Ler-0	2A	26-Oct	1	No	28	28	113	115	2	67	3	5	1	8_26-Oct_2A_28	0.869565217	0.884955752	magic parents
Ler-0	2A	26-Oct	1	No	28	28	113	115	2	67	3	6	0	8_26-Oct_2A_28	0	0	magic parents
Ler-0	2A	26-Oct	1	No	28	28	113	115	2	67	3	7	0	8_26-Oct_2A_28	0	0	magic parents
Ler-0	2A	9-Nov	2	No	42	42	124	124	0	71	3	1	0	8_9-Nov_2A_42	0	0	magic parents
Ler-0	2A	9-Nov	2	No	42	42	124	124	0	71	3	2	0	8_9-Nov_2A_42	0	0	magic parents
Ler-0	2A	9-Nov	2	No	42	42	124	124	0	71	3	3	79	8_9-Nov_2A_42	63.70967742	63.70967742	magic parents
Ler-0	2A	9-Nov	2	No	42	42	124	124	0	71	3	4	43	8_9-Nov_2A_42	34.67741935	34.67741935	magic parents
Ler-0	2A	9-Nov	2	No	42	42	124	124	0	71	3	5	0	8_9-Nov_2A_42	0	0	magic parents
Ler-0	2A	9-Nov	2	No	42	42	124	124	0	71	3	6	2	8_9-Nov_2A_42	1.612903226	1.612903226	magic parents
Ler-0	2A	9-Nov	2	No	42	42	124	124	0	71	3	7	0	8_9-Nov_2A_42	0	0	magic parents
Ler-0	2A	23-Nov	3	No	56	56	115	115	0	75	3	1	0	8_23-Nov_2A_56	0	0	magic parents
Ler-0	2A	23-Nov	3	No	56	56	115	115	0	75	3	2	0	8_23-Nov_2A_56	0	0	magic parents
Ler-0	2A	23-Nov	3	No	56	56	115	115	0	75	3	3	83	8_23-Nov_2A_56	72.17391304	72.17391304	magic parents
Ler-0	2A	23-Nov	3	No	56	56	115	115	0	75	3	4	32	8_23-Nov_2A_56	27.82608696	27.82608696	magic parents
Ler-0	2A	23-Nov	3	No	56	56	115	115	0	75	3	5	0	8_23-Nov_2A_56	0	0	magic parents
Ler-0	2A	23-Nov	3	No	56	56	115	115	0	75	3	6	0	8_23-Nov_2A_56	0	0	magic parents
Ler-0	2A	23-Nov	3	No	56	56	115	115	0	75	3	7	0	8_23-Nov_2A_56	0	0	magic parents
Ler-0	2B	26-Oct	1	No	28	28	118	118	0	68	4	1	0	8_26-Oct_2B_28	0	0	magic parents
Ler-0	2B	26-Oct	1	No	28	28	118	118	0	68	4	2	0	8_26-Oct_2B_28	0	0	magic parents
Ler-0	2B	26-Oct	1	No	28	28	118	118	0	68	4	3	54	8_26-Oct_2B_28	45.76271186	45.76271186	magic parents
Ler-0	2B	26-Oct	1	No	28	28	118	118	0	68	4	4	59	8_26-Oct_2B_28	50	50	magic parents
Ler-0	2B	26-Oct	1	No	28	28	118	118	0	68	4	5	5	8_26-Oct_2B_28	4.237288136	4.237288136	magic parents
Ler-0	2B	26-Oct	1	No	28	28	118	118	0	68	4	6	0	8_26-Oct_2B_28	0	0	magic parents
Ler-0	2B	26-Oct	1	No	28	28	118	118	0	68	4	7	0	8_26-Oct_2B_28	0	0	magic parents
Ler-0	2B	9-Nov	2	No	42	42	109	109	0	72	4	1	0	8_9-Nov_2B_42	0	0	magic parents
Ler-0	2B	9-Nov	2	No	42	42	109	109	0	72	4	2	0	8_9-Nov_2B_42	0	0	magic parents
Ler-0	2B	9-Nov	2	No	42	42	109	109	0	72	4	3	34	8_9-Nov_2B_42	31.19266055	31.19266055	magic parents
Ler-0	2B	9-Nov	2	No	42	42	109	109	0	72	4	4	67	8_9-Nov_2B_42	61.46788991	61.46788991	magic parents
Ler-0	2B	9-Nov	2	No	42	42	109	109	0	72	4	5	6	8_9-Nov_2B_42	5.504587156	5.504587156	magic parents
Ler-0	2B	9-Nov	2	No	42	42	109	109	0	72	4	6	2	8_9-Nov_2B_42	1.834862385	1.834862385	magic parents
Ler-0	2B	9-Nov	2	No	42	42	109	109	0	72	4	7	0	8_9-Nov_2B_42	0	0	magic parents
Ler-0	2B	23-Nov	3	No	56	56	114	114	0	76	4	1	0	8_23-Nov_2B_56	0	0	magic parents
Ler-0	2B	23-Nov	3	No	56	56	114	114	0	76	4	2	0	8_23-Nov_2B_56	0	0	magic parents
Ler-0	2B	23-Nov	3	No	56	56	114	114	0	76	4	3	49	8_23-Nov_2B_56	42.98245614	42.98245614	magic parents
Ler-0	2B	23-Nov	3	No	56	56	114	114	0	76	4	4	64	8_23-Nov_2B_56	56.14035088	56.14035088	magic parents
Ler-0	2B	23-Nov	3	No	56	56	114	114	0	76	4	5	1	8_23-Nov_2B_56	0.877192982	0.877192982	magic parents
Ler-0	2B	23-Nov	3	No	56	56	114	114	0	76	4	6	0	8_23-Nov_2B_56	0	0	magic parents
Ler-0	2B	23-Nov	3	No	56	56	114	114	0	76	4	7	0	8_23-Nov_2B_56	0	0	magic parents
Mt-0	1B	3-Nov	1	No	29	29	120	122	2	77	1	1	0	9_3-Nov_1B_29	0	0	magic parents
Mt-0	1B	3-Nov	1	No	29	29	120	122	2	77	1	2	18	9_3-Nov_1B_29	14.75409836	15	magic parents
Mt-0	1B	3-Nov	1	No	29	29	120	122	2	77	1	3	98	9_3-Nov_1B_29	80.32786885	81.66666667	magic parents
Mt-0	1B	3-Nov	1	No	29	29	120	122	2	77	1	4	4	9_3-Nov_1B_29	3.278688525	3.333333333	magic parents
Mt-0	1B	3-Nov	1	No	29	29	120	122	2	77	1	5	0	9_3-Nov_1B_29	0	0	magic parents
Mt-0	1B	3-Nov	1	No	29	29	120	122	2	77	1	6	0	9_3-Nov_1B_29	0	0	magic parents
Mt-0	1B	17-Nov	2	No	43	43	107	108	1	80	1	1	0	9_17-Nov_1B_43	0	0	magic parents
Mt-0	1B	17-Nov	2	No	43	43	107	108	1	80	1	2	6	9_17-Nov_1B_43	5.555555556	5.607476636	magic parents
Mt-0	1B	17-Nov	2	No	43	43	107	108	1	80	1	3	100	9_17-Nov_1B_43	92.59259259	93.45794393	magic parents
Mt-0	1B	17-Nov	2	No	43	43	107	108	1	80	1	4	0	9_17-Nov_1B_43	0	0	magic parents
Mt-0	1B	17-Nov	2	No	43	43	107	108	1	80	1	5	1	9_17-Nov_1B_43	0.925925926	0.934579439	magic parents
Mt-0	1B	17-Nov	2	No	43	43	107	108	1	80	1	6	0	9_17-Nov_1B_43	0	0	magic parents
Mt-0	1B	30-Nov	3	No	56	56	112	112	0	83	1	1	0	9_30-Nov_1B_56	0	0	magic parents
Mt-0	1B	30-Nov	3	No	56	56	112	112	0	83	1	2	0	9_30-Nov_1B_56	0	0	magic parents
Mt-0	1B	30-Nov	3	No	56	56	112	112	0	83	1	3	109	9_30-Nov_1B_56	97.32142857	97.32142857	magic parents
Mt-0	1B	30-Nov	3	No	56	56	112	112	0	83	1	4	3	9_30-Nov_1B_56	2.678571429	2.678571429	magic parents
Mt-0	1B	30-Nov	3	No	56	56	112	112	0	83	1	5	0	9_30-Nov_1B_56	0	0	magic parents
Mt-0	1B	30-Nov	3	No	56	56	112	112	0	83	1	6	0	9_30-Nov_1B_56	0	0	magic parents
Mt-0	3A	3-Nov	1	No	29	29	118	120	2	78	2	1	0	9_3-Nov_3A_29	0	0	magic parents
Mt-0	3A	3-Nov	1	No	29	29	118	120	2	78	2	2	57	9_3-Nov_3A_29	47.5	48.30508475	magic parents
Mt-0	3A	3-Nov	1	No	29	29	118	120	2	78	2	3	53	9_3-Nov_3A_29	44.16666667	44.91525424	magic parents
Mt-0	3A	3-Nov	1	No	29	29	118	120	2	78	2	4	7	9_3-Nov_3A_29	5.833333333	5.93220339	magic parents
Mt-0	3A	3-Nov	1	No	29	29	118	120	2	78	2	5	0	9_3-Nov_3A_29	0	0	magic parents
Mt-0	3A	3-Nov	1	No	29	29	118	120	2	78	2	6	1	9_3-Nov_3A_29	0.833333333	0.847457627	magic parents
Mt-0	3A	17-Nov	2	No	43	43	109	109	0	81	2	1	0	9_17-Nov_3A_43	0	0	magic parents
Mt-0	3A	17-Nov	2	No	43	43	109	109	0	81	2	2	47	9_17-Nov_3A_43	43.11926606	43.11926606	magic parents
Mt-0	3A	17-Nov	2	No	43	43	109	109	0	81	2	3	60	9_17-Nov_3A_43	55.04587156	55.04587156	magic parents
Mt-0	3A	17-Nov	2	No	43	43	109	109	0	81	2	4	2	9_17-Nov_3A_43	1.834862385	1.834862385	magic parents
Mt-0	3A	17-Nov	2	No	43	43	109	109	0	81	2	5	0	9_17-Nov_3A_43	0	0	magic parents
Mt-0	3A	17-Nov	2	No	43	43	109	109	0	81	2	6	0	9_17-Nov_3A_43	0	0	magic parents
Mt-0	3A	30-Nov	3	No	56	56	109	110	1	84	2	1	0	9_30-Nov_3A_56	0	0	magic parents
Mt-0	3A	30-Nov	3	No	56	56	109	110	1	84	2	2	20	9_30-Nov_3A_56	18.18181818	18.34862385	magic parents
Mt-0	3A	30-Nov	3	No	56	56	109	110	1	84	2	3	86	9_30-Nov_3A_56	78.18181818	78.89908257	magic parents
Mt-0	3A	30-Nov	3	No	56	56	109	110	1	84	2	4	2	9_30-Nov_3A_56	1.818181818	1.834862385	magic parents
Mt-0	3A	30-Nov	3	No	56	56	109	110	1	84	2	5	1	9_30-Nov_3A_56	0.909090909	0.917431193	magic parents
Mt-0	3A	30-Nov	3	No	56	56	109	110	1	84	2	6	0	9_30-Nov_3A_56	0	0	magic parents
Mt-0	3B	3-Nov	1	No	29	29	127	127	0	79	3	1	0	9_3-Nov_3B_29	0	0	magic parents
Mt-0	3B	3-Nov	1	No	29	29	127	127	0	79	3	2	49	9_3-Nov_3B_29	38.58267717	38.58267717	magic parents
Mt-0	3B	3-Nov	1	No	29	29	127	127	0	79	3	3	69	9_3-Nov_3B_29	54.33070866	54.33070866	magic parents
Mt-0	3B	3-Nov	1	No	29	29	127	127	0	79	3	4	9	9_3-Nov_3B_29	7.086614173	7.086614173	magic parents
Mt-0	3B	3-Nov	1	No	29	29	127	127	0	79	3	5	0	9_3-Nov_3B_29	0	0	magic parents
Mt-0	3B	3-Nov	1	No	29	29	127	127	0	79	3	6	0	9_3-Nov_3B_29	0	0	magic parents
Mt-0	3B	17-Nov	2	No	43	43	109	109	0	82	3	1	0	9_17-Nov_3B_43	0	0	magic parents
Mt-0	3B	17-Nov	2	No	43	43	109	109	0	82	3	2	34	9_17-Nov_3B_43	31.19266055	31.19266055	magic parents
Mt-0	3B	17-Nov	2	No	43	43	109	109	0	82	3	3	74	9_17-Nov_3B_43	67.88990826	67.88990826	magic parents
Mt-0	3B	17-Nov	2	No	43	43	109	109	0	82	3	4	0	9_17-Nov_3B_43	0	0	magic parents
Mt-0	3B	17-Nov	2	No	43	43	109	109	0	82	3	5	1	9_17-Nov_3B_43	0.917431193	0.917431193	magic parents
Mt-0	3B	17-Nov	2	No	43	43	109	109	0	82	3	6	0	9_17-Nov_3B_43	0	0	magic parents
Mt-0	3B	30-Nov	3	No	56	56	117	119	2	85	3	1	0	9_30-Nov_3B_56	0	0	magic parents
Mt-0	3B	30-Nov	3	No	56	56	117	119	2	85	3	2	7	9_30-Nov_3B_56	5.882352941	5.982905983	magic parents
Mt-0	3B	30-Nov	3	No	56	56	117	119	2	85	3	3	108	9_30-Nov_3B_56	90.75630252	92.30769231	magic parents
Mt-0	3B	30-Nov	3	No	56	56	117	119	2	85	3	4	1	9_30-Nov_3B_56	0.840336134	0.854700855	magic parents
Mt-0	3B	30-Nov	3	No	56	56	117	119	2	85	3	5	1	9_30-Nov_3B_56	0.840336134	0.854700855	magic parents
Mt-0	3B	30-Nov	3	No	56	56	117	119	2	85	3	6	0	9_30-Nov_3B_56	0	0	magic parents
No-0	1B	3-Nov	1	No	26	26	114	118	4	86	1	1	0	10_3-Nov_1B_26	0	0	magic parents
No-0	1B	3-Nov	1	No	26	26	114	118	4	86	1	2	60	10_3-Nov_1B_26	50.84745763	52.63157895	magic parents
No-0	1B	3-Nov	1	No	26	26	114	118	4	86	1	3	48	10_3-Nov_1B_26	40.6779661	42.10526316	magic parents
No-0	1B	3-Nov	1	No	26	26	114	118	4	86	1	4	6	10_3-Nov_1B_26	5.084745763	5.263157895	magic parents
No-0	1B	3-Nov	1	No	26	26	114	118	4	86	1	5	0	10_3-Nov_1B_26	0	0	magic parents
No-0	1B	3-Nov	1	No	26	26	114	118	4	86	1	6	0	10_3-Nov_1B_26	0	0	magic parents
No-0	1B	3-Nov	1	No	26	26	114	118	4	86	1	7	0	10_3-Nov_1B_26	0	0	magic parents
No-0	1B	3-Nov	1	No	26	26	114	118	4	86	1	8	0	10_3-Nov_1B_26	0	0	magic parents
No-0	1B	3-Nov	1	No	26	26	114	118	4	86	1	9	0	10_3-Nov_1B_26	0	0	magic parents
No-0	1B	17-Nov	2	No	40	40	112	114	2	90	1	1	0	10_17-Nov_1B_40	0	0	magic parents
No-0	1B	17-Nov	2	No	40	40	112	114	2	90	1	2	31	10_17-Nov_1B_40	27.19298246	27.67857143	magic parents
No-0	1B	17-Nov	2	No	40	40	112	114	2	90	1	3	70	10_17-Nov_1B_40	61.40350877	62.5	magic parents
No-0	1B	17-Nov	2	No	40	40	112	114	2	90	1	4	9	10_17-Nov_1B_40	7.894736842	8.035714286	magic parents
No-0	1B	17-Nov	2	No	40	40	112	114	2	90	1	5	1	10_17-Nov_1B_40	0.877192982	0.892857143	magic parents
No-0	1B	17-Nov	2	No	40	40	112	114	2	90	1	6	1	10_17-Nov_1B_40	0.877192982	0.892857143	magic parents
No-0	1B	17-Nov	2	No	40	40	112	114	2	90	1	7	0	10_17-Nov_1B_40	0	0	magic parents
No-0	1B	17-Nov	2	No	40	40	112	114	2	90	1	8	0	10_17-Nov_1B_40	0	0	magic parents
No-0	1B	17-Nov	2	No	40	40	112	114	2	90	1	9	0	10_17-Nov_1B_40	0	0	magic parents
No-0	1B	30-Nov	3	No	53	53	98	107	9	93	1	1	0	10_30-Nov_1B_53	0	0	magic parents
No-0	1B	30-Nov	3	No	53	53	98	107	9	93	1	2	23	10_30-Nov_1B_53	21.4953271	23.46938776	magic parents
No-0	1B	30-Nov	3	No	53	53	98	107	9	93	1	3	64	10_30-Nov_1B_53	59.81308411	65.30612245	magic parents
No-0	1B	30-Nov	3	No	53	53	98	107	9	93	1	4	11	10_30-Nov_1B_53	10.28037383	11.2244898	magic parents
No-0	1B	30-Nov	3	No	53	53	98	107	9	93	1	5	0	10_30-Nov_1B_53	0	0	magic parents
No-0	1B	30-Nov	3	No	53	53	98	107	9	93	1	6	0	10_30-Nov_1B_53	0	0	magic parents
No-0	1B	30-Nov	3	No	53	53	98	107	9	93	1	7	0	10_30-Nov_1B_53	0	0	magic parents
No-0	1B	30-Nov	3	No	53	53	98	107	9	93	1	8	0	10_30-Nov_1B_53	0	0	magic parents
No-0	1B	30-Nov	3	No	53	53	98	107	9	93	1	9	0	10_30-Nov_1B_53	0	0	magic parents
No-0	2A	3-Nov	1	No	26	26	107	112	5	87	2	1	0	10_3-Nov_2A_26	0	0	magic parents
No-0	2A	3-Nov	1	No	26	26	107	112	5	87	2	2	43	10_3-Nov_2A_26	38.39285714	40.18691589	magic parents
No-0	2A	3-Nov	1	No	26	26	107	112	5	87	2	3	46	10_3-Nov_2A_26	41.07142857	42.99065421	magic parents
No-0	2A	3-Nov	1	No	26	26	107	112	5	87	2	4	14	10_3-Nov_2A_26	12.5	13.08411215	magic parents
No-0	2A	3-Nov	1	No	26	26	107	112	5	87	2	5	2	10_3-Nov_2A_26	1.785714286	1.869158879	magic parents
No-0	2A	3-Nov	1	No	26	26	107	112	5	87	2	6	1	10_3-Nov_2A_26	0.892857143	0.934579439	magic parents
No-0	2A	3-Nov	1	No	26	26	107	112	5	87	2	7	1	10_3-Nov_2A_26	0.892857143	0.934579439	magic parents
No-0	2A	3-Nov	1	No	26	26	107	112	5	87	2	8	0	10_3-Nov_2A_26	0	0	magic parents
No-0	2A	3-Nov	1	No	26	26	107	112	5	87	2	9	0	10_3-Nov_2A_26	0	0	magic parents
No-0	2A	17-Nov	2	No	40	40	101	103	2	91	2	1	0	10_17-Nov_2A_40	0	0	magic parents
No-0	2A	17-Nov	2	No	40	40	101	103	2	91	2	2	18	10_17-Nov_2A_40	17.47572816	17.82178218	magic parents
No-0	2A	17-Nov	2	No	40	40	101	103	2	91	2	3	58	10_17-Nov_2A_40	56.31067961	57.42574257	magic parents
No-0	2A	17-Nov	2	No	40	40	101	103	2	91	2	4	16	10_17-Nov_2A_40	15.53398058	15.84158416	magic parents
No-0	2A	17-Nov	2	No	40	40	101	103	2	91	2	5	9	10_17-Nov_2A_40	8.737864078	8.910891089	magic parents
No-0	2A	17-Nov	2	No	40	40	101	103	2	91	2	6	0	10_17-Nov_2A_40	0	0	magic parents
No-0	2A	17-Nov	2	No	40	40	101	103	2	91	2	7	0	10_17-Nov_2A_40	0	0	magic parents
No-0	2A	17-Nov	2	No	40	40	101	103	2	91	2	8	0	10_17-Nov_2A_40	0	0	magic parents
No-0	2A	17-Nov	2	No	40	40	101	103	2	91	2	9	0	10_17-Nov_2A_40	0	0	magic parents
No-0	2A	30-Nov	3	No	53	53	96	99	3	94	2	1	0	10_30-Nov_2A_53	0	0	magic parents
No-0	2A	30-Nov	3	No	53	53	96	99	3	94	2	2	15	10_30-Nov_2A_53	15.15151515	15.625	magic parents
No-0	2A	30-Nov	3	No	53	53	96	99	3	94	2	3	55	10_30-Nov_2A_53	55.55555556	57.29166667	magic parents
No-0	2A	30-Nov	3	No	53	53	96	99	3	94	2	4	18	10_30-Nov_2A_53	18.18181818	18.75	magic parents
No-0	2A	30-Nov	3	No	53	53	96	99	3	94	2	5	4	10_30-Nov_2A_53	4.04040404	4.166666667	magic parents
No-0	2A	30-Nov	3	No	53	53	96	99	3	94	2	6	1	10_30-Nov_2A_53	1.01010101	1.041666667	magic parents
No-0	2A	30-Nov	3	No	53	53	96	99	3	94	2	7	1	10_30-Nov_2A_53	1.01010101	1.041666667	magic parents
No-0	2A	30-Nov	3	No	53	53	96	99	3	94	2	8	0	10_30-Nov_2A_53	0	0	magic parents
No-0	2A	30-Nov	3	No	53	53	96	99	3	94	2	9	2	10_30-Nov_2A_53	2.02020202	2.083333333	magic parents
No-0	2B	3-Nov	1	No	26	26	110	113	3	88	3	1	0	10_3-Nov_2B_26	0	0	magic parents
No-0	2B	3-Nov	1	No	26	26	110	113	3	88	3	2	28	10_3-Nov_2B_26	24.77876106	25.45454545	magic parents
No-0	2B	3-Nov	1	No	26	26	110	113	3	88	3	3	63	10_3-Nov_2B_26	55.75221239	57.27272727	magic parents
No-0	2B	3-Nov	1	No	26	26	110	113	3	88	3	4	9	10_3-Nov_2B_26	7.96460177	8.181818182	magic parents
No-0	2B	3-Nov	1	No	26	26	110	113	3	88	3	5	5	10_3-Nov_2B_26	4.424778761	4.545454545	magic parents
No-0	2B	3-Nov	1	No	26	26	110	113	3	88	3	6	4	10_3-Nov_2B_26	3.539823009	3.636363636	magic parents
No-0	2B	3-Nov	1	No	26	26	110	113	3	88	3	7	1	10_3-Nov_2B_26	0.884955752	0.909090909	magic parents
No-0	2B	3-Nov	1	No	26	26	110	113	3	88	3	8	0	10_3-Nov_2B_26	0	0	magic parents
No-0	2B	3-Nov	1	No	26	26	110	113	3	88	3	9	0	10_3-Nov_2B_26	0	0	magic parents
No-0	2B	17-Nov	2	No	40	40	114	120	6	92	3	1	0	10_17-Nov_2B_40	0	0	magic parents
No-0	2B	17-Nov	2	No	40	40	114	120	6	92	3	2	18	10_17-Nov_2B_40	15	15.78947368	magic parents
No-0	2B	17-Nov	2	No	40	40	114	120	6	92	3	3	71	10_17-Nov_2B_40	59.16666667	62.28070175	magic parents
No-0	2B	17-Nov	2	No	40	40	114	120	6	92	3	4	17	10_17-Nov_2B_40	14.16666667	14.9122807	magic parents
No-0	2B	17-Nov	2	No	40	40	114	120	6	92	3	5	6	10_17-Nov_2B_40	5	5.263157895	magic parents
No-0	2B	17-Nov	2	No	40	40	114	120	6	92	3	6	2	10_17-Nov_2B_40	1.666666667	1.754385965	magic parents
No-0	2B	17-Nov	2	No	40	40	114	120	6	92	3	7	0	10_17-Nov_2B_40	0	0	magic parents
No-0	2B	17-Nov	2	No	40	40	114	120	6	92	3	8	0	10_17-Nov_2B_40	0	0	magic parents
No-0	2B	17-Nov	2	No	40	40	114	120	6	92	3	9	0	10_17-Nov_2B_40	0	0	magic parents
No-0	3A	3-Nov	1	No	26	26	113	116	3	89	4	1	0	10_3-Nov_3A_26	0	0	magic parents
No-0	3A	3-Nov	1	No	26	26	113	116	3	89	4	2	31	10_3-Nov_3A_26	26.72413793	27.43362832	magic parents
No-0	3A	3-Nov	1	No	26	26	113	116	3	89	4	3	62	10_3-Nov_3A_26	53.44827586	54.86725664	magic parents
No-0	3A	3-Nov	1	No	26	26	113	116	3	89	4	4	18	10_3-Nov_3A_26	15.51724138	15.92920354	magic parents
No-0	3A	3-Nov	1	No	26	26	113	116	3	89	4	5	1	10_3-Nov_3A_26	0.862068966	0.884955752	magic parents
No-0	3A	3-Nov	1	No	26	26	113	116	3	89	4	6	0	10_3-Nov_3A_26	0	0	magic parents
No-0	3A	3-Nov	1	No	26	26	113	116	3	89	4	7	1	10_3-Nov_3A_26	0.862068966	0.884955752	magic parents
No-0	3A	3-Nov	1	No	26	26	113	116	3	89	4	8	0	10_3-Nov_3A_26	0	0	magic parents
No-0	3A	3-Nov	1	No	26	26	113	116	3	89	4	9	0	10_3-Nov_3A_26	0	0	magic parents
No-0	3A	30-Nov	3	No	53	53	103	109	6	95	3	1	0	10_30-Nov_3A_53	0	0	magic parents
No-0	3A	30-Nov	3	No	53	53	103	109	6	95	3	2	11	10_30-Nov_3A_53	10.09174312	10.67961165	magic parents
No-0	3A	30-Nov	3	No	53	53	103	109	6	95	3	3	77	10_30-Nov_3A_53	70.64220183	74.75728155	magic parents
No-0	3A	30-Nov	3	No	53	53	103	109	6	95	3	4	13	10_30-Nov_3A_53	11.9266055	12.62135922	magic parents
No-0	3A	30-Nov	3	No	53	53	103	109	6	95	3	5	2	10_30-Nov_3A_53	1.834862385	1.941747573	magic parents
No-0	3A	30-Nov	3	No	53	53	103	109	6	95	3	6	0	10_30-Nov_3A_53	0	0	magic parents
No-0	3A	30-Nov	3	No	53	53	103	109	6	95	3	7	0	10_30-Nov_3A_53	0	0	magic parents
No-0	3A	30-Nov	3	No	53	53	103	109	6	95	3	8	0	10_30-Nov_3A_53	0	0	magic parents
No-0	3A	30-Nov	3	No	53	53	103	109	6	95	3	9	0	10_30-Nov_3A_53	0	0	magic parents
Oy-0	2A	3-Nov	1	No	29	27	24	124	100	96	1	1	0	11_3-Nov_2A_27	0	0	magic parents
Oy-0	2A	3-Nov	1	No	29	27	24	124	100	96	1	2	0	11_3-Nov_2A_27	0	0	magic parents
Oy-0	2A	3-Nov	1	No	29	27	24	124	100	96	1	3	12	11_3-Nov_2A_27	9.677419355	50	magic parents
Oy-0	2A	3-Nov	1	No	29	27	24	124	100	96	1	4	10	11_3-Nov_2A_27	8.064516129	41.66666667	magic parents
Oy-0	2A	3-Nov	1	No	29	27	24	124	100	96	1	5	1	11_3-Nov_2A_27	0.806451613	4.166666667	magic parents
Oy-0	2A	3-Nov	1	No	29	27	24	124	100	96	1	6	1	11_3-Nov_2A_27	0.806451613	4.166666667	magic parents
Oy-0	2A	17-Nov	2	No	43	41	4	109	105	99	1	1	0	11_17-Nov_2A_41	0	0	magic parents
Oy-0	2A	17-Nov	2	No	43	41	4	109	105	99	1	2	0	11_17-Nov_2A_41	0	0	magic parents
Oy-0	2A	17-Nov	2	No	43	41	4	109	105	99	1	3	2	11_17-Nov_2A_41	1.834862385	50	magic parents
Oy-0	2A	17-Nov	2	No	43	41	4	109	105	99	1	4	2	11_17-Nov_2A_41	1.834862385	50	magic parents
Oy-0	2A	17-Nov	2	No	43	41	4	109	105	99	1	5	0	11_17-Nov_2A_41	0	0	magic parents
Oy-0	2A	17-Nov	2	No	43	41	4	109	105	99	1	6	0	11_17-Nov_2A_41	0	0	magic parents
Oy-0	2A	30-Nov	3	No	56	54	20	100	80	102	1	1	0	11_30-Nov_2A_54	0	0	magic parents
Oy-0	2A	30-Nov	3	No	56	54	20	100	80	102	1	2	0	11_30-Nov_2A_54	0	0	magic parents
Oy-0	2A	30-Nov	3	No	56	54	20	100	80	102	1	3	12	11_30-Nov_2A_54	12	60	magic parents
Oy-0	2A	30-Nov	3	No	56	54	20	100	80	102	1	4	8	11_30-Nov_2A_54	8	40	magic parents
Oy-0	2A	30-Nov	3	No	56	54	20	100	80	102	1	5	0	11_30-Nov_2A_54	0	0	magic parents
Oy-0	2A	30-Nov	3	No	56	54	20	100	80	102	1	6	0	11_30-Nov_2A_54	0	0	magic parents
Oy-0	2B	3-Nov	1	No	26	27	48	120	72	97	2	1	0	11_3-Nov_2B_27	0	0	magic parents
Oy-0	2B	3-Nov	1	No	26	27	48	120	72	97	2	2	15	11_3-Nov_2B_27	12.5	31.25	magic parents
Oy-0	2B	3-Nov	1	No	26	27	48	120	72	97	2	3	15	11_3-Nov_2B_27	12.5	31.25	magic parents
Oy-0	2B	3-Nov	1	No	26	27	48	120	72	97	2	4	18	11_3-Nov_2B_27	15	37.5	magic parents
Oy-0	2B	3-Nov	1	No	26	27	48	120	72	97	2	5	0	11_3-Nov_2B_27	0	0	magic parents
Oy-0	2B	3-Nov	1	No	26	27	48	120	72	97	2	6	0	11_3-Nov_2B_27	0	0	magic parents
Oy-0	2B	17-Nov	2	No	40	41	18	100	82	100	2	1	0	11_17-Nov_2B_41	0	0	magic parents
Oy-0	2B	17-Nov	2	No	40	41	18	100	82	100	2	2	2	11_17-Nov_2B_41	2	11.11111111	magic parents
Oy-0	2B	17-Nov	2	No	40	41	18	100	82	100	2	3	8	11_17-Nov_2B_41	8	44.44444444	magic parents
Oy-0	2B	17-Nov	2	No	40	41	18	100	82	100	2	4	3	11_17-Nov_2B_41	3	16.66666667	magic parents
Oy-0	2B	17-Nov	2	No	40	41	18	100	82	100	2	5	4	11_17-Nov_2B_41	4	22.22222222	magic parents
Oy-0	2B	17-Nov	2	No	40	41	18	100	82	100	2	6	1	11_17-Nov_2B_41	1	5.555555556	magic parents
Oy-0	2B	30-Nov	3	No	53	54	29	105	76	103	2	1	0	11_30-Nov_2B_54	0	0	magic parents
Oy-0	2B	30-Nov	3	No	53	54	29	105	76	103	2	2	1	11_30-Nov_2B_54	0.952380952	3.448275862	magic parents
Oy-0	2B	30-Nov	3	No	53	54	29	105	76	103	2	3	17	11_30-Nov_2B_54	16.19047619	58.62068966	magic parents
Oy-0	2B	30-Nov	3	No	53	54	29	105	76	103	2	4	9	11_30-Nov_2B_54	8.571428571	31.03448276	magic parents
Oy-0	2B	30-Nov	3	No	53	54	29	105	76	103	2	5	1	11_30-Nov_2B_54	0.952380952	3.448275862	magic parents
Oy-0	2B	30-Nov	3	No	53	54	29	105	76	103	2	6	1	11_30-Nov_2B_54	0.952380952	3.448275862	magic parents
Oy-0	3A	3-Nov	1	No	26	27	16	114	98	98	3	1	0	11_3-Nov_3A_27	0	0	magic parents
Oy-0	3A	3-Nov	1	No	26	27	16	114	98	98	3	2	3	11_3-Nov_3A_27	2.631578947	18.75	magic parents
Oy-0	3A	3-Nov	1	No	26	27	16	114	98	98	3	3	5	11_3-Nov_3A_27	4.385964912	31.25	magic parents
Oy-0	3A	3-Nov	1	No	26	27	16	114	98	98	3	4	8	11_3-Nov_3A_27	7.01754386	50	magic parents
Oy-0	3A	3-Nov	1	No	26	27	16	114	98	98	3	5	0	11_3-Nov_3A_27	0	0	magic parents
Oy-0	3A	3-Nov	1	No	26	27	16	114	98	98	3	6	0	11_3-Nov_3A_27	0	0	magic parents
Oy-0	3A	17-Nov	2	No	40	41	3	98	95	101	3	1	0	11_17-Nov_3A_41	0	0	magic parents
Oy-0	3A	17-Nov	2	No	40	41	3	98	95	101	3	2	1	11_17-Nov_3A_41	1.020408163	33.33333333	magic parents
Oy-0	3A	17-Nov	2	No	40	41	3	98	95	101	3	3	2	11_17-Nov_3A_41	2.040816327	66.66666667	magic parents
Oy-0	3A	17-Nov	2	No	40	41	3	98	95	101	3	4	0	11_17-Nov_3A_41	0	0	magic parents
Oy-0	3A	17-Nov	2	No	40	41	3	98	95	101	3	5	0	11_17-Nov_3A_41	0	0	magic parents
Oy-0	3A	17-Nov	2	No	40	41	3	98	95	101	3	6	0	11_17-Nov_3A_41	0	0	magic parents
Oy-0	3A	30-Nov	3	No	53	54	3	106	103	104	3	1	0	11_30-Nov_3A_54	0	0	magic parents
Oy-0	3A	30-Nov	3	No	53	54	3	106	103	104	3	2	0	11_30-Nov_3A_54	0	0	magic parents
Oy-0	3A	30-Nov	3	No	53	54	3	106	103	104	3	3	3	11_30-Nov_3A_54	2.830188679	100	magic parents
Oy-0	3A	30-Nov	3	No	53	54	3	106	103	104	3	4	0	11_30-Nov_3A_54	0	0	magic parents
Oy-0	3A	30-Nov	3	No	53	54	3	106	103	104	3	5	0	11_30-Nov_3A_54	0	0	magic parents
Oy-0	3A	30-Nov	3	No	53	54	3	106	103	104	3	6	0	11_30-Nov_3A_54	0	0	magic parents
Po-0	2B	3-Nov	1	No	26	28	93	130	37	105	1	1	0	12_3-Nov_2B_28	0	0	magic parents
Po-0	2B	3-Nov	1	No	26	28	93	130	37	105	1	2	40	12_3-Nov_2B_28	30.76923077	43.01075269	magic parents
Po-0	2B	3-Nov	1	No	26	28	93	130	37	105	1	3	34	12_3-Nov_2B_28	26.15384615	36.55913978	magic parents
Po-0	2B	3-Nov	1	No	26	28	93	130	37	105	1	4	13	12_3-Nov_2B_28	10	13.97849462	magic parents
Po-0	2B	3-Nov	1	No	26	28	93	130	37	105	1	5	6	12_3-Nov_2B_28	4.615384615	6.451612903	magic parents
Po-0	2B	3-Nov	1	No	26	28	93	130	37	105	1	6	0	12_3-Nov_2B_28	0	0	magic parents
Po-0	2B	3-Nov	1	No	26	28	93	130	37	105	1	7	0	12_3-Nov_2B_28	0	0	magic parents
Po-0	2B	3-Nov	1	No	26	28	93	130	37	105	1	8	0	12_3-Nov_2B_28	0	0	magic parents
Po-0	2B	3-Nov	1	No	26	28	93	130	37	105	1	9	0	12_3-Nov_2B_28	0	0	magic parents
Po-0	2B	17-Nov	2	No	40	42	69	112	43	108	1	1	0	12_17-Nov_2B_42	0	0	magic parents
Po-0	2B	17-Nov	2	No	40	42	69	112	43	108	1	2	25	12_17-Nov_2B_42	22.32142857	36.23188406	magic parents
Po-0	2B	17-Nov	2	No	40	42	69	112	43	108	1	3	35	12_17-Nov_2B_42	31.25	50.72463768	magic parents
Po-0	2B	17-Nov	2	No	40	42	69	112	43	108	1	4	6	12_17-Nov_2B_42	5.357142857	8.695652174	magic parents
Po-0	2B	17-Nov	2	No	40	42	69	112	43	108	1	5	3	12_17-Nov_2B_42	2.678571429	4.347826087	magic parents
Po-0	2B	17-Nov	2	No	40	42	69	112	43	108	1	6	0	12_17-Nov_2B_42	0	0	magic parents
Po-0	2B	17-Nov	2	No	40	42	69	112	43	108	1	7	0	12_17-Nov_2B_42	0	0	magic parents
Po-0	2B	17-Nov	2	No	40	42	69	112	43	108	1	8	0	12_17-Nov_2B_42	0	0	magic parents
Po-0	2B	17-Nov	2	No	40	42	69	112	43	108	1	9	0	12_17-Nov_2B_42	0	0	magic parents
Po-0	2B	30-Nov	3	No	53	55	67	107	40	111	1	1	0	12_30-Nov_2B_55	0	0	magic parents
Po-0	2B	30-Nov	3	No	53	55	67	107	40	111	1	2	3	12_30-Nov_2B_55	2.803738318	4.47761194	magic parents
Po-0	2B	30-Nov	3	No	53	55	67	107	40	111	1	3	48	12_30-Nov_2B_55	44.85981308	71.64179104	magic parents
Po-0	2B	30-Nov	3	No	53	55	67	107	40	111	1	4	14	12_30-Nov_2B_55	13.08411215	20.89552239	magic parents
Po-0	2B	30-Nov	3	No	53	55	67	107	40	111	1	5	2	12_30-Nov_2B_55	1.869158879	2.985074627	magic parents
Po-0	2B	30-Nov	3	No	53	55	67	107	40	111	1	6	0	12_30-Nov_2B_55	0	0	magic parents
Po-0	2B	30-Nov	3	No	53	55	67	107	40	111	1	7	0	12_30-Nov_2B_55	0	0	magic parents
Po-0	2B	30-Nov	3	No	53	55	67	107	40	111	1	8	0	12_30-Nov_2B_55	0	0	magic parents
Po-0	2B	30-Nov	3	No	53	55	67	107	40	111	1	9	0	12_30-Nov_2B_55	0	0	magic parents
Po-0	3A	3-Nov	1	No	26	28	100	130	30	106	2	1	0	12_3-Nov_3A_28	0	0	magic parents
Po-0	3A	3-Nov	1	No	26	28	100	130	30	106	2	2	39	12_3-Nov_3A_28	30	39	magic parents
Po-0	3A	3-Nov	1	No	26	28	100	130	30	106	2	3	39	12_3-Nov_3A_28	30	39	magic parents
Po-0	3A	3-Nov	1	No	26	28	100	130	30	106	2	4	12	12_3-Nov_3A_28	9.230769231	12	magic parents
Po-0	3A	3-Nov	1	No	26	28	100	130	30	106	2	5	9	12_3-Nov_3A_28	6.923076923	9	magic parents
Po-0	3A	3-Nov	1	No	26	28	100	130	30	106	2	6	1	12_3-Nov_3A_28	0.769230769	1	magic parents
Po-0	3A	3-Nov	1	No	26	28	100	130	30	106	2	7	0	12_3-Nov_3A_28	0	0	magic parents
Po-0	3A	3-Nov	1	No	26	28	100	130	30	106	2	8	0	12_3-Nov_3A_28	0	0	magic parents
Po-0	3A	3-Nov	1	No	26	28	100	130	30	106	2	9	0	12_3-Nov_3A_28	0	0	magic parents
Po-0	3A	17-Nov	2	No	40	42	72	108	36	109	2	1	0	12_17-Nov_3A_42	0	0	magic parents
Po-0	3A	17-Nov	2	No	40	42	72	108	36	109	2	2	25	12_17-Nov_3A_42	23.14814815	34.72222222	magic parents
Po-0	3A	17-Nov	2	No	40	42	72	108	36	109	2	3	33	12_17-Nov_3A_42	30.55555556	45.83333333	magic parents
Po-0	3A	17-Nov	2	No	40	42	72	108	36	109	2	4	8	12_17-Nov_3A_42	7.407407407	11.11111111	magic parents
Po-0	3A	17-Nov	2	No	40	42	72	108	36	109	2	5	6	12_17-Nov_3A_42	5.555555556	8.333333333	magic parents
Po-0	3A	17-Nov	2	No	40	42	72	108	36	109	2	6	0	12_17-Nov_3A_42	0	0	magic parents
Po-0	3A	17-Nov	2	No	40	42	72	108	36	109	2	7	0	12_17-Nov_3A_42	0	0	magic parents
Po-0	3A	17-Nov	2	No	40	42	72	108	36	109	2	8	0	12_17-Nov_3A_42	0	0	magic parents
Po-0	3A	17-Nov	2	No	40	42	72	108	36	109	2	9	0	12_17-Nov_3A_42	0	0	magic parents
Po-0	3A	30-Nov	3	No	53	55	75	99	24	112	2	1	0	12_30-Nov_3A_55	0	0	magic parents
Po-0	3A	30-Nov	3	No	53	55	75	99	24	112	2	2	21	12_30-Nov_3A_55	21.21212121	28	magic parents
Po-0	3A	30-Nov	3	No	53	55	75	99	24	112	2	3	44	12_30-Nov_3A_55	44.44444444	58.66666667	magic parents
Po-0	3A	30-Nov	3	No	53	55	75	99	24	112	2	4	6	12_30-Nov_3A_55	6.060606061	8	magic parents
Po-0	3A	30-Nov	3	No	53	55	75	99	24	112	2	5	1	12_30-Nov_3A_55	1.01010101	1.333333333	magic parents
Po-0	3A	30-Nov	3	No	53	55	75	99	24	112	2	6	0	12_30-Nov_3A_55	0	0	magic parents
Po-0	3A	30-Nov	3	No	53	55	75	99	24	112	2	7	0	12_30-Nov_3A_55	0	0	magic parents
Po-0	3A	30-Nov	3	No	53	55	75	99	24	112	2	8	1	12_30-Nov_3A_55	1.01010101	1.333333333	magic parents
Po-0	3A	30-Nov	3	No	53	55	75	99	24	112	2	9	2	12_30-Nov_3A_55	2.02020202	2.666666667	magic parents
Po-0	3B	3-Nov	1	No	32	28	68	121	53	107	3	1	0	12_3-Nov_3B_28	0	0	magic parents
Po-0	3B	3-Nov	1	No	32	28	68	121	53	107	3	2	16	12_3-Nov_3B_28	13.2231405	23.52941176	magic parents
Po-0	3B	3-Nov	1	No	32	28	68	121	53	107	3	3	25	12_3-Nov_3B_28	20.66115702	36.76470588	magic parents
Po-0	3B	3-Nov	1	No	32	28	68	121	53	107	3	4	23	12_3-Nov_3B_28	19.00826446	33.82352941	magic parents
Po-0	3B	3-Nov	1	No	32	28	68	121	53	107	3	5	3	12_3-Nov_3B_28	2.479338843	4.411764706	magic parents
Po-0	3B	3-Nov	1	No	32	28	68	121	53	107	3	6	1	12_3-Nov_3B_28	0.826446281	1.470588235	magic parents
Po-0	3B	3-Nov	1	No	32	28	68	121	53	107	3	7	0	12_3-Nov_3B_28	0	0	magic parents
Po-0	3B	3-Nov	1	No	32	28	68	121	53	107	3	8	0	12_3-Nov_3B_28	0	0	magic parents
Po-0	3B	3-Nov	1	No	32	28	68	121	53	107	3	9	0	12_3-Nov_3B_28	0	0	magic parents
Po-0	3B	17-Nov	2	No	45	42	43	115	72	110	3	1	0	12_17-Nov_3B_42	0	0	magic parents
Po-0	3B	17-Nov	2	No	45	42	43	115	72	110	3	2	2	12_17-Nov_3B_42	1.739130435	4.651162791	magic parents
Po-0	3B	17-Nov	2	No	45	42	43	115	72	110	3	3	31	12_17-Nov_3B_42	26.95652174	72.09302326	magic parents
Po-0	3B	17-Nov	2	No	45	42	43	115	72	110	3	4	10	12_17-Nov_3B_42	8.695652174	23.25581395	magic parents
Po-0	3B	17-Nov	2	No	45	42	43	115	72	110	3	5	0	12_17-Nov_3B_42	0	0	magic parents
Po-0	3B	17-Nov	2	No	45	42	43	115	72	110	3	6	0	12_17-Nov_3B_42	0	0	magic parents
Po-0	3B	17-Nov	2	No	45	42	43	115	72	110	3	7	0	12_17-Nov_3B_42	0	0	magic parents
Po-0	3B	17-Nov	2	No	45	42	43	115	72	110	3	8	0	12_17-Nov_3B_42	0	0	magic parents
Po-0	3B	17-Nov	2	No	45	42	43	115	72	110	3	9	0	12_17-Nov_3B_42	0	0	magic parents
Po-0	3B	30-Nov	3	No	58	55	78	151	73	113	3	1	0	12_30-Nov_3B_55	0	0	magic parents
Po-0	3B	30-Nov	3	No	58	55	78	151	73	113	3	2	4	12_30-Nov_3B_55	2.649006623	5.128205128	magic parents
Po-0	3B	30-Nov	3	No	58	55	78	151	73	113	3	3	51	12_30-Nov_3B_55	33.77483444	65.38461538	magic parents
Po-0	3B	30-Nov	3	No	58	55	78	151	73	113	3	4	20	12_30-Nov_3B_55	13.24503311	25.64102564	magic parents
Po-0	3B	30-Nov	3	No	58	55	78	151	73	113	3	5	3	12_30-Nov_3B_55	1.986754967	3.846153846	magic parents
Po-0	3B	30-Nov	3	No	58	55	78	151	73	113	3	6	0	12_30-Nov_3B_55	0	0	magic parents
Po-0	3B	30-Nov	3	No	58	55	78	151	73	113	3	7	0	12_30-Nov_3B_55	0	0	magic parents
Po-0	3B	30-Nov	3	No	58	55	78	151	73	113	3	8	0	12_30-Nov_3B_55	0	0	magic parents
Po-0	3B	30-Nov	3	No	58	55	78	151	73	113	3	9	0	12_30-Nov_3B_55	0	0	magic parents
Rsch-4	1B	3-Nov	1	No	31	29	95	110	15	114	1	1	0	13_3-Nov_1B_29	0	0	magic parents
Rsch-4	1B	3-Nov	1	No	31	29	95	110	15	114	1	2	40	13_3-Nov_1B_29	36.36363636	42.10526316	magic parents
Rsch-4	1B	3-Nov	1	No	31	29	95	110	15	114	1	3	46	13_3-Nov_1B_29	41.81818182	48.42105263	magic parents
Rsch-4	1B	3-Nov	1	No	31	29	95	110	15	114	1	4	9	13_3-Nov_1B_29	8.181818182	9.473684211	magic parents
Rsch-4	1B	3-Nov	1	No	31	29	95	110	15	114	1	5	0	13_3-Nov_1B_29	0	0	magic parents
Rsch-4	1B	3-Nov	1	No	31	29	95	110	15	114	1	6	0	13_3-Nov_1B_29	0	0	magic parents
Rsch-4	1B	17-Nov	2	No	46	44	67	114	47	118	1	1	0	13_17-Nov_1B_44	0	0	magic parents
Rsch-4	1B	17-Nov	2	No	46	44	67	114	47	118	1	2	28	13_17-Nov_1B_44	24.56140351	41.79104478	magic parents
Rsch-4	1B	17-Nov	2	No	46	44	67	114	47	118	1	3	38	13_17-Nov_1B_44	33.33333333	56.71641791	magic parents
Rsch-4	1B	17-Nov	2	No	46	44	67	114	47	118	1	4	1	13_17-Nov_1B_44	0.877192982	1.492537313	magic parents
Rsch-4	1B	17-Nov	2	No	46	44	67	114	47	118	1	5	0	13_17-Nov_1B_44	0	0	magic parents
Rsch-4	1B	17-Nov	2	No	46	44	67	114	47	118	1	6	0	13_17-Nov_1B_44	0	0	magic parents
Rsch-4	1B	30-Nov	3	No	59	57	87	99	12	122	1	1	0	13_30-Nov_1B_57	0	0	magic parents
Rsch-4	1B	30-Nov	3	No	59	57	87	99	12	122	1	2	16	13_30-Nov_1B_57	16.16161616	18.3908046	magic parents
Rsch-4	1B	30-Nov	3	No	59	57	87	99	12	122	1	3	71	13_30-Nov_1B_57	71.71717172	81.6091954	magic parents
Rsch-4	1B	30-Nov	3	No	59	57	87	99	12	122	1	4	0	13_30-Nov_1B_57	0	0	magic parents
Rsch-4	1B	30-Nov	3	No	59	57	87	99	12	122	1	5	0	13_30-Nov_1B_57	0	0	magic parents
Rsch-4	1B	30-Nov	3	No	59	57	87	99	12	122	1	6	0	13_30-Nov_1B_57	0	0	magic parents
Rsch-4	2B	3-Nov	1	No	28	29	34	113	79	115	2	1	0	13_3-Nov_2B_29	0	0	magic parents
Rsch-4	2B	3-Nov	1	No	28	29	34	113	79	115	2	2	6	13_3-Nov_2B_29	5.309734513	17.64705882	magic parents
Rsch-4	2B	3-Nov	1	No	28	29	34	113	79	115	2	3	16	13_3-Nov_2B_29	14.15929204	47.05882353	magic parents
Rsch-4	2B	3-Nov	1	No	28	29	34	113	79	115	2	4	11	13_3-Nov_2B_29	9.734513274	32.35294118	magic parents
Rsch-4	2B	3-Nov	1	No	28	29	34	113	79	115	2	5	1	13_3-Nov_2B_29	0.884955752	2.941176471	magic parents
Rsch-4	2B	3-Nov	1	No	28	29	34	113	79	115	2	6	0	13_3-Nov_2B_29	0	0	magic parents
Rsch-4	2B	17-Nov	2	No	43	44	12	117	105	119	2	1	0	13_17-Nov_2B_44	0	0	magic parents
Rsch-4	2B	17-Nov	2	No	43	44	12	117	105	119	2	2	3	13_17-Nov_2B_44	2.564102564	25	magic parents
Rsch-4	2B	17-Nov	2	No	43	44	12	117	105	119	2	3	9	13_17-Nov_2B_44	7.692307692	75	magic parents
Rsch-4	2B	17-Nov	2	No	43	44	12	117	105	119	2	4	0	13_17-Nov_2B_44	0	0	magic parents
Rsch-4	2B	17-Nov	2	No	43	44	12	117	105	119	2	5	0	13_17-Nov_2B_44	0	0	magic parents
Rsch-4	2B	17-Nov	2	No	43	44	12	117	105	119	2	6	0	13_17-Nov_2B_44	0	0	magic parents
Rsch-4	2B	30-Nov	3	No	56	57	14	106	92	123	2	1	0	13_30-Nov_2B_57	0	0	magic parents
Rsch-4	2B	30-Nov	3	No	56	57	14	106	92	123	2	2	1	13_30-Nov_2B_57	0.943396226	7.142857143	magic parents
Rsch-4	2B	30-Nov	3	No	56	57	14	106	92	123	2	3	11	13_30-Nov_2B_57	10.37735849	78.57142857	magic parents
Rsch-4	2B	30-Nov	3	No	56	57	14	106	92	123	2	4	2	13_30-Nov_2B_57	1.886792453	14.28571429	magic parents
Rsch-4	2B	30-Nov	3	No	56	57	14	106	92	123	2	5	0	13_30-Nov_2B_57	0	0	magic parents
Rsch-4	2B	30-Nov	3	No	56	57	14	106	92	123	2	6	0	13_30-Nov_2B_57	0	0	magic parents
Rsch-4	3A	3-Nov	1	No	28	29	51	104	53	116	3	1	0	13_3-Nov_3A_29	0	0	magic parents
Rsch-4	3A	3-Nov	1	No	28	29	51	104	53	116	3	2	10	13_3-Nov_3A_29	9.615384615	19.60784314	magic parents
Rsch-4	3A	3-Nov	1	No	28	29	51	104	53	116	3	3	24	13_3-Nov_3A_29	23.07692308	47.05882353	magic parents
Rsch-4	3A	3-Nov	1	No	28	29	51	104	53	116	3	4	17	13_3-Nov_3A_29	16.34615385	33.33333333	magic parents
Rsch-4	3A	3-Nov	1	No	28	29	51	104	53	116	3	5	0	13_3-Nov_3A_29	0	0	magic parents
Rsch-4	3A	3-Nov	1	No	28	29	51	104	53	116	3	6	0	13_3-Nov_3A_29	0	0	magic parents
Rsch-4	3A	17-Nov	2	No	43	44	33	107	74	120	3	1	0	13_17-Nov_3A_44	0	0	magic parents
Rsch-4	3A	17-Nov	2	No	43	44	33	107	74	120	3	2	5	13_17-Nov_3A_44	4.672897196	15.15151515	magic parents
Rsch-4	3A	17-Nov	2	No	43	44	33	107	74	120	3	3	26	13_17-Nov_3A_44	24.29906542	78.78787879	magic parents
Rsch-4	3A	17-Nov	2	No	43	44	33	107	74	120	3	4	2	13_17-Nov_3A_44	1.869158879	6.060606061	magic parents
Rsch-4	3A	17-Nov	2	No	43	44	33	107	74	120	3	5	0	13_17-Nov_3A_44	0	0	magic parents
Rsch-4	3A	17-Nov	2	No	43	44	33	107	74	120	3	6	0	13_17-Nov_3A_44	0	0	magic parents
Rsch-4	3B	3-Nov	1	No	28	29	65	118	53	117	4	1	0	13_3-Nov_3B_29	0	0	magic parents
Rsch-4	3B	3-Nov	1	No	28	29	65	118	53	117	4	2	19	13_3-Nov_3B_29	16.10169492	29.23076923	magic parents
Rsch-4	3B	3-Nov	1	No	28	29	65	118	53	117	4	3	37	13_3-Nov_3B_29	31.3559322	56.92307692	magic parents
Rsch-4	3B	3-Nov	1	No	28	29	65	118	53	117	4	4	8	13_3-Nov_3B_29	6.779661017	12.30769231	magic parents
Rsch-4	3B	3-Nov	1	No	28	29	65	118	53	117	4	5	0	13_3-Nov_3B_29	0	0	magic parents
Rsch-4	3B	3-Nov	1	No	28	29	65	118	53	117	4	6	1	13_3-Nov_3B_29	0.847457627	1.538461538	magic parents
Rsch-4	3B	17-Nov	2	No	43	44	33	109	76	121	4	1	0	13_17-Nov_3B_44	0	0	magic parents
Rsch-4	3B	17-Nov	2	No	43	44	33	109	76	121	4	2	12	13_17-Nov_3B_44	11.00917431	36.36363636	magic parents
Rsch-4	3B	17-Nov	2	No	43	44	33	109	76	121	4	3	21	13_17-Nov_3B_44	19.26605505	63.63636364	magic parents
Rsch-4	3B	17-Nov	2	No	43	44	33	109	76	121	4	4	0	13_17-Nov_3B_44	0	0	magic parents
Rsch-4	3B	17-Nov	2	No	43	44	33	109	76	121	4	5	0	13_17-Nov_3B_44	0	0	magic parents
Rsch-4	3B	17-Nov	2	No	43	44	33	109	76	121	4	6	0	13_17-Nov_3B_44	0	0	magic parents
Rsch-4	3B	30-Nov	3	No	56	57	42	94	52	124	3	1	0	13_30-Nov_3B_57	0	0	magic parents
Rsch-4	3B	30-Nov	3	No	56	57	42	94	52	124	3	2	1	13_30-Nov_3B_57	1.063829787	2.380952381	magic parents
Rsch-4	3B	30-Nov	3	No	56	57	42	94	52	124	3	3	36	13_30-Nov_3B_57	38.29787234	85.71428571	magic parents
Rsch-4	3B	30-Nov	3	No	56	57	42	94	52	124	3	4	5	13_30-Nov_3B_57	5.319148936	11.9047619	magic parents
Rsch-4	3B	30-Nov	3	No	56	57	42	94	52	124	3	5	0	13_30-Nov_3B_57	0	0	magic parents
Rsch-4	3B	30-Nov	3	No	56	57	42	94	52	124	3	6	0	13_30-Nov_3B_57	0	0	magic parents
Sf-2	1	10/5/2016	1b	Yes	29	29	51	137	86	158	1	1	0	14_10/5/2016_1_29	0	0	magic parents
Sf-2	1	10/5/2016	1b	Yes	29	29	51	137	86	158	1	2	0	14_10/5/2016_1_29	0	0	magic parents
Sf-2	1	10/5/2016	1b	Yes	29	29	51	137	86	158	1	3	20	14_10/5/2016_1_29	14.59854015	39.21568627	magic parents
Sf-2	1	10/5/2016	1b	Yes	29	29	51	137	86	158	1	4	14	14_10/5/2016_1_29	10.2189781	27.45098039	magic parents
Sf-2	1	10/5/2016	1b	Yes	29	29	51	137	86	158	1	5	9	14_10/5/2016_1_29	6.569343066	17.64705882	magic parents
Sf-2	1	10/5/2016	1b	Yes	29	29	51	137	86	158	1	6	5	14_10/5/2016_1_29	3.649635036	9.803921569	magic parents
Sf-2	1	10/5/2016	1b	Yes	29	29	51	137	86	158	1	7	2	14_10/5/2016_1_29	1.459854015	3.921568627	magic parents
Sf-2	1	10/5/2016	1b	Yes	29	29	51	137	86	158	1	8	0	14_10/5/2016_1_29	0	0	magic parents
Sf-2	1	10/5/2016	1b	Yes	29	29	51	137	86	158	1	9	1	14_10/5/2016_1_29	0.729927007	1.960784314	magic parents
Sf-2	2	10/5/2016	1b	Yes	29	29	112	145	33	159	2	1	0	14_10/5/2016_2_29	0	0	magic parents
Sf-2	2	10/5/2016	1b	Yes	29	29	112	145	33	159	2	2	5	14_10/5/2016_2_29	3.448275862	4.464285714	magic parents
Sf-2	2	10/5/2016	1b	Yes	29	29	112	145	33	159	2	3	43	14_10/5/2016_2_29	29.65517241	38.39285714	magic parents
Sf-2	2	10/5/2016	1b	Yes	29	29	112	145	33	159	2	4	37	14_10/5/2016_2_29	25.51724138	33.03571429	magic parents
Sf-2	2	10/5/2016	1b	Yes	29	29	112	145	33	159	2	5	20	14_10/5/2016_2_29	13.79310345	17.85714286	magic parents
Sf-2	2	10/5/2016	1b	Yes	29	29	112	145	33	159	2	6	6	14_10/5/2016_2_29	4.137931034	5.357142857	magic parents
Sf-2	2	10/5/2016	1b	Yes	29	29	112	145	33	159	2	7	1	14_10/5/2016_2_29	0.689655172	0.892857143	magic parents
Sf-2	2	10/5/2016	1b	Yes	29	29	112	145	33	159	2	8	0	14_10/5/2016_2_29	0	0	magic parents
Sf-2	2	10/5/2016	1b	Yes	29	29	112	145	33	159	2	9	0	14_10/5/2016_2_29	0	0	magic parents
Sf-2	3	10/5/2016	1b	Yes	29	29	50	144	94	160	3	1	0	14_10/5/2016_3_29	0	0	magic parents
Sf-2	3	10/5/2016	1b	Yes	29	29	50	144	94	160	3	2	1	14_10/5/2016_3_29	0.694444444	2	magic parents
Sf-2	3	10/5/2016	1b	Yes	29	29	50	144	94	160	3	3	19	14_10/5/2016_3_29	13.19444444	38	magic parents
Sf-2	3	10/5/2016	1b	Yes	29	29	50	144	94	160	3	4	15	14_10/5/2016_3_29	10.41666667	30	magic parents
Sf-2	3	10/5/2016	1b	Yes	29	29	50	144	94	160	3	5	6	14_10/5/2016_3_29	4.166666667	12	magic parents
Sf-2	3	10/5/2016	1b	Yes	29	29	50	144	94	160	3	6	4	14_10/5/2016_3_29	2.777777778	8	magic parents
Sf-2	3	10/5/2016	1b	Yes	29	29	50	144	94	160	3	7	0	14_10/5/2016_3_29	0	0	magic parents
Sf-2	3	10/5/2016	1b	Yes	29	29	50	144	94	160	3	8	3	14_10/5/2016_3_29	2.083333333	6	magic parents
Sf-2	3	10/5/2016	1b	Yes	29	29	50	144	94	160	3	9	2	14_10/5/2016_3_29	1.388888889	4	magic parents
Tsu-0	1A	3-Nov	1	No	26	28	97	112	15	125	1	1	0	15_3-Nov_1A_28	0	0	magic parents
Tsu-0	1A	3-Nov	1	No	26	28	97	112	15	125	1	2	8	15_3-Nov_1A_28	7.142857143	8.24742268	magic parents
Tsu-0	1A	3-Nov	1	No	26	28	97	112	15	125	1	3	54	15_3-Nov_1A_28	48.21428571	55.67010309	magic parents
Tsu-0	1A	3-Nov	1	No	26	28	97	112	15	125	1	4	27	15_3-Nov_1A_28	24.10714286	27.83505155	magic parents
Tsu-0	1A	3-Nov	1	No	26	28	97	112	15	125	1	5	6	15_3-Nov_1A_28	5.357142857	6.18556701	magic parents
Tsu-0	1A	3-Nov	1	No	26	28	97	112	15	125	1	6	2	15_3-Nov_1A_28	1.785714286	2.06185567	magic parents
Tsu-0	1A	17-Nov	2	No	40	42	113	123	10	129	1	1	0	15_17-Nov_1A_42	0	0	magic parents
Tsu-0	1A	17-Nov	2	No	40	42	113	123	10	129	1	2	27	15_17-Nov_1A_42	21.95121951	23.89380531	magic parents
Tsu-0	1A	17-Nov	2	No	40	42	113	123	10	129	1	3	71	15_17-Nov_1A_42	57.72357724	62.83185841	magic parents
Tsu-0	1A	17-Nov	2	No	40	42	113	123	10	129	1	4	11	15_17-Nov_1A_42	8.943089431	9.734513274	magic parents
Tsu-0	1A	17-Nov	2	No	40	42	113	123	10	129	1	5	3	15_17-Nov_1A_42	2.43902439	2.654867257	magic parents
Tsu-0	1A	17-Nov	2	No	40	42	113	123	10	129	1	6	1	15_17-Nov_1A_42	0.81300813	0.884955752	magic parents
Tsu-0	1A	30-Nov	3	No	53	55	99	112	13	132	1	1	0	15_30-Nov_1A_55	0	0	magic parents
Tsu-0	1A	30-Nov	3	No	53	55	99	112	13	132	1	2	10	15_30-Nov_1A_55	8.928571429	10.1010101	magic parents
Tsu-0	1A	30-Nov	3	No	53	55	99	112	13	132	1	3	74	15_30-Nov_1A_55	66.07142857	74.74747475	magic parents
Tsu-0	1A	30-Nov	3	No	53	55	99	112	13	132	1	4	13	15_30-Nov_1A_55	11.60714286	13.13131313	magic parents
Tsu-0	1A	30-Nov	3	No	53	55	99	112	13	132	1	5	1	15_30-Nov_1A_55	0.892857143	1.01010101	magic parents
Tsu-0	1A	30-Nov	3	No	53	55	99	112	13	132	1	6	1	15_30-Nov_1A_55	0.892857143	1.01010101	magic parents
Tsu-0	2A	3-Nov	1	No	32	28	71	118	47	126	2	1	0	15_3-Nov_2A_28	0	0	magic parents
Tsu-0	2A	3-Nov	1	No	32	28	71	118	47	126	2	2	4	15_3-Nov_2A_28	3.389830508	5.633802817	magic parents
Tsu-0	2A	3-Nov	1	No	32	28	71	118	47	126	2	3	31	15_3-Nov_2A_28	26.27118644	43.66197183	magic parents
Tsu-0	2A	3-Nov	1	No	32	28	71	118	47	126	2	4	26	15_3-Nov_2A_28	22.03389831	36.61971831	magic parents
Tsu-0	2A	3-Nov	1	No	32	28	71	118	47	126	2	5	6	15_3-Nov_2A_28	5.084745763	8.450704225	magic parents
Tsu-0	2A	3-Nov	1	No	32	28	71	118	47	126	2	6	4	15_3-Nov_2A_28	3.389830508	5.633802817	magic parents
Tsu-0	2A	17-Nov	2	No	46	42	67	108	41	130	2	1	0	15_17-Nov_2A_42	0	0	magic parents
Tsu-0	2A	17-Nov	2	No	46	42	67	108	41	130	2	2	5	15_17-Nov_2A_42	4.62962963	7.462686567	magic parents
Tsu-0	2A	17-Nov	2	No	46	42	67	108	41	130	2	3	43	15_17-Nov_2A_42	39.81481481	64.17910448	magic parents
Tsu-0	2A	17-Nov	2	No	46	42	67	108	41	130	2	4	15	15_17-Nov_2A_42	13.88888889	22.3880597	magic parents
Tsu-0	2A	17-Nov	2	No	46	42	67	108	41	130	2	5	3	15_17-Nov_2A_42	2.777777778	4.47761194	magic parents
Tsu-0	2A	17-Nov	2	No	46	42	67	108	41	130	2	6	1	15_17-Nov_2A_42	0.925925926	1.492537313	magic parents
Tsu-0	2A	30-Nov	3	No	59	55	61	109	48	133	2	1	0	15_30-Nov_2A_55	0	0	magic parents
Tsu-0	2A	30-Nov	3	No	59	55	61	109	48	133	2	2	1	15_30-Nov_2A_55	0.917431193	1.639344262	magic parents
Tsu-0	2A	30-Nov	3	No	59	55	61	109	48	133	2	3	38	15_30-Nov_2A_55	34.86238532	62.29508197	magic parents
Tsu-0	2A	30-Nov	3	No	59	55	61	109	48	133	2	4	19	15_30-Nov_2A_55	17.43119266	31.14754098	magic parents
Tsu-0	2A	30-Nov	3	No	59	55	61	109	48	133	2	5	3	15_30-Nov_2A_55	2.752293578	4.918032787	magic parents
Tsu-0	2A	30-Nov	3	No	59	55	61	109	48	133	2	6	0	15_30-Nov_2A_55	0	0	magic parents
Tsu-0	2B	3-Nov	1	No	26	28	65	113	48	127	3	1	0	15_3-Nov_2B_28	0	0	magic parents
Tsu-0	2B	3-Nov	1	No	26	28	65	113	48	127	3	2	7	15_3-Nov_2B_28	6.194690265	10.76923077	magic parents
Tsu-0	2B	3-Nov	1	No	26	28	65	113	48	127	3	3	26	15_3-Nov_2B_28	23.00884956	40	magic parents
Tsu-0	2B	3-Nov	1	No	26	28	65	113	48	127	3	4	25	15_3-Nov_2B_28	22.12389381	38.46153846	magic parents
Tsu-0	2B	3-Nov	1	No	26	28	65	113	48	127	3	5	5	15_3-Nov_2B_28	4.424778761	7.692307692	magic parents
Tsu-0	2B	3-Nov	1	No	26	28	65	113	48	127	3	6	2	15_3-Nov_2B_28	1.769911504	3.076923077	magic parents
Tsu-0	2B	17-Nov	2	No	40	42	69	109	40	131	3	1	0	15_17-Nov_2B_42	0	0	magic parents
Tsu-0	2B	17-Nov	2	No	40	42	69	109	40	131	3	2	12	15_17-Nov_2B_42	11.00917431	17.39130435	magic parents
Tsu-0	2B	17-Nov	2	No	40	42	69	109	40	131	3	3	45	15_17-Nov_2B_42	41.28440367	65.2173913	magic parents
Tsu-0	2B	17-Nov	2	No	40	42	69	109	40	131	3	4	12	15_17-Nov_2B_42	11.00917431	17.39130435	magic parents
Tsu-0	2B	17-Nov	2	No	40	42	69	109	40	131	3	5	0	15_17-Nov_2B_42	0	0	magic parents
Tsu-0	2B	17-Nov	2	No	40	42	69	109	40	131	3	6	0	15_17-Nov_2B_42	0	0	magic parents
Tsu-0	2B	30-Nov	3	No	53	55	58	101	43	134	3	1	0	15_30-Nov_2B_55	0	0	magic parents
Tsu-0	2B	30-Nov	3	No	53	55	58	101	43	134	3	2	3	15_30-Nov_2B_55	2.97029703	5.172413793	magic parents
Tsu-0	2B	30-Nov	3	No	53	55	58	101	43	134	3	3	42	15_30-Nov_2B_55	41.58415842	72.4137931	magic parents
Tsu-0	2B	30-Nov	3	No	53	55	58	101	43	134	3	4	13	15_30-Nov_2B_55	12.87128713	22.4137931	magic parents
Tsu-0	2B	30-Nov	3	No	53	55	58	101	43	134	3	5	0	15_30-Nov_2B_55	0	0	magic parents
Tsu-0	2B	30-Nov	3	No	53	55	58	101	43	134	3	6	0	15_30-Nov_2B_55	0	0	magic parents
Tsu-0	3B	3-Nov	1	No	29	28	80	110	30	128	4	1	0	15_3-Nov_3B_28	0	0	magic parents
Tsu-0	3B	3-Nov	1	No	29	28	80	110	30	128	4	2	8	15_3-Nov_3B_28	7.272727273	10	magic parents
Tsu-0	3B	3-Nov	1	No	29	28	80	110	30	128	4	3	41	15_3-Nov_3B_28	37.27272727	51.25	magic parents
Tsu-0	3B	3-Nov	1	No	29	28	80	110	30	128	4	4	28	15_3-Nov_3B_28	25.45454545	35	magic parents
Tsu-0	3B	3-Nov	1	No	29	28	80	110	30	128	4	5	2	15_3-Nov_3B_28	1.818181818	2.5	magic parents
Tsu-0	3B	3-Nov	1	No	29	28	80	110	30	128	4	6	1	15_3-Nov_3B_28	0.909090909	1.25	magic parents
Wil-2	A	11-Dec	1	No	28	28	23	110	87	135	1	1	0	16_11-Dec_A_28	0	0	magic parents
Wil-2	A	11-Dec	1	No	28	28	23	110	87	135	1	2	0	16_11-Dec_A_28	0	0	magic parents
Wil-2	A	11-Dec	1	No	28	28	23	110	87	135	1	3	10	16_11-Dec_A_28	9.090909091	43.47826087	magic parents
Wil-2	A	11-Dec	1	No	28	28	23	110	87	135	1	4	10	16_11-Dec_A_28	9.090909091	43.47826087	magic parents
Wil-2	A	11-Dec	1	No	28	28	23	110	87	135	1	5	3	16_11-Dec_A_28	2.727272727	13.04347826	magic parents
Wil-2	A	11-Dec	1	No	28	28	23	110	87	135	1	6	0	16_11-Dec_A_28	0	0	magic parents
Wil-2	A	11-Dec	1	No	28	28	23	110	87	135	1	7	0	16_11-Dec_A_28	0	0	magic parents
Wil-2	A	11-Dec	1	No	28	28	23	110	87	135	1	8	0	16_11-Dec_A_28	0	0	magic parents
Wil-2	A	11-Dec	1	No	28	28	23	110	87	135	1	9	0	16_11-Dec_A_28	0	0	magic parents
Wil-2	A	4-Jan	2	No	52	52	45	105	60	139	1	1	0	16_4-Jan_A_52	0	0	magic parents
Wil-2	A	4-Jan	2	No	52	52	45	105	60	139	1	2	0	16_4-Jan_A_52	0	0	magic parents
Wil-2	A	4-Jan	2	No	52	52	45	105	60	139	1	3	28	16_4-Jan_A_52	26.66666667	62.22222222	magic parents
Wil-2	A	4-Jan	2	No	52	52	45	105	60	139	1	4	15	16_4-Jan_A_52	14.28571429	33.33333333	magic parents
Wil-2	A	4-Jan	2	No	52	52	45	105	60	139	1	5	2	16_4-Jan_A_52	1.904761905	4.444444444	magic parents
Wil-2	A	4-Jan	2	No	52	52	45	105	60	139	1	6	0	16_4-Jan_A_52	0	0	magic parents
Wil-2	A	4-Jan	2	No	52	52	45	105	60	139	1	7	0	16_4-Jan_A_52	0	0	magic parents
Wil-2	A	4-Jan	2	No	52	52	45	105	60	139	1	8	0	16_4-Jan_A_52	0	0	magic parents
Wil-2	A	4-Jan	2	No	52	52	45	105	60	139	1	9	0	16_4-Jan_A_52	0	0	magic parents
Wil-2	B	11-Dec	1	No	28	28	23	109	86	136	2	1	0	16_11-Dec_B_28	0	0	magic parents
Wil-2	B	11-Dec	1	No	28	28	23	109	86	136	2	2	0	16_11-Dec_B_28	0	0	magic parents
Wil-2	B	11-Dec	1	No	28	28	23	109	86	136	2	3	10	16_11-Dec_B_28	9.174311927	43.47826087	magic parents
Wil-2	B	11-Dec	1	No	28	28	23	109	86	136	2	4	12	16_11-Dec_B_28	11.00917431	52.17391304	magic parents
Wil-2	B	11-Dec	1	No	28	28	23	109	86	136	2	5	1	16_11-Dec_B_28	0.917431193	4.347826087	magic parents
Wil-2	B	11-Dec	1	No	28	28	23	109	86	136	2	6	0	16_11-Dec_B_28	0	0	magic parents
Wil-2	B	11-Dec	1	No	28	28	23	109	86	136	2	7	0	16_11-Dec_B_28	0	0	magic parents
Wil-2	B	11-Dec	1	No	28	28	23	109	86	136	2	8	0	16_11-Dec_B_28	0	0	magic parents
Wil-2	B	11-Dec	1	No	28	28	23	109	86	136	2	9	0	16_11-Dec_B_28	0	0	magic parents
Wil-2	B	4-Jan	2	No	52	52	52	107	55	140	2	1	0	16_4-Jan_B_52	0	0	magic parents
Wil-2	B	4-Jan	2	No	52	52	52	107	55	140	2	2	0	16_4-Jan_B_52	0	0	magic parents
Wil-2	B	4-Jan	2	No	52	52	52	107	55	140	2	3	32	16_4-Jan_B_52	29.90654206	61.53846154	magic parents
Wil-2	B	4-Jan	2	No	52	52	52	107	55	140	2	4	19	16_4-Jan_B_52	17.75700935	36.53846154	magic parents
Wil-2	B	4-Jan	2	No	52	52	52	107	55	140	2	5	1	16_4-Jan_B_52	0.934579439	1.923076923	magic parents
Wil-2	B	4-Jan	2	No	52	52	52	107	55	140	2	6	0	16_4-Jan_B_52	0	0	magic parents
Wil-2	B	4-Jan	2	No	52	52	52	107	55	140	2	7	0	16_4-Jan_B_52	0	0	magic parents
Wil-2	B	4-Jan	2	No	52	52	52	107	55	140	2	8	0	16_4-Jan_B_52	0	0	magic parents
Wil-2	B	4-Jan	2	No	52	52	52	107	55	140	2	9	0	16_4-Jan_B_52	0	0	magic parents
Wil-2	C	11-Dec	1	No	28	28	36	113	77	137	3	1	0	16_11-Dec_C_28	0	0	magic parents
Wil-2	C	11-Dec	1	No	28	28	36	113	77	137	3	2	1	16_11-Dec_C_28	0.884955752	2.777777778	magic parents
Wil-2	C	11-Dec	1	No	28	28	36	113	77	137	3	3	19	16_11-Dec_C_28	16.81415929	52.77777778	magic parents
Wil-2	C	11-Dec	1	No	28	28	36	113	77	137	3	4	13	16_11-Dec_C_28	11.50442478	36.11111111	magic parents
Wil-2	C	11-Dec	1	No	28	28	36	113	77	137	3	5	2	16_11-Dec_C_28	1.769911504	5.555555556	magic parents
Wil-2	C	11-Dec	1	No	28	28	36	113	77	137	3	6	1	16_11-Dec_C_28	0.884955752	2.777777778	magic parents
Wil-2	C	11-Dec	1	No	28	28	36	113	77	137	3	7	0	16_11-Dec_C_28	0	0	magic parents
Wil-2	C	11-Dec	1	No	28	28	36	113	77	137	3	8	0	16_11-Dec_C_28	0	0	magic parents
Wil-2	C	11-Dec	1	No	28	28	36	113	77	137	3	9	0	16_11-Dec_C_28	0	0	magic parents
Wil-2	C	4-Jan	2	No	52	52	59	114	55	141	3	1	0	16_4-Jan_C_52	0	0	magic parents
Wil-2	C	4-Jan	2	No	52	52	59	114	55	141	3	2	8	16_4-Jan_C_52	7.01754386	13.55932203	magic parents
Wil-2	C	4-Jan	2	No	52	52	59	114	55	141	3	3	30	16_4-Jan_C_52	26.31578947	50.84745763	magic parents
Wil-2	C	4-Jan	2	No	52	52	59	114	55	141	3	4	18	16_4-Jan_C_52	15.78947368	30.50847458	magic parents
Wil-2	C	4-Jan	2	No	52	52	59	114	55	141	3	5	3	16_4-Jan_C_52	2.631578947	5.084745763	magic parents
Wil-2	C	4-Jan	2	No	52	52	59	114	55	141	3	6	0	16_4-Jan_C_52	0	0	magic parents
Wil-2	C	4-Jan	2	No	52	52	59	114	55	141	3	7	0	16_4-Jan_C_52	0	0	magic parents
Wil-2	C	4-Jan	2	No	52	52	59	114	55	141	3	8	0	16_4-Jan_C_52	0	0	magic parents
Wil-2	C	4-Jan	2	No	52	52	59	114	55	141	3	9	0	16_4-Jan_C_52	0	0	magic parents
Wil-2	D	11-Dec	1	No	28	28	58	109	51	138	4	1	0	16_11-Dec_D_28	0	0	magic parents
Wil-2	D	11-Dec	1	No	28	28	58	109	51	138	4	2	1	16_11-Dec_D_28	0.917431193	1.724137931	magic parents
Wil-2	D	11-Dec	1	No	28	28	58	109	51	138	4	3	31	16_11-Dec_D_28	28.44036697	53.44827586	magic parents
Wil-2	D	11-Dec	1	No	28	28	58	109	51	138	4	4	24	16_11-Dec_D_28	22.01834862	41.37931034	magic parents
Wil-2	D	11-Dec	1	No	28	28	58	109	51	138	4	5	2	16_11-Dec_D_28	1.834862385	3.448275862	magic parents
Wil-2	D	11-Dec	1	No	28	28	58	109	51	138	4	6	0	16_11-Dec_D_28	0	0	magic parents
Wil-2	D	11-Dec	1	No	28	28	58	109	51	138	4	7	0	16_11-Dec_D_28	0	0	magic parents
Wil-2	D	11-Dec	1	No	28	28	58	109	51	138	4	8	0	16_11-Dec_D_28	0	0	magic parents
Wil-2	D	11-Dec	1	No	28	28	58	109	51	138	4	9	0	16_11-Dec_D_28	0	0	magic parents
Wil-2	D	4-Jan	2	No	52	52	62	105	43	142	4	1	0	16_4-Jan_D_52	0	0	magic parents
Wil-2	D	4-Jan	2	No	52	52	62	105	43	142	4	2	1	16_4-Jan_D_52	0.952380952	1.612903226	magic parents
Wil-2	D	4-Jan	2	No	52	52	62	105	43	142	4	3	37	16_4-Jan_D_52	35.23809524	59.67741935	magic parents
Wil-2	D	4-Jan	2	No	52	52	62	105	43	142	4	4	21	16_4-Jan_D_52	20	33.87096774	magic parents
Wil-2	D	4-Jan	2	No	52	52	62	105	43	142	4	5	2	16_4-Jan_D_52	1.904761905	3.225806452	magic parents
Wil-2	D	4-Jan	2	No	52	52	62	105	43	142	4	6	0	16_4-Jan_D_52	0	0	magic parents
Wil-2	D	4-Jan	2	No	52	52	62	105	43	142	4	7	0	16_4-Jan_D_52	0	0	magic parents
Wil-2	D	4-Jan	2	No	52	52	62	105	43	142	4	8	0	16_4-Jan_D_52	0	0	magic parents
Wil-2	D	4-Jan	2	No	52	52	62	105	43	142	4	9	1	16_4-Jan_D_52	0.952380952	1.612903226	magic parents
Ws-0	1	10/5/2016	1b	Yes	29	29	147	150	3	161	1	1	0	17_10/5/2016_1_29	0	0	magic parents
Ws-0	1	10/5/2016	1b	Yes	29	29	147	150	3	161	1	2	21	17_10/5/2016_1_29	14	14.28571429	magic parents
Ws-0	1	10/5/2016	1b	Yes	29	29	147	150	3	161	1	3	72	17_10/5/2016_1_29	48	48.97959184	magic parents
Ws-0	1	10/5/2016	1b	Yes	29	29	147	150	3	161	1	4	43	17_10/5/2016_1_29	28.66666667	29.25170068	magic parents
Ws-0	1	10/5/2016	1b	Yes	29	29	147	150	3	161	1	5	6	17_10/5/2016_1_29	4	4.081632653	magic parents
Ws-0	1	10/5/2016	1b	Yes	29	29	147	150	3	161	1	6	4	17_10/5/2016_1_29	2.666666667	2.721088435	magic parents
Ws-0	1	10/5/2016	1b	Yes	29	29	147	150	3	161	1	7	0	17_10/5/2016_1_29	0	0	magic parents
Ws-0	1	10/5/2016	1b	Yes	29	29	147	150	3	161	1	8	0	17_10/5/2016_1_29	0	0	magic parents
Ws-0	1	10/5/2016	1b	Yes	29	29	147	150	3	161	1	9	0	17_10/5/2016_1_29	0	0	magic parents
Ws-0	1	10/5/2016	1b	Yes	29	29	147	150	3	161	1	10	0	17_10/5/2016_1_29	0	0	magic parents
Ws-0	1	10/5/2016	1b	Yes	29	29	147	150	3	161	1	11	1	17_10/5/2016_1_29	0.666666667	0.680272109	magic parents
Ws-0	1	10/5/2016	1b	Yes	29	29	147	150	3	161	1	12	0	17_10/5/2016_1_29	0	0	magic parents
Ws-0	1	10/5/2016	1b	Yes	29	29	147	150	3	161	1	13	0	17_10/5/2016_1_29	0	0	magic parents
Ws-0	1	10/5/2016	1b	Yes	29	29	147	150	3	161	1	14	0	17_10/5/2016_1_29	0	0	magic parents
Ws-0	2	10/5/2016	1b	Yes	29	29	116	141	25	162	2	1	0	17_10/5/2016_2_29	0	0	magic parents
Ws-0	2	10/5/2016	1b	Yes	29	29	116	141	25	162	2	2	13	17_10/5/2016_2_29	9.219858156	11.20689655	magic parents
Ws-0	2	10/5/2016	1b	Yes	29	29	116	141	25	162	2	3	49	17_10/5/2016_2_29	34.75177305	42.24137931	magic parents
Ws-0	2	10/5/2016	1b	Yes	29	29	116	141	25	162	2	4	36	17_10/5/2016_2_29	25.53191489	31.03448276	magic parents
Ws-0	2	10/5/2016	1b	Yes	29	29	116	141	25	162	2	5	12	17_10/5/2016_2_29	8.510638298	10.34482759	magic parents
Ws-0	2	10/5/2016	1b	Yes	29	29	116	141	25	162	2	6	3	17_10/5/2016_2_29	2.127659574	2.586206897	magic parents
Ws-0	2	10/5/2016	1b	Yes	29	29	116	141	25	162	2	7	0	17_10/5/2016_2_29	0	0	magic parents
Ws-0	2	10/5/2016	1b	Yes	29	29	116	141	25	162	2	8	0	17_10/5/2016_2_29	0	0	magic parents
Ws-0	2	10/5/2016	1b	Yes	29	29	116	141	25	162	2	9	2	17_10/5/2016_2_29	1.418439716	1.724137931	magic parents
Ws-0	2	10/5/2016	1b	Yes	29	29	116	141	25	162	2	10	0	17_10/5/2016_2_29	0	0	magic parents
Ws-0	2	10/5/2016	1b	Yes	29	29	116	141	25	162	2	11	1	17_10/5/2016_2_29	0.709219858	0.862068966	magic parents
Ws-0	2	10/5/2016	1b	Yes	29	29	116	141	25	162	2	12	0	17_10/5/2016_2_29	0	0	magic parents
Ws-0	2	10/5/2016	1b	Yes	29	29	116	141	25	162	2	13	0	17_10/5/2016_2_29	0	0	magic parents
Ws-0	2	10/5/2016	1b	Yes	29	29	116	141	25	162	2	14	0	17_10/5/2016_2_29	0	0	magic parents
Ws-0	3	10/5/2016	1b	Yes	29	29	91	133	42	163	3	1	0	17_10/5/2016_3_29	0	0	magic parents
Ws-0	3	10/5/2016	1b	Yes	29	29	91	133	42	163	3	2	0	17_10/5/2016_3_29	0	0	magic parents
Ws-0	3	10/5/2016	1b	Yes	29	29	91	133	42	163	3	3	4	17_10/5/2016_3_29	3.007518797	4.395604396	magic parents
Ws-0	3	10/5/2016	1b	Yes	29	29	91	133	42	163	3	4	36	17_10/5/2016_3_29	27.06766917	39.56043956	magic parents
Ws-0	3	10/5/2016	1b	Yes	29	29	91	133	42	163	3	5	23	17_10/5/2016_3_29	17.29323308	25.27472527	magic parents
Ws-0	3	10/5/2016	1b	Yes	29	29	91	133	42	163	3	6	9	17_10/5/2016_3_29	6.766917293	9.89010989	magic parents
Ws-0	3	10/5/2016	1b	Yes	29	29	91	133	42	163	3	7	4	17_10/5/2016_3_29	3.007518797	4.395604396	magic parents
Ws-0	3	10/5/2016	1b	Yes	29	29	91	133	42	163	3	8	3	17_10/5/2016_3_29	2.255639098	3.296703297	magic parents
Ws-0	3	10/5/2016	1b	Yes	29	29	91	133	42	163	3	9	4	17_10/5/2016_3_29	3.007518797	4.395604396	magic parents
Ws-0	3	10/5/2016	1b	Yes	29	29	91	133	42	163	3	10	5	17_10/5/2016_3_29	3.759398496	5.494505495	magic parents
Ws-0	3	10/5/2016	1b	Yes	29	29	91	133	42	163	3	11	2	17_10/5/2016_3_29	1.503759398	2.197802198	magic parents
Ws-0	3	10/5/2016	1b	Yes	29	29	91	133	42	163	3	12	0	17_10/5/2016_3_29	0	0	magic parents
Ws-0	3	10/5/2016	1b	Yes	29	29	91	133	42	163	3	13	0	17_10/5/2016_3_29	0	0	magic parents
Ws-0	3	10/5/2016	1b	Yes	29	29	91	133	42	163	3	14	1	17_10/5/2016_3_29	0.751879699	1.098901099	magic parents
Wu-0	1A	26-Oct	1	No	28	28	53	116	63	143	1	1	0	18_26-Oct_1A_28	0	0	magic parents
Wu-0	1A	26-Oct	1	No	28	28	53	116	63	143	1	2	0	18_26-Oct_1A_28	0	0	magic parents
Wu-0	1A	26-Oct	1	No	28	28	53	116	63	143	1	3	21	18_26-Oct_1A_28	18.10344828	39.62264151	magic parents
Wu-0	1A	26-Oct	1	No	28	28	53	116	63	143	1	4	18	18_26-Oct_1A_28	15.51724138	33.96226415	magic parents
Wu-0	1A	26-Oct	1	No	28	28	53	116	63	143	1	5	8	18_26-Oct_1A_28	6.896551724	15.09433962	magic parents
Wu-0	1A	26-Oct	1	No	28	28	53	116	63	143	1	6	5	18_26-Oct_1A_28	4.310344828	9.433962264	magic parents
Wu-0	1A	26-Oct	1	No	28	28	53	116	63	143	1	7	1	18_26-Oct_1A_28	0.862068966	1.886792453	magic parents
Wu-0	1A	26-Oct	1	No	28	28	53	116	63	143	1	8	0	18_26-Oct_1A_28	0	0	magic parents
Wu-0	1A	26-Oct	1	No	28	28	53	116	63	143	1	9	0	18_26-Oct_1A_28	0	0	magic parents
Wu-0	1A	26-Oct	1	No	28	28	53	116	63	143	1	10	0	18_26-Oct_1A_28	0	0	magic parents
Wu-0	1A	9-Nov	2	No	42	42	46	102	56	147	1	1	0	18_9-Nov_1A_42	0	0	magic parents
Wu-0	1A	9-Nov	2	No	42	42	46	102	56	147	1	2	0	18_9-Nov_1A_42	0	0	magic parents
Wu-0	1A	9-Nov	2	No	42	42	46	102	56	147	1	3	21	18_9-Nov_1A_42	20.58823529	45.65217391	magic parents
Wu-0	1A	9-Nov	2	No	42	42	46	102	56	147	1	4	16	18_9-Nov_1A_42	15.68627451	34.7826087	magic parents
Wu-0	1A	9-Nov	2	No	42	42	46	102	56	147	1	5	4	18_9-Nov_1A_42	3.921568627	8.695652174	magic parents
Wu-0	1A	9-Nov	2	No	42	42	46	102	56	147	1	6	5	18_9-Nov_1A_42	4.901960784	10.86956522	magic parents
Wu-0	1A	9-Nov	2	No	42	42	46	102	56	147	1	7	0	18_9-Nov_1A_42	0	0	magic parents
Wu-0	1A	9-Nov	2	No	42	42	46	102	56	147	1	8	0	18_9-Nov_1A_42	0	0	magic parents
Wu-0	1A	9-Nov	2	No	42	42	46	102	56	147	1	9	0	18_9-Nov_1A_42	0	0	magic parents
Wu-0	1A	9-Nov	2	No	42	42	46	102	56	147	1	10	0	18_9-Nov_1A_42	0	0	magic parents
Wu-0	1A	23-Nov	3	No	56	56	91	110	19	151	1	1	0	18_23-Nov_1A_56	0	0	magic parents
Wu-0	1A	23-Nov	3	No	56	56	91	110	19	151	1	2	0	18_23-Nov_1A_56	0	0	magic parents
Wu-0	1A	23-Nov	3	No	56	56	91	110	19	151	1	3	53	18_23-Nov_1A_56	48.18181818	58.24175824	magic parents
Wu-0	1A	23-Nov	3	No	56	56	91	110	19	151	1	4	20	18_23-Nov_1A_56	18.18181818	21.97802198	magic parents
Wu-0	1A	23-Nov	3	No	56	56	91	110	19	151	1	5	12	18_23-Nov_1A_56	10.90909091	13.18681319	magic parents
Wu-0	1A	23-Nov	3	No	56	56	91	110	19	151	1	6	6	18_23-Nov_1A_56	5.454545455	6.593406593	magic parents
Wu-0	1A	23-Nov	3	No	56	56	91	110	19	151	1	7	0	18_23-Nov_1A_56	0	0	magic parents
Wu-0	1A	23-Nov	3	No	56	56	91	110	19	151	1	8	0	18_23-Nov_1A_56	0	0	magic parents
Wu-0	1A	23-Nov	3	No	56	56	91	110	19	151	1	9	0	18_23-Nov_1A_56	0	0	magic parents
Wu-0	1A	23-Nov	3	No	56	56	91	110	19	151	1	10	0	18_23-Nov_1A_56	0	0	magic parents
Wu-0	2A	26-Oct	1	No	28	28	35	128	93	144	2	1	0	18_26-Oct_2A_28	0	0	magic parents
Wu-0	2A	26-Oct	1	No	28	28	35	128	93	144	2	2	0	18_26-Oct_2A_28	0	0	magic parents
Wu-0	2A	26-Oct	1	No	28	28	35	128	93	144	2	3	3	18_26-Oct_2A_28	2.34375	8.571428571	magic parents
Wu-0	2A	26-Oct	1	No	28	28	35	128	93	144	2	4	13	18_26-Oct_2A_28	10.15625	37.14285714	magic parents
Wu-0	2A	26-Oct	1	No	28	28	35	128	93	144	2	5	8	18_26-Oct_2A_28	6.25	22.85714286	magic parents
Wu-0	2A	26-Oct	1	No	28	28	35	128	93	144	2	6	10	18_26-Oct_2A_28	7.8125	28.57142857	magic parents
Wu-0	2A	26-Oct	1	No	28	28	35	128	93	144	2	7	1	18_26-Oct_2A_28	0.78125	2.857142857	magic parents
Wu-0	2A	26-Oct	1	No	28	28	35	128	93	144	2	8	0	18_26-Oct_2A_28	0	0	magic parents
Wu-0	2A	26-Oct	1	No	28	28	35	128	93	144	2	9	0	18_26-Oct_2A_28	0	0	magic parents
Wu-0	2A	26-Oct	1	No	28	28	35	128	93	144	2	10	0	18_26-Oct_2A_28	0	0	magic parents
Wu-0	2A	9-Nov	2	No	42	42	28	109	81	148	2	1	0	18_9-Nov_2A_42	0	0	magic parents
Wu-0	2A	9-Nov	2	No	42	42	28	109	81	148	2	2	0	18_9-Nov_2A_42	0	0	magic parents
Wu-0	2A	9-Nov	2	No	42	42	28	109	81	148	2	3	9	18_9-Nov_2A_42	8.256880734	32.14285714	magic parents
Wu-0	2A	9-Nov	2	No	42	42	28	109	81	148	2	4	11	18_9-Nov_2A_42	10.09174312	39.28571429	magic parents
Wu-0	2A	9-Nov	2	No	42	42	28	109	81	148	2	5	4	18_9-Nov_2A_42	3.669724771	14.28571429	magic parents
Wu-0	2A	9-Nov	2	No	42	42	28	109	81	148	2	6	4	18_9-Nov_2A_42	3.669724771	14.28571429	magic parents
Wu-0	2A	9-Nov	2	No	42	42	28	109	81	148	2	7	0	18_9-Nov_2A_42	0	0	magic parents
Wu-0	2A	9-Nov	2	No	42	42	28	109	81	148	2	8	0	18_9-Nov_2A_42	0	0	magic parents
Wu-0	2A	9-Nov	2	No	42	42	28	109	81	148	2	9	0	18_9-Nov_2A_42	0	0	magic parents
Wu-0	2A	9-Nov	2	No	42	42	28	109	81	148	2	10	0	18_9-Nov_2A_42	0	0	magic parents
Wu-0	2A	23-Nov	3	No	56	56	74	104	30	152	2	1	0	18_23-Nov_2A_56	0	0	magic parents
Wu-0	2A	23-Nov	3	No	56	56	74	104	30	152	2	2	0	18_23-Nov_2A_56	0	0	magic parents
Wu-0	2A	23-Nov	3	No	56	56	74	104	30	152	2	3	27	18_23-Nov_2A_56	25.96153846	36.48648649	magic parents
Wu-0	2A	23-Nov	3	No	56	56	74	104	30	152	2	4	26	18_23-Nov_2A_56	25	35.13513514	magic parents
Wu-0	2A	23-Nov	3	No	56	56	74	104	30	152	2	5	15	18_23-Nov_2A_56	14.42307692	20.27027027	magic parents
Wu-0	2A	23-Nov	3	No	56	56	74	104	30	152	2	6	6	18_23-Nov_2A_56	5.769230769	8.108108108	magic parents
Wu-0	2A	23-Nov	3	No	56	56	74	104	30	152	2	7	0	18_23-Nov_2A_56	0	0	magic parents
Wu-0	2A	23-Nov	3	No	56	56	74	104	30	152	2	8	0	18_23-Nov_2A_56	0	0	magic parents
Wu-0	2A	23-Nov	3	No	56	56	74	104	30	152	2	9	0	18_23-Nov_2A_56	0	0	magic parents
Wu-0	2A	23-Nov	3	No	56	56	74	104	30	152	2	10	0	18_23-Nov_2A_56	0	0	magic parents
Wu-0	2B	26-Oct	1	No	28	28	50	132	82	145	3	1	0	18_26-Oct_2B_28	0	0	magic parents
Wu-0	2B	26-Oct	1	No	28	28	50	132	82	145	3	2	0	18_26-Oct_2B_28	0	0	magic parents
Wu-0	2B	26-Oct	1	No	28	28	50	132	82	145	3	3	30	18_26-Oct_2B_28	22.72727273	60	magic parents
Wu-0	2B	26-Oct	1	No	28	28	50	132	82	145	3	4	13	18_26-Oct_2B_28	9.848484848	26	magic parents
Wu-0	2B	26-Oct	1	No	28	28	50	132	82	145	3	5	4	18_26-Oct_2B_28	3.03030303	8	magic parents
Wu-0	2B	26-Oct	1	No	28	28	50	132	82	145	3	6	1	18_26-Oct_2B_28	0.757575758	2	magic parents
Wu-0	2B	26-Oct	1	No	28	28	50	132	82	145	3	7	1	18_26-Oct_2B_28	0.757575758	2	magic parents
Wu-0	2B	26-Oct	1	No	28	28	50	132	82	145	3	8	0	18_26-Oct_2B_28	0	0	magic parents
Wu-0	2B	26-Oct	1	No	28	28	50	132	82	145	3	9	0	18_26-Oct_2B_28	0	0	magic parents
Wu-0	2B	26-Oct	1	No	28	28	50	132	82	145	3	10	1	18_26-Oct_2B_28	0.757575758	2	magic parents
Wu-0	2B	9-Nov	2	No	42	42	41	103	62	149	3	1	0	18_9-Nov_2B_42	0	0	magic parents
Wu-0	2B	9-Nov	2	No	42	42	41	103	62	149	3	2	0	18_9-Nov_2B_42	0	0	magic parents
Wu-0	2B	9-Nov	2	No	42	42	41	103	62	149	3	3	29	18_9-Nov_2B_42	28.15533981	70.73170732	magic parents
Wu-0	2B	9-Nov	2	No	42	42	41	103	62	149	3	4	6	18_9-Nov_2B_42	5.825242718	14.63414634	magic parents
Wu-0	2B	9-Nov	2	No	42	42	41	103	62	149	3	5	2	18_9-Nov_2B_42	1.941747573	4.87804878	magic parents
Wu-0	2B	9-Nov	2	No	42	42	41	103	62	149	3	6	2	18_9-Nov_2B_42	1.941747573	4.87804878	magic parents
Wu-0	2B	9-Nov	2	No	42	42	41	103	62	149	3	7	2	18_9-Nov_2B_42	1.941747573	4.87804878	magic parents
Wu-0	2B	9-Nov	2	No	42	42	41	103	62	149	3	8	0	18_9-Nov_2B_42	0	0	magic parents
Wu-0	2B	9-Nov	2	No	42	42	41	103	62	149	3	9	0	18_9-Nov_2B_42	0	0	magic parents
Wu-0	2B	9-Nov	2	No	42	42	41	103	62	149	3	10	0	18_9-Nov_2B_42	0	0	magic parents
Wu-0	2B	23-Nov	3	No	56	56	78	78	0	153	3	1	0	18_23-Nov_2B_56	0	0	magic parents
Wu-0	2B	23-Nov	3	No	56	56	78	78	0	153	3	2	1	18_23-Nov_2B_56	1.282051282	1.282051282	magic parents
Wu-0	2B	23-Nov	3	No	56	56	78	78	0	153	3	3	40	18_23-Nov_2B_56	51.28205128	51.28205128	magic parents
Wu-0	2B	23-Nov	3	No	56	56	78	78	0	153	3	4	26	18_23-Nov_2B_56	33.33333333	33.33333333	magic parents
Wu-0	2B	23-Nov	3	No	56	56	78	78	0	153	3	5	8	18_23-Nov_2B_56	10.25641026	10.25641026	magic parents
Wu-0	2B	23-Nov	3	No	56	56	78	78	0	153	3	6	3	18_23-Nov_2B_56	3.846153846	3.846153846	magic parents
Wu-0	2B	23-Nov	3	No	56	56	78	78	0	153	3	7	0	18_23-Nov_2B_56	0	0	magic parents
Wu-0	2B	23-Nov	3	No	56	56	78	78	0	153	3	8	0	18_23-Nov_2B_56	0	0	magic parents
Wu-0	2B	23-Nov	3	No	56	56	78	78	0	153	3	9	0	18_23-Nov_2B_56	0	0	magic parents
Wu-0	2B	23-Nov	3	No	56	56	78	78	0	153	3	10	0	18_23-Nov_2B_56	0	0	magic parents
Wu-0	3A	26-Oct	1	No	28	28	19	126	107	146	4	1	0	18_26-Oct_3A_28	0	0	magic parents
Wu-0	3A	26-Oct	1	No	28	28	19	126	107	146	4	2	0	18_26-Oct_3A_28	0	0	magic parents
Wu-0	3A	26-Oct	1	No	28	28	19	126	107	146	4	3	3	18_26-Oct_3A_28	2.380952381	15.78947368	magic parents
Wu-0	3A	26-Oct	1	No	28	28	19	126	107	146	4	4	3	18_26-Oct_3A_28	2.380952381	15.78947368	magic parents
Wu-0	3A	26-Oct	1	No	28	28	19	126	107	146	4	5	7	18_26-Oct_3A_28	5.555555556	36.84210526	magic parents
Wu-0	3A	26-Oct	1	No	28	28	19	126	107	146	4	6	4	18_26-Oct_3A_28	3.174603175	21.05263158	magic parents
Wu-0	3A	26-Oct	1	No	28	28	19	126	107	146	4	7	1	18_26-Oct_3A_28	0.793650794	5.263157895	magic parents
Wu-0	3A	26-Oct	1	No	28	28	19	126	107	146	4	8	1	18_26-Oct_3A_28	0.793650794	5.263157895	magic parents
Wu-0	3A	26-Oct	1	No	28	28	19	126	107	146	4	9	0	18_26-Oct_3A_28	0	0	magic parents
Wu-0	3A	26-Oct	1	No	28	28	19	126	107	146	4	10	0	18_26-Oct_3A_28	0	0	magic parents
Wu-0	3A	9-Nov	2	No	42	42	22	95	73	150	4	1	0	18_9-Nov_3A_42	0	0	magic parents
Wu-0	3A	9-Nov	2	No	42	42	22	95	73	150	4	2	0	18_9-Nov_3A_42	0	0	magic parents
Wu-0	3A	9-Nov	2	No	42	42	22	95	73	150	4	3	4	18_9-Nov_3A_42	4.210526316	18.18181818	magic parents
Wu-0	3A	9-Nov	2	No	42	42	22	95	73	150	4	4	7	18_9-Nov_3A_42	7.368421053	31.81818182	magic parents
Wu-0	3A	9-Nov	2	No	42	42	22	95	73	150	4	5	0	18_9-Nov_3A_42	0	0	magic parents
Wu-0	3A	9-Nov	2	No	42	42	22	95	73	150	4	6	7	18_9-Nov_3A_42	7.368421053	31.81818182	magic parents
Wu-0	3A	9-Nov	2	No	42	42	22	95	73	150	4	7	3	18_9-Nov_3A_42	3.157894737	13.63636364	magic parents
Wu-0	3A	9-Nov	2	No	42	42	22	95	73	150	4	8	1	18_9-Nov_3A_42	1.052631579	4.545454545	magic parents
Wu-0	3A	9-Nov	2	No	42	42	22	95	73	150	4	9	0	18_9-Nov_3A_42	0	0	magic parents
Wu-0	3A	9-Nov	2	No	42	42	22	95	73	150	4	10	0	18_9-Nov_3A_42	0	0	magic parents
Wu-0	3A	23-Nov	3	No	56	56	52	109	57	154	4	1	0	18_23-Nov_3A_56	0	0	magic parents
Wu-0	3A	23-Nov	3	No	56	56	52	109	57	154	4	2	1	18_23-Nov_3A_56	0.917431193	1.923076923	magic parents
Wu-0	3A	23-Nov	3	No	56	56	52	109	57	154	4	3	15	18_23-Nov_3A_56	13.76146789	28.84615385	magic parents
Wu-0	3A	23-Nov	3	No	56	56	52	109	57	154	4	4	23	18_23-Nov_3A_56	21.10091743	44.23076923	magic parents
Wu-0	3A	23-Nov	3	No	56	56	52	109	57	154	4	5	10	18_23-Nov_3A_56	9.174311927	19.23076923	magic parents
Wu-0	3A	23-Nov	3	No	56	56	52	109	57	154	4	6	3	18_23-Nov_3A_56	2.752293578	5.769230769	magic parents
Wu-0	3A	23-Nov	3	No	56	56	52	109	57	154	4	7	0	18_23-Nov_3A_56	0	0	magic parents
Wu-0	3A	23-Nov	3	No	56	56	52	109	57	154	4	8	0	18_23-Nov_3A_56	0	0	magic parents
Wu-0	3A	23-Nov	3	No	56	56	52	109	57	154	4	9	0	18_23-Nov_3A_56	0	0	magic parents
Wu-0	3A	23-Nov	3	No	56	56	52	109	57	154	4	10	0	18_23-Nov_3A_56	0	0	magic parents
Zu-0	1	17-May	1b	Yes	32	32	42	138	96	155	1	1	0	19_17-May_1_32	0	0	magic parents
Zu-0	1	17-May	1b	Yes	32	32	42	138	96	155	1	2	4	19_17-May_1_32	2.898550725	9.523809524	magic parents
Zu-0	1	17-May	1b	Yes	32	32	42	138	96	155	1	3	5	19_17-May_1_32	3.623188406	11.9047619	magic parents
Zu-0	1	17-May	1b	Yes	32	32	42	138	96	155	1	4	14	19_17-May_1_32	10.14492754	33.33333333	magic parents
Zu-0	1	17-May	1b	Yes	32	32	42	138	96	155	1	5	10	19_17-May_1_32	7.246376812	23.80952381	magic parents
Zu-0	1	17-May	1b	Yes	32	32	42	138	96	155	1	6	8	19_17-May_1_32	5.797101449	19.04761905	magic parents
Zu-0	1	17-May	1b	Yes	32	32	42	138	96	155	1	7	1	19_17-May_1_32	0.724637681	2.380952381	magic parents
Zu-0	1	17-May	1b	Yes	32	32	42	138	96	155	1	8	0	19_17-May_1_32	0	0	magic parents
Zu-0	1	17-May	1b	Yes	32	32	42	138	96	155	1	9	0	19_17-May_1_32	0	0	magic parents
Zu-0	1	17-May	1b	Yes	32	32	42	138	96	155	1	10	0	19_17-May_1_32	0	0	magic parents
Zu-0	1	17-May	1b	Yes	32	32	42	138	96	155	1	11	0	19_17-May_1_32	0	0	magic parents
Zu-0	2	17-May	1b	Yes	32	32	63	133	70	156	2	1	0	19_17-May_2_32	0	0	magic parents
Zu-0	2	17-May	1b	Yes	32	32	63	133	70	156	2	2	0	19_17-May_2_32	0	0	magic parents
Zu-0	2	17-May	1b	Yes	32	32	63	133	70	156	2	3	6	19_17-May_2_32	4.511278195	9.523809524	magic parents
Zu-0	2	17-May	1b	Yes	32	32	63	133	70	156	2	4	29	19_17-May_2_32	21.80451128	46.03174603	magic parents
Zu-0	2	17-May	1b	Yes	32	32	63	133	70	156	2	5	18	19_17-May_2_32	13.53383459	28.57142857	magic parents
Zu-0	2	17-May	1b	Yes	32	32	63	133	70	156	2	6	8	19_17-May_2_32	6.015037594	12.6984127	magic parents
Zu-0	2	17-May	1b	Yes	32	32	63	133	70	156	2	7	1	19_17-May_2_32	0.751879699	1.587301587	magic parents
Zu-0	2	17-May	1b	Yes	32	32	63	133	70	156	2	8	1	19_17-May_2_32	0.751879699	1.587301587	magic parents
Zu-0	2	17-May	1b	Yes	32	32	63	133	70	156	2	9	0	19_17-May_2_32	0	0	magic parents
Zu-0	2	17-May	1b	Yes	32	32	63	133	70	156	2	10	0	19_17-May_2_32	0	0	magic parents
Zu-0	2	17-May	1b	Yes	32	32	63	133	70	156	2	11	0	19_17-May_2_32	0	0	magic parents
Zu-0	3	17-May	1b	Yes	32	32	83	142	59	157	3	1	0	19_17-May_3_32	0	0	magic parents
Zu-0	3	17-May	1b	Yes	32	32	83	142	59	157	3	2	0	19_17-May_3_32	0	0	magic parents
Zu-0	3	17-May	1b	Yes	32	32	83	142	59	157	3	3	15	19_17-May_3_32	10.56338028	18.07228916	magic parents
Zu-0	3	17-May	1b	Yes	32	32	83	142	59	157	3	4	34	19_17-May_3_32	23.94366197	40.96385542	magic parents
Zu-0	3	17-May	1b	Yes	32	32	83	142	59	157	3	5	27	19_17-May_3_32	19.01408451	32.53012048	magic parents
Zu-0	3	17-May	1b	Yes	32	32	83	142	59	157	3	6	4	19_17-May_3_32	2.816901408	4.819277108	magic parents
Zu-0	3	17-May	1b	Yes	32	32	83	142	59	157	3	7	2	19_17-May_3_32	1.408450704	2.409638554	magic parents
Zu-0	3	17-May	1b	Yes	32	32	83	142	59	157	3	8	0	19_17-May_3_32	0	0	magic parents
Zu-0	3	17-May	1b	Yes	32	32	83	142	59	157	3	9	0	19_17-May_3_32	0	0	magic parents
Zu-0	3	17-May	1b	Yes	32	32	83	142	59	157	3	10	0	19_17-May_3_32	0	0	magic parents
Zu-0	3	17-May	1b	Yes	32	32	83	142	59	157	3	11	1	19_17-May_3_32	0.704225352	1.204819277	magic parents
