# Supplementary material for: An ABA-GA bistable switch can account for natural variation in the variability of Arabidopsis seed germination time
Source: eLife. 2021 Jun 1;10:e59485. doi: 10.7554/eLife.59485 (PMC8169117; doi:10.7554/eLife.59485)
Supplement: Supplementary file 4. [file elife-59485-supp4.xlsx]

## Sheet: Sheet1
mutant	background	WT forward primer	WT reverse primer	product (bp)	Mutant forward primer	Mutant reverse primer	product (bp)
dog1 (pst21966)	No-0	DOG1N_F GAAATCCGCTCCTTGTACCG	DOG1N_R GCATCCCTGAGCTCAAACAA	992	DOG1N_R GCATCCCTGAGCTCAAACAA	Ds5-2a TCCGTTCCGTTTTCGTTTTTTAC	~400bp
dog1-3 (SALK_000867)	Col-0	DOG1-3 F TTCCAGGAACGTTGTCGTATC	DOG1-3 R AGTTTGTGACCCACACAAAGC	1161	LBb1.3	DOG1-3 R AGTTTGTGACCCACACAAAGC	~500bp
anac060 (SALK_012554C)	Col-0	ANAC060 F TGGACTCTGTTTGAAGCCTTG	ANAC060 R TATGCCTGTCCTGATTTGCTC	1122	LBb1.3	ANAC060 R TATGCCTGTCCTGATTTGCTC	~800bp
ahg1-5 (SALK 049885C)	Col-0	AHG1 LP ACCGACACGTGTTCTGTCTTC	AHG1 RP CTAAAACTCGACCACCAGCTG	1116	LBb1.3	AHG1 RP CTAAAACTCGACCACCAGCTG	600bp
